# Supplementary material for: Wittig reagents for chemoselective sulfenic acid ligation enables global site stoichiometry analysis and redox-controlled mitochondrial targeting
Source: Research Square preprint supplement (doi:10.21203/rs.3.rs-110280/v1), 2020-11-30
Supplement: Supplementary file 1 [file e3aea476ce6f3fe8e726844a.pdf]

## Supplementary Information

### Wittig reagents for chemoselective sulfenic acid ligation enables global site stoichiometry analysis and redox-controlled mitochondrial targeting

Yunlong Shi<sup>1</sup>, Ling Fu<sup>2,3</sup>, Jing Yang<sup>2\*</sup> and Kate S. Carroll<sup>1\*</sup>

<sup>1</sup>Department of Chemistry, The Scripps Research Institute, Jupiter, Florida 33458, United States

<sup>2</sup>State Key Laboratory of Proteomics, Beijing Proteome Research Center, National Center for Protein Sciences • Beijing, Beijing Institute of Lifeomics, Beijing 102206, China

<sup>3</sup>Innovation Institute of Medical School, Medical College, Qingdao University, Qingdao 266071, China

\*e-mail: [kcarroll@scripps.edu](mailto:kcarroll@scripps.edu)

\*e-mail: [yangjing54@hotmail.com](mailto:yangjing54@hotmail.com)

#### Table of contents

- Supplementary figures.....2
- Supplementary methods.....25
- Synthetic procedures.....35
- References.....51
- <sup>1</sup>H and <sup>13</sup>C NMR spectra.....52

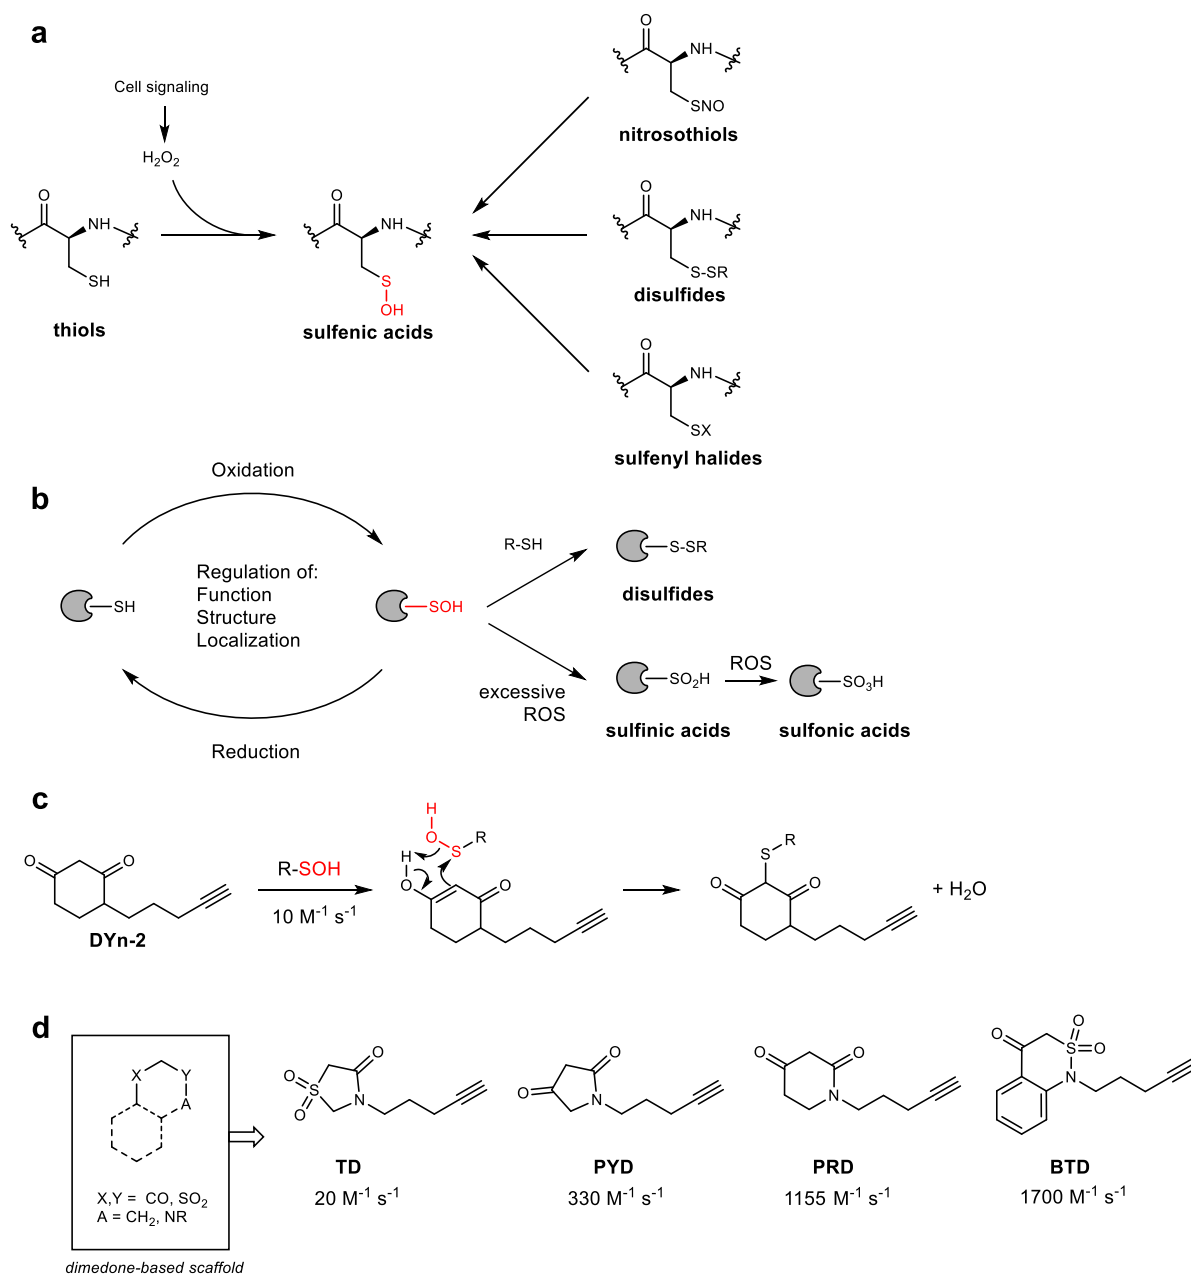

24

25 **Supplementary Fig. 1 | C-Nucleophiles as probes for sulfenic acids.** **a**, Two routes to the generation  
 26 of the cysteine S-sulfenylation posttranslational modifications, including the oxidation of thiols and the  
 27 hydrolysis of polarized sulfur species. **b**, The fates of protein sulfenic acids. They can play a role as a  
 28 redox switch, forming disulfide bonds, or underwent irreversible oxidation to sulfenic and sulfonic acids  
 29 under stress conditions. **c**, Mechanism of sulfenic acid labeling by DYn-2, a nucleophilic probe based on  
 30 the 1,3-cyclohexadione scaffold. **d**, A functional group diversification strategy generates a library of  
 31 nucleophiles with diverse reactivity.

32

33

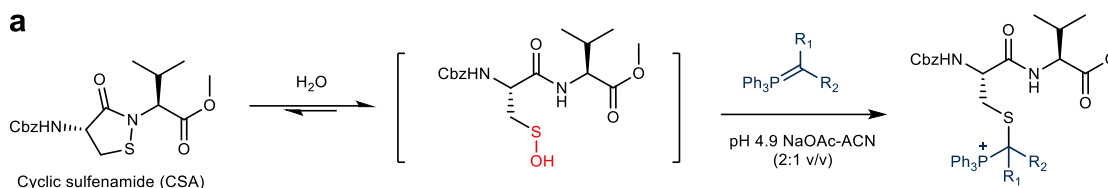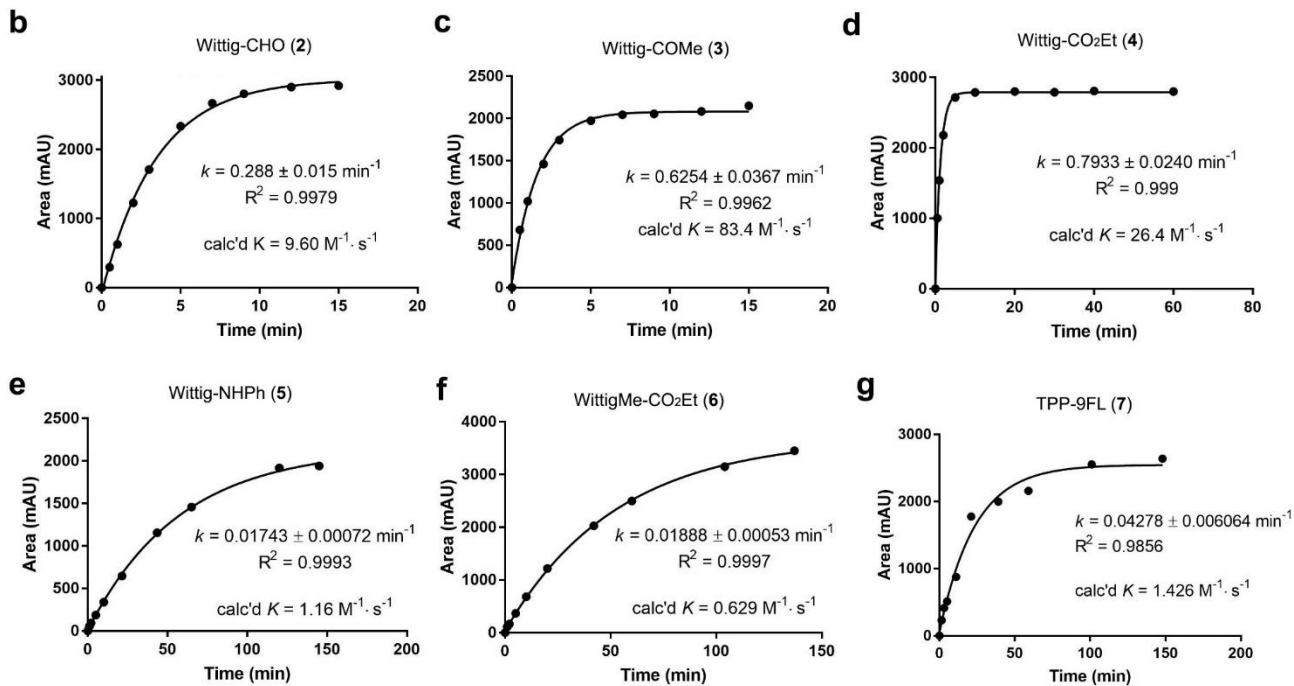

34

35 **Supplementary Fig. 2 | Pseudo-first order rate plots of reactions between Wittig reagents and a**  
 36 **cyclic sulfenamide (CSA).** Detailed experimental procedure is described in supplementary methods.  
 37 **a**, A small molecule dipeptide model of sulfenic acid was used to evaluate the kinetics of Wittig reagents.  
 38 All reactions were carried in 25 mM NaOAc-ACN (2:1 v/v), pH 4.9 buffer. **b**, First order kinetic plot of 500  
 39  $\mu\text{M}$  Wittig-CHO (2) and 100  $\mu\text{M}$  CSA. **c**, First order kinetic plot of 125  $\mu\text{M}$  Wittig-COMe (3) and 25  $\mu\text{M}$   
 40 CSA. **d**, First order kinetic plot of 500  $\mu\text{M}$  Wittig-CO<sub>2</sub>Et (4) and 100  $\mu\text{M}$  CSA. **e**, First order kinetic plot  
 41 of 250  $\mu\text{M}$  Wittig-NHPh (5) and 25  $\mu\text{M}$  CSA. **f**, First order kinetic plot of 500  $\mu\text{M}$  WittigMe-CO<sub>2</sub>Et (6) and  
 42 100  $\mu\text{M}$  CSA. **g**, First order kinetic plot of 500  $\mu\text{M}$  TPP-9FL (7) and 50  $\mu\text{M}$  CSA.

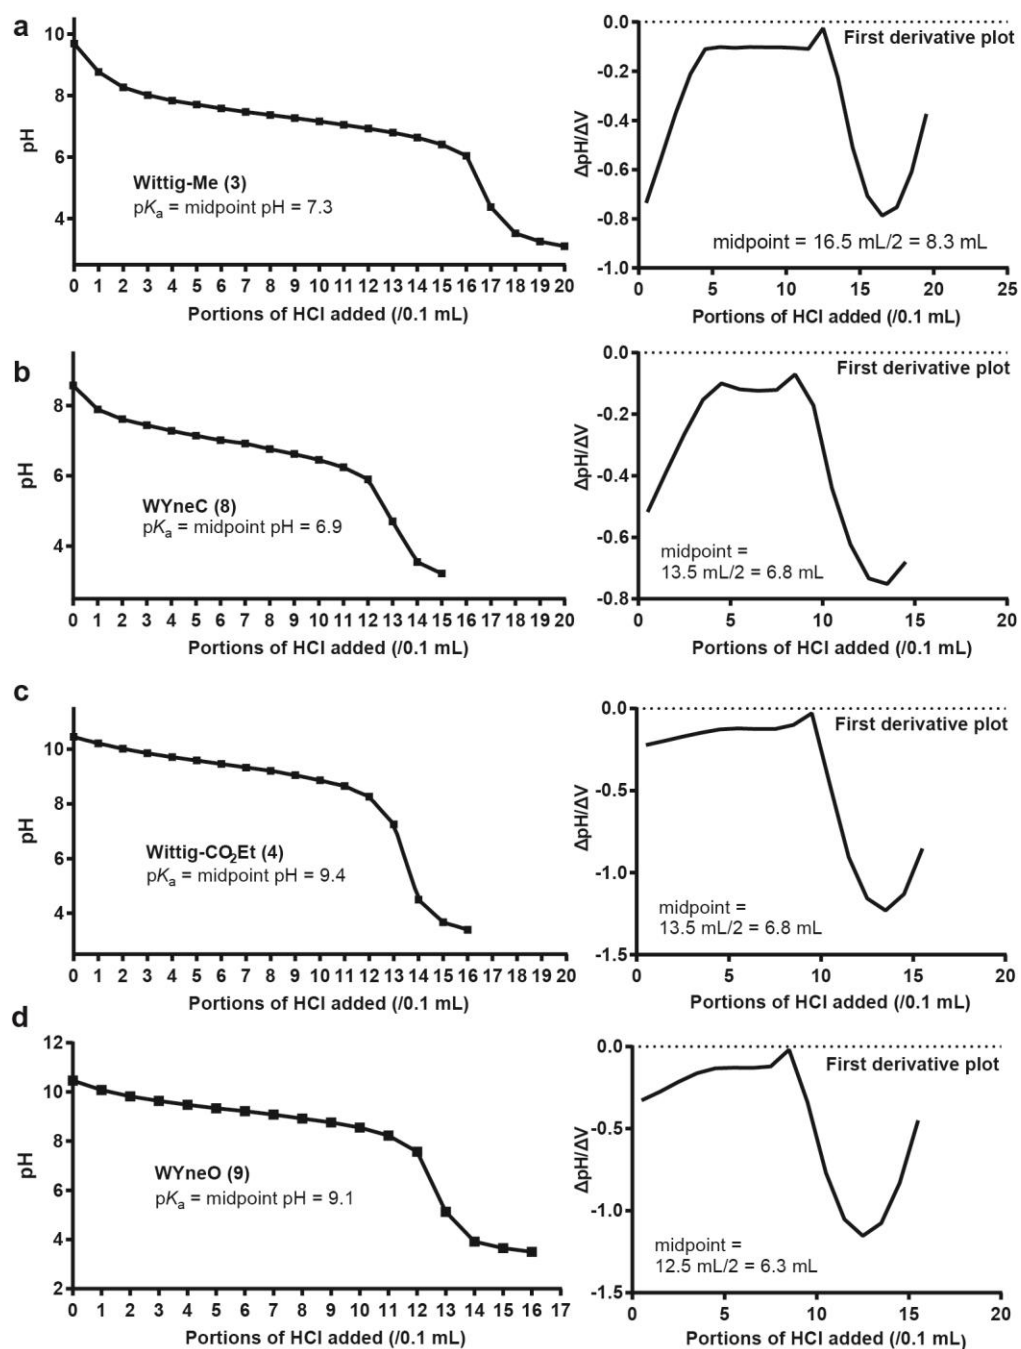

43

44 **Supplementary Fig. 3 | Titration and  $pK_a$  determination of Wittig reagents.** A solution (3 mL,  
 45 ACN:H<sub>2</sub>O = 1:2) of Wittig reagent (5 mM) was prepared in a glass reaction vial. HCl solution (ACN:H<sub>2</sub>O  
 46 = 1:2, approx. 10 mM) was added with 0.1 mL interval with stirring while the pH of the solution was  
 47 recorded.  $pK_a$  was determined to be the pH at midpoint (halfway of the equivalence point where pH  
 48 drastically decreases). **a**, Titration of Wittig-Me (3). **b**, Titration of WYneC (8). **c**, Titration of Wittig-  
 49 CO<sub>2</sub>Et (4). **d**, Titration of WYneO (9).

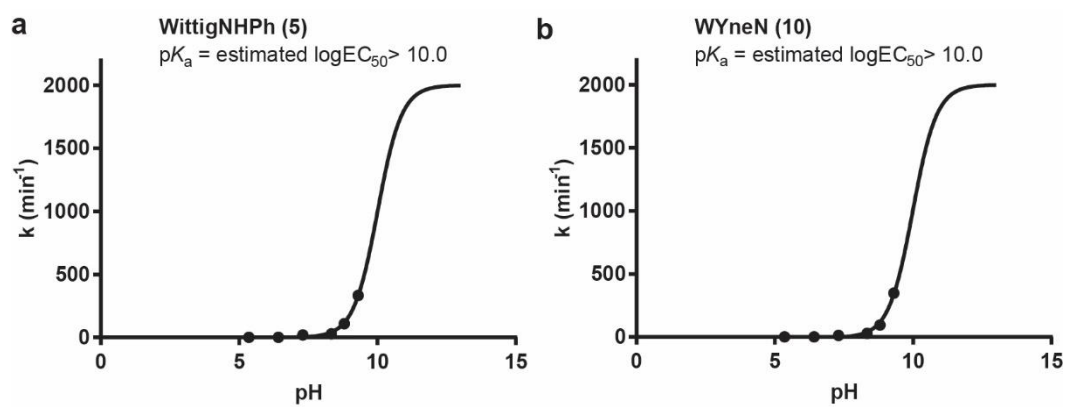

50

51 **Supplementary Fig. 4  $pK_a$  determination of amide derivatives of Wittig reagents.** Due to instability  
 52 in basic solutions,  $pK_a$  cannot be determined by titration. Instead, their reaction rates with CSA at various  
 53 pH were fitted as sigmoid functions (upper limit set at 2,000 min<sup>-1</sup>) and  $pK_a$  was derived from the  $\log EC_{50}$   
 54 of the curve. **a**, Estimated  $pK_a$  of WittigNHPH (5). **b**, Estimated  $pK_a$  of WYneN (10).

55

56

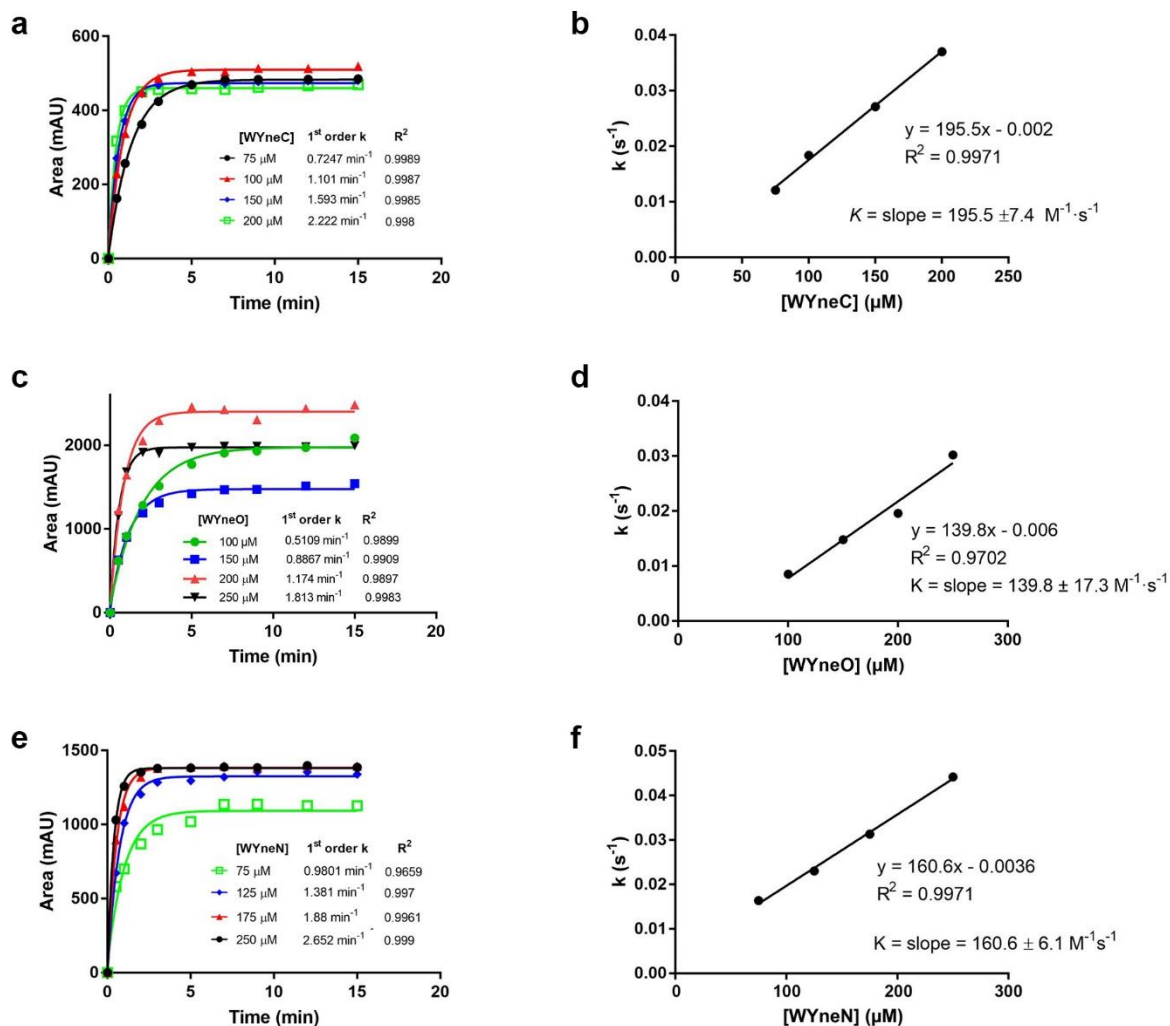

57

58 **Supplementary Fig. 5 | Second order rate plots of reactions of WYne probes.** Calculation is  
 59 described in supplementary methods. **a**, First order rate constants of WYneC (**8**) at pH 4.9. **b**, Second  
 60 order rate of WYneC (**8**) was obtained from linear regression of first order reaction rates vs.  
 61 concentrations of the probe. **c**, First order rate constants of WYneO (**9**) at pH 4.9. **d**, Second  
 62 order rate of WYneO (**9**) was obtained from linear regression of first order reaction rates vs. concentrations of the  
 63 probe. **e**, First order rate constants of WYneN (**10**) at pH 7.4. **f**, Second order rate of WYneN (**10**) was  
 64 obtained from linear regression of first order reaction rates vs. concentrations of the probe.

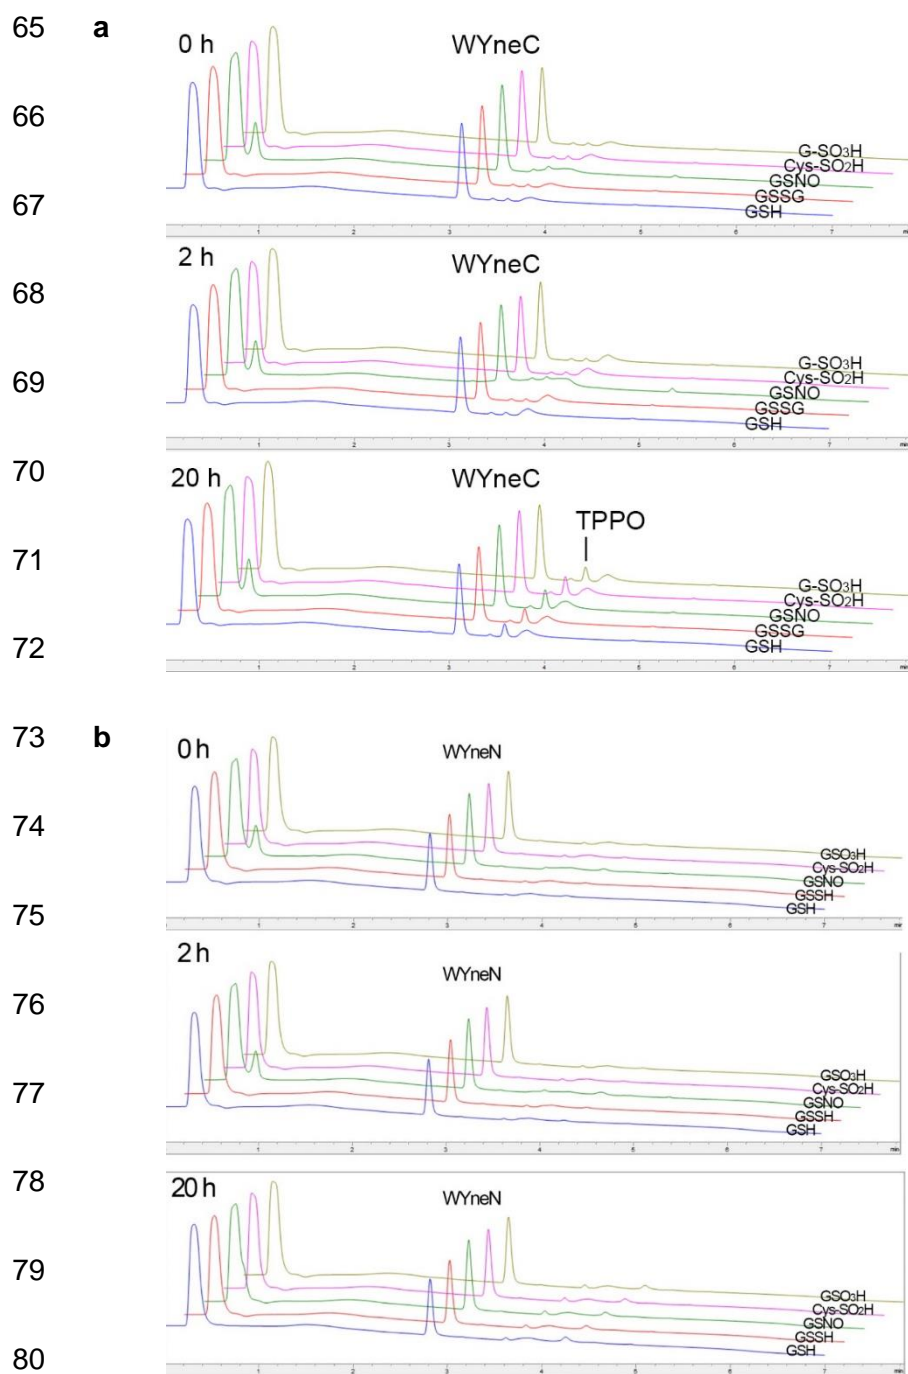

81 **Supplementary Fig. 6 | Cross-reactivity study of WYne probes with cysteine oxoforms.** Except  
 82 that a small amount of WYneC was decomposed to triphenylphosphine oxide (TPPO) due to hydrolysis,  
 83 the peak sizes of WYneC/N did not change over time, indicating no reactivity with these sulfur compounds.  
 84 Studies were performed with 0.1 mM solutions of WYneC/N in 1 mL HEPES buffer (degas by N<sub>2</sub>, 2:1  
 85 HEPES:ACN (v/v), 50 mM HEPES, 100 mM NaCl, pH 7.4) with one of the sulfur-containing compounds  
 86 (1 mM, GSH: glutathione reduced; GSSG: glutathione disulfide; GSNO: S-nitrosoglutathione; Cys-SO<sub>2</sub>H:  
 87 cysteine sulfinic acid; G-SO<sub>3</sub>H: glutathionesulfonic acid). The resulting solutions were kept at room  
 88 temperature and analyzed on LC-MS after 0, 2 and 20 h. **a**, LC traces (190 nm) of WYneC (**8**) and  
 89 cysteine oxoforms. **b**, LC traces (190 nm) of WYneN (**10**) and cysteine oxoforms.

90

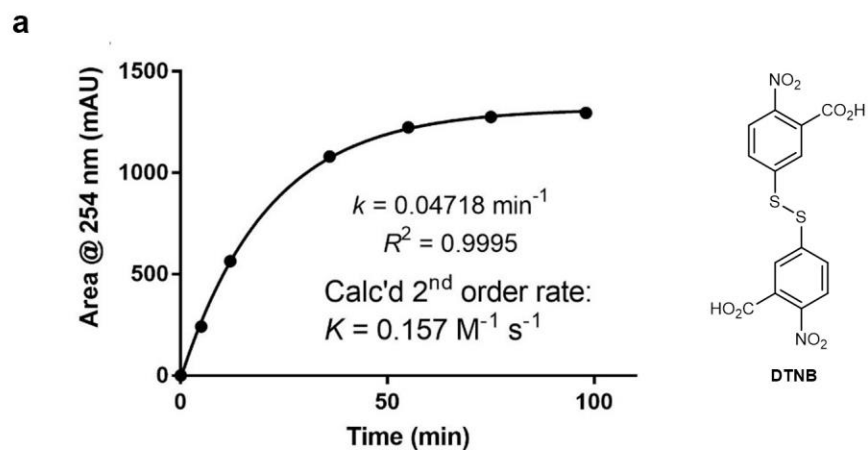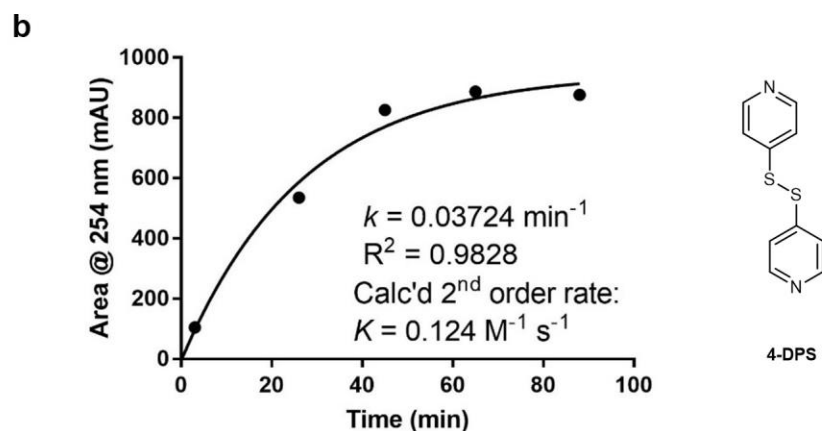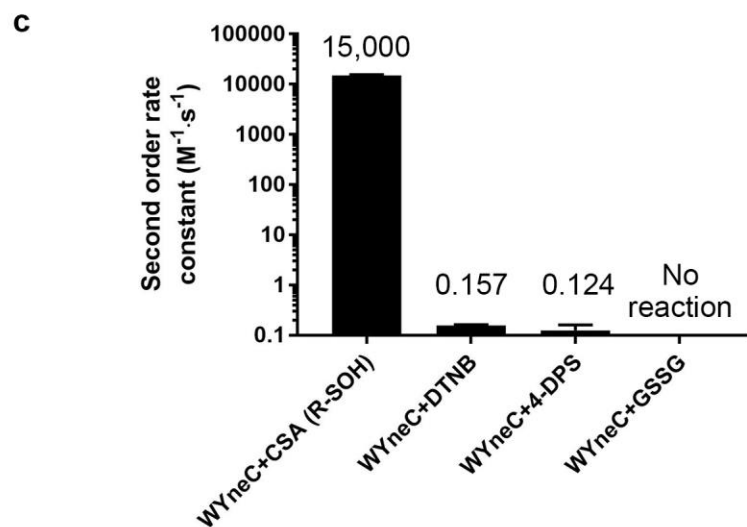

91

92 **Supplementary Fig. 7 | Reaction kinetics between WYneC and disulfides.** **a**, Reaction between 0.25  
 93 mM of WYneC (**3**) and 5 mM of DTNB in 50 mM HEPES buffer, pH 7.4. **b**, Reaction between 0.25 mM  
 94 of WYneC (**3**) and 5 mM of 4-DPS in 50 mM HEPES buffer, pH 7.4. **c**, Reaction rate of WYneC (**3**) with  
 95 CSA (R-SOH) is much higher than “activated” disulfides DTNB (95,500-fold) and 4-DPS (120,000-fold),  
 96 while an “inert” disulfide (GSSG) did not react with WYneC.



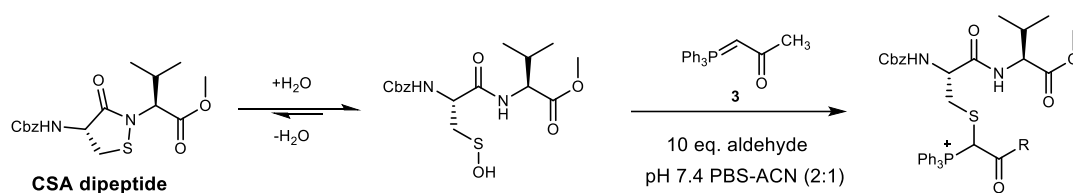

Aldehydes tested:

**a**

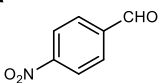

**4-Nitrobenzaldehyde**

**b**

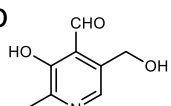

**Pyridoxal**

**c**

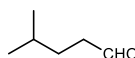

**Isovaleraldehyde**

**d**

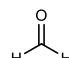

**Formaldehyde**

97

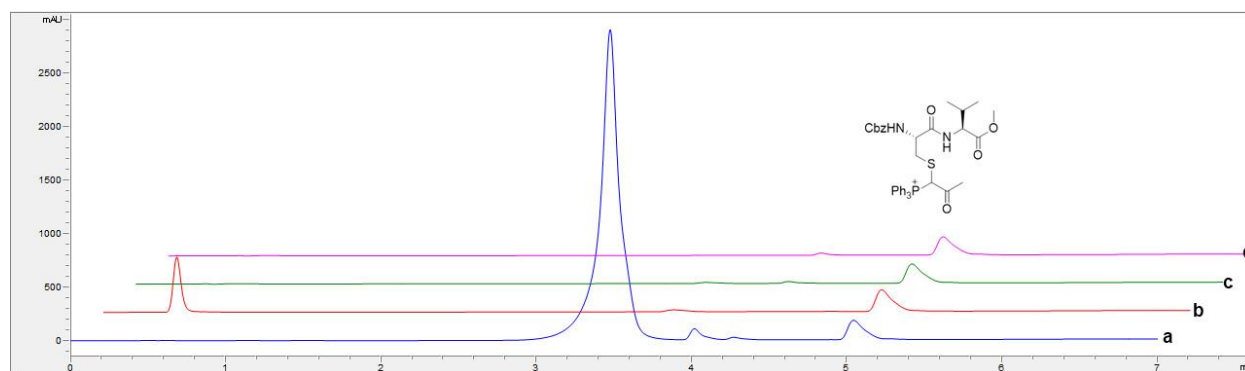

98

99 **Supplementary Fig. 8 | Reaction of Wittig-Me (3) in presence of aldehydes.** Wittig-Me (1 mM)  
 100 reacted with CSA dipeptide (1 mM) in PBS-ACN (2:1 v/v, pH 7.4) buffer with various aldehydes (10 mM):  
 101 4-nitrobenzaldehyde (**a**); pyridoxal (**b**); isovaleraldehyde (**c**) and formaldehyde (**d**). Quantitative product  
 102 formation was observed in all four cases, indicating no interference from aldehydes.

**WYne-S  
dipeptide  
adducts:**  
(X=CH<sub>2</sub>, NH, O)

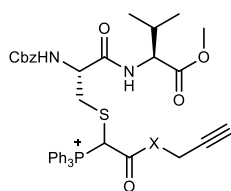

|                                              | Adduct stability<br>0.25 mM in<br>HEPES buffer | Adduct stability<br>0.25 mM in<br>HEPES with<br>10 mM DTT | Adduct stability<br>0.25 mM in<br>pH 9.5<br>NH <sub>4</sub> HCO <sub>3</sub> buffer <sup>a</sup> | Adduct stability<br>0.25 mM in<br>pH 3.0<br>SCX buffer <sup>b</sup> |
|----------------------------------------------|------------------------------------------------|-----------------------------------------------------------|--------------------------------------------------------------------------------------------------|---------------------------------------------------------------------|
| <b>WYneC-S-Adduct</b><br>X = CH <sub>2</sub> | stable <sup>c</sup>                            | stable                                                    | stable                                                                                           | stable                                                              |
| <b>WYneO-S-Adduct</b><br>X = O               | stable                                         | <i>t</i> <sub>1/2</sub> = 0.5 h                           | stable                                                                                           | stable                                                              |
| <b>WYneN-S-Adduct</b><br>X = NH              | stable                                         | <i>t</i> <sub>1/2</sub> < 0.5 h                           | 20% TPP cleavage<br>after 20 h                                                                   | stable                                                              |

<sup>a</sup> 25 mM NH<sub>4</sub>HCO<sub>3</sub>, 33% ACN, pH 9.5.

<sup>b</sup> 5 mM NaH<sub>2</sub>PO<sub>4</sub>, 25% ACN, pH 3.0.

<sup>c</sup> Indicates no degradation after 20 h at room temperature.

103

104 **Supplementary Fig. 9 | Stability of WYne-S-dipeptide adducts at room temperature.** The probes  
105 and their labeling products (WYne-S-dipeptide adducts) were studied under various conditions as  
106 indicated above. Compound stability was evaluated by periodic LC-MS analyses over a time period of  
107 20 h.

108

109

110

111

112

113

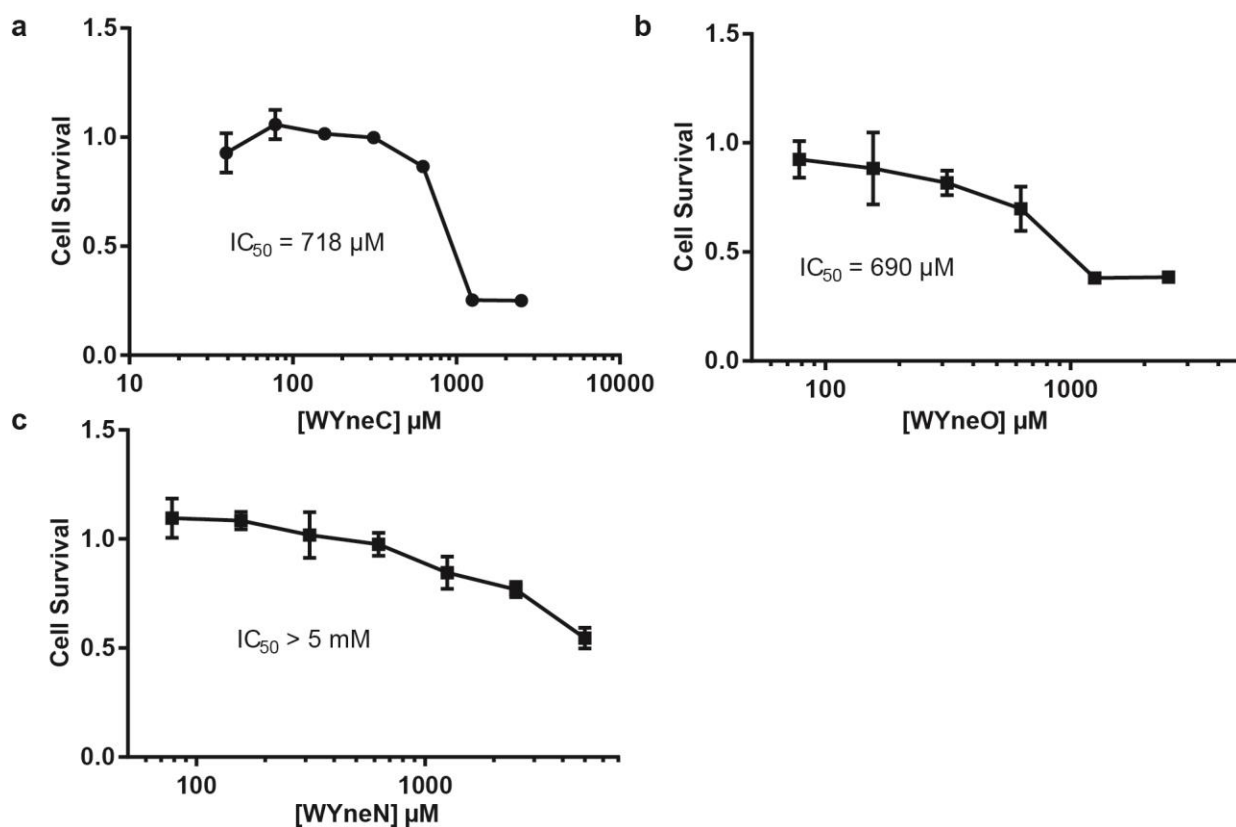

114

115 **Supplementary Fig. 10 | Cytotoxicity of WYne probes in A549 cells.** Exponentially growing HeLa  
 116 cells were seeded in a 96-well plate at a density of 6,000 cells/well. After 16 h, culture media were  
 117 replaced with 100  $\mu\text{L}$  media containing test compounds or vehicle (2% DMSO). After 2 h incubation,  
 118 culture media were replaced with 100  $\mu\text{L}$  fresh media and 20  $\mu\text{L}$  MTS reagent (CellTiter 96 AQueous One  
 119 Solution Cell Proliferation Assay, Promega). After 1.5 h incubation at 37°C, the absorbance at 490 nm  
 120 was recorded. Data was plotted as survival ( $A_{490}$  ratio of treatment/control) vs. concentration by  
 121 GraphPad Prism 7 using the “Inhibitor vs. response -- Variable slope (four parameters)” function. **a**,  
 122 Cytotoxicity assay of WYneC. **b**, Cytotoxicity assay of WYneO. **c**, Cytotoxicity assay of WYneN.

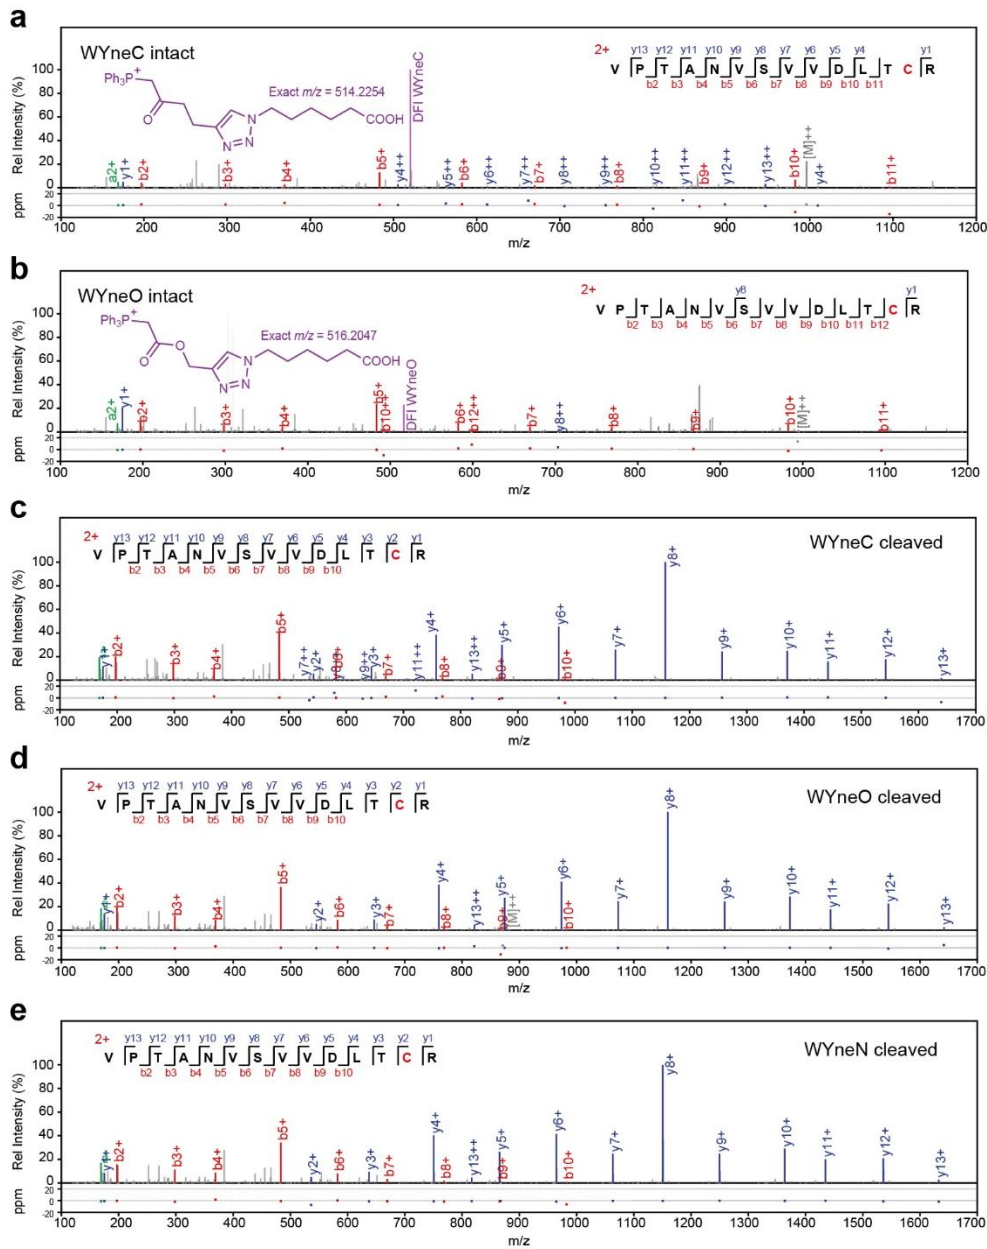

123

124 **Supplementary Fig. 11 | Representative MS/MS spectra of the GAPDH peptides bearing WYne**  
 125 **probes-derived cysteine adduction. a-b,** MS/MS spectra of the GAPDH peptides bearing intact  
 126 WYneC and WYneO probe, respectively. Diagnostic fragment ions (DFIs) provided by C-S bond  
 127 cleavage from the intact probe-peptide adducts are shown in purple color. **c-e,** MS/MS spectra of the  
 128 GAPDH peptides bearing WYne probes with a loss of triphenylphosphine.

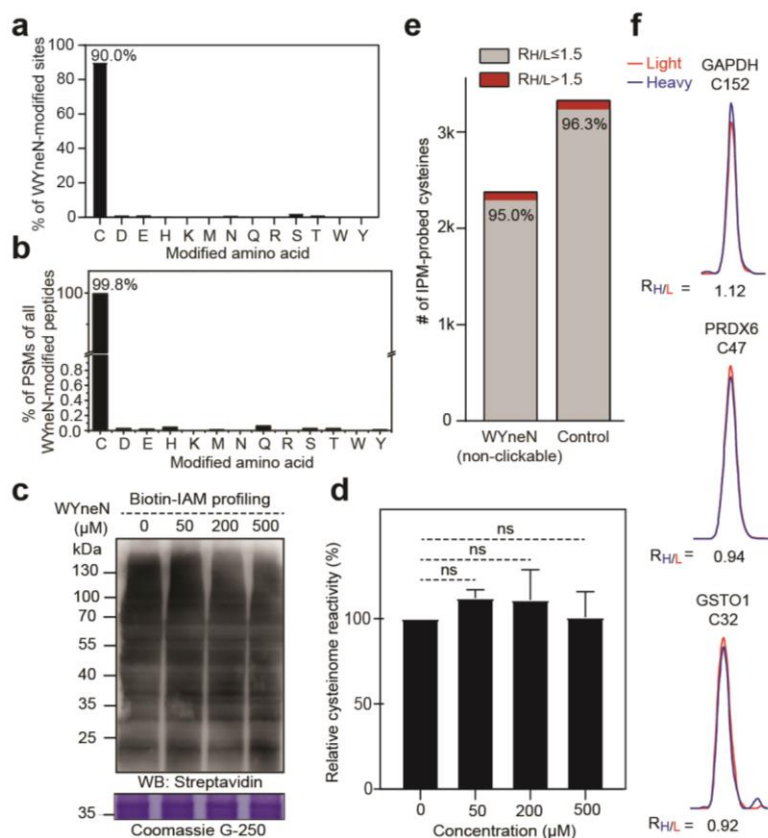

129

130 **Supplementary Fig. 12 Proteome-wide selectivity of WYneN.** **a-b**, Analysis of the amino acid  
 131 specificity of WYneN. A549 cells labeled with WYneN were processed and analyzed as described in the  
 132 methods section of this Supporting Information. pFind software was used to allowing the modification on  
 133 any potentially polar amino acid. Bar charts showing the percentages of probe-modified sites (**a**) or the  
 134 percentages of spectral counts of probe-modified sites (**b**) for individual amino acids. **c-d**, Representative  
 135 western blot (**c**) and quantification (**d**) demonstrating that *in situ* WYneN treatment does not perturb the  
 136 cysteinome. A549 cells were labeled with WYneN at the indicated concentrations at 37°C for 2h. Then  
 137 the cell lysates were harvested and labeled with a thiol-reactive probe, namely biotin-IAM, separated with  
 138 SDS-PAGE, and analyzed with streptavidin-HRP-based western blotting. ns, not significant. Student's t-  
 139 test. **e**, QTRP-based site-specific analysis showing that both non-clickable WYne warhead and vehicle  
 140 control had no significant impact on the cysteinome. A549 cells treated with or without WYne warhead  
 141 were labeled *in vitro* with a “clickable” thiol-reactive probe IPM. The probe-tagged proteomes were  
 142 processed and analyzed as previously described<sup>1</sup>. In principle, only high heavy-to-light ratio ( $R_{H/L}$ , control  
 143 versus treatment) values are indicative of cysteines that have less free thiol being available after WYneN  
 144 warhead treatment. Not unexpectedly, those cysteines perturbed by either control or WYneN warhead  
 145 treatment comprised only ~5% of all quantified sites, when a common cutoff (1.5-fold change) was  
 146 applied. **f**, Representative extracted-ion chromatograms from (**e**) showing no change in IPM-tagged  
 147 peptides from three well-known redox sensors, including GAPDH (C152), PRDX6 (C47) and GSTO1  
 148 (C32), from A549 cells treated with the non-clickable WYneN. The profiles for light- and heavy-labeled  
 149 peptides are shown in red and blue, respectively. Heavy (Control)/light(treatment) ratios were calculated  
 150 from biological duplicates and are displayed below the individual chromatograms.

151

152

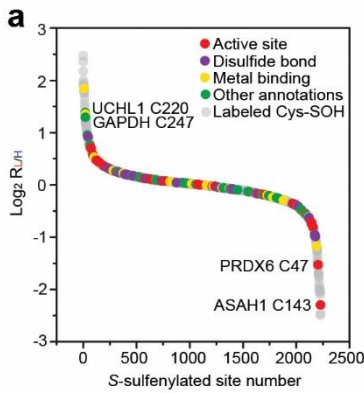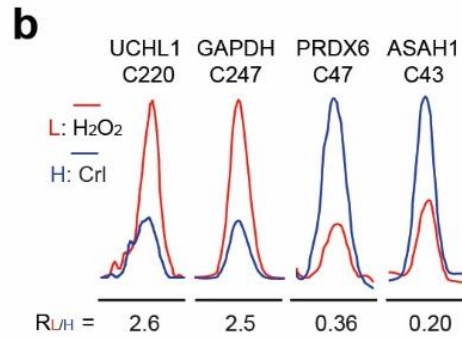

153

154 **Supplementary Fig. 13 | WYneN-based in situ S-sulfenylome analysis.** **a**, Rank plot showing site-  
 155 specific changes in cysteine S-sulfenylation in A549 cells proteome in response to H<sub>2</sub>O<sub>2</sub> treatment. Those  
 156 sites with known functions retrieved from the Uniprot database are labeled in different colors as indicated.  
 157 **b**, Extracted-ion chromatograms showing changes in WYneN-tagged peptides from UCHL1 (C220),  
 158 GAPDH (C247), PRDX6 (C47) and ASAH1 (C43) from H<sub>2</sub>O<sub>2</sub> stimulation of A549 cells. The profiles for  
 159 light- and heavy-labeled peptides are shown in red and blue, respectively. Heavy (H<sub>2</sub>O<sub>2</sub>)/light (control)  
 160 ratios were calculated from biological duplicates and are displayed below the individual chromatograms.

161

162

163

164

165

166

167

168

169

170

171

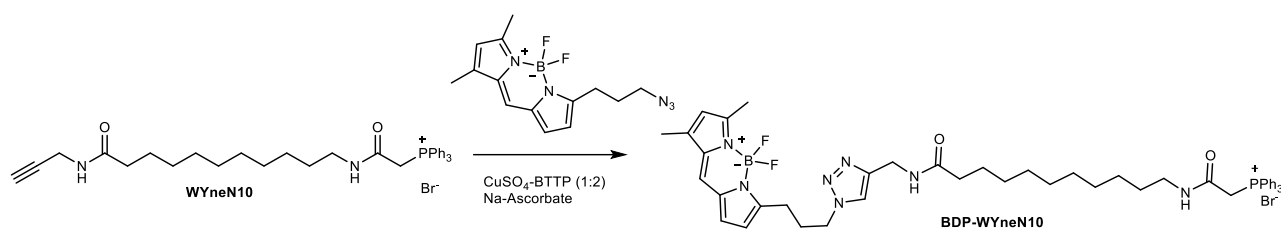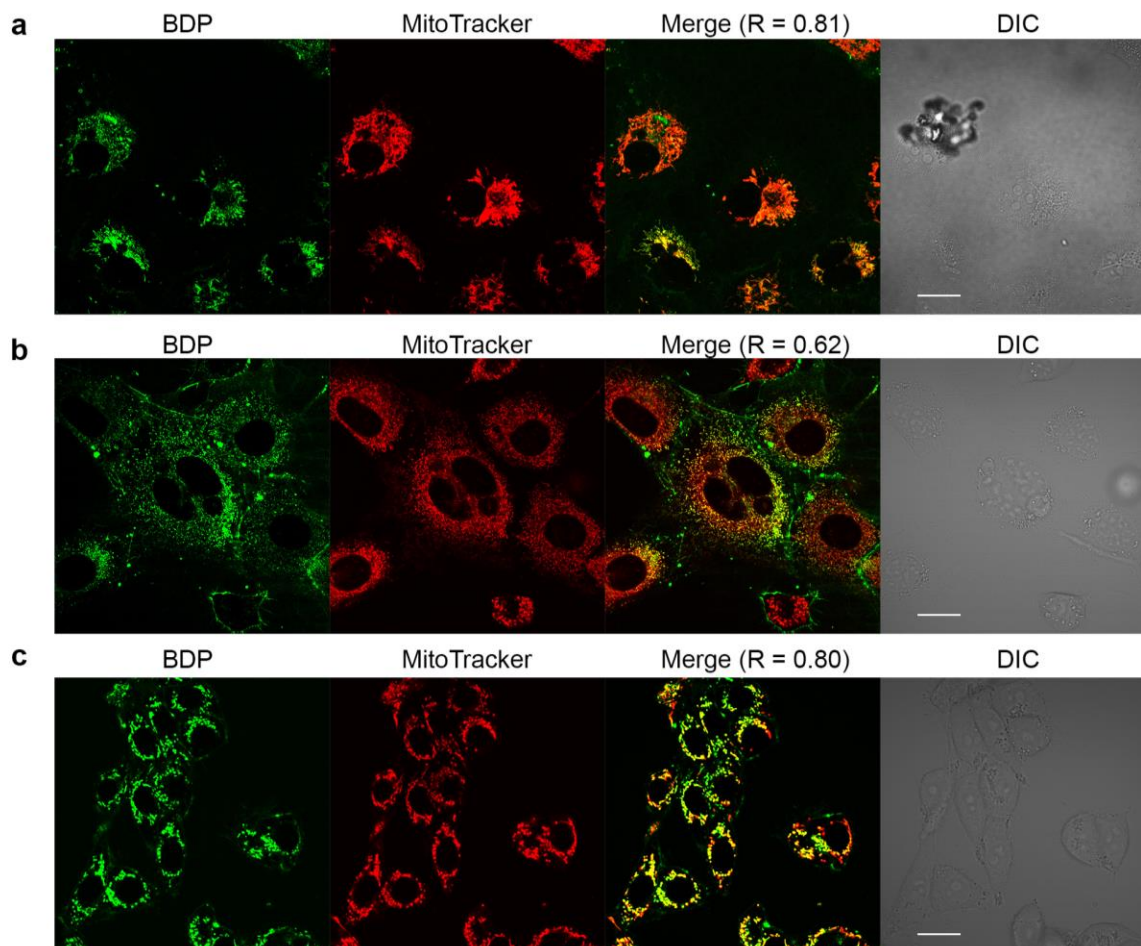

172

173 **Supplementary Fig. 14 | Confocal live cell imaging of BDP-WYneN10 (500 nM) and MitoTracker**  
 174 **Deep Red (100 nM) in cells.** Confocal live cell images of BDP (green channel), MitoTracker  
 175 Deep Red (red channel), merged and DIC (with a scale bar of 20  $\mu\text{m}$ ) were shown. Pearson's correlation coefficients  
 176 (R) were calculated from the average of five regions of interest (ROIs) in representative cells. **a**, Live cell  
 177 imaging of A549 cells. **b**, Live cell imaging of NIH3T3 cells. **c**, Live cell imaging of RKO cells.

178

179

180

181

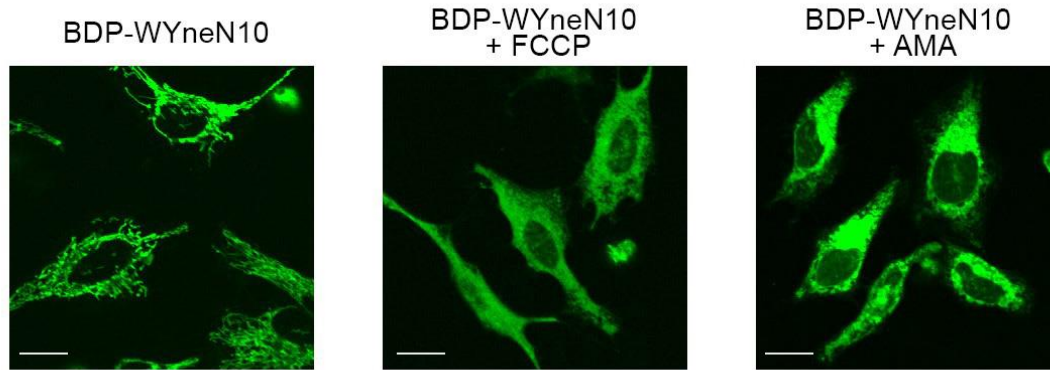

182

183 **Supplementary Fig. 15 | Effect of mitochondrial uncouplers on localization of BDP-WYneN10.**  
184 HeLa cells were incubated in DPBS, with FCCP (50  $\mu$ M) or antimycin A (AMA, 15  $\mu$ M) for 1 h at 37  $^{\circ}$ C,  
185 then treated with 1  $\mu$ M BDP-WYneN10 and live cell images were acquired after 15 min. Disruption of  
186 mitochondrial respiration resulted in poor localization of the fluorescent probe. A scale bar of 20  $\mu$ m is  
187 shown on each image.

188

189

190

191

192

193

194

195

196



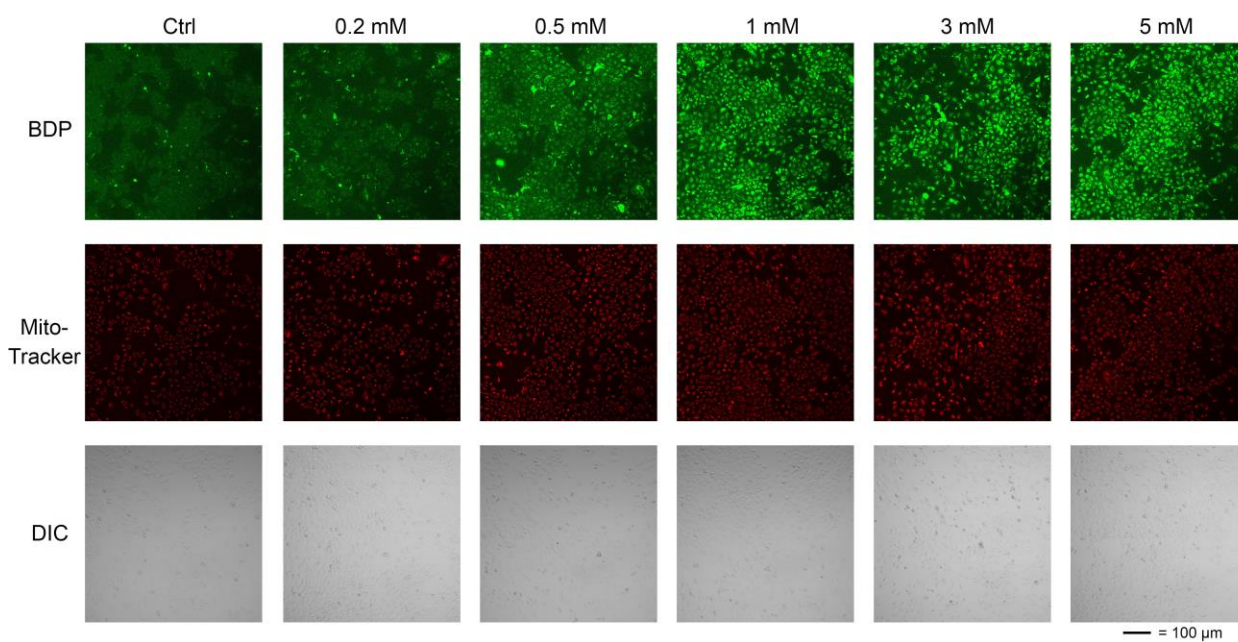

197

198 **Supplementary Fig. 16 | Effect of external H<sub>2</sub>O<sub>2</sub> on the fluorescence of BDP-WYneN10.** A549 cells  
199 were incubated with BDP-WYneN10 (1 μM) and MitoTracker Deep Red (0.1 μM) in DBPS, with various  
200 concentrations of H<sub>2</sub>O<sub>2</sub>. Live cell imaging was performed after 1 h. An increase in BODIPY fluorescence  
201 was observed along with increasing oxidant concentration, whereas the MitoTracker fluorescence stayed  
202 at a similar level.

203

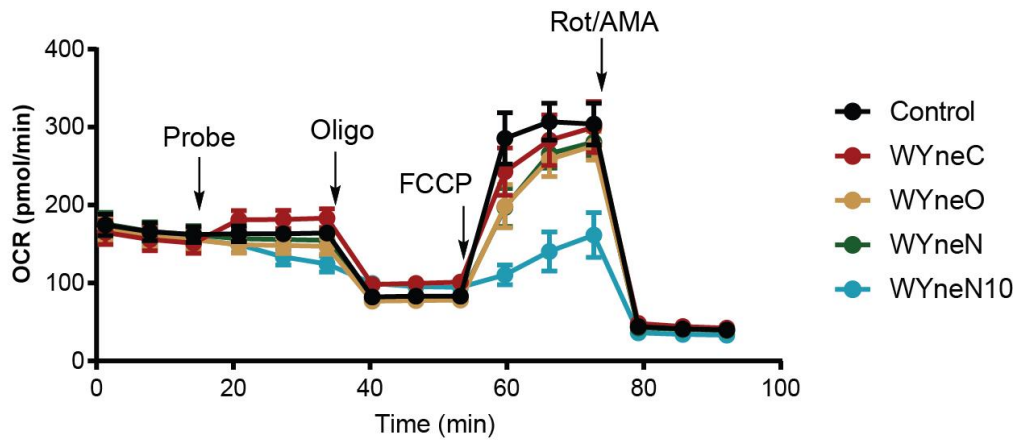

204

205 **Supplementary Fig. 17 | Effect of WYne probes on mitochondrial respiration.** Oxygen consumption  
 206 rates (OCR) were obtained on a Seahorse XF96 following manufacturer's protocol. A plate of 95%  
 207 confluent A549 cells in 180  $\mu$ L RPMI assay media were injected with the following compounds (12  
 208 replicates) in the order of: Port A: WYne probes (50  $\mu$ M final concentration). Port B: Oligomycin A (1.5  
 209  $\mu$ M). Port C: FCCCP (1.5  $\mu$ M). Port D: Antimycin A and rotenone (0.5  $\mu$ M each). Three cycles consisting  
 210 3 min mixing and 3 min measurements were performed after each addition.

211

212

213

214

215

216

217

218

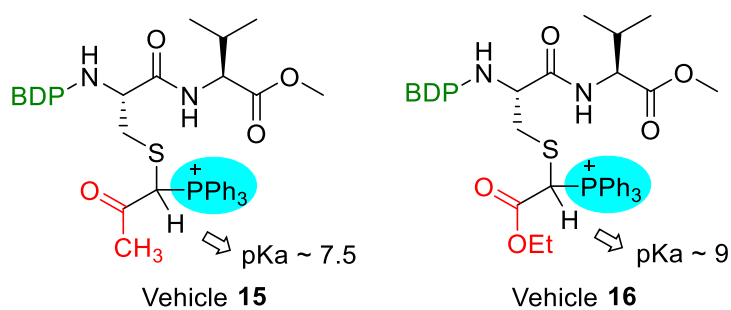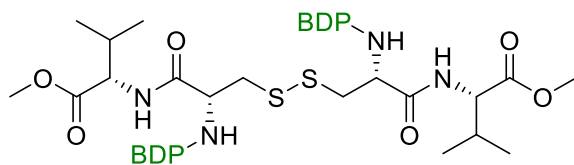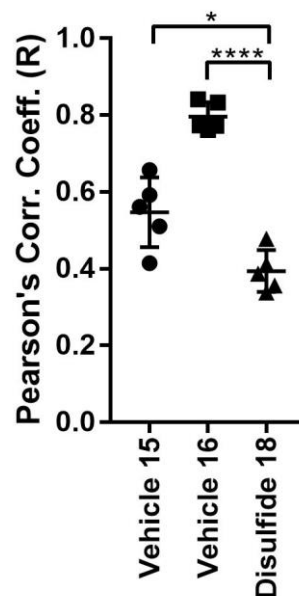

219

220 **Supplementary Fig. 18 | Structures of vectors 15 and 16, and a disulfide control compound 18,**  
 221 **and their colocalization with MitoTracker™ Deep Red FM.** Live cell images were acquired from HeLa  
 222 cells stained with BODIPY (BDP)-tagged probes (0.5  $\mu$ M) and MitoTracker (0.1  $\mu$ M) in DPBS. Pearson's  
 223 correlation coefficients were calculated from five regions of interest (ROIs). Statistical significance of  
 224 Pearson's correlation coefficients between the vehicle and the control was shown (unpaired t-test, \*  $P \leq$   
 225 0.05, \*\*\*\*  $P \leq 0.0001$ ).

226

227

228

229

230

231

232

233

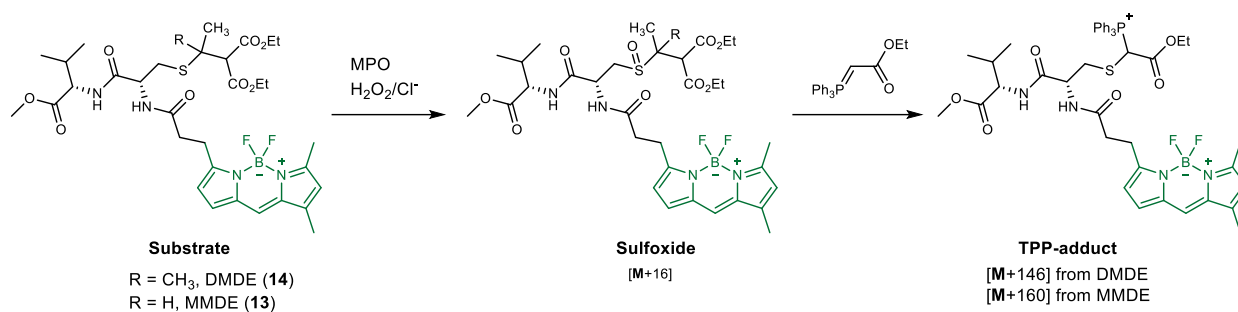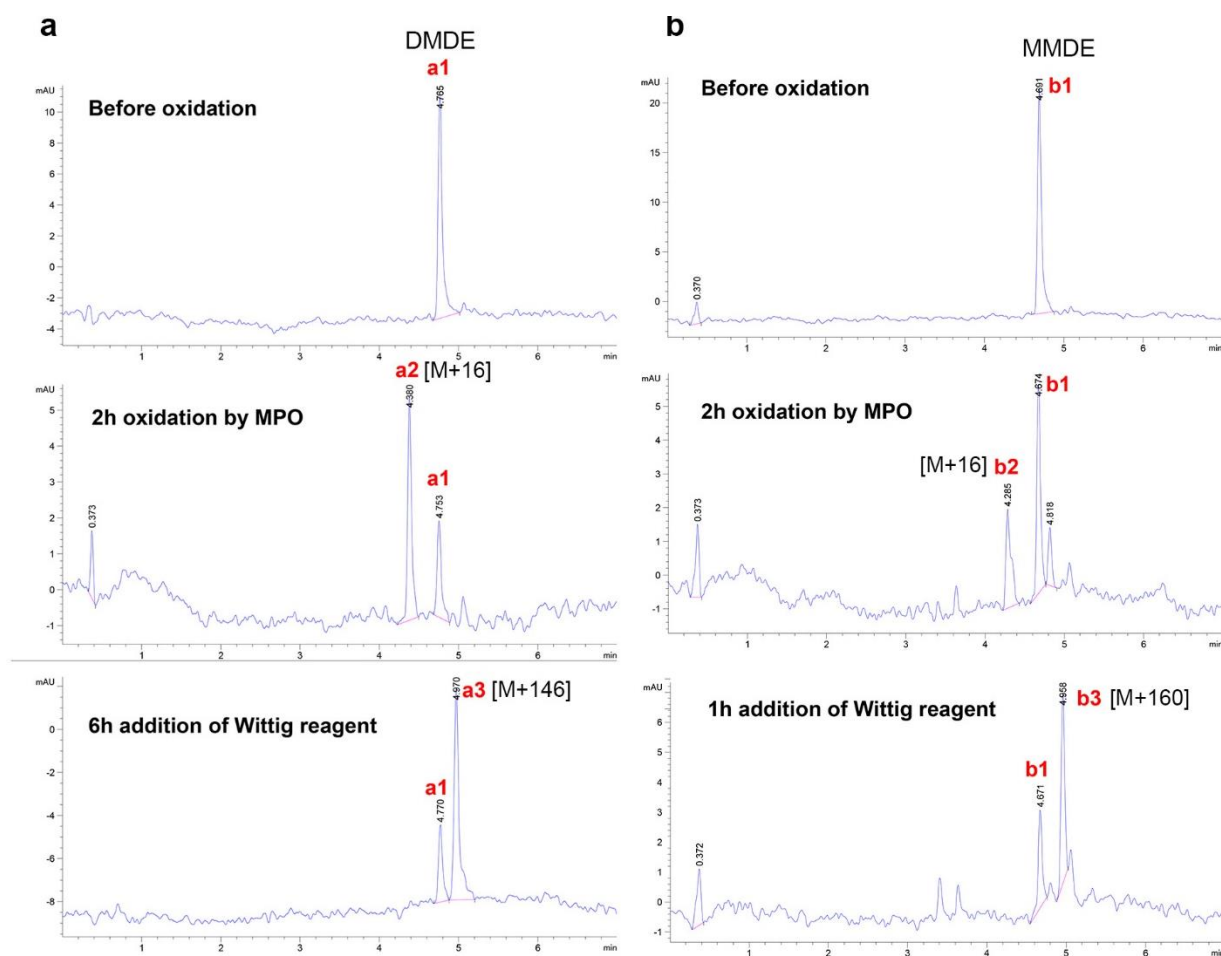

234

235 **Supplementary Fig. 19** | Enzymatic generation of HOCl triggered redox-decaging and TPP-conjugation  
 236 of a fluorescent dipeptide substrate. Myeloperoxidase produced HOCl which oxidized the substrates  
 237 DMDE or MMDE (5  $\mu$ M) in pH 7.4 PBS solution (0.1 mL). The resulting sulfoxide product reacted with  
 238 Wittig reagent in 1 h (MMDE, panel **a**) or 6 h (DMDE, panel **b**) at 37  $^{\circ}$ C. Reaction progresses were  
 239 monitored by LC-MS (absorption at 493 nm). LC peaks corresponding to DMDE (compound **14**, labeled  
 240 as “a1”), its sulfoxide (a2) and TPP-adduct (a3); and MMDE (compound **13**, labeled as “b1”), its sulfoxide  
 241 (b2) and TPP-adduct (b3) are labeled with corresponding mass shifts.

242

243

244

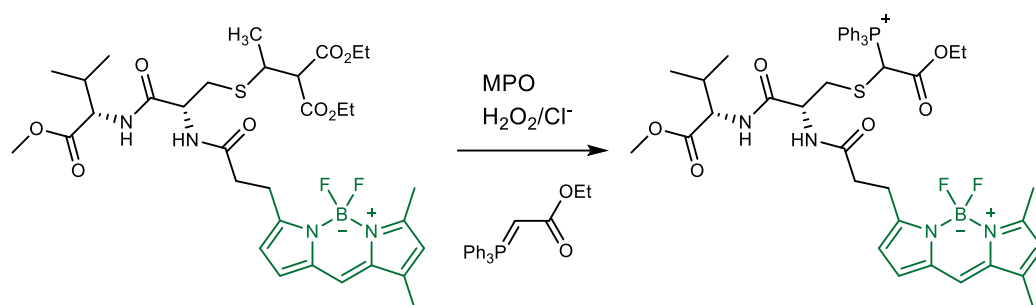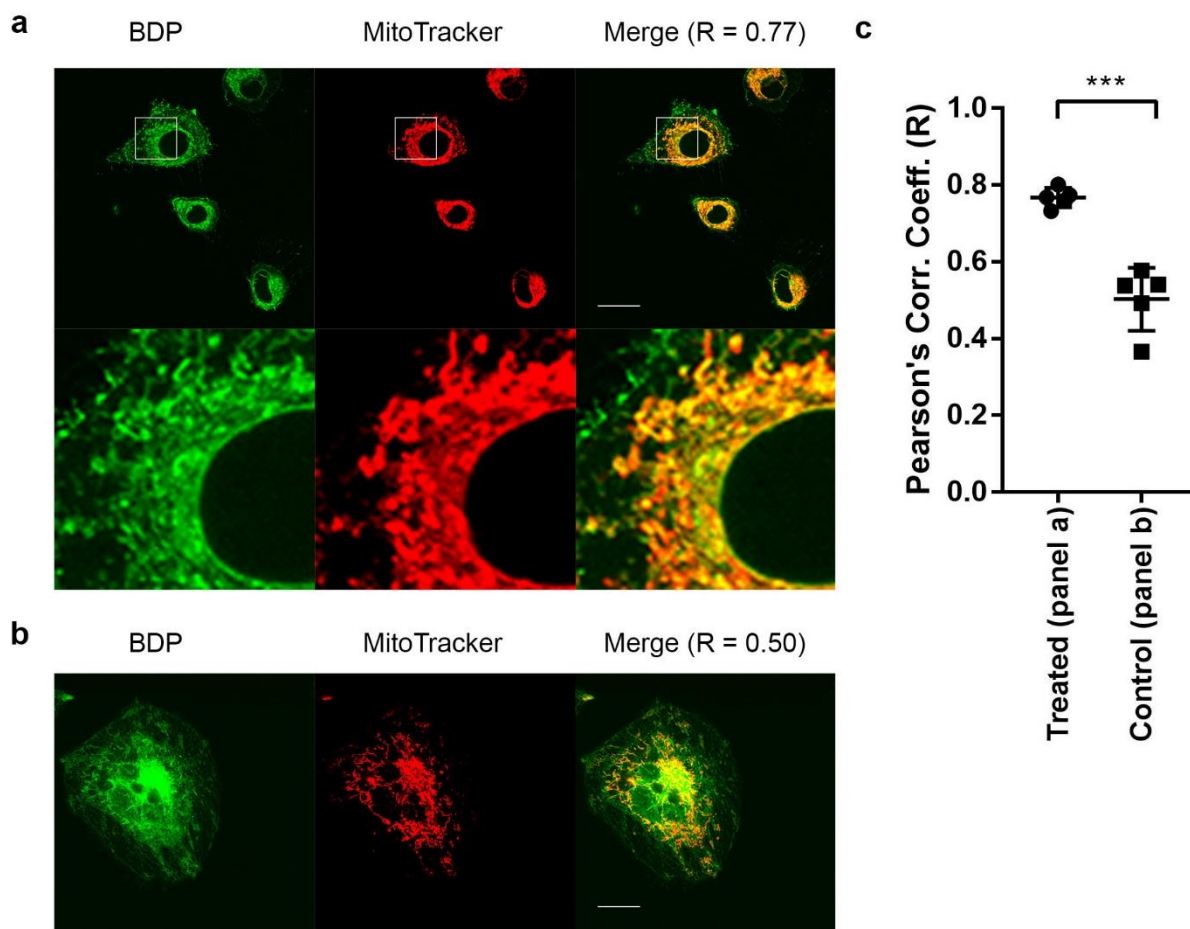

245

246 **Supplementary Fig. 20 | Enzymatic oxidative decaging of MMDE and in vivo delivery of a**  
 247 **fluorescent cargo to mitochondria.** HeLa cells in 8-well culture slides (ibidi  $\mu$ -slide) were incubated  
 248 with MMDE (0.2  $\mu$ M), Wittig-CO<sub>2</sub>Et (5  $\mu$ M), H<sub>2</sub>O<sub>2</sub> (1 mM) and myeloperoxidase (MPO, 0.15 mg/mL) in  
 249 DPBS containing MitoTracker Deep Red (50 nM). After 1 h incubation at 37 °C, live cells were imaged  
 250 under a confocal microscope. A scale bar of 20  $\mu$ m, and a zoom-in area of 20x20  $\mu$ m was shown.  
 251 Pearson's correlation coefficients (R) were calculated from the average of five regions of interest (ROIs)  
 252 in representative cells. **a**, Confocal images of HeLa cells after treatment. A scale bar of 20  $\mu$ m was added  
 253 on the merged image. **b**, Control experiment with the same setup excluding MPO. **c**, Statistical  
 254 significance of Pearson's correlation coefficients between the two experiments (unpaired t-test, P =  
 255 0.0001).

256

257

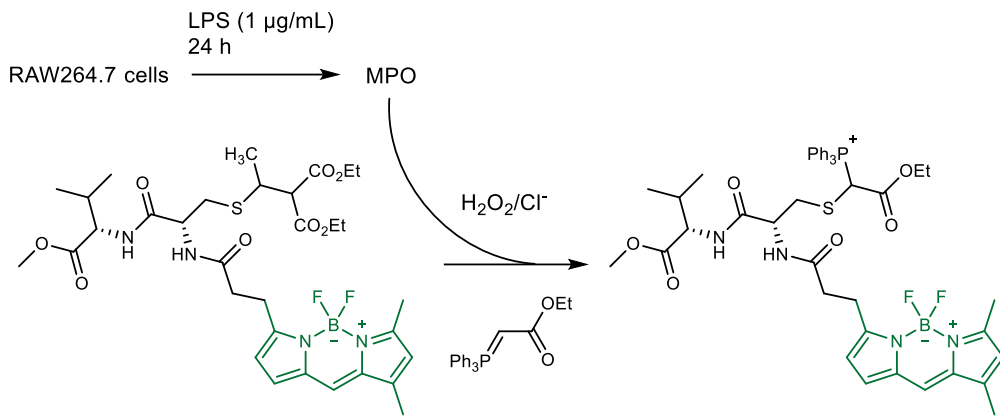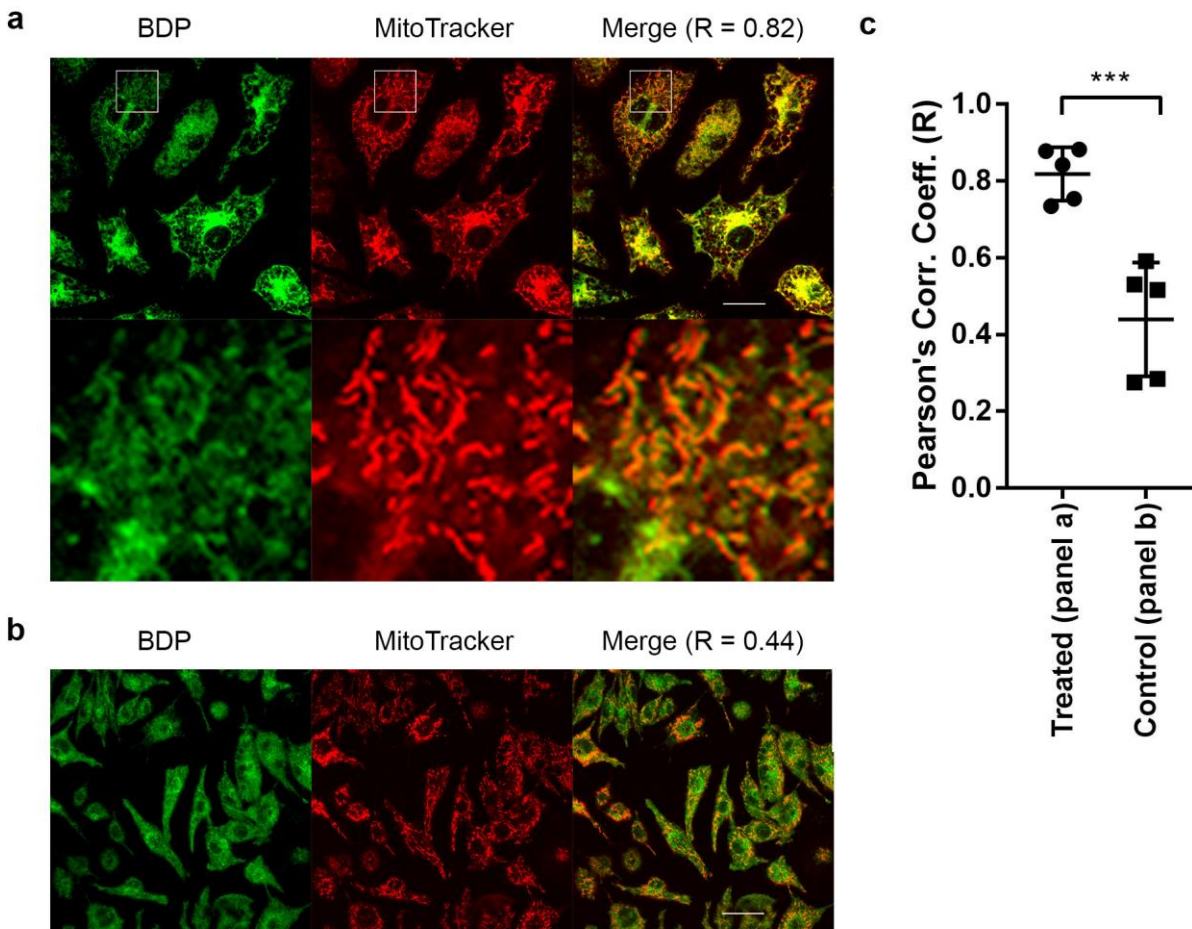

258

259 **Supplementary Fig. 21 | Oxidative decaging of MMDE and mitochondrial delivery in macrophage**  
 260 **cells.** RAW 264.7 cells were stimulated with 1  $\mu\text{g/mL}$  LPS for 24 h, then treated with MMDE (0.2  $\mu\text{M}$ ),  
 261 Wittig-CO<sub>2</sub>Et (5  $\mu\text{M}$ ) and H<sub>2</sub>O<sub>2</sub> (1 mM) in DPBS containing MitoTracker Deep Red (50 nM). After 1 h  
 262 incubation at 37 °C, live cells were imaged under a confocal microscope. A scale bar of 20  $\mu\text{m}$ , and a  
 263 zoom-in area of 20x20  $\mu\text{m}$  were shown. Pearson's correlation coefficients (R) were calculated from the  
 264 average of five regions of interest (ROIs) in representative cells. **a**, Confocal images of RAW 264.7 cells  
 265 after treatment. **b**, Control experiment without the Wittig reagent and H<sub>2</sub>O<sub>2</sub>. **c**, Statistical significance of  
 266 Pearson's correlation coefficients between the two experiments (unpaired t-test, P = 0.0008).

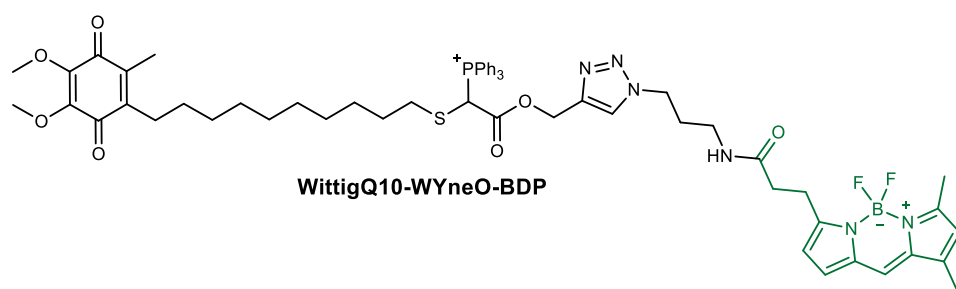

267

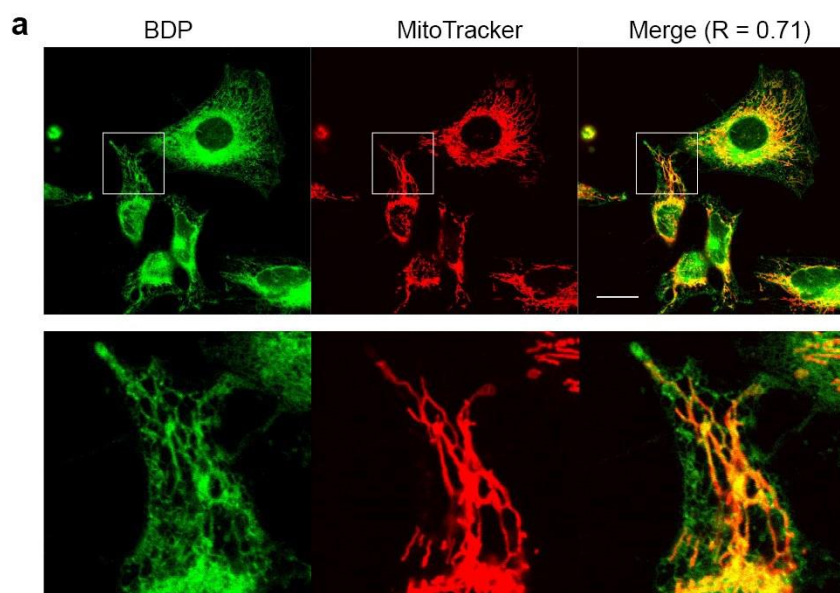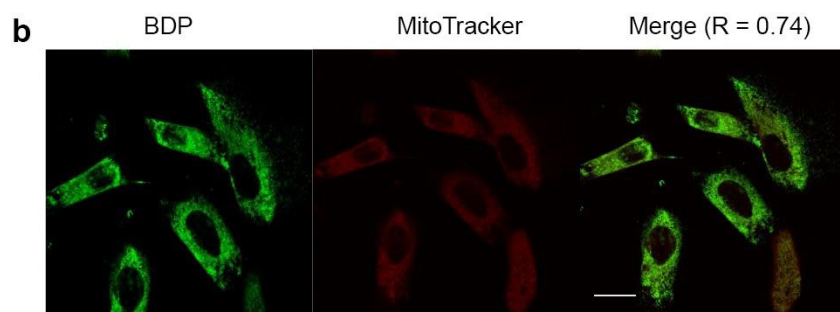

268

269 **Supplementary Fig. 22 | Live cell confocal imaging of WittigQ10-WYneO-BDP showed signs of**  
 270 **localization to mitochondria.** A scale bar of 20  $\mu\text{m}$ , and a zoom-in area of 30x30  $\mu\text{m}$  were shown.  
 271 Pearson's correlation coefficients (R) were calculated from the average of five regions of interest (ROIs)  
 272 in representative cells. **a**, HeLa cells were treated with 1  $\mu\text{M}$  of WittigQ10-WYneO-BDP (prepared via  
 273 click chemistry protocol and HPLC purified) and 50 nM of MitoTracker Deep Red in DPBS. **b**, HeLa cells  
 274 were pre-incubated with FCCP (50  $\mu\text{M}$ ) for 1 h and treated with the aforementioned probes in DPBS.

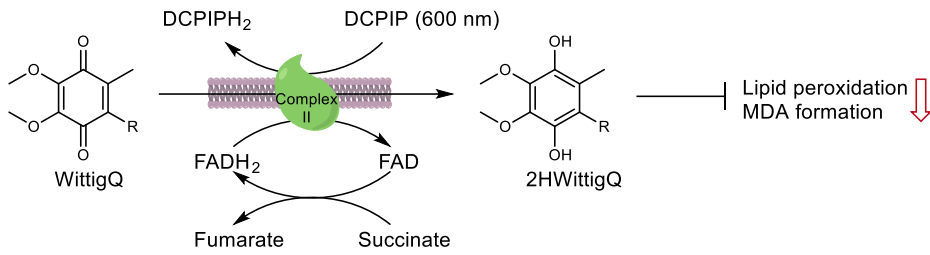

275

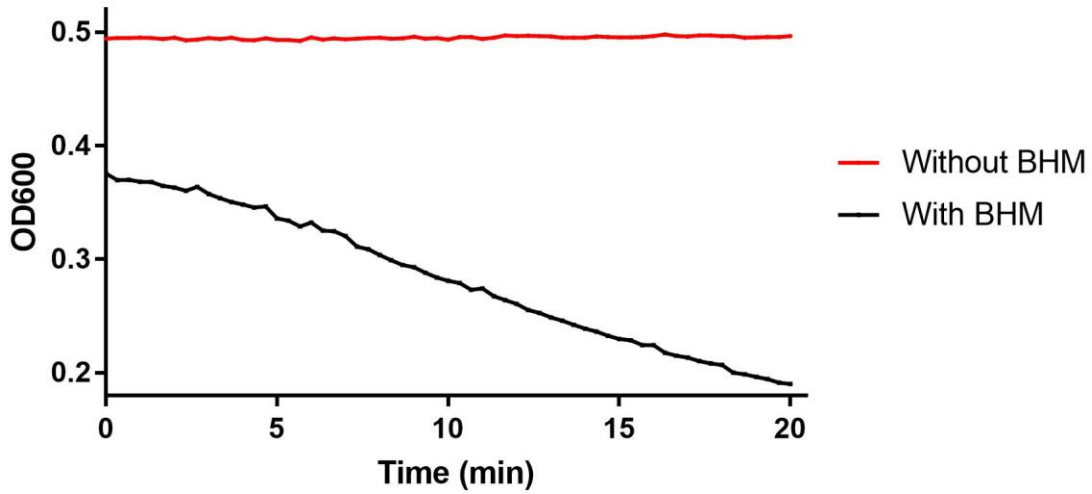

276

277 **Supplementary Fig. 23 | Mitochondrial complex II assay with WittigQ in presence of quinone**  
 278 **depleted bovine heart mitochondria (BHM) or control at 37 °C.** Complex II activity resulted in  
 279 reduction of WittigQ and a steady decrease in OD600. Detailed experimental procedure is described in  
 280 supplementary methods.  
 281

282

283

284

285

286

287



## Supplementary Methods

|     |                                                                               |    |
|-----|-------------------------------------------------------------------------------|----|
| 288 |                                                                               |    |
| 289 |                                                                               |    |
| 290 | SI 1. Reaction kinetics study .....                                           | 26 |
| 291 | SI 2. Cell culture and labeling .....                                         | 27 |
| 292 | SI 3. Click chemistry (CuAAC) .....                                           | 27 |
| 293 | SI 4. In-gel fluorescence .....                                               | 28 |
| 294 | SI 5. Inact protein mass spectrometry .....                                   | 28 |
| 295 | SI 6. Chemoproteomic workflow .....                                           | 29 |
| 296 | SI 7. Confocal microscopy .....                                               | 32 |
| 297 | SI 8. Redox-decaging and capture of sulfenic acids with Wittig reagents ..... | 33 |
| 298 | SI 9. Preparation of HeLa mitochondria .....                                  | 33 |
| 299 | SI 10. Assay of lipid peroxidation .....                                      | 34 |
| 300 | SI 11. Assay of complex II activity .....                                     | 34 |
| 301 |                                                                               |    |
| 302 |                                                                               |    |
| 303 |                                                                               |    |
| 304 |                                                                               |    |
| 305 |                                                                               |    |
| 306 |                                                                               |    |
| 307 |                                                                               |    |
| 308 |                                                                               |    |
| 309 |                                                                               |    |
| 310 |                                                                               |    |
| 311 |                                                                               |    |
| 312 |                                                                               |    |
| 313 |                                                                               |    |
| 314 |                                                                               |    |
| 315 |                                                                               |    |

316 **SI 1. Reaction kinetics study**

317

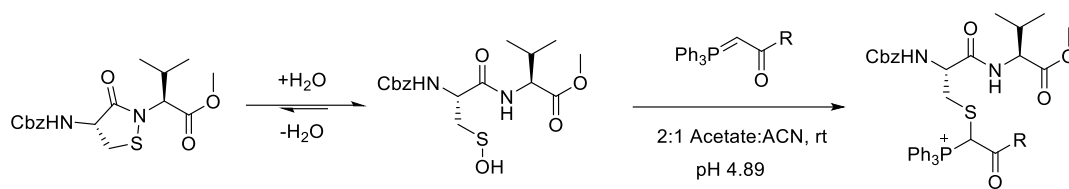

318 The rate studies measuring the reaction between nucleophiles with a model dipeptide-SOH were  
 319 performed as previously described (Gupta, V.; Carroll, K. S. *Chem. Sci.* **2016**, 7, 400). To a 2 mL solution  
 320 of a nucleophile in an appropriate buffer (10 mM PBS pH 7.4, or sodium acetate pH 4.9) was added 1  
 321 mL solution of cyclic sulfenamide (CSA) in acetonitrile. In order to obtain pseudo first-order kinetics, the  
 322 concentration of nucleophile was maintained at least 5 times higher than CSA. An aliquot (300  $\mu$ L) of the  
 323 reaction was collected at regular intervals (a total of 9 data points) and immediately quenched by addition  
 324 of formic acid (100  $\mu$ L). First order rate constant ( $k$ ) was obtained by plotting the UV peak area (Y-axis)  
 325 of the product against time (X-axis) and analyzing the plot using the “Dissociation - One phase  
 326 exponential decay” function in GraphPad Prism 7:

327

$$Y = (Y_0 - NS) \cdot e^{-kX} + NS$$

328 For initial survey of the reactivity of Wittig reagents, second-order rate constants ( $K$ ) was calculated from  
 329 first order rate constants ( $k$ ) and the concentration of nucleophiles ( $C$ ):

330

$$K = \frac{k}{C}$$

331 For WYne probes, second-order rate constant ( $K$ ) was obtained from the linear regression of first order  
 332 rate constants ( $k$ ) vs. concentrations of nucleophiles ( $C$ ):

333

$$k = K \cdot C + \text{intercept}$$

334

335 **SI 2. Cell culture and labeling**

336 A549, HeLa, RKO and NIH3T3 cells were sourced from ATCC. Cells were cultured in corresponding  
337 media (HeLa and RKO cells in EMEM; NIH3T3 cells in DMEM; A549 cells in RPMI-1640) supplemented  
338 with 10% (vol/vol) FBS (Invitrogen), maintained at 37 °C under 5% CO<sub>2</sub> humidified atmosphere.

339 For in situ labeling, cells at ~80% confluency were cultured in serum-free medium overnight, then  
340 switched to fresh serum-free medium containing vehicle (2% DMSO) or probes. After incubation for a  
341 certain period of time, cells were washed with cold PBS (3 mL x 4), then treated with HEPES lysis buffer  
342 (50 mM HEPES, 150 mM NaCl, pH 7.4, 1% NP-40 (Igepal CA-630), 0.5 % sodium deoxycholate, 0.1%  
343 SDS, with 1X freshly added protease inhibitor (Roche cOmplete™, EDTA-free Protease Inhibitor) and  
344 200 U/mL catalase). The flasks were kept on ice with occasional swirling for 10 min. The lysates were  
345 transferred to 1.5 mL Eppendorf tubes and cell debris were removed by centrifugation (16,000 x g, 15  
346 min). Protein concentration of the supernatant was determined by BCA assay (Thermo Scientific) and  
347 adjusted to an appropriate concentration (0.4-1.0 mg/mL) with HEPES buffer (50 mM HEPES, 150 mM  
348 NaCl, pH 7.4).

349

350 **SI 3. Click chemistry (CuAAC)**

351 To 89 µL alkyne-tagged lysate solutions were added: 2 µL azide reporter compound (e.g. TAMRA-N<sub>3</sub>, 5  
352 mM), 7 µL premixed CuSO<sub>4</sub>-BTTP (2 µL 12.5 mM CuSO<sub>4</sub>, 5 µL 10 mM BTTP) then 2 µL sodium ascorbate  
353 (125 mM). The Click reactions were rocked at room temperature for 1 h, then quenched with addition of  
354 1 µL EDTA (100 mM).

| Reagents for CuAAC   | Effective final concentration (µM) |
|----------------------|------------------------------------|
| TAMRA-N <sub>3</sub> | 100                                |
| CuSO <sub>4</sub>    | 250                                |
| BTTP                 | 500                                |
| Sodium ascorbate     | 2500                               |

355

356 For CuAAC of small molecules with BDP-FL-azide (Lumiprobe Inc.), reactions were performed in 1 mL  
357 DMSO-H<sub>2</sub>O (1:1 v/v) using a similar procedure as above. After reaction completion, the mixture was  
358 purified by prep-HPLC (5-100% ACN-H<sub>2</sub>O gradient) to afford BDP conjugates.

| <b>Reagents for CuAAC</b>     | <b>Effective final concentration (μM)</b> |
|-------------------------------|-------------------------------------------|
| <b>(small molecules)</b>      |                                           |
| <b>BDP-FL-azide</b>           | 200                                       |
| <b>Small molecule alkynes</b> | 1000                                      |
| <b>CuSO<sub>4</sub></b>       | 1000                                      |
| <b>BTTP</b>                   | 2000                                      |
| <b>Sodium ascorbate</b>       | 2500                                      |

359

360

#### 361 **SI 4. In-gel fluorescence**

362 After conjugation with TAMRA-N<sub>3</sub>, the labeled protein samples were mixed with non-reducing SDS  
363 sample buffer and separated by SDS-PAGE (4-20%), washed twice with water and MeOH-H<sub>2</sub>O-AcOH  
364 (4:5:1 v/v/v, 5 min per wash) and imaged (Azure Sapphire™ Biomolecular Imager) at 520 nm (TAMRA)  
365 and 658 nm (protein ladder), followed by staining (coomassie brilliant blue R-250) to ensure equal protein  
366 loading.

367

#### 368 **SI 5. Inact protein mass spectrometry**

369 Protein samples were buffer exchanged (50 mM ammonium bicarbonate, with Zeba™ Spin Desalting  
370 Columns (7k molecular weight cutoff, Thermo Scientific) and diluted with ammonium bicarbonate (50 mM)  
371 to a final concentration of 3 μM. 10 μL of each sample was separated by HPLC (GRACE VyDAC C4  
372 protein column, 50x4.6 mm, 5-100% ACN in H<sub>2</sub>O gradient) and analyzed by mass spectrometry (Thermo

373 Scientific LTQ Linear Ion Trap MS). Obtained mass spectra were deconvoluted using the MagTran  
374 software (Dr. Zhongqi Zhang, Amgen Inc., Thousand Oaks, CA).

375

## 376 **SI 6. Chemoproteomic workflow**

### 377 **SI 6.1 Cell culture and treatment**

378 A549 cells were purchased from the ATCC, cultured in DMEM supplemented with 10% FBS (Invitrogen), 1%  
379 penicillin-streptomycin (Invitrogen) and 1% Glutagro (Corning), maintained at 37°C in a 5% CO<sub>2</sub>  
380 humidified atmosphere. For H<sub>2</sub>O<sub>2</sub> treatment, cells were grown to ~80% confluency and subjected to  
381 serum-deprivation overnight. Then, cells were washed with fresh and pre-warmed serum-free medium  
382 and incubated with medium containing 1mM H<sub>2</sub>O<sub>2</sub> at 37°C for 15 min.

383

### 384 **SI 6.2 Chemoselective labeling the S-sulfenylome**

385 For *in vitro* labeling, A549 cells without stimuli were harvested, lysed in pre-chilled NETN buffer (50 mM  
386 HEPES (pH 7.6), 150 mM NaCl, and 1% IGEPAL) supplemented with 1 x protease and phosphatase  
387 inhibitors (Thermo Scientific, A32961) containing 200 unit/mL catalase (Sigma-Aldrich), and then  
388 incubated with 5 mM of the SOH-specific probe as indicated (WYneC, WYneO, WYneN, BTd, or DYn-2)  
389 at 37°C for 2 h with rotation and light protection. For *in situ* labeling, intact A549 cells treated with or  
390 without H<sub>2</sub>O<sub>2</sub> (1 mM, 15 min, 37°C) were incubated with 0.5 mM probe as indicated (WYneN, <sup>13</sup>C<sub>5</sub> WYneN,  
391 or BTd) at 37°C for 1 h and then were lysed with aforementioned NETN buffer.

392

### 393 **SI 6.3 Subsequent labeling of the nucleophilic cysteinome**

394 A549 cells labeled with <sup>13</sup>C<sub>5</sub> WYneN were harvested and lysed as described above. The same protein  
395 samples were then reduced with 10 mM TECP at room temperature (RT, 25°C) for 30 min to reduce

396 reversible oxidations other than sulfenic acids and subsequently labeled with 20 mM IPM, a 'clickable'  
397 thiol-reactive probe, at RT for 1 h.

398

#### 399 **SI 6.4 Preparing the probe-labeled protein samples**

400 The probe-labeled protein samples were incubated with 40 mM iodoacetamide at 37 °C for 1 h with light  
401 protection. To remove all the excess small molecules, proteins were then precipitated with a methanol-  
402 chloroform system (aqueous phase/methanol/chloroform, 4:4:1 (v/v/v)). The precipitated proteins were  
403 resuspended with 50 mM ammonium bicarbonate containing 0.2 M urea and digested with sequencing  
404 grade trypsin (Promega) at a 1:50 (enzyme/substrate) ratio overnight at 37°C. The tryptic digests were  
405 desalted with HLB extraction cartridges (Waters) and evaporated to dryness. For qualitative and  
406 radiometric analyses, dried peptides were resuspended in a water solution containing 30% acetonitrile  
407 (MeCN). For stoichiometric quantification, dried peptides were resuspended in a water solution containing  
408 50% MeCN. CuAAC reaction was then performed as described previously<sup>1</sup> by subsequently adding 1  
409 mM either light or heavy Azido-UV-biotin (1 µL of a 40 mM stock), 10 mM sodium ascorbate (4 µL of a  
410 100 mM stock), 1 mM TBTA (1 µL of a 50 mM stock, and 10 mM CuSO<sub>4</sub> (4 µL of a 100 mM stock). After  
411 2h incubation at RT, the light and heavy isotopic tagged samples were then mixed immediately following  
412 CuAAC reaction. The samples were cleaned by strong cation exchange (SCX) spin columns and then  
413 subject to the enrichment with streptavidin beads for 2 h at RT. Streptavidin beads were washed with 50  
414 mM NaAc (pH4.5), 50 mM NaAc containing 2 M NaCl (pH4.5), and deionized water twice each with  
415 vortexing and/or rotation to remove non-specific binding substances, then resuspended in 25 mM  
416 ammonium bicarbonate, transferred to glass tubes (VWR), and irradiated with 365 nm UV light (Entela,  
417 Upland, CA) for 2 h at RT with magnetic stirring. The supernatant was collected, dried under vacuum,  
418 and stored at -20°C until LC-MS/MS analysis.

419

#### 420 **SI 6.5 Liquid chromatography-tandem mass spectrometry (LC-MS/MS) analysis**

421 LC-MS/MS analyses were performed on a Q Exactive plus instrument (Thermo Fisher Scientific). Peptide  
422 samples were reconstituted in 0.1% formic acid and pressure-loaded onto a 2-cm microcapillary  
423 precolumn packed with C18 (3- $\mu$ m, 120 Å, SunChrom, USA) operated with an Easy-nLC1000 system  
424 (Thermo Fisher Scientific). The precolumn was connected to a 12-cm 150- $\mu$ m-inner diameter  
425 microcapillary analytical column packed with C18 (1.9- $\mu$ m, 120 Å, Dr. Maisch GebH, Germany) and  
426 equipped with a homemade electrospray emitter tip. The spray voltage was set to 2.0 kV and the heated  
427 capillary temperature to 320°C. LC gradient consisted of 0 min, 7% B; 14 min, 10% B; 51 min, 20% B;  
428 68 min, 30% B; 69-75 min, 95% B (A = water, 0.1% formic acid; B = MeCN, 0.1% formic acid) at a flow  
429 rate of 600 nL/min. MS1 spectra were recorded with a resolution of 70,000, an AGC target of 3e6, a max  
430 injection time of 20 ms, and a mass range from  $m/z$  300 to 1400. HCD MS/MS spectra were acquired  
431 with a resolution of 17,500, an AGC target of 1e6, a max injection time of 60 ms, a 1.6  $m/z$  isolation  
432 window and normalized collision energy of 30. Peptide  $m/z$  that triggered MS/MS scans were dynamically  
433 excluded from further MS/MS scans for 18 s.

434

#### 435 **SI 6.6 Peptide identification and quantification.**

436 For blind search, raw data files were searched against *Homo sapiens* Uniprot canonical database using  
437 DirecTag-TagRecon as previously described<sup>2,3</sup>. the maximum modification mass was 600 Da, precursor  
438 ion mass tolerance was 0.01 Da, and fragmentation tolerance was 0.1 Da. The blind search results were  
439 visualized and analyzed with IDPicker<sup>4</sup>.

440 For targeted search, raw data files were searched against *Homo sapiens* Uniprot canonical database  
441 using pFind studio<sup>5</sup>. Precursor ion mass and fragmentation tolerance were set as 10 ppm and 20 ppm,  
442 respectively. The maximum number of modifications and missed cleavages allowed per peptide were  
443 both set as three. For all analyses, mass shifts of + 15.9949 Da (methionine oxidation) and + 57.0214  
444 Da (iodoacetamide alkylation) were searched as variable modifications. For site-specific mapping of  
445 probe-modified SOH sites, mass shifts of + 511.202 (C<sub>30</sub>H<sub>30</sub>N<sub>3</sub>O<sub>3</sub>P, Intact) and +265.142  
446 (C<sub>13</sub>H<sub>19</sub>N<sub>3</sub>O<sub>3</sub>, cleaved) for WYneC, + 513.181 (C<sub>29</sub>H<sub>28</sub>N<sub>3</sub>O<sub>4</sub>P, intact) and +267.121 (C<sub>12</sub>H<sub>17</sub>N<sub>3</sub>O<sub>4</sub>,

447 cleaved) for WYneO, +512.197 (intact) and +252.122 (C<sub>11</sub>H<sub>16</sub>N<sub>4</sub>O<sub>3</sub>, cleaved) for WYneN, +418.131  
448 (C<sub>19</sub>H<sub>22</sub>N<sub>4</sub>O<sub>5</sub>S) for BTD, and +333.169 (C<sub>17</sub>H<sub>23</sub>N<sub>3</sub>O<sub>4</sub>) for DYn-2 were searched as variable  
449 modifications, respectively. For stoichiometric quantification of %SOH, mass shift of +252.122  
450 (C<sub>11</sub>H<sub>16</sub>N<sub>4</sub>O<sub>3</sub>, for both TPP-cleaved adduct derived from WYneN and the adduct derived from IPM) was  
451 searched as variable variable modification.

452 For qualitative and ratiometric analyses, a differential modification of 6.020 Da on probe-derived  
453 modification was used for stable-isotopic quantification. For stoichiometric analysis, a differential  
454 modification of 5.017 Da on probe-derived modification was used for stable-isotopic quantification. The  
455 FDRs were estimated by the program from the number and quality of spectral matches to the decoy  
456 database. The FDRs at spectrum, peptide, and protein level were < 1%. Quantitative analyses were  
457 performed using pQuant<sup>6</sup>, which calculates light to heavy ratios ( $R_{L/H}$ ) based on each identified MS scan  
458 with a 15 ppm-level *m/z* tolerance window and assigns an interference score (Int. Score) to each value  
459 from zero to one. The median values of probe-modified peptide ratios with  $\sigma$  less than or equal 0.5 were  
460 considered to calculate site-level ratios. Quantification results were obtained from two or four biological  
461 replicates.

462

### 463 **SI 7. Confocal microscopy**

464 Cells were cultured in 35 mm dishes (Ibidi  $\mu$ -Dish, cell culture treated) at 50-75% confluency. The media  
465 was replaced with DPBS (VWR, with Ca<sup>2+</sup> and Mg<sup>2+</sup>) containing fluorescent probes. After 10 min of  
466 incubation at 37 °C, live cell images were acquired on a confocal microscope (Olympus Fluoview 1000)  
467 with preset channel settings (FITC channel for BODIPY-containing probes; Cy5 channel for  
468 MitoTracker™ Deep Red). Pixel intensity and colocalization analysis were performed with the ImageJ  
469 software (Wayne Rasband, NIH).

470



471 **SI 8. Redox-caging and capture of sulfenic acids with Wittig reagents**

472 Redox-caged sulfenic acids (50  $\mu\text{M}$  in PBS, pH 7.4) was treated with HOCl (50  $\mu\text{M}$ , 1 eq.). Immediate  
473 formation of corresponding sulfoxide product was observed by LC-MS analysis. Wittig reagent (500  $\mu\text{M}$ ,  
474 1 eq.) was then added, and the solution was incubated at 37  $^{\circ}\text{C}$  for an indicated time and analyzed on  
475 LC-MS. Yield of the TPP-linked product was calculated based on the ratio of peak area (product/starting  
476 material) at 493 nm. Assumption was made that all BODIPY fluorescent compounds have the same molar  
477 extinction coefficient at 493 nm.

478 For myeloperoxidase (MPO)-induced generation of HOCl, recombinant human MPO (R&D Systems, 3174)  
479 was treated with 2 mM  $\text{H}_2\text{O}_2$  in PBS (0.1 mg/mL) for 2 h at 37  $^{\circ}\text{C}$ , then redox-caged sulfenic acids (5  $\mu\text{M}$ )  
480 and Wittig reagent (100  $\mu\text{M}$ , 20 eq.) was added succeedingly. The reactions were performed at 37  $^{\circ}\text{C}$   
481 and tracked by LC-MS (493 nm absorption).

482

483 **SI 9. Preparation of HeLa mitochondria**

484 HeLa cells from a 150 mm culture dish ( $2 \times 10^7$  cells) were washed and harvested (via scraping) in cold  
485 PBS. Fractionating of intact mitochondria was performed with the Mitochondria Isolation Kit for Cultured  
486 Cells (Thermo Scientific, 89874) with slight modification to manufacturer's protocol. In brief, at 4  $^{\circ}\text{C}$ ,  
487 pelleted cells were mixed with 700  $\mu\text{L}$  of Mitochondria Isolation Reagent A with 1X protease inhibitor  
488 (Roche) for 2 min, homogenized in a dounce tissue grinder, and mixed with 700  $\mu\text{L}$  of Mitochondria  
489 Isolation Reagent C with 1X protease inhibitor. Cell debris were removed by centrifugation at 700 x g for  
490 10 min. The supernatant was then centrifugated at 7,000 x g for 15 min to give pelleted mitochondria,  
491 which were washed with 500  $\mu\text{L}$  of Reagent C and centrifugated again at 12,000 x g for 15 min. The  
492 mitochondria pellet was resuspended in appropriate buffer and used immediately for further studies.

493

494 **SI 10. Assay of lipid peroxidation**

495 100 µL aliquots of intact HeLa mitochondria (0.5 mg protein/mL) in KCl buffer (100 mM KCl, 10 mM  
496 Tris·HCl, pH 7.6) was pre-treated with succinate (10 mM), rotenone (10 µM), and quinone antioxidant  
497 (MitoQ or WittigQ, at 20/10/5/2.5/0 µM in duplicate). After 30 min incubation at 37 °C, lipid peroxidation  
498 was induced by addition of FeSO<sub>4</sub> (50 µM), sodium ascorbate (150 µM) and H<sub>2</sub>O<sub>2</sub> (1 mM). After 40 min  
499 incubation at 37 °C, MDA assay solution (300 µL, Sigma-Aldrich MAK085) was added. The mixture was  
500 heated at 95 °C for 1 h, cooled to room temperature and analyzed on a fluorescence spectrometer (Ex/Em  
501 = 535/555 nm). Amount of MDA formed by lipid peroxidation was calculated from a standard curve, and  
502 plotted against the concentration of the antioxidant.

503

504 **SI 11. Assay of complex II activity**

505 Activity of mitochondrial complex II was assayed via a commercial kit (Cayman Chemical 700940).  
506 Bovine heart mitochondria (1 µL, kit provided) were added to 50 µL reaction mixture containing 100 µM  
507 WittigQ, 10 mM succinate, 10 µM rotenone, 1 mM KCN in KCl buffer (100 mM KCl, 10 mM Tris·HCl, pH  
508 7.6), then mixed with 2.5 % DCPIP solution (50 µL). OD600 was plotted over time on a plate reader at  
509 room temperature or 37 °C. Control experiment was performed in parallel without mitochondria.

510

511

512

513

514

515

516

517 **Synthetic Procedures**

518 **General** All reactions were conducted in flame-dried glassware under nitrogen pressure with dry solvents,  
519 unless otherwise noted. All chemicals were purchased from Sigma-Aldrich (St. Louis, MO), or Acros  
520 Organics (Fair Lawn, NJ) and used as received. Column chromatography was performed with silica gel  
521 P60 (Sorbent Technologies) on an automated flash chromatography system (CombiFlash Nextgen 300+).  
522 Reactions were monitored by thin layer chromatography (TLC) carried out using Analtech 60 F254 silica  
523 gel (precoated sheets, 0.25 mm thick). <sup>1</sup>H-NMR and <sup>13</sup>C-NMR spectra were collected in CDCl<sub>3</sub> or DMSO-  
524 d<sub>6</sub> (Cambridge Isotope Laboratories, Cambridge, MA) at 400 and 100 MHz respectively, using a Bruker  
525 AM-400 instrument with chemical shifts relative to residual CHCl<sub>3</sub> (7.26 and 77.16 ppm) or DMSO (2.50  
526 and 39.52 ppm). Low resolution mass spectroscopy analyses were carried out on an Agilent LC/MS  
527 system (Agilent 1220 HPLC with InfinityLab Poroshell 120 SB-C18 column and Agilent 6120 Quad MS).  
528 Preparative HPLC was performed on an Agilent 1260 HPLC system with ZORBAX SB-C18 column  
529 (21.2x150 mm) using a gradient of 5-100% acetonitrile in water. All HPLC solvents were supplied with  
530 0.1% (v/v) formic acid.

531

532 **Preparation of 1-(triphenylphosphaneylidene)hex-5-yn-2-one (8)**

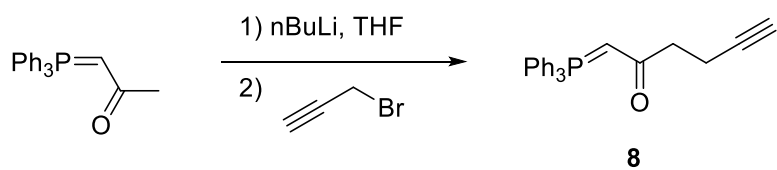

533

534 To an oven-dried and N<sub>2</sub>-flushed flask was added a solution of 1-(triphenylphosphoranylidene)-2-  
535 propanone (954 mg, 3.00 mmol) in dry THF (20 mL). The solution was cooled to -78 °C then *n*-BuLi (2.33  
536 mL, 1.8 M in hexane, 4.20 mmol) was slowly added and the resulting brown solution was stirred at -78 °C  
537 for 1 h. Then propargyl bromide (80 wt% in toluene, 400 μL, 4.20 mmol) was added and the solution was  
538 slowly warmed to room temperature and stirred overnight. Solvent was removed *in vacuo* and the mixture  
539 was diluted in DCM (30 mL), washed with water (20 mL x 3), dried (Na<sub>2</sub>SO<sub>4</sub>) and concentrated *in vacuo*.

540 The crude product was purified by flash chromatography (1-5% MeOH in DCM) and further purified by  
541 prep-HPLC (5-100% ACN in H<sub>2</sub>O) to afford the title product as a white solid (557.1 mg, 1.56 mmol, 52%  
542 yield). **<sup>1</sup>H NMR** (400 MHz, CDCl<sub>3</sub>) δ 7.50 (m, 15H), 3.75 (d, *J* = 25.0 Hz, 1H), 2.55 (m, 4H), 1.95 (m, 1H).  
543 **<sup>13</sup>C NMR** (100 MHz, CDCl<sub>3</sub>) δ 190.71 (d, *J* = 2.2 Hz), 133.09 (d, *J* = 10.2 Hz), 132.06 (d, *J* = 2.9 Hz),  
544 128.84 (d, *J* = 12.0 Hz), 127.01 (d, *J* = 90.3 Hz), 85.34, 67.81, 51.59 (d, *J* = 107.4 Hz), 39.90 (d, *J* = 15.8  
545 Hz), 15.93. **MS** (ESI) Calculated for C<sub>24</sub>H<sub>22</sub>OP [M+H<sup>+</sup>] 357.1; observed 357.2

546

### 547 Preparation of prop-2-yn-1-yl 2-(triphenylphosphaneylidene)acetate (**9**)

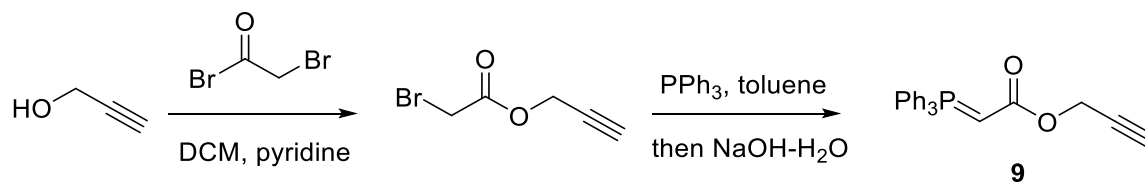

549 **Step 1:** To a solution of propargyl alcohol (58 μL, 1.0 mmol) and pyridine (81 μL, 1.0 mmol) in DCM (10  
550 mL) at 0 °C, bromoacetyl bromide (87 μL, 1.0 mmol) was added dropwise. The reaction mixture was  
551 stirred at 0 °C for 20 min then warmed to room temperature and stirred for 30 min. After that, water (15  
552 mL) was added and the mixture was extracted with DCM (10 mL x 3). The combined organic layers were  
553 dried (Na<sub>2</sub>SO<sub>4</sub>) and concentrated *in vacuo*.

554 **Step 2:** The crude bromoacetyl ester above was dissolved in 3 mL toluene, and slowly added into a  
555 solution of triphenylphosphine (262 mg, 1.0 mmol) in toluene (3 mL). The mixture was stirred at room  
556 temperature overnight. The white precipitate was filtered, washed with toluene (10 mL) and hexane (10  
557 mL), and taken in water (10 mL). NaOH (2 M) was added until the pH of the solution reached 8-9. The  
558 mixture was extracted with DCM (10 mL x 3), dried (Na<sub>2</sub>SO<sub>4</sub>) and concentrated to give the title product  
559 as a yellow oil (282 mg, 79 % in two steps). **<sup>1</sup>H NMR** (400 MHz, DMSO-d<sub>6</sub>) δ 7.58 (m, 15H), 4.46 (d, *J* =  
560 2.4 Hz, 2H), 3.32 (t, *J* = 2.5 Hz, 1H), 2.85 (d, *J* = 21.9 Hz, 1H). **<sup>13</sup>C NMR** (100 MHz, DMSO-d<sub>6</sub>) δ 168.95  
561 (d, *J* = 15.0 Hz), 132.55 (d, *J* = 10.1 Hz), 132.33 (d, *J* = 2.8 Hz), 129.02 (d, *J* = 11.9 Hz), 126.91 (d, *J* =

562 91.5 Hz), 80.94, 75.64, 48.82 (d,  $J = 3.5$  Hz), 29.14 (d,  $J = 127.6$  Hz). **MS** (ESI) Calculated for  $C_{23}H_{20}O_2P$   
563  $[M+H^+]$  359.1; observed 359.0.

564

565 **Preparation of (2-oxo-2-(prop-2-yn-1-ylamino)ethyl)triphenylphosphonium bromide (10)**

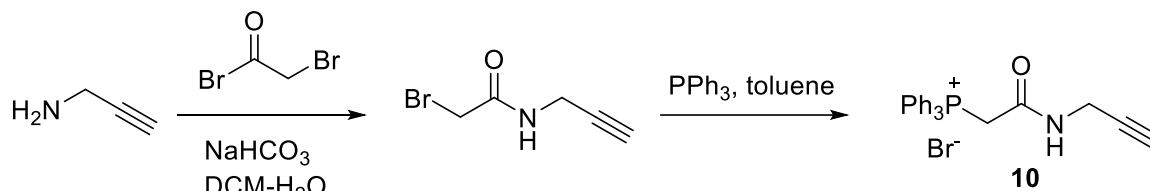

567 **Step 1:** Propargylamine (0.30 g, 5.45 mmol) was dissolved in 10 mL DCM and 10 mL  $NaHCO_3$  (sat'd aq.  
568 soln.). The mixture was vigorously stirred at  $-10$  °C and bromoacetyl bromide (0.7 mL, 8.17 mmol) was  
569 slowly added. The mixture was slowly warmed to rt and stirred for 3 h. DCM was removed *in vacuo* and  
570 the mixture was extracted with EtOAc (10 mL x 3). The combined organic layers were washed with sat'd  
571  $NaHCO_3$ , 1 M HCl and brine (20 mL each), dried ( $Na_2SO_4$ ) and concentrated to afford the  
572 bromoacetamide compound as an off-white solid.

573 **Step 2:** Part of the crude bromoacetamide compound above (176 mg) was treated with  $PPh_3$  (262 mg,  
574 1.0 mmol) in toluene (5 mL) overnight. The precipitate was filtered, washed with toluene (10 mL) and  
575 hexane (10 mL). The precipitate was purified by flash chromatography (1-7% MeOH in DCM), followed  
576 by prep-HPLC purification (5-100% ACN in  $H_2O$ ) to afford the title compound as a white powder (352 mg,  
577 0.804 mmol, 80% yield).  **$^1H$  NMR** (400 MHz,  $DMSO-d_6$ )  $\delta$  9.01 (m, 1H), 7.83 (m, 15H), 5.03 (d,  $J = 15.0$   
578 Hz, 2H), 3.81 (dd,  $J = 5.5, 2.6$  Hz, 2H), 3.16 (m, 1H).  **$^{13}C$  NMR** (100 MHz,  $DMSO-d_6$ )  $\delta$  162.67 (d,  $J = 4.6$   
579 Hz), 134.86 (d,  $J = 3.2$  Hz), 133.73 (d,  $J = 10.4$  Hz), 130.06, 118.65 (d,  $J = 88.7$  Hz), 79.75, 73.63, 30.97  
580 (d,  $J = 58.0$  Hz), 28.47. **MS** (ESI) Calculated for  $C_{23}H_{21}NOP$   $[M^+]$  358.1; observed 358.2.

581

582

583



598 **Step 3:**  $^{13}\text{C}_2$ -bromoacetic acid (170 mg, 1.2 mmol) was dissolved in dry DCM (5 mL) with catalytic DMF  
599 (20  $\mu\text{L}$ ). Oxalyl chloride (2.4 mmol) was slowly added while stirring at room temperature. After 1 h,  
600 volatiles were removed *in vacuo* to afford the crude acid chloride which was used immediately in the next  
601 step.

602 **Step 4:**  $^{13}\text{C}_3$ -propargylamine hydrochloride (127 mg, 1.35 mmol) was dissolved in 5 mL DCM and 5 mL  
603  $\text{NaHCO}_3$  (sat'd aqueous solution) and cooled to 0  $^\circ\text{C}$ . The acid chloride above (1.2 mmol) in dry DCM (5  
604 mL) was added dropwise. The reaction mixture was slowly warmed to rt and stirring was continued for  
605 30 min. The mixture was diluted with sat'd  $\text{NaHCO}_3$  (10 mL) and extracted with DCM (15 mL x 3). After  
606 drying ( $\text{Na}_2\text{SO}_4$ ), the organic layer was concentrated and purified by flash chromatography (10-40%  
607 EtOAc in hexane gradient) to afford the amide product as a white solid (74.0 mg, 0.41 mmol, 34% yield).

608 **Step 5:** The purified  $^{13}\text{C}_5$ -amide above (0.41 mmol) and triphenylphosphine (107 mg, 0.41 mmol) was  
609 taken in toluene (5 mL). The mixture was stirred at room temperature overnight. After removal of solvent  
610 *in vacuo*, the white precipitate was washed with cold ether (1 mL x 5), then purified by flash  
611 chromatography (1-7% MeOH in DCM) to afford the title product **heavy-10** as a white solid (104.5 mg,  
612 0.236 mmol, 58% yield).  **$^1\text{H}$  NMR** (400 MHz,  $\text{DMSO-d}_6$ )  $\delta$  8.93 (brs, 1H), 7.88 (m, 3H), 7.75 (m, 12H),  
613 5.13 (dd,  $J = 14.9, 6.2$  Hz, 1H), 4.80 (dd,  $J = 14.9, 6.2$  Hz, 1H), 3.99 (m, 1H), 3.65 (m, 1H), 3.16 (ddq,  $J$   
614 = 244, 54.7, 2.6 Hz, 1H).  **$^{13}\text{C}$  NMR** (100 MHz,  $\text{DMSO-d}_6$ )  $\delta$  162.72 (d,  $J = 48.2$  Hz), 134.87, 133.74 (d,  $J$   
615 = 10.6 Hz), 130.01 (d,  $J = 13.0$  Hz), 118.69 (d,  $J = 89.4$  Hz), 79.90 (dd,  $J = 169.1, 71.0$  Hz), 73.46 (dd,  $J$   
616 = 169.0, 13.3 Hz), 30.90 (dd,  $J = 58.1, 49.4$  Hz), 28.46 (dd,  $J = 70.9, 13.3$  Hz). **MS** (ESI) Calculated for  
617  $^{12}\text{C}_{18}^{13}\text{C}_5\text{H}_{21}\text{NOP}$  [ $\text{M}^+$ ] 363.1; observed 363.2.

618

619

620

621

622

623 **Preparation of WYneN10 (11):**

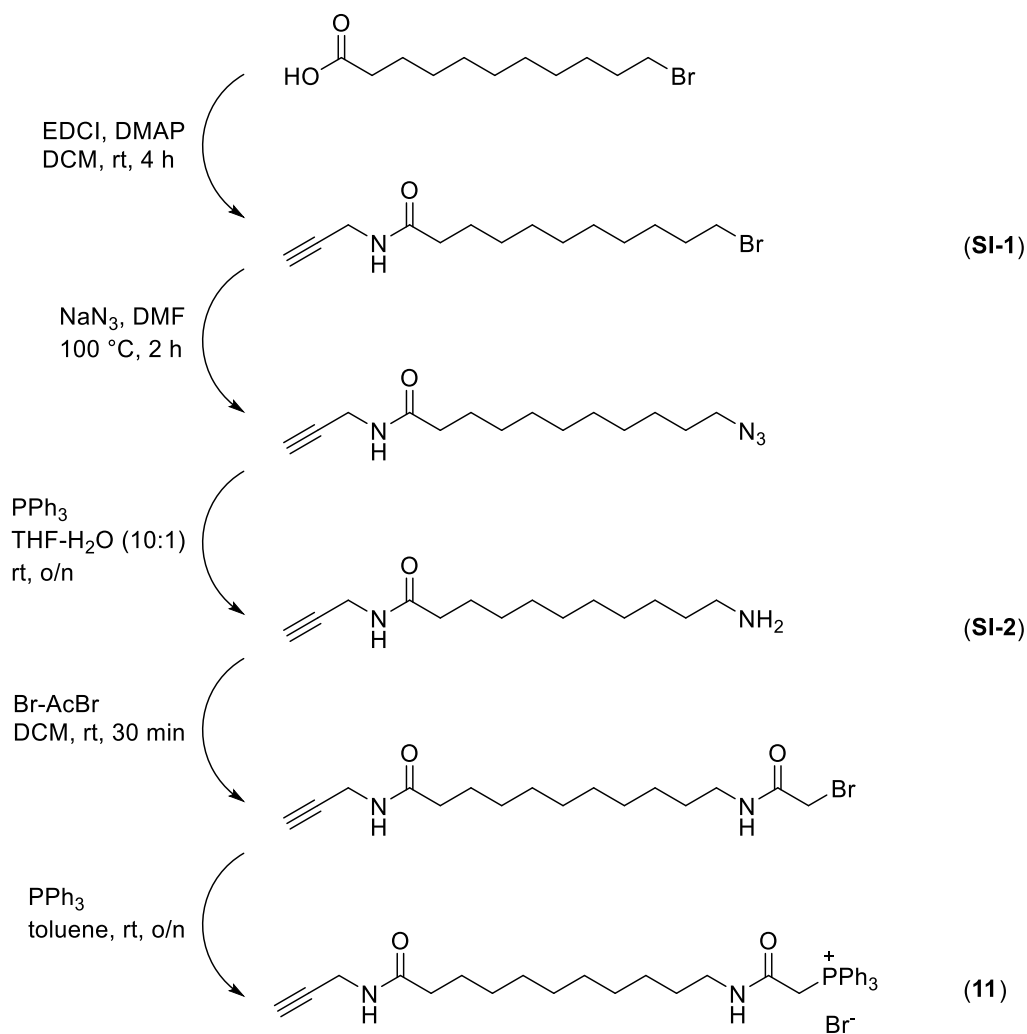

624

625 **Preparation of 11-bromo-N(prop-2-yn-1-yl)undecanamide (SI-1):**

626 To a solution of 11-bromoundecanoic acid (1.00 g, 3.77 mmol) and propargylamine (256  $\mu\text{L}$ , 4.00 mmol)  
 627 in dry DCM (10 mL) was added EDCI (767 mg, 4.00 mmol) and DMAP (48.8 mg, 0.40 mmol). The mixture  
 628 was stirred at room temperature for 4 h. After concentration *in vacuo*, the residue was purified by flash  
 629 chromatography (5-20% EtOAc in hexane) to afford the title compound as a white solid (0.95 g, 3.14  
 630 mmol, 85 % yield).  $^1\text{H NMR}$  (400 MHz,  $\text{CDCl}_3$ )  $\delta$  5.65 (brs, 1H), 4.06 (dd,  $J = 5.3, 2.6$  Hz, 2H), 3.41 (t,  $J$   
 631 = 6.9 Hz, 2H), 2.24 (t,  $J = 2.6$  Hz, 1H), 2.20 (m, 2H), 1.85 (m, 2H), 1.64 (m, 2H), 1.42 (m, 2H), 1.29 (m,  
 632 10H).  $^{13}\text{C NMR}$  (100 MHz,  $\text{CDCl}_3$ )  $\delta$  173.07, 79.77, 76.85, 71.49, 36.45, 34.10, 32.86, 29.39, 29.32, 29.26,



633 29.18, 28.77, 28.19, 25.60. **MS** (ESI) Calculated for C<sub>14</sub>H<sub>25</sub>BrNO [M+H<sup>+</sup>] 302.1, 304.1; observed 302.1,  
634 304.1.

635

#### 636 **Preparation of 11-amino-N-(prop-2-yn-1-yl)undecanamide (SI-2)**

637 The product above (377.5 mg, 1.25 mmol) was dissolved in DMF and NaN<sub>3</sub> (163 mg, 2.5 mmol) was  
638 added. The mixture was heated to 100 °C with stirring in a sealed tube filled with N<sub>2</sub>. After 2 h, the mixture  
639 was diluted with water (20 mL) and extracted with DCM (20 mL x 3). The combined organic layers were  
640 washed with brine and dried (Na<sub>2</sub>SO<sub>4</sub>) to afford the crude azido compound as a white solid (301.0 mg,  
641 1.23 mmol), which was dissolved in THF (5 mL) and H<sub>2</sub>O (0.5 mL). Triphenylphosphine (655 mg, 2.5  
642 mmol) was added, and the solution was stirred at room temperature overnight. After concentrating *in*  
643 *vacuo*, the precipitate was washed several times in cold EtOAc to afford the title compound as a white  
644 solid (194.1 mg, 0.816 mmol, 65% yield in two steps). **<sup>1</sup>H NMR** (400 MHz, Methanol-d<sub>4</sub>) δ 3.94 (s, 2H),  
645 3.04 (t, *J* = 7.1 Hz, 1H), 2.61 (t, *J* = 7.2 Hz, 2H), 2.19 (t, *J* = 7.5 Hz, 2H), 1.60 (t, *J* = 7.0 Hz, 2H), 1.45 (t,  
646 *J* = 7.1 Hz, 2H), 1.31 (m, 12H). **<sup>13</sup>C NMR** (100 MHz, Methanol-d<sub>4</sub>) δ 175.92, 80.32, 71.80, 42.65, 36.83,  
647 34.00, 30.64, 30.60, 30.55, 30.40, 30.21, 29.34, 28.05, 26.87. **MS** (ESI) Calculated for C<sub>14</sub>H<sub>27</sub>N<sub>2</sub>O [M+H<sup>+</sup>]  
648 239.2; observed 239.2.

649

#### 650 **Preparation of (2-oxo-2-((11-oxo-11-(prop-2-yn-1-ylamino)undecyl)amino)ethyl)Triphenyl-** 651 **phosphonium bromide (11)**

652 Compound **SI-2** (22 mg, 0.092 mmol) was dissolved in dry DCM (1 mL) and treated with DIPEA (20 μL,  
653 0.115 mmol) and bromoacetyl bromide (10 μL, 0.115 mmol). After 30 min, the mixture was diluted in brine  
654 (10 mL) and extracted with DCM (10 mL x 3). The organic layers were combined, dried (Na<sub>2</sub>SO<sub>4</sub>) and  
655 concentrated *in vacuo* to afford the crude product as a yellow oil (20.7 mg, 0.058 mmol, 63%). The yellow  
656 oil above (20.7 mg, 0.058 mmol) was taken in toluene (1 mL) and treated with triphenylphosphine (30.4  
657 mg, 0.115 mmol). After stirring overnight at rt, the mixture was concentrated and dissolved in H<sub>2</sub>O-ACN

658 (2 mL + 2 mL). The title compound **11** was obtained by HPLC purification (5-100% ACN in H<sub>2</sub>O, eluted  
659 at 18-20 min) followed by lyophilization: (yield calculated as bromide salt) 12.3 mg, 0.020 mmol, 34 %  
660 yield). **<sup>1</sup>H NMR (400 MHz, DMSO-d<sub>6</sub>)** δ 9.53 (brs, 1H), 8.33 (brs, 1H), 7.78 (m, 15H), 5.07 (brs, 2H), 3.82  
661 (dd, J = 5.5, 2.5 Hz, 2H), 3.06 (t, J = 2.5 Hz, 1H), 2.93 (q, J = 6.3 Hz, 2H), 2.07 (t, J = 7.4 Hz, 2H), 1.47  
662 (m, 2H), 1.22 (m, 14H). **<sup>13</sup>C NMR (100 MHz, DMSO-d<sub>6</sub>)** δ 171.90, 171.90, 134.64, 134.61, 133.83, 133.72,  
663 129.90, 129.77, 81.39, 72.66, 39.02, 35.03, 28.88, 28.83, 28.73, 28.61, 28.60, 28.58, 27.67, 26.20, 25.11.  
664 **MS** (ESI) Calculated for C<sub>34</sub>H<sub>42</sub>N<sub>2</sub>O<sub>2</sub>P [M<sup>+</sup>] 541.3; observed 541.3.

665

666

667

668

669

670

671

672

673

674

675

676

677

678

679

680 **Preparation of redox-caged sulfenic acids 12-14:**

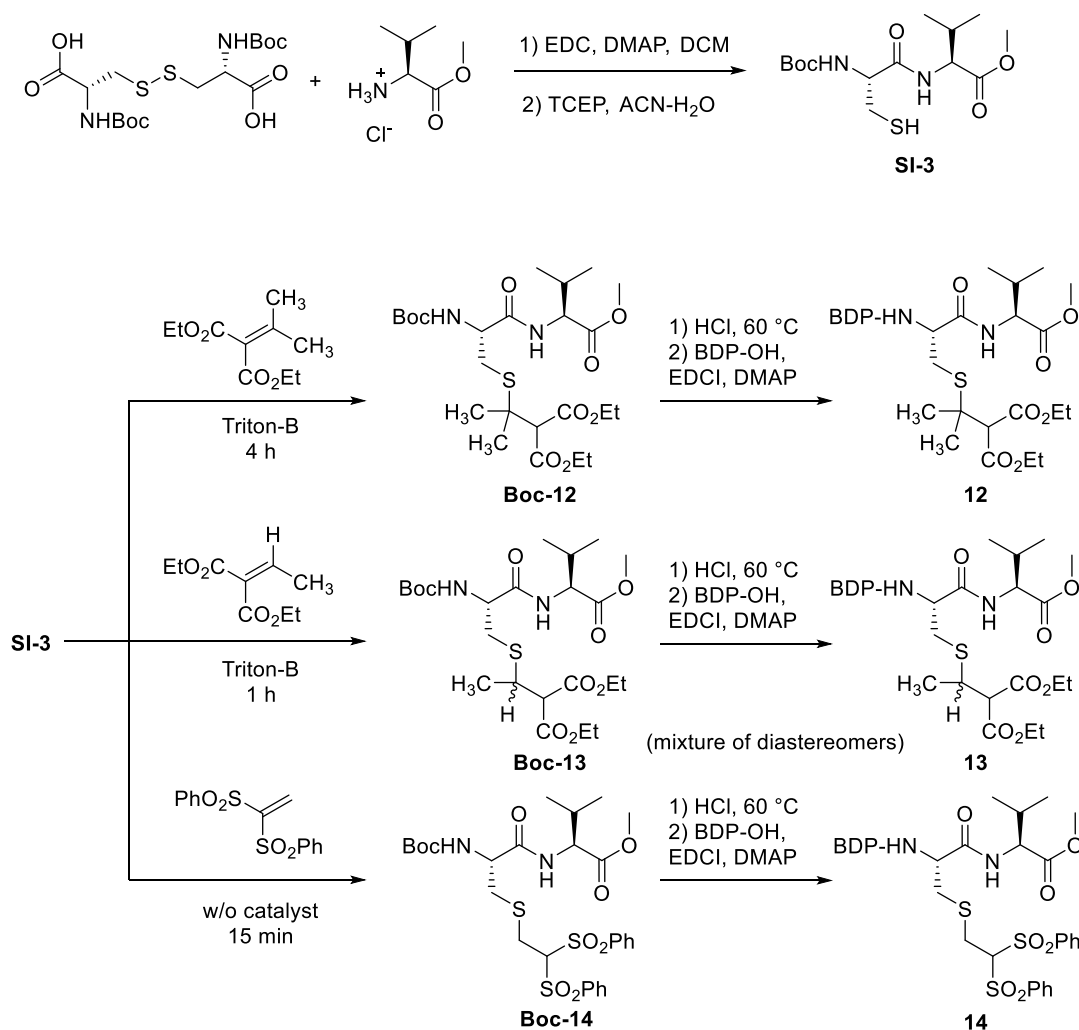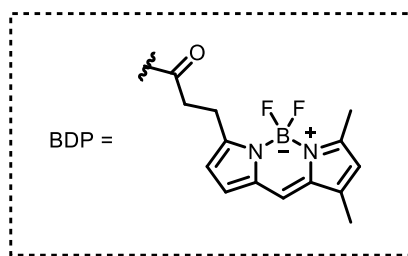

681

682 **Preparation of Boc-Cys-Val-OMe dipeptide (SI-3)**

683 To a N<sub>2</sub>-flushed flask containing (Boc-Cys-OH)<sub>2</sub> (440.5 mg, 1.0 mmol), *L*-Valine methyl ester  
684 hydrochloride (502.9 mg, 3.0 mmol) in 20 mL dry DCM at 0 °C was added EDCI·HCl (575.1 mg, 3.0 mmol)  
685 and DMAP (12.2 mg, 0.1 mmol). The mixture was slowly warmed and stirred at room temperature  
686 overnight, diluted with EtOAc (60 mL) washed with sat'd NaHCO<sub>3</sub> (30 mL x 2) and brine (30 mL). The

687 organic layer was dried, concentrated and purified by chromatography (20-50% EtOAc in hexane) to  
688 afford the disulfide (Boc-Cys-Val-OMe)<sub>2</sub> as a white solid, which was dissolved in ACN-H<sub>2</sub>O (15 mL + 15  
689 mL) was added tris(2-carboxyethyl)phosphine hydrochloride (TCEP·HCl, 573.3 mg, 2.0 mmol). The  
690 solution was stirred at 37 °C for 5 h. After completion, it was diluted in DCM (20 mL) and washed with  
691 sat'd NaHCO<sub>3</sub> (20 mL x 2) and brine (20 mL), dried (Na<sub>2</sub>SO<sub>4</sub>) and concentrated *in vacuo* to afford the title  
692 compound **SI-3** as a white solid (185.1 mg, 0.553 mmol, 55% yield). <sup>1</sup>H NMR (400 MHz, CDCl<sub>3</sub>) δ 6.85  
693 (brs, 1H), 5.48 (brs, 1H), 4.51 (dd, *J* = 8.7, 4.9 Hz, 1H), 4.34 (m, 1H), 3.73 (s, 3H), 3.05 (m, 1H), 2.73 (m,  
694 1H), 2.19 (m, 1H), 1.69 (m, 1H), 1.45 (s, 9H), 0.92 (dd, *J* = 11.9, 6.9 Hz, 6H). <sup>13</sup>C NMR (100 MHz, CDCl<sub>3</sub>)  
695 δ 172.17, 170.38, 155.69, 80.83, 57.56, 55.69, 52.44, 31.28, 28.47, 26.82, 19.23, 17.92. **MS** (ESI)  
696 Calculated for C<sub>14</sub>H<sub>26</sub>N<sub>2</sub>NaO<sub>5</sub>S [M+Na<sup>+</sup>] 357.1; observed 357.2.

697

#### 698 **General procedure for the preparation of Boc-protected precursor Boc12-14**

699 To an oven-dried, N<sub>2</sub>-flushed flask containing 66.8 mg (0.20 mmol) of dipeptide **SI-3** in 2 mL dry THF at  
700 -78°C was added Triton-B (8 μL, 40% in methanol, 0.02 mmol) in 2 mL dry THF dropwise, then  
701 corresponding electron-deficient alkene (0.15 mmol) in 2 mL dry THF was added dropwise. The reaction  
702 mixture was then stirred at room temperature until completion of reaction (see scheme above), then  
703 diluted with brine (20 mL) and extracted with DCM (20 mL x 3). The combined organic layers were dried  
704 (Na<sub>2</sub>SO<sub>4</sub>), concentrated and purified by chromatography (20-50% EtOAc in hexane) to afford Boc-  
705 protected compounds **Boc12-14**.

706

#### 707 **Diethyl 2-(2-(((*R*)-2-((tert-butoxycarbonyl)amino)-3-(((*S*)-1-methoxy-3-methyl-1-oxobutan-2- 708 yl)amino)-3-oxopropyl)thio)propan-2-yl)malonate (Boc-12)**

709 Compound **Boc-12** was prepared as a colorless oil, 34.6 mg, 0.065 mmol, 43% yield. <sup>1</sup>H NMR (400 MHz,  
710 CDCl<sub>3</sub>) δ 6.97 (brs, 1H), 5.49 (brs, 1H), 4.47 (dd, *J* = 8.7, 4.9 Hz, 1H), 4.18 (m, 4H), 3.70 (s, 3H), 3.04  
711 (dd, *J* = 12.9, 6.6 Hz, 1H), 2.88 (dd, *J* = 12.9, 6.1 Hz, 1H), 2.15 (m, 1H), 1.55 (s, 3H), 1.53 (s, 3H), 1.43

712 (s, 9H), 1.25 (td,  $J = 7.1, 2.3$  Hz, 6H), 0.91 (dd,  $J = 8.9, 6.9$  Hz, 6H).  $^{13}\text{C}$  NMR (100 MHz,  $\text{CDCl}_3$ )  $\delta$  171.91,  
713 170.49, 167.36, 167.12, 80.40, 61.53, 61.45, 60.41, 57.42, 52.12, 46.06, 31.29, 30.32, 28.34, 26.88,  
714 26.54, 19.02, 17.77, 14.11. **MS** (ESI) Calculated for  $\text{C}_{24}\text{H}_{43}\text{N}_2\text{O}_9\text{S}$  [ $\text{M}+\text{H}^+$ ] 535.3; observed 535.3.

715

716 **Diethyl 2-(1-(((*R*)-2-((tert-butoxycarbonyl)amino)-3-(((*S*)-1-methoxy-3-methyl-1-oxobutan-2-  
717 **yl)amino)-3-oxopropyl)thio)ethyl)malonate (Boc-13)****

718 Compound **Boc-13** was isolated as an inseparable mixture of diastereomers. Off-white solid, 54.8 mg,  
719 0.105 mmol, 70% yield.  $^1\text{H}$  NMR (400 MHz,  $\text{CDCl}_3$ )  $\delta$  7.05, 6.97 (brs, 1H), 5.63, 5.48 (brs, 1H), 4.50 (m,  
720 1H), 4.40, 4.31 (m, 1H), 4.21 (m, 4H), 3.72, 3.70 (s, 3H), 3.51 (m, 2H), 2.92 (m, 2H), 2.17 (m, 1H), 1.45,  
721 1.45 (s, 9H), 1.41, 1.39 (s, 3H), 1.27, 1.27 (t,  $J = 7.1$  Hz, 6H), 0.94, 0.91 (t,  $J = 8.6$  Hz, 6H).  $^{13}\text{C}$  NMR  
722 (100 MHz,  $\text{CDCl}_3$ )  $\delta$  172.00, 171.89, 170.70, 170.55, 168.00, 167.69, 167.42, 80.47, 80.21, 61.85, 61.79,  
723 58.28, 58.17, 57.60, 57.41, 52.22, 52.13, 40.11, 38.83, 31.35, 31.17, 28.40, 28.36, 20.11, 20.08, 19.07,  
724 17.85, 17.80, 14.16. **MS** (ESI) Calculated for  $\text{C}_{23}\text{H}_{41}\text{N}_2\text{O}_9\text{S}$  [ $\text{M}+\text{H}^+$ ] 521.3; observed 521.3.

725

726 **Methyl S-(2,2-bis(phenylsulfonyl)ethyl)-N-(tert-butoxycarbonyl)-L-cysteinyl-L-valinate (Boc-14)**

727 Compound **Boc-14** was prepared as a white solid, 85.1 mg, 0.133 mmol, 88% yield.  $^1\text{H}$  NMR (400 MHz,  
728  $\text{CDCl}_3$ )  $\delta$  8.08 (m, 4H), 7.71 (m, 2H), 7.58 (m, 4H), 7.07 (d,  $J = 8.8$  Hz, 1H), 5.52 (m, 2H), 4.51 (m, 2H),  
729 3.74 (s, 3H), 3.59 (dd,  $J = 16.2, 4.7$  Hz, 1H), 3.16 (dd,  $J = 15.9, 6.6$  Hz, 1H), 2.93 (dd,  $J = 14.6, 6.8$  Hz,  
730 1H), 2.74 (dd,  $J = 14.7, 6.6$  Hz, 1H), 2.20 (m, 1H), 1.50 (s, 9H), 0.92 (dd,  $J = 15.1, 6.9$  Hz, 6H).  $^{13}\text{C}$  NMR  
731 (100 MHz,  $\text{CDCl}_3$ )  $\delta$  172.01, 170.44, 155.67, 138.06, 137.05, 134.93, 134.68, 130.24, 129.85, 129.18,  
732 129.13, 83.23, 80.33, 57.59, 53.62, 52.26, 37.44, 30.83, 28.44, 19.12, 17.65. **MS** (ESI) Calculated for  
733  $\text{C}_{28}\text{H}_{39}\text{N}_2\text{O}_9\text{S}_3$  [ $\text{M}+\text{H}^+$ ] 643.2 observed 643.3.

734

735

736 **General procedure for the preparation of fluorescent redox-caged sulfenic acids 12-14**

737 **Boc12-14** (0.05 mmol) was treated with 2 mL HCl (4.0 M solution in dioxane) and microwaved at 60 °C  
738 for 20 min. After cooling, the solution was concentrated *in vacuo*, taken in DCM (10 mL) and washed with  
739 sat'd NaHCO<sub>3</sub> solution (10 mL). The aqueous layer was extracted with DCM (10 mL x 2). Combined  
740 organic solutions were dried (Na<sub>2</sub>SO<sub>4</sub>) and concentrated *in vacuo*. The product above and 3-BODIPY-  
741 propanoic acid (0.05 mmol) was dissolved in dry DCM at 0 °C, followed by addition of EDCI·HCl (0.05  
742 mmol) and DMAP (0.01 mmol). The mixture was slowly warmed to room temperature while stirring for 3  
743 h. After completion, the mixture was diluted with DCM (10 mL) and washed with sat'd NaHCO<sub>3</sub> (10 mL)  
744 and brine (10 mL). The organic layer was dried (Na<sub>2</sub>SO<sub>4</sub>), concentrated and purified by flash  
745 chromatography (10-50% EtOAc in hexane) to afford compound **12-14**.

746 **Diethyl** **2-(2-(((R)-2-(3-(5,5-difluoro-7,9-dimethyl-5*H*-5λ<sup>4</sup>,6λ<sup>4</sup>-dipyrrolo[1,2-*c*:2',1'-**  
747 **f][1,3,2]diazaborinin-3-yl)propanamido)-3-(((S)-1-methoxy-3-methyl-1-oxobutan-2-yl)amino)-3-**  
748 **oxopropyl)thio)propan-2-yl)malonate (12)**

749 Compound **12** was prepared as a dark red solid, 19.8 mg, 0.028 mmol, 56% yield. **<sup>1</sup>H NMR** (400 MHz,  
750 CDCl<sub>3</sub>) δ 7.15 (d, *J* = 8.6 Hz, 1H), 7.07 (s, 1H), 6.86 (d, *J* = 4.0 Hz, 1H), 6.78 (d, *J* = 6.8 Hz, 1H), 6.28 (d,  
751 *J* = 4.1 Hz, 1H), 6.10 (s, 1H), 4.61 (td, *J* = 7.1, 5.8 Hz, 1H), 4.44 (dd, *J* = 8.6, 5.0 Hz, 1H), 4.20 (m, 4H),  
752 3.79 (s, 1H), 3.71 (s, 3H), 3.30 (t, *J* = 7.5 Hz, 2H), 3.02 (dd, *J* = 13.6, 5.8 Hz, 1H), 2.72 (m, 3H), 2.55 (s,  
753 3H), 2.24 (s, 3H), 2.17 (m, 1H), 1.58 (s, 3H), 1.55 (s, 3H), 1.26 (t, *J* = 7.1 Hz, 6H), 0.93 (t, *J* = 6.7 Hz, 6H).  
754 **<sup>13</sup>C NMR (100 MHz, CDCl<sub>3</sub>)** δ 172.28, 171.83, 170.33, 167.82, 167.31, 160.52, 157.31, 143.96, 135.32,  
755 133.50, 128.23, 123.91, 120.55, 117.28, 61.69, 61.55, 60.48, 57.75, 53.09, 52.18, 46.33, 35.52, 31.05,  
756 30.17, 27.05, 26.37, 24.69, 19.14, 17.87, 15.06, 14.15, 11.42. **MS** (ESI) Calculated for C<sub>33</sub>H<sub>48</sub>BF<sub>2</sub>N<sub>4</sub>O<sub>8</sub>S  
757 [M+H<sup>+</sup>] 709.3 observed 709.3.

758

759 **Diethyl** 2-(1-(((R)-2-(3-(5,5-difluoro-7,9-dimethyl-5*H*-5 $\lambda^4$ ,6 $\lambda^4$ -dipyrrolo[1,2-*c*:2',1'-

760 **f**][1,3,2]diazaborinin-3-yl)propanamido)-3-(((S)-1-methoxy-3-methyl-1-oxobutan-2-yl)amino)-3-

761 **oxopropyl**)thio)ethyl)malonate (**13**)

762 Compound **13** was isolated as an inseparable mixture of diastereomers. Dark red solid, 15.0 mg, 0.022

763 mmol, 43% yield. **<sup>1</sup>H NMR** (400 MHz, CDCl<sub>3</sub>)  $\delta$  7.15; 7.07 (d, *J* = 8.7 Hz, 1H), 7.07 (s, 1H), 6.87 (m, 1H),

764 7.03; 6.66 (d, *J* = 7.0 Hz, 1H), 6.30; 6.27(d, *J* = 4.1 Hz, 1H), 6.10 (s, 1H), 4.71 (m, 1H), 4.46 (m, 1H), 4.20

765 (m, 4H), 3.71; 3.70 (s, 3H), 3.55 (m, 2H), 3.32 (m, 2H), 3.17; 2.93 (dd, *J* = 14.1, 4.6 Hz, 1H), 2.69 (m,

766 3H), 2.55 (m, 3H), 2.24 (s, 3H), 2.17 (m, 1H), 1.43; 1.41 (d, *J* = 2.3 Hz, 3H), 1.26 (m, 6H), 0.93 (s, 6H).

767 **<sup>13</sup>C NMR** (100 MHz, CDCl<sub>3</sub>)  $\delta$  172.52, 171.89, 171.78, 171.75, 170.47, 170.36, 168.46, 168.10, 167.77,

768 167.55, 160.56, 157.48, 157.30, 143.97, 135.34, 133.51, 128.20, 123.92, 120.54, 117.28, 67.23, 62.04,

769 61.89, 58.33, 57.92, 57.86, 57.64, 53.39, 52.27, 52.23, 52.15, 40.52, 38.70, 35.73, 35.41, 33.28, 32.33,

770 31.13, 31.00, 24.70, 20.12, 19.14, 19.13, 17.92, 17.86, 15.07, 14.19, 14.16, 14.13, 11.44. **MS** (ESI)

771 Calculated for C<sub>32</sub>H<sub>46</sub>BF<sub>2</sub>N<sub>4</sub>O<sub>8</sub>S [M+H<sup>+</sup>] 694.3 observed 694.3.

772

773 **Methyl** *S*-(2,2-bis(phenylsulfonyl)ethyl)-*N*-(3-(5,5-difluoro-7,9-dimethyl-5*H*-5 $\lambda^4$ ,6 $\lambda^4$ -dipyrrolo[1,2-

774 **c**:2',1'-**f**][1,3,2]diazaborinin-3-yl)propanoyl)-*L*-cysteinyll-*L*-valinate (**14**)

775 Compound **14** was prepared as a dark red solid, 17.3 mg, 0.021 mmol, 42% yield. **<sup>1</sup>H NMR** (400 MHz,

776 CDCl<sub>3</sub>)  $\delta$  8.12 (m, 2H), 8.07 (m, 2H), 7.68 (m, 2H), 7.58 (m, 4H), 7.09 (s, 2H), 6.88 (d, *J* = 4.1 Hz, 1H),

777 6.53 (d, *J* = 7.8 Hz, 1H), 6.28 (d, *J* = 4.0 Hz, 1H), 6.12 (s, 1H), 5.83 (dd, *J* = 6.5, 4.9 Hz, 1H), 4.87 (dt, *J*

778 = 7.9, 6.7 Hz, 1H), 4.45 (dd, *J* = 8.7, 4.7 Hz, 1H), 3.74 (s, 3H), 3.63 (dd, *J* = 16.1, 4.9 Hz, 1H), 3.34 (t, *J*

779 = 7.6 Hz, 2H), 3.18 (dd, *J* = 16.0, 6.5 Hz, 1H), 2.91 (dd, *J* = 14.8, 6.7 Hz, 1H), 2.70 (m, 3H), 2.57 (s, 3H),

780 2.25 (s, 3H), 2.20 (m, 1H), 0.91 (dd, *J* = 13.7, 6.9 Hz, 6H). **<sup>13</sup>C NMR** (100 MHz, CDCl<sub>3</sub>)  $\delta$  171.92, 171.89,

781 170.25, 160.69, 157.08, 144.13, 138.00, 137.14, 135.42, 134.93, 134.69, 133.49, 130.30, 129.93, 129.23,

782 129.21, 128.26, 124.00, 120.65, 117.11, 82.89, 77.36, 57.75, 52.34, 52.32, 37.73, 35.31, 30.73, 28.64,

783 24.51, 19.20, 17.66, 15.11, 11.46. **MS** (ESI) Calculated for C<sub>37</sub>H<sub>44</sub>BF<sub>2</sub>N<sub>4</sub>O<sub>8</sub>S<sub>3</sub> [M+H<sup>+</sup>] 817.2 observed  
784 817.2.

785

786 **Preparation of redox-caged CoQ10 (Compound 19)**

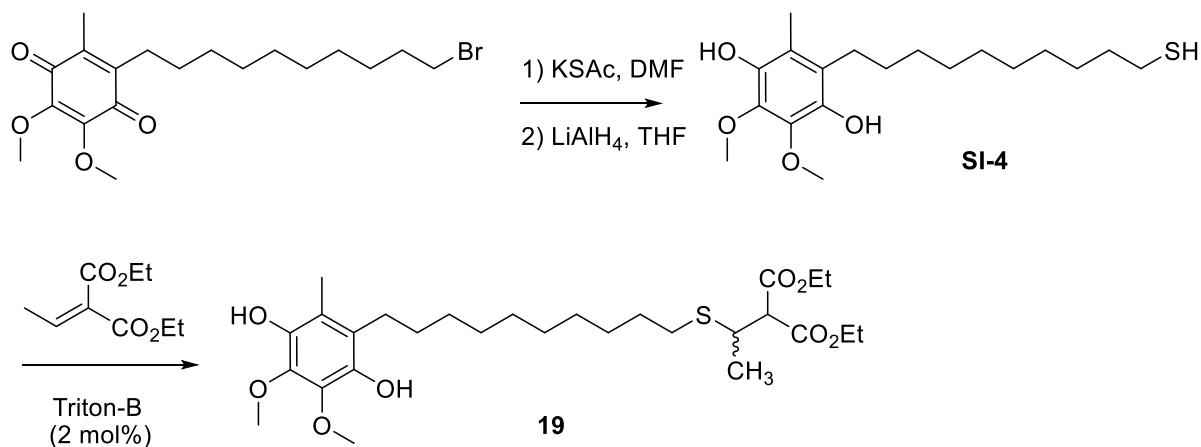

788 **2-(10-mercaptodecyl)-5,6-dimethoxy-3-methylbenzene-1,4-diol (SI-4)**

789 2-(10-bromodecyl)-5,6-dimethoxy-3-methylcyclohexa-2,5-diene-1,4-dione<sup>7</sup> (100 mg, 0.25 mmol) in 2 mL  
790 DMF was treated with potassium thioacetate (45 mg, 0.40 mmol). After stirring at room temperature for  
791 15 min, the mixture was diluted in H<sub>2</sub>O (15 mL) and extracted with EtOAc (15 mL x 3), dried (Na<sub>2</sub>SO<sub>4</sub>)  
792 and concentrated. The residue was taken in EtOH and filtered. The filtrate was concentrated again to  
793 give the crude thioacetate product as a yellow oil, which was re-dissolved in 5 mL dry THF. The resulting  
794 solution was cooled to -78 °C and LiAlH<sub>4</sub> (0.6 mL, 1.0 M in ether, 0.60 mmol) was added dropwise. After  
795 slowly warming to room temperature (30 min), the mixture was carefully quenched with 1.0 M HCl (2 mL),  
796 extracted with EtOAc (15 mL x 3), dried (Na<sub>2</sub>SO<sub>4</sub>) and concentrated. The product was purified by flash  
797 chromatography (10-30% EtOAc in hexane) to afford the title compound **SI-4** as a yellow oil (62.5 mg,  
798 0.176 mmol, 70% yield). **<sup>1</sup>H NMR** (400 MHz, CDCl<sub>3</sub>) δ 3.89 (s, 6H), 2.59 (m, 2H), 2.53 (q, *J* = 7.5 Hz, 2H),  
799 2.16 (s, 3H), 1.61 (m, 2H), 1.48 (m, 2H), 1.34 (m, 13H). **<sup>13</sup>C NMR** (100 MHz, CDCl<sub>3</sub>) δ 140.13, 139.94,  
800 136.75, 136.73, 123.40, 117.81, 60.91, 60.85, 34.17, 29.99, 29.66, 29.63, 29.63, 29.59, 29.19, 28.49,  
801 26.45, 24.78, 11.27. **MS** (ESI) Calculated for C<sub>19</sub>H<sub>33</sub>O<sub>4</sub>S [M+H<sup>+</sup>] 357.2; observed 357.2.



802 **Diethyl 2-(1-((10-(2,5-dihydroxy-3,4-dimethoxy-6-methylphenyl)decyl)thio)ethyl)malonate (19)**

803 In a N<sub>2</sub>-flushed oven-dried flask, compound **SI-4** (62.5 mg, 0.176 mmol) was dissolved in 2 mL dry THF.  
804 The solution was cooled to -78 °C, followed by dropwise addition of triton-B (40% w/w in MeOH, 1.6 μL,  
805 3.52 μmol) in 1 mL dry THF, and diethyl 2-ethylidenemalonate (36.0 mg, 0.194 mmol) in 1 mL dry THF.  
806 The mixture was slowly warmed to 55 °C and stirred for 6 h, concentrated *in vacuo*, and purified by flash  
807 chromatography (10-50% EtOAc in hexane) to afford the title compound **19** as a yellow oil (59.1 mg,  
808 0.109 mmol, 62% yield). <sup>1</sup>H NMR (400 MHz, CDCl<sub>3</sub>) δ 5.34 (d, *J* = 20.9 Hz, 2H), 4.22 (m, 4H), 3.89 (s,  
809 6H), 3.49 (d, *J* = 9.2 Hz, 1H), 3.37 (m, 1H), 2.57 (m, 4H), 2.15 (s, 3H), 1.56 (m, 2H), 1.46 (m, 2H), 1.31  
810 (m, 21H). <sup>13</sup>C NMR (100 MHz, CDCl<sub>3</sub>) δ 167.85, 167.71, 140.12, 139.94, 136.75, 136.72, 123.38, 117.77,  
811 61.68, 61.66, 60.91, 60.85, 58.54, 39.35, 31.17, 30.00, 29.72, 29.68, 29.64, 29.64, 29.60, 29.33, 29.06,  
812 26.45, 20.03, 14.20, 14.20, 11.27. **MS** (ESI) Calculated for C<sub>28</sub>H<sub>46</sub>NaO<sub>8</sub>S [M+Na<sup>+</sup>] 565.3; observed 565.3.

813

814 **Preparation of WittigQ (20)**

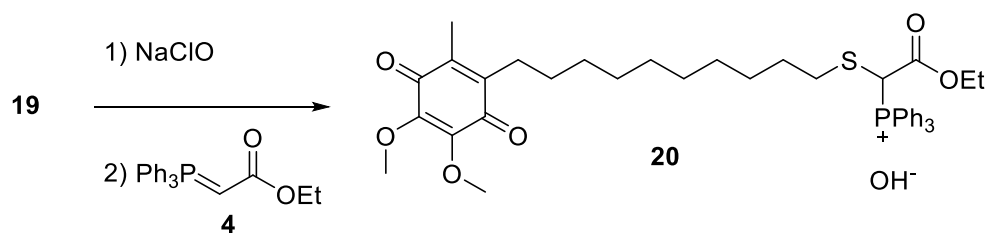

816 Compound **19** (30 mg, 0.055 mmol) was dissolved in 5 mL ACN-H<sub>2</sub>O (1:2), and treated with NaClO (0.055  
817 mmol). With brief mixing, Wittig-CO<sub>2</sub>Et (compound **4**, 0.55 mmol) was immediately added. The mixture  
818 was stirred at room temperature for 2 h, concentrated *in vacuo* and purified by prep-HPLC (5-100% ACN  
819 in H<sub>2</sub>O) to afford the title compound **20** as a yellow oil (19.9 mg, 0.028 mmol, 50%). Note 1: The quinol  
820 moiety was oxidized to quinone under aerobic conditions. Note 2: At smaller scale (50 μM of **19** and  
821 NaClO, 500 μM of **4**, when NaClO was administered slowly over 30 min *via* a syringe injector, the  
822 reaction yield was >90% as determined by LC-MS. <sup>1</sup>H NMR (400 MHz, CDCl<sub>3</sub>) δ 7.46 (m, 15 H), 4.12 (m,  
823 2H), 3.99 (d, *J* = 0.6 Hz, 6H), 2.45 (t, *J* = 7.8 Hz, 2H), 2.15 (m, 2H), 2.02 (s, 3H), 1.26 (m, 19H). <sup>13</sup>C NMR

824 (100 MHz, CDCl<sub>3</sub>) δ 184.88, 184.32, 144.47, 143.25, 138.81, 134.09, 133.99, 131.89, 131.86, 128.51,  
825 128.39, 61.30, 30.02, 29.66, 29.65, 29.55, 29.49, 29.12, 28.91, 28.59, 26.57, 12.07. **MS** (ESI) Calculated  
826 for C<sub>41</sub>H<sub>50</sub>O<sub>6</sub>PS [M<sup>+</sup>] 701.3; observed 701.2.

827

828

829

830

831

832

833

834

835

836

837

838

839

840

841

842

843

844

845 **References**

846

- 847 1. Fu, L. *et al.* A quantitative thiol reactivity profiling platform to analyze redox and electrophile  
848 reactive cysteine proteomes. *Nat. Protoc.* **15**, 2891–2919 (2020).
- 849 2. Sun, R. *et al.* Chemoproteomics Reveals Chemical Diversity and Dynamics of 4-Oxo-2-  
850 nonenal Modifications in Cells. *Mol. Cell. Proteomics* **16**, 1789 LP – 1800 (2017).
- 851 3. Holman, J. D., Ma, Z.-Q. & Tabb, D. L. Identifying Proteomic LC-MS/MS Data Sets with  
852 Bumpshooter and IDPicker. *Curr. Protoc. Bioinforma.* **37**, 13.17.1-13.17.15 (2012).
- 853 4. Tian, C., Liu, K., Sun, R., Fu, L. & Yang, J. Chemoproteomics Reveals Unexpected  
854 Lysine/Arginine-Specific Cleavage of Peptide Chains as a Potential Protein Degradation  
855 Machinery. *Anal. Chem.* **90**, 794–800 (2018).
- 856 5. Chi, H. *et al.* Comprehensive identification of peptides in tandem mass spectra using an  
857 efficient open search engine. *Nat. Biotechnol.* **36**, 1059–1061 (2018).
- 858 6. Liu, C. *et al.* pQuant Improves Quantitation by Keeping out Interfering Signals and Evaluating  
859 the Accuracy of Calculated Ratios. *Anal. Chem.* **86**, 5286–5294 (2014).
- 860 7. Antonenko, Y. N. *et al.* Mitochondria-targeted plastoquinone derivatives as tools to interrupt  
861 execution of the aging program. 1. Cationic plastoquinone derivatives: Synthesis and in vitro  
862 studies. *Biochem.* **73**, 1273–1287 (2008).

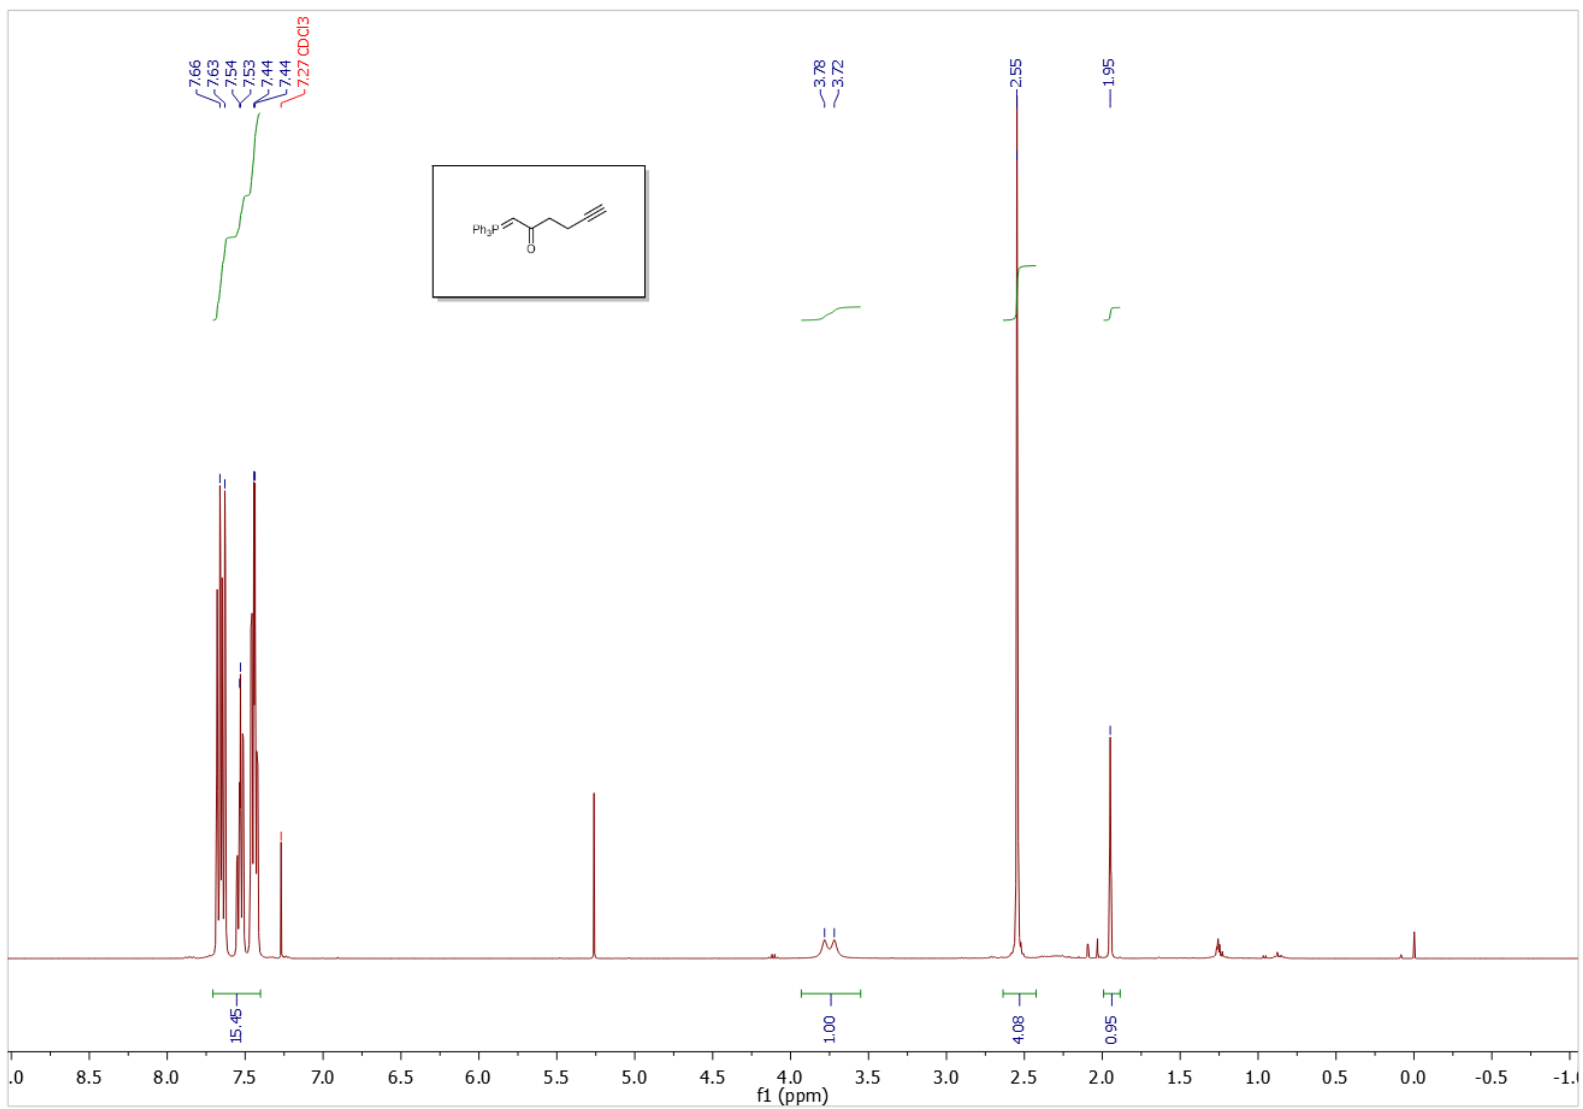

<sup>1</sup>H NMR spectra of compound **8**

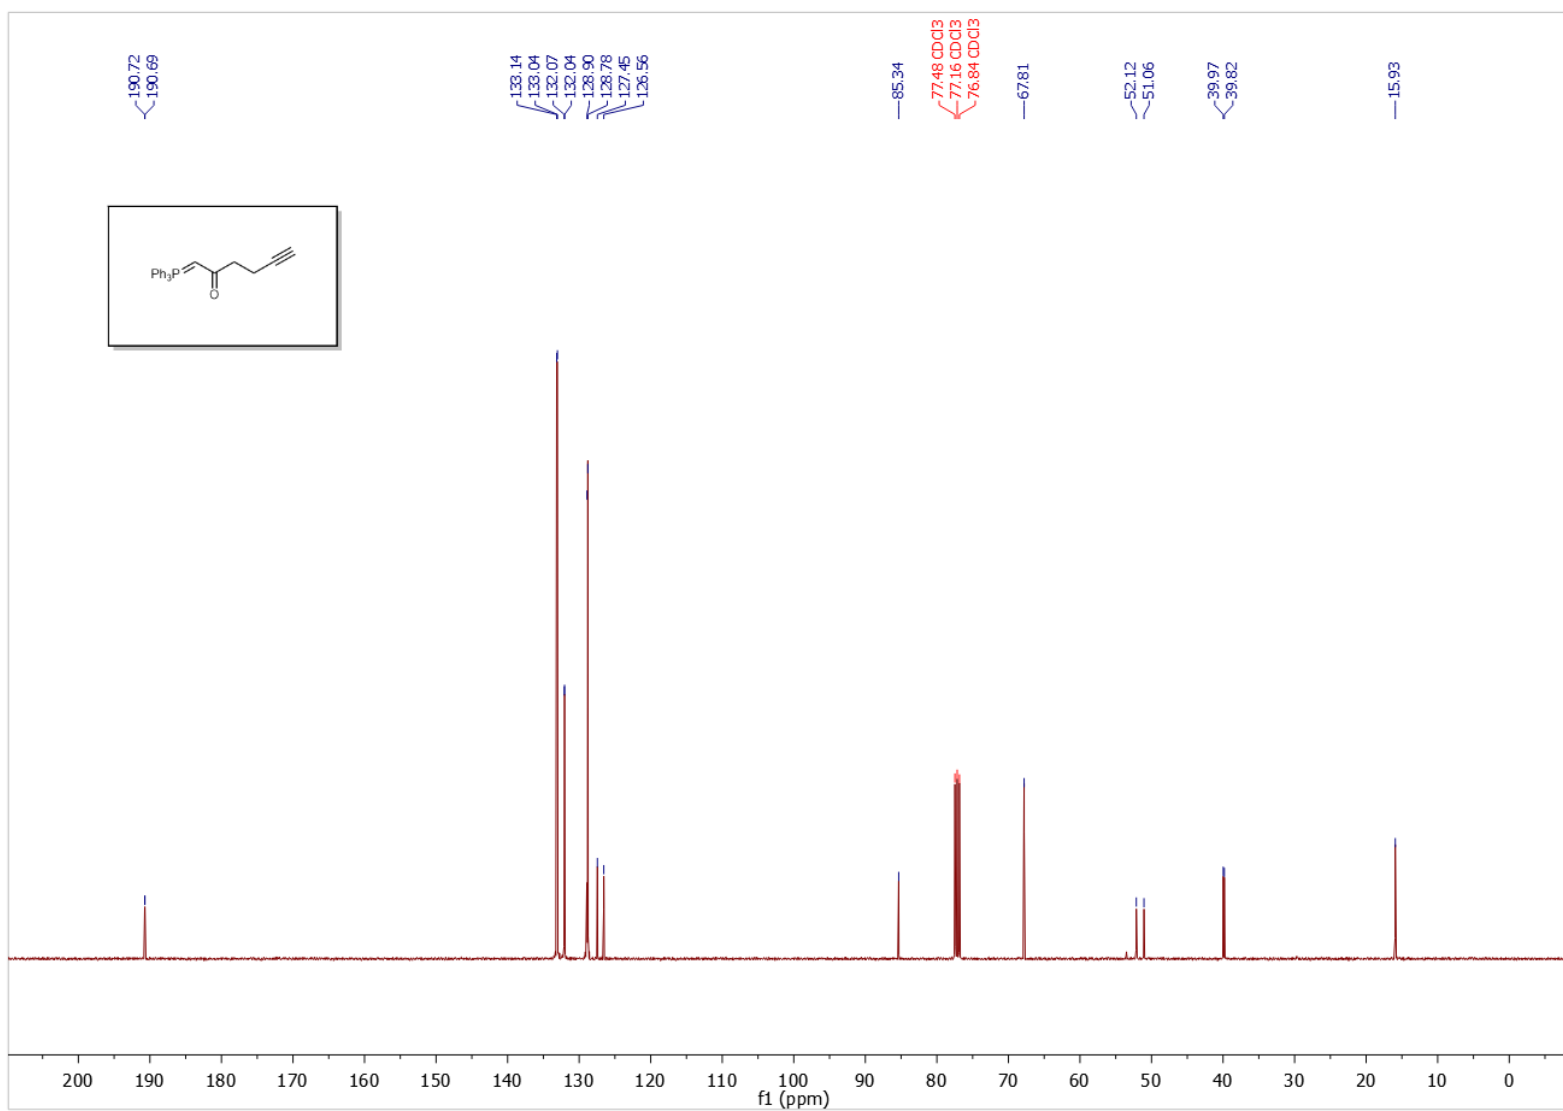

<sup>13</sup>C NMR spectra of compound **8**

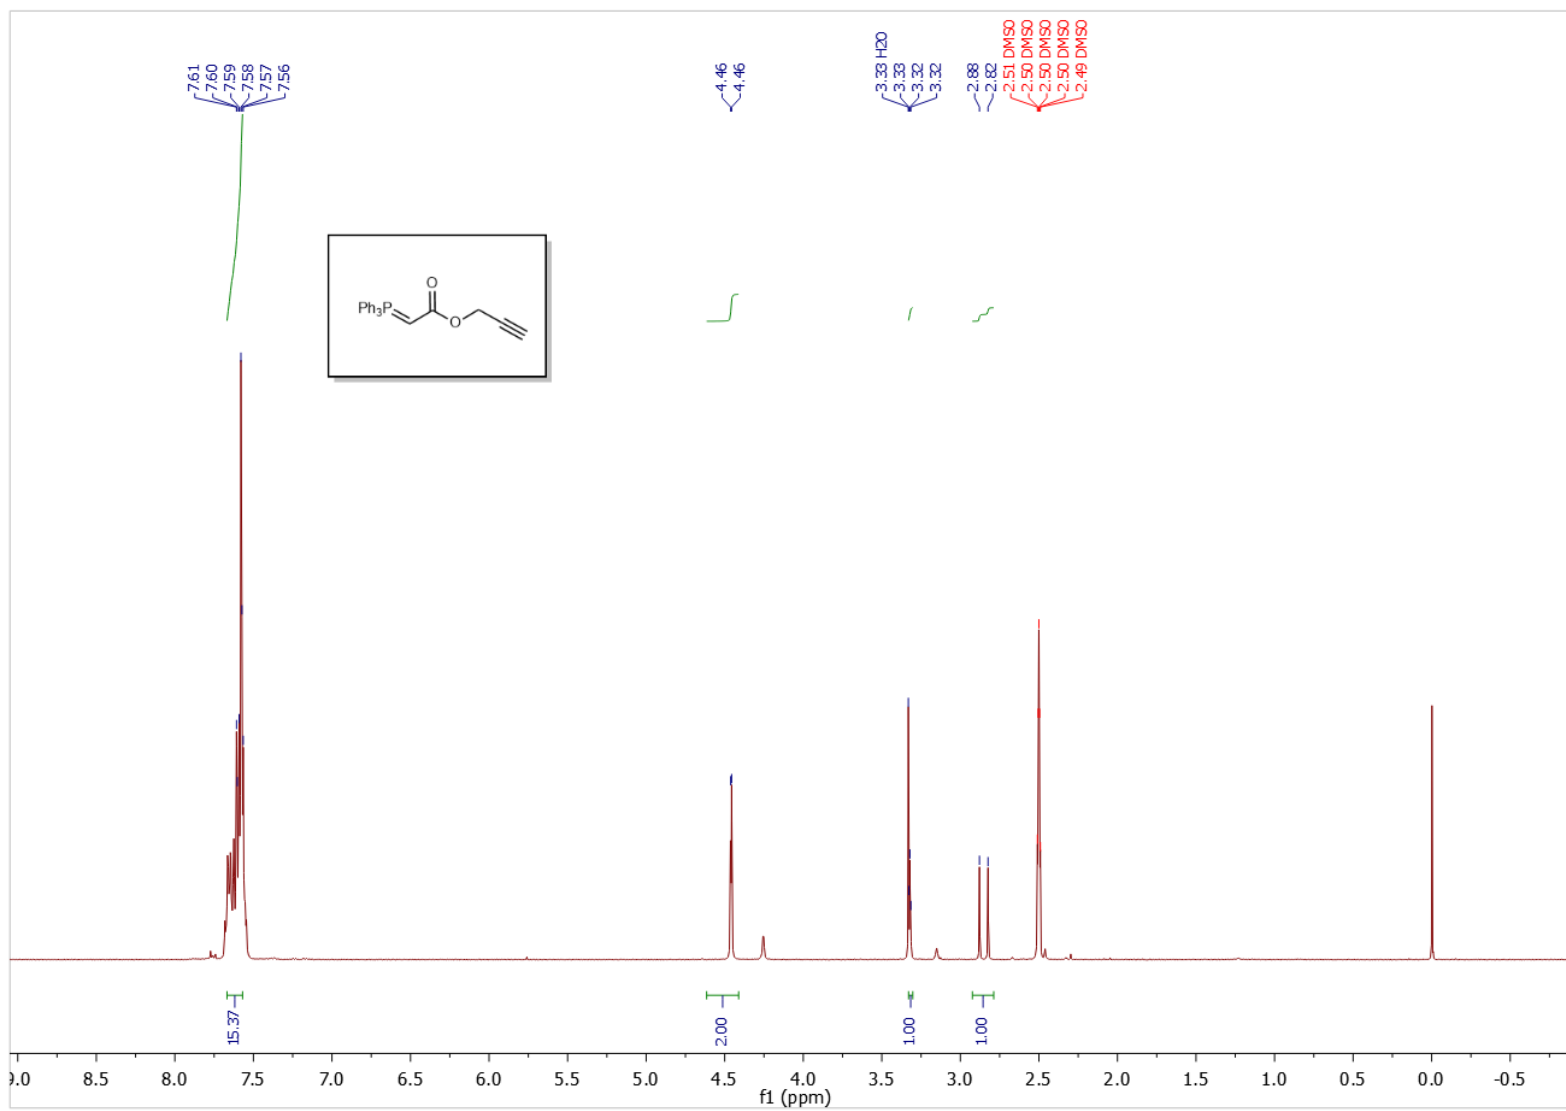

<sup>1</sup>H NMR spectra of compound **9**

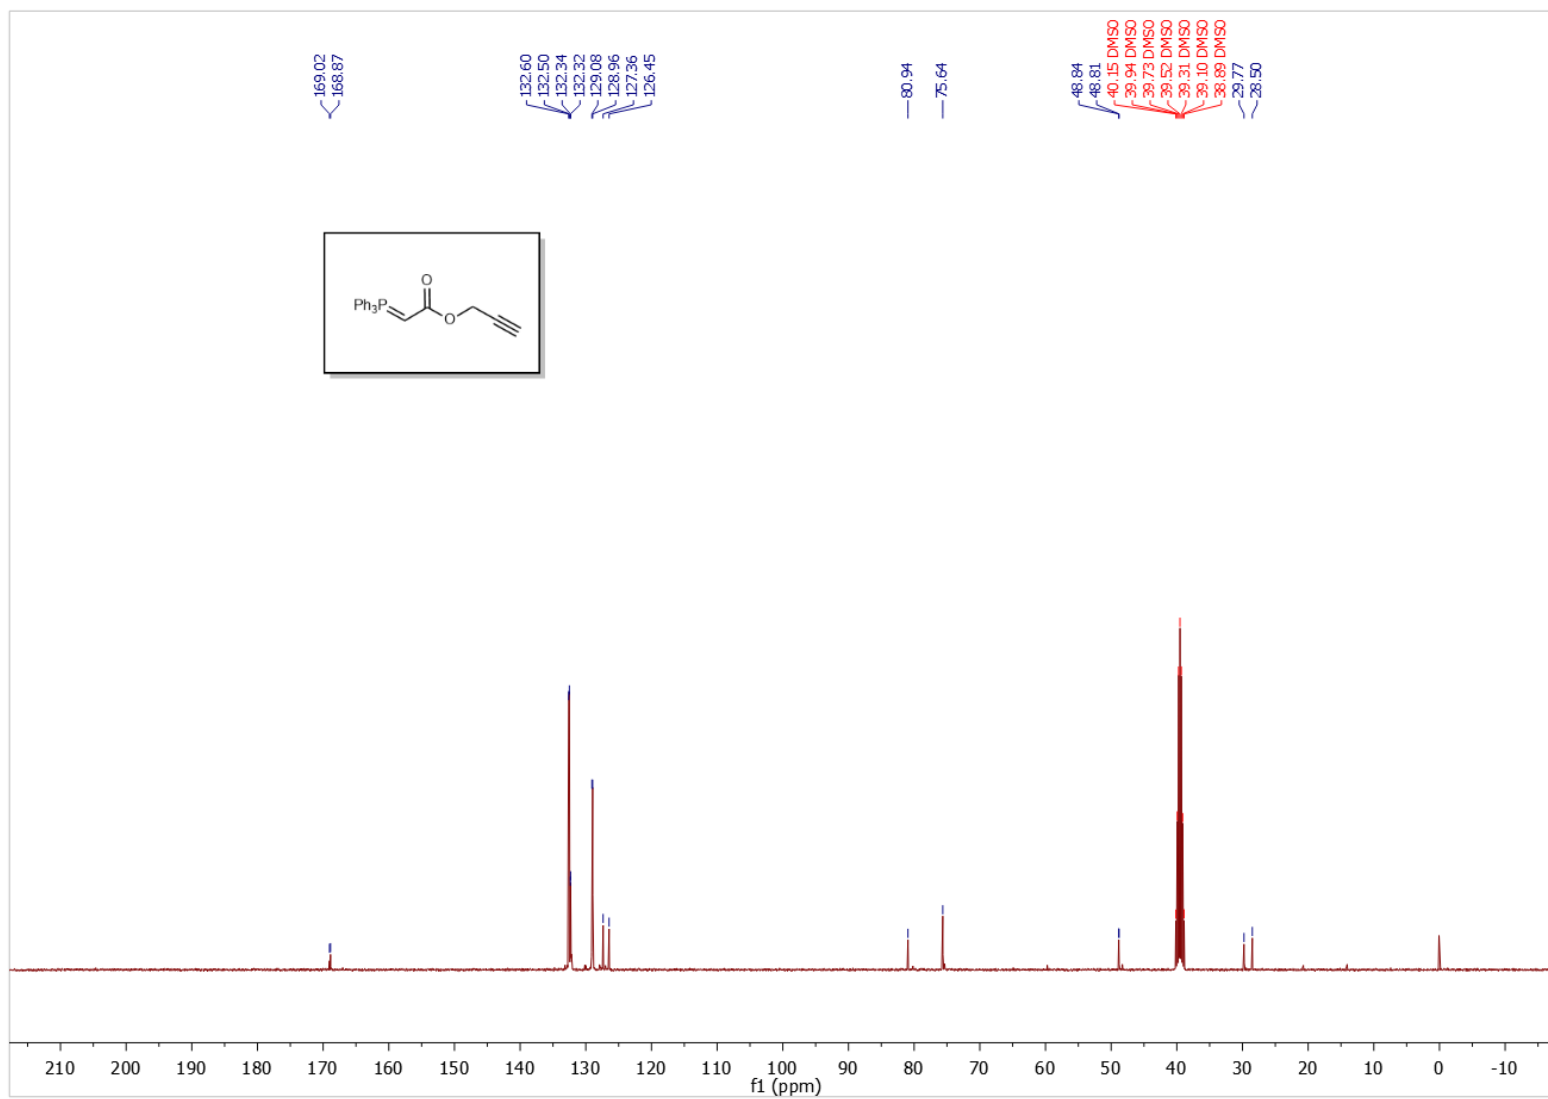

$^{13}\text{C}$  NMR spectra of compound **9**

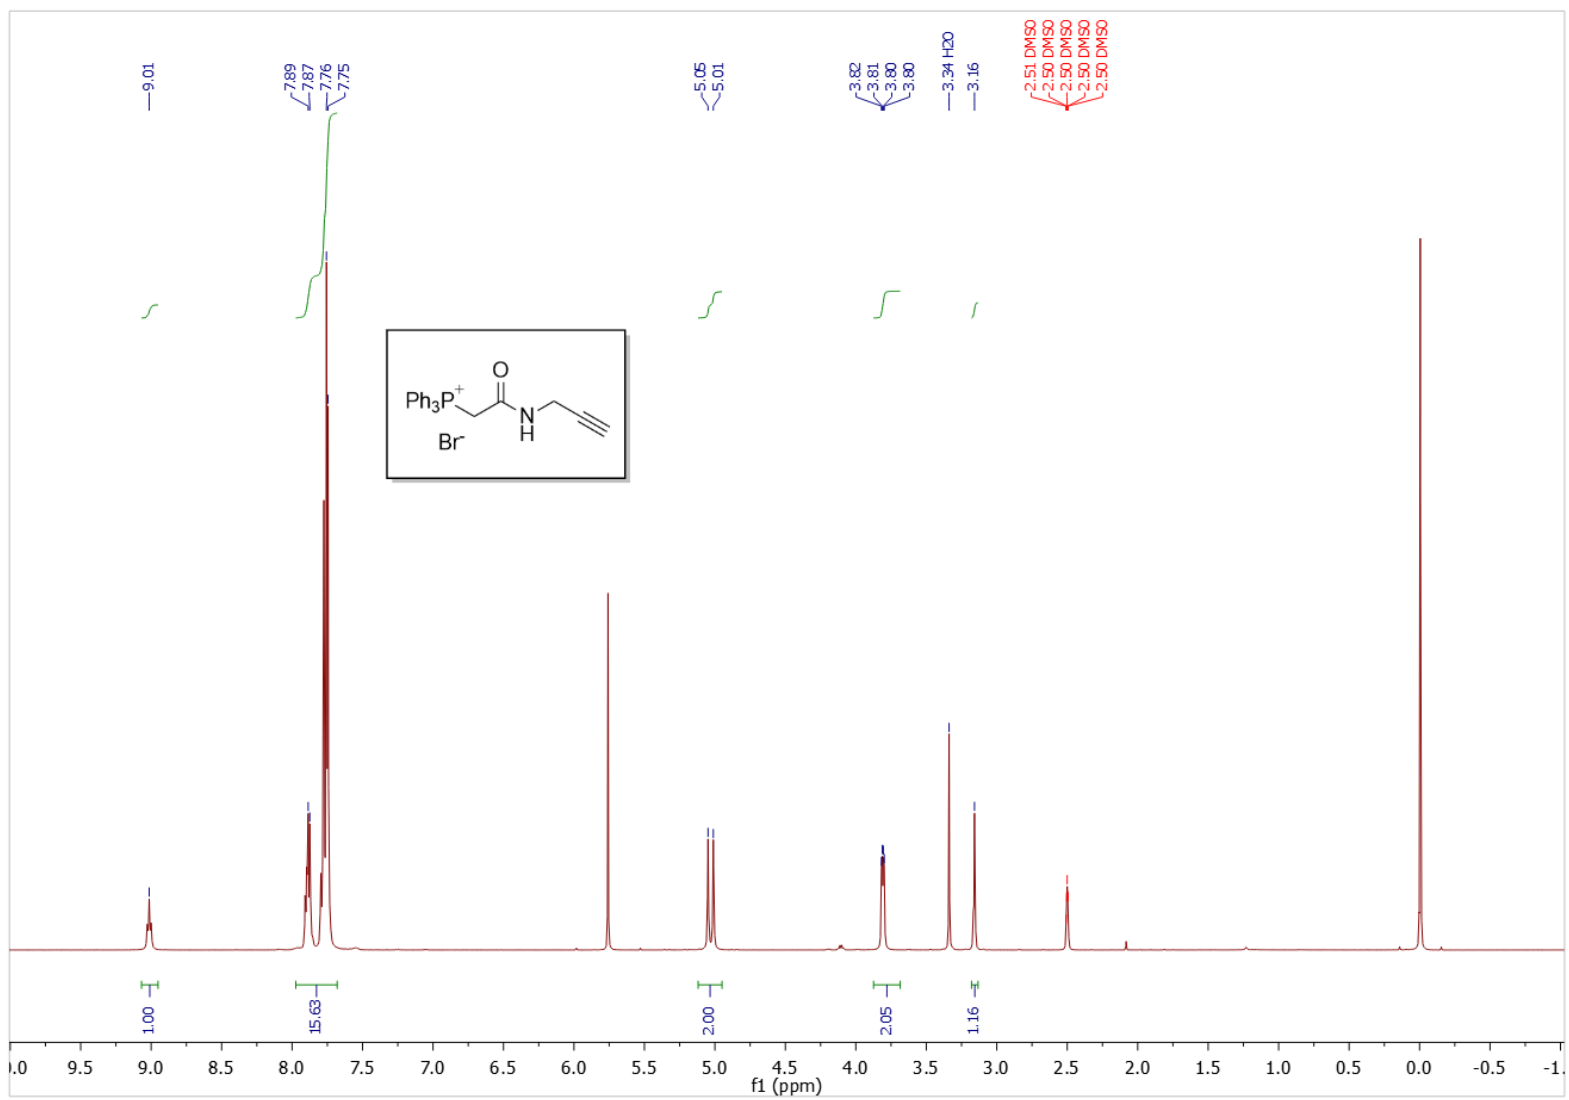

<sup>1</sup>H NMR spectra of compound **10**



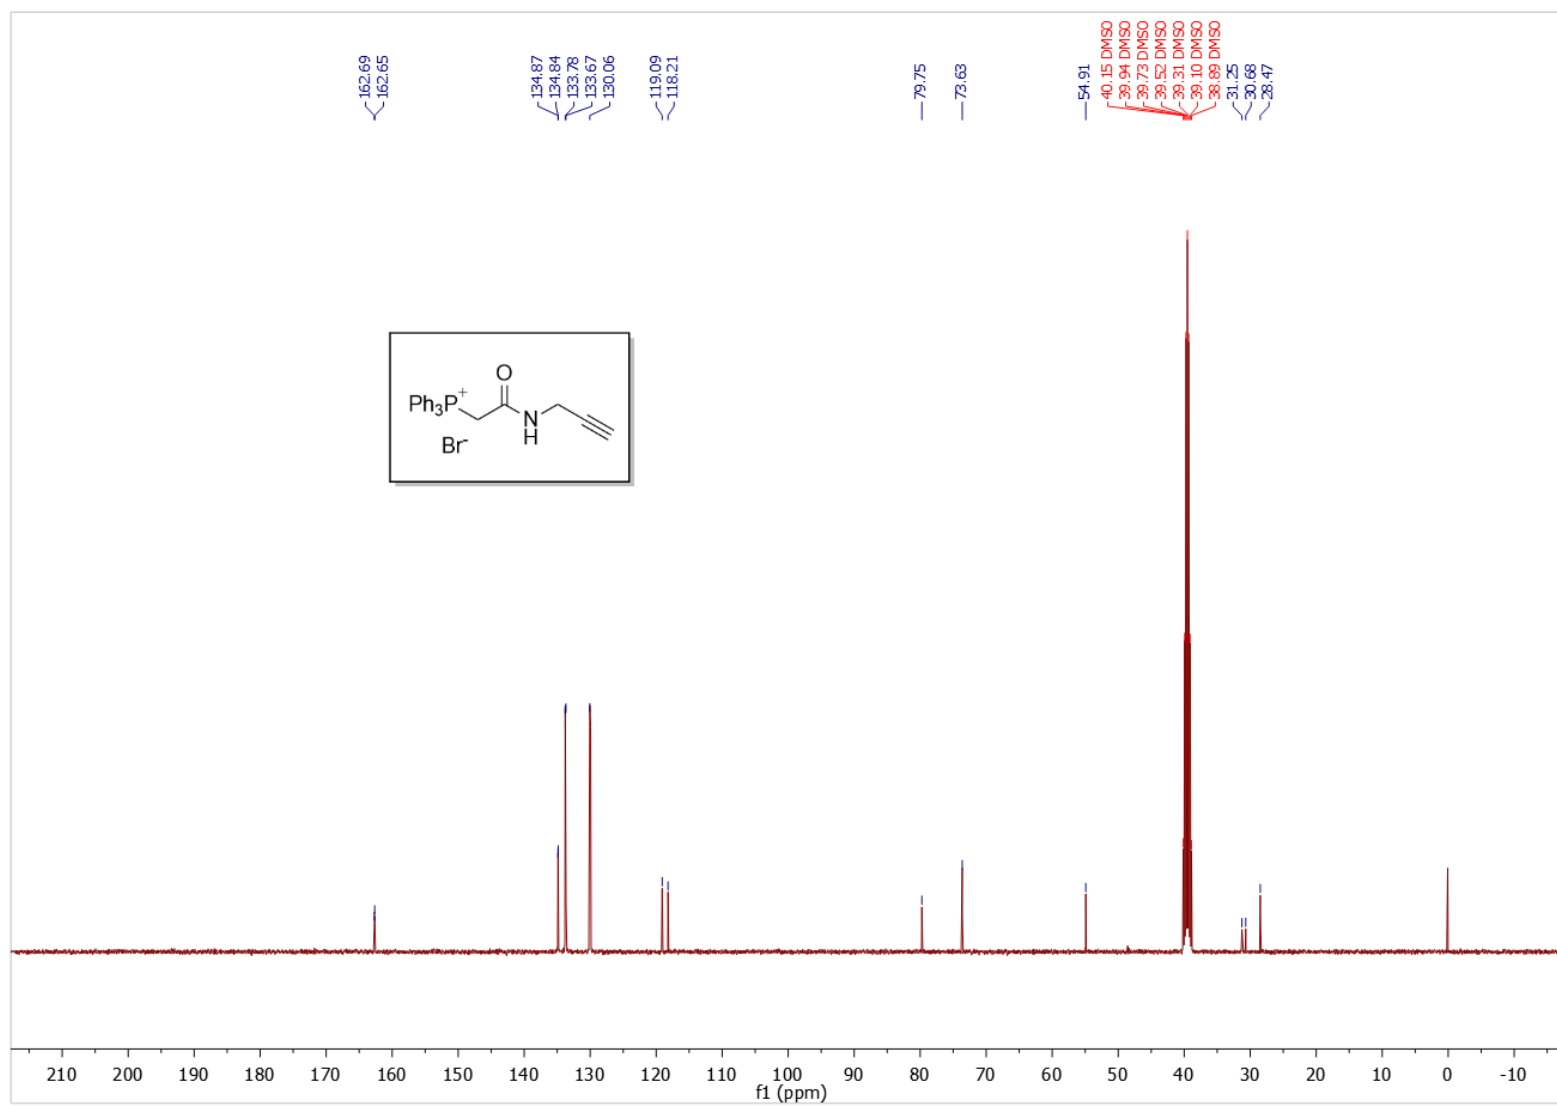

<sup>13</sup>C NMR spectra of compound 10

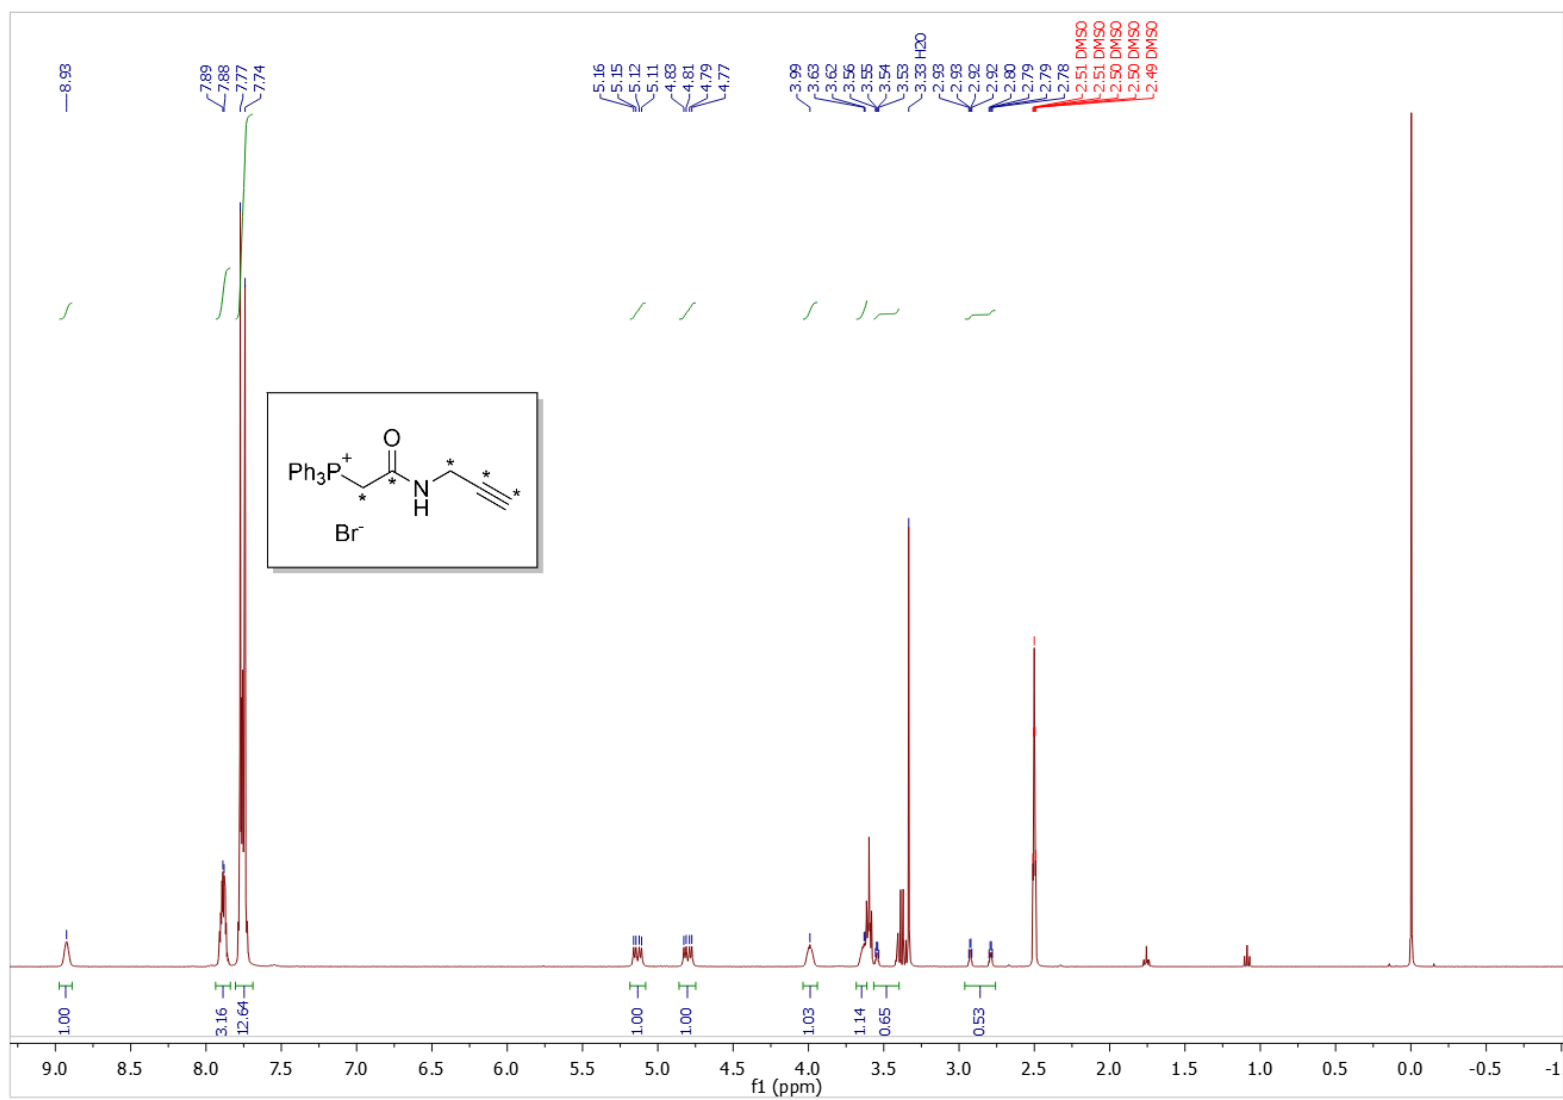

<sup>1</sup>H NMR spectra of compound **heavy-10**

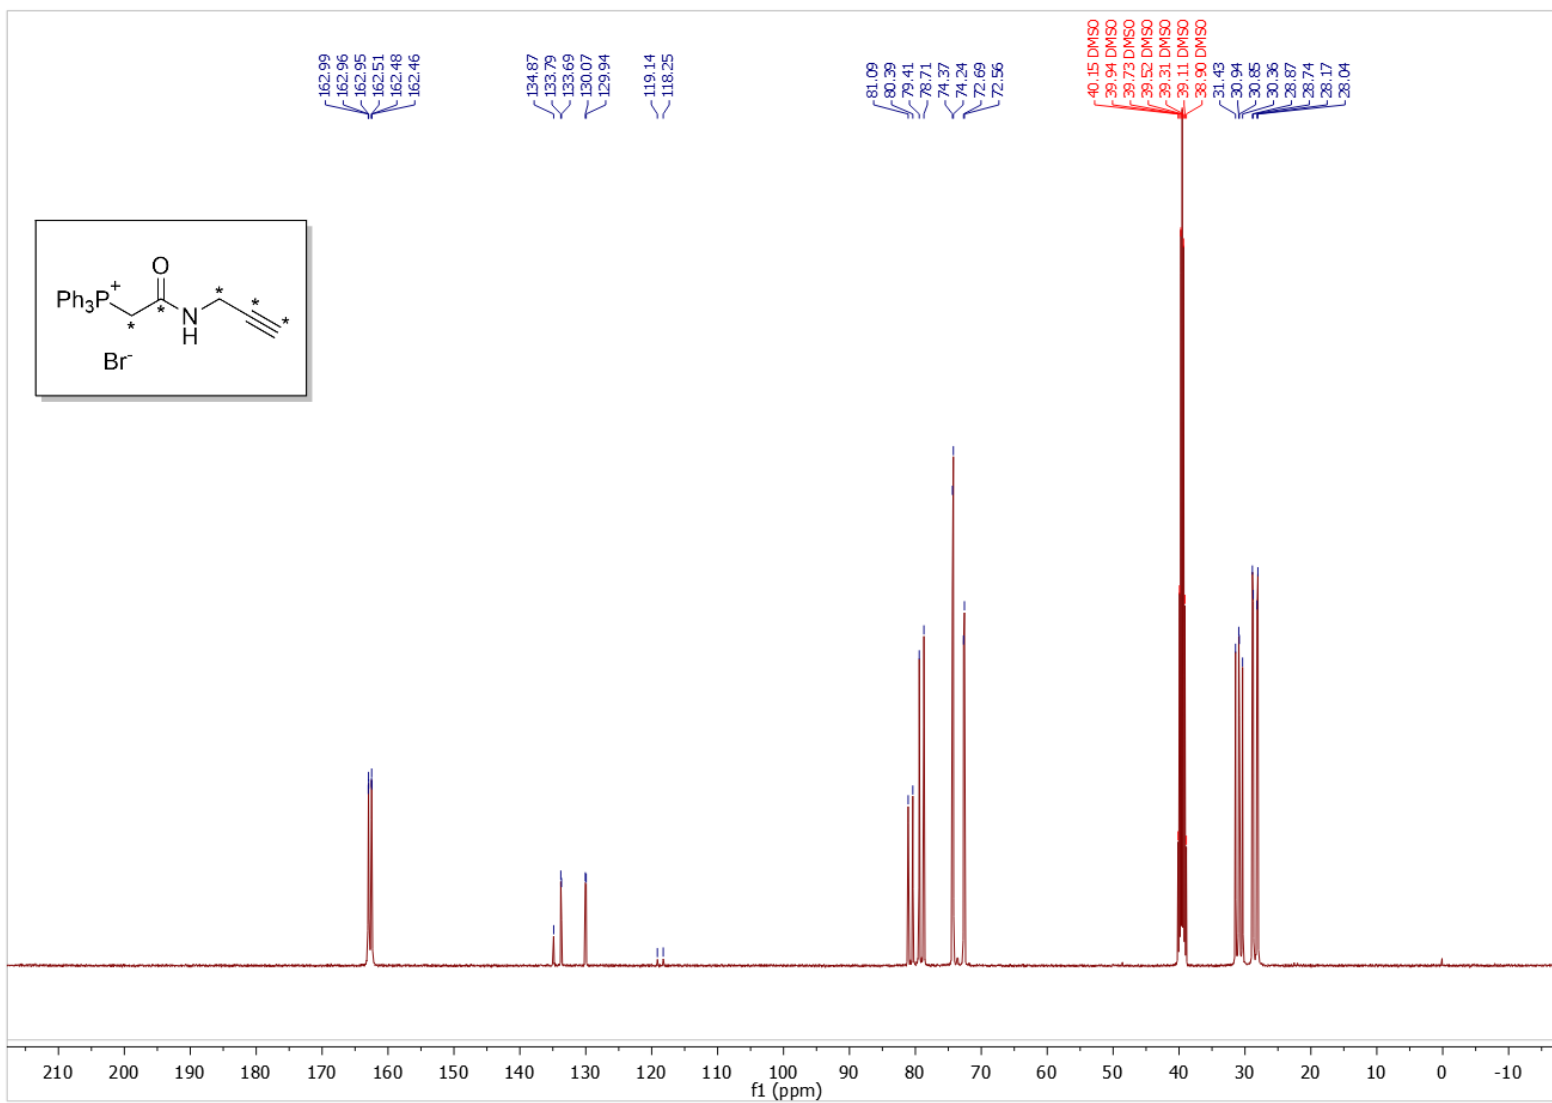

<sup>13</sup>C NMR spectra of compound **heavy-10**

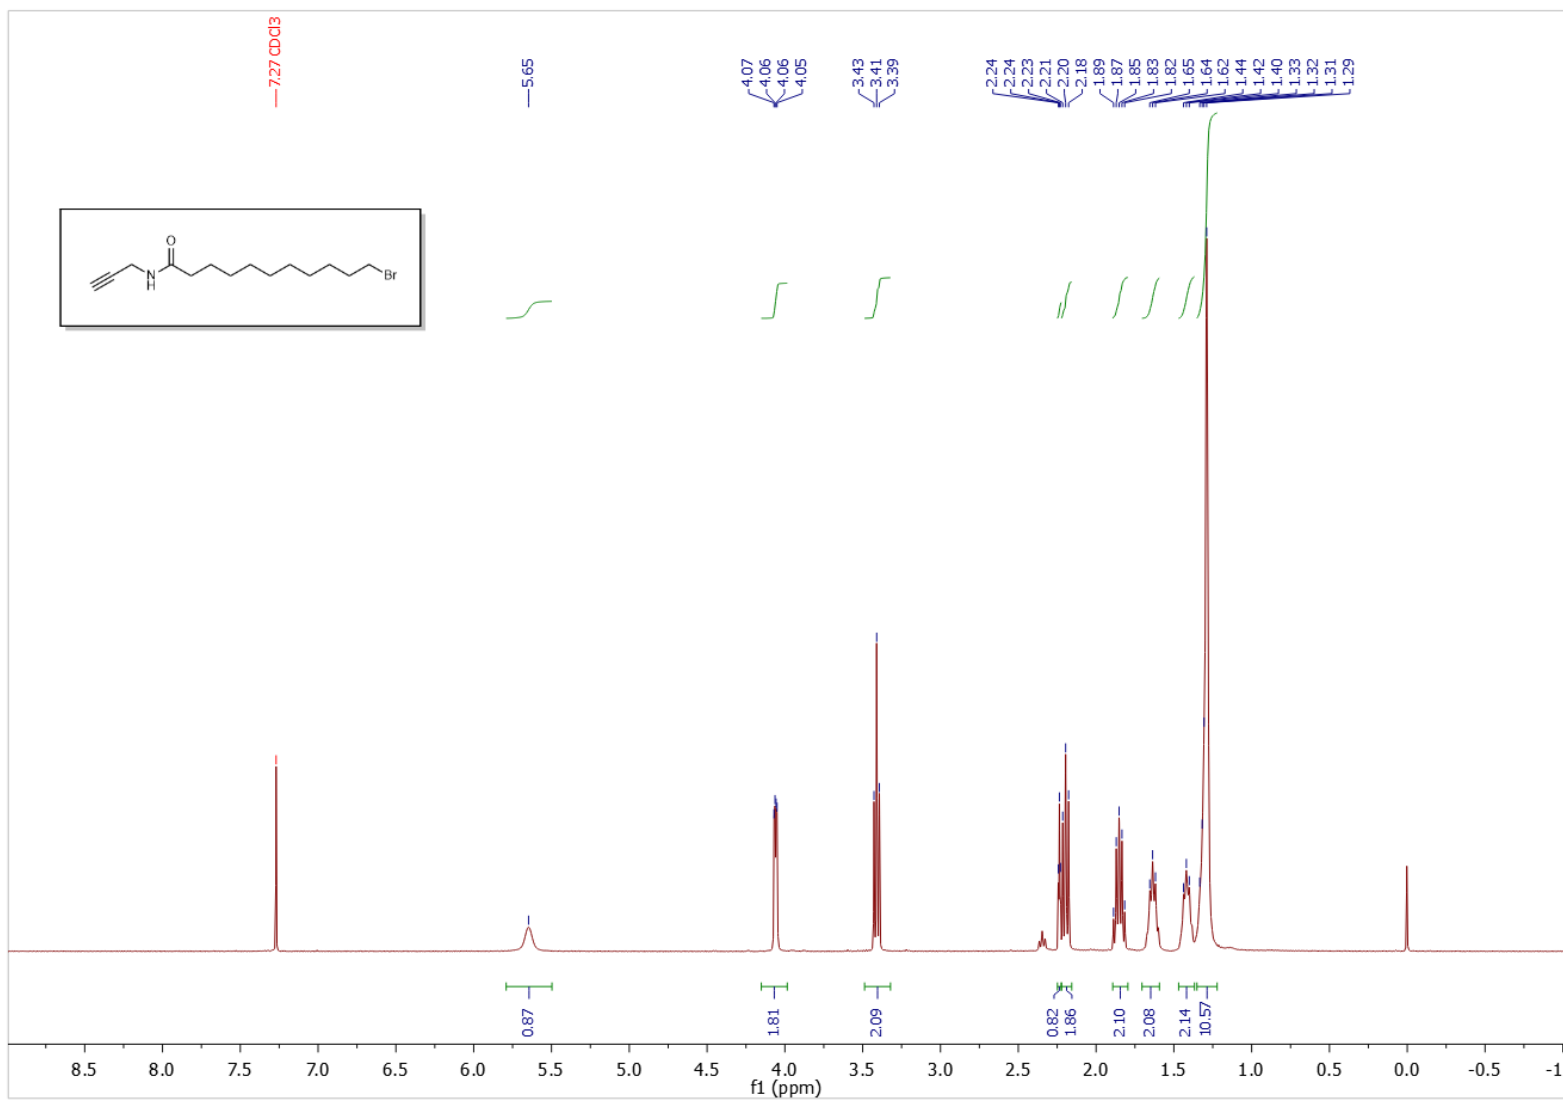

<sup>1</sup>H NMR spectra of compound SI-1

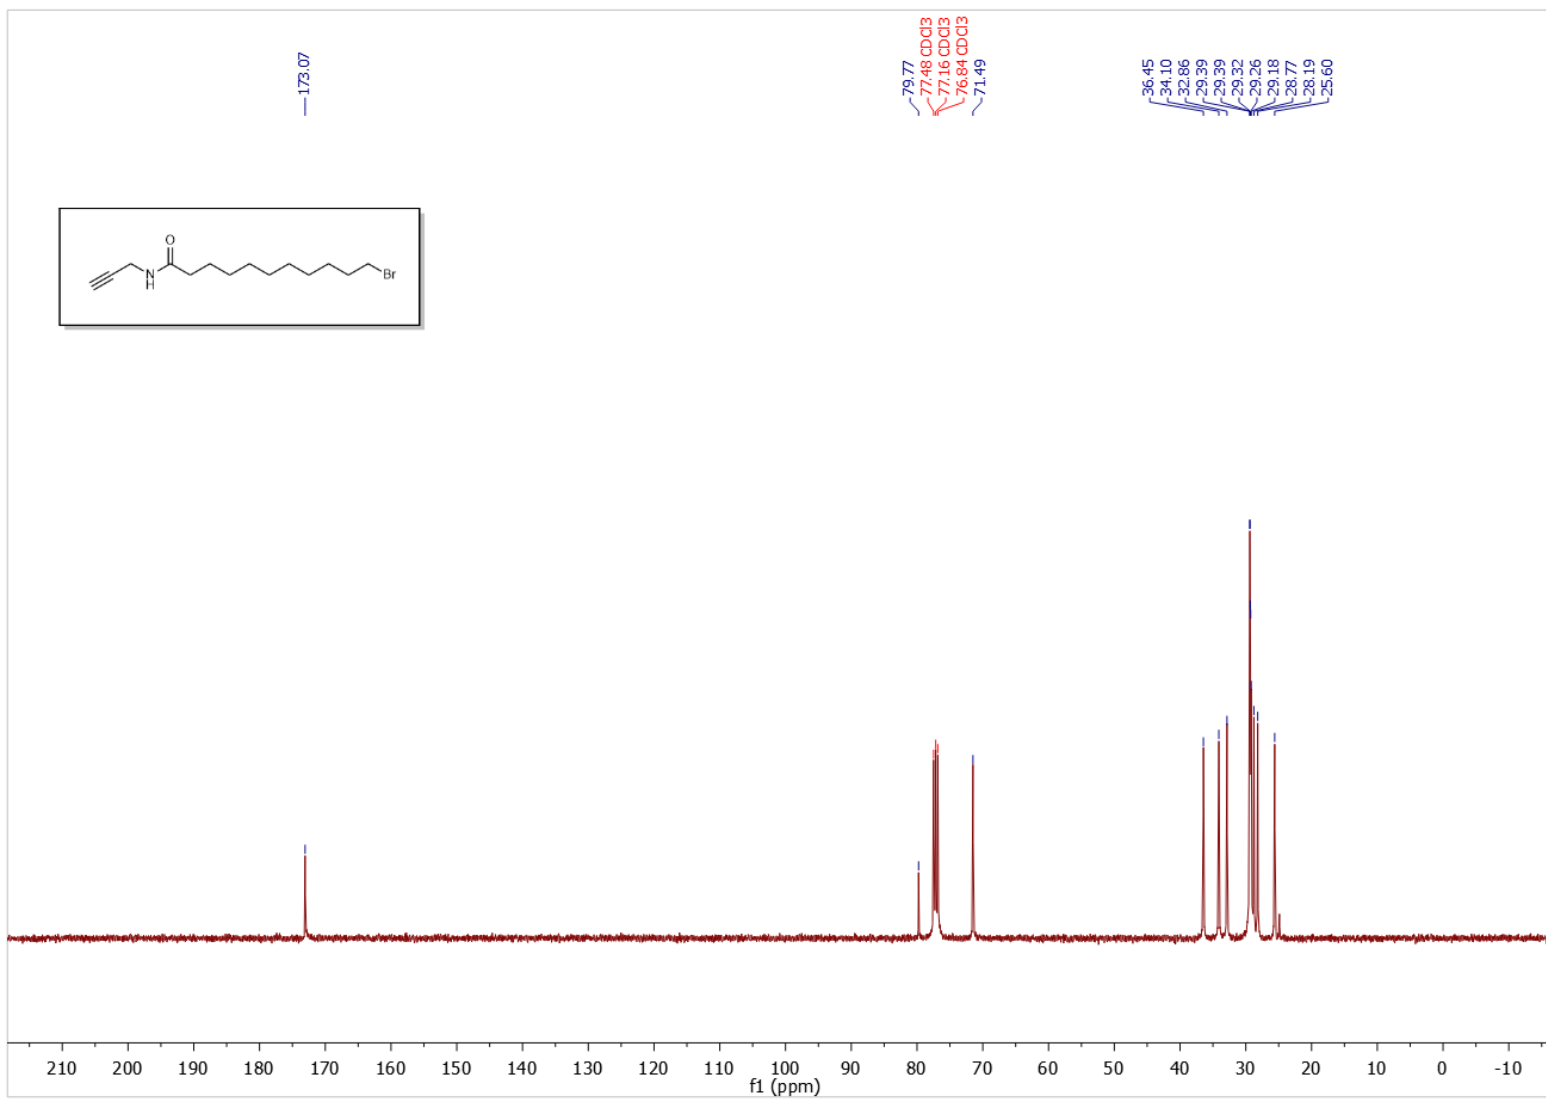

$^{13}\text{C}$  NMR spectra of compound SI-1

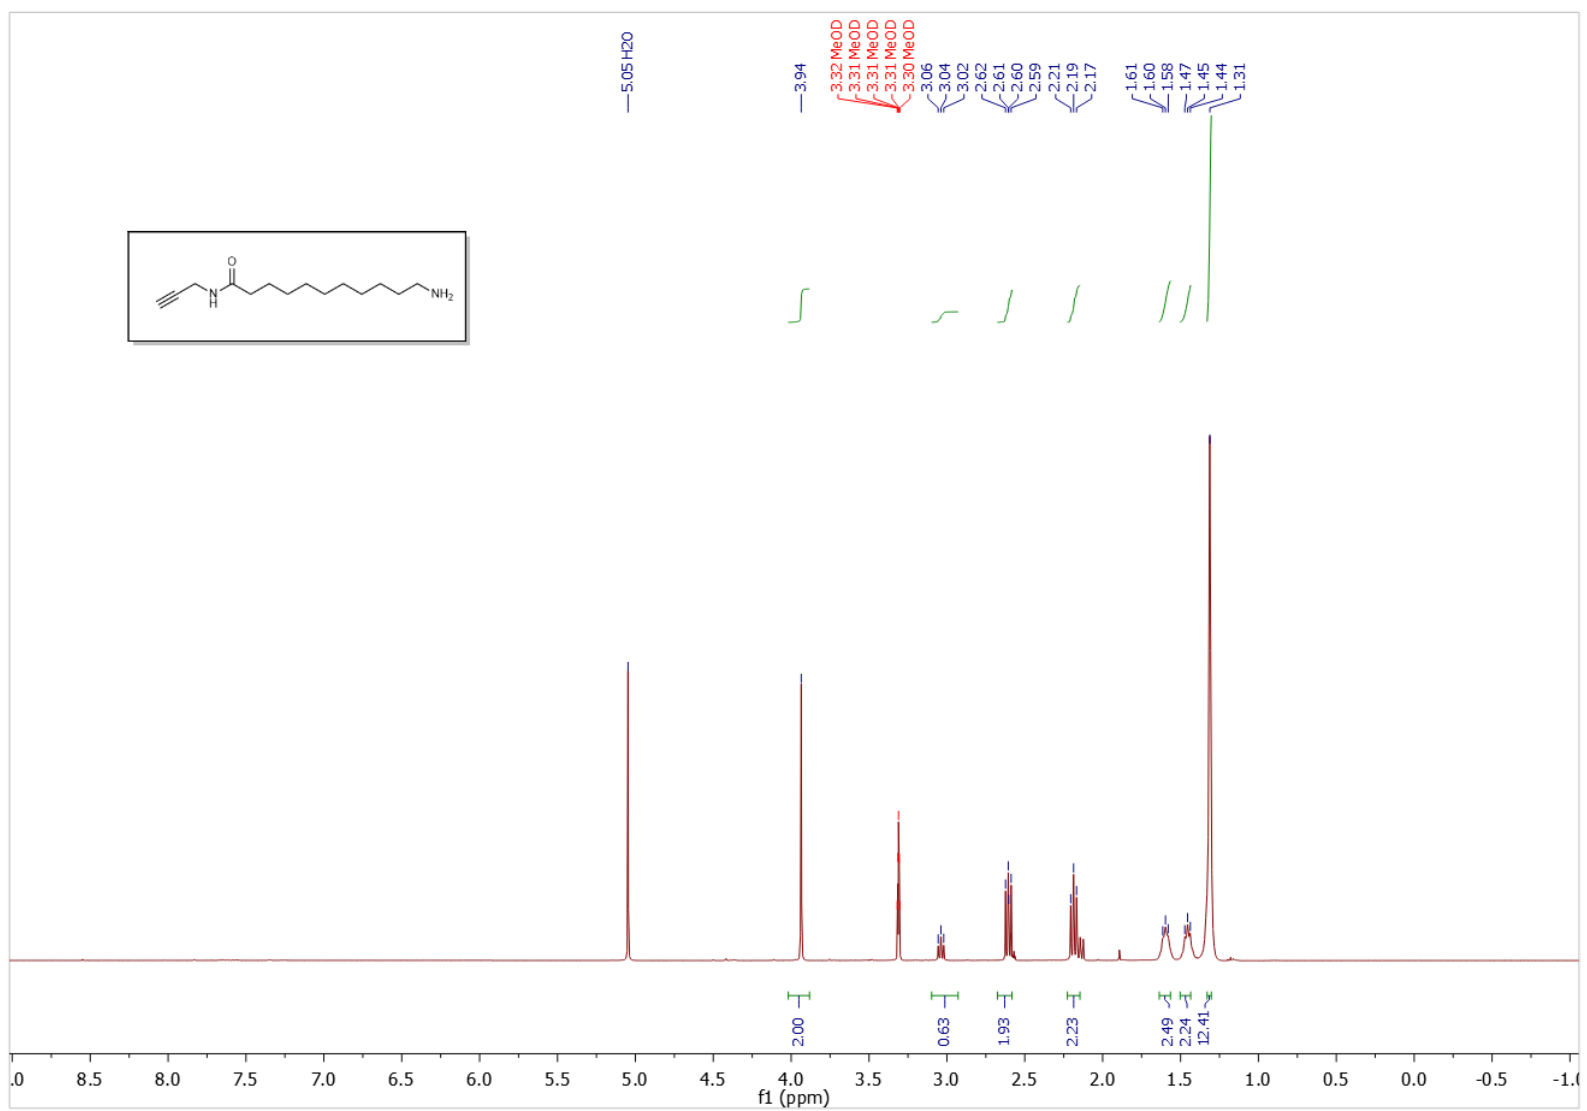

<sup>1</sup>H NMR spectra of compound SI-2

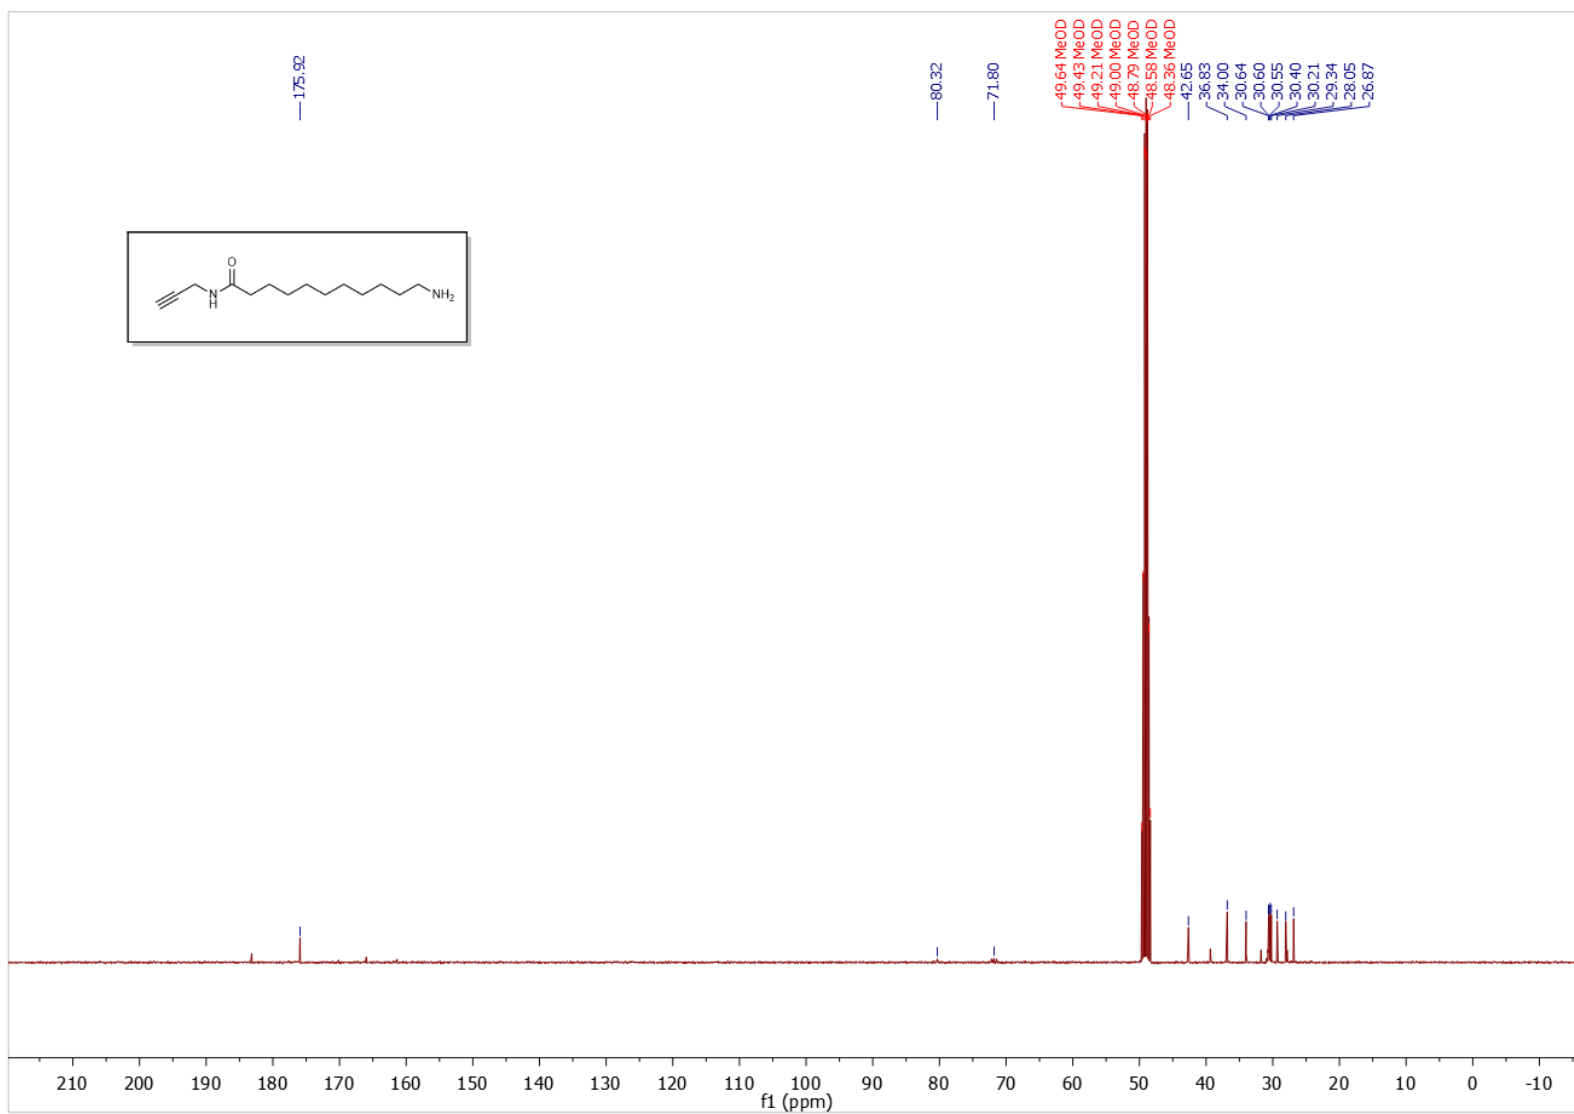

$^{13}\text{C}$  NMR spectra of compound SI-2

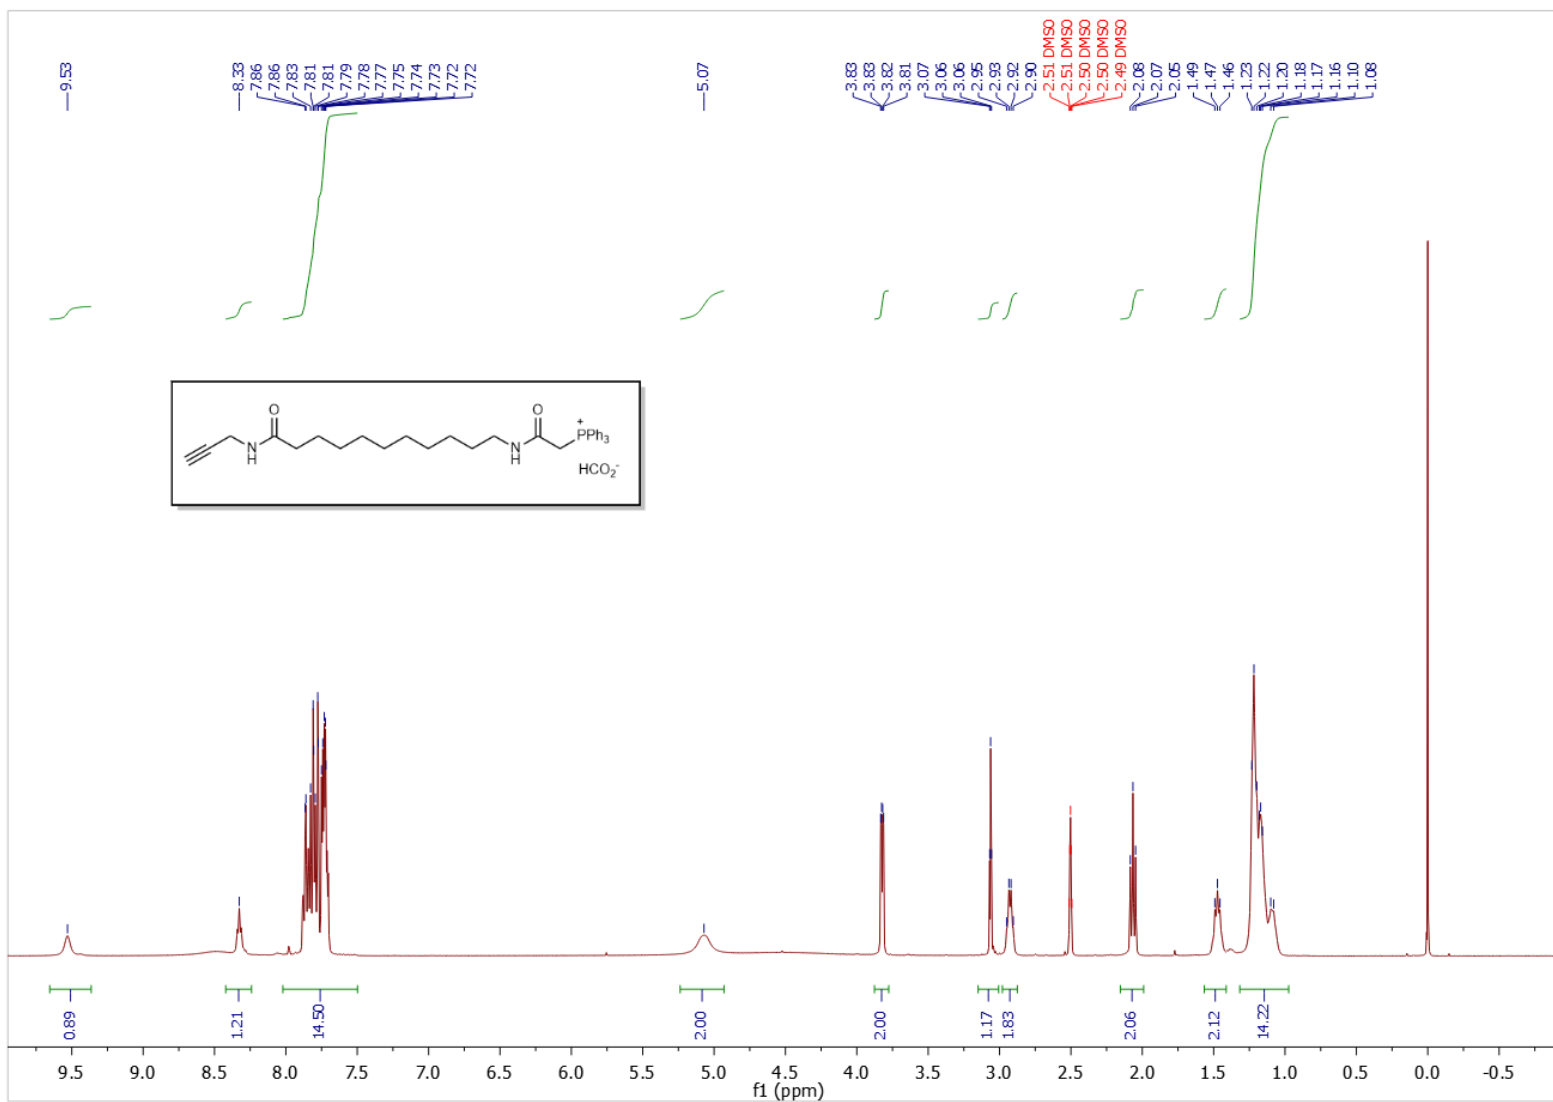

<sup>1</sup>H NMR spectra of compound 11



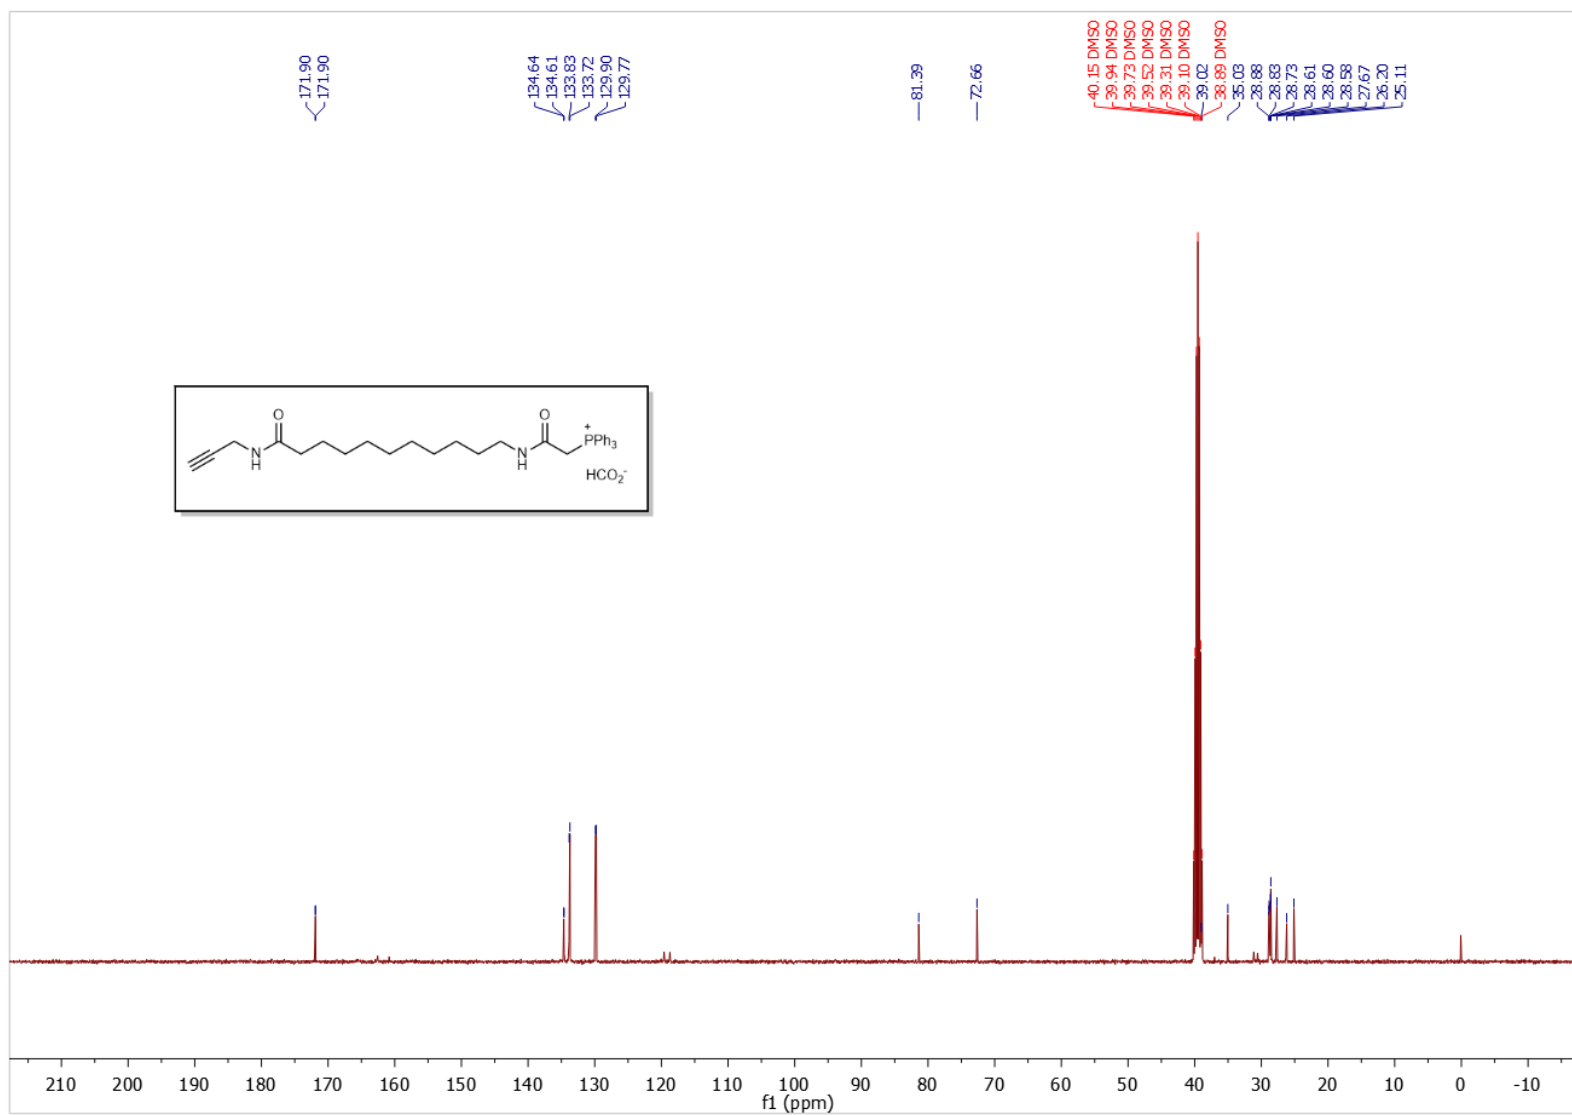

<sup>13</sup>C NMR spectra of compound **11**

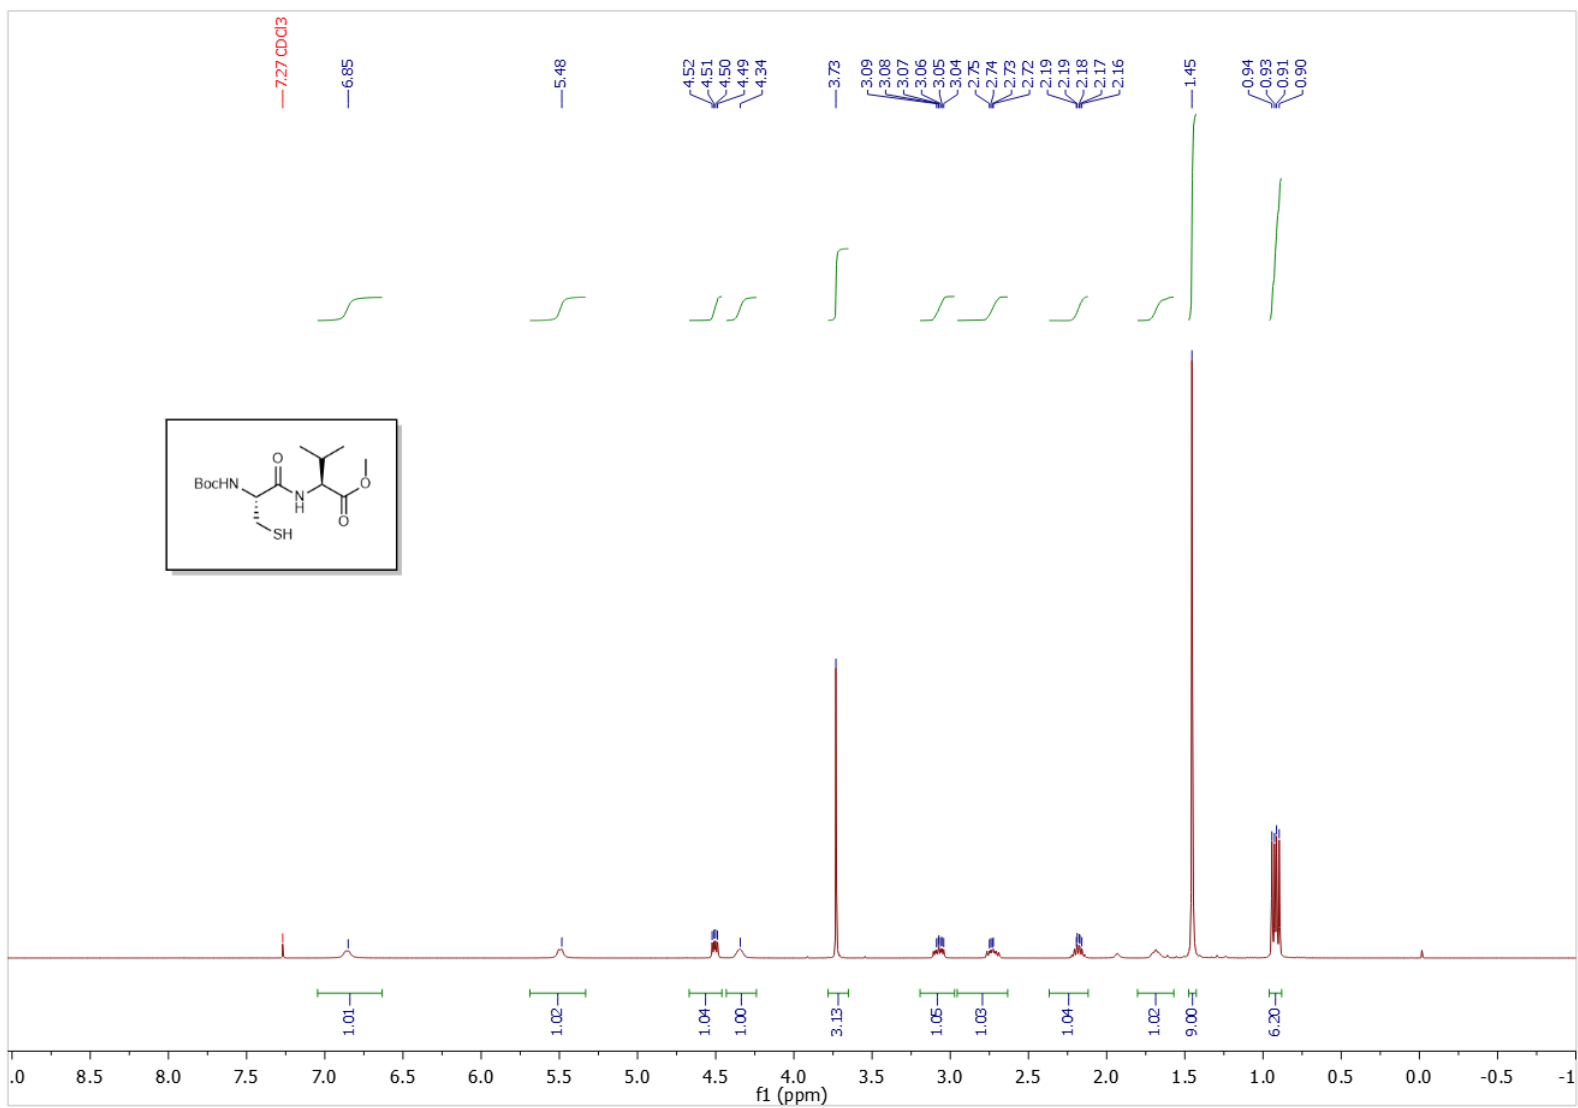

<sup>1</sup>H NMR spectra of compound SI-3

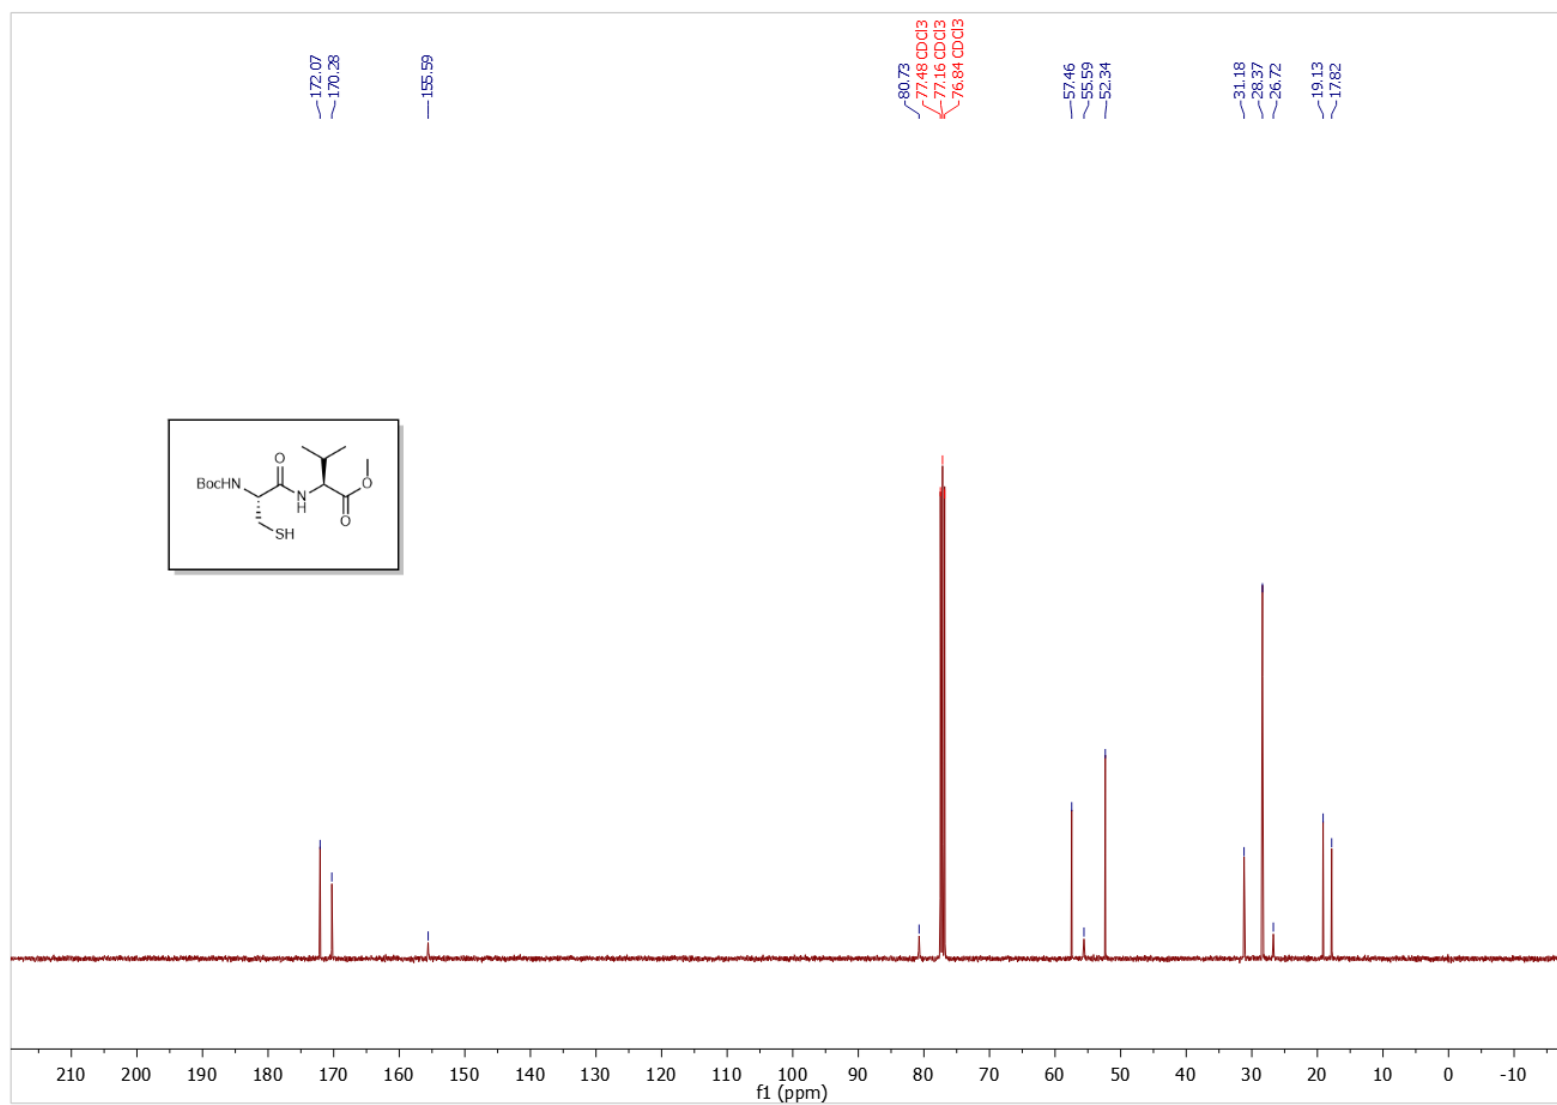

$^{13}\text{C}$  NMR spectra of compound SI-3

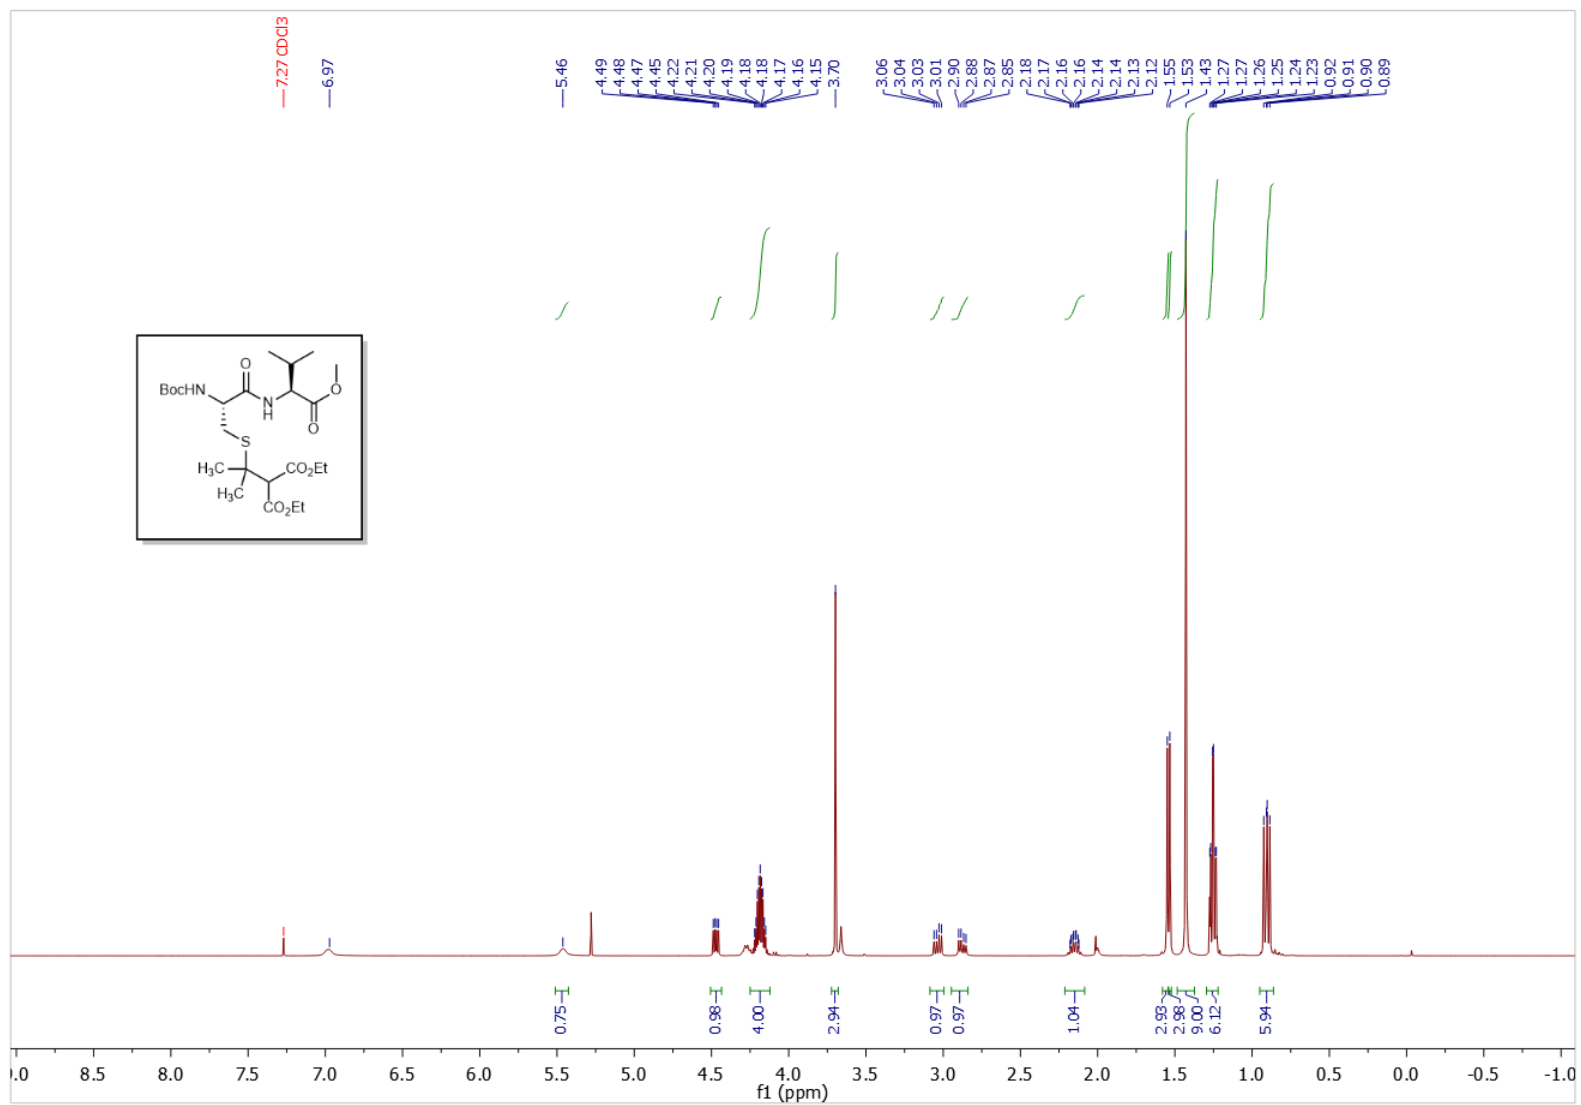

$^1\text{H}$  NMR spectra of compound **Boc12**

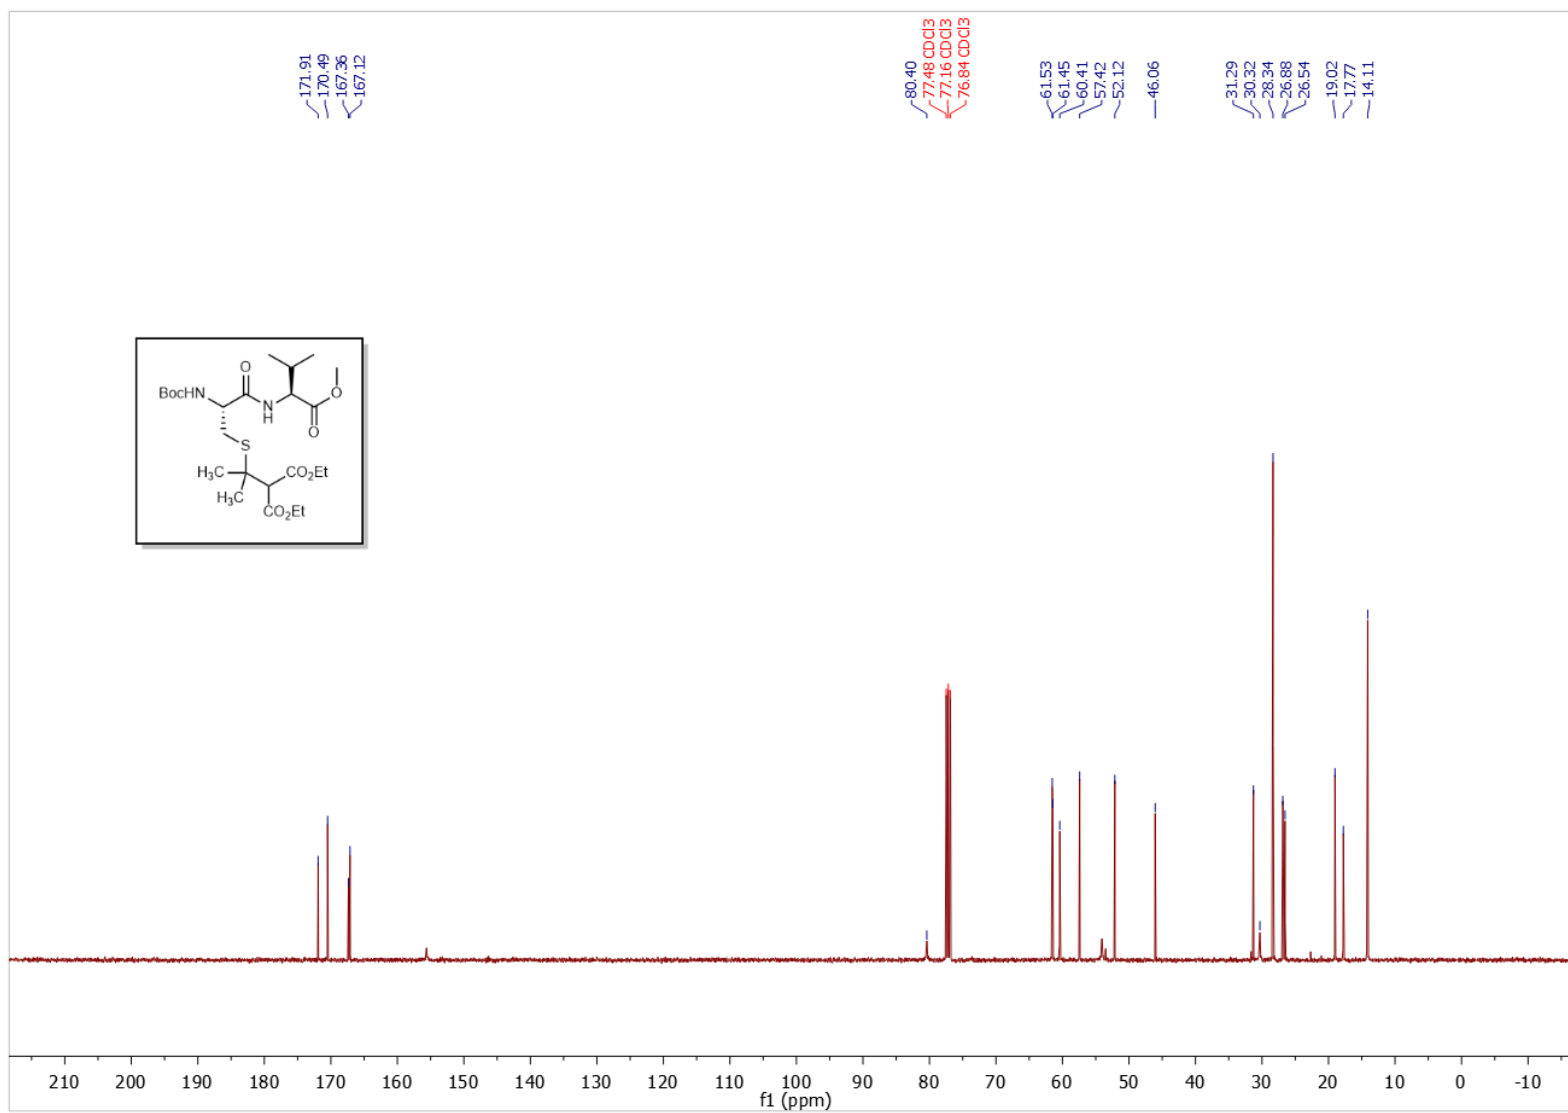

<sup>13</sup>C NMR spectra of compound **Boc12**

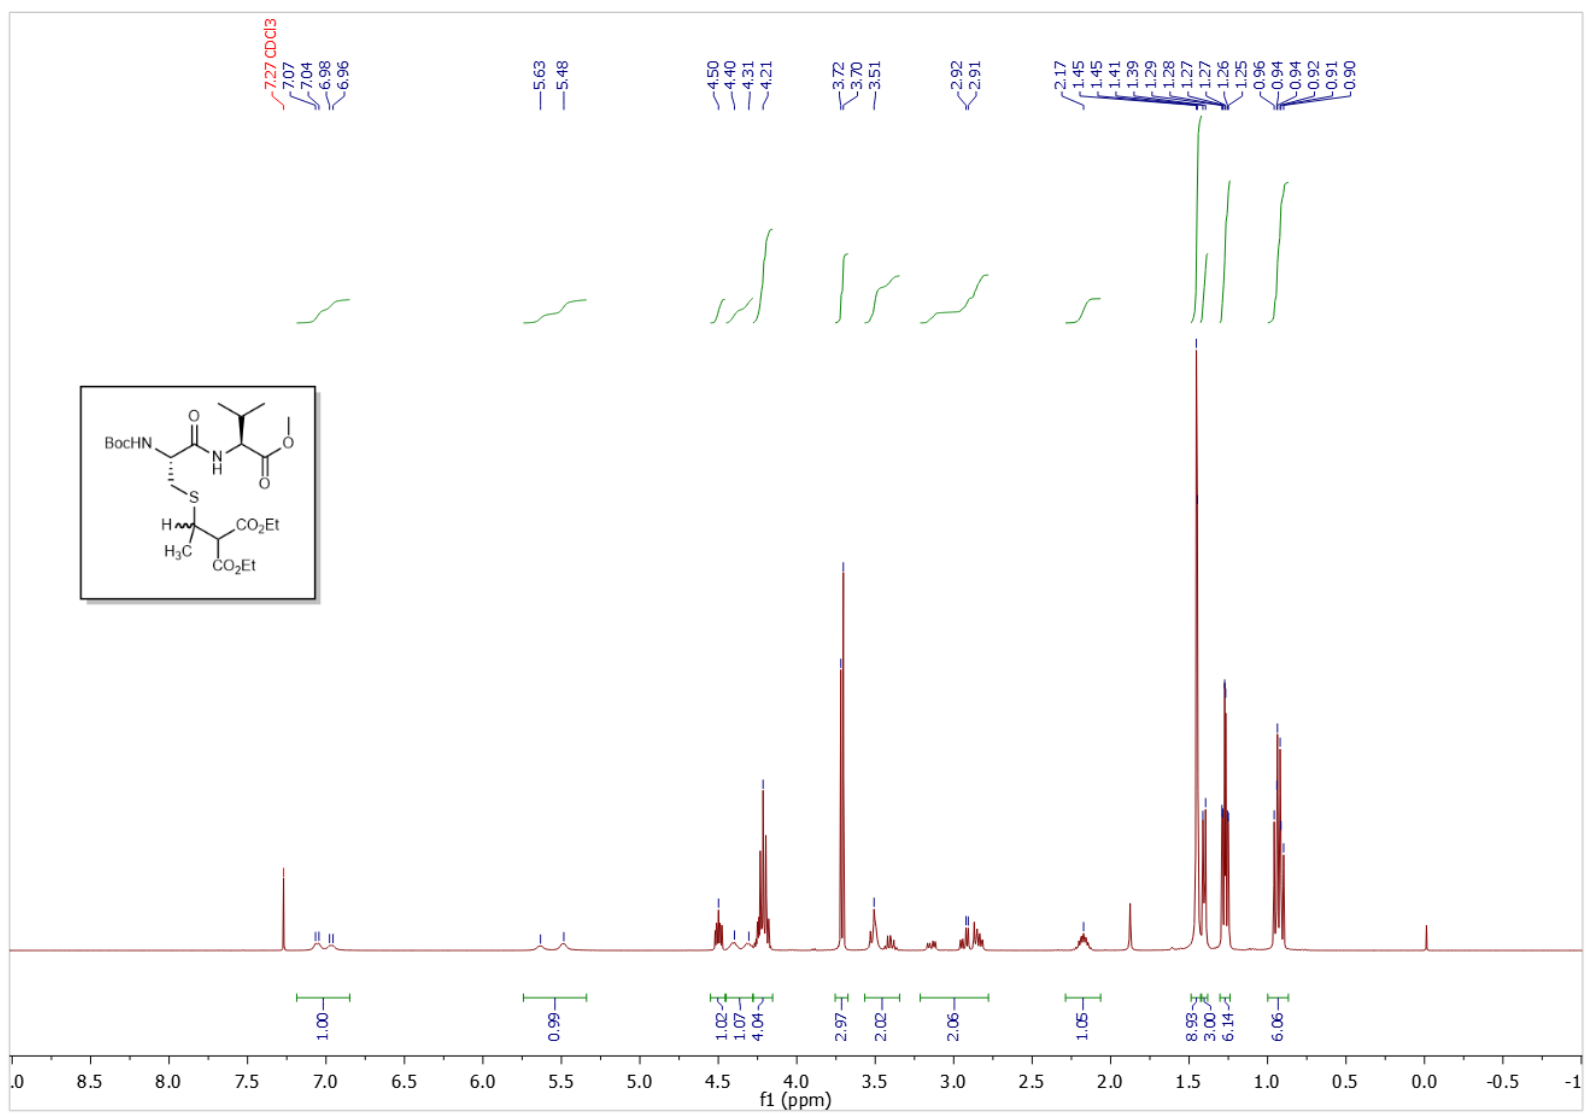

<sup>1</sup>H NMR spectra of compound **Boc13**

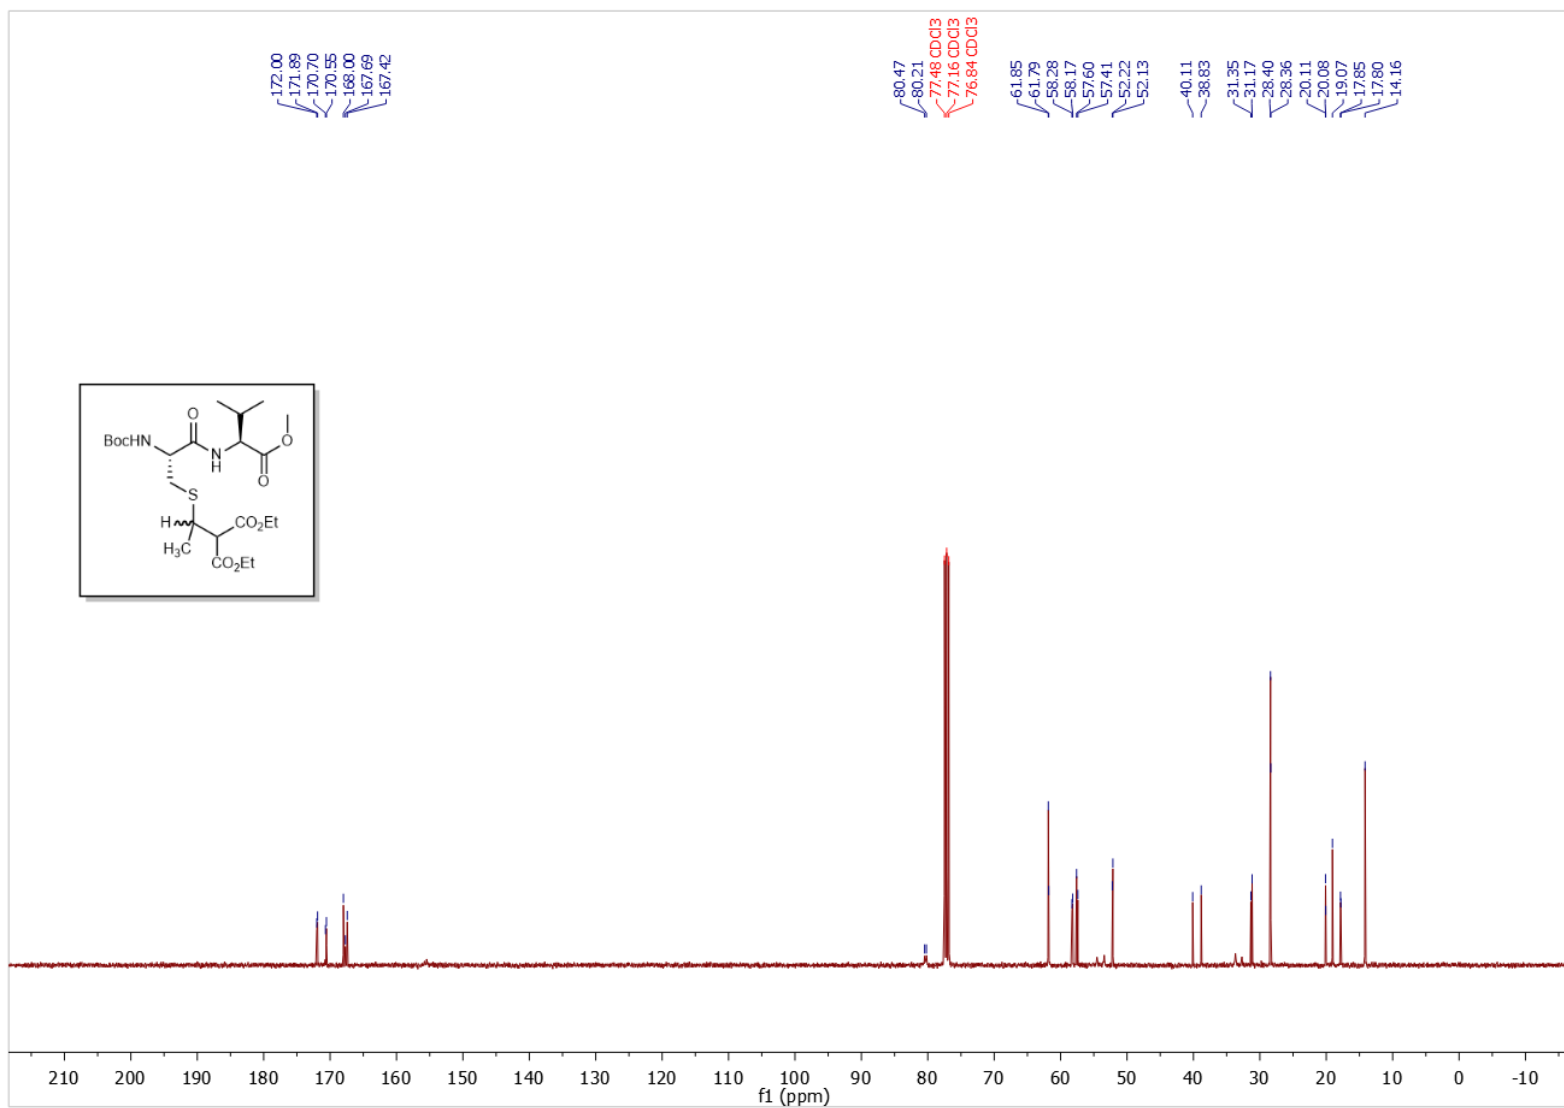

<sup>13</sup>C NMR spectra of compound **Boc13**

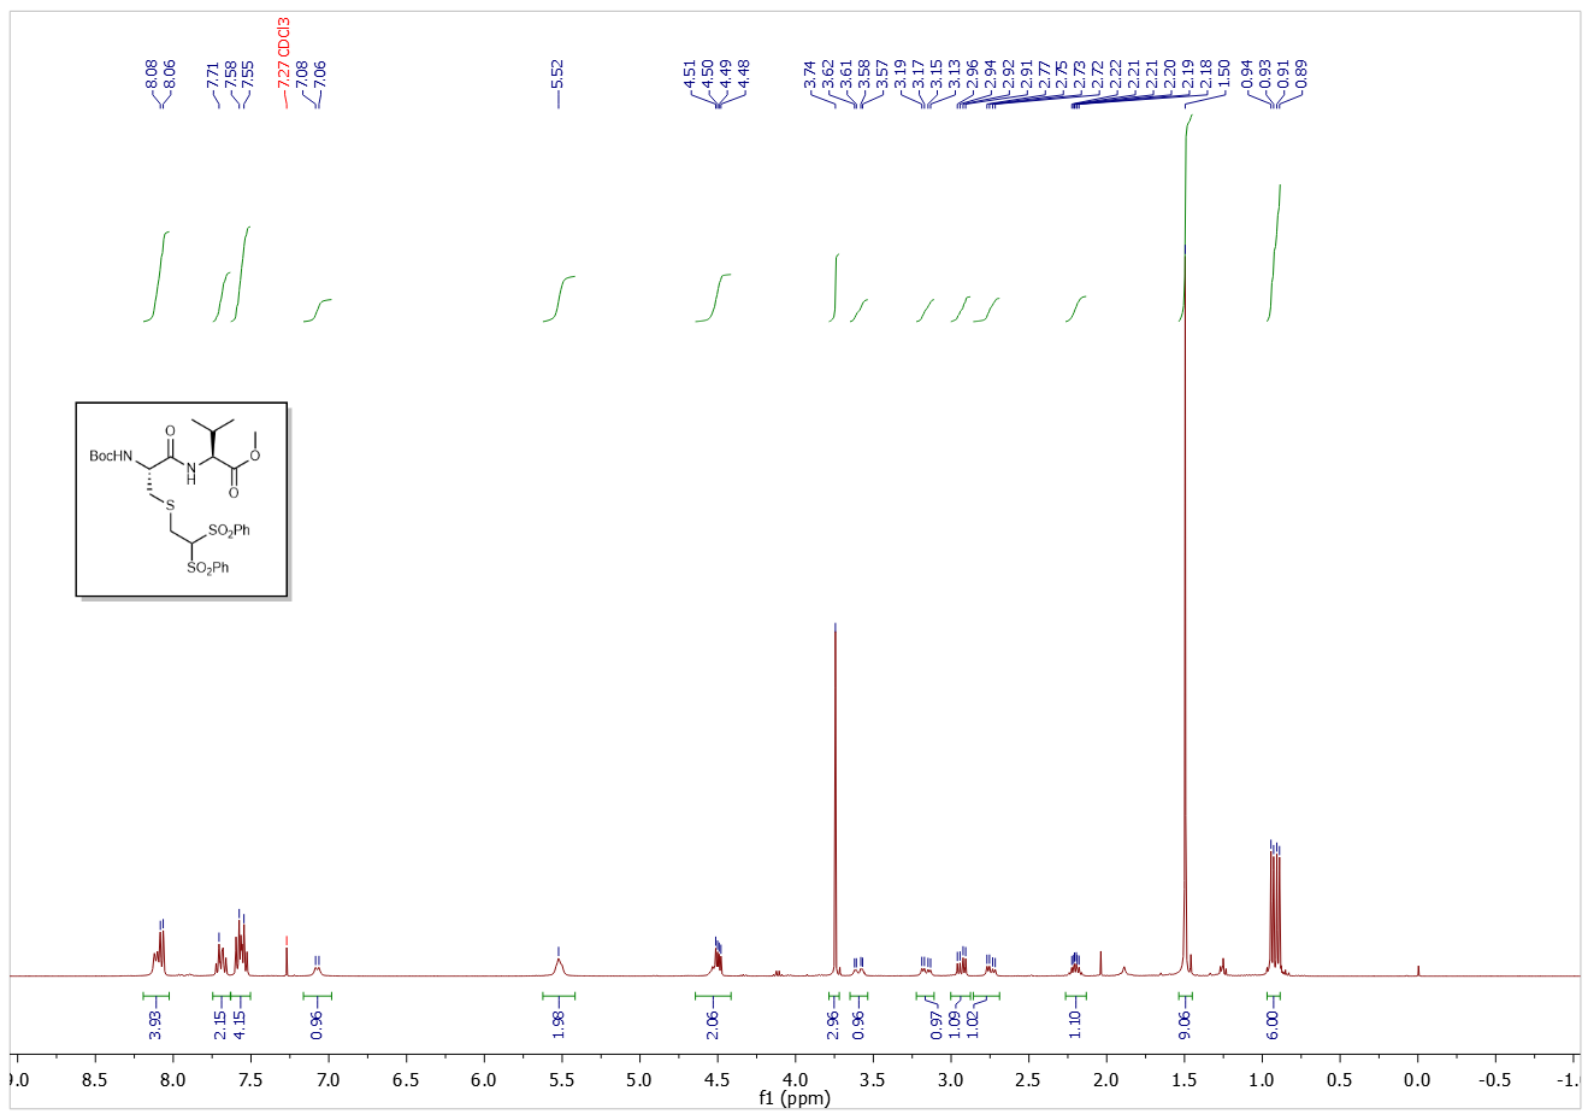

<sup>1</sup>H NMR spectra of compound **Boc14**





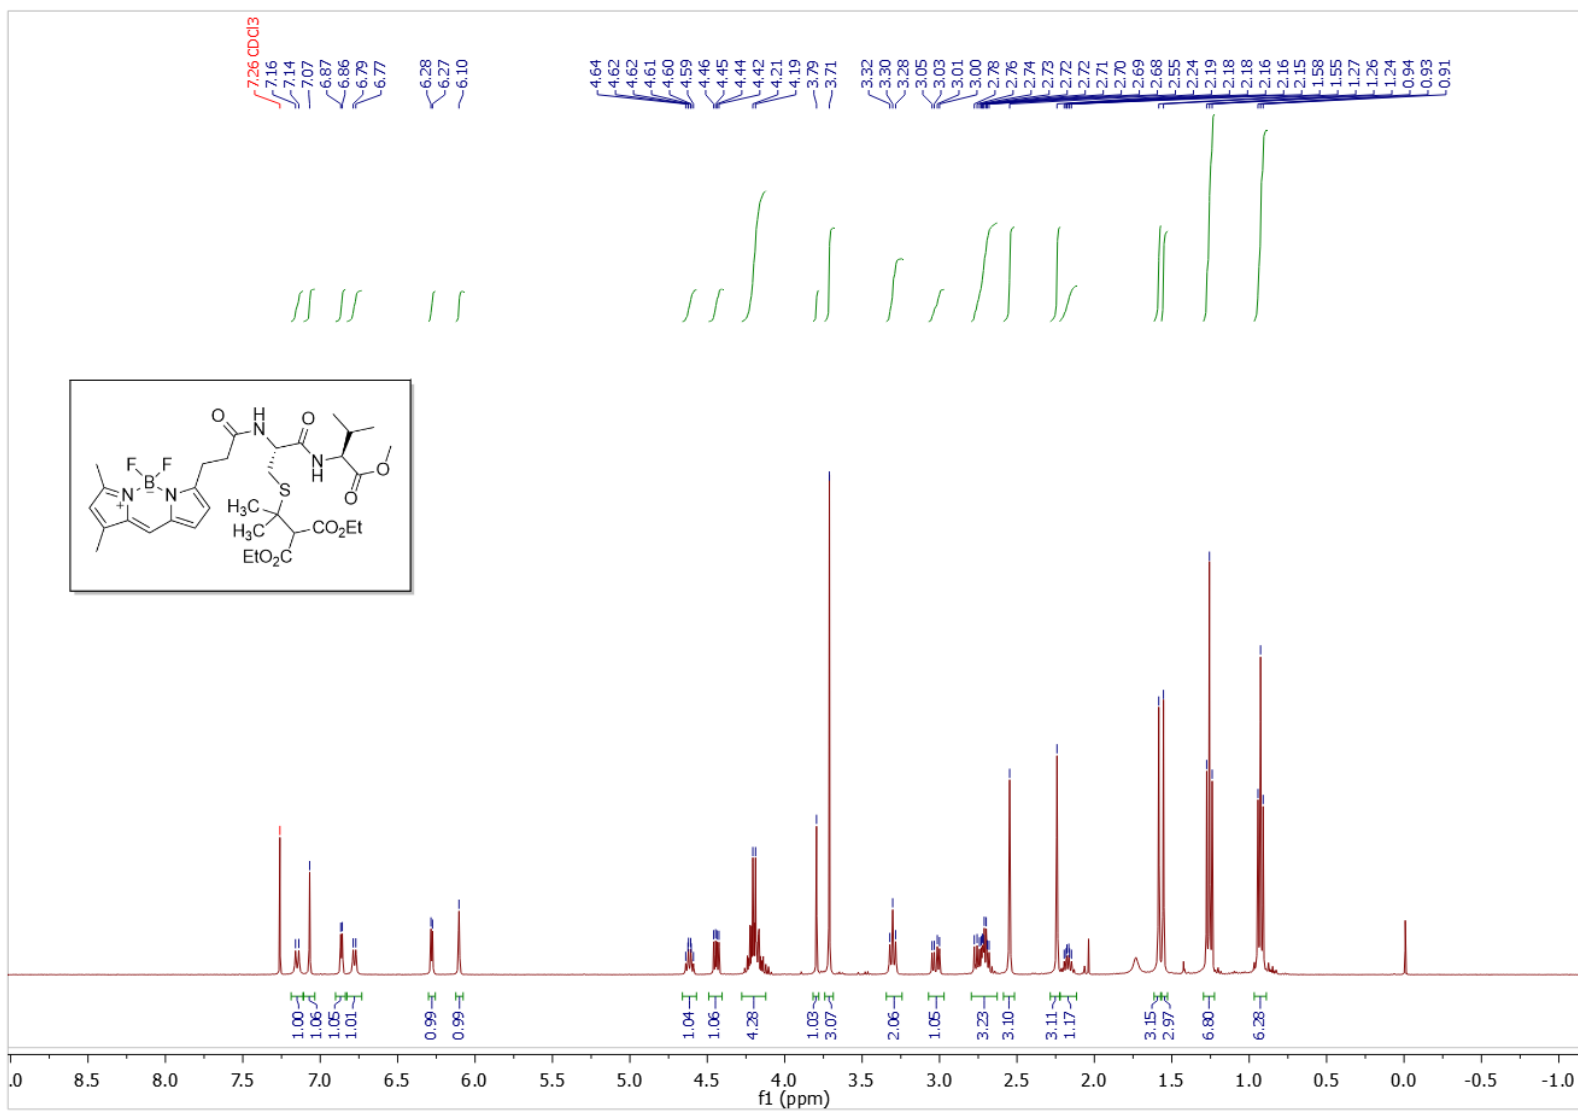

<sup>1</sup>H NMR spectra of compound 12

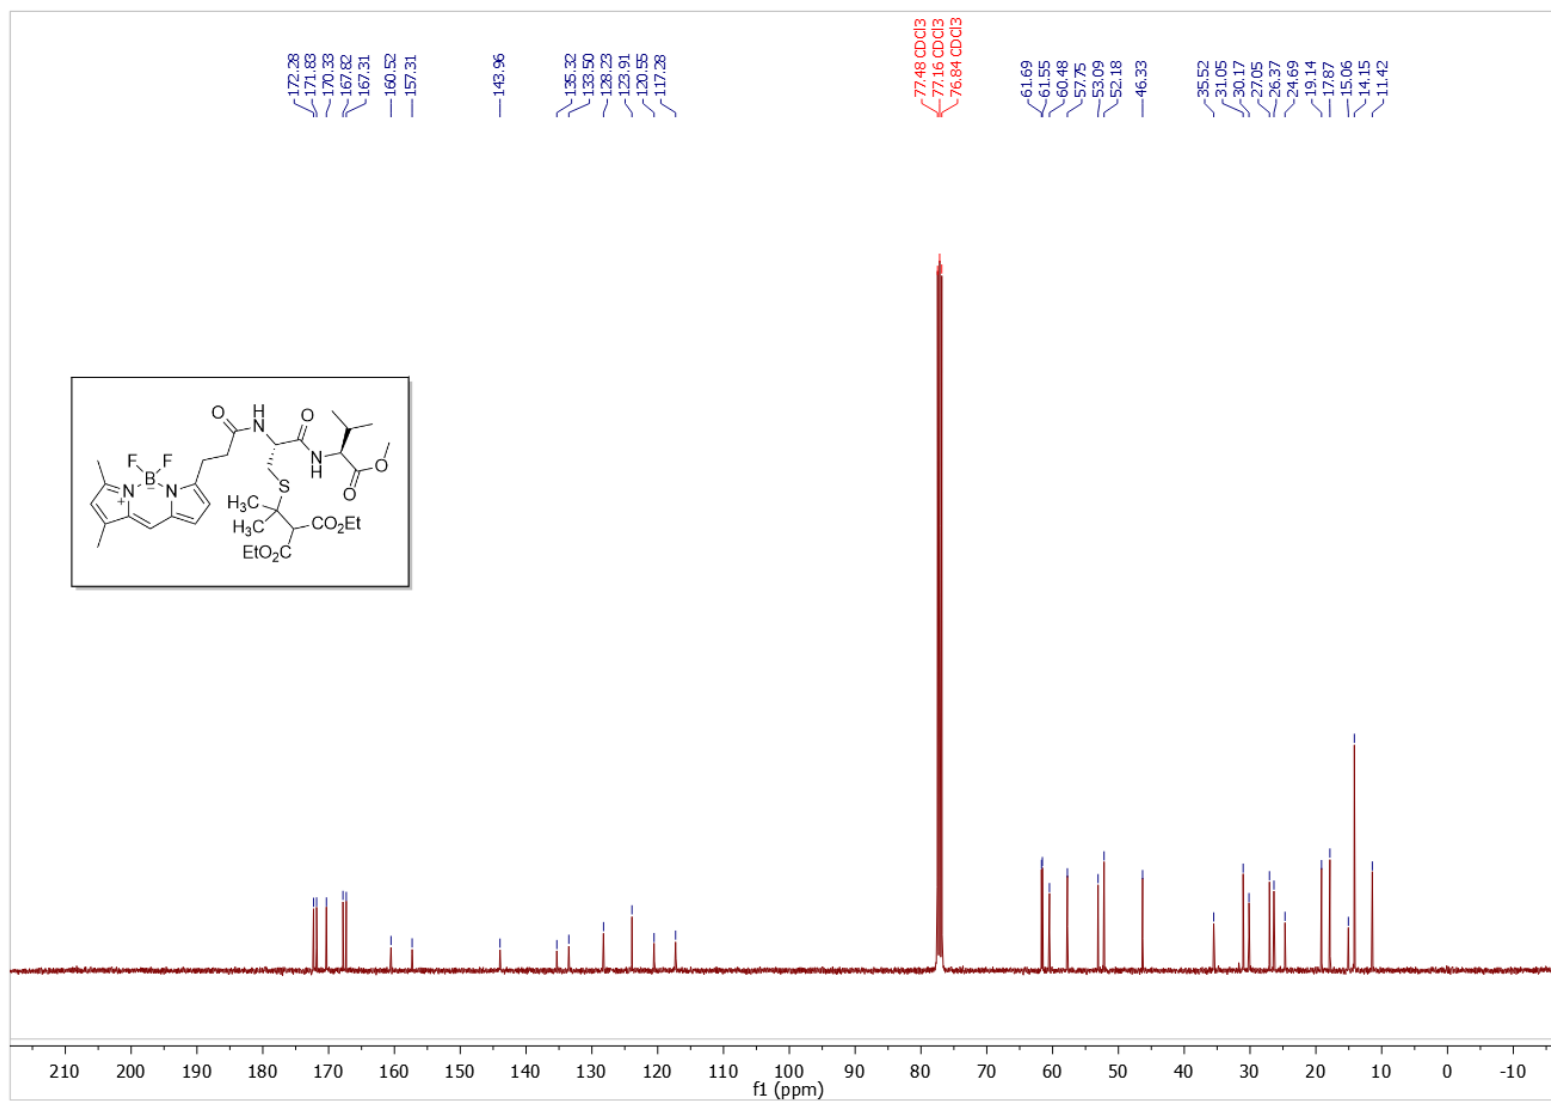

<sup>13</sup>C NMR spectra of compound 12

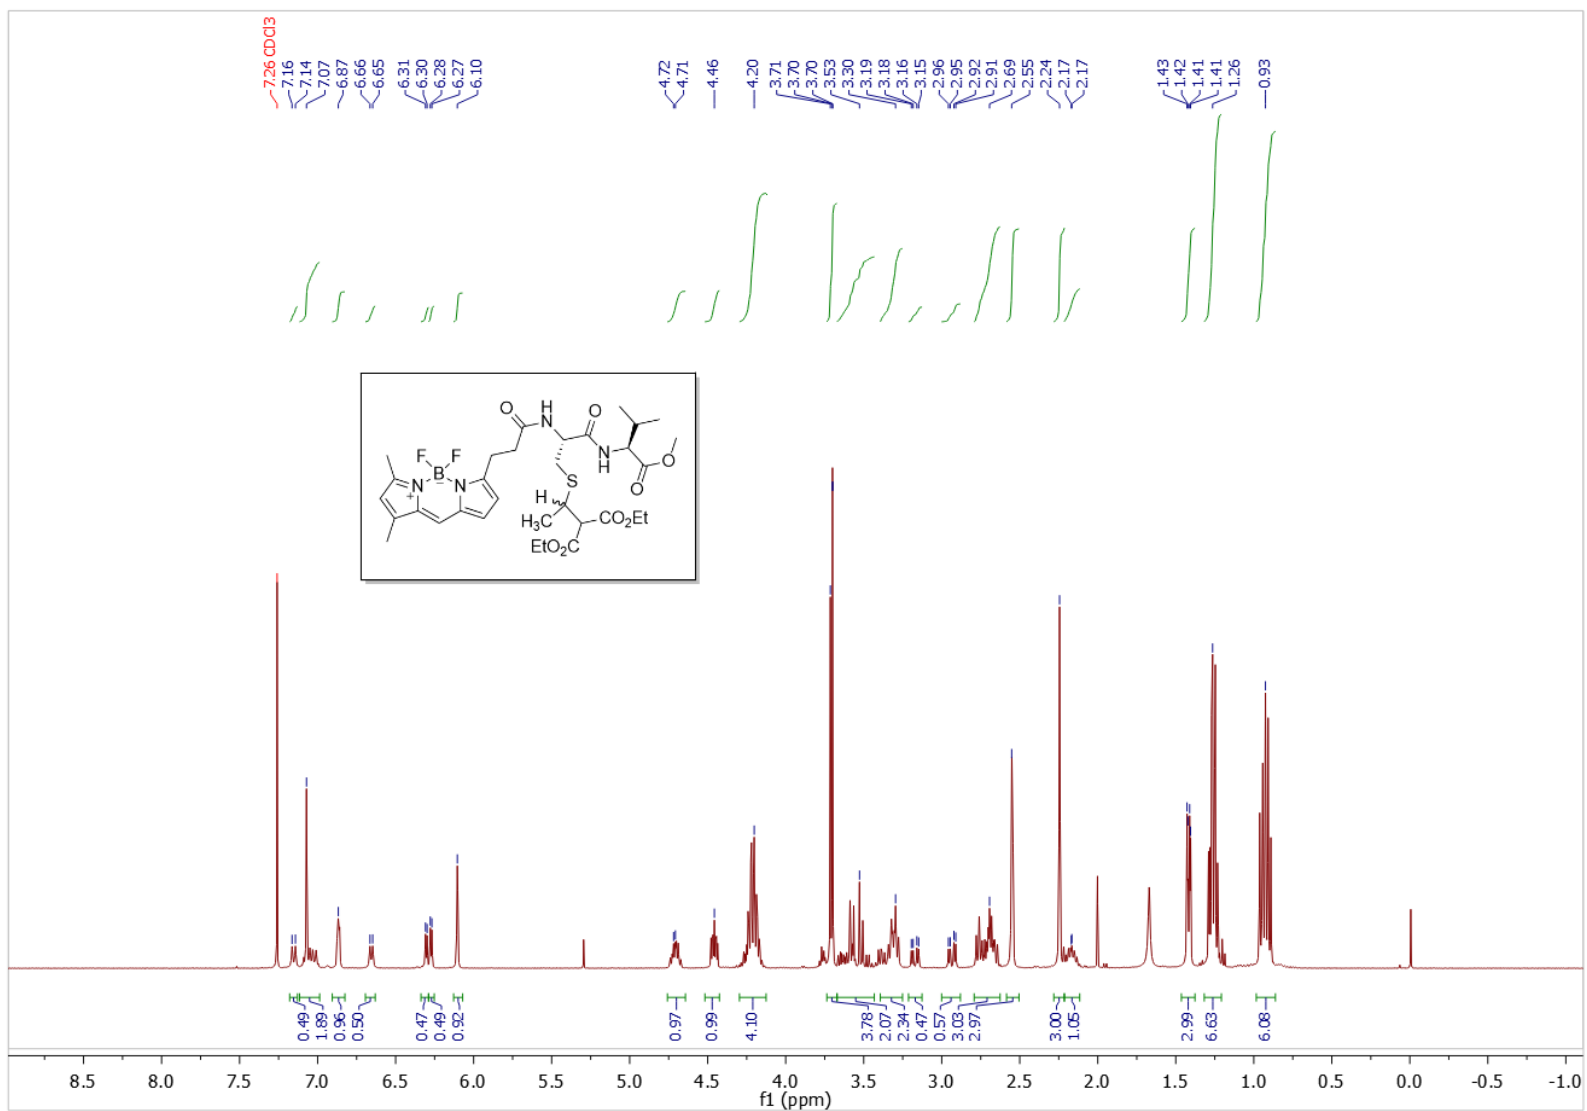

<sup>1</sup>H NMR spectra of compound **13**

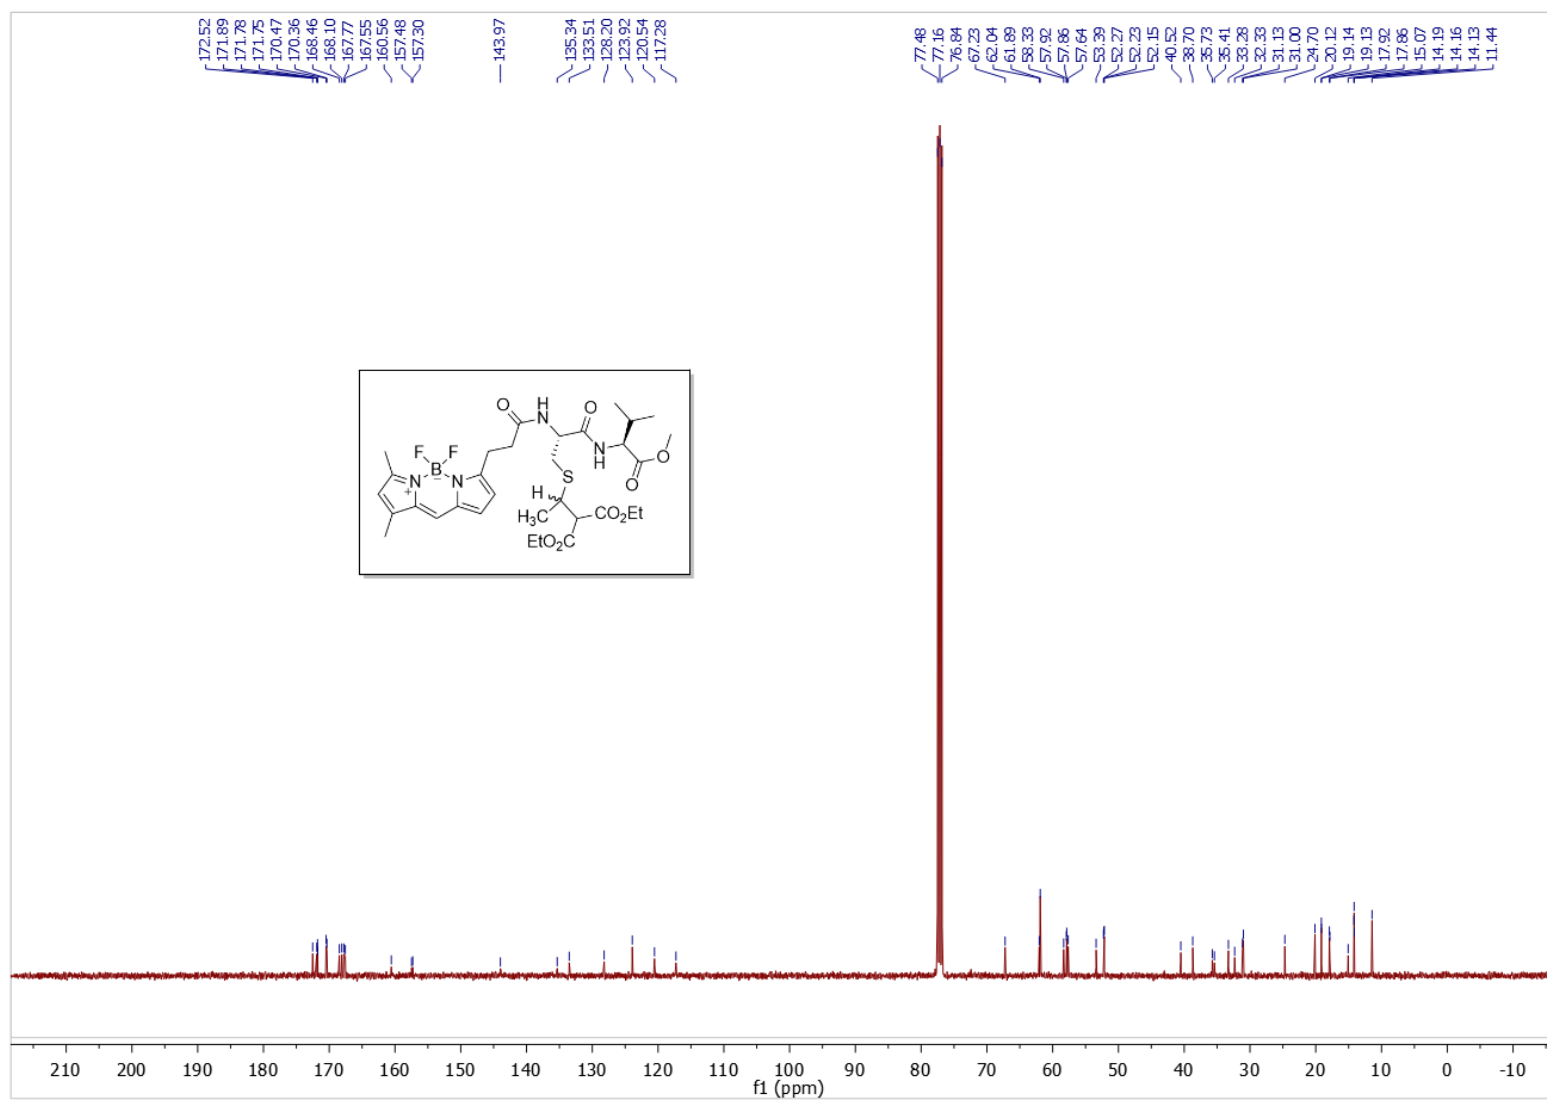

$^{13}\text{C}$  NMR spectra of compound **13**

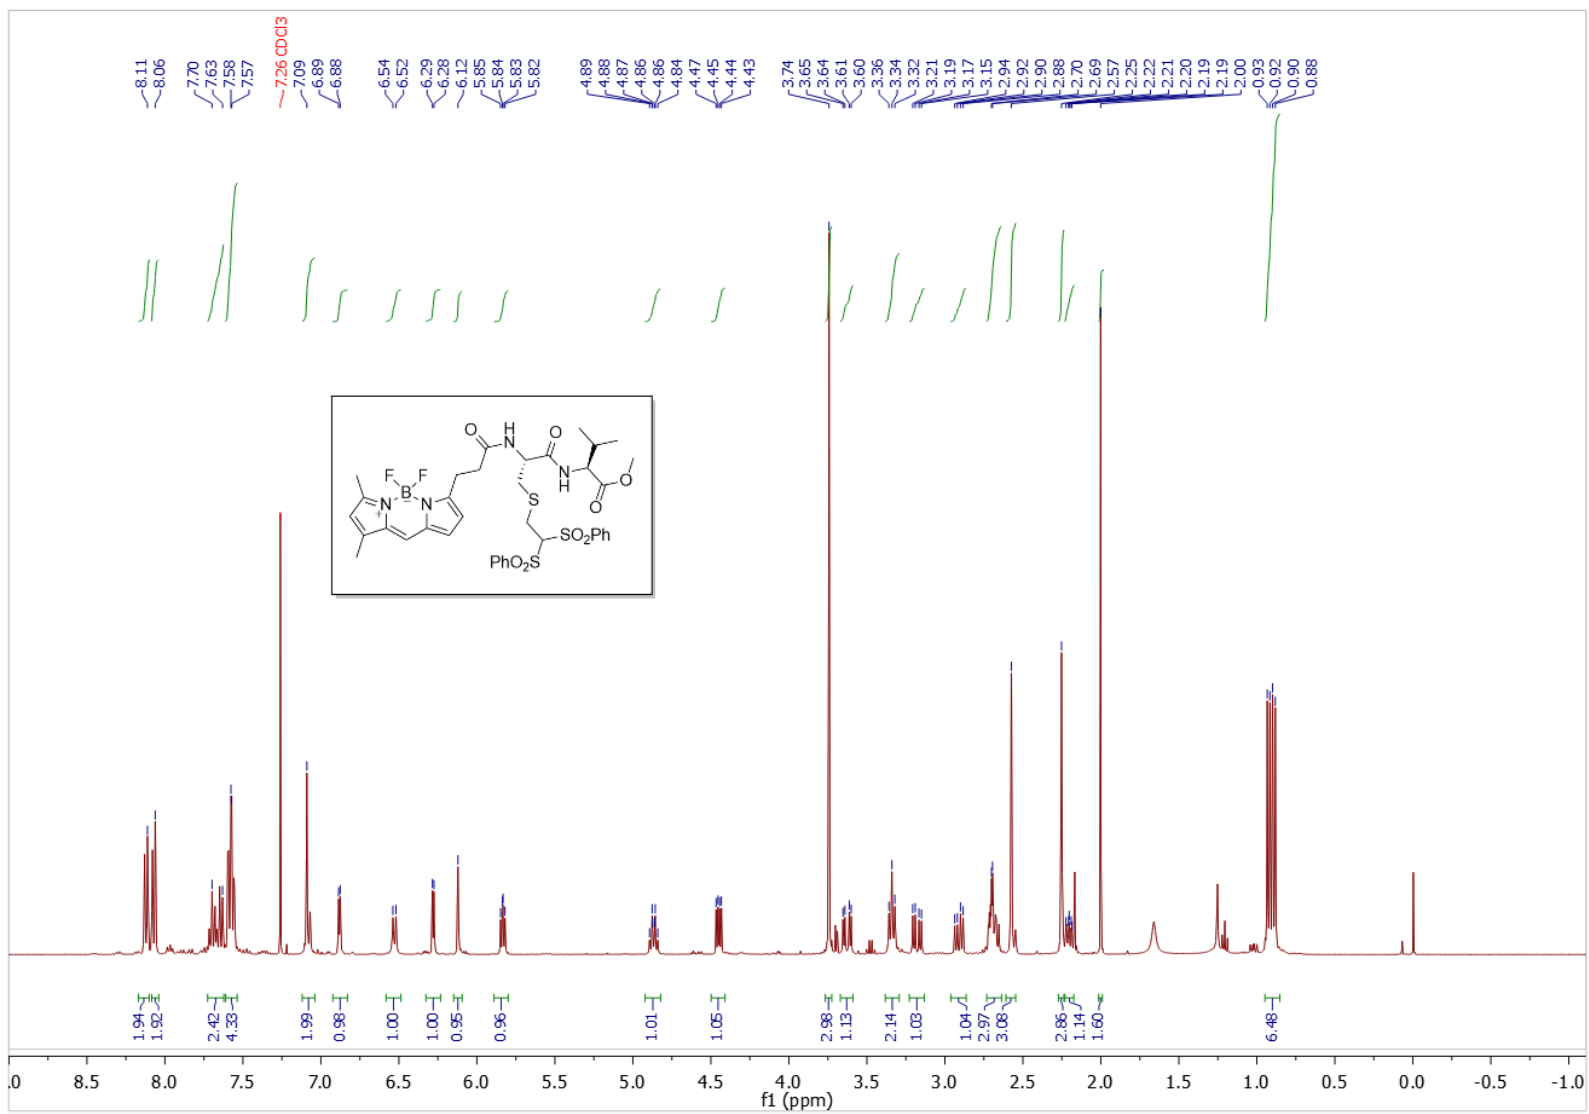

<sup>1</sup>H NMR spectra of compound **14**

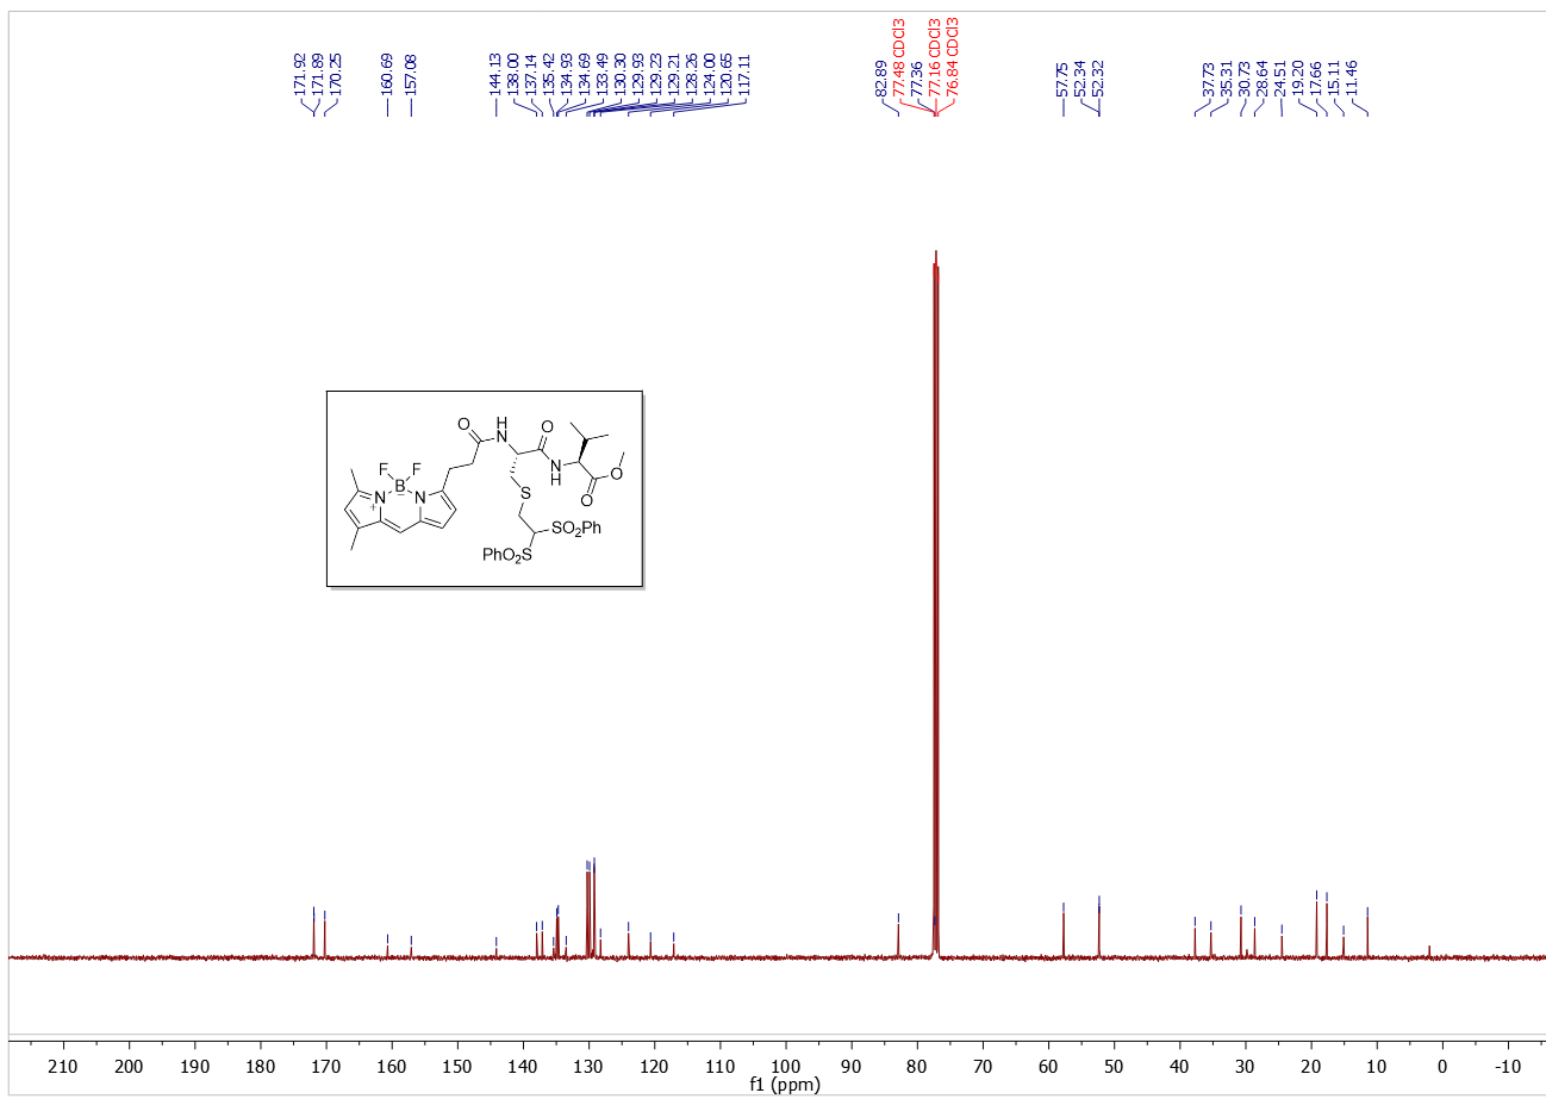

<sup>13</sup>C NMR spectra of compound **14**

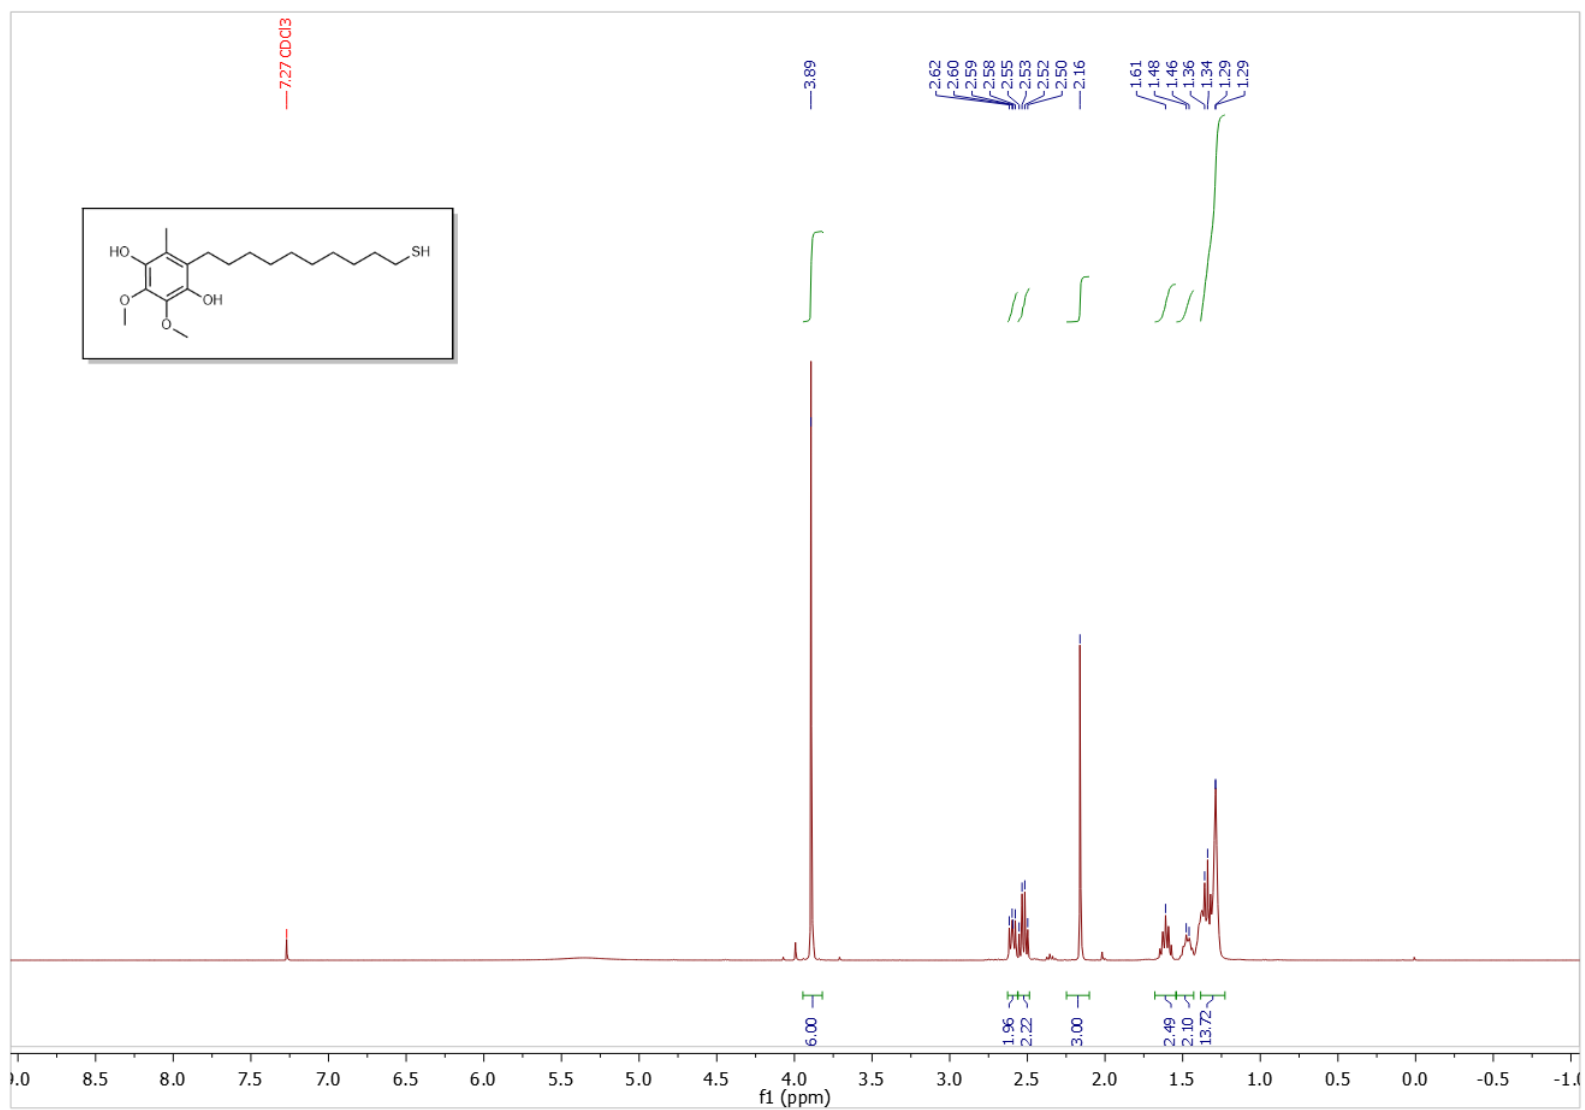

<sup>1</sup>H NMR spectra of compound **SI-4**



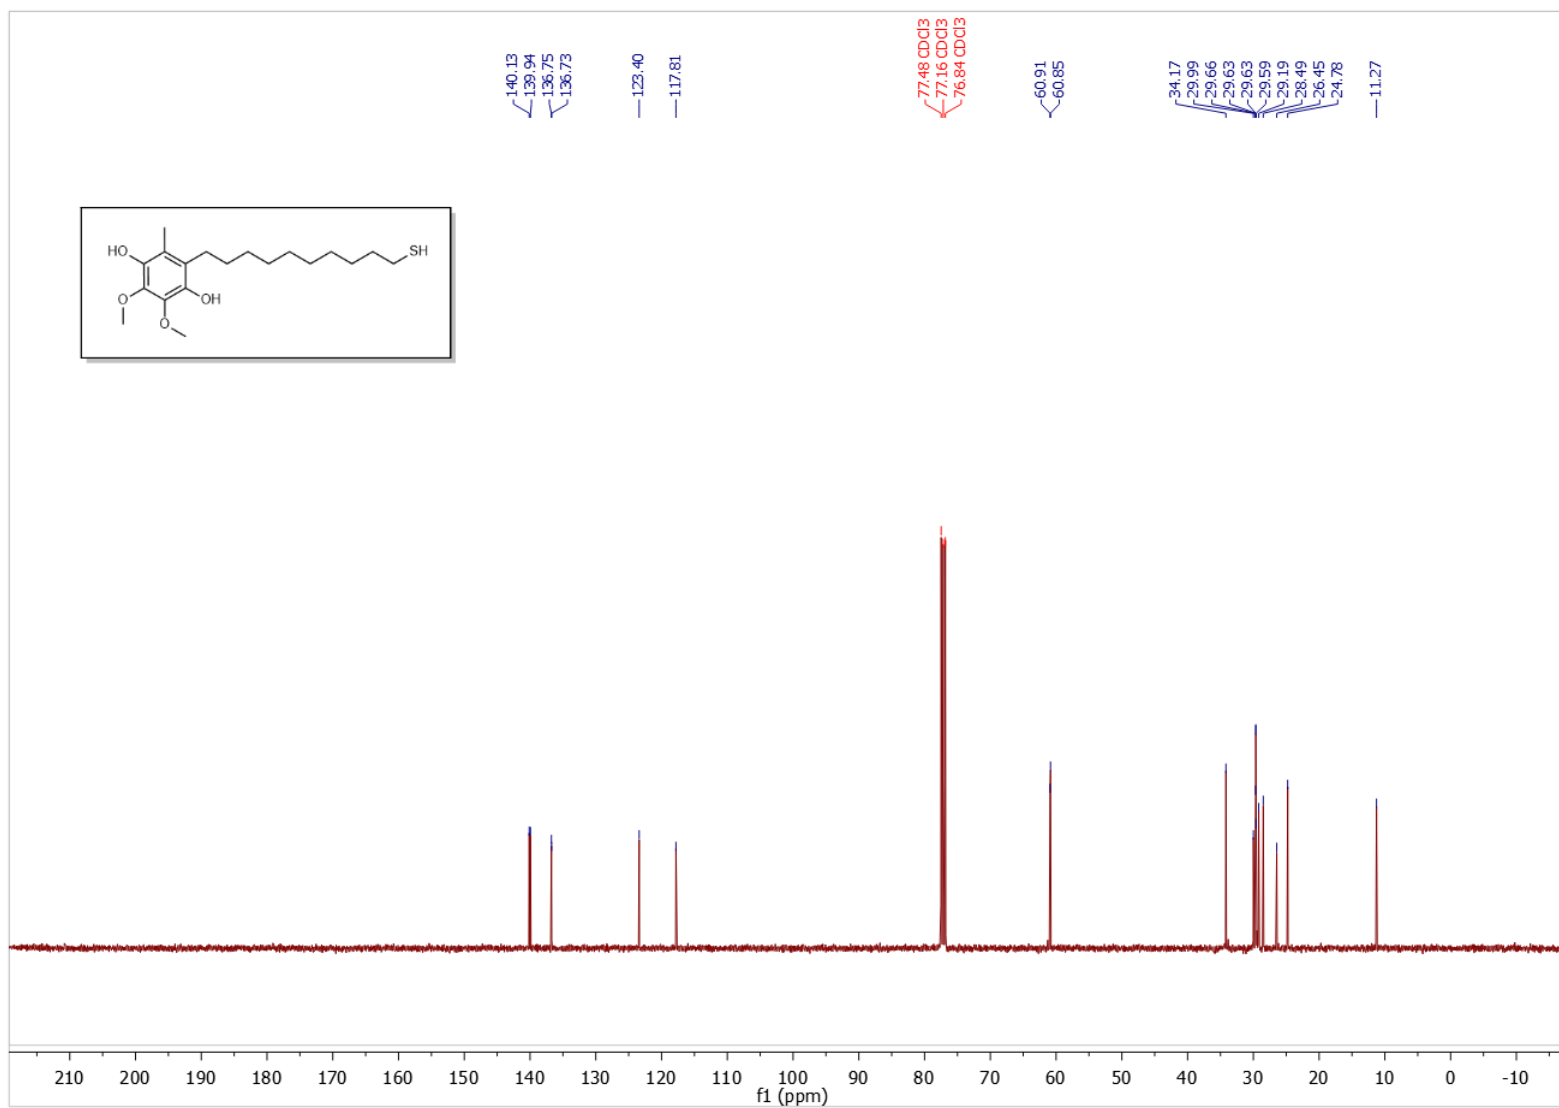

<sup>13</sup>C NMR spectra of compound **SI-4**

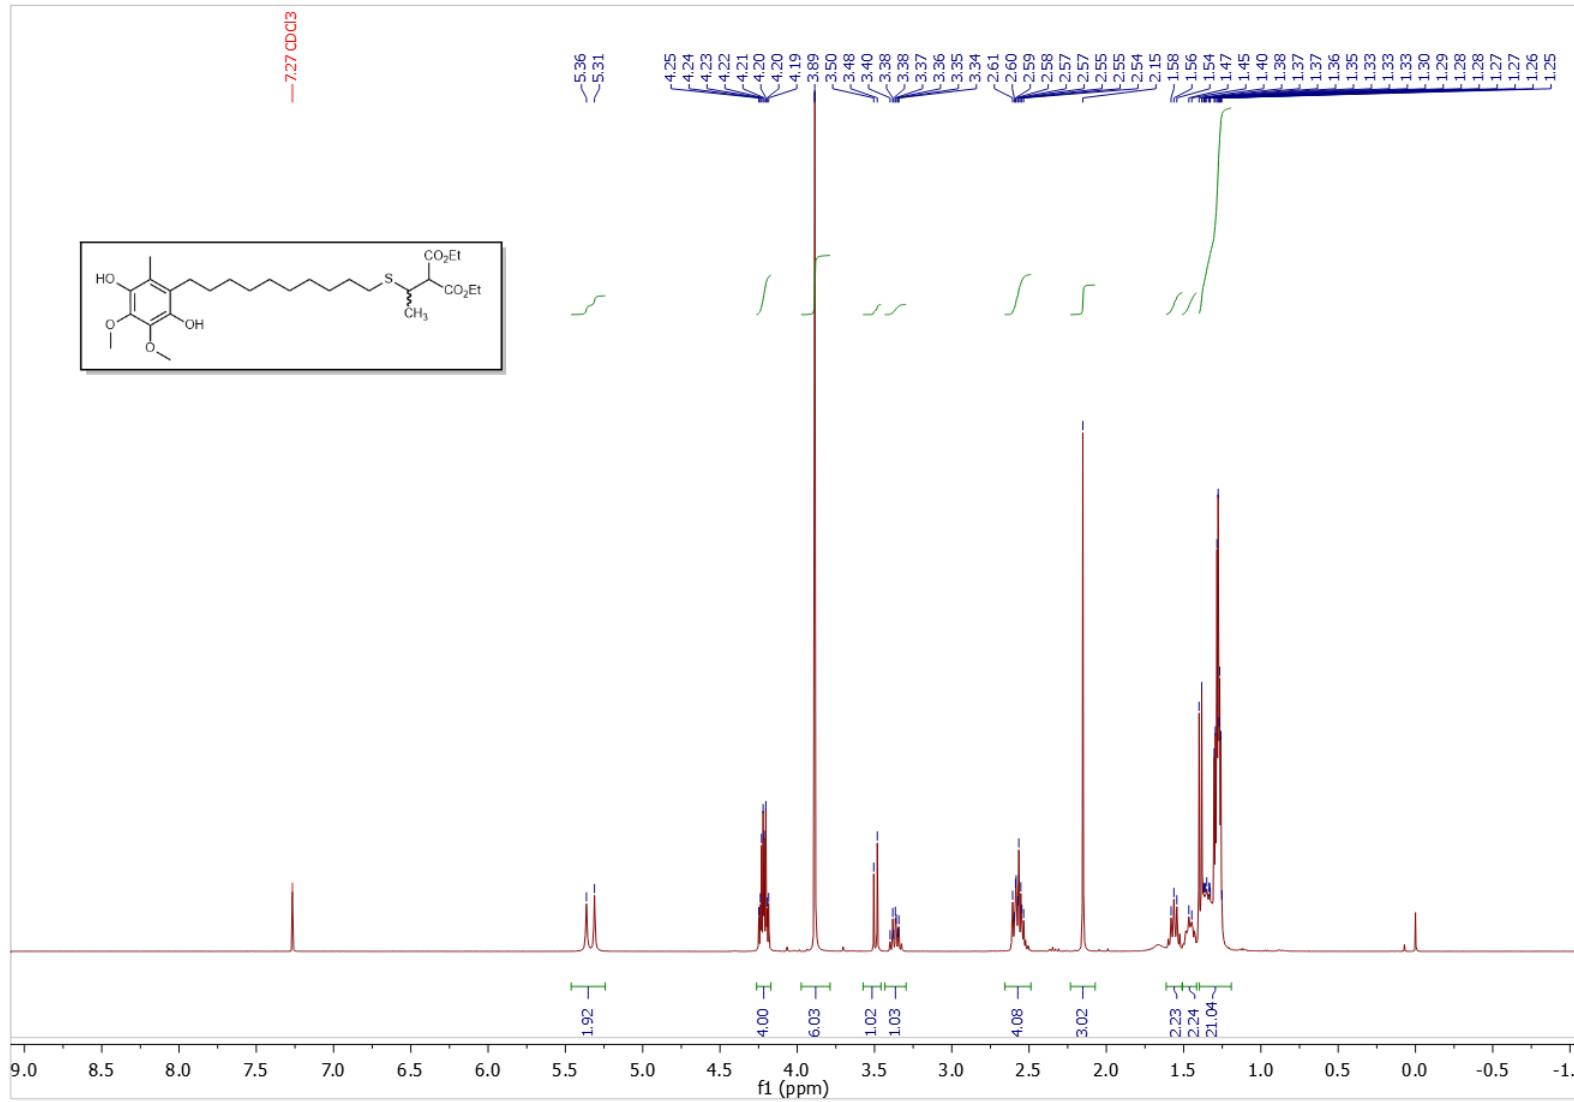

$^1\text{H}$  NMR spectra of compound **19**

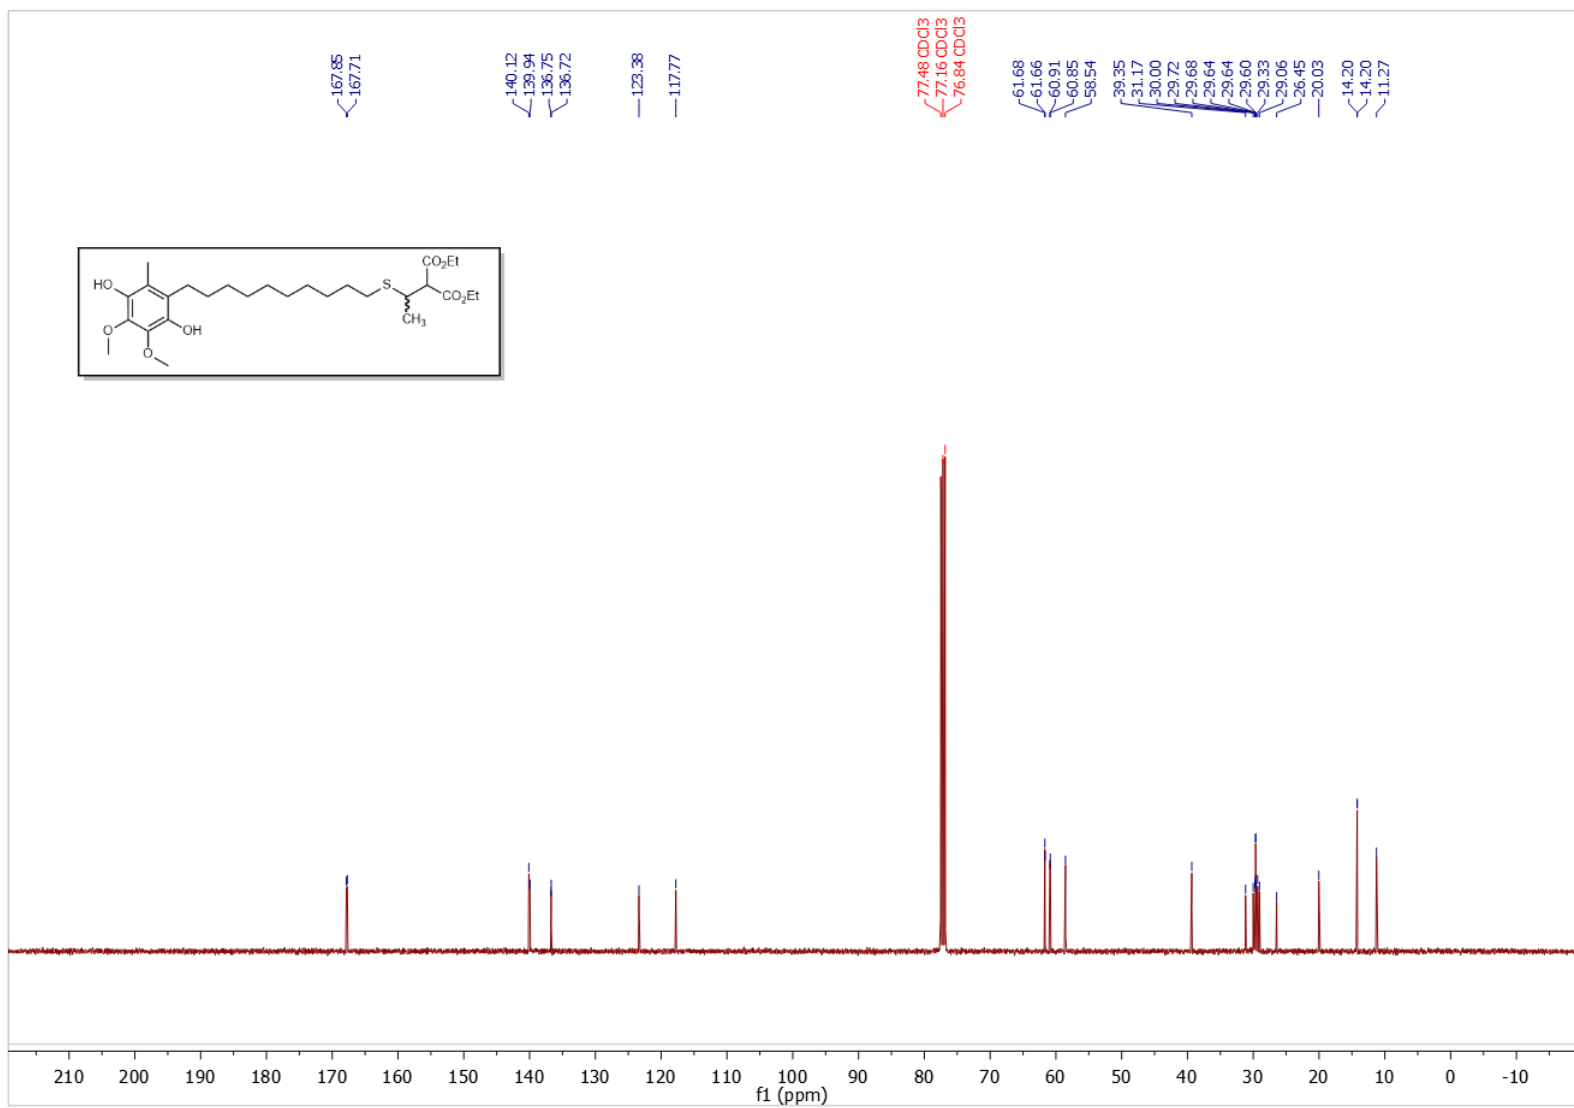

<sup>13</sup>C NMR spectra of compound **19**

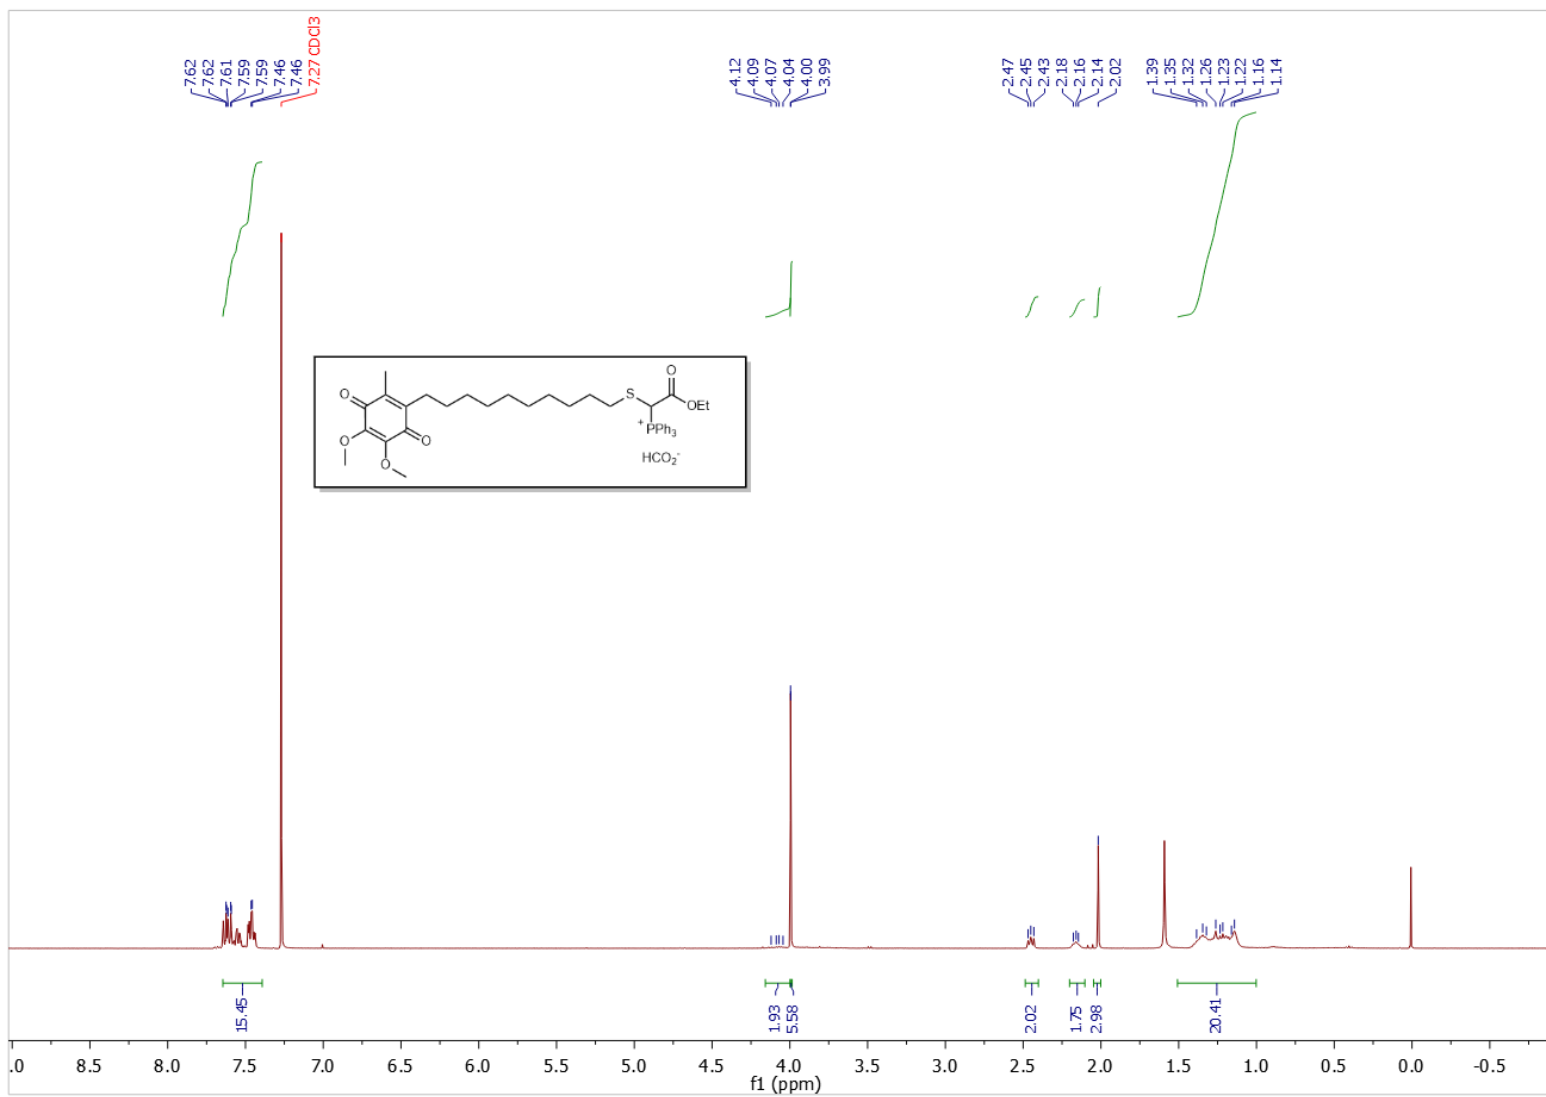

$^1\text{H}$  NMR spectra of compound **20**

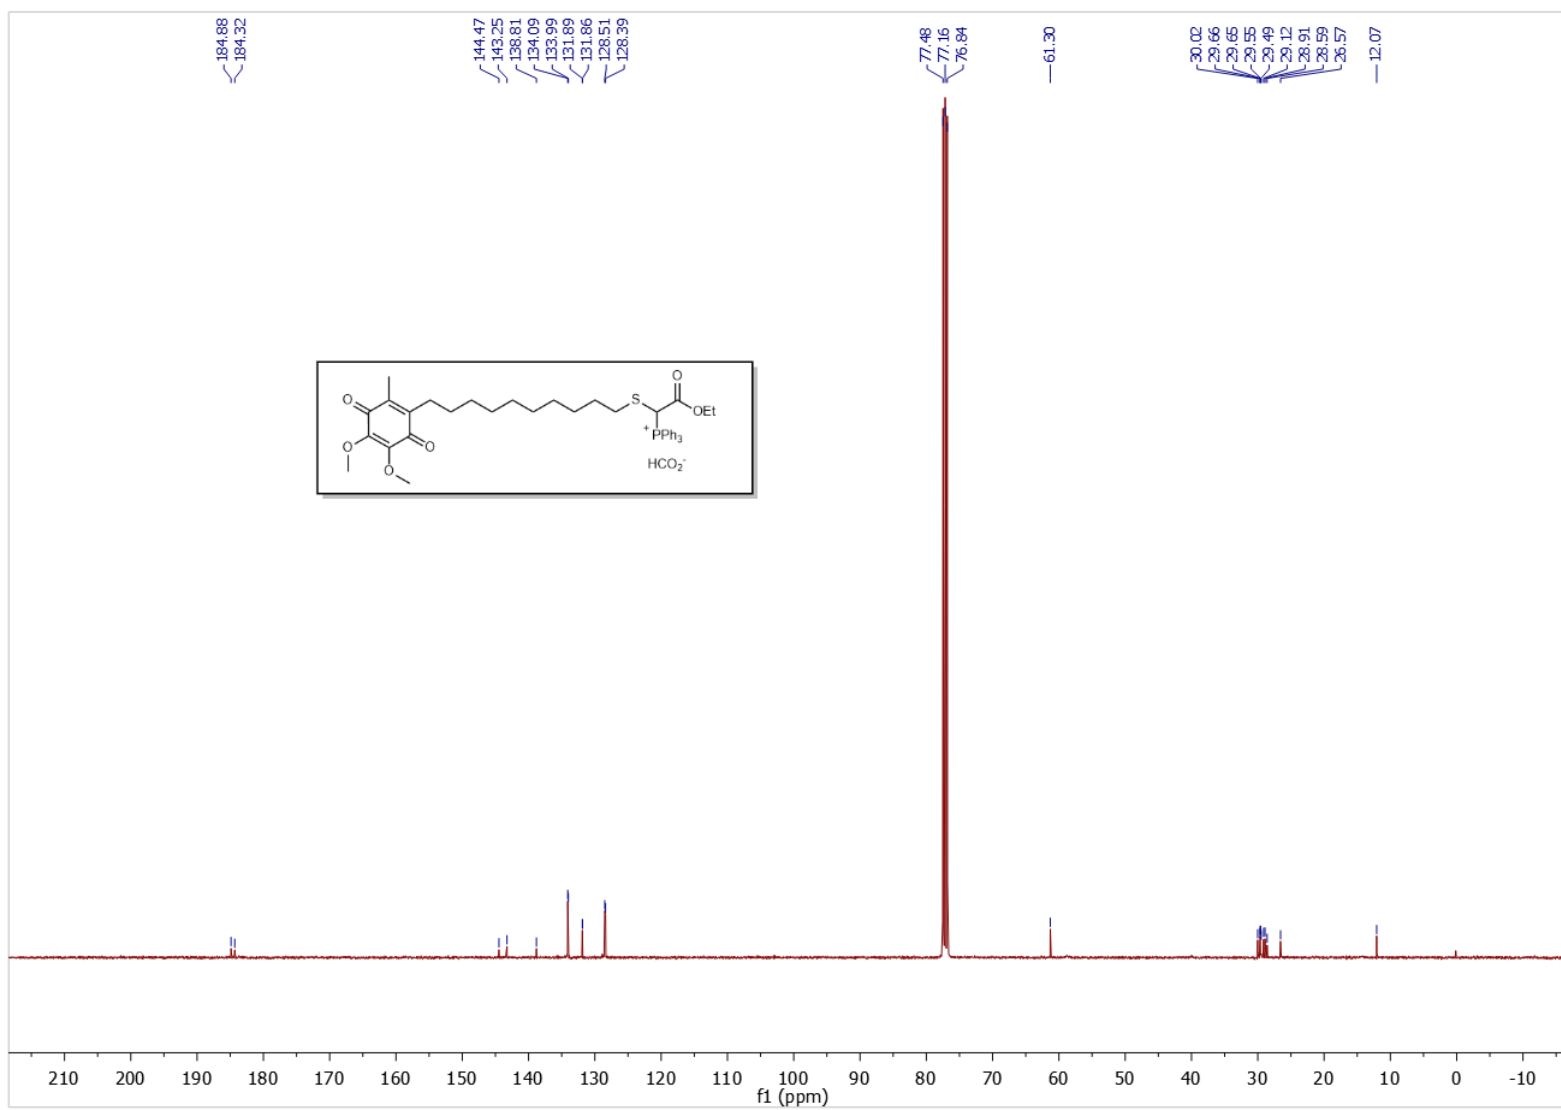

$^{13}\text{C}$  NMR spectra of compound **20**
