# Supplementary material for: Wittig reagents for chemoselective sulfenic acid ligation enables global site stoichiometry analysis and redox-controlled mitochondrial targeting
Source: Research Square preprint supplement (doi:10.21203/rs.3.rs-110280/v1), 2020-11-30
Supplement: Supplementary file 2 [file c74a430eb4ddae555c3dbb86.xlsx]

## Sheet: Legend
Supplementary Table 3. WYneN-based in situ S-sulfenylome analysis. Intact A549 cells were stimulated with or without H2O2 (1 mM, 15 min, 37°C) and labeled with 0.5 mM of WYneN for 1h at 37°C in situ. The WYneN-labeled proteome was then processed into tryptic peptides. The resulting probe-labeled peptides were conjugated with both light (H2O2) and heavy (Control) azido-UV-cleavable-biotin (Az-UV-b…

## Sheet: H2O2
Rank	Uniprot accession #	Site #	Description	R1(L/H)	R2(L/H)	R3(L/H)	R4(L/H)	Ratio ave.lh	SD	Log2 R lh	Function annotations	Notes
1	P49207	83	RL34_HUMAN 60S ribosomal protein L34 OS=Homo sapiens OX=9606 GN=RPL34 PE=1 SV=3	7.14286	3.91832	ND	ND	5.53059	2.28009	2.46743
2	Q9ULC4	14	MCTS1_HUMAN Malignant T-cell-amplified sequence 1 OS=Homo sapiens OX=9606 GN=MCTS1 PE=1 SV=1	5.26316	ND	ND	5	5.13158	0.186082	2.3594
3	P62937	161	PPIA_HUMAN Peptidyl-prolyl cis-trans isomerase A OS=Homo sapiens OX=9606 GN=PPIA PE=1 SV=2	ND	3.44828	ND	5.55556	4.50192	1.49007	2.17054
4	Q9Y3U8	48	RL36_HUMAN 60S ribosomal protein L36 OS=Homo sapiens OX=9606 GN=RPL36 PE=1 SV=3	ND	4	ND	ND	4		2
5	P56381	19	ATP5E_HUMAN ATP synthase subunit epsilon, mitochondrial OS=Homo sapiens OX=9606 GN=ATP5F1E PE=1 SV=2	ND	ND	3.84615	ND	3.84615		1.94342
6	P00352	126	AL1A1_HUMAN Retinal dehydrogenase 1 OS=Homo sapiens OX=9606 GN=ALDH1A1 PE=1 SV=2	4.7619	3.44828	2.7027	4.16667	3.76989	0.891412	1.91452
7	P11142	603	HSP7C_HUMAN Heat shock cognate 71 kDa protein OS=Homo sapiens OX=9606 GN=HSPA8 PE=1 SV=1	3.33333	3.7037	3.84615	3.84615	3.68233	0.242165	1.88062
8	Q9UHD1	157	CHRD1_HUMAN Cysteine and histidine-rich domain-containing protein 1 OS=Homo sapiens OX=9606 GN=CHORDC1 PE=1 SV=2	ND	ND	3.57143	ND	3.57143		1.8365	Metal binding	Note=Zinc 3;Ontology_term=ECO:0000255;evidence=ECO:0000255|PROSITE-ProRule:PRU00734
9	P04083	263	ANXA1_HUMAN Annexin A1 OS=Homo sapiens OX=9606 GN=ANXA1 PE=1 SV=2	4.16667	4	ND	2.32558	3.49742	1.01826	1.80629
10	P61978	205	HNRPK_HUMAN Heterogeneous nuclear ribonucleoprotein K OS=Homo sapiens OX=9606 GN=HNRNPK PE=1 SV=1	ND	3.0303	3.57143	3.84615	3.48263	0.415111	1.80018
11	P22626	50	ROA2_HUMAN Heterogeneous nuclear ribonucleoproteins A2/B1 OS=Homo sapiens OX=9606 GN=HNRNPA2B1 PE=1 SV=2	ND	ND	3.44828	ND	3.44828		1.78588
12	Q52LJ0	295	FA98B_HUMAN Protein FAM98B OS=Homo sapiens OX=9606 GN=FAM98B PE=1 SV=1	3.84615	3.21733	3.32384	3.20513	3.39811	0.303413	1.76473
13	Q7L2J0	153	MEPCE_HUMAN 7SK snRNA methylphosphate capping enzyme OS=Homo sapiens OX=9606 GN=MEPCE PE=1 SV=1	4	2.08289	3.96825	3.3199	3.34276	0.896474	1.74104
14	P07910	46	HNRPC_HUMAN Heterogeneous nuclear ribonucleoproteins C1/C2 OS=Homo sapiens OX=9606 GN=HNRNPC PE=1 SV=4	ND	ND	ND	3.33333	3.33333		1.73696
15	Q6DCA0	18	AMERL_HUMAN AMMECR1-like protein OS=Homo sapiens OX=9606 GN=AMMECR1L PE=1 SV=1	ND	ND	3.125	ND	3.125		1.64386
16	P00352	133	AL1A1_HUMAN Retinal dehydrogenase 1 OS=Homo sapiens OX=9606 GN=ALDH1A1 PE=1 SV=2	2.85714	2.94118	2.94613	2.94118	2.92141	0.0429085	1.54666
17	P14618	49	KPYM_HUMAN Pyruvate kinase PKM OS=Homo sapiens OX=9606 GN=PKM PE=1 SV=4	3.33333	2.80151	2.33796	2.67267	2.78637	0.41368	1.47839
18	P09936	220	UCHL1_HUMAN Ubiquitin carboxyl-terminal hydrolase isozyme L1 OS=Homo sapiens OX=9606 GN=UCHL1 PE=1 SV=2	ND	2.59784	ND	ND	2.59784		1.37731	Site	Note=Susceptible to oxidation;Ontology_term=ECO:0000269;evidence=ECO:0000269|PubMed:14722078;Dbxref=PMID:14722078
19	Q8N573	410	OXR1_HUMAN Oxidation resistance protein 1 OS=Homo sapiens OX=9606 GN=OXR1 PE=1 SV=2	ND	ND	2.5641	ND	2.5641		1.35845
20	P28331	75	NDUS1_HUMAN NADH-ubiquinone oxidoreductase 75 kDa subunit, mitochondrial OS=Homo sapiens OX=9606 GN=NDUFS1 PE=1 SV=3	ND	2.38095	2.70468	ND	2.54282	0.228912	1.34643	Metal binding	Note=Iron-sulfur 1 (2Fe-2S);Ontology_term=ECO:0000250;evidence=ECO:0000250
21	P04406	247	G3P_HUMAN Glyceraldehyde-3-phosphate dehydrogenase OS=Homo sapiens OX=9606 GN=GAPDH PE=1 SV=3	2.50534	2.15285	2.5641	2.55456	2.44421	0.195941	1.28937	Modified residue&Modified residue&Mutagenesis	Note=S-(2-succinyl)cysteine;Ontology_term=ECO:0000250;evidence=ECO:0000250|UniProtKB:P04797$Note=S-nitrosocysteine;Ontology_term=ECO:0000269,ECO:0000269;evidence=ECO:0000269|PubMed:22771119,ECO:0000269|PubMed:25417112;Dbxref=PMID:22771119,PMID:25417112$Note=Markedly reduced glycolytic activity%3B when associated with S-152 and S-156. Forms free radical-induced aggregates%2C but to a lesser extent…
22	P09382	61	LEG1_HUMAN Galectin-1 OS=Homo sapiens OX=9606 GN=LGALS1 PE=1 SV=2	ND	2.43902	ND	ND	2.43902		1.2863
23	Q17RN3	301	FA98C_HUMAN Protein FAM98C OS=Homo sapiens OX=9606 GN=FAM98C PE=2 SV=1	ND	ND	2.08333	2.7027	2.39302	0.437961	1.25883
24	Q6GMV2	194	SMYD5_HUMAN SET and MYND domain-containing protein 5 OS=Homo sapiens OX=9606 GN=SMYD5 PE=1 SV=2	ND	2	2.63158	ND	2.31579	0.446595	1.2115
25	O94916	580	NFAT5_HUMAN Nuclear factor of activated T-cells 5 OS=Homo sapiens OX=9606 GN=NFAT5 PE=1 SV=1	ND	2.27273	2.38095	2.27273	2.3088	0.0624808	1.20715
26	Q15020	670	SART3_HUMAN Squamous cell carcinoma antigen recognized by T-cells 3 OS=Homo sapiens OX=9606 GN=SART3 PE=1 SV=1	ND	ND	2.27273	ND	2.27273		1.18443
27	Q9UPN7	455	PP6R1_HUMAN Serine/threonine-protein phosphatase 6 regulatory subunit 1 OS=Homo sapiens OX=9606 GN=PPP6R1 PE=1 SV=5	ND	ND	ND	2.27273	2.27273		1.18443
28	P49585	346	PCY1A_HUMAN Choline-phosphate cytidylyltransferase A OS=Homo sapiens OX=9606 GN=PCYT1A PE=1 SV=2	2.20583	2.31746	2.23485	2.27964	2.25944	0.04917	1.17597
29	Q9BSI4	332	TINF2_HUMAN TERF1-interacting nuclear factor 2 OS=Homo sapiens OX=9606 GN=TINF2 PE=1 SV=1	ND	2.43902	2.17391	2.08333	2.23209	0.184844	1.15839
30	Q6NTF9	8	RHBD2_HUMAN Rhomboid domain-containing protein 2 OS=Homo sapiens OX=9606 GN=RHBDD2 PE=2 SV=2	ND	ND	ND	2.22222	2.22222		1.152
31	O95232	58	LC7L3_HUMAN Luc7-like protein 3 OS=Homo sapiens OX=9606 GN=LUC7L3 PE=1 SV=2	ND	ND	2.17391	ND	2.17391		1.12029
32	O75874	379	IDHC_HUMAN Isocitrate dehydrogenase [NADP] cytoplasmic OS=Homo sapiens OX=9606 GN=IDH1 PE=1 SV=2	2.08333	ND	ND	ND	2.08333		1.05889
33	Q9UGI8	397	TES_HUMAN Testin OS=Homo sapiens OX=9606 GN=TES PE=1 SV=1	ND	2.08333	ND	ND	2.08333		1.05889
34	P62244	72	RS15A_HUMAN 40S ribosomal protein S15a OS=Homo sapiens OX=9606 GN=RPS15A PE=1 SV=2	2.10736	2.08333	ND	2.04082	2.07717	0.033695	1.05462
35	H0YCT1	64	H0YCT1_HUMAN Nuclear pore complex protein Nup98-Nup96 (Fragment) OS=Homo sapiens OX=9606 GN=NUP98 PE=1 SV=1	ND	ND	2.04082	ND	2.04082		1.02915
36	Q17RN3	302	FA98C_HUMAN Protein FAM98C OS=Homo sapiens OX=9606 GN=FAM98C PE=2 SV=1	ND	2.63158	1.44928	ND	2.04043	0.836012	1.02887
37	P62241	182	RS8_HUMAN 40S ribosomal protein S8 OS=Homo sapiens OX=9606 GN=RPS8 PE=1 SV=2	1.92308	2	1.85315	2.04082	1.95426	0.083227	0.966624
38	P62316	46	SMD2_HUMAN Small nuclear ribonucleoprotein Sm D2 OS=Homo sapiens OX=9606 GN=SNRPD2 PE=1 SV=1	ND	1.81818	2.04082	ND	1.9295	0.15743	0.948227
39	P12235	160	ADT1_HUMAN ADP/ATP translocase 1 OS=Homo sapiens OX=9606 GN=SLC25A4 PE=1 SV=4	ND	2.08333	1.81818	1.88679	1.92943	0.137623	0.948177	Modified residue	Note=S-nitrosocysteine;Ontology_term=ECO:0000250;evidence=ECO:0000250|UniProtKB:Q05962
40	Q16254	88	E2F4_HUMAN Transcription factor E2F4 OS=Homo sapiens OX=9606 GN=E2F4 PE=1 SV=2	ND	ND	1.92308	ND	1.92308		0.943419
41	P07195	164	LDHB_HUMAN L-lactate dehydrogenase B chain OS=Homo sapiens OX=9606 GN=LDHB PE=1 SV=2	ND	1.69591	1.72465	2.32558	1.91538	0.355534	0.937631
42	P23396	134	RS3_HUMAN 40S ribosomal protein S3 OS=Homo sapiens OX=9606 GN=RPS3 PE=1 SV=2	ND	1.72414	2.1055	ND	1.91482	0.269662	0.937209
43	P63220	56	RS21_HUMAN 40S ribosomal protein S21 OS=Homo sapiens OX=9606 GN=RPS21 PE=1 SV=1	ND	1.81818	2	ND	1.90909	0.128566	0.932885
44	P62937	62	PPIA_HUMAN Peptidyl-prolyl cis-trans isomerase A OS=Homo sapiens OX=9606 GN=PPIA PE=1 SV=2	ND	2.81746	0.98039	ND	1.89892	1.299	0.925183
45	P31949	13	S10AB_HUMAN Protein S100-A11 OS=Homo sapiens OX=9606 GN=S100A11 PE=1 SV=2	ND	1.88679	1.88679	ND	1.88679	0	0.915934	Disulfide bond	Note=Interchain;Ontology_term=ECO:0000269;evidence=ECO:0000269|PubMed:18618420;Dbxref=PMID:18618420
46	P39023	114	RL3_HUMAN 60S ribosomal protein L3 OS=Homo sapiens OX=9606 GN=RPL3 PE=1 SV=2	ND	2	ND	1.75439	1.87719	0.173672	0.908579
47	Q6IQ49	415	SDE2_HUMAN Replication stress response regulator SDE2 OS=Homo sapiens OX=9606 GN=SDE2 PE=1 SV=1	ND	ND	2.04082	1.66667	1.85374	0.264564	0.890443
48	A0A0C4ZLW1	853	A0A0C4ZLW1_HUMAN CDK5RAP2 protein OS=Homo sapiens OX=9606 GN=CDK5RAP2 PE=2 SV=1	ND	1.85185	ND	ND	1.85185		0.888967
49	A8K8D9	158	A8K8D9_HUMAN Glucose-6-phosphate 1-dehydrogenase OS=Homo sapiens OX=9606 PE=2 SV=1	ND	ND	ND	1.85185	1.85185		0.888967
50	B4DZY9	30	B4DZY9_HUMAN cDNA FLJ59103, highly similar to T-complex protein 1 subunit epsilon OS=Homo sapiens OX=9606 PE=2 SV=1	ND	ND	1.85185	ND	1.85185		0.888967
51	Q15050	52	RRS1_HUMAN Ribosome biogenesis regulatory protein homolog OS=Homo sapiens OX=9606 GN=RRS1 PE=1 SV=2	ND	1.51515	2.17391	ND	1.84453	0.465814	0.883253
52	Q04828	206	AK1C1_HUMAN Aldo-keto reductase family 1 member C1 OS=Homo sapiens OX=9606 GN=AKR1C1 PE=1 SV=1	1.85185	1.81818	ND	1.85185	1.84063	0.0194394	0.880197
53	Q02241	933	KIF23_HUMAN Kinesin-like protein KIF23 OS=Homo sapiens OX=9606 GN=KIF23 PE=1 SV=3	ND	1.81818	1.85185	ND	1.83501	0.0238083	0.875792
54	P17516	206	AK1C4_HUMAN Aldo-keto reductase family 1 member C4 OS=Homo sapiens OX=9606 GN=AKR1C4 PE=1 SV=3	ND	ND	1.81818	ND	1.81818		0.862495
55	P06733	337	ENOA_HUMAN Alpha-enolase OS=Homo sapiens OX=9606 GN=ENO1 PE=1 SV=2	ND	ND	1.78571	ND	1.78571		0.836498
56	Q8WWZ3	132	EDAD_HUMAN Ectodysplasin-A receptor-associated adapter protein OS=Homo sapiens OX=9606 GN=EDARADD PE=1 SV=3	ND	ND	1.75439	ND	1.75439		0.810969
57	P08238	564	HS90B_HUMAN Heat shock protein HSP 90-beta OS=Homo sapiens OX=9606 GN=HSP90AB1 PE=1 SV=4	ND	ND	1.88679	1.5625	1.72464	0.229308	0.786299
58	Q86VY4	85	TSYL5_HUMAN Testis-specific Y-encoded-like protein 5 OS=Homo sapiens OX=9606 GN=TSPYL5 PE=1 SV=2	ND	ND	1.72414	ND	1.72414		0.785877
59	Q9NU19	144	TB22B_HUMAN TBC1 domain family member 22B OS=Homo sapiens OX=9606 GN=TBC1D22B PE=1 SV=3	ND	1.72414	ND	ND	1.72414		0.785877
60	Q9ULT8	936	HECD1_HUMAN E3 ubiquitin-protein ligase HECTD1 OS=Homo sapiens OX=9606 GN=HECTD1 PE=1 SV=3	ND	ND	1.72414	ND	1.72414		0.785877
61	P46782	66	RS5_HUMAN 40S ribosomal protein S5 OS=Homo sapiens OX=9606 GN=RPS5 PE=1 SV=4	2.27273	0.91359	2.38095	1.27053	1.70945	0.728981	0.773532
62	P60174	255	TPIS_HUMAN Triosephosphate isomerase OS=Homo sapiens OX=9606 GN=TPI1 PE=1 SV=3	ND	1.6129	1.92308	1.5873	1.70776	0.186911	0.772105
63	Q969V6	326	MKL1_HUMAN MKL/myocardin-like protein 1 OS=Homo sapiens OX=9606 GN=MKL1 PE=1 SV=1	ND	1.69492	ND	ND	1.69492		0.761217	Site	Note=Breakpoint for translocation to form RBM15-MRTFA;Ontology_term=ECO:0000269;evidence=ECO:0000269|PubMed:11431691;Dbxref=PMID:11431691
64	P04406	156	G3P_HUMAN Glyceraldehyde-3-phosphate dehydrogenase OS=Homo sapiens OX=9606 GN=GAPDH PE=1 SV=3	1.78571	1.78571	1.85185	1.27747	1.67518	0.26697	0.74432	Mutagenesis	Note=Markedly reduced glycolytic activity%3B when associated with S-152 and S-247. Forms free radical-induced aggregates%2C but to a lesser extent than wild-type protein%3B when associated with S-156 and S-247. C->S;Ontology_term=ECO:0000269;evidence=ECO:0000269|PubMed:25086035;Dbxref=PMID:25086035
65	O60218	45	AK1BA_HUMAN Aldo-keto reductase family 1 member B10 OS=Homo sapiens OX=9606 GN=AKR1B10 PE=1 SV=2	ND	1.92308	1.66667	1.36986	1.6532	0.276856	0.725264
66	O60506	96	HNRPQ_HUMAN Heterogeneous nuclear ribonucleoprotein Q OS=Homo sapiens OX=9606 GN=SYNCRIP PE=1 SV=2	ND	ND	1.63934	ND	1.63934		0.713115
67	P11413	158	G6PD_HUMAN Glucose-6-phosphate 1-dehydrogenase OS=Homo sapiens OX=9606 GN=G6PD PE=1 SV=4	1.63934	ND	ND	ND	1.63934		0.713115
68	P60953	157	CDC42_HUMAN Cell division control protein 42 homolog OS=Homo sapiens OX=9606 GN=CDC42 PE=1 SV=2	ND	ND	1.63934	ND	1.63934		0.713115
69	Q01433	107	AMPD2_HUMAN AMP deaminase 2 OS=Homo sapiens OX=9606 GN=AMPD2 PE=1 SV=2	1.45403	1.88679	1.68391	1.52972	1.63861	0.191113	0.712475
70	Q16822	306	PCKGM_HUMAN Phosphoenolpyruvate carboxykinase [GTP], mitochondrial OS=Homo sapiens OX=9606 GN=PCK2 PE=1 SV=4	ND	1.72414	ND	1.53846	1.6313	0.131296	0.706022	Active site	Ontology_term=ECO:0000250;evidence=ECO:0000250|UniProtKB:P07379
71	Q9H9G7	283	AGO3_HUMAN Protein argonaute-3 OS=Homo sapiens OX=9606 GN=AGO3 PE=1 SV=2	1.69492	ND	ND	1.5625	1.62871	0.0936351	0.70373
72	P50914	42	RL14_HUMAN 60S ribosomal protein L14 OS=Homo sapiens OX=9606 GN=RPL14 PE=1 SV=4	1.6129	1.51515	1.92308	1.44928	1.6251	0.209716	0.700531
73	P22314	632	UBA1_HUMAN Ubiquitin-like modifier-activating enzyme 1 OS=Homo sapiens OX=9606 GN=UBA1 PE=1 SV=3	1.17647	1.6001	1.81936	1.88679	1.62068	0.320434	0.696599	Active site	Note=Glycyl thioester intermediate;Ontology_term=ECO:0000255;evidence=ECO:0000255|PROSITE-ProRule:PRU10132
74	P07900	572	HS90A_HUMAN Heat shock protein HSP 90-alpha OS=Homo sapiens OX=9606 GN=HSP90AA1 PE=1 SV=5	1.6129	ND	ND	ND	1.6129		0.689657
75	P60763	157	RAC3_HUMAN Ras-related C3 botulinum toxin substrate 3 OS=Homo sapiens OX=9606 GN=RAC3 PE=1 SV=1	ND	1.36986	1.85185	ND	1.61085	0.340818	0.687827
76	Q9HC52	142	CBX8_HUMAN Chromobox protein homolog 8 OS=Homo sapiens OX=9606 GN=CBX8 PE=1 SV=3	ND	ND	1.85185	1.36986	1.61085	0.340818	0.687827
77	O14867	184	BACH1_HUMAN Transcription regulator protein BACH1 OS=Homo sapiens OX=9606 GN=BACH1 PE=1 SV=2	ND	ND	1.5873	ND	1.5873		0.666575
78	Q96D53	147	COQ8B_HUMAN Atypical kinase COQ8B, mitochondrial OS=Homo sapiens OX=9606 GN=COQ8B PE=1 SV=2	ND	1.63934	1.51515	ND	1.57725	0.0878156	0.657407
79	Q13541	62	4EBP1_HUMAN Eukaryotic translation initiation factor 4E-binding protein 1 OS=Homo sapiens OX=9606 GN=EIF4EBP1 PE=1 SV=3	1.6129	1.53846	1.53846	1.5625	1.56308	0.0350935	0.644392
80	Q13569	233	TDG_HUMAN G/T mismatch-specific thymine DNA glycosylase OS=Homo sapiens OX=9606 GN=TDG PE=1 SV=2	1.5625	ND	ND	ND	1.5625		0.643856
81	O15042	65	SR140_HUMAN U2 snRNP-associated SURP motif-containing protein OS=Homo sapiens OX=9606 GN=U2SURP PE=1 SV=2	3.23525	1.09462	1.0287	0.8854	1.56099	1.11958	0.642464
82	Q9NVG8	36	TBC13_HUMAN TBC1 domain family member 13 OS=Homo sapiens OX=9606 GN=TBC1D13 PE=1 SV=3	1.29871	1.68052	1.5873	1.65134	1.55447	0.174894	0.63642
83	P15880	188	RS2_HUMAN 40S ribosomal protein S2 OS=Homo sapiens OX=9606 GN=RPS2 PE=1 SV=2	1.53846	1.20686	1.72414	1.72414	1.5484	0.243938	0.630778
84	P10809	442	CH60_HUMAN 60 kDa heat shock protein, mitochondrial OS=Homo sapiens OX=9606 GN=HSPD1 PE=1 SV=2	1.75439	1.33333	ND	ND	1.54386	0.297734	0.626542
85	E9PCX8	90	E9PCX8_HUMAN Tensin-3 (Fragment) OS=Homo sapiens OX=9606 GN=TNS3 PE=1 SV=8	ND	1.53846	ND	ND	1.53846		0.621487
86	Q9NZZ3	20	CHMP5_HUMAN Charged multivesicular body protein 5 OS=Homo sapiens OX=9606 GN=CHMP5 PE=1 SV=1	ND	ND	ND	1.53846	1.53846		0.621487
87	Q8NF64	600	ZMIZ2_HUMAN Zinc finger MIZ domain-containing protein 2 OS=Homo sapiens OX=9606 GN=ZMIZ2 PE=1 SV=2	ND	1.66667	1.38889	ND	1.52778	0.19642	0.611437
88	P00352	370	AL1A1_HUMAN Retinal dehydrogenase 1 OS=Homo sapiens OX=9606 GN=ALDH1A1 PE=1 SV=2	1.66667	1.68966	1.08696	1.6129	1.51405	0.286536	0.59841
89	P09211	48	GSTP1_HUMAN Glutathione S-transferase P OS=Homo sapiens OX=9606 GN=GSTP1 PE=1 SV=2	ND	ND	1.5873	1.40845	1.49788	0.126466	0.582917
90	Q6QNY0	168	BL1S3_HUMAN Biogenesis of lysosome-related organelles complex 1 subunit 3 OS=Homo sapiens OX=9606 GN=BLOC1S3 PE=1 SV=1	1.75439	1.78571	0.9434	ND	1.4945	0.477523	0.579663
91	Q6I9Y2	90	THOC7_HUMAN THO complex subunit 7 homolog OS=Homo sapiens OX=9606 GN=THOC7 PE=1 SV=3	ND	1.49254	ND	ND	1.49254		0.57777
92	P35754	23	GLRX1_HUMAN Glutaredoxin-1 OS=Homo sapiens OX=9606 GN=GLRX PE=1 SV=2	1.5042	1.3827	1.59452	1.47073	1.48804	0.0875505	0.573411	Disulfide bond	Note=Redox-active
93	Q9Y3D2	169	MSRB2_HUMAN Methionine-R-sulfoxide reductase B2, mitochondrial OS=Homo sapiens OX=9606 GN=MSRB2 PE=1 SV=2	ND	ND	1.42857	1.53846	1.48351	0.077704	0.56902	Active site	Note=Nucleophile;Ontology_term=ECO:0000255;evidence=ECO:0000255|PROSITE-ProRule:PRU01126
94	Q02040	563	AK17A_HUMAN A-kinase anchor protein 17A OS=Homo sapiens OX=9606 GN=AKAP17A PE=1 SV=2	ND	1.0989	ND	1.85185	1.47538	0.532416	0.561082
95	Q9BTE7	31	DCNL5_HUMAN DCN1-like protein 5 OS=Homo sapiens OX=9606 GN=DCUN1D5 PE=1 SV=1	ND	ND	1.47059	ND	1.47059		0.556395
96	P11387	630	TOP1_HUMAN DNA topoisomerase 1 OS=Homo sapiens OX=9606 GN=TOP1 PE=1 SV=2	1.38889	1.37432	1.42857	1.67853	1.46758	0.142491	0.553437
97	P09936	152	UCHL1_HUMAN Ubiquitin carboxyl-terminal hydrolase isozyme L1 OS=Homo sapiens OX=9606 GN=UCHL1 PE=1 SV=2	1.48501	1.5949	1.51902	1.26052	1.46486	0.143764	0.550765
98	P07237	343	PDIA1_HUMAN Protein disulfide-isomerase OS=Homo sapiens OX=9606 GN=P4HB PE=1 SV=3	ND	ND	2.13675	0.7874	1.46208	0.954135	0.548017
99	Q96Q06	1260	PLIN4_HUMAN Perilipin-4 OS=Homo sapiens OX=9606 GN=PLIN4 PE=1 SV=2	1.44928	1.44928	1.44258	1.46542	1.45164	0.00971444	0.537684
100	O94762	434	RECQ5_HUMAN ATP-dependent DNA helicase Q5 OS=Homo sapiens OX=9606 GN=RECQL5 PE=1 SV=2	ND	1.44928	ND	ND	1.44928		0.535336
101	P62306	66	RUXF_HUMAN Small nuclear ribonucleoprotein F OS=Homo sapiens OX=9606 GN=SNRPF PE=1 SV=1	1.44928	ND	ND	ND	1.44928		0.535336
102	Q14203	636	DCTN1_HUMAN Dynactin subunit 1 OS=Homo sapiens OX=9606 GN=DCTN1 PE=1 SV=3	ND	ND	1.44928	ND	1.44928		0.535336
103	Q9BT40	173	INP5K_HUMAN Inositol polyphosphate 5-phosphatase K OS=Homo sapiens OX=9606 GN=INPP5K PE=1 SV=3	ND	ND	1.44928	ND	1.44928		0.535336
104	P02795	48	MT2_HUMAN Metallothionein-2 OS=Homo sapiens OX=9606 GN=MT2A PE=1 SV=1	ND	1.88679	1.0101	ND	1.44844	0.619913	0.534505	Metal binding	Note=Divalent metal cation%3B cluster A
105	Q96EB1	218	ELP4_HUMAN Elongator complex protein 4 OS=Homo sapiens OX=9606 GN=ELP4 PE=1 SV=2	1.38889	1.42857	1.47059	1.49254	1.44515	0.0459459	0.531217
106	P21333	2378	FLNA_HUMAN Filamin-A OS=Homo sapiens OX=9606 GN=FLNA PE=1 SV=4	ND	1.47059	1.31579	1.53846	1.44161	0.114128	0.527684
107	Q6PJG2	16	EMSA1_HUMAN ELM2 and SANT domain-containing protein 1 OS=Homo sapiens OX=9606 GN=ELMSAN1 PE=1 SV=2	ND	1.26582	ND	1.6129	1.43936	0.245423	0.525427
108	Q5VUA4	1559	ZN318_HUMAN Zinc finger protein 318 OS=Homo sapiens OX=9606 GN=ZNF318 PE=1 SV=2	ND	1.40845	1.42857	1.47059	1.43587	0.0317067	0.521925
109	O00159	802	MYO1C_HUMAN Unconventional myosin-Ic OS=Homo sapiens OX=9606 GN=MYO1C PE=1 SV=4	ND	1.85185	ND	1.01628	1.43406	0.590837	0.52011
110	P49902	181	5NTC_HUMAN Cytosolic purine 5'-nucleotidase OS=Homo sapiens OX=9606 GN=NT5C2 PE=1 SV=1	1.35135	1.44928	1.36109	1.5625	1.43105	0.0980781	0.517079
111	B4DVQ0	230	B4DVQ0_HUMAN cDNA FLJ58286, highly similar to Actin, cytoplasmic 2 OS=Homo sapiens OX=9606 PE=2 SV=1	ND	ND	ND	1.42857	1.42857		0.514572
112	Q86YV5	390	PRAG1_HUMAN Inactive tyrosine-protein kinase PRAG1 OS=Homo sapiens OX=9606 GN=PRAG1 PE=1 SV=4	ND	ND	ND	1.42857	1.42857		0.514572
113	Q8IXK0	673	PHC2_HUMAN Polyhomeotic-like protein 2 OS=Homo sapiens OX=9606 GN=PHC2 PE=1 SV=1	1.42857	ND	ND	ND	1.42857		0.514572
114	P57723	113	PCBP4_HUMAN Poly(rC)-binding protein 4 OS=Homo sapiens OX=9606 GN=PCBP4 PE=2 SV=1	ND	1.5625	ND	1.26582	1.41416	0.209784	0.499945
115	Q6NXT1	265	ANR54_HUMAN Ankyrin repeat domain-containing protein 54 OS=Homo sapiens OX=9606 GN=ANKRD54 PE=1 SV=2	1.44928	1.20482	1.35135	1.63934	1.4112	0.182275	0.49692
116	Q8NGB0	872	Q8NGB0_HUMAN Seven transmembrane helix receptor OS=Homo sapiens OX=9606 PE=3 SV=1	1.38889	1.42857	ND	1.40845	1.40864	0.0198407	0.4943
117	O00154	36	BACH_HUMAN Cytosolic acyl coenzyme A thioester hydrolase OS=Homo sapiens OX=9606 GN=ACOT7 PE=1 SV=3	ND	ND	1.40845	ND	1.40845		0.494108
118	P25398	92	RS12_HUMAN 40S ribosomal protein S12 OS=Homo sapiens OX=9606 GN=RPS12 PE=1 SV=3	ND	1.40845	1.40845	ND	1.40845	0	0.494108
119	Q5T1V6	414	DDX59_HUMAN Probable ATP-dependent RNA helicase DDX59 OS=Homo sapiens OX=9606 GN=DDX59 PE=1 SV=1	ND	1.40845	ND	ND	1.40845		0.494108
120	Q16719	327	KYNU_HUMAN Kynureninase OS=Homo sapiens OX=9606 GN=KYNU PE=1 SV=1	1.44928	0.97846	1.78571	ND	1.40448	0.405485	0.49004
121	Q8TB03	12	CX038_HUMAN Uncharacterized protein CXorf38 OS=Homo sapiens OX=9606 GN=CXorf38 PE=1 SV=1	2.08333	1.16279	1.1236	1.23457	1.40107	0.457153	0.486532
122	Q86W50	253	MET16_HUMAN U6 small nuclear RNA (adenine-(43)-N(6))-methyltransferase OS=Homo sapiens OX=9606 GN=METTL16 PE=1 SV=2	1.40713	1.40434	1.47753	1.29012	1.39478	0.0775568	0.480038
123	P27708	1296	PYR1_HUMAN CAD protein OS=Homo sapiens OX=9606 GN=CAD PE=1 SV=3	ND	1.42857	1.51515	1.23457	1.39276	0.143676	0.47795
124	P10599	32	THIO_HUMAN Thioredoxin OS=Homo sapiens OX=9606 GN=TXN PE=1 SV=3	1.33426	1.4683	1.34786	1.40559	1.389	0.0612446	0.474049	Active site&Disulfide bond&Mutagenesis	Note=Nucleophile;Ontology_term=ECO:0000269;evidence=ECO:0000269|PubMed:9108029;Dbxref=PMID:9108029$Note=Redox-active;Ontology_term=ECO:0000255,ECO:0000269,ECO:0000269;evidence=ECO:0000255|PROSITE-ProRule:PRU00691,ECO:0000269|PubMed:17260951,ECO:0000269|PubMed:2001356;Dbxref=PMID:17260951,PMID:2001356$Note=Loses its reducing activity%2C interaction with APEX1 and transcription activation%3B when a…
125	P21580	54	TNAP3_HUMAN Tumor necrosis factor alpha-induced protein 3 OS=Homo sapiens OX=9606 GN=TNFAIP3 PE=1 SV=1	1.38889	ND	ND	ND	1.38889		0.473932
126	P49790	1129	NU153_HUMAN Nuclear pore complex protein Nup153 OS=Homo sapiens OX=9606 GN=NUP153 PE=1 SV=2	ND	ND	ND	1.38889	1.38889		0.473932
127	Q14192	254	FHL2_HUMAN Four and a half LIM domains protein 2 OS=Homo sapiens OX=9606 GN=FHL2 PE=1 SV=3	ND	ND	ND	1.38889	1.38889		0.473932
128	Q9H410	65	DSN1_HUMAN Kinetochore-associated protein DSN1 homolog OS=Homo sapiens OX=9606 GN=DSN1 PE=1 SV=2	ND	ND	1.38889	ND	1.38889		0.473932
129	Q9Y696	35	CLIC4_HUMAN Chloride intracellular channel protein 4 OS=Homo sapiens OX=9606 GN=CLIC4 PE=1 SV=4	1.2692	1.35201	1.30962	1.62167	1.38813	0.159325	0.473137
130	Q9BQS8	1062	FYCO1_HUMAN FYVE and coiled-coil domain-containing protein 1 OS=Homo sapiens OX=9606 GN=FYCO1 PE=1 SV=3	ND	ND	1.63934	1.13636	1.38785	0.355661	0.472852
131	D7GNM9	65	D7GNM9_HUMAN MHC class II antigen (Fragment) OS=Homo sapiens OX=9606 GN=HLA-DRB9 PE=4 SV=1	ND	1.38889	1.36986	ND	1.37938	0.0134562	0.464015
132	O00231	289	PSD11_HUMAN 26S proteasome non-ATPase regulatory subunit 11 OS=Homo sapiens OX=9606 GN=PSMD11 PE=1 SV=3	1.36986	ND	1.47059	1.29315	1.37787	0.0889906	0.462436
133	O43823	173	AKAP8_HUMAN A-kinase anchor protein 8 OS=Homo sapiens OX=9606 GN=AKAP8 PE=1 SV=1	ND	1.42857	1.31579	ND	1.37218	0.0797475	0.45647
134	P40818	575	UBP8_HUMAN Ubiquitin carboxyl-terminal hydrolase 8 OS=Homo sapiens OX=9606 GN=USP8 PE=1 SV=1	ND	1.49254	1.28389	1.33333	1.36992	0.109031	0.454092
135	Q05209	495	PTN12_HUMAN Tyrosine-protein phosphatase non-receptor type 12 OS=Homo sapiens OX=9606 GN=PTPN12 PE=1 SV=3	1.36986	ND	ND	ND	1.36986		0.454028
136	Q16760	596	DGKD_HUMAN Diacylglycerol kinase delta OS=Homo sapiens OX=9606 GN=DGKD PE=1 SV=4	ND	ND	ND	1.36986	1.36986		0.454028
137	Q8TC07	24	TBC15_HUMAN TBC1 domain family member 15 OS=Homo sapiens OX=9606 GN=TBC1D15 PE=1 SV=2	ND	1.36986	ND	ND	1.36986		0.454028
138	Q96T51	107	RUFY1_HUMAN RUN and FYVE domain-containing protein 1 OS=Homo sapiens OX=9606 GN=RUFY1 PE=1 SV=2	ND	ND	1.36986	ND	1.36986		0.454028
139	Q9NQX3	663	GEPH_HUMAN Gephyrin OS=Homo sapiens OX=9606 GN=GPHN PE=1 SV=1	ND	ND	ND	1.36986	1.36986		0.454028
140	Q9NUW8	48	TYDP1_HUMAN Tyrosyl-DNA phosphodiesterase 1 OS=Homo sapiens OX=9606 GN=TDP1 PE=1 SV=2	ND	ND	ND	1.36986	1.36986		0.454028
141	Q53H82	90	LACB2_HUMAN Endoribonuclease LACTB2 OS=Homo sapiens OX=9606 GN=LACTB2 PE=1 SV=2	ND	1.6129	1.47059	1.02041	1.36797	0.309289	0.452033
142	O43795	129	MYO1B_HUMAN Unconventional myosin-Ib OS=Homo sapiens OX=9606 GN=MYO1B PE=1 SV=3	0.76336	1.39867	1.7871	1.51515	1.36607	0.433518	0.450031
143	P46937	343	YAP1_HUMAN Transcriptional coactivator YAP1 OS=Homo sapiens OX=9606 GN=YAP1 PE=1 SV=2	1.40845	1.31579	ND	ND	1.36212	0.0655205	0.445854
144	Q5VWZ2	12	LYPL1_HUMAN Lysophospholipase-like protein 1 OS=Homo sapiens OX=9606 GN=LYPLAL1 PE=1 SV=3	ND	1.39867	1.33333	1.35135	1.36112	0.0337471	0.444791
145	Q13049	61	TRI32_HUMAN E3 ubiquitin-protein ligase TRIM32 OS=Homo sapiens OX=9606 GN=TRIM32 PE=1 SV=2	1.49138	1.34849	1.41709	1.16323	1.35505	0.140562	0.438343
146	O15357	1121	SHIP2_HUMAN Phosphatidylinositol 3,4,5-trisphosphate 5-phosphatase 2 OS=Homo sapiens OX=9606 GN=INPPL1 PE=1 SV=2	ND	1.35135	ND	ND	1.35135		0.434401
147	Q12789	320	TF3C1_HUMAN General transcription factor 3C polypeptide 1 OS=Homo sapiens OX=9606 GN=GTF3C1 PE=1 SV=4	ND	ND	ND	1.35135	1.35135		0.434401
148	P09936	90	UCHL1_HUMAN Ubiquitin carboxyl-terminal hydrolase isozyme L1 OS=Homo sapiens OX=9606 GN=UCHL1 PE=1 SV=2	1.35135	1.06383	1.49254	1.49254	1.35007	0.202098	0.433029	Active site&Mutagenesis	Note=Nucleophile;Ontology_term=ECO:0000269;evidence=ECO:0000269|PubMed:20439756;Dbxref=PMID:20439756$Note=Abolishes enzymatic activity. C->S;Ontology_term=ECO:0000269,ECO:0000269,ECO:0000269,ECO:0000269;evidence=ECO:0000269|PubMed:12705903,ECO:0000269|PubMed:20439756,ECO:0000269|PubMed:23359680,ECO:0000269|PubMed:8639624;Dbxref=PMID:12705903,PMID:20439756,PMID:23359680,PMID:8639624
149	P84103	6	SRSF3_HUMAN Serine/arginine-rich splicing factor 3 OS=Homo sapiens OX=9606 GN=SRSF3 PE=1 SV=1	1.37342	1.28147	1.38942	1.3531	1.34935	0.0476331	0.432267
150	O43896	975	KIF1C_HUMAN Kinesin-like protein KIF1C OS=Homo sapiens OX=9606 GN=KIF1C PE=1 SV=3	ND	1.63934	ND	1.05263	1.34598	0.414867	0.428662
151	O43149	1069	ZZEF1_HUMAN Zinc finger ZZ-type and EF-hand domain-containing protein 1 OS=Homo sapiens OX=9606 GN=ZZEF1 PE=1 SV=6	ND	1.35135	1.47059	1.20482	1.34225	0.133118	0.424657
152	Q8NBX0	238	SCPDL_HUMAN Saccharopine dehydrogenase-like oxidoreductase OS=Homo sapiens OX=9606 GN=SCCPDH PE=1 SV=1	ND	1.47059	1.20482	ND	1.33771	0.187928	0.41976
153	P00352	186	AL1A1_HUMAN Retinal dehydrogenase 1 OS=Homo sapiens OX=9606 GN=ALDH1A1 PE=1 SV=2	ND	1.49254	1.2987	1.21951	1.33692	0.14047	0.41891
154	Q96LD4	454	TRI47_HUMAN Tripartite motif-containing protein 47 OS=Homo sapiens OX=9606 GN=TRIM47 PE=1 SV=2	ND	1.53846	1.13479	ND	1.33662	0.285438	0.418595
155	Q15019	111	SEPT2_HUMAN Septin-2 OS=Homo sapiens OX=9606 GN=SEPT2 PE=1 SV=1	ND	0.90319	2.26908	0.83083	1.33437	0.810294	0.416155
156	B4DPV7	81	B4DPV7_HUMAN cDNA FLJ54534, highly similar to Homo sapiens cysteinyl-tRNA synthetase (CARS), transcript variant 3, mRNA OS=Homo sapiens OX=9606 PE=2 SV=1	ND	ND	1.35135	1.31726	1.33431	0.0241053	0.416088
157	P49790	1065	NU153_HUMAN Nuclear pore complex protein Nup153 OS=Homo sapiens OX=9606 GN=NUP153 PE=1 SV=2	ND	ND	ND	1.33333	1.33333		0.415034
158	P78527	1312	PRKDC_HUMAN DNA-dependent protein kinase catalytic subunit OS=Homo sapiens OX=9606 GN=PRKDC PE=1 SV=3	1.33333	ND	ND	ND	1.33333		0.415034
159	Q15365	201	PCBP1_HUMAN Poly(rC)-binding protein 1 OS=Homo sapiens OX=9606 GN=PCBP1 PE=1 SV=2	ND	1.33333	ND	ND	1.33333		0.415034
160	Q9C0D5	800	TANC1_HUMAN Protein TANC1 OS=Homo sapiens OX=9606 GN=TANC1 PE=1 SV=3	ND	1.33333	ND	ND	1.33333		0.415034
161	Q8IYB3	33	SRRM1_HUMAN Serine/arginine repetitive matrix protein 1 OS=Homo sapiens OX=9606 GN=SRRM1 PE=1 SV=2	ND	1.40845	ND	1.25	1.32923	0.112041	0.410585
162	Q7L2E3	1183	DHX30_HUMAN Putative ATP-dependent RNA helicase DHX30 OS=Homo sapiens OX=9606 GN=DHX30 PE=1 SV=1	ND	1.44928	1.2987	1.23457	1.32752	0.110217	0.40873
163	Q15366	109	PCBP2_HUMAN Poly(rC)-binding protein 2 OS=Homo sapiens OX=9606 GN=PCBP2 PE=1 SV=1	ND	1.32596	ND	ND	1.32596		0.407037
164	Q14151	224	SAFB2_HUMAN Scaffold attachment factor B2 OS=Homo sapiens OX=9606 GN=SAFB2 PE=1 SV=1	1.20482	1.41097	1.2987	1.37399	1.32212	0.0910908	0.402853
165	Q9Y4W2	690	LAS1L_HUMAN Ribosomal biogenesis protein LAS1L OS=Homo sapiens OX=9606 GN=LAS1L PE=1 SV=2	1.40845	1.44928	1.25	1.17647	1.32105	0.129142	0.401685
166	P12525	343	MYCP1_HUMAN Putative myc-like protein MYCLP1 OS=Homo sapiens OX=9606 GN=MYCLP1 PE=5 SV=2	1.26582	1.2987	1.35135	1.35135	1.31681	0.0420871	0.397042
167	O43815	765	STRN_HUMAN Striatin OS=Homo sapiens OX=9606 GN=STRN PE=1 SV=4	ND	ND	ND	1.31579	1.31579		0.395929
168	P11802	78	CDK4_HUMAN Cyclin-dependent kinase 4 OS=Homo sapiens OX=9606 GN=CDK4 PE=1 SV=2	ND	1.31579	ND	ND	1.31579		0.395929
169	P22681	567	CBL_HUMAN E3 ubiquitin-protein ligase CBL OS=Homo sapiens OX=9606 GN=CBL PE=1 SV=2	ND	1.31579	ND	ND	1.31579		0.395929
170	Q14BN4	37	SLMAP_HUMAN Sarcolemmal membrane-associated protein OS=Homo sapiens OX=9606 GN=SLMAP PE=1 SV=1	ND	ND	1.31579	ND	1.31579		0.395929
171	Q68CP9	1271	ARID2_HUMAN AT-rich interactive domain-containing protein 2 OS=Homo sapiens OX=9606 GN=ARID2 PE=1 SV=2	ND	ND	1.31579	ND	1.31579		0.395929
172	Q9HBK9	334	AS3MT_HUMAN Arsenite methyltransferase OS=Homo sapiens OX=9606 GN=AS3MT PE=1 SV=3	ND	ND	1.31579	ND	1.31579		0.395929
173	A0A0A0MTC1	3057	A0A0A0MTC1_HUMAN E3 ubiquitin-protein ligase RNF213 OS=Homo sapiens OX=9606 GN=RNF213 PE=1 SV=1	ND	ND	ND	1.31448	1.31448		0.394492
174	O95081	39	AGFG2_HUMAN Arf-GAP domain and FG repeat-containing protein 2 OS=Homo sapiens OX=9606 GN=AGFG2 PE=1 SV=2	1.3396	1.51451	1.24816	1.1526	1.31372	0.154104	0.393655
175	P78527	25	PRKDC_HUMAN DNA-dependent protein kinase catalytic subunit OS=Homo sapiens OX=9606 GN=PRKDC PE=1 SV=3	ND	1.40196	1.33333	1.20482	1.31337	0.100074	0.393273
176	O75410	514	TACC1_HUMAN Transforming acidic coiled-coil-containing protein 1 OS=Homo sapiens OX=9606 GN=TACC1 PE=1 SV=2	1.31579	1.33518	1.25612	1.34059	1.31192	0.0386937	0.39168
177	Q96KC8	380	DNJC1_HUMAN DnaJ homolog subfamily C member 1 OS=Homo sapiens OX=9606 GN=DNAJC1 PE=1 SV=1	ND	1.36986	1.25	ND	1.30993	0.0847538	0.38949
178	A0A096LP59	237	A0A096LP59_HUMAN Transcriptional regulator ATRX (Fragment) OS=Homo sapiens OX=9606 GN=ATRX PE=1 SV=1	ND	1.26582	1.35135	ND	1.30858	0.0604788	0.388008
179	O14545	482	TRAD1_HUMAN TRAF-type zinc finger domain-containing protein 1 OS=Homo sapiens OX=9606 GN=TRAFD1 PE=1 SV=1	1.5625	1.35135	1.2987	1.02041	1.30824	0.223192	0.387627
180	Q709C8	2925	VP13C_HUMAN Vacuolar protein sorting-associated protein 13C OS=Homo sapiens OX=9606 GN=VPS13C PE=1 SV=1	ND	ND	1.2987	1.31579	1.30724	0.0120845	0.38653
181	P62913	150	RL11_HUMAN 60S ribosomal protein L11 OS=Homo sapiens OX=9606 GN=RPL11 PE=1 SV=2	1.28205	1.26582	1.33333	1.33333	1.30363	0.034926	0.382537
182	Q15047	53	SETB1_HUMAN Histone-lysine N-methyltransferase SETDB1 OS=Homo sapiens OX=9606 GN=SETDB1 PE=1 SV=1	ND	ND	0.87726	1.72414	1.3007	0.598835	0.379288
183	P14618	31	KPYM_HUMAN Pyruvate kinase PKM OS=Homo sapiens OX=9606 GN=PKM PE=1 SV=4	ND	ND	ND	1.2987	1.2987		0.377068
184	P55735	187	SEC13_HUMAN Protein SEC13 homolog OS=Homo sapiens OX=9606 GN=SEC13 PE=1 SV=3	ND	ND	1.2987	ND	1.2987		0.377068
185	Q13464	1281	ROCK1_HUMAN Rho-associated protein kinase 1 OS=Homo sapiens OX=9606 GN=ROCK1 PE=1 SV=1	ND	1.2987	ND	ND	1.2987		0.377068
186	Q96JM3	740	CHAP1_HUMAN Chromosome alignment-maintaining phosphoprotein 1 OS=Homo sapiens OX=9606 GN=CHAMP1 PE=1 SV=2	ND	1.2987	ND	ND	1.2987		0.377068
187	P57075	486	UBS3A_HUMAN Ubiquitin-associated and SH3 domain-containing protein A OS=Homo sapiens OX=9606 GN=UBASH3A PE=1 SV=1	ND	1.23457	1.35135	ND	1.29296	0.0825759	0.370678
188	P06733	399	ENOA_HUMAN Alpha-enolase OS=Homo sapiens OX=9606 GN=ENO1 PE=1 SV=2	1.31579	ND	1.21951	1.33333	1.28954	0.0612814	0.36686
189	Q12929	767	EPS8_HUMAN Epidermal growth factor receptor kinase substrate 8 OS=Homo sapiens OX=9606 GN=EPS8 PE=1 SV=1	ND	1.36986	ND	1.20482	1.28734	0.116701	0.364393
190	P52564	38	MP2K6_HUMAN Dual specificity mitogen-activated protein kinase kinase 6 OS=Homo sapiens OX=9606 GN=MAP2K6 PE=1 SV=1	ND	1.23349	1.42857	1.19048	1.28418	0.126881	0.360847
191	Q5H9F3	766	BCORL_HUMAN BCL-6 corepressor-like protein 1 OS=Homo sapiens OX=9606 GN=BCORL1 PE=1 SV=1	ND	1.25	1.28205	1.31579	1.28261	0.0328986	0.359086
192	O75420	583	GGYF1_HUMAN GRB10-interacting GYF protein 1 OS=Homo sapiens OX=9606 GN=GIGYF1 PE=1 SV=2	ND	ND	1.28205	ND	1.28205		0.358453
193	P30038	348	AL4A1_HUMAN Delta-1-pyrroline-5-carboxylate dehydrogenase, mitochondrial OS=Homo sapiens OX=9606 GN=ALDH4A1 PE=1 SV=3	ND	ND	ND	1.28205	1.28205		0.358453	Active site	Note=Nucleophile;Ontology_term=ECO:0000255,ECO:0000255,ECO:0000269;evidence=ECO:0000255|PROSITE-ProRule:PRU10007,ECO:0000255|PROSITE-ProRule:PRU10008,ECO:0000269|PubMed:22516612;Dbxref=PMID:22516612
194	P48506	501	GSH1_HUMAN Glutamate--cysteine ligase catalytic subunit OS=Homo sapiens OX=9606 GN=GCLC PE=1 SV=2	1.28205	ND	ND	ND	1.28205		0.358453
195	Q92538	613	GBF1_HUMAN Golgi-specific brefeldin A-resistance guanine nucleotide exchange factor 1 OS=Homo sapiens OX=9606 GN=GBF1 PE=1 SV=2	ND	ND	1.28205	ND	1.28205		0.358453
196	Q9UJ68	220	MSRA_HUMAN Mitochondrial peptide methionine sulfoxide reductase OS=Homo sapiens OX=9606 GN=MSRA PE=1 SV=1	ND	1.28205	ND	ND	1.28205		0.358453
197	Q9UL25	29	RAB21_HUMAN Ras-related protein Rab-21 OS=Homo sapiens OX=9606 GN=RAB21 PE=1 SV=3	ND	ND	1.28205	ND	1.28205		0.358453
198	Q9BW19	95	KIFC1_HUMAN Kinesin-like protein KIFC1 OS=Homo sapiens OX=9606 GN=KIFC1 PE=1 SV=2	ND	1.04167	1.40845	1.38889	1.27967	0.206346	0.355772
199	P17081	144	RHOQ_HUMAN Rho-related GTP-binding protein RhoQ OS=Homo sapiens OX=9606 GN=RHOQ PE=1 SV=2	ND	1.38889	0.93458	1.51515	1.27954	0.305342	0.355625
200	Q9H9P8	38	L2HDH_HUMAN L-2-hydroxyglutarate dehydrogenase, mitochondrial OS=Homo sapiens OX=9606 GN=L2HGDH PE=1 SV=3	1.14943	1.40845	ND	ND	1.27894	0.183155	0.354949
201	P17987	357	TCPA_HUMAN T-complex protein 1 subunit alpha OS=Homo sapiens OX=9606 GN=TCP1 PE=1 SV=1	ND	1.23457	1.2987	1.2987	1.27732	0.0370255	0.353124
202	Q9H3A2	9	Q9H3A2_HUMAN PRO2425 OS=Homo sapiens OX=9606 PE=2 SV=1	ND	ND	0.98039	1.5625	1.27144	0.411614	0.346469
203	P48643	181	TCPE_HUMAN T-complex protein 1 subunit epsilon OS=Homo sapiens OX=9606 GN=CCT5 PE=1 SV=1	1.49254	1.49254	1.20762	0.89286	1.27139	0.285871	0.346407
204	Q96EB6	502	SIR1_HUMAN NAD-dependent protein deacetylase sirtuin-1 OS=Homo sapiens OX=9606 GN=SIRT1 PE=1 SV=2	ND	1.28205	1.35135	1.17647	1.26996	0.088065	0.344779
205	Q96CM8	64	ACSF2_HUMAN Acyl-CoA synthetase family member 2, mitochondrial OS=Homo sapiens OX=9606 GN=ACSF2 PE=1 SV=2	1.36986	ND	1.08804	1.35135	1.26975	0.157637	0.344544
206	Q709C8	2588	VP13C_HUMAN Vacuolar protein sorting-associated protein 13C OS=Homo sapiens OX=9606 GN=VPS13C PE=1 SV=1	1.14943	1.38889	ND	ND	1.26916	0.169324	0.343874
207	Q9H0C8	301	ILKAP_HUMAN Integrin-linked kinase-associated serine/threonine phosphatase 2C OS=Homo sapiens OX=9606 GN=ILKAP PE=1 SV=1	ND	1.19048	1.31579	1.2987	1.26832	0.0679537	0.342923
208	Q96D53	479	COQ8B_HUMAN Atypical kinase COQ8B, mitochondrial OS=Homo sapiens OX=9606 GN=COQ8B PE=1 SV=2	ND	1.20004	ND	1.33357	1.2668	0.09442	0.341194
209	P50452	364	SPB8_HUMAN Serpin B8 OS=Homo sapiens OX=9606 GN=SERPINB8 PE=1 SV=2	ND	1.26582	ND	ND	1.26582		0.340072
210	Q01469	47	FABP5_HUMAN Fatty acid-binding protein 5 OS=Homo sapiens OX=9606 GN=FABP5 PE=1 SV=3	ND	1.26582	ND	ND	1.26582		0.340072
211	Q12789	317	TF3C1_HUMAN General transcription factor 3C polypeptide 1 OS=Homo sapiens OX=9606 GN=GTF3C1 PE=1 SV=4	ND	ND	1.26582	ND	1.26582		0.340072
212	Q86YV5	312	PRAG1_HUMAN Inactive tyrosine-protein kinase PRAG1 OS=Homo sapiens OX=9606 GN=PRAG1 PE=1 SV=4	ND	1.26582	ND	ND	1.26582		0.340072
213	Q8TCU4	2622	ALMS1_HUMAN Alstrom syndrome protein 1 OS=Homo sapiens OX=9606 GN=ALMS1 PE=1 SV=4	ND	ND	1.26582	ND	1.26582		0.340072
214	Q96PZ0	443	PUS7_HUMAN Pseudouridylate synthase 7 homolog OS=Homo sapiens OX=9606 GN=PUS7 PE=1 SV=2	ND	1.26582	ND	ND	1.26582		0.340072
215	Q9NZM1	1467	MYOF_HUMAN Myoferlin OS=Homo sapiens OX=9606 GN=MYOF PE=1 SV=1	1.26582	ND	ND	ND	1.26582		0.340072
216	Q5T4S7	2554	UBR4_HUMAN E3 ubiquitin-protein ligase UBR4 OS=Homo sapiens OX=9606 GN=UBR4 PE=1 SV=1	1.83502	1.17647	0.78125	ND	1.26425	0.53234	0.338278
217	B4DER9	64	B4DER9_HUMAN cDNA FLJ55317, highly similar to Homo sapiens casein kinase 1, alpha 1 (CSNK1A1), transcript variant 1, mRNA OS=Homo sapiens OX=9606 PE=2 SV=1	ND	ND	1.0989	1.42857	1.26374	0.233112	0.337694
218	Q9BSC4	16	NOL10_HUMAN Nucleolar protein 10 OS=Homo sapiens OX=9606 GN=NOL10 PE=1 SV=1	ND	1.13636	1.37771	1.2738	1.26262	0.121063	0.336424
219	Q9NUI1	22	DECR2_HUMAN Peroxisomal 2,4-dienoyl-CoA reductase OS=Homo sapiens OX=9606 GN=DECR2 PE=1 SV=1	ND	1.15132	1.33333	1.2987	1.26112	0.0966504	0.334702
220	Q8TB24	346	RIN3_HUMAN Ras and Rab interactor 3 OS=Homo sapiens OX=9606 GN=RIN3 PE=1 SV=4	ND	1.42916	1.08111	1.26582	1.2587	0.174134	0.331931
221	Q8TDM6	1207	DLG5_HUMAN Disks large homolog 5 OS=Homo sapiens OX=9606 GN=DLG5 PE=1 SV=4	ND	0.92593	ND	1.5873	1.25662	0.467659	0.329543
222	O76021	47	RL1D1_HUMAN Ribosomal L1 domain-containing protein 1 OS=Homo sapiens OX=9606 GN=RSL1D1 PE=1 SV=3	ND	1.12274	1.38889	ND	1.25582	0.188196	0.328624
223	B7Z4B7	39	B7Z4B7_HUMAN cDNA FLJ52561, highly similar to Four and a half LIM domains protein 1 OS=Homo sapiens OX=9606 PE=2 SV=1	ND	1.34013	1.17143	ND	1.25578	0.119289	0.328584
224	Q99829	53	CPNE1_HUMAN Copine-1 OS=Homo sapiens OX=9606 GN=CPNE1 PE=1 SV=1	1.31579	1.26582	1.21951	1.22115	1.25557	0.0455213	0.32834
225	Q96TA1	466	NIBL1_HUMAN Niban-like protein 1 OS=Homo sapiens OX=9606 GN=FAM129B PE=1 SV=3	1.31579	1.10497	1.34192	ND	1.25423	0.129919	0.326798
226	Q9BPX6	62	MICU1_HUMAN Calcium uptake protein 1, mitochondrial OS=Homo sapiens OX=9606 GN=MICU1 PE=1 SV=1	1.20482	1.23016	1.2987	1.28205	1.25393	0.043863	0.32646
227	P61962	256	DCAF7_HUMAN DDB1- and CUL4-associated factor 7 OS=Homo sapiens OX=9606 GN=DCAF7 PE=1 SV=1	ND	ND	1.31579	1.19048	1.25313	0.0886076	0.325542
228	Q59FJ0	123	Q59FJ0_HUMAN Proteasome subunit beta type (Fragment) OS=Homo sapiens OX=9606 PE=2 SV=1	ND	1.2987	ND	1.20482	1.25176	0.0663832	0.323958
229	Q16881	209	TRXR1_HUMAN Thioredoxin reductase 1, cytoplasmic OS=Homo sapiens OX=9606 GN=TXNRD1 PE=1 SV=3	1.31579	ND	1.33333	1.10508	1.2514	0.12702	0.323543	Disulfide bond	Note=Redox-active;Ontology_term=ECO:0000250;evidence=ECO:0000250
230	P38646	366	GRP75_HUMAN Stress-70 protein, mitochondrial OS=Homo sapiens OX=9606 GN=HSPA9 PE=1 SV=2	ND	ND	ND	1.25	1.25		0.321928
231	Q15527	93	SURF2_HUMAN Surfeit locus protein 2 OS=Homo sapiens OX=9606 GN=SURF2 PE=1 SV=3	ND	ND	ND	1.25	1.25		0.321928
232	Q7L3T8	32	SYPM_HUMAN Probable proline--tRNA ligase, mitochondrial OS=Homo sapiens OX=9606 GN=PARS2 PE=1 SV=1	ND	ND	1.25	ND	1.25		0.321928
233	Q86VP3	156	PACS2_HUMAN Phosphofurin acidic cluster sorting protein 2 OS=Homo sapiens OX=9606 GN=PACS2 PE=1 SV=3	1.25	ND	ND	ND	1.25		0.321928
234	Q8N5I9	13	CL045_HUMAN Uncharacterized protein C12orf45 OS=Homo sapiens OX=9606 GN=C12orf45 PE=1 SV=2	ND	1.25	ND	ND	1.25		0.321928
235	Q8NAN2	128	MIGA1_HUMAN Mitoguardin 1 OS=Homo sapiens OX=9606 GN=MIGA1 PE=1 SV=1	ND	ND	1.25	ND	1.25		0.321928
236	Q9Y490	1199	TLN1_HUMAN Talin-1 OS=Homo sapiens OX=9606 GN=TLN1 PE=1 SV=3	ND	ND	1.25	ND	1.25		0.321928
237	Q14847	20	LASP1_HUMAN LIM and SH3 domain protein 1 OS=Homo sapiens OX=9606 GN=LASP1 PE=1 SV=2	ND	ND	ND	1.2455	1.2455		0.316725
238	Q9BYG5	13	PAR6B_HUMAN Partitioning defective 6 homolog beta OS=Homo sapiens OX=9606 GN=PARD6B PE=1 SV=1	ND	1.53846	ND	0.95238	1.24542	0.414421	0.316632
239	Q16186	88	ADRM1_HUMAN Proteasomal ubiquitin receptor ADRM1 OS=Homo sapiens OX=9606 GN=ADRM1 PE=1 SV=2	ND	1.19048	1.20482	1.33333	1.24288	0.0786623	0.313683
240	Q99973	1468	TEP1_HUMAN Telomerase protein component 1 OS=Homo sapiens OX=9606 GN=TEP1 PE=1 SV=2	ND	1.33333	ND	1.14943	1.24138	0.130037	0.311945
241	Q9NVT9	69	ARMC1_HUMAN Armadillo repeat-containing protein 1 OS=Homo sapiens OX=9606 GN=ARMC1 PE=1 SV=1	1.36986	1.16279	ND	1.19048	1.24104	0.112414	0.311553
242	B4DLN6	340	B4DLN6_HUMAN cDNA FLJ59033, highly similar to Protein disulfide-isomerase (EC 5.3.4.1) OS=Homo sapiens OX=9606 PE=2 SV=1	1.25316	ND	ND	1.224	1.23858	0.0206192	0.308687
243	Q9BVA0	344	KTNB1_HUMAN Katanin p80 WD40 repeat-containing subunit B1 OS=Homo sapiens OX=9606 GN=KATNB1 PE=1 SV=1	1.42857	1.25	1.1236	1.14943	1.2379	0.138315	0.307895
244	Q8IZ21	505	PHAR4_HUMAN Phosphatase and actin regulator 4 OS=Homo sapiens OX=9606 GN=PHACTR4 PE=1 SV=1	1	1.68174	1.03093	ND	1.23756	0.384985	0.307495
245	O75691	312	UTP20_HUMAN Small subunit processome component 20 homolog OS=Homo sapiens OX=9606 GN=UTP20 PE=1 SV=3	ND	1.28205	1.19048	ND	1.23626	0.0647498	0.305988
246	Q14934	688	NFAC4_HUMAN Nuclear factor of activated T-cells, cytoplasmic 4 OS=Homo sapiens OX=9606 GN=NFATC4 PE=1 SV=2	1.38889	1.33333	0.9819	ND	1.23471	0.220692	0.304168
247	Q8NDI1	849	EHBP1_HUMAN EH domain-binding protein 1 OS=Homo sapiens OX=9606 GN=EHBP1 PE=1 SV=3	1.21951	1.16279	1.35135	1.20482	1.23462	0.0814489	0.304064
248	P31948	370	STIP1_HUMAN Stress-induced-phosphoprotein 1 OS=Homo sapiens OX=9606 GN=STIP1 PE=1 SV=1	ND	ND	1.23457	ND	1.23457		0.304009
249	P42704	113	LPPRC_HUMAN Leucine-rich PPR motif-containing protein, mitochondrial OS=Homo sapiens OX=9606 GN=LRPPRC PE=1 SV=3	ND	ND	1.23457	ND	1.23457		0.304009
250	Q03188	633	CENPC_HUMAN Centromere protein C OS=Homo sapiens OX=9606 GN=CENPC PE=1 SV=2	ND	ND	ND	1.23457	1.23457		0.304009
251	Q659A1	963	ICE2_HUMAN Little elongation complex subunit 2 OS=Homo sapiens OX=9606 GN=ICE2 PE=1 SV=2	ND	1.23457	ND	ND	1.23457		0.304009
252	Q96JP2	1438	MY15B_HUMAN Unconventional myosin-XVB OS=Homo sapiens OX=9606 GN=MYO15B PE=1 SV=3	ND	1.23457	ND	ND	1.23457		0.304009
253	P78417	32	GSTO1_HUMAN Glutathione S-transferase omega-1 OS=Homo sapiens OX=9606 GN=GSTO1 PE=1 SV=2	1.23537	1.2754	1.20287	1.21501	1.23216	0.0317911	0.301193	Active site&Mutagenesis	Note=Nucleophile;Ontology_term=ECO:0000269;evidence=ECO:0000269|PubMed:10783391;Dbxref=PMID:10783391$Note=Loss of activity. C->A;Ontology_term=ECO:0000269;evidence=ECO:0000269|PubMed:17226937;Dbxref=PMID:17226937
254	P38117	42	ETFB_HUMAN Electron transfer flavoprotein subunit beta OS=Homo sapiens OX=9606 GN=ETFB PE=1 SV=3	1.2987	ND	1.16279	ND	1.23074	0.0961029	0.299532
255	P45983	245	MK08_HUMAN Mitogen-activated protein kinase 8 OS=Homo sapiens OX=9606 GN=MAPK8 PE=1 SV=2	1.40845	ND	1.05263	ND	1.23054	0.251603	0.299292
256	P42330	242	AK1C3_HUMAN Aldo-keto reductase family 1 member C3 OS=Homo sapiens OX=9606 GN=AKR1C3 PE=1 SV=4	ND	1.19048	1.26582	ND	1.22815	0.0532734	0.296487
257	O75153	1196	CLU_HUMAN Clustered mitochondria protein homolog OS=Homo sapiens OX=9606 GN=CLUH PE=1 SV=2	ND	1.17358	1.28205	ND	1.22782	0.0766999	0.296093
258	Q9P0V9	22	SEP10_HUMAN Septin-10 OS=Homo sapiens OX=9606 GN=SEPT10 PE=1 SV=2	1.02041	1.49254	ND	1.16673	1.22656	0.241685	0.294618
259	Q8NBS9	350	TXND5_HUMAN Thioredoxin domain-containing protein 5 OS=Homo sapiens OX=9606 GN=TXNDC5 PE=1 SV=2	ND	1.23977	1.21295	ND	1.22636	0.0189646	0.294383	Disulfide bond	Note=Redox-active;Ontology_term=ECO:0000255;evidence=ECO:0000255|PROSITE-ProRule:PRU00691
260	Q96SK2	295	TM209_HUMAN Transmembrane protein 209 OS=Homo sapiens OX=9606 GN=TMEM209 PE=1 SV=2	1.30603	ND	1.14505	ND	1.22554	0.11383	0.293418
261	O76075	194	DFFB_HUMAN DNA fragmentation factor subunit beta OS=Homo sapiens OX=9606 GN=DFFB PE=1 SV=1	ND	1.2603	1.19048	ND	1.22539	0.0493702	0.293241
262	P35080	84	PROF2_HUMAN Profilin-2 OS=Homo sapiens OX=9606 GN=PFN2 PE=1 SV=3	ND	1.05263	1.40301	1.21951	1.22505	0.175256	0.292841
263	P12532	316	KCRU_HUMAN Creatine kinase U-type, mitochondrial OS=Homo sapiens OX=9606 GN=CKMT1A PE=1 SV=1	1.04047	1.40824	ND	ND	1.22436	0.260053	0.292022
264	P49759	200	CLK1_HUMAN Dual specificity protein kinase CLK1 OS=Homo sapiens OX=9606 GN=CLK1 PE=1 SV=2	1.26582	ND	ND	1.17647	1.22114	0.06318	0.288235
265	P35579	931	MYH9_HUMAN Myosin-9 OS=Homo sapiens OX=9606 GN=MYH9 PE=1 SV=4	1.21951	1.19048	1.20482	1.26582	1.22016	0.0326674	0.287067
266	Q8IWB1	228	IPRI_HUMAN Inositol 1,4,5-trisphosphate receptor-interacting protein OS=Homo sapiens OX=9606 GN=ITPRIP PE=1 SV=1	ND	ND	ND	1.21969	1.21969		0.286515
267	Q9Y613	373	FHOD1_HUMAN FH1/FH2 domain-containing protein 1 OS=Homo sapiens OX=9606 GN=FHOD1 PE=1 SV=3	1.16279	1.03942	1.22704	1.44928	1.21963	0.171756	0.286447
268	Q8N4X5	292	AF1L2_HUMAN Actin filament-associated protein 1-like 2 OS=Homo sapiens OX=9606 GN=AFAP1L2 PE=1 SV=1	ND	ND	ND	1.21951	1.21951		0.286302
269	P36578	96	RL4_HUMAN 60S ribosomal protein L4 OS=Homo sapiens OX=9606 GN=RPL4 PE=1 SV=5	1.05263	1.2662	1.25796	1.2987	1.21887	0.112215	0.285547
270	Q9Y4H2	616	IRS2_HUMAN Insulin receptor substrate 2 OS=Homo sapiens OX=9606 GN=IRS2 PE=1 SV=2	1.25	0.98039	1.40845	1.22222	1.21527	0.176769	0.281271
271	Q14999	1601	CUL7_HUMAN Cullin-7 OS=Homo sapiens OX=9606 GN=CUL7 PE=1 SV=2	1.23457	1.20921	1.20015	1.2097	1.21341	0.0147759	0.279064
272	E9PF16	64	E9PF16_HUMAN Acyl-CoA synthetase family member 2, mitochondrial OS=Homo sapiens OX=9606 GN=ACSF2 PE=1 SV=1	ND	1.21324	ND	ND	1.21324		0.278865
273	Q9BT40	213	INP5K_HUMAN Inositol polyphosphate 5-phosphatase K OS=Homo sapiens OX=9606 GN=INPP5K PE=1 SV=3	ND	1.25	ND	1.17647	1.21324	0.0519936	0.278859
274	P10599	73	THIO_HUMAN Thioredoxin OS=Homo sapiens OX=9606 GN=TXN PE=1 SV=3	1.22828	1.25101	1.23505	1.13677	1.21278	0.0515599	0.278315	Modified residue&Disulfide bond&Mutagenesis&Mutagenesis&Mutagenesis	Note=S-nitrosocysteine%3B alternate;Ontology_term=ECO:0000269,ECO:0000269;evidence=ECO:0000269|PubMed:16408020,ECO:0000269|PubMed:17606900;Dbxref=PMID:16408020,PMID:17606900$Note=Interchain%3B alternate;Ontology_term=ECO:0000269;evidence=ECO:0000269|PubMed:17260951;Dbxref=PMID:17260951$Note=Strongly reduced S-nitrosylation of CASP3. C->D;Ontology_term=ECO:0000269,ECO:0000269,ECO:0000269;evidence=…
275	Q15025	602	TNIP1_HUMAN TNFAIP3-interacting protein 1 OS=Homo sapiens OX=9606 GN=TNIP1 PE=1 SV=2	ND	1.23457	1.19048	ND	1.21252	0.0311763	0.278014
276	P17676	248	CEBPB_HUMAN CCAAT/enhancer-binding protein beta OS=Homo sapiens OX=9606 GN=CEBPB PE=1 SV=2	1.22736	1.31153	1.07647	1.21951	1.20872	0.0975087	0.273477
277	A0A140VJS6	91	A0A140VJS6_HUMAN Proteasome subunit beta type OS=Homo sapiens OX=9606 PE=2 SV=1	1.29253	ND	1.1236	ND	1.20806	0.119452	0.272698
278	Q5VZK9	1106	CARL1_HUMAN F-actin-uncapping protein LRRC16A OS=Homo sapiens OX=9606 GN=CARMIL1 PE=1 SV=1	ND	1.33607	1.2298	1.05556	1.20714	0.141621	0.271597
279	Q9H7Z7	110	PGES2_HUMAN Prostaglandin E synthase 2 OS=Homo sapiens OX=9606 GN=PTGES2 PE=1 SV=1	1.22704	1.15607	1.23457	1.21002	1.20693	0.0354244	0.271336	Mutagenesis	Note=Loss of function. C->S;Ontology_term=ECO:0000269;evidence=ECO:0000269|PubMed:12804604;Dbxref=PMID:12804604
280	H7C0N4	121	H7C0N4_HUMAN Splicing factor 1 (Fragment) OS=Homo sapiens OX=9606 GN=SF1 PE=1 SV=1	ND	1.06576	1.19993	1.35135	1.20568	0.142882	0.269847
281	P52272	114	HNRPM_HUMAN Heterogeneous nuclear ribonucleoprotein M OS=Homo sapiens OX=9606 GN=HNRNPM PE=1 SV=3	ND	1.21951	1.19048	ND	1.205	0.0205273	0.269027
282	Q3KRA9	212	ALKB6_HUMAN Alpha-ketoglutarate-dependent dioxygenase alkB homolog 6 OS=Homo sapiens OX=9606 GN=ALKBH6 PE=1 SV=2	ND	ND	1.49254	0.91743	1.20498	0.406664	0.269015
283	E7EV07	1032	E7EV07_HUMAN Rho guanine nucleotide exchange factor 4 OS=Homo sapiens OX=9606 GN=ARHGEF4 PE=1 SV=2	ND	ND	1.20482	ND	1.20482		0.268818
284	O60884	146	DNJA2_HUMAN DnaJ homolog subfamily A member 2 OS=Homo sapiens OX=9606 GN=DNAJA2 PE=1 SV=1	ND	ND	1.20482	ND	1.20482		0.268818	Metal binding	Note=Zinc 1;Ontology_term=ECO:0000250;evidence=ECO:0000250
285	P51957	326	NEK4_HUMAN Serine/threonine-protein kinase Nek4 OS=Homo sapiens OX=9606 GN=NEK4 PE=1 SV=2	ND	ND	ND	1.20482	1.20482		0.268818
286	P78368	54	KC1G2_HUMAN Casein kinase I isoform gamma-2 OS=Homo sapiens OX=9606 GN=CSNK1G2 PE=1 SV=1	ND	1.20482	ND	ND	1.20482		0.268818
287	P83731	6	RL24_HUMAN 60S ribosomal protein L24 OS=Homo sapiens OX=9606 GN=RPL24 PE=1 SV=1	1.20482	ND	ND	ND	1.20482		0.268818
288	Q06323	22	PSME1_HUMAN Proteasome activator complex subunit 1 OS=Homo sapiens OX=9606 GN=PSME1 PE=1 SV=1	ND	1.20482	ND	ND	1.20482		0.268818
289	Q86TN4	237	TRPT1_HUMAN tRNA 2'-phosphotransferase 1 OS=Homo sapiens OX=9606 GN=TRPT1 PE=1 SV=2	ND	ND	1.20482	ND	1.20482		0.268818
290	Q8IY26	55	PLPP6_HUMAN Phospholipid phosphatase 6 OS=Homo sapiens OX=9606 GN=PLPP6 PE=1 SV=3	ND	ND	ND	1.20482	1.20482		0.268818
291	Q13155	23	AIMP2_HUMAN Aminoacyl tRNA synthase complex-interacting multifunctional protein 2 OS=Homo sapiens OX=9606 GN=AIMP2 PE=1 SV=2	1.31579	1.21638	1.10044	1.1838	1.2041	0.0890373	0.267958
292	Q14573	420	ITPR3_HUMAN Inositol 1,4,5-trisphosphate receptor type 3 OS=Homo sapiens OX=9606 GN=ITPR3 PE=1 SV=2	1.0989	1.25	1.12811	1.33552	1.20313	0.109872	0.266796
293	Q13418	346	ILK_HUMAN Integrin-linked protein kinase OS=Homo sapiens OX=9606 GN=ILK PE=1 SV=2	ND	1.08137	1.33333	1.19048	1.20173	0.126356	0.265109
294	O00170	122	AIP_HUMAN AH receptor-interacting protein OS=Homo sapiens OX=9606 GN=AIP PE=1 SV=2	ND	ND	ND	1.20172	1.20172		0.265101
295	P50749	251	RASF2_HUMAN Ras association domain-containing protein 2 OS=Homo sapiens OX=9606 GN=RASSF2 PE=1 SV=1	ND	1.20568	1.25	1.14943	1.2017	0.0504028	0.265081
296	O75152	636	ZC11A_HUMAN Zinc finger CCCH domain-containing protein 11A OS=Homo sapiens OX=9606 GN=ZC3H11A PE=1 SV=3	1.16279	ND	1.17647	1.26582	1.20169	0.055955	0.265069
297	Q8IUQ4	71	SIAH1_HUMAN E3 ubiquitin-protein ligase SIAH1 OS=Homo sapiens OX=9606 GN=SIAH1 PE=1 SV=2	ND	1.31579	1.08696	ND	1.20138	0.161807	0.264687
298	Q9NYL9	231	TMOD3_HUMAN Tropomodulin-3 OS=Homo sapiens OX=9606 GN=TMOD3 PE=1 SV=1	1.19048	1.16279	1.24806	ND	1.20044	0.0434994	0.263567
299	Q9UBU6	38	FA8A1_HUMAN Protein FAM8A1 OS=Homo sapiens OX=9606 GN=FAM8A1 PE=1 SV=1	ND	1.29066	1.25459	1.04762	1.19762	0.131153	0.260174
300	Q9H3K6	31	BOLA2_HUMAN BolA-like protein 2 OS=Homo sapiens OX=9606 GN=BOLA2 PE=1 SV=1	1.21951	1.16279	1.19048	1.21217	1.19624	0.0254777	0.258504
301	Q8IWV8	1717	UBR2_HUMAN E3 ubiquitin-protein ligase UBR2 OS=Homo sapiens OX=9606 GN=UBR2 PE=1 SV=1	1.36986	0.80508	1.40845	ND	1.19446	0.337767	0.256363
302	Q14980	658	NUMA1_HUMAN Nuclear mitotic apparatus protein 1 OS=Homo sapiens OX=9606 GN=NUMA1 PE=1 SV=2	ND	1.19048	1.19799	ND	1.19423	0.00531037	0.256087
303	Q8WZA9	373	IRGQ_HUMAN Immunity-related GTPase family Q protein OS=Homo sapiens OX=9606 GN=IRGQ PE=1 SV=1	1.19048	1.20482	1.1838	1.19048	1.19239	0.0088617	0.253862
304	P17987	147	TCPA_HUMAN T-complex protein 1 subunit alpha OS=Homo sapiens OX=9606 GN=TCP1 PE=1 SV=1	ND	1.17191	1.31579	1.08696	1.19155	0.115673	0.252844
305	B2R960	34	B2R960_HUMAN cDNA, FLJ94230, highly similar to Homo sapiens thioredoxin-like 1 (TXNL1), mRNA OS=Homo sapiens OX=9606 PE=2 SV=1	1.1908	1.20974	1.28304	1.08201	1.1914	0.0830678	0.252655
306	Q12959	378	DLG1_HUMAN Disks large homolog 1 OS=Homo sapiens OX=9606 GN=DLG1 PE=1 SV=2	ND	1.16279	ND	1.21951	1.19115	0.0401071	0.252355
307	P10644	18	KAP0_HUMAN cAMP-dependent protein kinase type I-alpha regulatory subunit OS=Homo sapiens OX=9606 GN=PRKAR1A PE=1 SV=1	ND	ND	1.19048	ND	1.19048		0.251543	Disulfide bond	Note=Interchain (with C-39);Ontology_term=ECO:0000250;evidence=ECO:0000250
308	P78417	192	GSTO1_HUMAN Glutathione S-transferase omega-1 OS=Homo sapiens OX=9606 GN=GSTO1 PE=1 SV=2	ND	ND	1.19048	ND	1.19048		0.251543
309	Q14997	1227	PSME4_HUMAN Proteasome activator complex subunit 4 OS=Homo sapiens OX=9606 GN=PSME4 PE=1 SV=2	ND	ND	ND	1.19048	1.19048		0.251543
310	Q6ZRQ5	597	MMS22_HUMAN Protein MMS22-like OS=Homo sapiens OX=9606 GN=MMS22L PE=1 SV=3	ND	ND	1.19048	ND	1.19048		0.251543
311	Q7RTP8	617	Q7RTP8_HUMAN Kinesin light chain 1J OS=Homo sapiens OX=9606 GN=KNS2 PE=2 SV=1	ND	ND	ND	1.19048	1.19048		0.251543
312	Q8IX01	656	SUGP2_HUMAN SURP and G-patch domain-containing protein 2 OS=Homo sapiens OX=9606 GN=SUGP2 PE=1 SV=2	ND	1.19048	ND	ND	1.19048		0.251543
313	Q8TEQ6	793	GEMI5_HUMAN Gem-associated protein 5 OS=Homo sapiens OX=9606 GN=GEMIN5 PE=1 SV=3	ND	ND	ND	1.19048	1.19048		0.251543
314	Q9BRP1	100	PDD2L_HUMAN Programmed cell death protein 2-like OS=Homo sapiens OX=9606 GN=PDCD2L PE=1 SV=1	ND	1.19048	ND	ND	1.19048		0.251543
315	Q9GZT4	269	SRR_HUMAN Serine racemase OS=Homo sapiens OX=9606 GN=SRR PE=1 SV=1	ND	ND	1.19048	ND	1.19048		0.251543
316	Q9H6U6	479	BCAS3_HUMAN Breast carcinoma-amplified sequence 3 OS=Homo sapiens OX=9606 GN=BCAS3 PE=1 SV=3	ND	1.19048	ND	ND	1.19048		0.251543
317	Q9NXH8	21	TOR4A_HUMAN Torsin-4A OS=Homo sapiens OX=9606 GN=TOR4A PE=1 SV=2	ND	ND	1.19048	ND	1.19048		0.251543
318	Q92614	250	MY18A_HUMAN Unconventional myosin-XVIIIa OS=Homo sapiens OX=9606 GN=MYO18A PE=1 SV=3	ND	1.0989	1.28205	ND	1.19047	0.129507	0.251537
319	B4DPV7	110	B4DPV7_HUMAN cDNA FLJ54534, highly similar to Homo sapiens cysteinyl-tRNA synthetase (CARS), transcript variant 3, mRNA OS=Homo sapiens OX=9606 PE=2 SV=1	ND	1.15044	1.22655	1.19048	1.18916	0.0380723	0.249939
320	Q96JM3	119	CHAP1_HUMAN Chromosome alignment-maintaining phosphoprotein 1 OS=Homo sapiens OX=9606 GN=CHAMP1 PE=1 SV=2	ND	1.21951	1.17071	1.17647	1.1889	0.0266679	0.249623
321	O95210	168	STBD1_HUMAN Starch-binding domain-containing protein 1 OS=Homo sapiens OX=9606 GN=STBD1 PE=1 SV=1	ND	ND	0.59172	1.78571	1.18871	0.844278	0.249403
322	Q9NX02	592	NALP2_HUMAN NACHT, LRR and PYD domains-containing protein 2 OS=Homo sapiens OX=9606 GN=NLRP2 PE=1 SV=1	ND	1.25	1.1236	ND	1.1868	0.0893783	0.247077
323	Q6ZV73	463	FGD6_HUMAN FYVE, RhoGEF and PH domain-containing protein 6 OS=Homo sapiens OX=9606 GN=FGD6 PE=1 SV=2	0.97234	1.11111	1.53846	1.12416	1.18652	0.244479	0.246733
324	P62857	27	RS28_HUMAN 40S ribosomal protein S28 OS=Homo sapiens OX=9606 GN=RPS28 PE=1 SV=1	1.16279	ND	1.14046	1.25624	1.1865	0.0614228	0.246708
325	Q86W50	432	MET16_HUMAN U6 small nuclear RNA (adenine-(43)-N(6))-methyltransferase OS=Homo sapiens OX=9606 GN=METTL16 PE=1 SV=2	1.13636	1.23457	1.20482	1.16963	1.18634	0.0426023	0.246524
326	P53004	204	BIEA_HUMAN Biliverdin reductase A OS=Homo sapiens OX=9606 GN=BLVRA PE=1 SV=2	1.19048	1.20482	1.25	1.0989	1.18605	0.0633947	0.246165
327	Q16851	123	UGPA_HUMAN UTP--glucose-1-phosphate uridylyltransferase OS=Homo sapiens OX=9606 GN=UGP2 PE=1 SV=5	1.11581	1.25119	1.18236	1.19107	1.18511	0.055414	0.245018	Mutagenesis	Note=No significant loss of activity. C->S;Ontology_term=ECO:0000269;evidence=ECO:0000269|PubMed:8612650;Dbxref=PMID:8612650
328	Q8NC51	11	PAIRB_HUMAN Plasminogen activator inhibitor 1 RNA-binding protein OS=Homo sapiens OX=9606 GN=SERBP1 PE=1 SV=2	1.23457	1.06383	1.23457	1.20482	1.18445	0.0816255	0.244214
329	Q07955	16	SRSF1_HUMAN Serine/arginine-rich splicing factor 1 OS=Homo sapiens OX=9606 GN=SRSF1 PE=1 SV=2	ND	1.31579	1.05263	ND	1.18421	0.186082	0.243925
330	P57721	141	PCBP3_HUMAN Poly(rC)-binding protein 3 OS=Homo sapiens OX=9606 GN=PCBP3 PE=2 SV=2	ND	ND	ND	1.18326	1.18326		0.242767
331	P27635	195	RL10_HUMAN 60S ribosomal protein L10 OS=Homo sapiens OX=9606 GN=RPL10 PE=1 SV=4	ND	1.13636	1.17647	1.23457	1.18247	0.0493789	0.2418
332	Q96HS1	168	PGAM5_HUMAN Serine/threonine-protein phosphatase PGAM5, mitochondrial OS=Homo sapiens OX=9606 GN=PGAM5 PE=1 SV=2	1.20942	1.11125	1.23208	1.17647	1.1823	0.0525853	0.241602
333	Q9UKV3	546	ACINU_HUMAN Apoptotic chromatin condensation inducer in the nucleus OS=Homo sapiens OX=9606 GN=ACIN1 PE=1 SV=2	1.2987	1.11111	1.13636	ND	1.18206	0.101802	0.241299
334	A0A024R275	6	A0A024R275_HUMAN Riboflavin kinase, isoform CRA_a OS=Homo sapiens OX=9606 GN=RFK PE=1 SV=1	1.14289	ND	ND	1.21951	1.1812	0.0541785	0.240253
335	O00291	249	HIP1_HUMAN Huntingtin-interacting protein 1 OS=Homo sapiens OX=9606 GN=HIP1 PE=1 SV=5	1.31579	1.06383	1.16279	ND	1.1808	0.126942	0.239769
336	Q5TFE4	119	NT5D1_HUMAN 5'-nucleotidase domain-containing protein 1 OS=Homo sapiens OX=9606 GN=NT5DC1 PE=1 SV=1	1.1715	1.19713	1.23051	1.11763	1.17919	0.0476248	0.237799
337	Q9Y4H2	801	IRS2_HUMAN Insulin receptor substrate 2 OS=Homo sapiens OX=9606 GN=IRS2 PE=1 SV=2	1.16735	1.19048	ND	ND	1.17891	0.0163554	0.23746
338	Q9Y383	348	LC7L2_HUMAN Putative RNA-binding protein Luc7-like 2 OS=Homo sapiens OX=9606 GN=LUC7L2 PE=1 SV=2	1.17305	1.20517	1.18114	1.14943	1.1772	0.0229945	0.235356
339	Q8TBC4	237	UBA3_HUMAN NEDD8-activating enzyme E1 catalytic subunit OS=Homo sapiens OX=9606 GN=UBA3 PE=1 SV=2	ND	1.28205	1.19526	1.05263	1.17665	0.115837	0.234681	Active site&Mutagenesis	Note=Glycyl thioester intermediate$Note=Abolishes thioester intermediate formation. C->S;Ontology_term=ECO:0000269;evidence=ECO:0000269|PubMed:10207026;Dbxref=PMID:10207026
340	Q02952	1139	AKA12_HUMAN A-kinase anchor protein 12 OS=Homo sapiens OX=9606 GN=AKAP12 PE=1 SV=4	1.19048	ND	1.16279	ND	1.17664	0.0195798	0.234667
341	A0A2P9AD74	8	A0A2P9AD74_HUMAN Madelate racemase/muconate lactonising family protein OS=Homo sapiens OX=9606 GN=BQ8482_111028 PE=4 SV=1	1.17647	ND	ND	ND	1.17647		0.234465
342	P51858	12	HDGF_HUMAN Hepatoma-derived growth factor OS=Homo sapiens OX=9606 GN=HDGF PE=1 SV=1	1.17647	ND	ND	ND	1.17647		0.234465	Disulfide bond	Ontology_term=ECO:0000250;evidence=ECO:0000250|UniProtKB:P51859
343	P60866	70	RS20_HUMAN 40S ribosomal protein S20 OS=Homo sapiens OX=9606 GN=RPS20 PE=1 SV=1	ND	ND	1.17647	ND	1.17647		0.234465
344	P68543	51	UBX2A_HUMAN UBX domain-containing protein 2A OS=Homo sapiens OX=9606 GN=UBXN2A PE=1 SV=1	ND	1.17647	ND	ND	1.17647		0.234465
345	Q16719	45	KYNU_HUMAN Kynureninase OS=Homo sapiens OX=9606 GN=KYNU PE=1 SV=1	ND	ND	1.17647	ND	1.17647		0.234465
346	Q8TDX7	298	NEK7_HUMAN Serine/threonine-protein kinase Nek7 OS=Homo sapiens OX=9606 GN=NEK7 PE=1 SV=1	ND	ND	1.17647	ND	1.17647		0.234465
347	Q96BH1	360	RNF25_HUMAN E3 ubiquitin-protein ligase RNF25 OS=Homo sapiens OX=9606 GN=RNF25 PE=1 SV=1	ND	1.17647	ND	ND	1.17647		0.234465
348	Q9NP92	33	RT30_HUMAN 39S ribosomal protein S30, mitochondrial OS=Homo sapiens OX=9606 GN=MRPS30 PE=1 SV=2	ND	ND	ND	1.17647	1.17647		0.234465
349	P23528	147	COF1_HUMAN Cofilin-1 OS=Homo sapiens OX=9606 GN=CFL1 PE=1 SV=3	1.13973	1.13974	1.21252	1.20811	1.17502	0.0407891	0.232691
350	P13639	41	EF2_HUMAN Elongation factor 2 OS=Homo sapiens OX=9606 GN=EEF2 PE=1 SV=4	1.14727	1.0618	1.2927	1.19691	1.17467	0.0964643	0.232256
351	O00443	13	P3C2A_HUMAN Phosphatidylinositol 4-phosphate 3-kinase C2 domain-containing subunit alpha OS=Homo sapiens OX=9606 GN=PIK3C2A PE=1 SV=2	ND	1.19048	1.11111	1.21951	1.1737	0.0561143	0.231064
352	O15228	668	GNPAT_HUMAN Dihydroxyacetone phosphate acyltransferase OS=Homo sapiens OX=9606 GN=GNPAT PE=1 SV=1	ND	1.19048	1.21951	1.11111	1.1737	0.0561143	0.231064
353	O75376	994	NCOR1_HUMAN Nuclear receptor corepressor 1 OS=Homo sapiens OX=9606 GN=NCOR1 PE=1 SV=2	ND	1.2006	1.0989	1.21951	1.173	0.0648681	0.230207
354	Q8WYP3	138	RIN2_HUMAN Ras and Rab interactor 2 OS=Homo sapiens OX=9606 GN=RIN2 PE=1 SV=1	1.11111	1.23457	ND	ND	1.17284	0.0872994	0.230006
355	Q9GZR7	15	DDX24_HUMAN ATP-dependent RNA helicase DDX24 OS=Homo sapiens OX=9606 GN=DDX24 PE=1 SV=1	1.20004	1.16279	1.13636	1.19048	1.17242	0.0287639	0.229486
356	P20810	413	ICAL_HUMAN Calpastatin OS=Homo sapiens OX=9606 GN=CAST PE=1 SV=4	1.17679	1.20544	1.17542	1.12797	1.17141	0.0320941	0.22824
357	B7Z8H1	50	B7Z8H1_HUMAN cDNA FLJ54814 OS=Homo sapiens OX=9606 PE=2 SV=1	ND	1.20482	1.13636	ND	1.17059	0.0484085	0.227236
358	Q5T5P2	1317	SKT_HUMAN Sickle tail protein homolog OS=Homo sapiens OX=9606 GN=KIAA1217 PE=1 SV=2	ND	1.14943	1.19048	ND	1.16995	0.0290267	0.226453
359	Q96FX7	209	TRM61_HUMAN tRNA (adenine(58)-N(1))-methyltransferase catalytic subunit TRMT61A OS=Homo sapiens OX=9606 GN=TRMT61A PE=1 SV=1	1.1236	ND	1.19304	1.19048	1.16904	0.039373	0.225324
360	Q712K3	191	UB2R2_HUMAN Ubiquitin-conjugating enzyme E2 R2 OS=Homo sapiens OX=9606 GN=UBE2R2 PE=1 SV=1	ND	1.10999	1.20482	1.19048	1.16843	0.0511159	0.224571
361	P18283	55	GPX2_HUMAN Glutathione peroxidase 2 OS=Homo sapiens OX=9606 GN=GPX2 PE=1 SV=3	ND	1.28205	1.05263	ND	1.16734	0.162224	0.223225
362	O15344	580	TRI18_HUMAN E3 ubiquitin-protein ligase Midline-1 OS=Homo sapiens OX=9606 GN=MID1 PE=1 SV=1	ND	1.21951	1.11486	ND	1.16718	0.0739987	0.223033
363	B4DTD4	2	B4DTD4_HUMAN cDNA FLJ56361, highly similar to Pinin OS=Homo sapiens OX=9606 PE=2 SV=1	1.16959	1.17251	1.15783	1.16856	1.16712	0.00641692	0.222956
364	Q92562	839	FIG4_HUMAN Polyphosphoinositide phosphatase OS=Homo sapiens OX=9606 GN=FIG4 PE=1 SV=1	ND	1.03093	1.43892	1.03093	1.16693	0.235553	0.222714
365	Q8WV41	188	SNX33_HUMAN Sorting nexin-33 OS=Homo sapiens OX=9606 GN=SNX33 PE=1 SV=1	1.44928	1.25	1.1236	0.83333	1.16405	0.258041	0.219156
366	Q9P2Y5	239	UVRAG_HUMAN UV radiation resistance-associated gene protein OS=Homo sapiens OX=9606 GN=UVRAG PE=1 SV=1	1.0989	1.31579	1.07527	ND	1.16332	0.13257	0.218248
367	Q6ZV73	449	FGD6_HUMAN FYVE, RhoGEF and PH domain-containing protein 6 OS=Homo sapiens OX=9606 GN=FGD6 PE=1 SV=2	ND	1.14943	1.17647	ND	1.16295	0.0191202	0.217789
368	B2RDE8	12	B2RDE8_HUMAN cDNA, FLJ96580, highly similar to Homo sapiens hepatoma-derived growth factor (high-mobility group protein 1-like) (HDGF), mRNA OS=Homo sapiens OX=9606 PE=2 SV=1	ND	1.14943	1.16279	1.17647	1.1629	0.0135203	0.217723
369	P49585	37	PCY1A_HUMAN Choline-phosphate cytidylyltransferase A OS=Homo sapiens OX=9606 GN=PCYT1A PE=1 SV=2	1.17647	1.16279	1.16279	1.14943	1.16287	0.0110394	0.21769	Mutagenesis	Note=Abolishes formation of the interchain disulfide that can be observed when the enzyme is treated with copper phenanthrolene (in vitro). C->S;Ontology_term=ECO:0000269;evidence=ECO:0000269|PubMed:15069071;Dbxref=PMID:15069071
370	O15525	68	MAFG_HUMAN Transcription factor MafG OS=Homo sapiens OX=9606 GN=MAFG PE=1 SV=1	ND	ND	1.16279	ND	1.16279		0.217591
371	P00352	50	AL1A1_HUMAN Retinal dehydrogenase 1 OS=Homo sapiens OX=9606 GN=ALDH1A1 PE=1 SV=2	ND	ND	ND	1.16279	1.16279		0.217591
372	P17027	347	ZNF23_HUMAN Zinc finger protein 23 OS=Homo sapiens OX=9606 GN=ZNF23 PE=1 SV=3	ND	ND	ND	1.16279	1.16279		0.217591
373	Q12933	170	TRAF2_HUMAN TNF receptor-associated factor 2 OS=Homo sapiens OX=9606 GN=TRAF2 PE=1 SV=2	ND	ND	1.16279	ND	1.16279		0.217591
374	Q16514	143	TAF12_HUMAN Transcription initiation factor TFIID subunit 12 OS=Homo sapiens OX=9606 GN=TAF12 PE=1 SV=1	ND	ND	1.16279	ND	1.16279		0.217591
375	Q9BZ67	191	FRMD8_HUMAN FERM domain-containing protein 8 OS=Homo sapiens OX=9606 GN=FRMD8 PE=1 SV=1	ND	1.16279	ND	ND	1.16279		0.217591
376	Q9UL40	68	ZN346_HUMAN Zinc finger protein 346 OS=Homo sapiens OX=9606 GN=ZNF346 PE=1 SV=1	1	1.32432	ND	ND	1.16216	0.229329	0.216809
377	P13716	223	HEM2_HUMAN Delta-aminolevulinic acid dehydratase OS=Homo sapiens OX=9606 GN=ALAD PE=1 SV=1	1.20482	1.26832	0.97945	1.19268	1.16132	0.1257	0.215762	Metal binding&Mutagenesis	Note=Zinc 2$Note=No effect on catalytic activity%3B when associated with A-131. C->A;Ontology_term=ECO:0000269;evidence=ECO:0000269|PubMed:11032836;Dbxref=PMID:11032836
378	Q9Y296	195	TPPC4_HUMAN Trafficking protein particle complex subunit 4 OS=Homo sapiens OX=9606 GN=TRAPPC4 PE=1 SV=1	ND	ND	1.08696	1.23457	1.16077	0.104376	0.215076
379	Q8WUP2	323	FBLI1_HUMAN Filamin-binding LIM protein 1 OS=Homo sapiens OX=9606 GN=FBLIM1 PE=1 SV=2	1.11111	ND	1.1037	1.26582	1.16021	0.091536	0.214386
380	Q9UGP4	305	LIMD1_HUMAN LIM domain-containing protein 1 OS=Homo sapiens OX=9606 GN=LIMD1 PE=1 SV=1	1.12388	1.1287	1.14943	1.23457	1.15914	0.0514905	0.213061
381	Q5TAX3	204	TUT4_HUMAN Terminal uridylyltransferase 4 OS=Homo sapiens OX=9606 GN=TUT4 PE=1 SV=3	ND	1.20482	1.21951	1.05263	1.15899	0.0924	0.212864
382	Q96PZ0	38	PUS7_HUMAN Pseudouridylate synthase 7 homolog OS=Homo sapiens OX=9606 GN=PUS7 PE=1 SV=2	1.13636	1.14943	1.19048	1.15611	1.15809	0.0230956	0.211754
383	Q9Y4H2	613	IRS2_HUMAN Insulin receptor substrate 2 OS=Homo sapiens OX=9606 GN=IRS2 PE=1 SV=2	ND	0.94508	1.36986	ND	1.15747	0.300365	0.210975
384	Q15149	1122	PLEC_HUMAN Plectin OS=Homo sapiens OX=9606 GN=PLEC PE=1 SV=3	ND	1.14943	1.16279	ND	1.15611	0.00944695	0.209279
385	P11498	622	PYC_HUMAN Pyruvate carboxylase, mitochondrial OS=Homo sapiens OX=9606 GN=PC PE=1 SV=2	1.23457	1.07577	ND	ND	1.15517	0.112289	0.208105
386	Q9GZY8	209	MFF_HUMAN Mitochondrial fission factor OS=Homo sapiens OX=9606 GN=MFF PE=1 SV=1	1.14943	1.08696	0.9434	1.43911	1.15473	0.208289	0.207549
387	P19013	17	K2C4_HUMAN Keratin, type II cytoskeletal 4 OS=Homo sapiens OX=9606 GN=KRT4 PE=1 SV=4	ND	1.1024	1.20683	ND	1.15462	0.0738432	0.207412
388	P04075	339	ALDOA_HUMAN Fructose-bisphosphate aldolase A OS=Homo sapiens OX=9606 GN=ALDOA PE=1 SV=2	ND	ND	1.26582	1.04167	1.15375	0.158498	0.206324
389	P62753	12	RS6_HUMAN 40S ribosomal protein S6 OS=Homo sapiens OX=9606 GN=RPS6 PE=1 SV=1	0.91743	1.21411	1.0101	1.47059	1.15306	0.245297	0.205464
390	O00299	24	CLIC1_HUMAN Chloride intracellular channel protein 1 OS=Homo sapiens OX=9606 GN=CLIC1 PE=1 SV=4	1.16753	1.12933	1.16372	1.14429	1.15122	0.0177901	0.20316	Modified residue&Disulfide bond&Mutagenesis	Note=S-glutathionyl cysteine%3B alternate;Ontology_term=ECO:0000269;evidence=ECO:0000269|PubMed:14613939;Dbxref=PMID:14613939$Note=Alternate;Ontology_term=ECO:0000269;evidence=ECO:0000269|PubMed:14613939;Dbxref=PMID:14613939$Note=Loss of dimerization and of ion transport activity. C->S;Ontology_term=ECO:0000269;evidence=ECO:0000269|PubMed:14613939;Dbxref=PMID:14613939
391	Q8NB16	184	MLKL_HUMAN Mixed lineage kinase domain-like protein OS=Homo sapiens OX=9606 GN=MLKL PE=1 SV=1	ND	ND	1.11111	1.19048	1.1508	0.0561231	0.202631
392	P14635	238	CCNB1_HUMAN G2/mitotic-specific cyclin-B1 OS=Homo sapiens OX=9606 GN=CCNB1 PE=1 SV=1	ND	1.1236	1.17647	ND	1.15003	0.0373847	0.201678
393	Q9Y6Q9	646	NCOA3_HUMAN Nuclear receptor coactivator 3 OS=Homo sapiens OX=9606 GN=NCOA3 PE=1 SV=1	ND	0.98039	1.05553	1.41378	1.1499	0.231594	0.201508
394	O60936	109	NOL3_HUMAN Nucleolar protein 3 OS=Homo sapiens OX=9606 GN=NOL3 PE=1 SV=2	1.08696	1.2987	1.06383	ND	1.14983	0.129443	0.201421
395	P46100	1531	ATRX_HUMAN Transcriptional regulator ATRX OS=Homo sapiens OX=9606 GN=ATRX PE=1 SV=5	ND	1.16279	1.13636	ND	1.14958	0.0186888	0.201101
396	B4DYY5	150	B4DYY5_HUMAN cDNA FLJ55671, highly similar to Ubiquitin-associated protein 2-like OS=Homo sapiens OX=9606 PE=2 SV=1	ND	ND	1.14943	ND	1.14943		0.200919
397	O95071	2267	UBR5_HUMAN E3 ubiquitin-protein ligase UBR5 OS=Homo sapiens OX=9606 GN=UBR5 PE=1 SV=2	ND	1.14943	ND	ND	1.14943		0.200919
398	Q5T7V8	354	GORAB_HUMAN RAB6-interacting golgin OS=Homo sapiens OX=9606 GN=GORAB PE=1 SV=1	ND	ND	1.14943	ND	1.14943		0.200919
399	Q70CQ4	465	UBP31_HUMAN Ubiquitin carboxyl-terminal hydrolase 31 OS=Homo sapiens OX=9606 GN=USP31 PE=2 SV=2	ND	ND	1.14943	ND	1.14943		0.200919
400	Q86VY4	153	TSYL5_HUMAN Testis-specific Y-encoded-like protein 5 OS=Homo sapiens OX=9606 GN=TSPYL5 PE=1 SV=2	ND	1.14943	ND	ND	1.14943		0.200919
401	Q9P275	638	UBP36_HUMAN Ubiquitin carboxyl-terminal hydrolase 36 OS=Homo sapiens OX=9606 GN=USP36 PE=1 SV=4	ND	ND	1.14943	ND	1.14943		0.200919
402	Q93009	315	UBP7_HUMAN Ubiquitin carboxyl-terminal hydrolase 7 OS=Homo sapiens OX=9606 GN=USP7 PE=1 SV=2	1.19318	1.07539	1.09053	1.23542	1.14863	0.0780105	0.199914
403	Q12933	171	TRAF2_HUMAN TNF receptor-associated factor 2 OS=Homo sapiens OX=9606 GN=TRAF2 PE=1 SV=2	1.07527	1.14943	1.16279	1.20482	1.14808	0.053972	0.19922
404	Q96Q11	373	TRNT1_HUMAN CCA tRNA nucleotidyltransferase 1, mitochondrial OS=Homo sapiens OX=9606 GN=TRNT1 PE=1 SV=2	1.22926	1.1236	1.17647	1.05847	1.14695	0.073076	0.197803	Disulfide bond	Note=Interchain
405	P21399	369	ACOC_HUMAN Cytoplasmic aconitate hydratase OS=Homo sapiens OX=9606 GN=ACO1 PE=1 SV=3	ND	1.15797	1.46221	0.81972	1.14663	0.321395	0.197404
406	P23141	390	EST1_HUMAN Liver carboxylesterase 1 OS=Homo sapiens OX=9606 GN=CES1 PE=1 SV=2	ND	0.96154	1.11111	1.36369	1.14545	0.203262	0.19591
407	A8K8F0	45	A8K8F0_HUMAN cDNA FLJ76436 OS=Homo sapiens OX=9606 PE=2 SV=1	ND	1.47059	1.12396	0.83957	1.14471	0.316021	0.194978
408	P15170	327	ERF3A_HUMAN Eukaryotic peptide chain release factor GTP-binding subunit ERF3A OS=Homo sapiens OX=9606 GN=GSPT1 PE=1 SV=1	1.11111	1.1236	1.1236	1.21951	1.14445	0.0503819	0.194661
409	P62633	161	CNBP_HUMAN Cellular nucleic acid-binding protein OS=Homo sapiens OX=9606 GN=CNBP PE=1 SV=1	ND	1.1236	1.26582	1.04167	1.1437	0.113418	0.193704
410	P18031	121	PTN1_HUMAN Tyrosine-protein phosphatase non-receptor type 1 OS=Homo sapiens OX=9606 GN=PTPN1 PE=1 SV=1	ND	1.16279	1.1236	ND	1.14319	0.0277115	0.193072
411	Q8IYS1	14	P20D2_HUMAN Peptidase M20 domain-containing protein 2 OS=Homo sapiens OX=9606 GN=PM20D2 PE=1 SV=2	ND	ND	1.14312	ND	1.14312		0.192977
412	Q9NRA8	767	4ET_HUMAN Eukaryotic translation initiation factor 4E transporter OS=Homo sapiens OX=9606 GN=EIF4ENIF1 PE=1 SV=2	ND	1.33333	0.95238	ND	1.14285	0.269372	0.192642
413	Q9HC35	311	EMAL4_HUMAN Echinoderm microtubule-associated protein-like 4 OS=Homo sapiens OX=9606 GN=EML4 PE=1 SV=3	1.13636	1.16848	ND	1.1236	1.14281	0.0231255	0.19259
414	O00170	121	AIP_HUMAN AH receptor-interacting protein OS=Homo sapiens OX=9606 GN=AIP PE=1 SV=2	1.1236	1.10582	1.13636	1.20482	1.14265	0.0432975	0.192384
415	Q9Y613	502	FHOD1_HUMAN FH1/FH2 domain-containing protein 1 OS=Homo sapiens OX=9606 GN=FHOD1 PE=1 SV=3	1.11224	1.16531	1.14507	1.14589	1.14213	0.0220114	0.191724
416	P50851	1228	LRBA_HUMAN Lipopolysaccharide-responsive and beige-like anchor protein OS=Homo sapiens OX=9606 GN=LRBA PE=1 SV=4	0.98039	ND	1.2987	ND	1.13955	0.225079	0.188458
417	Q9Y4H2	409	IRS2_HUMAN Insulin receptor substrate 2 OS=Homo sapiens OX=9606 GN=IRS2 PE=1 SV=2	ND	1.2987	ND	0.98039	1.13955	0.225079	0.188458
418	Q9HA64	24	KT3K_HUMAN Ketosamine-3-kinase OS=Homo sapiens OX=9606 GN=FN3KRP PE=1 SV=2	1.18047	1.03002	1.23816	1.10863	1.13932	0.0900945	0.188173
419	P34932	34	HSP74_HUMAN Heat shock 70 kDa protein 4 OS=Homo sapiens OX=9606 GN=HSPA4 PE=1 SV=4	1.14663	1.1269	1.14943	1.13416	1.13928	0.0105913	0.188122
420	Q99439	175	CNN2_HUMAN Calponin-2 OS=Homo sapiens OX=9606 GN=CNN2 PE=1 SV=4	1.21951	ND	ND	1.05839	1.13895	0.113929	0.187704
421	Q9BWU0	730	NADAP_HUMAN Kanadaptin OS=Homo sapiens OX=9606 GN=SLC4A1AP PE=1 SV=1	1.1107	1.08915	1.19048	1.16279	1.13828	0.0465474	0.186855
422	Q5GLZ8	392	HERC4_HUMAN Probable E3 ubiquitin-protein ligase HERC4 OS=Homo sapiens OX=9606 GN=HERC4 PE=1 SV=1	1.0989	1.0989	1.20482	1.14943	1.13801	0.050508	0.186516
423	P06733	357	ENOA_HUMAN Alpha-enolase OS=Homo sapiens OX=9606 GN=ENO1 PE=1 SV=2	ND	0.82645	1.44928	ND	1.13786	0.440407	0.186329
424	P36957	66	ODO2_HUMAN Dihydrolipoyllysine-residue succinyltransferase component of 2-oxoglutarate dehydrogenase complex, mitochondrial OS=Homo sapiens OX=9606 GN=DLST PE=1 SV=4	ND	ND	1.11111	1.16279	1.13695	0.0365433	0.185169
425	P01130	839	LDLR_HUMAN Low-density lipoprotein receptor OS=Homo sapiens OX=9606 GN=LDLR PE=1 SV=1	ND	ND	1.38889	0.88496	1.13692	0.356332	0.185137	Disulfide bond&Mutagenesis	.$Note=No change. Insensitive to MYLIP-triggered degradation%3B when associated with R-830. Insensitive to MYLIP-triggered degradation%3B when associated with R-816 and R-830. Insensitive to MYLIP-triggered degradation%3B when associated with R-811%3B R-816 and R-830. C->A;Ontology_term=ECO:0000269;evidence=ECO:0000269|PubMed:19520913;Dbxref=PMID:19520913
426	Q96P48	995	ARAP1_HUMAN Arf-GAP with Rho-GAP domain, ANK repeat and PH domain-containing protein 1 OS=Homo sapiens OX=9606 GN=ARAP1 PE=1 SV=3	1.13636	1.14943	1.13636	1.1236	1.13644	0.0105454	0.184518
427	P23919	31	KTHY_HUMAN Thymidylate kinase OS=Homo sapiens OX=9606 GN=DTYMK PE=1 SV=4	ND	1.13636	ND	1.13636	1.13636	0	0.18442
428	P35227	233	PCGF2_HUMAN Polycomb group RING finger protein 2 OS=Homo sapiens OX=9606 GN=PCGF2 PE=1 SV=1	1.13636	ND	ND	ND	1.13636		0.18442
429	Q70Z35	659	PREX2_HUMAN Phosphatidylinositol 3,4,5-trisphosphate-dependent Rac exchanger 2 protein OS=Homo sapiens OX=9606 GN=PREX2 PE=2 SV=1	ND	ND	ND	1.13636	1.13636		0.18442
430	Q8IWS0	28	PHF6_HUMAN PHD finger protein 6 OS=Homo sapiens OX=9606 GN=PHF6 PE=1 SV=1	ND	ND	ND	1.13636	1.13636		0.18442
431	Q96AB6	118	NTAN1_HUMAN Protein N-terminal asparagine amidohydrolase OS=Homo sapiens OX=9606 GN=NTAN1 PE=1 SV=3	ND	ND	ND	1.13636	1.13636		0.18442
432	Q5T6V5	227	QSPP_HUMAN Queuosine salvage protein OS=Homo sapiens OX=9606 GN=C9orf64 PE=1 SV=1	ND	1.05263	1.21951	ND	1.13607	0.118002	0.184052
433	Q9C0I1	152	MTMRC_HUMAN Myotubularin-related protein 12 OS=Homo sapiens OX=9606 GN=MTMR12 PE=1 SV=2	ND	ND	0.8	1.47059	1.1353	0.474179	0.183067
434	Q9NQT5	215	EXOS3_HUMAN Exosome complex component RRP40 OS=Homo sapiens OX=9606 GN=EXOSC3 PE=1 SV=3	1.40845	1.42857	0.93458	0.76923	1.13521	0.334123	0.182956
435	Q9NR09	777	BIRC6_HUMAN Baculoviral IAP repeat-containing protein 6 OS=Homo sapiens OX=9606 GN=BIRC6 PE=1 SV=2	1.1236	1.07944	1.19431	1.14335	1.13517	0.047624	0.182915
436	P07199	65	CENPB_HUMAN Major centromere autoantigen B OS=Homo sapiens OX=9606 GN=CENPB PE=1 SV=2	1.0068	1.192	1.16279	1.17647	1.13451	0.0859755	0.182076
437	Q07866	114	KLC1_HUMAN Kinesin light chain 1 OS=Homo sapiens OX=9606 GN=KLC1 PE=1 SV=2	0.9901	1.23457	1.17688	ND	1.13385	0.127789	0.18123
438	Q9HD45	428	TM9S3_HUMAN Transmembrane 9 superfamily member 3 OS=Homo sapiens OX=9606 GN=TM9SF3 PE=1 SV=2	ND	1.11819	1.14943	ND	1.13381	0.02209	0.181179
439	P46379	349	BAG6_HUMAN Large proline-rich protein BAG6 OS=Homo sapiens OX=9606 GN=BAG6 PE=1 SV=2	1.07527	1.10478	1.10493	1.2502	1.1338	0.0788466	0.18116
440	P11216	319	PYGB_HUMAN Glycogen phosphorylase, brain form OS=Homo sapiens OX=9606 GN=PYGB PE=1 SV=5	ND	0.9901	1.21951	1.19048	1.13336	0.124916	0.18061
441	Q9HBI6	50	CP4FB_HUMAN Phylloquinone omega-hydroxylase CYP4F11 OS=Homo sapiens OX=9606 GN=CYP4F11 PE=1 SV=3	ND	1.03093	1.09903	1.26582	1.13193	0.120851	0.17878
442	Q14146	931	URB2_HUMAN Unhealthy ribosome biogenesis protein 2 homolog OS=Homo sapiens OX=9606 GN=URB2 PE=2 SV=2	ND	ND	1.14004	1.1236	1.13182	0.0116248	0.178645
443	Q8IXT5	204	RB12B_HUMAN RNA-binding protein 12B OS=Homo sapiens OX=9606 GN=RBM12B PE=1 SV=2	1.16279	ND	ND	1.0989	1.13084	0.0451771	0.177401
444	P17302	298	CXA1_HUMAN Gap junction alpha-1 protein OS=Homo sapiens OX=9606 GN=GJA1 PE=1 SV=2	1.0989	1.13636	1.1236	1.16279	1.13041	0.0266028	0.176849
445	Q8TAP6	89	CEP76_HUMAN Centrosomal protein of 76 kDa OS=Homo sapiens OX=9606 GN=CEP76 PE=1 SV=1	ND	1.11111	1.14943	ND	1.13027	0.0270963	0.176667
446	P45880	13	VDAC2_HUMAN Voltage-dependent anion-selective channel protein 2 OS=Homo sapiens OX=9606 GN=VDAC2 PE=1 SV=2	1.26353	1.1069	1.08186	1.06742	1.12993	0.0905494	0.17623
447	Q9NP73	86	ALG13_HUMAN Putative bifunctional UDP-N-acetylglucosamine transferase and deubiquitinase ALG13 OS=Homo sapiens OX=9606 GN=ALG13 PE=1 SV=2	1.05263	1.11111	1.11111	1.24228	1.12928	0.0802175	0.175406
448	Q53GS7	7	GLE1_HUMAN Nucleoporin GLE1 OS=Homo sapiens OX=9606 GN=GLE1 PE=1 SV=2	1.1236	1.14943	ND	1.11111	1.12805	0.0195432	0.173827
449	P42704	571	LPPRC_HUMAN Leucine-rich PPR motif-containing protein, mitochondrial OS=Homo sapiens OX=9606 GN=LRPPRC PE=1 SV=3	1.20208	1.1236	1.11111	1.07527	1.12801	0.0534569	0.173786
450	Q68CZ2	888	TENS3_HUMAN Tensin-3 OS=Homo sapiens OX=9606 GN=TNS3 PE=1 SV=2	1.07539	1.2268	1.06133	1.14716	1.12767	0.0760281	0.173345
451	Q7Z3T8	304	ZFY16_HUMAN Zinc finger FYVE domain-containing protein 16 OS=Homo sapiens OX=9606 GN=ZFYVE16 PE=1 SV=3	1.02041	1.15003	1.23457	1.0989	1.12598	0.0899047	0.171178
452	Q6P1L5	198	F117B_HUMAN Protein FAM117B OS=Homo sapiens OX=9606 GN=FAM117B PE=1 SV=2	1.21951	ND	0.90841	1.25	1.12597	0.189031	0.171173
453	Q9NXG2	31	THUM1_HUMAN THUMP domain-containing protein 1 OS=Homo sapiens OX=9606 GN=THUMPD1 PE=1 SV=2	ND	1.0101	1.19048	1.17647	1.12568	0.100343	0.170801
454	Q9Y4H2	802	IRS2_HUMAN Insulin receptor substrate 2 OS=Homo sapiens OX=9606 GN=IRS2 PE=1 SV=2	ND	1.11111	1.07527	1.19048	1.12562	0.0589597	0.17072
455	O94808	226	GFPT2_HUMAN Glutamine--fructose-6-phosphate aminotransferase [isomerizing] 2 OS=Homo sapiens OX=9606 GN=GFPT2 PE=1 SV=3	ND	1.17336	1.19302	1.0101	1.12549	0.100416	0.170558
456	Q00653	738	NFKB2_HUMAN Nuclear factor NF-kappa-B p100 subunit OS=Homo sapiens OX=9606 GN=NFKB2 PE=1 SV=4	1.17647	1.08696	1.14943	1.08801	1.12522	0.0449485	0.170204
457	E5KTA6	30	E5KTA6_HUMAN Uracil-DNA glycosylase OS=Homo sapiens OX=9606 GN=UNG PE=3 SV=1	1.19048	1.02041	ND	1.16279	1.12456	0.091253	0.169361
458	P42166	518	LAP2A_HUMAN Lamina-associated polypeptide 2, isoform alpha OS=Homo sapiens OX=9606 GN=TMPO PE=1 SV=2	ND	1.0945	1.16673	1.11111	1.12411	0.03783	0.168787
459	Q15392	91	DHC24_HUMAN Delta(24)-sterol reductase OS=Homo sapiens OX=9606 GN=DHCR24 PE=1 SV=2	ND	ND	1.1236	ND	1.1236		0.168129
460	Q5EBL4	47	RIPL1_HUMAN RILP-like protein 1 OS=Homo sapiens OX=9606 GN=RILPL1 PE=1 SV=1	ND	ND	ND	1.1236	1.1236		0.168129	Modified residue	Note=S-nitrosocysteine;Ontology_term=ECO:0000250;evidence=ECO:0000250|UniProtKB:D3ZUQ0
461	Q6PI48	590	SYDM_HUMAN Aspartate--tRNA ligase, mitochondrial OS=Homo sapiens OX=9606 GN=DARS2 PE=1 SV=1	ND	1.1236	ND	ND	1.1236		0.168129
462	Q7L2J0	54	MEPCE_HUMAN 7SK snRNA methylphosphate capping enzyme OS=Homo sapiens OX=9606 GN=MEPCE PE=1 SV=1	ND	ND	1.1236	ND	1.1236		0.168129
463	Q7L7V1	329	DHX32_HUMAN Putative pre-mRNA-splicing factor ATP-dependent RNA helicase DHX32 OS=Homo sapiens OX=9606 GN=DHX32 PE=1 SV=1	ND	ND	ND	1.1236	1.1236		0.168129
464	Q96BY7	1597	ATG2B_HUMAN Autophagy-related protein 2 homolog B OS=Homo sapiens OX=9606 GN=ATG2B PE=1 SV=5	ND	ND	1.1236	ND	1.1236		0.168129
465	Q9BXJ9	721	NAA15_HUMAN N-alpha-acetyltransferase 15, NatA auxiliary subunit OS=Homo sapiens OX=9606 GN=NAA15 PE=1 SV=1	1.1236	ND	ND	ND	1.1236		0.168129
466	Q9NXD2	564	MTMRA_HUMAN Myotubularin-related protein 10 OS=Homo sapiens OX=9606 GN=MTMR10 PE=1 SV=3	ND	ND	1.1236	ND	1.1236		0.168129
467	Q9Y6Q9	31	NCOA3_HUMAN Nuclear receptor coactivator 3 OS=Homo sapiens OX=9606 GN=NCOA3 PE=1 SV=1	1.1236	ND	ND	ND	1.1236		0.168129
468	P00390	102	GSHR_HUMAN Glutathione reductase, mitochondrial OS=Homo sapiens OX=9606 GN=GSR PE=1 SV=2	1.12606	1.11749	1.1215	1.12874	1.12345	0.00497059	0.167933	Disulfide bond	Note=Redox-active;Ontology_term=ECO:0000269;evidence=ECO:0000269|PubMed:8626496;Dbxref=PMID:8626496
469	Q9ULJ3	129	ZBT21_HUMAN Zinc finger and BTB domain-containing protein 21 OS=Homo sapiens OX=9606 GN=ZBTB21 PE=1 SV=2	1.21951	1.04268	1.21951	1.0101	1.12295	0.112288	0.167294
470	O75131	54	CPNE3_HUMAN Copine-3 OS=Homo sapiens OX=9606 GN=CPNE3 PE=1 SV=1	1.10041	1.05883	1.16273	1.16545	1.12186	0.0516505	0.165886
471	Q9P2P5	436	HECW2_HUMAN E3 ubiquitin-protein ligase HECW2 OS=Homo sapiens OX=9606 GN=HECW2 PE=1 SV=2	ND	1.06667	1.17647	ND	1.12157	0.0776403	0.16552
472	Q9H832	100	UBE2Z_HUMAN Ubiquitin-conjugating enzyme E2 Z OS=Homo sapiens OX=9606 GN=UBE2Z PE=1 SV=2	0.9434	1.25253	1.25623	1.03394	1.12152	0.157805	0.165462
473	P61289	92	PSME3_HUMAN Proteasome activator complex subunit 3 OS=Homo sapiens OX=9606 GN=PSME3 PE=1 SV=1	1.22453	1.17244	1.13636	0.95161	1.12123	0.118734	0.165089
474	Q96C86	37	DCPS_HUMAN m7GpppX diphosphatase OS=Homo sapiens OX=9606 GN=DCPS PE=1 SV=2	ND	0.97087	1.13009	1.26102	1.12066	0.145305	0.164349
475	Q13573	250	SNW1_HUMAN SNW domain-containing protein 1 OS=Homo sapiens OX=9606 GN=SNW1 PE=1 SV=1	ND	1.13063	1.05413	1.17663	1.12046	0.0618796	0.164095
476	P49915	631	GUAA_HUMAN GMP synthase [glutamine-hydrolyzing] OS=Homo sapiens OX=9606 GN=GMPS PE=1 SV=1	1.08696	1.14556	1.11111	1.13636	1.12	0.0264048	0.163496
477	Q96H55	678	MYO19_HUMAN Unconventional myosin-XIX OS=Homo sapiens OX=9606 GN=MYO19 PE=1 SV=2	0.9901	1.18347	1.18581	ND	1.11979	0.112324	0.163232
478	Q9Y6Y8	604	S23IP_HUMAN SEC23-interacting protein OS=Homo sapiens OX=9606 GN=SEC23IP PE=1 SV=1	1.17647	1.19765	1.14394	0.95999	1.11951	0.108618	0.162871
479	Q16666	679	IF16_HUMAN Gamma-interferon-inducible protein 16 OS=Homo sapiens OX=9606 GN=IFI16 PE=1 SV=3	ND	ND	1.16279	1.07527	1.11903	0.061886	0.162249
480	Q9UJA2	230	CRLS1_HUMAN Cardiolipin synthase (CMP-forming) OS=Homo sapiens OX=9606 GN=CRLS1 PE=1 SV=1	ND	1.08696	1.14943	ND	1.1182	0.044173	0.161172
481	Q96FV9	49	THOC1_HUMAN THO complex subunit 1 OS=Homo sapiens OX=9606 GN=THOC1 PE=1 SV=1	1.1236	1.22453	1.04655	1.07665	1.11783	0.0778777	0.160704
482	Q8TBC3	667	SHKB1_HUMAN SH3KBP1-binding protein 1 OS=Homo sapiens OX=9606 GN=SHKBP1 PE=1 SV=2	ND	ND	1.0989	1.13636	1.11763	0.0264882	0.160443
483	Q7Z6K5	183	ARPIN_HUMAN Arpin OS=Homo sapiens OX=9606 GN=ARPIN PE=1 SV=1	1.1236	1.13027	ND	1.0989	1.11759	0.016526	0.160391
484	O00567	211	NOP56_HUMAN Nucleolar protein 56 OS=Homo sapiens OX=9606 GN=NOP56 PE=1 SV=4	ND	ND	1.11111	1.1236	1.11735	0.00883176	0.160088
485	Q9Y512	237	SAM50_HUMAN Sorting and assembly machinery component 50 homolog OS=Homo sapiens OX=9606 GN=SAMM50 PE=1 SV=3	1.05263	1.0101	1.10223	1.2987	1.11591	0.12754	0.158227
486	Q68CZ2	1241	TENS3_HUMAN Tensin-3 OS=Homo sapiens OX=9606 GN=TNS3 PE=1 SV=2	1.20482	1.10453	1.08127	1.07072	1.11533	0.0613059	0.157477
487	Q9NQX3	284	GEPH_HUMAN Gephyrin OS=Homo sapiens OX=9606 GN=GPHN PE=1 SV=1	1.20732	1.06189	1.07527	ND	1.11483	0.0803805	0.156819
488	A8K8D9	13	A8K8D9_HUMAN Glucose-6-phosphate 1-dehydrogenase OS=Homo sapiens OX=9606 PE=2 SV=1	ND	ND	ND	1.11447	1.11447		0.156358
489	Q9P2D3	1137	HTR5B_HUMAN HEAT repeat-containing protein 5B OS=Homo sapiens OX=9606 GN=HEATR5B PE=1 SV=2	ND	0.97087	1.06383	1.30757	1.11409	0.173886	0.155866
490	P51114	211	FXR1_HUMAN Fragile X mental retardation syndrome-related protein 1 OS=Homo sapiens OX=9606 GN=FXR1 PE=1 SV=3	1.17647	1.1236	1	1.14943	1.11237	0.0779645	0.153643
491	Q92615	633	LAR4B_HUMAN La-related protein 4B OS=Homo sapiens OX=9606 GN=LARP4B PE=1 SV=3	1.11111	1.12596	1.16592	1.0451	1.11202	0.0502615	0.153186
492	A0A0A0MTC1	4456	A0A0A0MTC1_HUMAN E3 ubiquitin-protein ligase RNF213 OS=Homo sapiens OX=9606 GN=RNF213 PE=1 SV=1	1.16279	1.0989	1.08696	1.0989	1.11189	0.0343986	0.153011
493	E9PNI5	107	E9PNI5_HUMAN Sorting nexin-15 OS=Homo sapiens OX=9606 GN=SNX15 PE=1 SV=1	ND	ND	1.11111	ND	1.11111		0.152002
494	O14686	1909	KMT2D_HUMAN Histone-lysine N-methyltransferase 2D OS=Homo sapiens OX=9606 GN=KMT2D PE=1 SV=2	ND	ND	ND	1.11111	1.11111		0.152002
495	P29144	28	TPP2_HUMAN Tripeptidyl-peptidase 2 OS=Homo sapiens OX=9606 GN=TPP2 PE=1 SV=4	1.11111	ND	ND	ND	1.11111		0.152002
496	P37268	6	FDFT_HUMAN Squalene synthase OS=Homo sapiens OX=9606 GN=FDFT1 PE=1 SV=1	ND	1.11111	ND	ND	1.11111		0.152002
497	P48431	265	SOX2_HUMAN Transcription factor SOX-2 OS=Homo sapiens OX=9606 GN=SOX2 PE=1 SV=1	ND	ND	1.11111	ND	1.11111		0.152002
498	Q03169	512	TNAP2_HUMAN Tumor necrosis factor alpha-induced protein 2 OS=Homo sapiens OX=9606 GN=TNFAIP2 PE=2 SV=2	ND	ND	1.11111	ND	1.11111		0.152002
499	Q13042	544	CDC16_HUMAN Cell division cycle protein 16 homolog OS=Homo sapiens OX=9606 GN=CDC16 PE=1 SV=2	ND	ND	1.11111	ND	1.11111		0.152002
500	Q52M93	440	Z585B_HUMAN Zinc finger protein 585B OS=Homo sapiens OX=9606 GN=ZNF585B PE=2 SV=1	ND	ND	1.11111	ND	1.11111		0.152002
501	Q5T160	576	SYRM_HUMAN Probable arginine--tRNA ligase, mitochondrial OS=Homo sapiens OX=9606 GN=RARS2 PE=1 SV=1	ND	1.11111	ND	ND	1.11111		0.152002
502	Q86XL3	91	ANKL2_HUMAN Ankyrin repeat and LEM domain-containing protein 2 OS=Homo sapiens OX=9606 GN=ANKLE2 PE=1 SV=4	ND	ND	ND	1.11111	1.11111		0.152002
503	Q8WUM4	250	PDC6I_HUMAN Programmed cell death 6-interacting protein OS=Homo sapiens OX=9606 GN=PDCD6IP PE=1 SV=1	ND	1.11111	ND	ND	1.11111		0.152002
504	Q9BU89	232	DOHH_HUMAN Deoxyhypusine hydroxylase OS=Homo sapiens OX=9606 GN=DOHH PE=1 SV=1	ND	ND	1.11111	ND	1.11111		0.152002
505	Q9NS87	576	KIF15_HUMAN Kinesin-like protein KIF15 OS=Homo sapiens OX=9606 GN=KIF15 PE=1 SV=1	ND	ND	1.11111	ND	1.11111		0.152002
506	Q9NV70	650	EXOC1_HUMAN Exocyst complex component 1 OS=Homo sapiens OX=9606 GN=EXOC1 PE=1 SV=4	1.11111	ND	ND	ND	1.11111		0.152002
507	Q05823	639	RN5A_HUMAN 2-5A-dependent ribonuclease OS=Homo sapiens OX=9606 GN=RNASEL PE=1 SV=2	1	1.16091	1.13519	1.14809	1.11105	0.0747726	0.15192
508	O15226	37	NKRF_HUMAN NF-kappa-B-repressing factor OS=Homo sapiens OX=9606 GN=NKRF PE=1 SV=2	ND	1.07944	1.07241	1.18127	1.11104	0.0609224	0.151911
509	Q9P258	144	RCC2_HUMAN Protein RCC2 OS=Homo sapiens OX=9606 GN=RCC2 PE=1 SV=2	0.98039	1.21431	1.0989	1.14943	1.11076	0.0989191	0.151544
510	Q96ST3	425	SIN3A_HUMAN Paired amphipathic helix protein Sin3a OS=Homo sapiens OX=9606 GN=SIN3A PE=1 SV=2	ND	0.92262	1.2987	ND	1.11066	0.265929	0.151417
511	P47756	206	CAPZB_HUMAN F-actin-capping protein subunit beta OS=Homo sapiens OX=9606 GN=CAPZB PE=1 SV=4	1.0101	1.2302	1.04529	1.15528	1.11022	0.101103	0.150842
512	O00443	418	P3C2A_HUMAN Phosphatidylinositol 4-phosphate 3-kinase C2 domain-containing subunit alpha OS=Homo sapiens OX=9606 GN=PIK3C2A PE=1 SV=2	1.08696	1.19048	1.05263	ND	1.11002	0.0717607	0.15059
513	Q02543	22	RL18A_HUMAN 60S ribosomal protein L18a OS=Homo sapiens OX=9606 GN=RPL18A PE=1 SV=2	1.128	1.07933	1.12425	1.10771	1.10982	0.0221572	0.150329
514	Q5VTL8	113	PR38B_HUMAN Pre-mRNA-splicing factor 38B OS=Homo sapiens OX=9606 GN=PRPF38B PE=1 SV=1	1.07077	1.08188	1.16022	1.12637	1.10981	0.0413102	0.150313
515	Q9UHD1	86	CHRD1_HUMAN Cysteine and histidine-rich domain-containing protein 1 OS=Homo sapiens OX=9606 GN=CHORDC1 PE=1 SV=2	1.20195	0.95454	1.45993	0.82016	1.10915	0.282299	0.149448
516	P21980	230	TGM2_HUMAN Protein-glutamine gamma-glutamyltransferase 2 OS=Homo sapiens OX=9606 GN=TGM2 PE=1 SV=2	ND	1.12522	1.15975	1.04167	1.10888	0.0607122	0.149103
517	Q6NUM9	370	RETST_HUMAN All-trans-retinol 13,14-reductase OS=Homo sapiens OX=9606 GN=RETSAT PE=1 SV=2	ND	1.11111	1.16279	1.05263	1.10884	0.055115	0.149056
518	Q9BUH6	180	PAXX_HUMAN Protein PAXX OS=Homo sapiens OX=9606 GN=PAXX PE=1 SV=2	1.14379	1.00619	1.1738	ND	1.10793	0.0893751	0.147862
519	Q9BXP5	412	SRRT_HUMAN Serrate RNA effector molecule homolog OS=Homo sapiens OX=9606 GN=SRRT PE=1 SV=1	1.09571	1.13362	ND	1.09346	1.1076	0.0225649	0.147433
520	Q8NBS9	217	TXND5_HUMAN Thioredoxin domain-containing protein 5 OS=Homo sapiens OX=9606 GN=TXNDC5 PE=1 SV=2	ND	1.14973	1.06383	ND	1.10678	0.0607405	0.146368	Disulfide bond	Note=Redox-active;Ontology_term=ECO:0000255;evidence=ECO:0000255|PROSITE-ProRule:PRU00691
521	O14529	915	CUX2_HUMAN Homeobox protein cut-like 2 OS=Homo sapiens OX=9606 GN=CUX2 PE=1 SV=4	1.02041	ND	1.16279	1.13636	1.10652	0.0757353	0.14603
522	P12955	467	PEPD_HUMAN Xaa-Pro dipeptidase OS=Homo sapiens OX=9606 GN=PEPD PE=1 SV=3	0.8547	1.06383	1.0989	1.40845	1.10647	0.228368	0.145964
523	Q13490	45	BIRC2_HUMAN Baculoviral IAP repeat-containing protein 2 OS=Homo sapiens OX=9606 GN=BIRC2 PE=1 SV=2	ND	1.07843	1.03466	1.20594	1.10634	0.0889864	0.145799
524	P48200	137	IREB2_HUMAN Iron-responsive element-binding protein 2 OS=Homo sapiens OX=9606 GN=IREB2 PE=1 SV=3	ND	1.14943	0.91743	1.25	1.10562	0.170558	0.144856
525	Q15813	141	TBCE_HUMAN Tubulin-specific chaperone E OS=Homo sapiens OX=9606 GN=TBCE PE=1 SV=1	1.15398	1.06383	ND	1.0989	1.10557	0.0454436	0.14479
526	Q9NRU3	842	CNNM1_HUMAN Metal transporter CNNM1 OS=Homo sapiens OX=9606 GN=CNNM1 PE=1 SV=3	ND	1.02041	ND	1.19048	1.10545	0.120258	0.144627
527	O43684	129	BUB3_HUMAN Mitotic checkpoint protein BUB3 OS=Homo sapiens OX=9606 GN=BUB3 PE=1 SV=1	ND	1.03093	1.07488	1.20991	1.10524	0.0932725	0.14436
528	Q96T76	819	MMS19_HUMAN MMS19 nucleotide excision repair protein homolog OS=Homo sapiens OX=9606 GN=MMS19 PE=1 SV=2	ND	1.0989	1.11111	ND	1.10501	0.00863377	0.144053
529	P07437	239	TBB5_HUMAN Tubulin beta chain OS=Homo sapiens OX=9606 GN=TUBB PE=1 SV=2	1.10356	0.98693	1.36986	0.95735	1.10442	0.187876	0.143295
530	Q9NU22	2192	MDN1_HUMAN Midasin OS=Homo sapiens OX=9606 GN=MDN1 PE=1 SV=2	1.17647	1.1236	1.06383	1.05263	1.10413	0.0574122	0.142913
531	Q9NT62	182	ATG3_HUMAN Ubiquitin-like-conjugating enzyme ATG3 OS=Homo sapiens OX=9606 GN=ATG3 PE=1 SV=1	1.1236	1.14943	1.05263	1.08696	1.10316	0.0423258	0.141636
532	P12277	283	KCRB_HUMAN Creatine kinase B-type OS=Homo sapiens OX=9606 GN=CKB PE=1 SV=1	ND	ND	1.11635	1.08861	1.10248	0.0196151	0.140752	Mutagenesis	Note=Complete loss of activity. C->S%2CY;Ontology_term=ECO:0000269;evidence=ECO:0000269|PubMed:8186255;Dbxref=PMID:8186255
533	Q8N1F8	622	S11IP_HUMAN Serine/threonine-protein kinase 11-interacting protein OS=Homo sapiens OX=9606 GN=STK11IP PE=1 SV=4	1.06383	1.15754	1.04661	1.14183	1.10245	0.0553634	0.140716
534	P00533	1058	EGFR_HUMAN Epidermal growth factor receptor OS=Homo sapiens OX=9606 GN=EGFR PE=1 SV=2	ND	1.11111	1.11639	1.07839	1.10196	0.0205851	0.140076	Mutagenesis	Note=Abolishes palmitoylation. Missing;Ontology_term=ECO:0000269;evidence=ECO:0000269|PubMed:27153536;Dbxref=PMID:27153536
535	O60443	45	GSDME_HUMAN Gasdermin-E OS=Homo sapiens OX=9606 GN=GSDME PE=1 SV=2	1.11111	1.13059	ND	1.06383	1.10184	0.0343311	0.139919
536	Q15149	4574	PLEC_HUMAN Plectin OS=Homo sapiens OX=9606 GN=PLEC PE=1 SV=3	1.25	1.04898	1.04167	1.06121	1.10047	0.100015	0.138113
537	Q9Y4H2	1231	IRS2_HUMAN Insulin receptor substrate 2 OS=Homo sapiens OX=9606 GN=IRS2 PE=1 SV=2	1.0101	ND	1.19048	ND	1.10029	0.127548	0.137884
538	Q7Z4S6	1144	KI21A_HUMAN Kinesin-like protein KIF21A OS=Homo sapiens OX=9606 GN=KIF21A PE=1 SV=2	ND	1.13636	1.06383	ND	1.1001	0.0512865	0.137628
539	P85037	665	FOXK1_HUMAN Forkhead box protein K1 OS=Homo sapiens OX=9606 GN=FOXK1 PE=1 SV=1	1.08696	ND	ND	1.11111	1.09903	0.0170766	0.136237
540	Q16543	64	CDC37_HUMAN Hsp90 co-chaperone Cdc37 OS=Homo sapiens OX=9606 GN=CDC37 PE=1 SV=1	ND	1.08696	1.11111	ND	1.09903	0.0170766	0.136237
541	A6H8X9	869	A6H8X9_HUMAN Centrosomal protein 170kDa OS=Homo sapiens OX=9606 GN=CEP170 PE=2 SV=1	ND	1.0989	ND	ND	1.0989		0.13606
542	H0Y2S9	1298	H0Y2S9_HUMAN Myosin phosphatase Rho-interacting protein (Fragment) OS=Homo sapiens OX=9606 GN=MPRIP PE=1 SV=3	ND	1.0989	ND	ND	1.0989		0.13606
543	O15304	30	SIVA_HUMAN Apoptosis regulatory protein Siva OS=Homo sapiens OX=9606 GN=SIVA1 PE=1 SV=2	ND	ND	ND	1.0989	1.0989		0.13606
544	P35610	92	SOAT1_HUMAN Sterol O-acyltransferase 1 OS=Homo sapiens OX=9606 GN=SOAT1 PE=1 SV=3	ND	1.0989	ND	ND	1.0989		0.13606
545	Q14684	628	RRP1B_HUMAN Ribosomal RNA processing protein 1 homolog B OS=Homo sapiens OX=9606 GN=RRP1B PE=1 SV=3	ND	ND	ND	1.0989	1.0989		0.13606
546	Q8TC07	686	TBC15_HUMAN TBC1 domain family member 15 OS=Homo sapiens OX=9606 GN=TBC1D15 PE=1 SV=2	ND	1.0989	ND	ND	1.0989		0.13606
547	Q96AD5	412	PLPL2_HUMAN Patatin-like phospholipase domain-containing protein 2 OS=Homo sapiens OX=9606 GN=PNPLA2 PE=1 SV=1	ND	1.0989	ND	ND	1.0989		0.13606
548	Q9H479	24	FN3K_HUMAN Fructosamine-3-kinase OS=Homo sapiens OX=9606 GN=FN3K PE=1 SV=1	ND	ND	1.0989	ND	1.0989		0.13606
549	Q9NX70	181	MED29_HUMAN Mediator of RNA polymerase II transcription subunit 29 OS=Homo sapiens OX=9606 GN=MED29 PE=1 SV=1	ND	ND	ND	1.0989	1.0989		0.13606
550	Q9UHR4	194	BI2L1_HUMAN Brain-specific angiogenesis inhibitor 1-associated protein 2-like protein 1 OS=Homo sapiens OX=9606 GN=BAIAP2L1 PE=1 SV=2	ND	1.0989	ND	ND	1.0989		0.13606
551	Q9ULJ8	980	NEB1_HUMAN Neurabin-1 OS=Homo sapiens OX=9606 GN=PPP1R9A PE=1 SV=2	ND	1.0989	ND	ND	1.0989		0.13606
552	Q9Y530	122	OARD1_HUMAN O-acetyl-ADP-ribose deacetylase 1 OS=Homo sapiens OX=9606 GN=OARD1 PE=1 SV=2	ND	ND	1.0989	ND	1.0989		0.13606
553	Q9Y5B0	73	CTDP1_HUMAN RNA polymerase II subunit A C-terminal domain phosphatase OS=Homo sapiens OX=9606 GN=CTDP1 PE=1 SV=3	ND	ND	ND	1.0989	1.0989		0.13606
554	Q96SB3	270	NEB2_HUMAN Neurabin-2 OS=Homo sapiens OX=9606 GN=PPP1R9B PE=1 SV=2	1.0601	1.12485	1.11111	1.0989	1.09874	0.0278557	0.13585
555	Q8NB90	291	SPAT5_HUMAN Spermatogenesis-associated protein 5 OS=Homo sapiens OX=9606 GN=SPATA5 PE=1 SV=3	0.92593	1.19048	1.25791	1.02041	1.09868	0.15248	0.135775
556	Q86UY0	145	Q86UY0_HUMAN TXNDC5 protein OS=Homo sapiens OX=9606 GN=TXNDC5 PE=1 SV=1	1.16279	ND	ND	1.0335	1.09815	0.0914218	0.135069
557	O95340	350	PAPS2_HUMAN Bifunctional 3'-phosphoadenosine 5'-phosphosulfate synthase 2 OS=Homo sapiens OX=9606 GN=PAPSS2 PE=1 SV=2	ND	0.95238	1.24386	ND	1.09812	0.206107	0.135036
558	Q99873	119	ANM1_HUMAN Protein arginine N-methyltransferase 1 OS=Homo sapiens OX=9606 GN=PRMT1 PE=1 SV=3	1.13211	ND	1.06383	ND	1.09797	0.0482813	0.134839
559	Q9Y3A2	201	UTP11_HUMAN Probable U3 small nucleolar RNA-associated protein 11 OS=Homo sapiens OX=9606 GN=UTP11 PE=1 SV=2	ND	1.08696	ND	1.10704	1.097	0.0141987	0.133564
560	Q15021	286	CND1_HUMAN Condensin complex subunit 1 OS=Homo sapiens OX=9606 GN=NCAPD2 PE=1 SV=3	1.07819	1.12745	1.09897	1.08117	1.09644	0.0226146	0.132833
561	Q7Z3D4	174	LYSM3_HUMAN LysM and putative peptidoglycan-binding domain-containing protein 3 OS=Homo sapiens OX=9606 GN=LYSMD3 PE=1 SV=2	ND	ND	1.09617	ND	1.09617		0.132472
562	Q15648	681	MED1_HUMAN Mediator of RNA polymerase II transcription subunit 1 OS=Homo sapiens OX=9606 GN=MED1 PE=1 SV=4	ND	ND	1.23457	0.95749	1.09603	0.195925	0.132287
563	O43747	539	AP1G1_HUMAN AP-1 complex subunit gamma-1 OS=Homo sapiens OX=9606 GN=AP1G1 PE=1 SV=5	1.1211	1.08696	1.09954	1.07563	1.09581	0.0194855	0.131994
564	Q13415	98	ORC1_HUMAN Origin recognition complex subunit 1 OS=Homo sapiens OX=9606 GN=ORC1 PE=1 SV=2	ND	1.25	1	1.03093	1.09364	0.136289	0.129142
565	A0A126LAW8	276	A0A126LAW8_HUMAN Pp41 transactivator OS=Homo sapiens OX=9606 GN=U27 PE=4 SV=1	1.09319	ND	ND	ND	1.09319		0.128544
566	A6NHR9	1967	SMHD1_HUMAN Structural maintenance of chromosomes flexible hinge domain-containing protein 1 OS=Homo sapiens OX=9606 GN=SMCHD1 PE=1 SV=2	1.08696	ND	ND	1.0989	1.09293	0.00844285	0.128201
567	Q8NEC7	140	GSTCD_HUMAN Glutathione S-transferase C-terminal domain-containing protein OS=Homo sapiens OX=9606 GN=GSTCD PE=1 SV=2	ND	0.98039	1.20482	ND	1.09261	0.158696	0.127772
568	O94916	566	NFAT5_HUMAN Nuclear factor of activated T-cells 5 OS=Homo sapiens OX=9606 GN=NFAT5 PE=1 SV=1	ND	1.02041	1.16279	ND	1.0916	0.100678	0.126444
569	P52756	766	RBM5_HUMAN RNA-binding protein 5 OS=Homo sapiens OX=9606 GN=RBM5 PE=1 SV=2	1.21951	1.03104	1.08365	1.03137	1.09139	0.0889179	0.12617
570	Q9H6F5	116	CCD86_HUMAN Coiled-coil domain-containing protein 86 OS=Homo sapiens OX=9606 GN=CCDC86 PE=1 SV=1	1.0989	0.94059	1.16279	1.16279	1.09127	0.10487	0.126005
571	P62495	335	ERF1_HUMAN Eukaryotic peptide chain release factor subunit 1 OS=Homo sapiens OX=9606 GN=ETF1 PE=1 SV=3	ND	1.16279	1.0989	1.0101	1.0906	0.0766829	0.125118
572	P07237	397	PDIA1_HUMAN Protein disulfide-isomerase OS=Homo sapiens OX=9606 GN=P4HB PE=1 SV=3	ND	ND	1.14943	1.03093	1.09018	0.0837922	0.124566	Active site&Disulfide bond	Note=Nucleophile;Ontology_term=ECO:0000250;evidence=ECO:0000250$Note=Redox-active;Ontology_term=ECO:0000255;evidence=ECO:0000255|PROSITE-ProRule:PRU00691
573	Q9BQ75	55	CMS1_HUMAN Protein CMSS1 OS=Homo sapiens OX=9606 GN=CMSS1 PE=1 SV=2	1.15611	1.12374	1.04167	1.03803	1.08989	0.059289	0.124179
574	Q8N961	361	ABTB2_HUMAN Ankyrin repeat and BTB/POZ domain-containing protein 2 OS=Homo sapiens OX=9606 GN=ABTB2 PE=2 SV=2	1.06015	1.12487	1.13059	1.042	1.0894	0.0449335	0.123537
575	P53701	35	CCHL_HUMAN Cytochrome c-type heme lyase OS=Homo sapiens OX=9606 GN=HCCS PE=1 SV=1	ND	1.05263	1.12588	ND	1.08926	0.0517956	0.123342
576	O00116	226	ADAS_HUMAN Alkyldihydroxyacetonephosphate synthase, peroxisomal OS=Homo sapiens OX=9606 GN=AGPS PE=1 SV=1	ND	1.04167	ND	1.13636	1.08902	0.0669559	0.123024
577	O60701	112	UGDH_HUMAN UDP-glucose 6-dehydrogenase OS=Homo sapiens OX=9606 GN=UGDH PE=1 SV=1	ND	1.04167	1.13636	ND	1.08902	0.0669559	0.123024
578	Q9UGP4	431	LIMD1_HUMAN LIM domain-containing protein 1 OS=Homo sapiens OX=9606 GN=LIMD1 PE=1 SV=1	1.17647	1.14943	1.07527	0.95238	1.08839	0.100258	0.122192
579	Q9NWY4	17	HPF1_HUMAN Histone PARylation factor 1 OS=Homo sapiens OX=9606 GN=HPF1 PE=1 SV=2	1.13636	1.06477	1.06383	ND	1.08832	0.0416065	0.122103
580	P54886	88	P5CS_HUMAN Delta-1-pyrroline-5-carboxylate synthase OS=Homo sapiens OX=9606 GN=ALDH18A1 PE=1 SV=2	ND	1.01357	1.16279	ND	1.08818	0.105514	0.121917
581	Q6SZW1	552	SARM1_HUMAN Sterile alpha and TIR motif-containing protein 1 OS=Homo sapiens OX=9606 GN=SARM1 PE=1 SV=1	ND	1.05263	ND	1.1236	1.08811	0.0501834	0.121831
582	Q8N6H7	97	ARFG2_HUMAN ADP-ribosylation factor GTPase-activating protein 2 OS=Homo sapiens OX=9606 GN=ARFGAP2 PE=1 SV=1	ND	1.05263	1.1236	ND	1.08811	0.0501834	0.121831
583	O95071	2314	UBR5_HUMAN E3 ubiquitin-protein ligase UBR5 OS=Homo sapiens OX=9606 GN=UBR5 PE=1 SV=2	ND	0.92593	ND	1.25	1.08797	0.229152	0.121632
584	B1AP46	54	B1AP46_HUMAN Exocyst complex component 6 OS=Homo sapiens OX=9606 GN=EXOC6 PE=1 SV=1	ND	ND	1.11111	1.06383	1.08747	0.033432	0.120976
585	O00425	194	IF2B3_HUMAN Insulin-like growth factor 2 mRNA-binding protein 3 OS=Homo sapiens OX=9606 GN=IGF2BP3 PE=1 SV=2	ND	1.06383	ND	1.11111	1.08747	0.033432	0.120976
586	O14672	435	ADA10_HUMAN Disintegrin and metalloproteinase domain-containing protein 10 OS=Homo sapiens OX=9606 GN=ADAM10 PE=1 SV=1	ND	ND	1.06383	1.11111	1.08747	0.033432	0.120976	Disulfide bond&Disulfide bond	Ontology_term=ECO:0000244,ECO:0000244,ECO:0000269;evidence=ECO:0000244|PDB:6BDZ,ECO:0000244|PDB:6BE6,ECO:0000269|PubMed:29224781;Dbxref=PMID:29224781$Ontology_term=ECO:0000244,ECO:0000244,ECO:0000269;evidence=ECO:0000244|PDB:6BDZ,ECO:0000244|PDB:6BE6,ECO:0000269|PubMed:29224781;Dbxref=PMID:29224781
587	Q13509	12	TBB3_HUMAN Tubulin beta-3 chain OS=Homo sapiens OX=9606 GN=TUBB3 PE=1 SV=2	ND	1.08738	ND	ND	1.08738		0.120856
588	Q6NZY4	157	ZCHC8_HUMAN Zinc finger CCHC domain-containing protein 8 OS=Homo sapiens OX=9606 GN=ZCCHC8 PE=1 SV=2	ND	ND	ND	1.08708	1.08708		0.120458
589	L8E8C0	16	L8E8C0_HUMAN Alternative protein MLH1 OS=Homo sapiens OX=9606 GN=MLH1 PE=4 SV=1	ND	1.08696	ND	ND	1.08696		0.120299
590	P08779	40	K1C16_HUMAN Keratin, type I cytoskeletal 16 OS=Homo sapiens OX=9606 GN=KRT16 PE=1 SV=4	ND	ND	1.08696	ND	1.08696		0.120299
591	Q13489	28	BIRC3_HUMAN Baculoviral IAP repeat-containing protein 3 OS=Homo sapiens OX=9606 GN=BIRC3 PE=1 SV=2	ND	1.08696	ND	ND	1.08696		0.120299
592	Q5H9R7	830	PP6R3_HUMAN Serine/threonine-protein phosphatase 6 regulatory subunit 3 OS=Homo sapiens OX=9606 GN=PPP6R3 PE=1 SV=2	ND	1.08696	ND	ND	1.08696		0.120299
593	Q96JQ2	438	CLMN_HUMAN Calmin OS=Homo sapiens OX=9606 GN=CLMN PE=1 SV=1	ND	ND	1.08696	ND	1.08696		0.120299
594	Q9H9L3	168	I20L2_HUMAN Interferon-stimulated 20 kDa exonuclease-like 2 OS=Homo sapiens OX=9606 GN=ISG20L2 PE=1 SV=1	ND	1.08696	ND	ND	1.08696		0.120299
595	Q9Y5W9	181	SNX11_HUMAN Sorting nexin-11 OS=Homo sapiens OX=9606 GN=SNX11 PE=1 SV=2	ND	ND	ND	1.08696	1.08696		0.120299
596	Q92667	147	AKAP1_HUMAN A-kinase anchor protein 1, mitochondrial OS=Homo sapiens OX=9606 GN=AKAP1 PE=1 SV=1	1	1.53529	0.91097	0.9009	1.08679	0.302298	0.120073
597	O75385	552	ULK1_HUMAN Serine/threonine-protein kinase ULK1 OS=Homo sapiens OX=9606 GN=ULK1 PE=1 SV=2	ND	1.23457	0.75758	1.26582	1.08599	0.28484	0.119011
598	Q9BSD7	101	NTPCR_HUMAN Cancer-related nucleoside-triphosphatase OS=Homo sapiens OX=9606 GN=NTPCR PE=1 SV=1	1.05823	1.08696	1.11111	1.08696	1.08581	0.0216286	0.118778
599	Q9Y2X0	539	MED16_HUMAN Mediator of RNA polymerase II transcription subunit 16 OS=Homo sapiens OX=9606 GN=MED16 PE=1 SV=2	1.03093	1.17077	1.01814	1.12005	1.08497	0.0729813	0.117658
600	P17706	330	PTN2_HUMAN Tyrosine-protein phosphatase non-receptor type 2 OS=Homo sapiens OX=9606 GN=PTPN2 PE=1 SV=2	1	1.06383	1.19048	ND	1.08477	0.0969511	0.117389
601	P15880	229	RS2_HUMAN 40S ribosomal protein S2 OS=Homo sapiens OX=9606 GN=RPS2 PE=1 SV=2	ND	1.07945	1.00889	1.16345	1.08393	0.0773773	0.116272
602	Q13454	123	TUSC3_HUMAN Tumor suppressor candidate 3 OS=Homo sapiens OX=9606 GN=TUSC3 PE=1 SV=1	1.11111	ND	1.15003	0.9901	1.08375	0.0834024	0.116028
603	Q9Y312	181	AAR2_HUMAN Protein AAR2 homolog OS=Homo sapiens OX=9606 GN=AAR2 PE=1 SV=2	1.11111	1.08696	1.05263	ND	1.08357	0.0293873	0.115788
604	Q9UPY8	182	MARE3_HUMAN Microtubule-associated protein RP/EB family member 3 OS=Homo sapiens OX=9606 GN=MAPRE3 PE=1 SV=1	1.04767	1.08228	1.06855	1.13519	1.08342	0.0373301	0.115596
605	Q8NCD3	646	HJURP_HUMAN Holliday junction recognition protein OS=Homo sapiens OX=9606 GN=HJURP PE=1 SV=2	ND	1.06026	1.05263	1.13636	1.08308	0.0462964	0.115144
606	Q9H974	312	QTRT2_HUMAN Queuine tRNA-ribosyltransferase accessory subunit 2 OS=Homo sapiens OX=9606 GN=QTRT2 PE=1 SV=1	ND	1.04167	ND	1.1236	1.08264	0.0579333	0.114547
607	Q14192	150	FHL2_HUMAN Four and a half LIM domains protein 2 OS=Homo sapiens OX=9606 GN=FHL2 PE=1 SV=3	ND	1.05263	1.06772	1.12684	1.0824	0.0392216	0.114229
608	Q9UJY4	343	GGA2_HUMAN ADP-ribosylation factor-binding protein GGA2 OS=Homo sapiens OX=9606 GN=GGA2 PE=1 SV=3	ND	1.03093	1.20482	1.0101	1.08195	0.106917	0.113634
609	O75044	486	SRGP2_HUMAN SLIT-ROBO Rho GTPase-activating protein 2 OS=Homo sapiens OX=9606 GN=SRGAP2 PE=1 SV=3	ND	1.11111	1.05275	ND	1.08193	0.0412668	0.113607
610	Q7Z6M4	69	MTEF4_HUMAN Transcription termination factor 4, mitochondrial OS=Homo sapiens OX=9606 GN=MTERF4 PE=1 SV=3	ND	1.05263	1.11111	ND	1.08187	0.0413516	0.113527
611	Q9ULA0	144	DNPEP_HUMAN Aspartyl aminopeptidase OS=Homo sapiens OX=9606 GN=DNPEP PE=1 SV=1	1.11111	1.02034	1.11366	1.08232	1.08186	0.043404	0.11351
612	Q9NX05	1056	F120C_HUMAN Constitutive coactivator of PPAR-gamma-like protein 2 OS=Homo sapiens OX=9606 GN=FAM120C PE=1 SV=3	0.98039	1.0989	1.11111	1.13636	1.08169	0.0693114	0.113287
613	Q86WR0	83	CCD25_HUMAN Coiled-coil domain-containing protein 25 OS=Homo sapiens OX=9606 GN=CCDC25 PE=1 SV=2	1.0865	1.25	0.9901	1	1.08165	0.120296	0.113234
614	S4R3N1	170	S4R3N1_HUMAN HSPE1-MOB4 readthrough OS=Homo sapiens OX=9606 GN=HSPE1-MOB4 PE=3 SV=1	1.11111	1.07577	1.05263	1.08696	1.08162	0.0243092	0.11319
615	Q9P0K7	468	RAI14_HUMAN Ankycorbin OS=Homo sapiens OX=9606 GN=RAI14 PE=1 SV=2	ND	1.16279	ND	1	1.0814	0.11511	0.112894
616	Q6DKJ4	205	NXN_HUMAN Nucleoredoxin OS=Homo sapiens OX=9606 GN=NXN PE=1 SV=2	1.0989	ND	1.06383	ND	1.08136	0.0247982	0.112854
617	Q68CZ2	615	TENS3_HUMAN Tensin-3 OS=Homo sapiens OX=9606 GN=TNS3 PE=1 SV=2	1.05906	1.0989	1.05543	1.11111	1.08113	0.0280603	0.112533
618	Q00577	272	PURA_HUMAN Transcriptional activator protein Pur-alpha OS=Homo sapiens OX=9606 GN=PURA PE=1 SV=2	ND	1.0989	1.03115	1.11111	1.08039	0.043075	0.111548
619	P50416	96	CPT1A_HUMAN Carnitine O-palmitoyltransferase 1, liver isoform OS=Homo sapiens OX=9606 GN=CPT1A PE=1 SV=2	ND	ND	1.2987	0.86207	1.08038	0.308744	0.111546
620	A0A024R358	28	A0A024R358_HUMAN HCG2000301, isoform CRA_a OS=Homo sapiens OX=9606 GN=hCG_2000301 PE=4 SV=1	1.05847	1.04592	1.13636	ND	1.08025	0.0489962	0.111365
621	Q9Y6B7	534	AP4B1_HUMAN AP-4 complex subunit beta-1 OS=Homo sapiens OX=9606 GN=AP4B1 PE=1 SV=2	1.1236	1.05263	ND	1.06383	1.08002	0.0381546	0.111058
622	P48651	4	PTSS1_HUMAN Phosphatidylserine synthase 1 OS=Homo sapiens OX=9606 GN=PTDSS1 PE=1 SV=1	ND	1.11845	1.23834	0.88226	1.07968	0.181178	0.110608
623	Q9NY27	22	PP4R2_HUMAN Serine/threonine-protein phosphatase 4 regulatory subunit 2 OS=Homo sapiens OX=9606 GN=PPP4R2 PE=1 SV=3	0.97087	1.06453	ND	1.20109	1.07883	0.115774	0.109468
624	H3BPE1	4820	H3BPE1_HUMAN Microtubule-actin cross-linking factor 1, isoforms 1/2/3/5 OS=Homo sapiens OX=9606 GN=MACF1 PE=1 SV=1	ND	ND	1.20482	0.95238	1.0786	0.178502	0.10916
625	Q9ULV4	420	COR1C_HUMAN Coronin-1C OS=Homo sapiens OX=9606 GN=CORO1C PE=1 SV=1	1.22926	1.00905	1.01781	1.05669	1.0782	0.102811	0.108628
626	A0A0A0MTC1	1663	A0A0A0MTC1_HUMAN E3 ubiquitin-protein ligase RNF213 OS=Homo sapiens OX=9606 GN=RNF213 PE=1 SV=1	ND	0.9992	1.00043	1.23457	1.07807	0.135537	0.108446
627	Q5QJE6	618	TDIF2_HUMAN Deoxynucleotidyltransferase terminal-interacting protein 2 OS=Homo sapiens OX=9606 GN=DNTTIP2 PE=1 SV=2	ND	0.88972	ND	1.26582	1.07777	0.265943	0.108049
628	P00352	303	AL1A1_HUMAN Retinal dehydrogenase 1 OS=Homo sapiens OX=9606 GN=ALDH1A1 PE=1 SV=2	1.07891	1.09643	1.08692	1.04784	1.07753	0.0210458	0.107721	Active site	Note=Nucleophile;Ontology_term=ECO:0000255,ECO:0000255,ECO:0000269;evidence=ECO:0000255|PROSITE-ProRule:PRU10007,ECO:0000255|PROSITE-ProRule:PRU10008,ECO:0000269|PubMed:3676276;Dbxref=PMID:3676276
629	Q6R327	1631	RICTR_HUMAN Rapamycin-insensitive companion of mTOR OS=Homo sapiens OX=9606 GN=RICTOR PE=1 SV=1	ND	1.17392	0.98039	ND	1.07716	0.136846	0.107226
630	P55786	339	PSA_HUMAN Puromycin-sensitive aminopeptidase OS=Homo sapiens OX=9606 GN=NPEPPS PE=1 SV=2	1.08111	1.06354	1.07601	1.08716	1.07695	0.0100376	0.106958
631	A3KMH1	416	VWA8_HUMAN von Willebrand factor A domain-containing protein 8 OS=Homo sapiens OX=9606 GN=VWA8 PE=1 SV=2	ND	1.04167	1.05263	1.13636	1.07689	0.0517961	0.106866
632	Q7Z5J4	899	RAI1_HUMAN Retinoic acid-induced protein 1 OS=Homo sapiens OX=9606 GN=RAI1 PE=1 SV=2	1.5625	0.89286	0.93458	0.91743	1.07684	0.324224	0.106807
633	O60264	165	SMCA5_HUMAN SWI/SNF-related matrix-associated actin-dependent regulator of chromatin subfamily A member 5 OS=Homo sapiens OX=9606 GN=SMARCA5 PE=1 SV=1	ND	ND	1.1329	1.02041	1.07666	0.0795424	0.106556
634	Q8N511	124	TM199_HUMAN Transmembrane protein 199 OS=Homo sapiens OX=9606 GN=TMEM199 PE=1 SV=1	ND	1.04167	ND	1.11111	1.07639	0.0491015	0.106201
635	Q7Z5J4	40	RAI1_HUMAN Retinoic acid-induced protein 1 OS=Homo sapiens OX=9606 GN=RAI1 PE=1 SV=2	ND	1.07527	1.16279	0.9901	1.07605	0.0863477	0.10575
636	Q9UHR5	127	S30BP_HUMAN SAP30-binding protein OS=Homo sapiens OX=9606 GN=SAP30BP PE=1 SV=1	ND	1.0989	ND	1.05263	1.07577	0.0327178	0.105363
637	Q8TD19	878	NEK9_HUMAN Serine/threonine-protein kinase Nek9 OS=Homo sapiens OX=9606 GN=NEK9 PE=1 SV=2	1.1089	1.06846	1.04458	1.07982	1.07544	0.0267072	0.104927
638	Q9H9A6	438	LRC40_HUMAN Leucine-rich repeat-containing protein 40 OS=Homo sapiens OX=9606 GN=LRRC40 PE=1 SV=1	ND	1.08696	ND	1.06383	1.07539	0.0163554	0.104867
639	A0A0A0MTP6	23	A0A0A0MTP6_HUMAN Phosphatidylinositol 3,4,5-trisphosphate 5-phosphatase 2 OS=Homo sapiens OX=9606 GN=INPPL1 PE=1 SV=1	1.07527	ND	ND	ND	1.07527		0.104699
640	P07737	128	PROF1_HUMAN Profilin-1 OS=Homo sapiens OX=9606 GN=PFN1 PE=1 SV=2	ND	1.07527	ND	ND	1.07527		0.104699
641	P0DN79	15	CBSL_HUMAN Cystathionine beta-synthase-like protein OS=Homo sapiens OX=9606 GN=CBSL PE=1 SV=1	ND	1.07527	ND	ND	1.07527		0.104699
642	P42704	863	LPPRC_HUMAN Leucine-rich PPR motif-containing protein, mitochondrial OS=Homo sapiens OX=9606 GN=LRPPRC PE=1 SV=3	ND	ND	ND	1.07527	1.07527		0.104699
643	P84103	10	SRSF3_HUMAN Serine/arginine-rich splicing factor 3 OS=Homo sapiens OX=9606 GN=SRSF3 PE=1 SV=1	ND	ND	ND	1.07527	1.07527		0.104699
644	Q13642	71	FHL1_HUMAN Four and a half LIM domains protein 1 OS=Homo sapiens OX=9606 GN=FHL1 PE=1 SV=4	1.07527	ND	ND	ND	1.07527		0.104699
645	Q2KHS0	70	Q2KHS0_HUMAN Hypothetical LOC440261 OS=Homo sapiens OX=9606 GN=MGC131512 PE=2 SV=1	1.07527	ND	ND	ND	1.07527		0.104699
646	Q2VPK5	449	CTU2_HUMAN Cytoplasmic tRNA 2-thiolation protein 2 OS=Homo sapiens OX=9606 GN=CTU2 PE=1 SV=1	ND	1.07527	ND	ND	1.07527		0.104699
647	Q5JU85	581	IQEC2_HUMAN IQ motif and SEC7 domain-containing protein 2 OS=Homo sapiens OX=9606 GN=IQSEC2 PE=1 SV=2	ND	ND	1.07527	1.07527	1.07527	0	0.104699
648	Q8IWE4	66	DCNL3_HUMAN DCN1-like protein 3 OS=Homo sapiens OX=9606 GN=DCUN1D3 PE=1 SV=1	ND	ND	ND	1.07527	1.07527		0.104699
649	Q8WYP5	1261	ELYS_HUMAN Protein ELYS OS=Homo sapiens OX=9606 GN=AHCTF1 PE=1 SV=3	ND	ND	1.07527	ND	1.07527		0.104699
650	Q96T52	35	IMP2L_HUMAN Mitochondrial inner membrane protease subunit 2 OS=Homo sapiens OX=9606 GN=IMMP2L PE=2 SV=1	ND	ND	ND	1.07527	1.07527		0.104699
651	Q9BVS5	143	TR61B_HUMAN tRNA (adenine(58)-N(1))-methyltransferase, mitochondrial OS=Homo sapiens OX=9606 GN=TRMT61B PE=1 SV=2	ND	ND	1.07527	ND	1.07527		0.104699
652	Q9NU22	1332	MDN1_HUMAN Midasin OS=Homo sapiens OX=9606 GN=MDN1 PE=1 SV=2	ND	1.07527	ND	ND	1.07527		0.104699
653	Q99757	90	THIOM_HUMAN Thioredoxin, mitochondrial OS=Homo sapiens OX=9606 GN=TXN2 PE=1 SV=2	1.08994	1.08708	1.08708	1.03686	1.07524	0.0256222	0.104659	Active site&Disulfide bond	Note=Nucleophile;Ontology_term=ECO:0000250;evidence=ECO:0000250$Note=Redox-active
654	Q5VZ89	1086	DEN4C_HUMAN DENN domain-containing protein 4C OS=Homo sapiens OX=9606 GN=DENND4C PE=1 SV=3	ND	1.02041	1.06383	1.14087	1.07504	0.0610069	0.104386
655	Q9HAV4	44	XPO5_HUMAN Exportin-5 OS=Homo sapiens OX=9606 GN=XPO5 PE=1 SV=1	1.17908	0.97087	ND	ND	1.07498	0.147227	0.104303
656	Q9Y2F5	265	ICE1_HUMAN Little elongation complex subunit 1 OS=Homo sapiens OX=9606 GN=ICE1 PE=1 SV=5	ND	ND	1.14943	1	1.07471	0.105663	0.103954
657	Q8IWW6	281	RHG12_HUMAN Rho GTPase-activating protein 12 OS=Homo sapiens OX=9606 GN=ARHGAP12 PE=1 SV=1	ND	1.0101	1.06383	1.14943	1.07445	0.0702699	0.103603
658	Q16513	131	PKN2_HUMAN Serine/threonine-protein kinase N2 OS=Homo sapiens OX=9606 GN=PKN2 PE=1 SV=1	1.0101	1.07527	1.1236	1.08696	1.07398	0.0473038	0.10297
659	Q8NDX6	50	ZN740_HUMAN Zinc finger protein 740 OS=Homo sapiens OX=9606 GN=ZNF740 PE=1 SV=1	ND	1.16323	1.0101	1.04784	1.07372	0.0797788	0.102622
660	Q06330	313	SUH_HUMAN Recombining binding protein suppressor of hairless OS=Homo sapiens OX=9606 GN=RBPJ PE=1 SV=3	1.13636	1.05263	1.03093	ND	1.07331	0.0556733	0.102062
661	Q9NQT8	1529	KI13B_HUMAN Kinesin-like protein KIF13B OS=Homo sapiens OX=9606 GN=KIF13B PE=1 SV=2	ND	ND	1.0989	1.04766	1.07328	0.0362322	0.102026
662	P46821	2088	MAP1B_HUMAN Microtubule-associated protein 1B OS=Homo sapiens OX=9606 GN=MAP1B PE=1 SV=2	1.35258	0.79365	ND	ND	1.07312	0.395223	0.101805
663	Q9Y277	229	VDAC3_HUMAN Voltage-dependent anion-selective channel protein 3 OS=Homo sapiens OX=9606 GN=VDAC3 PE=1 SV=1	1.08477	1.07975	1.07071	1.05631	1.07289	0.0124879	0.101495
664	Q05086	83	UBE3A_HUMAN Ubiquitin-protein ligase E3A OS=Homo sapiens OX=9606 GN=UBE3A PE=1 SV=4	0.96154	1.06423	1.02978	1.23457	1.07253	0.11615	0.101018
665	P55265	622	DSRAD_HUMAN Double-stranded RNA-specific adenosine deaminase OS=Homo sapiens OX=9606 GN=ADAR PE=1 SV=4	ND	1.05263	1.09094	ND	1.07178	0.0270893	0.100016
666	Q8TEX9	708	IPO4_HUMAN Importin-4 OS=Homo sapiens OX=9606 GN=IPO4 PE=1 SV=2	1.07527	1.06383	1.07527	ND	1.07146	0.00660489	0.0995735
667	Q9C0A1	1482	ZFHX2_HUMAN Zinc finger homeobox protein 2 OS=Homo sapiens OX=9606 GN=ZFHX2 PE=2 SV=3	ND	0.79365	0.97087	1.44928	1.07127	0.339149	0.0993176
668	Q9NP61	312	ARFG3_HUMAN ADP-ribosylation factor GTPase-activating protein 3 OS=Homo sapiens OX=9606 GN=ARFGAP3 PE=1 SV=1	ND	1.14088	1.06279	1.00999	1.07122	0.0658509	0.0992548
669	Q96I24	460	FUBP3_HUMAN Far upstream element-binding protein 3 OS=Homo sapiens OX=9606 GN=FUBP3 PE=1 SV=2	1.16279	0.96154	1.04898	1.11111	1.0711	0.0866036	0.0990999
670	Q9BRX8	85	F213A_HUMAN Redox-regulatory protein FAM213A OS=Homo sapiens OX=9606 GN=FAM213A PE=1 SV=3	1.0459	1.0226	1.12313	1.09162	1.07081	0.0451485	0.0987059	Active site&Mutagenesis	Note=Redox-active;Ontology_term=ECO:0000250;evidence=ECO:0000250$Note=Decrease of about 38%25 in antioxidant activity in TNFSF11-stimulated osteoclasts and reduced inhibition of TNFSF11-induced osteoclast formation. Does not change anti-inflammatory properties. C->G;Ontology_term=ECO:0000269,ECO:0000269;evidence=ECO:0000269|PubMed:19951071,ECO:0000269|PubMed:26438880;Dbxref=PMID:19951071,PMID:264…
671	O95793	574	STAU1_HUMAN Double-stranded RNA-binding protein Staufen homolog 1 OS=Homo sapiens OX=9606 GN=STAU1 PE=1 SV=2	1.01967	1.02041	1.20482	1.0367	1.0704	0.0899573	0.09815
672	Q9H8M7	27	MINY3_HUMAN Ubiquitin carboxyl-terminal hydrolase MINDY-3 OS=Homo sapiens OX=9606 GN=MINDY3 PE=1 SV=1	ND	1.0989	ND	1.04167	1.07029	0.0404677	0.097995
673	Q9UKX7	333	NUP50_HUMAN Nuclear pore complex protein Nup50 OS=Homo sapiens OX=9606 GN=NUP50 PE=1 SV=2	1.03093	ND	ND	1.10832	1.06962	0.054723	0.0971051
674	B4E300	582	B4E300_HUMAN cDNA FLJ52397, highly similar to ATP-dependent RNA helicase DDX24 (EC 3.6.1.-) OS=Homo sapiens OX=9606 PE=2 SV=1	1.05263	1.14943	1.00723	1.06912	1.0696	0.0593045	0.0970747
675	P49915	523	GUAA_HUMAN GMP synthase [glutamine-hydrolyzing] OS=Homo sapiens OX=9606 GN=GMPS PE=1 SV=1	ND	ND	1.06383	1.07527	1.06955	0.0080893	0.0970039
676	Q4G0N4	58	NAKD2_HUMAN NAD kinase 2, mitochondrial OS=Homo sapiens OX=9606 GN=NADK2 PE=1 SV=2	ND	1.07527	1.06383	ND	1.06955	0.0080893	0.0970039
677	Q6P158	1369	DHX57_HUMAN Putative ATP-dependent RNA helicase DHX57 OS=Homo sapiens OX=9606 GN=DHX57 PE=1 SV=2	1.06818	1.07241	ND	1.0673	1.0693	0.00273189	0.0966622
678	Q7Z401	1137	MYCPP_HUMAN C-myc promoter-binding protein OS=Homo sapiens OX=9606 GN=DENND4A PE=1 SV=2	ND	1.11735	1.02041	ND	1.06888	0.0685469	0.0960999
679	P10620	50	MGST1_HUMAN Microsomal glutathione S-transferase 1 OS=Homo sapiens OX=9606 GN=MGST1 PE=1 SV=1	ND	1.1544	1.10339	0.94741	1.0684	0.10784	0.0954519	Site	Note=Activates the enzyme when modified;Ontology_term=ECO:0000250;evidence=ECO:0000250
680	Q8WXH0	553	SYNE2_HUMAN Nesprin-2 OS=Homo sapiens OX=9606 GN=SYNE2 PE=1 SV=3	1.11111	1.02041	1.11111	1.03093	1.06839	0.0495154	0.0954384
681	P26358	896	DNMT1_HUMAN DNA (cytosine-5)-methyltransferase 1 OS=Homo sapiens OX=9606 GN=DNMT1 PE=1 SV=2	ND	0.8547	ND	1.28205	1.06838	0.302182	0.0954181
682	A0A2P9AGY3	21	A0A2P9AGY3_HUMAN Cpn10 chaperonin GroES, small subunit of GroESL (Modular protein) OS=Homo sapiens OX=9606 GN=BQ8482_140021 PE=3 SV=1	1.0101	1.07527	1.0989	1.08696	1.06781	0.0396628	0.0946516
683	P16455	145	MGMT_HUMAN Methylated-DNA--protein-cysteine methyltransferase OS=Homo sapiens OX=9606 GN=MGMT PE=1 SV=1	1.06213	1.06415	1.05823	1.08462	1.06728	0.0118166	0.0939421	Active site&Mutagenesis	Note=Nucleophile%3B methyl group acceptor$Note=Loss of DNA repair activity. C->A;Ontology_term=ECO:0000269,ECO:0000269;evidence=ECO:0000269|PubMed:10747039,ECO:0000269|PubMed:7766621;Dbxref=PMID:10747039,PMID:7766621
684	P47712	726	PA24A_HUMAN Cytosolic phospholipase A2 OS=Homo sapiens OX=9606 GN=PLA2G4A PE=1 SV=2	1.10501	1.13432	0.97357	1.05221	1.06628	0.0705279	0.092583	Mutagenesis	Note=No effect on phospholipase activity. C->A;Ontology_term=ECO:0000269;evidence=ECO:0000269|PubMed:8083230;Dbxref=PMID:8083230
685	Q9BSJ5	228	CQ080_HUMAN Uncharacterized protein C17orf80 OS=Homo sapiens OX=9606 GN=C17orf80 PE=2 SV=2	1.1236	0.8547	1.21951	ND	1.06594	0.189117	0.0921217
686	Q9NUQ3	160	TXLNG_HUMAN Gamma-taxilin OS=Homo sapiens OX=9606 GN=TXLNG PE=1 SV=2	ND	1.11111	ND	1.02041	1.06576	0.0641346	0.0918826
687	Q8TDN6	52	BRX1_HUMAN Ribosome biogenesis protein BRX1 homolog OS=Homo sapiens OX=9606 GN=BRIX1 PE=1 SV=2	1.05725	1.06678	1.07047	1.06747	1.06549	0.00572371	0.0915204
688	Q14008	1113	CKAP5_HUMAN Cytoskeleton-associated protein 5 OS=Homo sapiens OX=9606 GN=CKAP5 PE=1 SV=3	1.05263	ND	1.16279	0.98039	1.06527	0.0918546	0.0912191
689	A0A0U1RRE5	28	NBDY_HUMAN Negative regulator of P-body association OS=Homo sapiens OX=9606 GN=NBDY PE=1 SV=1	1.0101	1.11111	1.05263	1.08696	1.0652	0.0438757	0.0911243	Mutagenesis	Note=No effect on interaction with EDC4. C->A;Ontology_term=ECO:0000269;evidence=ECO:0000269|PubMed:27918561;Dbxref=PMID:27918561
690	P15924	1069	DESP_HUMAN Desmoplakin OS=Homo sapiens OX=9606 GN=DSP PE=1 SV=3	ND	1.05263	1.11111	1.03093	1.06489	0.0414721	0.0907044
691	P61247	111	RS3A_HUMAN 40S ribosomal protein S3a OS=Homo sapiens OX=9606 GN=RPS3A PE=1 SV=2	1.06838	1.02822	1.09921	1.06161	1.06435	0.0291224	0.0899794
692	O15213	172	WDR46_HUMAN WD repeat-containing protein 46 OS=Homo sapiens OX=9606 GN=WDR46 PE=1 SV=3	ND	ND	ND	1.06383	1.06383		0.0892676
693	O15355	13	PPM1G_HUMAN Protein phosphatase 1G OS=Homo sapiens OX=9606 GN=PPM1G PE=1 SV=1	ND	ND	1.06383	ND	1.06383		0.0892676
694	Q5T5P2	1556	SKT_HUMAN Sickle tail protein homolog OS=Homo sapiens OX=9606 GN=KIAA1217 PE=1 SV=2	ND	ND	1.06383	ND	1.06383		0.0892676
695	Q9ULT8	1944	HECD1_HUMAN E3 ubiquitin-protein ligase HECTD1 OS=Homo sapiens OX=9606 GN=HECTD1 PE=1 SV=3	ND	ND	0.9901	1.13636	1.06323	0.103421	0.0884537
696	O60232	125	SSA27_HUMAN Sjoegren syndrome/scleroderma autoantigen 1 OS=Homo sapiens OX=9606 GN=SSSCA1 PE=1 SV=1	1.07527	0.94433	1.1236	1.10642	1.06241	0.0812186	0.0873338
697	Q8TAQ2	145	SMRC2_HUMAN SWI/SNF complex subunit SMARCC2 OS=Homo sapiens OX=9606 GN=SMARCC2 PE=1 SV=1	0.8547	1.129	1.24851	1.01718	1.06235	0.167587	0.0872558
698	Q8NDX6	182	ZN740_HUMAN Zinc finger protein 740 OS=Homo sapiens OX=9606 GN=ZNF740 PE=1 SV=1	ND	ND	1.06227	ND	1.06227		0.0871505
699	P50613	305	CDK7_HUMAN Cyclin-dependent kinase 7 OS=Homo sapiens OX=9606 GN=CDK7 PE=1 SV=1	ND	1.16279	0.96154	ND	1.06217	0.142305	0.0870079
700	A0MZ66	550	SHOT1_HUMAN Shootin-1 OS=Homo sapiens OX=9606 GN=SHTN1 PE=1 SV=4	ND	1.06049	1.05564	1.06955	1.06189	0.00706038	0.0866389
701	P05023	464	AT1A1_HUMAN Sodium/potassium-transporting ATPase subunit alpha-1 OS=Homo sapiens OX=9606 GN=ATP1A1 PE=1 SV=1	ND	1.1236	ND	1	1.0618	0.0873984	0.086512
702	Q3KR37	65	GRM1B_HUMAN GRAM domain-containing protein 1B OS=Homo sapiens OX=9606 GN=GRAMD1B PE=1 SV=1	1.2987	1.33333	0.81967	0.79365	1.06134	0.294607	0.0858835
703	O95453	169	PARN_HUMAN Poly(A)-specific ribonuclease PARN OS=Homo sapiens OX=9606 GN=PARN PE=1 SV=1	0.99521	1.03093	1.12985	1.08811	1.06102	0.0597433	0.0854586
704	Q9UPN3	4825	MACF1_HUMAN Microtubule-actin cross-linking factor 1, isoforms 1/2/3/5 OS=Homo sapiens OX=9606 GN=MACF1 PE=1 SV=4	1.01588	1.10568	ND	ND	1.06078	0.0634982	0.0851255
705	Q14980	961	NUMA1_HUMAN Nuclear mitotic apparatus protein 1 OS=Homo sapiens OX=9606 GN=NUMA1 PE=1 SV=2	1.04715	1.09894	0.98826	1.10859	1.06073	0.0553381	0.0850643
706	Q15154	1717	PCM1_HUMAN Pericentriolar material 1 protein OS=Homo sapiens OX=9606 GN=PCM1 PE=1 SV=5	ND	1.06383	1.05759	ND	1.06071	0.00441235	0.0850303
707	Q9NQT4	26	EXOS5_HUMAN Exosome complex component RRP46 OS=Homo sapiens OX=9606 GN=EXOSC5 PE=1 SV=1	1.19048	1	1.14289	0.90909	1.06061	0.129445	0.0849011
708	Q562E7	215	WDR81_HUMAN WD repeat-containing protein 81 OS=Homo sapiens OX=9606 GN=WDR81 PE=1 SV=2	ND	1.17647	0.95238	1.05263	1.06049	0.112252	0.0847356
709	Q7Z6Z7	1832	HUWE1_HUMAN E3 ubiquitin-protein ligase HUWE1 OS=Homo sapiens OX=9606 GN=HUWE1 PE=1 SV=3	0.98915	1.14943	0.95238	1.15003	1.06025	0.104411	0.0844011
710	P15121	304	ALDR_HUMAN Aldose reductase OS=Homo sapiens OX=9606 GN=AKR1B1 PE=1 SV=3	1.05355	0.98693	1.11111	1.08915	1.06019	0.0542913	0.084316
711	Q02543	16	RL18A_HUMAN 60S ribosomal protein L18a OS=Homo sapiens OX=9606 GN=RPL18A PE=1 SV=2	1.05286	1.05362	1.0655	1.0664	1.05959	0.00735386	0.0835129
712	P62826	112	RAN_HUMAN GTP-binding nuclear protein Ran OS=Homo sapiens OX=9606 GN=RAN PE=1 SV=3	1.14943	0.96801	ND	ND	1.05872	0.128283	0.0823211
713	Q5TAQ9	272	DCAF8_HUMAN DDB1- and CUL4-associated factor 8 OS=Homo sapiens OX=9606 GN=DCAF8 PE=1 SV=1	ND	1.07527	1.04167	ND	1.05847	0.0237588	0.0819804
714	Q8N8R5	230	CB069_HUMAN UPF0565 protein C2orf69 OS=Homo sapiens OX=9606 GN=C2orf69 PE=1 SV=1	ND	1.07527	1.04167	ND	1.05847	0.0237588	0.0819804
715	Q9Y586	250	MB212_HUMAN Protein mab-21-like 2 OS=Homo sapiens OX=9606 GN=MAB21L2 PE=1 SV=1	1.02041	1.08708	1.07527	1.04715	1.05748	0.0298526	0.080627
716	P28290	703	SSFA2_HUMAN Sperm-specific antigen 2 OS=Homo sapiens OX=9606 GN=SSFA2 PE=1 SV=3	0.9434	1.08696	1.16734	1.03093	1.05716	0.0942639	0.0801903
717	Q9ULD2	735	MTUS1_HUMAN Microtubule-associated tumor suppressor 1 OS=Homo sapiens OX=9606 GN=MTUS1 PE=1 SV=2	ND	1.14809	1.02321	1	1.0571	0.0796496	0.0801119
718	Q7RTP8	110	Q7RTP8_HUMAN Kinesin light chain 1J OS=Homo sapiens OX=9606 GN=KNS2 PE=2 SV=1	ND	ND	ND	1.05652	1.05652		0.0793201
719	Q92685	21	ALG3_HUMAN Dol-P-Man:Man(5)GlcNAc(2)-PP-Dol alpha-1,3-mannosyltransferase OS=Homo sapiens OX=9606 GN=ALG3 PE=1 SV=1	ND	1.25	0.8547	1.06383	1.05618	0.197761	0.0788512
720	P48507	35	GSH0_HUMAN Glutamate--cysteine ligase regulatory subunit OS=Homo sapiens OX=9606 GN=GCLM PE=1 SV=1	1.05263	1.04628	1.07028	1.05497	1.05604	0.0101785	0.0786645
721	P13010	339	XRCC5_HUMAN X-ray repair cross-complementing protein 5 OS=Homo sapiens OX=9606 GN=XRCC5 PE=1 SV=3	1.23457	0.87719	ND	ND	1.05588	0.252706	0.0784459
722	Q2VPK5	444	CTU2_HUMAN Cytoplasmic tRNA 2-thiolation protein 2 OS=Homo sapiens OX=9606 GN=CTU2 PE=1 SV=1	ND	1	1.11111	ND	1.05556	0.0785666	0.0780018
723	Q86TB9	563	PATL1_HUMAN Protein PAT1 homolog 1 OS=Homo sapiens OX=9606 GN=PATL1 PE=1 SV=2	ND	0.96154	1.14943	ND	1.05549	0.132858	0.0779061
724	Q96DU7	434	IP3KC_HUMAN Inositol-trisphosphate 3-kinase C OS=Homo sapiens OX=9606 GN=ITPKC PE=1 SV=1	1.07527	1.06781	1.02041	ND	1.0545	0.0297546	0.0765545
725	Q9BYG3	269	MK67I_HUMAN MKI67 FHA domain-interacting nucleolar phosphoprotein OS=Homo sapiens OX=9606 GN=NIFK PE=1 SV=1	1.05263	1.0363	1.06383	1.06383	1.05415	0.0130171	0.0760767
726	Q92576	561	PHF3_HUMAN PHD finger protein 3 OS=Homo sapiens OX=9606 GN=PHF3 PE=1 SV=3	1.02041	ND	1.08696	ND	1.05368	0.047058	0.0754436
727	P46013	3241	KI67_HUMAN Proliferation marker protein Ki-67 OS=Homo sapiens OX=9606 GN=MKI67 PE=1 SV=2	1.00597	1.0101	1.19647	1.00219	1.05368	0.0952465	0.0754402
728	Q7L775	465	EPMIP_HUMAN EPM2A-interacting protein 1 OS=Homo sapiens OX=9606 GN=EPM2AIP1 PE=1 SV=1	ND	1.13636	0.97087	ND	1.05361	0.117019	0.0753478
729	P50336	26	PPOX_HUMAN Protoporphyrinogen oxidase OS=Homo sapiens OX=9606 GN=PPOX PE=1 SV=1	1.07535	1.02051	1.051	1.06732	1.05355	0.0242418	0.0752519
730	Q13148	50	TADBP_HUMAN TAR DNA-binding protein 43 OS=Homo sapiens OX=9606 GN=TARDBP PE=1 SV=1	1.04482	1.04587	1.0507	1.07252	1.05348	0.0129506	0.0751595
731	Q9H9J2	53	RM44_HUMAN 39S ribosomal protein L44, mitochondrial OS=Homo sapiens OX=9606 GN=MRPL44 PE=1 SV=1	1.09025	1.04823	0.88657	1.18795	1.05325	0.125593	0.0748479
732	P31749	296	AKT1_HUMAN RAC-alpha serine/threonine-protein kinase OS=Homo sapiens OX=9606 GN=AKT1 PE=1 SV=2	1.06576	1.01849	1.07527	ND	1.05317	0.0304107	0.0747429	Disulfide bond	Ontology_term=ECO:0000250;evidence=ECO:0000250
733	Q92616	1235	GCN1_HUMAN eIF-2-alpha kinase activator GCN1 OS=Homo sapiens OX=9606 GN=GCN1 PE=1 SV=6	ND	1.03093	1.07527	ND	1.0531	0.0313531	0.0746424
734	Q9Y5X3	347	SNX5_HUMAN Sorting nexin-5 OS=Homo sapiens OX=9606 GN=SNX5 PE=1 SV=1	ND	ND	1.03093	1.07527	1.0531	0.0313531	0.0746424
735	Q9Y2Z2	315	MTO1_HUMAN Protein MTO1 homolog, mitochondrial OS=Homo sapiens OX=9606 GN=MTO1 PE=1 SV=2	ND	0.72908	0.98039	1.44928	1.05292	0.365537	0.0743913
736	P19013	42	K2C4_HUMAN Keratin, type II cytoskeletal 4 OS=Homo sapiens OX=9606 GN=KRT4 PE=1 SV=4	ND	1.06395	1.06383	1.03093	1.0529	0.0190296	0.074373
737	Q14137	108	BOP1_HUMAN Ribosome biogenesis protein BOP1 OS=Homo sapiens OX=9606 GN=BOP1 PE=1 SV=2	1.15677	0.99494	1.00686	ND	1.05286	0.0901887	0.074309
738	O43824	394	GTPB6_HUMAN Putative GTP-binding protein 6 OS=Homo sapiens OX=9606 GN=GTPBP6 PE=2 SV=4	1.0101	1.06383	ND	1.08438	1.05277	0.0383552	0.0741903
739	Q9Y3C1	36	NOP16_HUMAN Nucleolar protein 16 OS=Homo sapiens OX=9606 GN=NOP16 PE=1 SV=2	ND	1.04167	1.0488	1.0675	1.05266	0.0133399	0.074035
740	A5YKK6	1932	CNOT1_HUMAN CCR4-NOT transcription complex subunit 1 OS=Homo sapiens OX=9606 GN=CNOT1 PE=1 SV=2	ND	1.05263	ND	ND	1.05263		0.0739984
741	O75688	172	PPM1B_HUMAN Protein phosphatase 1B OS=Homo sapiens OX=9606 GN=PPM1B PE=1 SV=1	ND	1.05263	ND	ND	1.05263		0.0739984
742	P17174	46	AATC_HUMAN Aspartate aminotransferase, cytoplasmic OS=Homo sapiens OX=9606 GN=GOT1 PE=1 SV=3	1.05263	ND	ND	ND	1.05263		0.0739984
743	P32780	506	TF2H1_HUMAN General transcription factor IIH subunit 1 OS=Homo sapiens OX=9606 GN=GTF2H1 PE=1 SV=1	ND	ND	ND	1.05263	1.05263		0.0739984
744	P47895	314	AL1A3_HUMAN Aldehyde dehydrogenase family 1 member A3 OS=Homo sapiens OX=9606 GN=ALDH1A3 PE=1 SV=2	ND	ND	1.05263	ND	1.05263		0.0739984	Active site	Note=Nucleophile;Ontology_term=ECO:0000255,ECO:0000255;evidence=ECO:0000255|PROSITE-ProRule:PRU10007,ECO:0000255|PROSITE-ProRule:PRU10008
745	P59923	898	ZN445_HUMAN Zinc finger protein 445 OS=Homo sapiens OX=9606 GN=ZNF445 PE=1 SV=1	1.05263	ND	ND	ND	1.05263		0.0739984
746	Q13574	897	DGKZ_HUMAN Diacylglycerol kinase zeta OS=Homo sapiens OX=9606 GN=DGKZ PE=1 SV=3	ND	ND	1.05263	ND	1.05263		0.0739984
747	Q562E7	207	WDR81_HUMAN WD repeat-containing protein 81 OS=Homo sapiens OX=9606 GN=WDR81 PE=1 SV=2	ND	ND	1.05263	ND	1.05263		0.0739984
748	Q59FD2	632	Q59FD2_HUMAN CTAGE family, member 5 isoform 1 variant (Fragment) OS=Homo sapiens OX=9606 PE=2 SV=1	1.05263	ND	ND	ND	1.05263		0.0739984
749	Q6ULP2	365	AFTIN_HUMAN Aftiphilin OS=Homo sapiens OX=9606 GN=AFTPH PE=1 SV=3	ND	1.05263	ND	ND	1.05263		0.0739984
750	Q7Z333	688	SETX_HUMAN Probable helicase senataxin OS=Homo sapiens OX=9606 GN=SETX PE=1 SV=4	ND	ND	ND	1.05263	1.05263		0.0739984
751	Q86XP1	721	DGKH_HUMAN Diacylglycerol kinase eta OS=Homo sapiens OX=9606 GN=DGKH PE=1 SV=1	ND	ND	1.05263	ND	1.05263		0.0739984
752	Q8NFF5	561	FAD1_HUMAN FAD synthase OS=Homo sapiens OX=9606 GN=FLAD1 PE=1 SV=1	ND	1.05263	ND	ND	1.05263		0.0739984
753	Q8WXH0	90	SYNE2_HUMAN Nesprin-2 OS=Homo sapiens OX=9606 GN=SYNE2 PE=1 SV=3	ND	ND	1.05263	ND	1.05263		0.0739984
754	Q96K58	126	ZN668_HUMAN Zinc finger protein 668 OS=Homo sapiens OX=9606 GN=ZNF668 PE=1 SV=3	ND	1.05263	ND	ND	1.05263		0.0739984
755	Q9NZN5	72	ARHGC_HUMAN Rho guanine nucleotide exchange factor 12 OS=Homo sapiens OX=9606 GN=ARHGEF12 PE=1 SV=1	ND	ND	1.05263	ND	1.05263		0.0739984
756	Q9UDY8	441	MALT1_HUMAN Mucosa-associated lymphoid tissue lymphoma translocation protein 1 OS=Homo sapiens OX=9606 GN=MALT1 PE=1 SV=1	ND	ND	ND	1.05263	1.05263		0.0739984
757	Q9C0F1	260	CEP44_HUMAN Centrosomal protein of 44 kDa OS=Homo sapiens OX=9606 GN=CEP44 PE=1 SV=2	ND	1.07527	0.86097	1.21951	1.05192	0.180407	0.0730204
758	Q9BY89	1341	K1671_HUMAN Uncharacterized protein KIAA1671 OS=Homo sapiens OX=9606 GN=KIAA1671 PE=1 SV=2	ND	ND	1.09371	1.0101	1.05191	0.0591212	0.0730044
759	P45974	195	UBP5_HUMAN Ubiquitin carboxyl-terminal hydrolase 5 OS=Homo sapiens OX=9606 GN=USP5 PE=1 SV=2	0.93947	1.04772	1.05651	1.1626	1.05158	0.0911652	0.0725517	Disulfide bond	Ontology_term=ECO:0000269;evidence=ECO:0000269|Ref.23
760	P27348	134	1433T_HUMAN 14-3-3 protein theta OS=Homo sapiens OX=9606 GN=YWHAQ PE=1 SV=1	1.09073	0.93059	1.02077	1.16392	1.0515	0.0995671	0.0724523
761	Q13144	196	EI2BE_HUMAN Translation initiation factor eIF-2B subunit epsilon OS=Homo sapiens OX=9606 GN=EIF2B5 PE=1 SV=3	1.11111	1.1236	0.9901	0.98039	1.0513	0.0765467	0.0721744
762	P46013	1007	KI67_HUMAN Proliferation marker protein Ki-67 OS=Homo sapiens OX=9606 GN=MKI67 PE=1 SV=2	0.84034	0.99334	1.37649	0.99391	1.05102	0.228696	0.0717901
763	Q96MH2	240	HEXI2_HUMAN Protein HEXIM2 OS=Homo sapiens OX=9606 GN=HEXIM2 PE=1 SV=1	ND	0.95238	0.93458	1.26582	1.05093	0.186316	0.071662
764	P17987	397	TCPA_HUMAN T-complex protein 1 subunit alpha OS=Homo sapiens OX=9606 GN=TCP1 PE=1 SV=1	ND	0.95238	ND	1.14943	1.0509	0.139335	0.0716323
765	O95817	151	BAG3_HUMAN BAG family molecular chaperone regulator 3 OS=Homo sapiens OX=9606 GN=BAG3 PE=1 SV=3	1.01371	0.91928	1.02041	1.25	1.05085	0.140567	0.0715568
766	P24752	196	THIL_HUMAN Acetyl-CoA acetyltransferase, mitochondrial OS=Homo sapiens OX=9606 GN=ACAT1 PE=1 SV=1	1.04182	1.06034	1.04673	1.05408	1.05074	0.00814375	0.0714092
767	Q13425	391	SNTB2_HUMAN Beta-2-syntrophin OS=Homo sapiens OX=9606 GN=SNTB2 PE=1 SV=1	1.0989	ND	ND	1.00251	1.05071	0.068158	0.0713577
768	Q96T76	794	MMS19_HUMAN MMS19 nucleotide excision repair protein homolog OS=Homo sapiens OX=9606 GN=MMS19 PE=1 SV=2	ND	ND	0.9901	1.11111	1.05061	0.085567	0.0712204
769	Q86WQ0	7	NR2CA_HUMAN Nuclear receptor 2C2-associated protein OS=Homo sapiens OX=9606 GN=NR2C2AP PE=1 SV=1	1.02041	1.04167	1.07527	1.06383	1.05029	0.0243204	0.0707946
770	Q9BRA2	43	TXD17_HUMAN Thioredoxin domain-containing protein 17 OS=Homo sapiens OX=9606 GN=TXNDC17 PE=1 SV=1	1.0062	1.00803	1.04077	1.14537	1.05009	0.065474	0.0705164	Active site&Disulfide bond&Mutagenesis	Note=Nucleophile;Ontology_term=ECO:0000269;evidence=ECO:0000269|PubMed:14607844;Dbxref=PMID:14607844$Note=Redox-active;Ontology_term=ECO:0000269;evidence=ECO:0000269|PubMed:15355959;Dbxref=PMID:15355959$Note=Loss of peroxidase activity. C->S;Ontology_term=ECO:0000269;evidence=ECO:0000269|PubMed:14607844;Dbxref=PMID:14607844
771	P20290	22	BTF3_HUMAN Transcription factor BTF3 OS=Homo sapiens OX=9606 GN=BTF3 PE=1 SV=1	ND	1.08592	1.07545	0.98812	1.04983	0.0536982	0.0701557
772	Q9NQW6	712	ANLN_HUMAN Anillin OS=Homo sapiens OX=9606 GN=ANLN PE=1 SV=2	1.0101	1.04592	1.03093	1.11111	1.04951	0.0436112	0.0697228
773	Q15464	215	SHB_HUMAN SH2 domain-containing adapter protein B OS=Homo sapiens OX=9606 GN=SHB PE=1 SV=2	ND	1.0989	1.01674	1.03268	1.04944	0.0435688	0.0696197
774	O15033	382	AREL1_HUMAN Apoptosis-resistant E3 ubiquitin protein ligase 1 OS=Homo sapiens OX=9606 GN=AREL1 PE=1 SV=3	1.03093	1.07527	ND	1.04167	1.04929	0.0231313	0.0694135
775	Q96F63	17	CCD97_HUMAN Coiled-coil domain-containing protein 97 OS=Homo sapiens OX=9606 GN=CCDC97 PE=1 SV=1	ND	0.98039	1.11722	ND	1.0488	0.0967534	0.0687465
776	O00264	129	PGRC1_HUMAN Membrane-associated progesterone receptor component 1 OS=Homo sapiens OX=9606 GN=PGRMC1 PE=1 SV=3	ND	1.0101	1.08696	ND	1.04853	0.0543482	0.0683681
777	Q9P206	804	K1522_HUMAN Uncharacterized protein KIAA1522 OS=Homo sapiens OX=9606 GN=KIAA1522 PE=1 SV=2	1.08696	1	1.07527	1.03093	1.04829	0.0402351	0.0680379
778	H0YD14	818	H0YD14_HUMAN Myoferlin (Fragment) OS=Homo sapiens OX=9606 GN=MYOF PE=1 SV=1	1	ND	1.09581	ND	1.04791	0.0677479	0.0675079
779	Q8IVT2	137	MISP_HUMAN Mitotic interactor and substrate of PLK1 OS=Homo sapiens OX=9606 GN=MISP PE=1 SV=1	1.08696	1.02041	ND	1.0363	1.04789	0.0347559	0.0674873
780	A6NKT7	1602	RGPD3_HUMAN RanBP2-like and GRIP domain-containing protein 3 OS=Homo sapiens OX=9606 GN=RGPD3 PE=3 SV=2	1.07527	ND	ND	1.02041	1.04784	0.0387919	0.0674184
781	P22681	508	CBL_HUMAN E3 ubiquitin-protein ligase CBL OS=Homo sapiens OX=9606 GN=CBL PE=1 SV=2	ND	0.99658	ND	1.0989	1.04774	0.0723512	0.0672808
782	P78371	535	TCPB_HUMAN T-complex protein 1 subunit beta OS=Homo sapiens OX=9606 GN=CCT2 PE=1 SV=4	ND	1.10501	1.01731	1.02041	1.04758	0.0497629	0.0670558
783	Q15365	109	PCBP1_HUMAN Poly(rC)-binding protein 1 OS=Homo sapiens OX=9606 GN=PCBP1 PE=1 SV=2	1.05337	1.04167	1.05263	1.0419	1.04739	0.00648271	0.0668022
784	Q92598	34	HS105_HUMAN Heat shock protein 105 kDa OS=Homo sapiens OX=9606 GN=HSPH1 PE=1 SV=1	1.02041	1.08111	1.0101	1.07527	1.04672	0.0366561	0.065879
785	Q96T51	320	RUFY1_HUMAN RUN and FYVE domain-containing protein 1 OS=Homo sapiens OX=9606 GN=RUFY1 PE=1 SV=2	ND	1.14943	0.9434	ND	1.04642	0.145685	0.0654551
786	Q7Z5J4	1553	RAI1_HUMAN Retinoic acid-induced protein 1 OS=Homo sapiens OX=9606 GN=RAI1 PE=1 SV=2	1.04167	1.0101	ND	1.08696	1.04624	0.0386336	0.0652184
787	O75410	467	TACC1_HUMAN Transforming acidic coiled-coil-containing protein 1 OS=Homo sapiens OX=9606 GN=TACC1 PE=1 SV=2	1.08696	1.0101	ND	1.04167	1.04624	0.0386336	0.0652184
788	A0A0A0MTC1	1559	A0A0A0MTC1_HUMAN E3 ubiquitin-protein ligase RNF213 OS=Homo sapiens OX=9606 GN=RNF213 PE=1 SV=1	1.02336	1.06593	1.02341	1.07102	1.04593	0.0261155	0.0647863
789	Q66PJ3	220	AR6P4_HUMAN ADP-ribosylation factor-like protein 6-interacting protein 4 OS=Homo sapiens OX=9606 GN=ARL6IP4 PE=1 SV=2	1.04167	1.05263	ND	1.04348	1.04593	0.00587538	0.0647817
790	Q9NYH9	175	UTP6_HUMAN U3 small nucleolar RNA-associated protein 6 homolog OS=Homo sapiens OX=9606 GN=UTP6 PE=2 SV=2	ND	1.13636	1.02041	0.98039	1.04572	0.0810068	0.0644966
791	Q9NVU0	456	RPC5_HUMAN DNA-directed RNA polymerase III subunit RPC5 OS=Homo sapiens OX=9606 GN=POLR3E PE=1 SV=1	0.9009	1.03093	1.20482	ND	1.04555	0.152487	0.0642621
792	O00401	431	WASL_HUMAN Neural Wiskott-Aldrich syndrome protein OS=Homo sapiens OX=9606 GN=WASL PE=1 SV=2	1.05263	1.05335	1.04989	1.02588	1.04544	0.0131233	0.0641068
793	Q14015	12	Q14015_HUMAN PR371 c-K-ras oncogene (Fragment) OS=Homo sapiens OX=9606 PE=2 SV=1	ND	1.07527	1.01525	ND	1.04526	0.0424405	0.0638618
794	Q96EV2	726	RBM33_HUMAN RNA-binding protein 33 OS=Homo sapiens OX=9606 GN=RBM33 PE=1 SV=3	ND	1.04515	ND	ND	1.04515		0.06371
795	Q9ULD2	717	MTUS1_HUMAN Microtubule-associated tumor suppressor 1 OS=Homo sapiens OX=9606 GN=MTUS1 PE=1 SV=2	1.02749	1.00735	1.07028	1.07527	1.0451	0.0330627	0.0636375
796	Q29RF7	532	PDS5A_HUMAN Sister chromatid cohesion protein PDS5 homolog A OS=Homo sapiens OX=9606 GN=PDS5A PE=1 SV=1	1.14739	1.0352	0.95238	ND	1.04499	0.0978729	0.0634891
797	Q68CP9	711	ARID2_HUMAN AT-rich interactive domain-containing protein 2 OS=Homo sapiens OX=9606 GN=ARID2 PE=1 SV=2	1.11111	0.97087	ND	1.05263	1.04487	0.0704413	0.0633235
798	Q12986	32	NFX1_HUMAN Transcriptional repressor NF-X1 OS=Homo sapiens OX=9606 GN=NFX1 PE=1 SV=2	1.11111	1.05263	0.97087	ND	1.04487	0.0704413	0.0633235
799	Q29RF7	508	PDS5A_HUMAN Sister chromatid cohesion protein PDS5 homolog A OS=Homo sapiens OX=9606 GN=PDS5A PE=1 SV=1	1.03093	0.96154	1.0989	1.08696	1.04458	0.0627925	0.0629264
800	Q6IN84	182	MRM1_HUMAN rRNA methyltransferase 1, mitochondrial OS=Homo sapiens OX=9606 GN=MRM1 PE=1 SV=1	1.16279	ND	0.8331	1.13636	1.04408	0.183194	0.0622369
801	P26368	464	U2AF2_HUMAN Splicing factor U2AF 65 kDa subunit OS=Homo sapiens OX=9606 GN=U2AF2 PE=1 SV=4	ND	1	0.94065	1.19048	1.04371	0.130525	0.0617209
802	P35568	923	IRS1_HUMAN Insulin receptor substrate 1 OS=Homo sapiens OX=9606 GN=IRS1 PE=1 SV=1	1.04167	1.09241	1.04255	0.99803	1.04367	0.038574	0.0616587
803	O60443	180	GSDME_HUMAN Gasdermin-E OS=Homo sapiens OX=9606 GN=GSDME PE=1 SV=2	1.0989	ND	1.03093	1	1.04328	0.0505928	0.0611218
804	Q06124	318	PTN11_HUMAN Tyrosine-protein phosphatase non-receptor type 11 OS=Homo sapiens OX=9606 GN=PTPN11 PE=1 SV=2	1.08696	1.05275	1.04167	0.9901	1.04287	0.0401151	0.0605593
805	Q9NYL9	150	TMOD3_HUMAN Tropomodulin-3 OS=Homo sapiens OX=9606 GN=TMOD3 PE=1 SV=1	1.24371	0.89647	1.03093	1	1.04278	0.145774	0.0604314
806	Q9BW61	25	DDA1_HUMAN DET1- and DDB1-associated protein 1 OS=Homo sapiens OX=9606 GN=DDA1 PE=1 SV=1	ND	1.07527	1.0101	ND	1.04269	0.0460821	0.0603034
807	Q7Z6E9	1566	RBBP6_HUMAN E3 ubiquitin-protein ligase RBBP6 OS=Homo sapiens OX=9606 GN=RBBP6 PE=1 SV=1	ND	0.96154	1.1236	ND	1.04257	0.114594	0.0601443
808	P50613	312	CDK7_HUMAN Cyclin-dependent kinase 7 OS=Homo sapiens OX=9606 GN=CDK7 PE=1 SV=1	ND	0.87719	1	1.25	1.0424	0.189987	0.0599044
809	Q5T4S7	2222	UBR4_HUMAN E3 ubiquitin-protein ligase UBR4 OS=Homo sapiens OX=9606 GN=UBR4 PE=1 SV=1	ND	ND	0.93458	1.14943	1.04201	0.151922	0.0593622
810	Q9C0C2	136	TB182_HUMAN 182 kDa tankyrase-1-binding protein OS=Homo sapiens OX=9606 GN=TNKS1BP1 PE=1 SV=4	ND	1.04167	1.0419	1.04167	1.04175	0.000132791	0.0590045
811	B4DLN6	286	B4DLN6_HUMAN cDNA FLJ59033, highly similar to Protein disulfide-isomerase (EC 5.3.4.1) OS=Homo sapiens OX=9606 PE=2 SV=1	ND	1.04167	ND	ND	1.04167		0.0588983
812	B7Z2F5	202	B7Z2F5_HUMAN cDNA FLJ55918, highly similar to Echinoderm microtubule-associated protein-like 2 OS=Homo sapiens OX=9606 PE=2 SV=1	ND	ND	1.04167	ND	1.04167		0.0588983
813	O14647	1155	CHD2_HUMAN Chromodomain-helicase-DNA-binding protein 2 OS=Homo sapiens OX=9606 GN=CHD2 PE=1 SV=2	ND	1.04167	ND	ND	1.04167		0.0588983
814	O60885	356	BRD4_HUMAN Bromodomain-containing protein 4 OS=Homo sapiens OX=9606 GN=BRD4 PE=1 SV=2	ND	1.04167	ND	ND	1.04167		0.0588983
815	O75324	71	SNN_HUMAN Stannin OS=Homo sapiens OX=9606 GN=SNN PE=1 SV=1	ND	ND	1.04167	ND	1.04167		0.0588983
816	O75460	538	ERN1_HUMAN Serine/threonine-protein kinase/endoribonuclease IRE1 OS=Homo sapiens OX=9606 GN=ERN1 PE=1 SV=2	ND	1.04167	ND	ND	1.04167		0.0588983
817	P02795	50	MT2_HUMAN Metallothionein-2 OS=Homo sapiens OX=9606 GN=MT2A PE=1 SV=1	ND	1.04167	ND	ND	1.04167		0.0588983	Metal binding	Note=Divalent metal cation%3B cluster A
818	P14923	33	PLAK_HUMAN Junction plakoglobin OS=Homo sapiens OX=9606 GN=JUP PE=1 SV=3	1.04167	ND	ND	ND	1.04167		0.0588983
819	P14923	511	PLAK_HUMAN Junction plakoglobin OS=Homo sapiens OX=9606 GN=JUP PE=1 SV=3	1.04167	ND	ND	ND	1.04167		0.0588983
820	P50851	832	LRBA_HUMAN Lipopolysaccharide-responsive and beige-like anchor protein OS=Homo sapiens OX=9606 GN=LRBA PE=1 SV=4	ND	ND	1.04167	ND	1.04167		0.0588983
821	Q1KMD3	602	HNRL2_HUMAN Heterogeneous nuclear ribonucleoprotein U-like protein 2 OS=Homo sapiens OX=9606 GN=HNRNPUL2 PE=1 SV=1	ND	ND	ND	1.04167	1.04167		0.0588983
822	Q53H96	49	P5CR3_HUMAN Pyrroline-5-carboxylate reductase 3 OS=Homo sapiens OX=9606 GN=PYCR3 PE=1 SV=3	ND	ND	1.04167	ND	1.04167		0.0588983
823	Q59GM8	61	Q59GM8_HUMAN Phosphodiesterase (Fragment) OS=Homo sapiens OX=9606 PE=2 SV=1	ND	ND	1.04167	ND	1.04167		0.0588983
824	Q5T4F4	165	ZFY27_HUMAN Protrudin OS=Homo sapiens OX=9606 GN=ZFYVE27 PE=1 SV=1	ND	ND	1.04167	ND	1.04167		0.0588983
825	Q86YV5	905	PRAG1_HUMAN Inactive tyrosine-protein kinase PRAG1 OS=Homo sapiens OX=9606 GN=PRAG1 PE=1 SV=4	1.04167	ND	ND	ND	1.04167		0.0588983
826	Q8IZH2	1304	XRN1_HUMAN 5'-3' exoribonuclease 1 OS=Homo sapiens OX=9606 GN=XRN1 PE=1 SV=1	ND	1.04167	ND	ND	1.04167		0.0588983
827	Q8TCU6	37	PREX1_HUMAN Phosphatidylinositol 3,4,5-trisphosphate-dependent Rac exchanger 1 protein OS=Homo sapiens OX=9606 GN=PREX1 PE=1 SV=3	ND	ND	ND	1.04167	1.04167		0.0588983
828	Q9BRT6	64	LLPH_HUMAN Protein LLP homolog OS=Homo sapiens OX=9606 GN=LLPH PE=1 SV=1	ND	ND	1.04167	ND	1.04167		0.0588983
829	Q9NR09	3673	BIRC6_HUMAN Baculoviral IAP repeat-containing protein 6 OS=Homo sapiens OX=9606 GN=BIRC6 PE=1 SV=2	ND	ND	1.04167	ND	1.04167		0.0588983
830	Q9UPQ3	243	AGAP1_HUMAN Arf-GAP with GTPase, ANK repeat and PH domain-containing protein 1 OS=Homo sapiens OX=9606 GN=AGAP1 PE=1 SV=4	ND	ND	1.04167	ND	1.04167		0.0588983
831	Q9Y4D8	3985	HECD4_HUMAN Probable E3 ubiquitin-protein ligase HECTD4 OS=Homo sapiens OX=9606 GN=HECTD4 PE=1 SV=5	ND	ND	1.04167	ND	1.04167		0.0588983
832	Q9Y277	65	VDAC3_HUMAN Voltage-dependent anion-selective channel protein 3 OS=Homo sapiens OX=9606 GN=VDAC3 PE=1 SV=1	1.08177	1.02498	0.99866	1.06124	1.04166	0.0370559	0.0588879
833	O75663	14	TIPRL_HUMAN TIP41-like protein OS=Homo sapiens OX=9606 GN=TIPRL PE=1 SV=2	0.97087	ND	ND	1.11111	1.04099	0.0991647	0.0579562
834	P0CAP2	82	GRL1A_HUMAN DNA-directed RNA polymerase II subunit GRINL1A OS=Homo sapiens OX=9606 GN=POLR2M PE=1 SV=1	ND	0.97087	1.11111	ND	1.04099	0.0991647	0.0579562
835	Q8IWX8	69	CHERP_HUMAN Calcium homeostasis endoplasmic reticulum protein OS=Homo sapiens OX=9606 GN=CHERP PE=1 SV=3	1.0989	1.03093	1.05263	0.98039	1.04071	0.0492013	0.0575716
836	P49137	98	MAPK2_HUMAN MAP kinase-activated protein kinase 2 OS=Homo sapiens OX=9606 GN=MAPKAPK2 PE=1 SV=1	0.91774	1.04437	1.07151	1.12715	1.04019	0.0886086	0.0568505
837	P54886	612	P5CS_HUMAN Delta-1-pyrroline-5-carboxylate synthase OS=Homo sapiens OX=9606 GN=ALDH18A1 PE=1 SV=2	ND	1.04738	1.05263	1.02041	1.04014	0.0172871	0.0567777
838	Q8NFF5	236	FAD1_HUMAN FAD synthase OS=Homo sapiens OX=9606 GN=FLAD1 PE=1 SV=1	1	ND	1.0989	1.02041	1.03977	0.052215	0.0562644
839	Q14149	15	MORC3_HUMAN MORC family CW-type zinc finger protein 3 OS=Homo sapiens OX=9606 GN=MORC3 PE=1 SV=3	0.99724	1.0101	1.07527	1.07527	1.03947	0.0416703	0.0558481
840	A0AVT1	347	UBA6_HUMAN Ubiquitin-like modifier-activating enzyme 6 OS=Homo sapiens OX=9606 GN=UBA6 PE=1 SV=1	1.00798	1.0162	1.08127	1.05108	1.03913	0.0337377	0.0553796
841	P27635	105	RL10_HUMAN 60S ribosomal protein L10 OS=Homo sapiens OX=9606 GN=RPL10 PE=1 SV=4	1.10031	0.96322	1.07527	1.01701	1.03895	0.0613748	0.0551297
842	O00273	165	DFFA_HUMAN DNA fragmentation factor subunit alpha OS=Homo sapiens OX=9606 GN=DFFA PE=1 SV=1	0.9901	1.13636	ND	0.9901	1.03885	0.0844433	0.054992
843	Q9NR45	287	SIAS_HUMAN Sialic acid synthase OS=Homo sapiens OX=9606 GN=NANS PE=1 SV=2	ND	ND	1.14739	0.92996	1.03868	0.153746	0.0547443
844	Q8IUH4	28	ZDH13_HUMAN Palmitoyltransferase ZDHHC13 OS=Homo sapiens OX=9606 GN=ZDHHC13 PE=1 SV=3	ND	1.0101	1.05263	1.05263	1.03845	0.0245547	0.0544364
845	Q7Z4Q2	57	HEAT3_HUMAN HEAT repeat-containing protein 3 OS=Homo sapiens OX=9606 GN=HEATR3 PE=1 SV=2	ND	0.8547	1.13636	1.1236	1.03822	0.159061	0.0541122
846	P46100	450	ATRX_HUMAN Transcriptional regulator ATRX OS=Homo sapiens OX=9606 GN=ATRX PE=1 SV=5	ND	1.02075	1.02941	1.06383	1.038	0.0227875	0.0538018
847	A7MD96	880	A7MD96_HUMAN SYNPO protein (Fragment) OS=Homo sapiens OX=9606 GN=SYNPO PE=2 SV=1	ND	1.03799	ND	ND	1.03799		0.0537925
848	Q92576	1702	PHF3_HUMAN PHD finger protein 3 OS=Homo sapiens OX=9606 GN=PHF3 PE=1 SV=3	1	ND	1.07527	ND	1.03763	0.0532239	0.053299
849	P46109	249	CRKL_HUMAN Crk-like protein OS=Homo sapiens OX=9606 GN=CRKL PE=1 SV=1	1.06661	1.0279	1.02398	1.0305	1.03725	0.0197576	0.0527602
850	Q05209	470	PTN12_HUMAN Tyrosine-protein phosphatase non-receptor type 12 OS=Homo sapiens OX=9606 GN=PTPN12 PE=1 SV=3	ND	ND	1.06383	1.0101	1.03696	0.0379928	0.0523672
851	P54652	191	HSP72_HUMAN Heat shock-related 70 kDa protein 2 OS=Homo sapiens OX=9606 GN=HSPA2 PE=1 SV=1	ND	ND	0.86156	1.21217	1.03686	0.247919	0.0522281
852	P46013	824	KI67_HUMAN Proliferation marker protein Ki-67 OS=Homo sapiens OX=9606 GN=MKI67 PE=1 SV=2	1.0101	1.08148	0.9901	1.06383	1.03638	0.043282	0.0515496
853	Q29RF7	14	PDS5A_HUMAN Sister chromatid cohesion protein PDS5 homolog A OS=Homo sapiens OX=9606 GN=PDS5A PE=1 SV=1	ND	1.04167	1.03093	ND	1.0363	0.00759433	0.0514417
854	Q969S9	248	RRF2M_HUMAN Ribosome-releasing factor 2, mitochondrial OS=Homo sapiens OX=9606 GN=GFM2 PE=1 SV=1	ND	ND	1.0363	ND	1.0363		0.0514417
855	Q96P47	263	AGAP3_HUMAN Arf-GAP with GTPase, ANK repeat and PH domain-containing protein 3 OS=Homo sapiens OX=9606 GN=AGAP3 PE=1 SV=2	ND	0.98525	1.08696	ND	1.03611	0.0719198	0.0511702
856	Q5MNZ6	63	WIPI3_HUMAN WD repeat domain phosphoinositide-interacting protein 3 OS=Homo sapiens OX=9606 GN=WDR45B PE=2 SV=2	ND	0.90909	1.08696	1.11111	1.03572	0.110328	0.050634
857	O75390	211	CISY_HUMAN Citrate synthase, mitochondrial OS=Homo sapiens OX=9606 GN=CS PE=1 SV=2	1.05263	1.03093	1.02304	ND	1.03553	0.0153227	0.050374
858	Q14008	1500	CKAP5_HUMAN Cytoskeleton-associated protein 5 OS=Homo sapiens OX=9606 GN=CKAP5 PE=1 SV=3	1.0989	1.0509	1.00251	0.98825	1.03514	0.0502564	0.0498259
859	O95425	1101	SVIL_HUMAN Supervillin OS=Homo sapiens OX=9606 GN=SVIL PE=1 SV=2	ND	1.0101	1.04167	1.05263	1.0348	0.0220816	0.049352
860	Q15149	530	PLEC_HUMAN Plectin OS=Homo sapiens OX=9606 GN=PLEC PE=1 SV=3	0.99029	1.05263	1.05263	1.04167	1.03431	0.0297947	0.0486617
861	Q8NFW8	432	NEUA_HUMAN N-acylneuraminate cytidylyltransferase OS=Homo sapiens OX=9606 GN=CMAS PE=1 SV=2	1.02041	1.04167	1.04255	1.03093	1.03389	0.0104243	0.0480827
862	P42356	19	PI4KA_HUMAN Phosphatidylinositol 4-kinase alpha OS=Homo sapiens OX=9606 GN=PI4KA PE=1 SV=4	1.0101	0.98039	ND	1.11111	1.03387	0.0685242	0.0480501
863	O15446	150	RPA34_HUMAN DNA-directed RNA polymerase I subunit RPA34 OS=Homo sapiens OX=9606 GN=CD3EAP PE=1 SV=1	1.05039	1.03093	1.03093	1.02041	1.03316	0.0125084	0.0470707
864	Q96KQ7	126	EHMT2_HUMAN Histone-lysine N-methyltransferase EHMT2 OS=Homo sapiens OX=9606 GN=EHMT2 PE=1 SV=3	ND	1.07337	1.0989	0.92593	1.03273	0.0933711	0.0464678
865	P40763	259	STAT3_HUMAN Signal transducer and activator of transcription 3 OS=Homo sapiens OX=9606 GN=STAT3 PE=1 SV=2	1.04167	ND	0.98039	1.07527	1.03244	0.0481082	0.0460626
866	P05023	463	AT1A1_HUMAN Sodium/potassium-transporting ATPase subunit alpha-1 OS=Homo sapiens OX=9606 GN=ATP1A1 PE=1 SV=1	ND	ND	1	1.06383	1.03192	0.0451346	0.0453241
867	Q6IBS0	141	TWF2_HUMAN Twinfilin-2 OS=Homo sapiens OX=9606 GN=TWF2 PE=1 SV=2	ND	1.06383	1	ND	1.03192	0.0451346	0.0453241
868	Q14699	211	RFTN1_HUMAN Raftlin OS=Homo sapiens OX=9606 GN=RFTN1 PE=1 SV=4	1.02041	ND	1.07527	1	1.03189	0.0389268	0.0452938
869	O15320	628	CTGE5_HUMAN Endoplasmic reticulum export factor CTAGE5 OS=Homo sapiens OX=9606 GN=CTAGE5 PE=1 SV=4	ND	1.05263	1.04167	1	1.03143	0.0277682	0.0446506
870	Q8TBN0	200	R3GEF_HUMAN Guanine nucleotide exchange factor for Rab-3A OS=Homo sapiens OX=9606 GN=RAB3IL1 PE=1 SV=1	1.0101	1.05263	ND	ND	1.03137	0.0300733	0.044555
871	Q8TBN0	204	R3GEF_HUMAN Guanine nucleotide exchange factor for Rab-3A OS=Homo sapiens OX=9606 GN=RAB3IL1 PE=1 SV=1	1.0101	1.05263	ND	ND	1.03137	0.0300733	0.044555
872	P17844	234	DDX5_HUMAN Probable ATP-dependent RNA helicase DDX5 OS=Homo sapiens OX=9606 GN=DDX5 PE=1 SV=1	ND	ND	0.96621	1.09632	1.03126	0.0920017	0.0444151
873	Q4G0F5	334	VP26B_HUMAN Vacuolar protein sorting-associated protein 26B OS=Homo sapiens OX=9606 GN=VPS26B PE=1 SV=2	ND	1.04167	1.02041	ND	1.03104	0.0150331	0.0441003
874	F5H619	1539	F5H619_HUMAN HEAT repeat-containing protein 5A OS=Homo sapiens OX=9606 GN=HEATR5A PE=1 SV=1	ND	1.03093	ND	ND	1.03093		0.0439464
875	O15533	115	TPSN_HUMAN Tapasin OS=Homo sapiens OX=9606 GN=TAPBP PE=1 SV=1	ND	ND	1.03093	ND	1.03093		0.0439464	Disulfide bond&Mutagenesis	Note=Interchain (with C-57 in PDIA3);Ontology_term=ECO:0000255,ECO:0000269;evidence=ECO:0000255|PROSITE-ProRule:PRU00114,ECO:0000269|PubMed:19119025;Dbxref=PMID:19119025$Note=Abolishes the recruitment of PDIA3%2C CALR and B2M to the peptide-loading complex. C->A;Ontology_term=ECO:0000269;evidence=ECO:0000269|PubMed:21263072;Dbxref=PMID:21263072
876	O75179	58	ANR17_HUMAN Ankyrin repeat domain-containing protein 17 OS=Homo sapiens OX=9606 GN=ANKRD17 PE=1 SV=3	ND	ND	1.03093	ND	1.03093		0.0439464
877	P08133	59	ANXA6_HUMAN Annexin A6 OS=Homo sapiens OX=9606 GN=ANXA6 PE=1 SV=3	ND	1.03093	ND	ND	1.03093		0.0439464
878	P08240	253	SRPRA_HUMAN Signal recognition particle receptor subunit alpha OS=Homo sapiens OX=9606 GN=SRPRA PE=1 SV=2	1.03093	ND	ND	1.03093	1.03093	0	0.0439464
879	P17676	184	CEBPB_HUMAN CCAAT/enhancer-binding protein beta OS=Homo sapiens OX=9606 GN=CEBPB PE=1 SV=2	ND	ND	ND	1.03093	1.03093		0.0439464
880	P26640	41	SYVC_HUMAN Valine--tRNA ligase OS=Homo sapiens OX=9606 GN=VARS PE=1 SV=4	ND	ND	1.03093	ND	1.03093		0.0439464
881	P30048	60	PRDX3_HUMAN Thioredoxin-dependent peroxide reductase, mitochondrial OS=Homo sapiens OX=9606 GN=PRDX3 PE=1 SV=3	ND	1.03093	ND	ND	1.03093		0.0439464
882	P49759	84	CLK1_HUMAN Dual specificity protein kinase CLK1 OS=Homo sapiens OX=9606 GN=CLK1 PE=1 SV=2	ND	ND	ND	1.03093	1.03093		0.0439464
883	Q13888	299	TF2H2_HUMAN General transcription factor IIH subunit 2 OS=Homo sapiens OX=9606 GN=GTF2H2 PE=1 SV=1	ND	1.03093	ND	ND	1.03093		0.0439464
884	Q3KQU3	251	MA7D1_HUMAN MAP7 domain-containing protein 1 OS=Homo sapiens OX=9606 GN=MAP7D1 PE=1 SV=1	ND	ND	1.03093	ND	1.03093		0.0439464
885	Q6P0N0	206	M18BP_HUMAN Mis18-binding protein 1 OS=Homo sapiens OX=9606 GN=MIS18BP1 PE=1 SV=1	ND	ND	1.03093	ND	1.03093		0.0439464
886	Q6ZV73	614	FGD6_HUMAN FYVE, RhoGEF and PH domain-containing protein 6 OS=Homo sapiens OX=9606 GN=FGD6 PE=1 SV=2	ND	1.03093	ND	ND	1.03093		0.0439464
887	Q96T76	750	MMS19_HUMAN MMS19 nucleotide excision repair protein homolog OS=Homo sapiens OX=9606 GN=MMS19 PE=1 SV=2	ND	ND	ND	1.03093	1.03093		0.0439464
888	Q9BYB4	175	GNB1L_HUMAN Guanine nucleotide-binding protein subunit beta-like protein 1 OS=Homo sapiens OX=9606 GN=GNB1L PE=1 SV=2	ND	1.03093	ND	ND	1.03093		0.0439464
889	Q9GZS1	143	RPA49_HUMAN DNA-directed RNA polymerase I subunit RPA49 OS=Homo sapiens OX=9606 GN=POLR1E PE=1 SV=2	1.03093	ND	ND	ND	1.03093		0.0439464
890	Q9H2Y7	457	ZN106_HUMAN Zinc finger protein 106 OS=Homo sapiens OX=9606 GN=ZNF106 PE=1 SV=1	ND	ND	1.03093	ND	1.03093		0.0439464
891	Q9NWK9	171	BCD1_HUMAN Box C/D snoRNA protein 1 OS=Homo sapiens OX=9606 GN=ZNHIT6 PE=1 SV=1	ND	ND	1.03093	ND	1.03093		0.0439464
892	Q99996	3521	AKAP9_HUMAN A-kinase anchor protein 9 OS=Homo sapiens OX=9606 GN=AKAP9 PE=1 SV=4	ND	1.05263	0.94124	1.0989	1.03092	0.0810404	0.043937
893	Q13619	633	CUL4A_HUMAN Cullin-4A OS=Homo sapiens OX=9606 GN=CUL4A PE=1 SV=3	1.07527	1.07527	1.0101	0.96154	1.03055	0.0553183	0.0434075
894	Q8WVY7	154	UBCP1_HUMAN Ubiquitin-like domain-containing CTD phosphatase 1 OS=Homo sapiens OX=9606 GN=UBLCP1 PE=1 SV=2	1.05263	0.91694	1.12179	ND	1.03045	0.10421	0.0432792
895	A0A1S5UYZ9	1082	A0A1S5UYZ9_HUMAN Diaphanous related formin 2 OS=Homo sapiens OX=9606 GN=DIAPH2 PE=2 SV=1	ND	0.95785	1.05823	1.07527	1.03045	0.0634481	0.0432745
896	Q9NP61	241	ARFG3_HUMAN ADP-ribosylation factor GTPase-activating protein 3 OS=Homo sapiens OX=9606 GN=ARFGAP3 PE=1 SV=1	0.93458	1.06813	1.08756	1.03093	1.0303	0.0680013	0.0430645
897	Q92665	67	RT31_HUMAN 28S ribosomal protein S31, mitochondrial OS=Homo sapiens OX=9606 GN=MRPS31 PE=1 SV=3	ND	ND	1.21951	0.84034	1.02992	0.268114	0.0425393
898	O15085	47	ARHGB_HUMAN Rho guanine nucleotide exchange factor 11 OS=Homo sapiens OX=9606 GN=ARHGEF11 PE=1 SV=1	1.06955	1.0101	ND	1.0101	1.02992	0.0343235	0.0425276
899	P31040	189	SDHA_HUMAN Succinate dehydrogenase [ubiquinone] flavoprotein subunit, mitochondrial OS=Homo sapiens OX=9606 GN=SDHA PE=1 SV=2	ND	1.05263	1.07527	0.96154	1.02981	0.0602003	0.0423829
900	Q9HCK8	1780	CHD8_HUMAN Chromodomain-helicase-DNA-binding protein 8 OS=Homo sapiens OX=9606 GN=CHD8 PE=1 SV=5	ND	1.0989	0.98039	1.0101	1.0298	0.0616614	0.0423595
901	Q9Y6K5	350	OAS3_HUMAN 2'-5'-oligoadenylate synthase 3 OS=Homo sapiens OX=9606 GN=OAS3 PE=1 SV=3	1	ND	1.16279	0.92593	1.02957	0.121168	0.0420466
902	Q13506	130	NAB1_HUMAN NGFI-A-binding protein 1 OS=Homo sapiens OX=9606 GN=NAB1 PE=1 SV=2	ND	0.91743	1.15003	1.02041	1.02929	0.116554	0.0416495
903	Q14980	1136	NUMA1_HUMAN Nuclear mitotic apparatus protein 1 OS=Homo sapiens OX=9606 GN=NUMA1 PE=1 SV=2	ND	0.93458	1.1236	ND	1.02909	0.133657	0.0413692
904	P78527	3837	PRKDC_HUMAN DNA-dependent protein kinase catalytic subunit OS=Homo sapiens OX=9606 GN=PRKDC PE=1 SV=3	0.9901	1.08696	1.0101	ND	1.02905	0.051136	0.0413178
905	Q9H329	437	E41LB_HUMAN Band 4.1-like protein 4B OS=Homo sapiens OX=9606 GN=EPB41L4B PE=2 SV=2	ND	1.04981	1.01546	1.02178	1.02902	0.0182827	0.0412663
906	Q9HBM0	412	VEZA_HUMAN Vezatin OS=Homo sapiens OX=9606 GN=VEZT PE=1 SV=3	ND	0.97087	1.08696	ND	1.02892	0.082088	0.0411238
907	Q14CS0	127	UBX2B_HUMAN UBX domain-containing protein 2B OS=Homo sapiens OX=9606 GN=UBXN2B PE=1 SV=1	1.07527	ND	0.98039	1.03093	1.02886	0.0474737	0.0410514
908	Q96QR8	17	PURB_HUMAN Transcriptional activator protein Pur-beta OS=Homo sapiens OX=9606 GN=PURB PE=1 SV=3	1.0001	1.08696	1.0323	0.99604	1.02885	0.0419989	0.0410327
909	Q9NZB2	531	F120A_HUMAN Constitutive coactivator of PPAR-gamma-like protein 1 OS=Homo sapiens OX=9606 GN=FAM120A PE=1 SV=2	1.11367	0.97124	ND	1.00102	1.02864	0.0751256	0.0407428
910	P57764	56	GSDMD_HUMAN Gasdermin-D OS=Homo sapiens OX=9606 GN=GSDMD PE=1 SV=1	1.07527	ND	1.02041	0.9901	1.02859	0.0431707	0.0406727
911	Q86XK2	581	FBX11_HUMAN F-box only protein 11 OS=Homo sapiens OX=9606 GN=FBXO11 PE=1 SV=3	1.07527	ND	0.9901	1.02041	1.02859	0.0431707	0.0406727
912	Q9NYH9	370	UTP6_HUMAN U3 small nucleolar RNA-associated protein 6 homolog OS=Homo sapiens OX=9606 GN=UTP6 PE=2 SV=2	ND	0.99505	1.07028	1.02041	1.02858	0.0382747	0.040654
913	Q9Y600	356	CSAD_HUMAN Cysteine sulfinic acid decarboxylase OS=Homo sapiens OX=9606 GN=CSAD PE=1 SV=2	ND	0.9901	1.03093	1.06383	1.02829	0.036936	0.0402425
914	P22102	41	PUR2_HUMAN Trifunctional purine biosynthetic protein adenosine-3 OS=Homo sapiens OX=9606 GN=GART PE=1 SV=1	1.16279	0.9009	1.02041	ND	1.02803	0.131111	0.039887
915	Q9NUE0	156	ZDH18_HUMAN Palmitoyltransferase ZDHHC18 OS=Homo sapiens OX=9606 GN=ZDHHC18 PE=1 SV=2	ND	1.02041	0.95238	1.11111	1.02797	0.0796344	0.0397935
916	Q9Y678	169	COPG1_HUMAN Coatomer subunit gamma-1 OS=Homo sapiens OX=9606 GN=COPG1 PE=1 SV=1	ND	0.98039	1.07527	ND	1.02783	0.0670903	0.0396017
917	Q96R06	1035	SPAG5_HUMAN Sperm-associated antigen 5 OS=Homo sapiens OX=9606 GN=SPAG5 PE=1 SV=2	ND	1.16279	0.89286	ND	1.02782	0.190869	0.0395946
918	P52732	911	KIF11_HUMAN Kinesin-like protein KIF11 OS=Homo sapiens OX=9606 GN=KIF11 PE=1 SV=2	ND	0.91743	1.04167	1.1236	1.02757	0.103806	0.039232
919	Q06210	55	GFPT1_HUMAN Glutamine--fructose-6-phosphate aminotransferase [isomerizing] 1 OS=Homo sapiens OX=9606 GN=GFPT1 PE=1 SV=3	ND	ND	ND	1.02742	1.02742		0.0390261
920	P38606	138	VATA_HUMAN V-type proton ATPase catalytic subunit A OS=Homo sapiens OX=9606 GN=ATP6V1A PE=1 SV=2	1.02588	1.02594	1.02336	1.03394	1.02728	0.00459991	0.0388295
921	Q8IWC1	572	MA7D3_HUMAN MAP7 domain-containing protein 3 OS=Homo sapiens OX=9606 GN=MAP7D3 PE=1 SV=2	1.03093	1.08696	0.9901	1	1.027	0.0435938	0.0384327
922	Q9Y6J9	230	TAF6L_HUMAN TAF6-like RNA polymerase II p300/CBP-associated factor-associated factor 65 kDa subunit 6L OS=Homo sapiens OX=9606 GN=TAF6L PE=1 SV=1	1.07527	1.0101	1.03093	0.9901	1.0266	0.0364784	0.0378742
923	P45880	47	VDAC2_HUMAN Voltage-dependent anion-selective channel protein 2 OS=Homo sapiens OX=9606 GN=VDAC2 PE=1 SV=2	1.05263	1.06818	1.07546	0.90909	1.02634	0.0787445	0.0375087
924	F8W8C2	198	F8W8C2_HUMAN Vezatin (Fragment) OS=Homo sapiens OX=9606 GN=VEZT PE=1 SV=1	1.05263	ND	1	ND	1.02631	0.037215	0.0374736
925	P49790	753	NU153_HUMAN Nuclear pore complex protein Nup153 OS=Homo sapiens OX=9606 GN=NUP153 PE=1 SV=2	ND	1.05263	ND	1	1.02631	0.037215	0.0374736
926	Q99439	215	CNN2_HUMAN Calponin-2 OS=Homo sapiens OX=9606 GN=CNN2 PE=1 SV=4	1.05579	1.07527	0.97087	1.00333	1.02631	0.0478464	0.0374736
927	Q14331	205	FRG1_HUMAN Protein FRG1 OS=Homo sapiens OX=9606 GN=FRG1 PE=1 SV=1	ND	1.13636	0.9901	0.95238	1.02628	0.0971798	0.0374244
928	P30838	217	AL3A1_HUMAN Aldehyde dehydrogenase, dimeric NADP-preferring OS=Homo sapiens OX=9606 GN=ALDH3A1 PE=1 SV=3	ND	1.04167	1.0101	ND	1.02589	0.0223234	0.036869
929	P29372	61	3MG_HUMAN DNA-3-methyladenine glycosylase OS=Homo sapiens OX=9606 GN=MPG PE=1 SV=3	ND	1.02041	ND	1.03093	1.02567	0.00743876	0.0365666
930	Q07157	744	ZO1_HUMAN Tight junction protein ZO-1 OS=Homo sapiens OX=9606 GN=TJP1 PE=1 SV=3	ND	1.02041	ND	1.03093	1.02567	0.00743876	0.0365666
931	Q9BQ70	216	TCF25_HUMAN Transcription factor 25 OS=Homo sapiens OX=9606 GN=TCF25 PE=1 SV=1	ND	1.02041	ND	1.03093	1.02567	0.00743876	0.0365666
932	P45974	471	UBP5_HUMAN Ubiquitin carboxyl-terminal hydrolase 5 OS=Homo sapiens OX=9606 GN=USP5 PE=1 SV=2	1.05263	ND	0.97087	1.05263	1.02538	0.0472042	0.036154	Disulfide bond	Ontology_term=ECO:0000269;evidence=ECO:0000269|Ref.23
933	B2RTY4	1468	MYO9A_HUMAN Unconventional myosin-IXa OS=Homo sapiens OX=9606 GN=MYO9A PE=1 SV=2	ND	1.04905	1	ND	1.02453	0.0346836	0.0349552
934	O15091	568	MRPP3_HUMAN Mitochondrial ribonuclease P catalytic subunit OS=Homo sapiens OX=9606 GN=KIAA0391 PE=1 SV=2	0.9901	0.9901	1.04167	1.07527	1.02428	0.0417889	0.0346172
935	Q14980	160	NUMA1_HUMAN Nuclear mitotic apparatus protein 1 OS=Homo sapiens OX=9606 GN=NUMA1 PE=1 SV=2	1.03179	1.25365	0.95238	0.85901	1.02421	0.168474	0.034508
936	Q08378	1431	GOGA3_HUMAN Golgin subfamily A member 3 OS=Homo sapiens OX=9606 GN=GOLGA3 PE=1 SV=2	1.03093	0.98039	1.05263	1.03093	1.02372	0.0306444	0.0338212
937	Q9Y277	8	VDAC3_HUMAN Voltage-dependent anion-selective channel protein 3 OS=Homo sapiens OX=9606 GN=VDAC3 PE=1 SV=1	1.00566	1.01789	1.01525	1.05467	1.02337	0.0215197	0.0333243
938	Q9BPY3	319	F118B_HUMAN Protein FAM118B OS=Homo sapiens OX=9606 GN=FAM118B PE=1 SV=1	ND	1.21964	0.8265	ND	1.02307	0.277992	0.0329049
939	Q8NHV4	66	NEDD1_HUMAN Protein NEDD1 OS=Homo sapiens OX=9606 GN=NEDD1 PE=1 SV=1	0.93458	ND	1.11111	ND	1.02285	0.124826	0.0325875
940	P07437	12	TBB5_HUMAN Tubulin beta chain OS=Homo sapiens OX=9606 GN=TUBB PE=1 SV=2	1.08696	ND	1.01981	0.96154	1.02277	0.0627624	0.0324817
941	A3KN83	445	SBNO1_HUMAN Protein strawberry notch homolog 1 OS=Homo sapiens OX=9606 GN=SBNO1 PE=1 SV=1	ND	0.93458	1.1236	1.0101	1.02276	0.0951438	0.0324676
942	Q96LD4	347	TRI47_HUMAN Tripartite motif-containing protein 47 OS=Homo sapiens OX=9606 GN=TRIM47 PE=1 SV=2	ND	1.04784	1.02041	1	1.02275	0.0240057	0.0324535
943	P31948	461	STIP1_HUMAN Stress-induced-phosphoprotein 1 OS=Homo sapiens OX=9606 GN=STIP1 PE=1 SV=1	1.12306	1.02041	0.92593	1.02076	1.02254	0.0805098	0.0321573
944	B7Z4B7	223	B7Z4B7_HUMAN cDNA FLJ52561, highly similar to Four and a half LIM domains protein 1 OS=Homo sapiens OX=9606 PE=2 SV=1	ND	1.04167	0.96154	1.06383	1.02235	0.0538131	0.0318845
945	Q6GQQ9	708	OTU7B_HUMAN OTU domain-containing protein 7B OS=Homo sapiens OX=9606 GN=OTUD7B PE=1 SV=1	0.98039	1.0101	ND	1.07527	1.02192	0.0485318	0.0312823
946	Q9UIC8	30	LCMT1_HUMAN Leucine carboxyl methyltransferase 1 OS=Homo sapiens OX=9606 GN=LCMT1 PE=1 SV=2	ND	ND	0.9901	1.05263	1.02136	0.0442154	0.0304985
947	P49327	1548	FAS_HUMAN Fatty acid synthase OS=Homo sapiens OX=9606 GN=FASN PE=1 SV=3	ND	0.9434	1.0989	ND	1.02115	0.109955	0.0301948
948	Q00536	206	CDK16_HUMAN Cyclin-dependent kinase 16 OS=Homo sapiens OX=9606 GN=CDK16 PE=1 SV=1	0.92601	0.93365	1.14958	1.07527	1.02113	0.109744	0.030163
949	P18583	2070	SON_HUMAN Protein SON OS=Homo sapiens OX=9606 GN=SON PE=1 SV=4	0.86207	1.16279	1.26582	0.79365	1.02108	0.228756	0.0300994
950	Q9Y2H6	211	FND3A_HUMAN Fibronectin type-III domain-containing protein 3A OS=Homo sapiens OX=9606 GN=FNDC3A PE=1 SV=4	ND	0.9901	1.02041	1.05263	1.02105	0.0312699	0.0300488
951	Q07889	405	SOS1_HUMAN Son of sevenless homolog 1 OS=Homo sapiens OX=9606 GN=SOS1 PE=1 SV=1	1.0101	1.03093	ND	ND	1.02052	0.014729	0.0292974
952	Q68D10	535	SPT2_HUMAN Protein SPT2 homolog OS=Homo sapiens OX=9606 GN=SPTY2D1 PE=1 SV=3	ND	ND	1.03093	1.0101	1.02052	0.014729	0.0292974
953	Q9NRI5	684	DISC1_HUMAN Disrupted in schizophrenia 1 protein OS=Homo sapiens OX=9606 GN=DISC1 PE=1 SV=3	ND	1.03093	1.0101	ND	1.02052	0.014729	0.0292974
954	O14920	464	IKKB_HUMAN Inhibitor of nuclear factor kappa-B kinase subunit beta OS=Homo sapiens OX=9606 GN=IKBKB PE=1 SV=1	ND	1.02041	1.0101	1.03093	1.02048	0.0104152	0.0292479	Mutagenesis	Note=Loss of activation of NF-kappa-B signaling. Missing;Ontology_term=ECO:0000269;evidence=ECO:0000269|PubMed:30337470;Dbxref=PMID:30337470
955	A0A1C7CYX9	39	A0A1C7CYX9_HUMAN Dihydropyrimidinase-related protein 2 OS=Homo sapiens OX=9606 GN=DPYSL2 PE=1 SV=1	ND	1.02041	ND	ND	1.02041		0.0291489
956	O00562	259	PITM1_HUMAN Membrane-associated phosphatidylinositol transfer protein 1 OS=Homo sapiens OX=9606 GN=PITPNM1 PE=1 SV=4	ND	ND	1.02041	ND	1.02041		0.0291489
957	O75116	607	ROCK2_HUMAN Rho-associated protein kinase 2 OS=Homo sapiens OX=9606 GN=ROCK2 PE=1 SV=4	1.02041	ND	ND	ND	1.02041		0.0291489
958	P00813	75	ADA_HUMAN Adenosine deaminase OS=Homo sapiens OX=9606 GN=ADA PE=1 SV=3	ND	ND	1.02041	ND	1.02041		0.0291489
959	P30519	265	HMOX2_HUMAN Heme oxygenase 2 OS=Homo sapiens OX=9606 GN=HMOX2 PE=1 SV=2	1.02041	ND	ND	1.02041	1.02041	0	0.0291489
960	Q09666	2162	AHNK_HUMAN Neuroblast differentiation-associated protein AHNAK OS=Homo sapiens OX=9606 GN=AHNAK PE=1 SV=2	ND	1.02041	ND	ND	1.02041		0.0291489
961	Q13838	165	DX39B_HUMAN Spliceosome RNA helicase DDX39B OS=Homo sapiens OX=9606 GN=DDX39B PE=1 SV=1	ND	1.02041	ND	ND	1.02041		0.0291489
962	Q6P1M0	232	S27A4_HUMAN Long-chain fatty acid transport protein 4 OS=Homo sapiens OX=9606 GN=SLC27A4 PE=1 SV=1	ND	1.02041	ND	ND	1.02041		0.0291489
963	Q8NEZ2	325	VP37A_HUMAN Vacuolar protein sorting-associated protein 37A OS=Homo sapiens OX=9606 GN=VPS37A PE=1 SV=1	ND	ND	1.02041	ND	1.02041		0.0291489
964	Q8TDY2	839	RBCC1_HUMAN RB1-inducible coiled-coil protein 1 OS=Homo sapiens OX=9606 GN=RB1CC1 PE=1 SV=3	ND	1.02041	ND	ND	1.02041		0.0291489
965	Q96FC7	17	PHIPL_HUMAN Phytanoyl-CoA hydroxylase-interacting protein-like OS=Homo sapiens OX=9606 GN=PHYHIPL PE=1 SV=3	ND	1.02041	ND	ND	1.02041		0.0291489
966	Q96J02	57	ITCH_HUMAN E3 ubiquitin-protein ligase Itchy homolog OS=Homo sapiens OX=9606 GN=ITCH PE=1 SV=2	ND	ND	ND	1.02041	1.02041		0.0291489
967	Q96NW4	720	ANR27_HUMAN Ankyrin repeat domain-containing protein 27 OS=Homo sapiens OX=9606 GN=ANKRD27 PE=1 SV=2	ND	1.02041	ND	ND	1.02041		0.0291489
968	Q9H2F5	566	EPC1_HUMAN Enhancer of polycomb homolog 1 OS=Homo sapiens OX=9606 GN=EPC1 PE=1 SV=1	ND	1.02041	ND	ND	1.02041		0.0291489
969	P60468	39	SC61B_HUMAN Protein transport protein Sec61 subunit beta OS=Homo sapiens OX=9606 GN=SEC61B PE=1 SV=2	1.04178	1.04178	0.9528	1.04174	1.01953	0.0444833	0.0278972	Mutagenesis	Note=Abolishes S-acylation. C->S;Ontology_term=ECO:0000269;evidence=ECO:0000269|PubMed:21044946;Dbxref=PMID:21044946
970	Q00839	562	HNRPU_HUMAN Heterogeneous nuclear ribonucleoprotein U OS=Homo sapiens OX=9606 GN=HNRNPU PE=1 SV=6	1.0101	1.04167	1.00505	ND	1.01894	0.019846	0.0270691
971	Q14296	212	FASTK_HUMAN Fas-activated serine/threonine kinase OS=Homo sapiens OX=9606 GN=FASTK PE=1 SV=1	ND	1.05263	0.89286	1.11111	1.01887	0.112974	0.0269653
972	Q8NFH5	255	NUP35_HUMAN Nucleoporin NUP35 OS=Homo sapiens OX=9606 GN=NUP35 PE=1 SV=1	1.01651	1.02041	ND	ND	1.01846	0.00275772	0.0263893
973	P22061	102	PIMT_HUMAN Protein-L-isoaspartate(D-aspartate) O-methyltransferase OS=Homo sapiens OX=9606 GN=PCMT1 PE=1 SV=4	0.98525	1.02048	1.02588	1.04167	1.01832	0.0238094	0.026191
974	Q14980	1937	NUMA1_HUMAN Nuclear mitotic apparatus protein 1 OS=Homo sapiens OX=9606 GN=NUMA1 PE=1 SV=2	1.08696	1.05263	0.83339	1.0989	1.01797	0.124607	0.025695
975	O95197	34	RTN3_HUMAN Reticulon-3 OS=Homo sapiens OX=9606 GN=RTN3 PE=1 SV=2	0.99844	0.98742	0.98639	1.09894	1.0178	0.0543692	0.0254506
976	P37268	374	FDFT_HUMAN Squalene synthase OS=Homo sapiens OX=9606 GN=FDFT1 PE=1 SV=1	1.03255	0.96578	1.00877	1.06383	1.01773	0.0413277	0.0253584
977	Q9C0C2	1296	TB182_HUMAN 182 kDa tankyrase-1-binding protein OS=Homo sapiens OX=9606 GN=TNKS1BP1 PE=1 SV=4	ND	ND	1.07629	0.95849	1.01739	0.0832972	0.0248728
978	O75150	950	BRE1B_HUMAN E3 ubiquitin-protein ligase BRE1B OS=Homo sapiens OX=9606 GN=RNF40 PE=1 SV=4	ND	1.06383	0.97087	ND	1.01735	0.0657326	0.0248161
979	Q9UPY3	1621	DICER_HUMAN Endoribonuclease Dicer OS=Homo sapiens OX=9606 GN=DICER1 PE=1 SV=3	ND	0.8717	1.16279	ND	1.01724	0.205832	0.0246672
980	Q96C19	172	EFHD2_HUMAN EF-hand domain-containing protein D2 OS=Homo sapiens OX=9606 GN=EFHD2 PE=1 SV=1	1.02041	ND	1.03093	1.0001	1.01715	0.0156719	0.0245277
981	Q08J23	502	NSUN2_HUMAN tRNA (cytosine(34)-C(5))-methyltransferase OS=Homo sapiens OX=9606 GN=NSUN2 PE=1 SV=2	0.92727	0.88878	1.07167	1.18005	1.01694	0.134246	0.0242381
982	O00629	57	IMA3_HUMAN Importin subunit alpha-3 OS=Homo sapiens OX=9606 GN=KPNA4 PE=1 SV=1	1.06383	0.93458	1.08696	0.98039	1.01644	0.0712263	0.0235251
983	P21333	1018	FLNA_HUMAN Filamin-A OS=Homo sapiens OX=9606 GN=FLNA PE=1 SV=4	0.96154	1.02041	1.03093	1.05263	1.01638	0.038942	0.0234363
984	Q7L2J0	419	MEPCE_HUMAN 7SK snRNA methylphosphate capping enzyme OS=Homo sapiens OX=9606 GN=MEPCE PE=1 SV=1	ND	ND	ND	1.01622	1.01622		0.0232128
985	O15269	438	SPTC1_HUMAN Serine palmitoyltransferase 1 OS=Homo sapiens OX=9606 GN=SPTLC1 PE=1 SV=1	0.99296	1.0417	1.01281	1.0174	1.01622	0.0200273	0.0232092
986	A0A1B0GV68	729	A0A1B0GV68_HUMAN FERM, ARHGEF and pleckstrin domain-containing protein 1 OS=Homo sapiens OX=9606 GN=FARP1 PE=1 SV=1	ND	1.13836	1.00078	0.90909	1.01608	0.115398	0.0230093
987	P22087	99	FBRL_HUMAN rRNA 2'-O-methyltransferase fibrillarin OS=Homo sapiens OX=9606 GN=FBL PE=1 SV=2	ND	1.03093	1	ND	1.01546	0.0218708	0.0221405
988	Q13111	465	CAF1A_HUMAN Chromatin assembly factor 1 subunit A OS=Homo sapiens OX=9606 GN=CHAF1A PE=1 SV=3	ND	ND	1.03093	1	1.01546	0.0218708	0.0221405
989	Q96HC4	213	PDLI5_HUMAN PDZ and LIM domain protein 5 OS=Homo sapiens OX=9606 GN=PDLIM5 PE=1 SV=5	1	ND	1.03093	ND	1.01546	0.0218708	0.0221405
990	Q6NW34	419	NEPRO_HUMAN Nucleolus and neural progenitor protein OS=Homo sapiens OX=9606 GN=NEPRO PE=1 SV=3	ND	1.0101	1.02041	ND	1.01526	0.00729027	0.0218421
991	Q96JP5	182	ZFP91_HUMAN E3 ubiquitin-protein ligase ZFP91 OS=Homo sapiens OX=9606 GN=ZFP91 PE=1 SV=1	1.0101	1.02041	ND	ND	1.01526	0.00729027	0.0218421
992	P49792	2577	RBP2_HUMAN E3 SUMO-protein ligase RanBP2 OS=Homo sapiens OX=9606 GN=RANBP2 PE=1 SV=2	ND	1.01525	ND	ND	1.01525		0.021835
993	Q9UNE7	199	CHIP_HUMAN E3 ubiquitin-protein ligase CHIP OS=Homo sapiens OX=9606 GN=STUB1 PE=1 SV=2	1.03093	1.08795	0.97087	0.97087	1.01516	0.0561851	0.0217
994	Q562E7	76	WDR81_HUMAN WD repeat-containing protein 81 OS=Homo sapiens OX=9606 GN=WDR81 PE=1 SV=2	ND	0.88496	1.23457	0.92593	1.01515	0.191121	0.0216977
995	P13804	155	ETFA_HUMAN Electron transfer flavoprotein subunit alpha, mitochondrial OS=Homo sapiens OX=9606 GN=ETFA PE=1 SV=1	ND	1	1.06383	0.98039	1.01474	0.0436292	0.0211101
996	P35579	91	MYH9_HUMAN Myosin-9 OS=Homo sapiens OX=9606 GN=MYH9 PE=1 SV=4	ND	1.02041	0.96491	1.05847	1.0146	0.0470501	0.0209063
997	Q8NC60	393	NOA1_HUMAN Nitric oxide-associated protein 1 OS=Homo sapiens OX=9606 GN=NOA1 PE=1 SV=2	1.14943	1.06383	0.79133	1.05263	1.01431	0.15481	0.0204915
998	Q9NRL3	337	STRN4_HUMAN Striatin-4 OS=Homo sapiens OX=9606 GN=STRN4 PE=1 SV=2	0.93267	1.09485	ND	ND	1.01376	0.114679	0.0197161
999	Q8N5C6	294	SRBD1_HUMAN S1 RNA-binding domain-containing protein 1 OS=Homo sapiens OX=9606 GN=SRBD1 PE=1 SV=2	0.97405	1.0101	1.04715	1.02357	1.01372	0.0305581	0.0196557
1000	Q9UNS1	700	TIM_HUMAN Protein timeless homolog OS=Homo sapiens OX=9606 GN=TIMELESS PE=1 SV=2	1.02041	ND	1.02041	1	1.01361	0.0117837	0.0194979
1001	P49748	237	ACADV_HUMAN Very long-chain specific acyl-CoA dehydrogenase, mitochondrial OS=Homo sapiens OX=9606 GN=ACADVL PE=1 SV=1	1.04441	1.08439	0.96459	0.96063	1.0135	0.0610143	0.0193532	Modified residue	Note=S-nitrosocysteine;Ontology_term=ECO:0000250;evidence=ECO:0000250|UniProtKB:P50544
1002	Q5VZ89	126	DEN4C_HUMAN DENN domain-containing protein 4C OS=Homo sapiens OX=9606 GN=DENND4C PE=1 SV=3	0.99505	0.99672	1.08908	0.97281	1.01341	0.0516073	0.0192251
1003	Q9NP81	64	SYSM_HUMAN Serine--tRNA ligase, mitochondrial OS=Homo sapiens OX=9606 GN=SARS2 PE=1 SV=1	1.13636	0.86207	1.04167	ND	1.01337	0.139318	0.0191563
1004	I3L2J0	1245	I3L2J0_HUMAN Protein capicua homolog OS=Homo sapiens OX=9606 GN=CIC PE=1 SV=1	1.05263	1.02041	0.98039	1	1.01336	0.0308618	0.0191432
1005	Q9BZI7	319	REN3B_HUMAN Regulator of nonsense transcripts 3B OS=Homo sapiens OX=9606 GN=UPF3B PE=1 SV=1	1.03093	1	1.02041	1	1.01283	0.0154303	0.0183992
1006	Q14192	132	FHL2_HUMAN Four and a half LIM domains protein 2 OS=Homo sapiens OX=9606 GN=FHL2 PE=1 SV=3	1.06383	0.96154	ND	ND	1.01269	0.07233	0.0181855
1007	Q9BSJ8	635	ESYT1_HUMAN Extended synaptotagmin-1 OS=Homo sapiens OX=9606 GN=ESYT1 PE=1 SV=1	ND	1.06383	0.96154	ND	1.01269	0.07233	0.0181855
1008	O15523	62	DDX3Y_HUMAN ATP-dependent RNA helicase DDX3Y OS=Homo sapiens OX=9606 GN=DDX3Y PE=1 SV=2	1.02668	1.0002	0.98039	1.04167	1.01223	0.0272887	0.0175443
1009	Q96J01	25	THOC3_HUMAN THO complex subunit 3 OS=Homo sapiens OX=9606 GN=THOC3 PE=1 SV=1	ND	1.00361	1.02041	ND	1.01201	0.0118794	0.0172235
1010	P24941	177	CDK2_HUMAN Cyclin-dependent kinase 2 OS=Homo sapiens OX=9606 GN=CDK2 PE=1 SV=2	ND	0.95238	1.03093	1.05263	1.01198	0.0527432	0.0171808
1011	Q9Y4E5	150	ZN451_HUMAN E3 SUMO-protein ligase ZNF451 OS=Homo sapiens OX=9606 GN=ZNF451 PE=1 SV=2	ND	1.03093	1.05263	0.95238	1.01198	0.0527432	0.0171808
1012	P49207	46	RL34_HUMAN 60S ribosomal protein L34 OS=Homo sapiens OX=9606 GN=RPL34 PE=1 SV=3	1.03093	1.2004	1.14943	0.66667	1.01186	0.240827	0.0170061
1013	P0DPB5	37	RPC22_HUMAN Protein POLR1D, isoform 2 OS=Homo sapiens OX=9606 GN=POLR1D PE=1 SV=1	1.03809	1.0101	0.97087	1.02778	1.01171	0.0295784	0.0167958
1014	Q9Y512	457	SAM50_HUMAN Sorting and assembly machinery component 50 homolog OS=Homo sapiens OX=9606 GN=SAMM50 PE=1 SV=3	ND	1.04167	1.1236	0.86957	1.01161	0.129655	0.016658
1015	Q96NL8	33	CH037_HUMAN Protein C8orf37 OS=Homo sapiens OX=9606 GN=C8orf37 PE=1 SV=1	0.93458	1.02041	1.06051	1.03093	1.01161	0.0540849	0.0166496
1016	P60981	46	DEST_HUMAN Destrin OS=Homo sapiens OX=9606 GN=DSTN PE=1 SV=3	1.00505	1.02041	1	1.02041	1.01147	0.0105297	0.01645
1017	Q14980	1930	NUMA1_HUMAN Nuclear mitotic apparatus protein 1 OS=Homo sapiens OX=9606 GN=NUMA1 PE=1 SV=2	1.02041	1	1.01389	ND	1.01143	0.0104244	0.0164012
1018	Q8N2K0	52	ABD12_HUMAN Monoacylglycerol lipase ABHD12 OS=Homo sapiens OX=9606 GN=ABHD12 PE=1 SV=2	1.07527	0.98039	1	0.98893	1.01115	0.0434956	0.0159935
1019	O95347	1174	SMC2_HUMAN Structural maintenance of chromosomes protein 2 OS=Homo sapiens OX=9606 GN=SMC2 PE=1 SV=2	0.98039	1.05263	1	ND	1.01101	0.0373566	0.0157925
1020	Q9UMS0	210	NFU1_HUMAN NFU1 iron-sulfur cluster scaffold homolog, mitochondrial OS=Homo sapiens OX=9606 GN=NFU1 PE=1 SV=2	ND	1.05263	0.9901	0.9901	1.01094	0.0361017	0.0157021	Metal binding	Note=Iron-sulfur (4Fe-4S)%3B shared with dimeric partner;Ontology_term=ECO:0000305;evidence=ECO:0000305|PubMed:27818104;Dbxref=PMID:27818104
1021	Q3SXM5	265	HSDL1_HUMAN Inactive hydroxysteroid dehydrogenase-like protein 1 OS=Homo sapiens OX=9606 GN=HSDL1 PE=1 SV=3	1.03093	0.9901	ND	ND	1.01051	0.0288712	0.0150907
1022	Q5VUA4	2040	ZN318_HUMAN Zinc finger protein 318 OS=Homo sapiens OX=9606 GN=ZNF318 PE=1 SV=2	ND	0.9901	1.03093	ND	1.01051	0.0288712	0.0150907
1023	P53396	20	ACLY_HUMAN ATP-citrate synthase OS=Homo sapiens OX=9606 GN=ACLY PE=1 SV=3	0.97955	1.04252	1.05785	0.96161	1.01038	0.0469588	0.0149016
1024	P84103	74	SRSF3_HUMAN Serine/arginine-rich splicing factor 3 OS=Homo sapiens OX=9606 GN=SRSF3 PE=1 SV=1	ND	ND	1	1.02041	1.01021	0.014432	0.0146481
1025	Q13439	1771	GOGA4_HUMAN Golgin subfamily A member 4 OS=Homo sapiens OX=9606 GN=GOLGA4 PE=1 SV=1	ND	1.0101	1.02041	1	1.01017	0.0102052	0.0145981
1026	Q16637	289	SMN_HUMAN Survival motor neuron protein OS=Homo sapiens OX=9606 GN=SMN1 PE=1 SV=1	ND	1	1.0101	1.02041	1.01017	0.0102052	0.0145981
1027	B4E259	217	B4E259_HUMAN cDNA FLJ59607, moderately similar to D-dopachrome decarboxylase (EC 4.1.1.84) OS=Homo sapiens OX=9606 PE=2 SV=1	ND	ND	ND	1.0101	1.0101		0.0144981
1028	P02533	40	K1C14_HUMAN Keratin, type I cytoskeletal 14 OS=Homo sapiens OX=9606 GN=KRT14 PE=1 SV=4	ND	1.0101	ND	ND	1.0101		0.0144981
1029	P04040	377	CATA_HUMAN Catalase OS=Homo sapiens OX=9606 GN=CAT PE=1 SV=3	ND	1.0101	ND	ND	1.0101		0.0144981
1030	P11586	863	C1TC_HUMAN C-1-tetrahydrofolate synthase, cytoplasmic OS=Homo sapiens OX=9606 GN=MTHFD1 PE=1 SV=3	ND	1.0101	ND	ND	1.0101		0.0144981
1031	P57772	442	SELB_HUMAN Selenocysteine-specific elongation factor OS=Homo sapiens OX=9606 GN=EEFSEC PE=1 SV=4	ND	ND	1.0101	ND	1.0101		0.0144981
1032	Q16875	206	F263_HUMAN 6-phosphofructo-2-kinase/fructose-2,6-bisphosphatase 3 OS=Homo sapiens OX=9606 GN=PFKFB3 PE=1 SV=1	ND	1.0101	ND	ND	1.0101		0.0144981
1033	Q5H9R7	37	PP6R3_HUMAN Serine/threonine-protein phosphatase 6 regulatory subunit 3 OS=Homo sapiens OX=9606 GN=PPP6R3 PE=1 SV=2	ND	1.0101	ND	ND	1.0101		0.0144981
1034	Q5H9R7	844	PP6R3_HUMAN Serine/threonine-protein phosphatase 6 regulatory subunit 3 OS=Homo sapiens OX=9606 GN=PPP6R3 PE=1 SV=2	ND	ND	1.0101	ND	1.0101		0.0144981
1035	Q7L775	337	EPMIP_HUMAN EPM2A-interacting protein 1 OS=Homo sapiens OX=9606 GN=EPM2AIP1 PE=1 SV=1	ND	1.0101	ND	ND	1.0101		0.0144981
1036	Q7Z5K2	344	WAPL_HUMAN Wings apart-like protein homolog OS=Homo sapiens OX=9606 GN=WAPL PE=1 SV=1	ND	ND	1.0101	ND	1.0101		0.0144981
1037	Q86XK2	113	FBX11_HUMAN F-box only protein 11 OS=Homo sapiens OX=9606 GN=FBXO11 PE=1 SV=3	ND	ND	1.0101	ND	1.0101		0.0144981
1038	Q96JP5	115	ZFP91_HUMAN E3 ubiquitin-protein ligase ZFP91 OS=Homo sapiens OX=9606 GN=ZFP91 PE=1 SV=1	1.0101	ND	ND	ND	1.0101		0.0144981
1039	Q9BW27	175	NUP85_HUMAN Nuclear pore complex protein Nup85 OS=Homo sapiens OX=9606 GN=NUP85 PE=1 SV=1	ND	1.0101	ND	ND	1.0101		0.0144981
1040	Q9C0D5	1808	TANC1_HUMAN Protein TANC1 OS=Homo sapiens OX=9606 GN=TANC1 PE=1 SV=3	ND	ND	1.0101	ND	1.0101		0.0144981
1041	Q9H0B6	474	KLC2_HUMAN Kinesin light chain 2 OS=Homo sapiens OX=9606 GN=KLC2 PE=1 SV=1	ND	ND	1.0101	ND	1.0101		0.0144981
1042	Q9H1H9	1443	KI13A_HUMAN Kinesin-like protein KIF13A OS=Homo sapiens OX=9606 GN=KIF13A PE=1 SV=2	ND	ND	ND	1.0101	1.0101		0.0144981
1043	P53384	31	NUBP1_HUMAN Cytosolic Fe-S cluster assembly factor NUBP1 OS=Homo sapiens OX=9606 GN=NUBP1 PE=1 SV=2	1.08696	1.0101	0.96154	0.98039	1.00975	0.0552199	0.0139946	Metal binding	Note=Iron-sulfur 1 (4Fe-4S);Ontology_term=ECO:0000255;evidence=ECO:0000255|HAMAP-Rule:MF_03038
1044	O00411	119	RPOM_HUMAN DNA-directed RNA polymerase, mitochondrial OS=Homo sapiens OX=9606 GN=POLRMT PE=1 SV=2	0.98039	1.04167	1.03572	0.98039	1.00954	0.0337499	0.0137016
1045	P21980	510	TGM2_HUMAN Protein-glutamine gamma-glutamyltransferase 2 OS=Homo sapiens OX=9606 GN=TGM2 PE=1 SV=2	ND	1.14943	0.86957	ND	1.0095	0.197891	0.0136409
1046	Q9C0D5	1611	TANC1_HUMAN Protein TANC1 OS=Homo sapiens OX=9606 GN=TANC1 PE=1 SV=3	ND	ND	0.9434	1.07527	1.00934	0.0932462	0.0134051
1047	Q9UGR2	956	Z3H7B_HUMAN Zinc finger CCCH domain-containing protein 7B OS=Homo sapiens OX=9606 GN=ZC3H7B PE=1 SV=1	1.1236	1.04167	ND	0.86207	1.00911	0.13377	0.0130882
1048	Q14204	1977	DYHC1_HUMAN Cytoplasmic dynein 1 heavy chain 1 OS=Homo sapiens OX=9606 GN=DYNC1H1 PE=1 SV=5	1.0989	1.03777	0.86687	1.03236	1.00897	0.0994256	0.0128904
1049	O96011	153	PX11B_HUMAN Peroxisomal membrane protein 11B OS=Homo sapiens OX=9606 GN=PEX11B PE=1 SV=1	ND	ND	1.03093	0.987	1.00896	0.0310632	0.0128761
1050	H7C048	143	H7C048_HUMAN SWI/SNF-related matrix-associated actin-dependent regulator of chromatin subfamily E member 1 (Fragment) OS=Homo sapiens OX=9606 GN=SMARCE1 PE=1 SV=1	ND	1.14943	1	0.87719	1.00887	0.136337	0.0127451
1051	Q7Z3J2	321	CP062_HUMAN UPF0505 protein C16orf62 OS=Homo sapiens OX=9606 GN=C16orf62 PE=1 SV=2	0.95702	0.85809	ND	1.21014	1.00842	0.181565	0.0120919
1052	P23497	309	SP100_HUMAN Nuclear autoantigen Sp-100 OS=Homo sapiens OX=9606 GN=SP100 PE=1 SV=3	0.9901	0.97087	1.06383	ND	1.00827	0.0490705	0.0118773
1053	P49458	39	SRP09_HUMAN Signal recognition particle 9 kDa protein OS=Homo sapiens OX=9606 GN=SRP9 PE=1 SV=2	0.95256	ND	ND	1.06383	1.00819	0.0786798	0.0117747
1054	Q96MH2	246	HEXI2_HUMAN Protein HEXIM2 OS=Homo sapiens OX=9606 GN=HEXIM2 PE=1 SV=1	1.0101	0.95238	1.1236	0.9434	1.00737	0.0829316	0.0105937
1055	Q9NZM1	275	MYOF_HUMAN Myoferlin OS=Homo sapiens OX=9606 GN=MYOF PE=1 SV=1	1.1236	0.87719	1.02041	ND	1.00707	0.123746	0.0101592
1056	O60763	678	USO1_HUMAN General vesicular transport factor p115 OS=Homo sapiens OX=9606 GN=USO1 PE=1 SV=2	1.03093	0.96871	ND	1.02041	1.00668	0.0333039	0.00960993
1057	Q8IY22	40	CMIP_HUMAN C-Maf-inducing protein OS=Homo sapiens OX=9606 GN=CMIP PE=1 SV=3	0.98077	1.01732	1.02588	1.0001	1.00602	0.0199559	0.0086554
1058	Q14738	17	2A5D_HUMAN Serine/threonine-protein phosphatase 2A 56 kDa regulatory subunit delta isoform OS=Homo sapiens OX=9606 GN=PPP2R5D PE=1 SV=1	1.0101	0.96606	1.04167	ND	1.00594	0.037976	0.00854904
1059	Q9NVZ3	133	NECP2_HUMAN Adaptin ear-binding coat-associated protein 2 OS=Homo sapiens OX=9606 GN=NECAP2 PE=1 SV=1	0.9009	1.01525	1.08696	1.02041	1.00588	0.0772306	0.0084582
1060	P33764	30	S10A3_HUMAN Protein S100-A3 OS=Homo sapiens OX=9606 GN=S100A3 PE=1 SV=1	1.03093	ND	ND	0.98039	1.00566	0.0357372	0.00814263	Disulfide bond&Mutagenesis	Ontology_term=ECO:0000269;evidence=ECO:0000269|PubMed:21377473;Dbxref=PMID:21377473$Note=Abolishes calcium binding%3B when associated with Ala-68. C->A;Ontology_term=ECO:0000269;evidence=ECO:0000269|PubMed:21377473;Dbxref=PMID:21377473
1061	P62280	60	RS11_HUMAN 40S ribosomal protein S11 OS=Homo sapiens OX=9606 GN=RPS11 PE=1 SV=3	0.9529	1.23808	0.86474	0.96634	1.00551	0.161459	0.0079346	Mutagenesis	Note=Abolishes S-acylation. C->S;Ontology_term=ECO:0000269;evidence=ECO:0000269|PubMed:21044946;Dbxref=PMID:21044946
1062	P43246	843	MSH2_HUMAN DNA mismatch repair protein Msh2 OS=Homo sapiens OX=9606 GN=MSH2 PE=1 SV=1	0.9901	ND	ND	1.02041	1.00526	0.0214324	0.00756151
1063	Q16643	96	DREB_HUMAN Drebrin OS=Homo sapiens OX=9606 GN=DBN1 PE=1 SV=4	1.0101	1.0101	0.99505	ND	1.00508	0.00868912	0.00731512	Mutagenesis	Note=Decreased binding to ZMYND8. C->Q;Ontology_term=ECO:0000269;evidence=ECO:0000269|PubMed:28966017;Dbxref=PMID:28966017
1064	O95810	136	CAVN2_HUMAN Caveolae-associated protein 2 OS=Homo sapiens OX=9606 GN=CAVIN2 PE=1 SV=3	ND	ND	1	1.0101	1.00505	0.00714178	0.00726728
1065	P56537	15	IF6_HUMAN Eukaryotic translation initiation factor 6 OS=Homo sapiens OX=9606 GN=EIF6 PE=1 SV=1	ND	1.0101	1	ND	1.00505	0.00714178	0.00726728
1066	Q14684	583	RRP1B_HUMAN Ribosomal RNA processing protein 1 homolog B OS=Homo sapiens OX=9606 GN=RRP1B PE=1 SV=3	ND	1.0101	ND	1	1.00505	0.00714178	0.00726728
1067	Q7Z6J0	107	SH3R1_HUMAN E3 ubiquitin-protein ligase SH3RF1 OS=Homo sapiens OX=9606 GN=SH3RF1 PE=1 SV=2	ND	1.0101	1	ND	1.00505	0.00714178	0.00726728
1068	Q9H425	73	CA198_HUMAN Uncharacterized protein C1orf198 OS=Homo sapiens OX=9606 GN=C1orf198 PE=1 SV=1	ND	1.0101	1	ND	1.00505	0.00714178	0.00726728
1069	Q9UKK3	1047	PARP4_HUMAN Poly [ADP-ribose] polymerase 4 OS=Homo sapiens OX=9606 GN=PARP4 PE=1 SV=3	ND	1	ND	1.0101	1.00505	0.00714178	0.00726728
1070	Q7Z2K6	43	ERMP1_HUMAN Endoplasmic reticulum metallopeptidase 1 OS=Homo sapiens OX=9606 GN=ERMP1 PE=1 SV=2	1.06383	1.04167	0.95589	0.95872	1.00503	0.0558548	0.00723498
1071	Q9BQG0	890	MBB1A_HUMAN Myb-binding protein 1A OS=Homo sapiens OX=9606 GN=MYBBP1A PE=1 SV=2	ND	0.93458	ND	1.07527	1.00493	0.0994829	0.00708783
1072	Q9ULA0	327	DNPEP_HUMAN Aspartyl aminopeptidase OS=Homo sapiens OX=9606 GN=DNPEP PE=1 SV=1	1	1.0101	0.98534	1.02238	1.00446	0.0156887	0.00641293
1073	Q9NXH8	62	TOR4A_HUMAN Torsin-4A OS=Homo sapiens OX=9606 GN=TOR4A PE=1 SV=2	0.88496	1.06383	1.06383	ND	1.00421	0.103271	0.00605621
1074	Q15084	190	PDIA6_HUMAN Protein disulfide-isomerase A6 OS=Homo sapiens OX=9606 GN=PDIA6 PE=1 SV=1	0.98825	1.01996	ND	ND	1.00411	0.0224224	0.00591014	Active site&Disulfide bond&Mutagenesis	Note=Nucleophile;Ontology_term=ECO:0000250;evidence=ECO:0000250$Note=Redox-active;Ontology_term=ECO:0000255;evidence=ECO:0000255|PROSITE-ProRule:PRU00691$Note=25%25 decrease in enzyme activity%3B when associated with S-193. Abolishes enzyme activity%3B when associated with S-55%3B S-58 and S-193. C->S;Ontology_term=ECO:0000269;evidence=ECO:0000269|PubMed:12204115;Dbxref=PMID:12204115
1075	Q7LBC6	569	KDM3B_HUMAN Lysine-specific demethylase 3B OS=Homo sapiens OX=9606 GN=KDM3B PE=1 SV=2	ND	ND	1.0989	0.90909	1.00399	0.134216	0.00575208
1076	Q68CZ2	928	TENS3_HUMAN Tensin-3 OS=Homo sapiens OX=9606 GN=TNS3 PE=1 SV=2	0.98785	0.96761	0.95566	1.10323	1.00359	0.0677439	0.00516641
1077	P42224	492	STAT1_HUMAN Signal transducer and activator of transcription 1-alpha/beta OS=Homo sapiens OX=9606 GN=STAT1 PE=1 SV=2	0.96854	1.03809	1.02428	0.98039	1.00283	0.0335794	0.00406987
1078	Q96HA7	762	TONSL_HUMAN Tonsoku-like protein OS=Homo sapiens OX=9606 GN=TONSL PE=1 SV=2	1.02041	1	1.0101	0.98039	1.00273	0.0170629	0.003926
1079	A0A0A0MTC1	4307	A0A0A0MTC1_HUMAN E3 ubiquitin-protein ligase RNF213 OS=Homo sapiens OX=9606 GN=RNF213 PE=1 SV=1	1.06383	0.96154	1	0.98525	1.00266	0.0437524	0.00382528
1080	P55884	302	EIF3B_HUMAN Eukaryotic translation initiation factor 3 subunit B OS=Homo sapiens OX=9606 GN=EIF3B PE=1 SV=3	ND	1.04167	1.03104	0.93458	1.00243	0.0589997	0.0035015
1081	O75369	2501	FLNB_HUMAN Filamin-B OS=Homo sapiens OX=9606 GN=FLNB PE=1 SV=2	0.93689	1.02353	1.01568	1.03229	1.0021	0.0439979	0.00302288
1082	P35998	236	PRS7_HUMAN 26S proteasome regulatory subunit 7 OS=Homo sapiens OX=9606 GN=PSMC2 PE=1 SV=3	ND	1.1236	0.98039	0.9009	1.00163	0.112859	0.00234968
1083	P20810	661	ICAL_HUMAN Calpastatin OS=Homo sapiens OX=9606 GN=CAST PE=1 SV=4	1.01732	ND	ND	0.98582	1.00157	0.0222739	0.00226326
1084	Q86YS7	867	C2CD5_HUMAN C2 domain-containing protein 5 OS=Homo sapiens OX=9606 GN=C2CD5 PE=1 SV=1	0.93458	0.97856	1.06842	1.02448	1.00151	0.0577665	0.00217683
1085	Q6ZRV2	550	FA83H_HUMAN Protein FAM83H OS=Homo sapiens OX=9606 GN=FAM83H PE=1 SV=3	1.07527	0.91689	0.92754	1.08586	1.00139	0.0916288	0.00200395
1086	P55265	499	DSRAD_HUMAN Double-stranded RNA-specific adenosine deaminase OS=Homo sapiens OX=9606 GN=ADAR PE=1 SV=4	1.02041	0.98039	0.96154	1.04167	1.001	0.0365726	0.00144558
1087	Q7LBC6	1357	KDM3B_HUMAN Lysine-specific demethylase 3B OS=Homo sapiens OX=9606 GN=KDM3B PE=1 SV=2	ND	1.03093	0.91743	1.05263	1.00033	0.0726087	0.000476011
1088	P55265	630	DSRAD_HUMAN Double-stranded RNA-specific adenosine deaminase OS=Homo sapiens OX=9606 GN=ADAR PE=1 SV=4	ND	0.97981	ND	1.02041	1.00011	0.0287085	0.000158688
1089	O43149	612	ZZEF1_HUMAN Zinc finger ZZ-type and EF-hand domain-containing protein 1 OS=Homo sapiens OX=9606 GN=ZZEF1 PE=1 SV=6	ND	1.0101	ND	0.9901	1.0001	0.0141421	0.000144262
1090	Q92598	650	HS105_HUMAN Heat shock protein 105 kDa OS=Homo sapiens OX=9606 GN=HSPH1 PE=1 SV=1	ND	ND	0.9901	1.0101	1.0001	0.0141421	0.000144262
1091	Q9Y2K1	126	ZBTB1_HUMAN Zinc finger and BTB domain-containing protein 1 OS=Homo sapiens OX=9606 GN=ZBTB1 PE=1 SV=3	ND	1	1.0101	0.9901	1.00007	0.0100002	9.61765e-05
1092	O60292	1775	SI1L3_HUMAN Signal-induced proliferation-associated 1-like protein 3 OS=Homo sapiens OX=9606 GN=SIPA1L3 PE=1 SV=3	ND	1	ND	ND	1		0
1093	O95825	302	QORL1_HUMAN Quinone oxidoreductase-like protein 1 OS=Homo sapiens OX=9606 GN=CRYZL1 PE=1 SV=2	1	ND	ND	ND	1		0
1094	P24752	413	THIL_HUMAN Acetyl-CoA acetyltransferase, mitochondrial OS=Homo sapiens OX=9606 GN=ACAT1 PE=1 SV=1	ND	1	ND	ND	1		0	Active site	Note=Proton donor/acceptor;Ontology_term=ECO:0000305;evidence=ECO:0000305|PubMed:17371050;Dbxref=PMID:17371050
1095	P42677	77	RS27_HUMAN 40S ribosomal protein S27 OS=Homo sapiens OX=9606 GN=RPS27 PE=1 SV=3	ND	1	ND	ND	1		0
1096	P49441	10	INPP_HUMAN Inositol polyphosphate 1-phosphatase OS=Homo sapiens OX=9606 GN=INPP1 PE=1 SV=1	ND	1	ND	ND	1		0
1097	Q13618	464	CUL3_HUMAN Cullin-3 OS=Homo sapiens OX=9606 GN=CUL3 PE=1 SV=2	ND	ND	ND	1	1		0
1098	Q14155	668	ARHG7_HUMAN Rho guanine nucleotide exchange factor 7 OS=Homo sapiens OX=9606 GN=ARHGEF7 PE=1 SV=2	ND	ND	1	ND	1		0
1099	Q641Q2	594	WAC2A_HUMAN WASH complex subunit 2A OS=Homo sapiens OX=9606 GN=WASHC2A PE=1 SV=3	ND	1	ND	ND	1		0
1100	Q7Z5J4	790	RAI1_HUMAN Retinoic acid-induced protein 1 OS=Homo sapiens OX=9606 GN=RAI1 PE=1 SV=2	ND	ND	1	ND	1		0
1101	Q86U44	336	MTA70_HUMAN N6-adenosine-methyltransferase catalytic subunit OS=Homo sapiens OX=9606 GN=METTL3 PE=1 SV=2	ND	ND	1	ND	1		0
1102	Q96EV8	302	DTBP1_HUMAN Dysbindin OS=Homo sapiens OX=9606 GN=DTNBP1 PE=1 SV=1	ND	1	ND	ND	1		0
1103	Q9H5Q4	383	TFB2M_HUMAN Dimethyladenosine transferase 2, mitochondrial OS=Homo sapiens OX=9606 GN=TFB2M PE=1 SV=1	ND	ND	1	ND	1		0
1104	Q9NUQ3	480	TXLNG_HUMAN Gamma-taxilin OS=Homo sapiens OX=9606 GN=TXLNG PE=1 SV=2	ND	1	ND	ND	1		0
1105	Q9P2B7	504	CFA97_HUMAN Cilia- and flagella-associated protein 97 OS=Homo sapiens OX=9606 GN=CFAP97 PE=1 SV=2	ND	ND	1	ND	1		0
1106	Q86YV5	612	PRAG1_HUMAN Inactive tyrosine-protein kinase PRAG1 OS=Homo sapiens OX=9606 GN=PRAG1 PE=1 SV=4	0.93458	ND	1.07023	0.99393	0.99958	0.0680013	-0.000606059
1107	Q86Y79	20	PTH_HUMAN Probable peptidyl-tRNA hydrolase OS=Homo sapiens OX=9606 GN=PTRH1 PE=1 SV=1	0.97087	1.04167	1.0006	0.98369	0.999208	0.0308156	-0.00114379
1108	A6NED2	139	RCCD1_HUMAN RCC1 domain-containing protein 1 OS=Homo sapiens OX=9606 GN=RCCD1 PE=1 SV=1	0.99032	1.00433	0.99158	1.01015	0.999095	0.00971415	-0.00130623
1109	Q14247	112	SRC8_HUMAN Src substrate cortactin OS=Homo sapiens OX=9606 GN=CTTN PE=1 SV=2	1.03655	0.98309	0.98039	0.99515	0.998795	0.0259751	-0.0017395
1110	Q8NFC6	2570	BD1L1_HUMAN Biorientation of chromosomes in cell division protein 1-like 1 OS=Homo sapiens OX=9606 GN=BOD1L1 PE=1 SV=2	0.95238	0.9901	ND	1.05263	0.99837	0.0506341	-0.00235351
1111	Q9HD20	18	AT131_HUMAN Manganese-transporting ATPase 13A1 OS=Homo sapiens OX=9606 GN=ATP13A1 PE=1 SV=2	0.9934	1.00238	1.00673	0.9901	0.998152	0.00772171	-0.00266784
1112	Q14980	80	NUMA1_HUMAN Nuclear mitotic apparatus protein 1 OS=Homo sapiens OX=9606 GN=NUMA1 PE=1 SV=2	1.02041	0.92031	0.91743	1.13291	0.997765	0.102029	-0.00322803
1113	Q9C0C9	375	UBE2O_HUMAN (E3-independent) E2 ubiquitin-conjugating enzyme OS=Homo sapiens OX=9606 GN=UBE2O PE=1 SV=3	ND	1.01807	0.97405	1	0.997373	0.0221272	-0.00379446
1114	Q53H82	100	LACB2_HUMAN Endoribonuclease LACTB2 OS=Homo sapiens OX=9606 GN=LACTB2 PE=1 SV=2	ND	0.893	1.0989	1	0.9973	0.102977	-0.00390054
1115	Q9BTY7	51	HGH1_HUMAN Protein HGH1 homolog OS=Homo sapiens OX=9606 GN=HGH1 PE=1 SV=1	1	0.88351	0.92795	1.17647	0.996983	0.128927	-0.00435991
1116	Q8IY81	577	SPB1_HUMAN pre-rRNA processing protein FTSJ3 OS=Homo sapiens OX=9606 GN=FTSJ3 PE=1 SV=2	0.97986	1.01547	1.03099	0.96103	0.996838	0.0320623	-0.00456975
1117	Q13671	284	RIN1_HUMAN Ras and Rab interactor 1 OS=Homo sapiens OX=9606 GN=RIN1 PE=1 SV=4	0.97087	0.9434	1.07527	ND	0.996513	0.0695745	-0.00503899
1118	Q9BU76	58	MMTA2_HUMAN Multiple myeloma tumor-associated protein 2 OS=Homo sapiens OX=9606 GN=MMTAG2 PE=1 SV=1	1.0101	1.0101	0.95543	1.0101	0.996432	0.027335	-0.00515602
1119	Q8IZD4	291	DCP1B_HUMAN mRNA-decapping enzyme 1B OS=Homo sapiens OX=9606 GN=DCP1B PE=1 SV=2	ND	0.89286	ND	1.0989	0.99588	0.145692	-0.00595618
1120	P59051	98	BRAS2_HUMAN Putative uncharacterized protein encoded by BRWD1-AS2 OS=Homo sapiens OX=9606 GN=BRWD1-AS2 PE=5 SV=1	ND	1.0101	ND	0.98039	0.995245	0.0210081	-0.00687638
1121	Q9Y6K5	648	OAS3_HUMAN 2'-5'-oligoadenylate synthase 3 OS=Homo sapiens OX=9606 GN=OAS3 PE=1 SV=3	ND	0.9901	ND	1	0.99505	0.00700036	-0.00715907
1122	Q8N2G8	82	GHDC_HUMAN GH3 domain-containing protein OS=Homo sapiens OX=9606 GN=GHDC PE=1 SV=2	0.96154	1.07554	0.90909	1.03093	0.994275	0.0736561	-0.00828316
1123	P07199	135	CENPB_HUMAN Major centromere autoantigen B OS=Homo sapiens OX=9606 GN=CENPB PE=1 SV=2	0.86957	1.03093	0.92593	1.15003	0.994115	0.123593	-0.00851534
1124	O75391	191	SPAG7_HUMAN Sperm-associated antigen 7 OS=Homo sapiens OX=9606 GN=SPAG7 PE=1 SV=2	ND	ND	1.0989	0.88905	0.993975	0.148386	-0.00871853
1125	P55060	939	XPO2_HUMAN Exportin-2 OS=Homo sapiens OX=9606 GN=CSE1L PE=1 SV=3	1.02041	0.9901	ND	0.97087	0.993793	0.0249757	-0.00898223
1126	O60841	853	IF2P_HUMAN Eukaryotic translation initiation factor 5B OS=Homo sapiens OX=9606 GN=EIF5B PE=1 SV=4	ND	0.96154	1.02567	ND	0.993605	0.0453468	-0.00925566
1127	Q9BTE3	325	MCMBP_HUMAN Mini-chromosome maintenance complex-binding protein OS=Homo sapiens OX=9606 GN=MCMBP PE=1 SV=2	0.95186	0.95238	0.92168	1.14838	0.993575	0.104196	-0.00929922
1128	P60842	134	IF4A1_HUMAN Eukaryotic initiation factor 4A-I OS=Homo sapiens OX=9606 GN=EIF4A1 PE=1 SV=1	ND	1.0101	0.9901	0.98039	0.99353	0.0151491	-0.00936456
1129	Q9ULD2	492	MTUS1_HUMAN Microtubule-associated tumor suppressor 1 OS=Homo sapiens OX=9606 GN=MTUS1 PE=1 SV=2	1.01031	0.96475	0.98369	1.01361	0.99309	0.0231597	-0.0100036
1130	P61221	88	ABCE1_HUMAN ATP-binding cassette sub-family E member 1 OS=Homo sapiens OX=9606 GN=ABCE1 PE=1 SV=1	1.0101	ND	0.96825	1.0009	0.993083	0.0219927	-0.0100133
1131	O15228	66	GNPAT_HUMAN Dihydroxyacetone phosphate acyltransferase OS=Homo sapiens OX=9606 GN=GNPAT PE=1 SV=1	ND	0.9434	1.04167	ND	0.992535	0.0694874	-0.0108101
1132	P48200	620	IREB2_HUMAN Iron-responsive element-binding protein 2 OS=Homo sapiens OX=9606 GN=IREB2 PE=1 SV=3	0.9434	1.04167	ND	ND	0.992535	0.0694874	-0.0108101
1133	Q9NZB2	279	F120A_HUMAN Constitutive coactivator of PPAR-gamma-like protein 1 OS=Homo sapiens OX=9606 GN=FAM120A PE=1 SV=2	0.93726	1.00624	1.04898	0.97691	0.992347	0.0471635	-0.0110827
1134	Q9UGI8	196	TES_HUMAN Testin OS=Homo sapiens OX=9606 GN=TES PE=1 SV=1	0.96154	1.03093	0.93458	1.04167	0.99218	0.0523049	-0.0113262
1135	O00443	669	P3C2A_HUMAN Phosphatidylinositol 4-phosphate 3-kinase C2 domain-containing subunit alpha OS=Homo sapiens OX=9606 GN=PIK3C2A PE=1 SV=2	ND	1.07527	0.90909	ND	0.99218	0.117507	-0.0113262
1136	Q9BYT8	256	NEUL_HUMAN Neurolysin, mitochondrial OS=Homo sapiens OX=9606 GN=NLN PE=1 SV=1	ND	0.90909	1.07527	ND	0.99218	0.117507	-0.0113262
1137	Q6P1X6	98	CH082_HUMAN UPF0598 protein C8orf82 OS=Homo sapiens OX=9606 GN=C8orf82 PE=1 SV=2	ND	0.88496	1.0989	ND	0.99193	0.151278	-0.0116898
1138	Q8N4X5	467	AF1L2_HUMAN Actin filament-associated protein 1-like 2 OS=Homo sapiens OX=9606 GN=AFAP1L2 PE=1 SV=1	ND	0.84034	1.14312	ND	0.99173	0.214098	-0.0119807
1139	O00567	142	NOP56_HUMAN Nucleolar protein 56 OS=Homo sapiens OX=9606 GN=NOP56 PE=1 SV=4	ND	0.96154	0.92593	1.08696	0.991477	0.0845862	-0.0123493
1140	Q86UY0	17	Q86UY0_HUMAN TXNDC5 protein OS=Homo sapiens OX=9606 GN=TXNDC5 PE=1 SV=1	1.00802	0.96172	0.99055	1.00525	0.991385	0.0212106	-0.0124827
1141	Q92888	537	ARHG1_HUMAN Rho guanine nucleotide exchange factor 1 OS=Homo sapiens OX=9606 GN=ARHGEF1 PE=1 SV=2	0.97722	0.88496	1.10303	1	0.991302	0.0895651	-0.0126027
1142	O15355	164	PPM1G_HUMAN Protein phosphatase 1G OS=Homo sapiens OX=9606 GN=PPM1G PE=1 SV=1	ND	0.95887	1.03704	0.97749	0.991133	0.0408319	-0.0128489
1143	O60716	618	CTND1_HUMAN Catenin delta-1 OS=Homo sapiens OX=9606 GN=CTNND1 PE=1 SV=1	1.05263	0.90909	1.05042	0.95238	0.99113	0.0719483	-0.0128538
1144	Q96BY6	2164	DOC10_HUMAN Dedicator of cytokinesis protein 10 OS=Homo sapiens OX=9606 GN=DOCK10 PE=1 SV=3	0.9901	0.97087	0.96154	1.04167	0.991045	0.0357834	-0.0129775
1145	A0A0A0MTC1	134	A0A0A0MTC1_HUMAN E3 ubiquitin-protein ligase RNF213 OS=Homo sapiens OX=9606 GN=RNF213 PE=1 SV=1	ND	0.96154	ND	1.02041	0.990975	0.0416274	-0.0130794
1146	P51610	1872	HCFC1_HUMAN Host cell factor 1 OS=Homo sapiens OX=9606 GN=HCFC1 PE=1 SV=2	ND	1.02041	0.96154	ND	0.990975	0.0416274	-0.0130794
1147	Q9Y2U8	108	MAN1_HUMAN Inner nuclear membrane protein Man1 OS=Homo sapiens OX=9606 GN=LEMD3 PE=1 SV=2	0.97087	1.0101	ND	ND	0.990485	0.0277398	-0.013793
1148	Q9UPU7	726	TBD2B_HUMAN TBC1 domain family member 2B OS=Homo sapiens OX=9606 GN=TBC1D2B PE=1 SV=2	ND	1.00251	1.03431	0.93458	0.990467	0.0509441	-0.0138197
1149	O95336	32	6PGL_HUMAN 6-phosphogluconolactonase OS=Homo sapiens OX=9606 GN=PGLS PE=1 SV=2	0.99569	0.96418	1.02519	0.97652	0.990395	0.0265736	-0.0139241
1150	Q86W56	397	PARG_HUMAN Poly(ADP-ribose) glycohydrolase OS=Homo sapiens OX=9606 GN=PARG PE=1 SV=1	ND	0.95816	1.04167	0.97087	0.990233	0.0449965	-0.0141596
1151	P35573	608	GDE_HUMAN Glycogen debranching enzyme OS=Homo sapiens OX=9606 GN=AGL PE=1 SV=3	ND	ND	1	0.98039	0.990195	0.0138664	-0.0142154
1152	Q9UG56	181	PISD_HUMAN Phosphatidylserine decarboxylase proenzyme, mitochondrial OS=Homo sapiens OX=9606 GN=PISD PE=2 SV=4	ND	ND	1	0.98039	0.990195	0.0138664	-0.0142154
1153	Q9NY93	518	DDX56_HUMAN Probable ATP-dependent RNA helicase DDX56 OS=Homo sapiens OX=9606 GN=DDX56 PE=1 SV=1	ND	0.9901	0.98039	1	0.990163	0.00980515	-0.0142616
1154	O00267	740	SPT5H_HUMAN Transcription elongation factor SPT5 OS=Homo sapiens OX=9606 GN=SUPT5H PE=1 SV=1	ND	ND	0.9901	ND	0.9901		-0.0143539
1155	O96028	38	NSD2_HUMAN Histone-lysine N-methyltransferase NSD2 OS=Homo sapiens OX=9606 GN=NSD2 PE=1 SV=1	0.9901	ND	ND	ND	0.9901		-0.0143539
1156	P35869	639	AHR_HUMAN Aryl hydrocarbon receptor OS=Homo sapiens OX=9606 GN=AHR PE=1 SV=2	ND	ND	ND	0.9901	0.9901		-0.0143539
1157	Q05209	343	PTN12_HUMAN Tyrosine-protein phosphatase non-receptor type 12 OS=Homo sapiens OX=9606 GN=PTPN12 PE=1 SV=3	ND	ND	0.9901	ND	0.9901		-0.0143539
1158	Q6FI81	285	CPIN1_HUMAN Anamorsin OS=Homo sapiens OX=9606 GN=CIAPIN1 PE=1 SV=2	0.9901	ND	ND	ND	0.9901		-0.0143539	Metal binding	Note=Iron-sulfur (4Fe-4S);Ontology_term=ECO:0000255;evidence=ECO:0000255|HAMAP-Rule:MF_03115
1159	Q8IY22	363	CMIP_HUMAN C-Maf-inducing protein OS=Homo sapiens OX=9606 GN=CMIP PE=1 SV=3	ND	ND	0.9901	ND	0.9901		-0.0143539
1160	Q9H792	1437	PEAK1_HUMAN Inactive tyrosine-protein kinase PEAK1 OS=Homo sapiens OX=9606 GN=PEAK1 PE=1 SV=4	ND	0.9901	ND	ND	0.9901		-0.0143539
1161	Q9Y490	1506	TLN1_HUMAN Talin-1 OS=Homo sapiens OX=9606 GN=TLN1 PE=1 SV=3	ND	0.9901	ND	ND	0.9901		-0.0143539
1162	Q8TB45	247	DPTOR_HUMAN DEP domain-containing mTOR-interacting protein OS=Homo sapiens OX=9606 GN=DEPTOR PE=1 SV=2	ND	1.08696	0.89286	ND	0.98991	0.137249	-0.0146307
1163	P41227	194	NAA10_HUMAN N-alpha-acetyltransferase 10 OS=Homo sapiens OX=9606 GN=NAA10 PE=1 SV=1	0.9529	0.9869	1.03368	0.98509	0.989642	0.0332544	-0.0150206
1164	P49327	2202	FAS_HUMAN Fatty acid synthase OS=Homo sapiens OX=9606 GN=FASN PE=1 SV=3	0.96154	1	1.0101	0.98544	0.98927	0.0210764	-0.0155638
1165	A0A024R3X1	214	A0A024R3X1_HUMAN Galectin OS=Homo sapiens OX=9606 GN=LGALS8 PE=4 SV=1	1.09632	0.87719	ND	0.99299	0.988833	0.109624	-0.0162007
1166	P50995	384	ANX11_HUMAN Annexin A11 OS=Homo sapiens OX=9606 GN=ANXA11 PE=1 SV=1	1.0101	0.98039	1.02041	0.9434	0.988575	0.0345667	-0.0165777
1167	Q96KB5	70	TOPK_HUMAN Lymphokine-activated killer T-cell-originated protein kinase OS=Homo sapiens OX=9606 GN=PBK PE=1 SV=3	0.96154	0.97587	1.04575	0.96782	0.987745	0.0391122	-0.0177895
1168	Q14966	747	ZN638_HUMAN Zinc finger protein 638 OS=Homo sapiens OX=9606 GN=ZNF638 PE=1 SV=2	1	0.98039	0.9901	0.98039	0.98772	0.00937942	-0.017826
1169	Q9Y6G5	132	COMDA_HUMAN COMM domain-containing protein 10 OS=Homo sapiens OX=9606 GN=COMMD10 PE=1 SV=1	0.9434	0.97563	1	1.03093	0.98749	0.037095	-0.018162
1170	Q96SW2	366	CRBN_HUMAN Protein cereblon OS=Homo sapiens OX=9606 GN=CRBN PE=1 SV=1	1.03093	0.9434	ND	ND	0.987165	0.0618931	-0.0186369
1171	Q9NVV4	32	PAPD1_HUMAN Poly(A) RNA polymerase, mitochondrial OS=Homo sapiens OX=9606 GN=MTPAP PE=1 SV=1	0.90909	1.00628	1.06763	0.96523	0.987058	0.066875	-0.018794
1172	Q8WWH5	331	TRUB1_HUMAN Probable tRNA pseudouridine synthase 1 OS=Homo sapiens OX=9606 GN=TRUB1 PE=1 SV=1	ND	0.9901	0.9901	0.98039	0.986863	0.00560607	-0.0190778
1173	Q9Y5A7	270	NUB1_HUMAN NEDD8 ultimate buster 1 OS=Homo sapiens OX=9606 GN=NUB1 PE=1 SV=2	ND	0.9901	0.98039	0.9901	0.986863	0.00560607	-0.0190778
1174	Q9BX95	76	SGPP1_HUMAN Sphingosine-1-phosphate phosphatase 1 OS=Homo sapiens OX=9606 GN=SGPP1 PE=1 SV=2	1.00407	1	0.98039	0.96154	0.9865	0.0195899	-0.019609
1175	Q5M775	470	CYTSB_HUMAN Cytospin-B OS=Homo sapiens OX=9606 GN=SPECC1 PE=1 SV=1	ND	ND	0.88496	1.08696	0.98596	0.142836	-0.020399
1176	Q59FP7	1465	Q59FP7_HUMAN DNA (Cytosine-5-)-methyltransferase 1 variant (Fragment) OS=Homo sapiens OX=9606 PE=2 SV=1	ND	1.0101	ND	0.96154	0.98582	0.0343371	-0.0206038
1177	Q63ZY3	562	KANK2_HUMAN KN motif and ankyrin repeat domain-containing protein 2 OS=Homo sapiens OX=9606 GN=KANK2 PE=1 SV=1	0.96154	ND	1.0101	ND	0.98582	0.0343371	-0.0206038
1178	P21291	58	CSRP1_HUMAN Cysteine and glycine-rich protein 1 OS=Homo sapiens OX=9606 GN=CSRP1 PE=1 SV=3	0.92593	1.03093	ND	1	0.98562	0.0539568	-0.0208966
1179	O00244	41	ATOX1_HUMAN Copper transport protein ATOX1 OS=Homo sapiens OX=9606 GN=ATOX1 PE=1 SV=1	1.1236	0.84746	ND	ND	0.98553	0.19526	-0.0210283
1180	Q8NFG4	454	FLCN_HUMAN Folliculin OS=Homo sapiens OX=9606 GN=FLCN PE=1 SV=1	ND	0.84746	1.1236	ND	0.98553	0.19526	-0.0210283
1181	Q86YV5	912	PRAG1_HUMAN Inactive tyrosine-protein kinase PRAG1 OS=Homo sapiens OX=9606 GN=PRAG1 PE=1 SV=4	ND	1	ND	0.97087	0.985435	0.020598	-0.0211674
1182	Q92598	658	HS105_HUMAN Heat shock protein 105 kDa OS=Homo sapiens OX=9606 GN=HSPH1 PE=1 SV=1	0.99249	1.0101	1.03044	0.90565	0.98467	0.0549148	-0.0222878
1183	Q12789	286	TF3C1_HUMAN General transcription factor 3C polypeptide 1 OS=Homo sapiens OX=9606 GN=GTF3C1 PE=1 SV=4	0.9967	0.95455	0.98716	1.0001	0.984627	0.0207863	-0.0223501
1184	P47897	657	SYQ_HUMAN Glutamine--tRNA ligase OS=Homo sapiens OX=9606 GN=QARS PE=1 SV=1	0.96154	0.89027	0.98639	1.0989	0.984275	0.0865971	-0.0228666
1185	Q9NPR2	748	SEM4B_HUMAN Semaphorin-4B OS=Homo sapiens OX=9606 GN=SEMA4B PE=1 SV=3	ND	0.9901	1.0101	0.95238	0.984193	0.0293098	-0.0229864
1186	Q96LB3	53	IFT74_HUMAN Intraflagellar transport protein 74 homolog OS=Homo sapiens OX=9606 GN=IFT74 PE=1 SV=1	0.92593	1.05263	0.94789	1.0101	0.984137	0.0579289	-0.0230682
1187	A0A024R9D8	779	A0A024R9D8_HUMAN Sperm associated antigen 1, isoform CRA_b OS=Homo sapiens OX=9606 GN=SPAG1 PE=4 SV=1	ND	0.95238	1	1	0.984127	0.0274934	-0.0230841
1188	Q96BF6	393	NACC2_HUMAN Nucleus accumbens-associated protein 2 OS=Homo sapiens OX=9606 GN=NACC2 PE=1 SV=1	0.91743	0.98686	1.04167	0.9901	0.984015	0.0509993	-0.0232478
1189	Q92754	209	AP2C_HUMAN Transcription factor AP-2 gamma OS=Homo sapiens OX=9606 GN=TFAP2C PE=1 SV=1	ND	0.97087	1.0101	0.97087	0.983947	0.0226495	-0.023348
1190	Q9HC52	261	CBX8_HUMAN Chromobox protein homolog 8 OS=Homo sapiens OX=9606 GN=CBX8 PE=1 SV=3	1.0989	1	0.89286	0.9434	0.98379	0.0883416	-0.0235777
1191	Q9BT17	23	MTG1_HUMAN Mitochondrial ribosome-associated GTPase 1 OS=Homo sapiens OX=9606 GN=MTG1 PE=1 SV=2	ND	0.98039	0.97087	1	0.983753	0.0148534	-0.0236315
1192	O00443	514	P3C2A_HUMAN Phosphatidylinositol 4-phosphate 3-kinase C2 domain-containing subunit alpha OS=Homo sapiens OX=9606 GN=PIK3C2A PE=1 SV=2	0.9901	0.97087	0.9901	ND	0.98369	0.0111024	-0.0237244
1193	Q5VT06	2956	CE350_HUMAN Centrosome-associated protein 350 OS=Homo sapiens OX=9606 GN=CEP350 PE=1 SV=1	ND	1.06383	0.93458	0.95238	0.983597	0.0700518	-0.0238612
1194	P29372	56	3MG_HUMAN DNA-3-methyladenine glycosylase OS=Homo sapiens OX=9606 GN=MPG PE=1 SV=3	ND	1.19048	0.86957	0.89065	0.983567	0.179502	-0.0239053
1195	P21796	232	VDAC1_HUMAN Voltage-dependent anion-selective channel protein 1 OS=Homo sapiens OX=9606 GN=VDAC1 PE=1 SV=2	0.97675	ND	0.9901	ND	0.983425	0.00943988	-0.0241131
1196	P09038	211	FGF2_HUMAN Fibroblast growth factor 2 OS=Homo sapiens OX=9606 GN=FGF2 PE=1 SV=3	ND	0.97087	1.05263	0.92593	0.983143	0.0642355	-0.0245263
1197	Q9P287	213	BCCIP_HUMAN BRCA2 and CDKN1A-interacting protein OS=Homo sapiens OX=9606 GN=BCCIP PE=1 SV=1	0.98314	ND	ND	ND	0.98314		-0.0245312
1198	Q9Y2U8	754	MAN1_HUMAN Inner nuclear membrane protein Man1 OS=Homo sapiens OX=9606 GN=LEMD3 PE=1 SV=2	ND	0.92923	0.96154	1.05847	0.98308	0.0672586	-0.0246193
1199	Q32MZ4	750	LRRF1_HUMAN Leucine-rich repeat flightless-interacting protein 1 OS=Homo sapiens OX=9606 GN=LRRFIP1 PE=1 SV=2	0.99564	0.98211	ND	0.97047	0.98274	0.0125968	-0.0251183
1200	P49915	456	GUAA_HUMAN GMP synthase [glutamine-hydrolyzing] OS=Homo sapiens OX=9606 GN=GMPS PE=1 SV=1	1.01546	0.96171	ND	0.97087	0.98268	0.0287554	-0.0252064
1201	Q92841	584	DDX17_HUMAN Probable ATP-dependent RNA helicase DDX17 OS=Homo sapiens OX=9606 GN=DDX17 PE=1 SV=2	ND	0.96154	1.07527	0.90909	0.981967	0.0849522	-0.026254
1202	A0A024R358	27	A0A024R358_HUMAN HCG2000301, isoform CRA_a OS=Homo sapiens OX=9606 GN=hCG_2000301 PE=4 SV=1	ND	0.96234	1.01735	0.96591	0.981867	0.0307813	-0.026401
1203	B7Z4B7	10	B7Z4B7_HUMAN cDNA FLJ52561, highly similar to Four and a half LIM domains protein 1 OS=Homo sapiens OX=9606 PE=2 SV=1	ND	1.01051	1.04167	0.89286	0.98168	0.0784824	-0.0266753
1204	Q99700	892	ATX2_HUMAN Ataxin-2 OS=Homo sapiens OX=9606 GN=ATXN2 PE=1 SV=2	1.03093	0.96154	0.9434	0.9901	0.981492	0.0381545	-0.0269509
1205	Q92545	1747	TM131_HUMAN Transmembrane protein 131 OS=Homo sapiens OX=9606 GN=TMEM131 PE=1 SV=3	0.95238	0.97087	ND	1.02041	0.98122	0.0351762	-0.0273515
1206	P04080	3	CYTB_HUMAN Cystatin-B OS=Homo sapiens OX=9606 GN=CSTB PE=1 SV=2	0.99542	0.94959	1.03208	0.94668	0.980943	0.0407494	-0.0277595
1207	Q14151	672	SAFB2_HUMAN Scaffold attachment factor B2 OS=Homo sapiens OX=9606 GN=SAFB2 PE=1 SV=1	0.9901	ND	0.95238	1	0.980827	0.0251279	-0.0279299
1208	Q5VYS8	343	TUT7_HUMAN Terminal uridylyltransferase 7 OS=Homo sapiens OX=9606 GN=TUT7 PE=1 SV=1	ND	0.9901	0.97087	ND	0.980485	0.0135977	-0.0284325
1209	O94804	888	STK10_HUMAN Serine/threonine-protein kinase 10 OS=Homo sapiens OX=9606 GN=STK10 PE=1 SV=1	ND	0.98039	ND	ND	0.98039		-0.0285723
1210	P07814	92	SYEP_HUMAN Bifunctional glutamate/proline--tRNA ligase OS=Homo sapiens OX=9606 GN=EPRS PE=1 SV=5	ND	0.98039	ND	ND	0.98039		-0.0285723
1211	P11717	2342	MPRI_HUMAN Cation-independent mannose-6-phosphate receptor OS=Homo sapiens OX=9606 GN=IGF2R PE=1 SV=3	ND	ND	0.98039	ND	0.98039		-0.0285723	Disulfide bond	Ontology_term=ECO:0000255;evidence=ECO:0000255|PROSITE-ProRule:PRU00479
1212	P29401	225	TKT_HUMAN Transketolase OS=Homo sapiens OX=9606 GN=TKT PE=1 SV=3	ND	0.98039	ND	0.98039	0.98039	0	-0.0285723
1213	P43007	500	SATT_HUMAN Neutral amino acid transporter A OS=Homo sapiens OX=9606 GN=SLC1A4 PE=1 SV=1	ND	0.98039	ND	ND	0.98039		-0.0285723
1214	P46013	1285	KI67_HUMAN Proliferation marker protein Ki-67 OS=Homo sapiens OX=9606 GN=MKI67 PE=1 SV=2	ND	ND	ND	0.98039	0.98039		-0.0285723
1215	Q15723	348	ELF2_HUMAN ETS-related transcription factor Elf-2 OS=Homo sapiens OX=9606 GN=ELF2 PE=1 SV=2	ND	0.98039	ND	ND	0.98039		-0.0285723
1216	Q5TH69	307	BIG3_HUMAN Brefeldin A-inhibited guanine nucleotide-exchange protein 3 OS=Homo sapiens OX=9606 GN=ARFGEF3 PE=1 SV=3	ND	0.98039	ND	ND	0.98039		-0.0285723
1217	Q8NDB6	131	FA156_HUMAN Protein FAM156A/FAM156B OS=Homo sapiens OX=9606 GN=FAM156A PE=1 SV=1	ND	ND	0.98039	ND	0.98039		-0.0285723
1218	Q93008	1237	USP9X_HUMAN Probable ubiquitin carboxyl-terminal hydrolase FAF-X OS=Homo sapiens OX=9606 GN=USP9X PE=1 SV=3	ND	0.98039	ND	ND	0.98039		-0.0285723
1219	Q96RS6	376	NUDC1_HUMAN NudC domain-containing protein 1 OS=Homo sapiens OX=9606 GN=NUDCD1 PE=1 SV=2	ND	ND	0.98039	ND	0.98039		-0.0285723
1220	Q9UGU0	1328	TCF20_HUMAN Transcription factor 20 OS=Homo sapiens OX=9606 GN=TCF20 PE=1 SV=3	ND	ND	0.98039	ND	0.98039		-0.0285723
1221	Q06830	173	PRDX1_HUMAN Peroxiredoxin-1 OS=Homo sapiens OX=9606 GN=PRDX1 PE=1 SV=1	0.9198	0.88019	1.2142	0.90589	0.98002	0.15698	-0.0291169	Disulfide bond	Note=Interchain (with C-52)%3B in linked form;Ontology_term=ECO:0000244,ECO:0000269;evidence=ECO:0000244|PDB:4XCS,ECO:0000269|Ref.31
1222	Q9UMS0	213	NFU1_HUMAN NFU1 iron-sulfur cluster scaffold homolog, mitochondrial OS=Homo sapiens OX=9606 GN=NFU1 PE=1 SV=2	0.90914	0.9901	1.11111	0.90909	0.97986	0.0954658	-0.0293525	Metal binding	Note=Iron-sulfur (4Fe-4S)%3B shared with dimeric partner;Ontology_term=ECO:0000305;evidence=ECO:0000305|PubMed:27818104;Dbxref=PMID:27818104
1223	O95163	341	ELP1_HUMAN Elongator complex protein 1 OS=Homo sapiens OX=9606 GN=ELP1 PE=1 SV=3	1.19048	0.76923	ND	ND	0.979855	0.297869	-0.0293598
1224	O00487	238	PSDE_HUMAN 26S proteasome non-ATPase regulatory subunit 14 OS=Homo sapiens OX=9606 GN=PSMD14 PE=1 SV=1	0.93458	0.81229	0.78125	1.38889	0.979252	0.280998	-0.0302472
1225	Q9NP81	66	SYSM_HUMAN Serine--tRNA ligase, mitochondrial OS=Homo sapiens OX=9606 GN=SARS2 PE=1 SV=1	0.95238	0.9901	ND	0.99447	0.978983	0.0231425	-0.0306438
1226	Q8NDZ2	683	SIMC1_HUMAN SUMO-interacting motif-containing protein 1 OS=Homo sapiens OX=9606 GN=SIMC1 PE=1 SV=3	ND	0.96154	1.03093	0.9434	0.978623	0.046198	-0.0311744
1227	A0A087X106	384	A0A087X106_HUMAN Keratin, type II cuticular Hb1 OS=Homo sapiens OX=9606 GN=KRT81 PE=1 SV=1	ND	ND	1.00416	0.95238	0.97827	0.036614	-0.0316954
1228	P00492	106	HPRT_HUMAN Hypoxanthine-guanine phosphoribosyltransferase OS=Homo sapiens OX=9606 GN=HPRT1 PE=1 SV=2	ND	0.9901	0.93458	1.0101	0.97826	0.0391274	-0.0317101
1229	Q01850	331	CDR2_HUMAN Cerebellar degeneration-related protein 2 OS=Homo sapiens OX=9606 GN=CDR2 PE=1 SV=2	ND	0.97538	0.98039	ND	0.977885	0.0035426	-0.0322633
1230	Q8NDX5	816	PHC3_HUMAN Polyhomeotic-like protein 3 OS=Homo sapiens OX=9606 GN=PHC3 PE=1 SV=1	ND	1.00337	ND	0.95238	0.977875	0.0360554	-0.032278
1231	P52209	289	6PGD_HUMAN 6-phosphogluconate dehydrogenase, decarboxylating OS=Homo sapiens OX=9606 GN=PGD PE=1 SV=3	1.06431	0.9282	1.02567	0.89286	0.97776	0.0805201	-0.0324477
1232	Q8IVH8	462	M4K3_HUMAN Mitogen-activated protein kinase kinase kinase kinase 3 OS=Homo sapiens OX=9606 GN=MAP4K3 PE=1 SV=1	ND	0.88496	1.06979	ND	0.977375	0.130695	-0.0330159
1233	Q6P158	453	DHX57_HUMAN Putative ATP-dependent RNA helicase DHX57 OS=Homo sapiens OX=9606 GN=DHX57 PE=1 SV=2	1.06383	0.96495	0.86957	1.0101	0.977113	0.0823031	-0.0334034
1234	Q08499	258	PDE4D_HUMAN cAMP-specific 3',5'-cyclic phosphodiesterase 4D OS=Homo sapiens OX=9606 GN=PDE4D PE=1 SV=2	ND	1.0101	0.97087	0.94967	0.97688	0.03066	-0.0337467
1235	Q16718	17	NDUA5_HUMAN NADH dehydrogenase [ubiquinone] 1 alpha subcomplex subunit 5 OS=Homo sapiens OX=9606 GN=NDUFA5 PE=1 SV=3	0.93458	0.90909	1.08696	ND	0.976877	0.0961831	-0.0337517
1236	Q9BQG0	623	MBB1A_HUMAN Myb-binding protein 1A OS=Homo sapiens OX=9606 GN=MYBBP1A PE=1 SV=2	ND	ND	0.9434	1.0101	0.97675	0.047164	-0.0339387
1237	P24752	126	THIL_HUMAN Acetyl-CoA acetyltransferase, mitochondrial OS=Homo sapiens OX=9606 GN=ACAT1 PE=1 SV=1	0.95442	1.00015	0.97381	0.97696	0.976335	0.0187456	-0.0345518	Active site	Note=Acyl-thioester intermediate;Ontology_term=ECO:0000305;evidence=ECO:0000305|PubMed:17371050;Dbxref=PMID:17371050
1238	Q9H845	507	ACAD9_HUMAN Acyl-CoA dehydrogenase family member 9, mitochondrial OS=Homo sapiens OX=9606 GN=ACAD9 PE=1 SV=1	0.9596	ND	0.82619	1.14316	0.976317	0.159145	-0.0345789
1239	A0A1C7CYX9	609	A0A1C7CYX9_HUMAN Dihydropyrimidinase-related protein 2 OS=Homo sapiens OX=9606 GN=DPYSL2 PE=1 SV=1	ND	0.96154	0.94403	1.02266	0.976077	0.0412814	-0.0349336
1240	Q8IXM2	66	BAP18_HUMAN Chromatin complexes subunit BAP18 OS=Homo sapiens OX=9606 GN=BAP18 PE=1 SV=1	ND	0.97087	0.98039	ND	0.97563	0.00673166	-0.035594
1241	P27816	654	MAP4_HUMAN Microtubule-associated protein 4 OS=Homo sapiens OX=9606 GN=MAP4 PE=1 SV=3	1.03601	1.04167	ND	0.8478	0.97516	0.110333	-0.0362891
1242	Q86W42	35	THOC6_HUMAN THO complex subunit 6 homolog OS=Homo sapiens OX=9606 GN=THOC6 PE=1 SV=1	1.03047	1.01212	0.92342	0.93458	0.975147	0.0540031	-0.0363076
1243	Q9UQ35	956	SRRM2_HUMAN Serine/arginine repetitive matrix protein 2 OS=Homo sapiens OX=9606 GN=SRRM2 PE=1 SV=2	1.02021	0.88612	1.22453	0.76923	0.975023	0.195406	-0.0364926
1244	Q9H9F9	265	ARP5_HUMAN Actin-related protein 5 OS=Homo sapiens OX=9606 GN=ACTR5 PE=1 SV=2	0.9901	0.99696	0.98929	0.92184	0.974548	0.0353064	-0.0371956
1245	Q8TDM6	1736	DLG5_HUMAN Disks large homolog 5 OS=Homo sapiens OX=9606 GN=DLG5 PE=1 SV=4	ND	0.89286	0.9434	1.08696	0.974407	0.100696	-0.0374041
1246	Q14657	23	LAGE3_HUMAN EKC/KEOPS complex subunit LAGE3 OS=Homo sapiens OX=9606 GN=LAGE3 PE=1 SV=2	0.98039	0.97087	ND	0.97087	0.974043	0.00549637	-0.0379421
1247	Q9BYW2	302	SETD2_HUMAN Histone-lysine N-methyltransferase SETD2 OS=Homo sapiens OX=9606 GN=SETD2 PE=1 SV=3	1.02041	ND	ND	0.92593	0.97317	0.0668074	-0.0392362
1248	Q9H0U9	160	TSYL1_HUMAN Testis-specific Y-encoded-like protein 1 OS=Homo sapiens OX=9606 GN=TSPYL1 PE=1 SV=3	0.96154	1.05263	0.9434	0.93458	0.973037	0.0542357	-0.0394327
1249	O60870	212	KIN17_HUMAN DNA/RNA-binding protein KIN17 OS=Homo sapiens OX=9606 GN=KIN PE=1 SV=2	0.9901	0.91341	0.99505	0.9901	0.972165	0.0392394	-0.0407269
1250	P12270	224	TPR_HUMAN Nucleoprotein TPR OS=Homo sapiens OX=9606 GN=TPR PE=1 SV=3	0.9901	0.95238	0.9434	1	0.97147	0.0277692	-0.0417587
1251	Q15365	194	PCBP1_HUMAN Poly(rC)-binding protein 1 OS=Homo sapiens OX=9606 GN=PCBP1 PE=1 SV=2	0.83333	1.0306	1.12099	0.9009	0.971455	0.12899	-0.0417809
1252	Q9H7E2	521	TDRD3_HUMAN Tudor domain-containing protein 3 OS=Homo sapiens OX=9606 GN=TDRD3 PE=1 SV=1	ND	0.9901	0.95238	ND	0.97124	0.0266721	-0.0421003
1253	Q7RTV0	40	PHF5A_HUMAN PHD finger-like domain-containing protein 5A OS=Homo sapiens OX=9606 GN=PHF5A PE=1 SV=1	ND	0.97087	0.98039	0.96154	0.970933	0.00942516	-0.0425559
1254	O14745	16	NHRF1_HUMAN Na(+)/H(+) exchange regulatory cofactor NHE-RF1 OS=Homo sapiens OX=9606 GN=SLC9A3R1 PE=1 SV=4	ND	ND	0.97087	ND	0.97087		-0.04265
1255	O95685	93	PPR3D_HUMAN Protein phosphatase 1 regulatory subunit 3D OS=Homo sapiens OX=9606 GN=PPP1R3D PE=1 SV=1	ND	0.97087	ND	ND	0.97087		-0.04265
1256	P27448	46	MARK3_HUMAN MAP/microtubule affinity-regulating kinase 3 OS=Homo sapiens OX=9606 GN=MARK3 PE=1 SV=5	ND	0.97087	ND	ND	0.97087		-0.04265
1257	P42566	586	EPS15_HUMAN Epidermal growth factor receptor substrate 15 OS=Homo sapiens OX=9606 GN=EPS15 PE=1 SV=2	ND	ND	0.97087	ND	0.97087		-0.04265
1258	P51531	91	SMCA2_HUMAN Probable global transcription activator SNF2L2 OS=Homo sapiens OX=9606 GN=SMARCA2 PE=1 SV=2	ND	ND	ND	0.97087	0.97087		-0.04265
1259	Q00059	49	TFAM_HUMAN Transcription factor A, mitochondrial OS=Homo sapiens OX=9606 GN=TFAM PE=1 SV=1	0.97087	ND	ND	ND	0.97087		-0.04265
1260	Q56VL3	130	OCAD2_HUMAN OCIA domain-containing protein 2 OS=Homo sapiens OX=9606 GN=OCIAD2 PE=1 SV=1	ND	0.97087	ND	ND	0.97087		-0.04265
1261	Q86V48	609	LUZP1_HUMAN Leucine zipper protein 1 OS=Homo sapiens OX=9606 GN=LUZP1 PE=1 SV=2	ND	0.97087	ND	ND	0.97087		-0.04265
1262	Q8N1W1	559	ARG28_HUMAN Rho guanine nucleotide exchange factor 28 OS=Homo sapiens OX=9606 GN=ARHGEF28 PE=1 SV=3	ND	ND	0.97087	ND	0.97087		-0.04265
1263	Q96CP6	480	GRM1A_HUMAN GRAM domain-containing protein 1A OS=Homo sapiens OX=9606 GN=GRAMD1A PE=1 SV=2	0.97087	ND	ND	ND	0.97087		-0.04265
1264	Q9BY89	817	K1671_HUMAN Uncharacterized protein KIAA1671 OS=Homo sapiens OX=9606 GN=KIAA1671 PE=1 SV=2	ND	ND	0.97087	ND	0.97087		-0.04265
1265	P21333	574	FLNA_HUMAN Filamin-A OS=Homo sapiens OX=9606 GN=FLNA PE=1 SV=4	0.97591	0.95589	0.99096	0.95908	0.97046	0.0162454	-0.0432593
1266	Q8IXT5	919	RB12B_HUMAN RNA-binding protein 12B OS=Homo sapiens OX=9606 GN=RBM12B PE=1 SV=2	1.0101	0.89061	0.99677	0.98369	0.970293	0.0542048	-0.0435084
1267	P35579	1437	MYH9_HUMAN Myosin-9 OS=Homo sapiens OX=9606 GN=MYH9 PE=1 SV=4	1.05556	0.94789	0.89688	0.98039	0.97018	0.0664924	-0.0436757
1268	I3L2J0	8	I3L2J0_HUMAN Protein capicua homolog OS=Homo sapiens OX=9606 GN=CIC PE=1 SV=1	1.03093	0.90909	ND	ND	0.97001	0.0861539	-0.0439285
1269	Q92945	436	FUBP2_HUMAN Far upstream element-binding protein 2 OS=Homo sapiens OX=9606 GN=KHSRP PE=1 SV=4	0.70423	ND	1.23457	ND	0.9694	0.375007	-0.044836
1270	P35568	976	IRS1_HUMAN Insulin receptor substrate 1 OS=Homo sapiens OX=9606 GN=IRS1 PE=1 SV=1	1.06383	0.93458	0.90972	ND	0.969377	0.082738	-0.0448707
1271	Q86VB7	621	C163A_HUMAN Scavenger receptor cysteine-rich type 1 protein M130 OS=Homo sapiens OX=9606 GN=CD163 PE=1 SV=2	0.96154	0.9434	0.97087	1	0.968952	0.0236326	-0.0455022	Disulfide bond&Disulfide bond	Ontology_term=ECO:0000255;evidence=ECO:0000255|PROSITE-ProRule:PRU00196$Ontology_term=ECO:0000255;evidence=ECO:0000255|PROSITE-ProRule:PRU00196
1272	Q15257	103	PTPA_HUMAN Serine/threonine-protein phosphatase 2A activator OS=Homo sapiens OX=9606 GN=PTPA PE=1 SV=3	1.08696	0.7874	1.03093	ND	0.96843	0.15926	-0.0462803
1273	P28290	831	SSFA2_HUMAN Sperm-specific antigen 2 OS=Homo sapiens OX=9606 GN=SSFA2 PE=1 SV=3	ND	0.95238	0.9901	0.96154	0.968007	0.0196739	-0.0469111
1274	Q99714	214	HCD2_HUMAN 3-hydroxyacyl-CoA dehydrogenase type-2 OS=Homo sapiens OX=9606 GN=HSD17B10 PE=1 SV=3	1.0101	0.86207	1.03093	ND	0.9677	0.0920692	-0.0473682
1275	Q9UBU9	252	NXF1_HUMAN Nuclear RNA export factor 1 OS=Homo sapiens OX=9606 GN=NXF1 PE=1 SV=1	ND	0.89286	1	1.0101	0.967653	0.0649695	-0.0474378
1276	P55786	265	PSA_HUMAN Puromycin-sensitive aminopeptidase OS=Homo sapiens OX=9606 GN=NPEPPS PE=1 SV=2	0.7874	0.9618	1.04167	1.07893	0.96745	0.129597	-0.047741
1277	Q92667	389	AKAP1_HUMAN A-kinase anchor protein 1, mitochondrial OS=Homo sapiens OX=9606 GN=AKAP1 PE=1 SV=1	ND	ND	0.89286	1.04167	0.967265	0.105225	-0.0480169
1278	Q86YT6	88	MIB1_HUMAN E3 ubiquitin-protein ligase MIB1 OS=Homo sapiens OX=9606 GN=MIB1 PE=1 SV=1	ND	0.9434	0.9901	ND	0.96675	0.0330219	-0.0487852
1279	P57737	34	CORO7_HUMAN Coronin-7 OS=Homo sapiens OX=9606 GN=CORO7 PE=1 SV=2	ND	0.92593	1.03922	0.93458	0.966577	0.0630595	-0.0490439
1280	P78385	446	KRT83_HUMAN Keratin, type II cuticular Hb3 OS=Homo sapiens OX=9606 GN=KRT83 PE=1 SV=2	ND	ND	ND	0.9665	0.9665		-0.0491584
1281	Q9Y6M5	447	ZNT1_HUMAN Zinc transporter 1 OS=Homo sapiens OX=9606 GN=SLC30A1 PE=1 SV=3	ND	0.96154	0.97128	ND	0.96641	0.00688722	-0.0492927
1282	O00116	349	ADAS_HUMAN Alkyldihydroxyacetonephosphate synthase, peroxisomal OS=Homo sapiens OX=9606 GN=AGPS PE=1 SV=1	0.95238	ND	ND	0.98039	0.966385	0.0198061	-0.04933
1283	Q8WXA9	494	SREK1_HUMAN Splicing regulatory glutamine/lysine-rich protein 1 OS=Homo sapiens OX=9606 GN=SREK1 PE=1 SV=1	1	0.98039	ND	0.91743	0.96594	0.0431399	-0.0499945
1284	Q93008	842	USP9X_HUMAN Probable ubiquitin carboxyl-terminal hydrolase FAF-X OS=Homo sapiens OX=9606 GN=USP9X PE=1 SV=3	0.90909	1.02041	0.9901	0.9434	0.96575	0.0492968	-0.0502783
1285	Q9BZG1	38	RAB34_HUMAN Ras-related protein Rab-34 OS=Homo sapiens OX=9606 GN=RAB34 PE=1 SV=1	0.78433	1.01474	1.16051	0.90117	0.965187	0.160638	-0.0511189
1286	Q00653	432	NFKB2_HUMAN Nuclear factor NF-kappa-B p100 subunit OS=Homo sapiens OX=9606 GN=NFKB2 PE=1 SV=4	ND	ND	0.80645	1.1236	0.965025	0.224259	-0.0513618
1287	Q7Z3T8	269	ZFY16_HUMAN Zinc finger FYVE domain-containing protein 16 OS=Homo sapiens OX=9606 GN=ZFYVE16 PE=1 SV=3	0.95238	0.96154	ND	0.98039	0.96477	0.0142816	-0.051743
1288	P28370	377	SMCA1_HUMAN Probable global transcription activator SNF2L1 OS=Homo sapiens OX=9606 GN=SMARCA1 PE=1 SV=2	ND	1.02041	0.90909	ND	0.96475	0.0787151	-0.051773
1289	Q7L0Y3	78	TM10C_HUMAN tRNA methyltransferase 10 homolog C OS=Homo sapiens OX=9606 GN=TRMT10C PE=1 SV=2	ND	1.03314	0.88945	0.97087	0.964487	0.0720574	-0.0521668
1290	Q7Z417	234	NUFP2_HUMAN Nuclear fragile X mental retardation-interacting protein 2 OS=Homo sapiens OX=9606 GN=NUFIP2 PE=1 SV=1	1.13636	0.86963	ND	0.88496	0.96365	0.149768	-0.0534188
1291	Q9GZT9	127	EGLN1_HUMAN Egl nine homolog 1 OS=Homo sapiens OX=9606 GN=EGLN1 PE=1 SV=1	0.95221	0.98269	0.93481	0.98416	0.963468	0.0241224	-0.0536921
1292	P60981	23	DEST_HUMAN Destrin OS=Homo sapiens OX=9606 GN=DSTN PE=1 SV=3	1.05336	0.86561	0.99767	0.93709	0.963433	0.0806687	-0.0537445
1293	Q92667	376	AKAP1_HUMAN A-kinase anchor protein 1, mitochondrial OS=Homo sapiens OX=9606 GN=AKAP1 PE=1 SV=1	0.9901	ND	0.92664	0.97087	0.962537	0.0325404	-0.0550866
1294	Q9NUL3	140	STAU2_HUMAN Double-stranded RNA-binding protein Staufen homolog 2 OS=Homo sapiens OX=9606 GN=STAU2 PE=1 SV=2	ND	0.94373	0.98124	ND	0.962485	0.0265236	-0.055164
1295	P54646	382	AAPK2_HUMAN 5'-AMP-activated protein kinase catalytic subunit alpha-2 OS=Homo sapiens OX=9606 GN=PRKAA2 PE=1 SV=2	0.9901	ND	0.93458	ND	0.96234	0.0392586	-0.0553814
1296	Q9Y4C2	487	TCAF1_HUMAN TRPM8 channel-associated factor 1 OS=Homo sapiens OX=9606 GN=TCAF1 PE=1 SV=3	0.93458	ND	0.9901	ND	0.96234	0.0392586	-0.0553814
1297	Q12888	1159	TP53B_HUMAN TP53-binding protein 1 OS=Homo sapiens OX=9606 GN=TP53BP1 PE=1 SV=2	ND	0.9901	0.92593	0.97087	0.9623	0.0329322	-0.0554414
1298	Q5VUA4	1860	ZN318_HUMAN Zinc finger protein 318 OS=Homo sapiens OX=9606 GN=ZNF318 PE=1 SV=2	ND	0.9434	0.98039	ND	0.961895	0.0261559	-0.0560487
1299	Q9Y2I8	417	WDR37_HUMAN WD repeat-containing protein 37 OS=Homo sapiens OX=9606 GN=WDR37 PE=1 SV=2	ND	ND	0.96163	ND	0.96163		-0.0564462
1300	Q8TCG1	337	CIP2A_HUMAN Protein CIP2A OS=Homo sapiens OX=9606 GN=CIP2A PE=1 SV=2	ND	0.97087	0.95238	ND	0.961625	0.0130744	-0.0564537
1301	Q9BTC0	455	DIDO1_HUMAN Death-inducer obliterator 1 OS=Homo sapiens OX=9606 GN=DIDO1 PE=1 SV=5	0.97087	0.95238	ND	ND	0.961625	0.0130744	-0.0564537
1302	A0A2P9AIP6	67	A0A2P9AIP6_HUMAN Uncharacterized protein OS=Homo sapiens OX=9606 GN=BQ8482_180240 PE=4 SV=1	ND	ND	ND	0.96154	0.96154		-0.0565812
1303	J3KNF4	3	J3KNF4_HUMAN Copper chaperone for superoxide dismutase OS=Homo sapiens OX=9606 GN=CCS PE=1 SV=1	ND	ND	0.96154	ND	0.96154		-0.0565812	Metal binding	Ontology_term=ECO:0000256;evidence=ECO:0000256|PROSITE-ProRule:PRU00280
1304	O14879	239	IFIT3_HUMAN Interferon-induced protein with tetratricopeptide repeats 3 OS=Homo sapiens OX=9606 GN=IFIT3 PE=1 SV=1	ND	0.96154	ND	ND	0.96154		-0.0565812
1305	O75363	343	BCAS1_HUMAN Breast carcinoma-amplified sequence 1 OS=Homo sapiens OX=9606 GN=BCAS1 PE=1 SV=2	ND	0.96154	ND	ND	0.96154		-0.0565812
1306	P08047	68	SP1_HUMAN Transcription factor Sp1 OS=Homo sapiens OX=9606 GN=SP1 PE=1 SV=3	ND	ND	ND	0.96154	0.96154		-0.0565812
1307	P21291	167	CSRP1_HUMAN Cysteine and glycine-rich protein 1 OS=Homo sapiens OX=9606 GN=CSRP1 PE=1 SV=3	ND	ND	ND	0.96154	0.96154		-0.0565812
1308	P38606	277	VATA_HUMAN V-type proton ATPase catalytic subunit A OS=Homo sapiens OX=9606 GN=ATP6V1A PE=1 SV=2	0.96154	ND	ND	ND	0.96154		-0.0565812
1309	Q5T280	239	CI114_HUMAN Putative methyltransferase C9orf114 OS=Homo sapiens OX=9606 GN=SPOUT1 PE=1 SV=3	ND	ND	0.96154	ND	0.96154		-0.0565812
1310	Q93052	364	LPP_HUMAN Lipoma-preferred partner OS=Homo sapiens OX=9606 GN=LPP PE=1 SV=1	0.96154	ND	ND	ND	0.96154		-0.0565812
1311	Q99832	364	TCPH_HUMAN T-complex protein 1 subunit eta OS=Homo sapiens OX=9606 GN=CCT7 PE=1 SV=2	ND	ND	ND	0.96154	0.96154		-0.0565812
1312	P18583	92	SON_HUMAN Protein SON OS=Homo sapiens OX=9606 GN=SON PE=1 SV=4	0.9901	0.84034	1.05263	ND	0.961023	0.109091	-0.0573566
1313	A0A024R4E5	53	A0A024R4E5_HUMAN High density lipoprotein binding protein (Vigilin), isoform CRA_a OS=Homo sapiens OX=9606 GN=HDLBP PE=1 SV=1	ND	1.004	ND	0.91743	0.960715	0.0612142	-0.0578196
1314	Q3KQU3	361	MA7D1_HUMAN MAP7 domain-containing protein 1 OS=Homo sapiens OX=9606 GN=MAP7D1 PE=1 SV=1	0.9009	0.9901	0.9901	ND	0.960367	0.0514996	-0.0583428
1315	Q12986	190	NFX1_HUMAN Transcriptional repressor NF-X1 OS=Homo sapiens OX=9606 GN=NFX1 PE=1 SV=2	ND	1.02041	0.92593	0.93458	0.960307	0.0522304	-0.0584329
1316	Q15084	55	PDIA6_HUMAN Protein disulfide-isomerase A6 OS=Homo sapiens OX=9606 GN=PDIA6 PE=1 SV=1	0.90909	1.04515	0.9434	0.9434	0.96026	0.0588592	-0.058503	Active site&Disulfide bond&Mutagenesis	Note=Nucleophile;Ontology_term=ECO:0000250;evidence=ECO:0000250$Note=Redox-active;Ontology_term=ECO:0000255;evidence=ECO:0000255|PROSITE-ProRule:PRU00691$Note=50%25 decrease in enzyme activity%3B when associated with S-58. Abolishes enzyme activity%3B when associated with S-58%3B S-190 and S-193. C->S;Ontology_term=ECO:0000269;evidence=ECO:0000269|PubMed:12204115;Dbxref=PMID:12204115
1317	P31749	77	AKT1_HUMAN RAC-alpha serine/threonine-protein kinase OS=Homo sapiens OX=9606 GN=AKT1 PE=1 SV=2	1.04167	0.89344	0.92593	0.97766	0.959675	0.0647365	-0.0593822	Disulfide bond	Ontology_term=ECO:0000269;evidence=ECO:0000269|PubMed:20886116;Dbxref=PMID:20886116
1318	Q5VTR2	344	BRE1A_HUMAN E3 ubiquitin-protein ligase BRE1A OS=Homo sapiens OX=9606 GN=RNF20 PE=1 SV=2	1.05263	0.92593	0.92593	0.93025	0.958685	0.0626631	-0.0608712
1319	Q14151	361	SAFB2_HUMAN Scaffold attachment factor B2 OS=Homo sapiens OX=9606 GN=SAFB2 PE=1 SV=1	ND	0.90505	1.02668	0.9434	0.958377	0.0621827	-0.0613353
1320	P15924	1805	DESP_HUMAN Desmoplakin OS=Homo sapiens OX=9606 GN=DSP PE=1 SV=3	0.93948	0.9901	1.0101	0.89286	0.958135	0.0526971	-0.0616992
1321	Q8TBB5	373	KLDC4_HUMAN Kelch domain-containing protein 4 OS=Homo sapiens OX=9606 GN=KLHDC4 PE=1 SV=1	ND	1.02041	0.91804	0.93563	0.958027	0.0547368	-0.0618623
1322	Q9Y618	2447	NCOR2_HUMAN Nuclear receptor corepressor 2 OS=Homo sapiens OX=9606 GN=NCOR2 PE=1 SV=2	ND	0.92593	ND	0.9901	0.958015	0.045375	-0.0618798	Mutagenesis	Note=Abolishes interaction with TBL1X. HRIL->AEIA;Ontology_term=ECO:0000269;evidence=ECO:0000269|PubMed:21240272;Dbxref=PMID:21240272
1323	Q8WY36	606	BBX_HUMAN HMG box transcription factor BBX OS=Homo sapiens OX=9606 GN=BBX PE=1 SV=1	ND	1.03093	0.88496	ND	0.957945	0.103216	-0.0619853
1324	O60504	482	VINEX_HUMAN Vinexin OS=Homo sapiens OX=9606 GN=SORBS3 PE=1 SV=2	ND	ND	0.95794	ND	0.95794		-0.0619928
1325	Q96B70	316	LENG9_HUMAN Leukocyte receptor cluster member 9 OS=Homo sapiens OX=9606 GN=LENG9 PE=2 SV=2	0.96154	0.89505	0.96806	1.00709	0.957935	0.0464982	-0.0620003
1326	P14866	472	HNRPL_HUMAN Heterogeneous nuclear ribonucleoprotein L OS=Homo sapiens OX=9606 GN=HNRNPL PE=1 SV=2	0.96726	1.03134	0.87501	ND	0.95787	0.0785869	-0.0620982
1327	P54136	34	SYRC_HUMAN Arginine--tRNA ligase, cytoplasmic OS=Homo sapiens OX=9606 GN=RARS PE=1 SV=2	ND	0.84034	ND	1.07527	0.957805	0.166121	-0.0621961
1328	Q9Y4W2	306	LAS1L_HUMAN Ribosomal biogenesis protein LAS1L OS=Homo sapiens OX=9606 GN=LAS1L PE=1 SV=2	ND	0.88496	1.03022	ND	0.95759	0.102714	-0.06252
1329	Q8WXG6	1489	MADD_HUMAN MAP kinase-activating death domain protein OS=Homo sapiens OX=9606 GN=MADD PE=1 SV=2	ND	1.16279	0.75188	ND	0.957335	0.290557	-0.0629042
1330	Q9NV56	170	MRGBP_HUMAN MRG/MORF4L-binding protein OS=Homo sapiens OX=9606 GN=MRGBP PE=1 SV=1	ND	0.95238	0.8547	1.06383	0.95697	0.104641	-0.0634544
1331	Q13057	144	COASY_HUMAN Bifunctional coenzyme A synthase OS=Homo sapiens OX=9606 GN=COASY PE=1 SV=4	0.97325	0.93491	0.9901	0.92593	0.956048	0.0306015	-0.0648458
1332	Q9GZR7	832	DDX24_HUMAN ATP-dependent RNA helicase DDX24 OS=Homo sapiens OX=9606 GN=DDX24 PE=1 SV=1	0.92869	ND	1	0.93901	0.9559	0.0385387	-0.0650684
1333	Q9BZ67	246	FRMD8_HUMAN FERM domain-containing protein 8 OS=Homo sapiens OX=9606 GN=FRMD8 PE=1 SV=1	ND	1.0101	0.82645	1.03093	0.955827	0.112527	-0.0651791
1334	P07814	856	SYEP_HUMAN Bifunctional glutamate/proline--tRNA ligase OS=Homo sapiens OX=9606 GN=EPRS PE=1 SV=5	ND	0.93458	0.96154	0.97087	0.955663	0.0188452	-0.0654256
1335	P14866	452	HNRPL_HUMAN Heterogeneous nuclear ribonucleoprotein L OS=Homo sapiens OX=9606 GN=HNRNPL PE=1 SV=2	0.98287	0.94891	0.93458	ND	0.955453	0.0248011	-0.0657427
1336	Q9Y224	19	RTRAF_HUMAN RNA transcription, translation and transport factor protein OS=Homo sapiens OX=9606 GN=RTRAF PE=1 SV=1	0.97563	0.95549	0.93458	ND	0.955233	0.0205262	-0.0660749
1337	O43790	384	KRT86_HUMAN Keratin, type II cuticular Hb6 OS=Homo sapiens OX=9606 GN=KRT86 PE=1 SV=1	1.0035	0.88176	ND	0.98039	0.955217	0.0646562	-0.0661001
1338	Q8NI27	1236	THOC2_HUMAN THO complex subunit 2 OS=Homo sapiens OX=9606 GN=THOC2 PE=1 SV=2	0.97826	0.9717	0.95238	0.91743	0.954942	0.0273147	-0.0665142
1339	Q9HAS0	182	NJMU_HUMAN Protein Njmu-R1 OS=Homo sapiens OX=9606 GN=C17orf75 PE=1 SV=2	0.98039	1.06383	ND	0.81967	0.95463	0.124102	-0.0669864
1340	Q5T160	11	SYRM_HUMAN Probable arginine--tRNA ligase, mitochondrial OS=Homo sapiens OX=9606 GN=RARS2 PE=1 SV=1	0.93458	1.02041	0.9009	0.96154	0.954357	0.0505416	-0.0673983
1341	P46063	478	RECQ1_HUMAN ATP-dependent DNA helicase Q1 OS=Homo sapiens OX=9606 GN=RECQL PE=1 SV=3	ND	0.87719	1.03093	ND	0.95406	0.108711	-0.0678481
1342	Q92797	578	SYMPK_HUMAN Symplekin OS=Homo sapiens OX=9606 GN=SYMPK PE=1 SV=2	ND	0.96154	0.84746	1.05263	0.953877	0.102799	-0.0681254
1343	Q12986	54	NFX1_HUMAN Transcriptional repressor NF-X1 OS=Homo sapiens OX=9606 GN=NFX1 PE=1 SV=2	ND	0.9901	0.91743	ND	0.953765	0.0513854	-0.0682943
1344	Q6ZSS7	743	MFSD6_HUMAN Major facilitator superfamily domain-containing protein 6 OS=Homo sapiens OX=9606 GN=MFSD6 PE=1 SV=2	ND	0.84746	1.03093	0.98039	0.952927	0.0947681	-0.0695629
1345	Q9H6S0	25	YTDC2_HUMAN 3'-5' RNA helicase YTHDC2 OS=Homo sapiens OX=9606 GN=YTHDC2 PE=1 SV=2	0.97087	ND	ND	0.93458	0.952725	0.0256609	-0.0698682
1346	P08670	328	VIME_HUMAN Vimentin OS=Homo sapiens OX=9606 GN=VIM PE=1 SV=4	0.89202	1.03015	0.94323	0.9445	0.952475	0.0572634	-0.0702469
1347	O60518	31	RNBP6_HUMAN Ran-binding protein 6 OS=Homo sapiens OX=9606 GN=RANBP6 PE=1 SV=2	ND	0.95238	ND	ND	0.95238		-0.0703908
1348	P21580	727	TNAP3_HUMAN Tumor necrosis factor alpha-induced protein 3 OS=Homo sapiens OX=9606 GN=TNFAIP3 PE=1 SV=1	ND	0.95238	ND	ND	0.95238		-0.0703908
1349	P37275	236	ZEB1_HUMAN Zinc finger E-box-binding homeobox 1 OS=Homo sapiens OX=9606 GN=ZEB1 PE=1 SV=2	ND	0.95238	ND	ND	0.95238		-0.0703908
1350	P49116	204	NR2C2_HUMAN Nuclear receptor subfamily 2 group C member 2 OS=Homo sapiens OX=9606 GN=NR2C2 PE=1 SV=1	ND	0.95238	ND	ND	0.95238		-0.0703908
1351	Q12802	1677	AKP13_HUMAN A-kinase anchor protein 13 OS=Homo sapiens OX=9606 GN=AKAP13 PE=1 SV=2	ND	0.95238	ND	ND	0.95238		-0.0703908
1352	Q13042	194	CDC16_HUMAN Cell division cycle protein 16 homolog OS=Homo sapiens OX=9606 GN=CDC16 PE=1 SV=2	ND	ND	0.95238	ND	0.95238		-0.0703908
1353	Q14008	1946	CKAP5_HUMAN Cytoskeleton-associated protein 5 OS=Homo sapiens OX=9606 GN=CKAP5 PE=1 SV=3	ND	ND	0.95238	ND	0.95238		-0.0703908
1354	Q15392	252	DHC24_HUMAN Delta(24)-sterol reductase OS=Homo sapiens OX=9606 GN=DHCR24 PE=1 SV=2	0.95238	ND	ND	ND	0.95238		-0.0703908
1355	Q6PI48	152	SYDM_HUMAN Aspartate--tRNA ligase, mitochondrial OS=Homo sapiens OX=9606 GN=DARS2 PE=1 SV=1	ND	ND	0.95238	ND	0.95238		-0.0703908
1356	Q8NCE0	192	SEN2_HUMAN tRNA-splicing endonuclease subunit Sen2 OS=Homo sapiens OX=9606 GN=TSEN2 PE=1 SV=2	ND	0.95238	ND	ND	0.95238		-0.0703908
1357	Q8NFA0	1320	UBP32_HUMAN Ubiquitin carboxyl-terminal hydrolase 32 OS=Homo sapiens OX=9606 GN=USP32 PE=1 SV=1	ND	0.95238	ND	ND	0.95238		-0.0703908
1358	Q8TEQ6	1415	GEMI5_HUMAN Gem-associated protein 5 OS=Homo sapiens OX=9606 GN=GEMIN5 PE=1 SV=3	ND	ND	ND	0.95238	0.95238		-0.0703908
1359	Q8WXD5	91	GEMI6_HUMAN Gem-associated protein 6 OS=Homo sapiens OX=9606 GN=GEMIN6 PE=1 SV=1	ND	0.95238	ND	ND	0.95238		-0.0703908
1360	Q96RU2	733	UBP28_HUMAN Ubiquitin carboxyl-terminal hydrolase 28 OS=Homo sapiens OX=9606 GN=USP28 PE=1 SV=1	0.95238	ND	ND	ND	0.95238		-0.0703908
1361	Q9H7U1	193	CCSE2_HUMAN Serine-rich coiled-coil domain-containing protein 2 OS=Homo sapiens OX=9606 GN=CCSER2 PE=1 SV=2	ND	ND	0.95238	ND	0.95238		-0.0703908
1362	Q9UBZ4	368	APEX2_HUMAN DNA-(apurinic or apyrimidinic site) lyase 2 OS=Homo sapiens OX=9606 GN=APEX2 PE=1 SV=1	ND	ND	0.95238	ND	0.95238		-0.0703908
1363	Q9UF56	207	FXL17_HUMAN F-box/LRR-repeat protein 17 OS=Homo sapiens OX=9606 GN=FBXL17 PE=2 SV=3	ND	0.95238	ND	ND	0.95238		-0.0703908
1364	Q9UIG0	1205	BAZ1B_HUMAN Tyrosine-protein kinase BAZ1B OS=Homo sapiens OX=9606 GN=BAZ1B PE=1 SV=2	ND	ND	0.95238	ND	0.95238		-0.0703908
1365	O94903	261	PLPHP_HUMAN Pyridoxal phosphate homeostasis protein OS=Homo sapiens OX=9606 GN=PLPBP PE=1 SV=1	ND	ND	1.35135	0.55249	0.95192	0.564879	-0.0710878
1366	M0QYT0	69	M0QYT0_HUMAN Uncharacterized protein (Fragment) OS=Homo sapiens OX=9606 PE=1 SV=1	ND	ND	ND	0.95182	0.95182		-0.0712393
1367	Q9BZG8	428	DPH1_HUMAN 2-(3-amino-3-carboxypropyl)histidine synthase subunit 1 OS=Homo sapiens OX=9606 GN=DPH1 PE=1 SV=2	0.81301	0.9901	0.96154	1.04167	0.95158	0.098151	-0.0716031
1368	Q9ULU4	567	PKCB1_HUMAN Protein kinase C-binding protein 1 OS=Homo sapiens OX=9606 GN=ZMYND8 PE=1 SV=2	1.0989	0.89286	0.86213	0.95238	0.951567	0.105124	-0.0716221
1369	Q15417	173	CNN3_HUMAN Calponin-3 OS=Homo sapiens OX=9606 GN=CNN3 PE=1 SV=1	0.89286	ND	1.00878	0.95247	0.95137	0.0579678	-0.0719216
1370	Q9Y3T6	100	R3HC1_HUMAN R3H and coiled-coil domain-containing protein 1 OS=Homo sapiens OX=9606 GN=R3HCC1 PE=1 SV=3	0.9901	0.86207	1.02041	0.9324	0.951245	0.0697635	-0.0721111
1371	Q8IXI2	175	MIRO1_HUMAN Mitochondrial Rho GTPase 1 OS=Homo sapiens OX=9606 GN=RHOT1 PE=1 SV=2	0.90613	1.05263	0.8547	0.99144	0.951225	0.0880357	-0.0721415
1372	Q9Y5Y2	72	NUBP2_HUMAN Cytosolic Fe-S cluster assembly factor NUBP2 OS=Homo sapiens OX=9606 GN=NUBP2 PE=1 SV=1	ND	0.84045	0.97087	1.04167	0.950997	0.102071	-0.0724878
1373	Q9BZ95	495	NSD3_HUMAN Histone-lysine N-methyltransferase NSD3 OS=Homo sapiens OX=9606 GN=NSD3 PE=1 SV=1	ND	0.9009	1	ND	0.95045	0.0700743	-0.0733174
1374	O00244	12	ATOX1_HUMAN Copper transport protein ATOX1 OS=Homo sapiens OX=9606 GN=ATOX1 PE=1 SV=1	0.98836	0.92327	0.90205	0.98626	0.949985	0.0439696	-0.0740234	Metal binding	Note=Copper
1375	Q32MZ4	456	LRRF1_HUMAN Leucine-rich repeat flightless-interacting protein 1 OS=Homo sapiens OX=9606 GN=LRRFIP1 PE=1 SV=2	0.98039	0.9434	0.92593	ND	0.949907	0.0278069	-0.0741423
1376	P20810	408	ICAL_HUMAN Calpastatin OS=Homo sapiens OX=9606 GN=CAST PE=1 SV=4	0.94348	0.94621	1.02041	0.8886	0.949675	0.0541109	-0.0744942
1377	Q9BTC0	498	DIDO1_HUMAN Death-inducer obliterator 1 OS=Homo sapiens OX=9606 GN=DIDO1 PE=1 SV=5	ND	0.9901	ND	0.90909	0.949595	0.0572827	-0.0746158
1378	Q12767	674	TMM94_HUMAN Transmembrane protein 94 OS=Homo sapiens OX=9606 GN=TMEM94 PE=1 SV=1	ND	0.9434	1.0989	0.80645	0.949583	0.146323	-0.0746335
1379	O15027	2115	SC16A_HUMAN Protein transport protein Sec16A OS=Homo sapiens OX=9606 GN=SEC16A PE=1 SV=3	ND	0.9901	0.86711	0.99102	0.94941	0.0712754	-0.0748968
1380	O75616	150	ERAL1_HUMAN GTPase Era, mitochondrial OS=Homo sapiens OX=9606 GN=ERAL1 PE=1 SV=2	ND	0.89286	0.9009	1.05263	0.948797	0.0900121	-0.0758292
1381	Q6NZY4	393	ZCHC8_HUMAN Zinc finger CCHC domain-containing protein 8 OS=Homo sapiens OX=9606 GN=ZCCHC8 PE=1 SV=2	ND	0.95238	0.97439	0.91743	0.948067	0.0287239	-0.0769396
1382	P00390	107	GSHR_HUMAN Glutathione reductase, mitochondrial OS=Homo sapiens OX=9606 GN=GSR PE=1 SV=2	0.76923	1.11111	ND	0.96154	0.947293	0.171385	-0.0781169	Disulfide bond	Note=Redox-active;Ontology_term=ECO:0000269;evidence=ECO:0000269|PubMed:8626496;Dbxref=PMID:8626496
1383	Q9NS18	77	GLRX2_HUMAN Glutaredoxin-2, mitochondrial OS=Homo sapiens OX=9606 GN=GLRX2 PE=1 SV=1	0.98039	ND	0.92593	0.93536	0.947227	0.0291047	-0.0782184	Modified residue&Disulfide bond	Note=S-glutathionyl cysteine%3B alternate;Ontology_term=ECO:0000269;evidence=ECO:0000269|PubMed:17121859;Dbxref=PMID:17121859$Note=Redox-active%3B alternate;Ontology_term=ECO:0000250;evidence=ECO:0000250
1384	Q96ME7	540	ZN512_HUMAN Zinc finger protein 512 OS=Homo sapiens OX=9606 GN=ZNF512 PE=1 SV=2	ND	0.71942	0.80645	1.31579	0.94722	0.322144	-0.0782286
1385	Q9Y520	223	PRC2C_HUMAN Protein PRRC2C OS=Homo sapiens OX=9606 GN=PRRC2C PE=1 SV=4	0.93548	1.00711	0.90462	0.94092	0.947032	0.0431237	-0.0785142
1386	Q9H4L5	24	OSBL3_HUMAN Oxysterol-binding protein-related protein 3 OS=Homo sapiens OX=9606 GN=OSBPL3 PE=1 SV=1	ND	0.84034	1.0101	0.9901	0.946847	0.092778	-0.0787973
1387	O95059	78	RPP14_HUMAN Ribonuclease P protein subunit p14 OS=Homo sapiens OX=9606 GN=RPP14 PE=1 SV=3	ND	0.98039	0.86957	0.9901	0.946687	0.0669612	-0.0790411
1388	Q13905	817	RPGF1_HUMAN Rap guanine nucleotide exchange factor 1 OS=Homo sapiens OX=9606 GN=RAPGEF1 PE=1 SV=3	ND	ND	1	0.89286	0.94643	0.0757594	-0.0794323
1389	P07814	1377	SYEP_HUMAN Bifunctional glutamate/proline--tRNA ligase OS=Homo sapiens OX=9606 GN=EPRS PE=1 SV=5	1.0989	0.87719	0.8547	0.95238	0.945793	0.110287	-0.0804044
1390	Q9BXB5	203	OSB10_HUMAN Oxysterol-binding protein-related protein 10 OS=Homo sapiens OX=9606 GN=OSBPL10 PE=1 SV=2	1.02041	ND	0.93948	0.87719	0.945693	0.0718119	-0.0805557
1391	Q9H1K1	138	ISCU_HUMAN Iron-sulfur cluster assembly enzyme ISCU, mitochondrial OS=Homo sapiens OX=9606 GN=ISCU PE=1 SV=2	1.06383	0.91706	0.91885	0.88262	0.94559	0.0805707	-0.0807133
1392	O95671	4	ASML_HUMAN N-acetylserotonin O-methyltransferase-like protein OS=Homo sapiens OX=9606 GN=ASMTL PE=1 SV=3	ND	0.78125	1.0101	1.04167	0.94434	0.142119	-0.0826217
1393	P19838	61	NFKB1_HUMAN Nuclear factor NF-kappa-B p105 subunit OS=Homo sapiens OX=9606 GN=NFKB1 PE=1 SV=2	0.8547	0.92593	1.13439	0.86207	0.944273	0.130718	-0.0827248	Modified residue&Mutagenesis	Note=S-nitrosocysteine%3B alternate;Ontology_term=ECO:0000269;evidence=ECO:0000269|PubMed:8710491;Dbxref=PMID:8710491$Note=Suppresses S-nitrosylation-induced inhibition of DNA-binding activity. Loss of S-(15-deoxy-Delta12%2C14-prostaglandin J2-9-yl)cysteine-induced inhibition of DNA-binding activity. C->S;Ontology_term=ECO:0000269,ECO:0000269;evidence=ECO:0000269|PubMed:11466314,ECO:0000269|PubMe…
1394	B4DE59	33	B4DE59_HUMAN cDNA FLJ60424, highly similar to Junction plakoglobin OS=Homo sapiens OX=9606 PE=2 SV=1	ND	0.9035	0.97299	0.95601	0.944167	0.0362272	-0.0828865
1395	A6H8X9	212	A6H8X9_HUMAN Centrosomal protein 170kDa OS=Homo sapiens OX=9606 GN=CEP170 PE=2 SV=1	0.97087	ND	0.91743	ND	0.94415	0.0377878	-0.082912
1396	Q27J81	394	INF2_HUMAN Inverted formin-2 OS=Homo sapiens OX=9606 GN=INF2 PE=1 SV=2	0.91341	0.92	0.9009	1.04167	0.943995	0.0655967	-0.0831489
1397	Q9ULD2	928	MTUS1_HUMAN Microtubule-associated tumor suppressor 1 OS=Homo sapiens OX=9606 GN=MTUS1 PE=1 SV=2	0.98039	0.91743	1	0.87719	0.943752	0.0566555	-0.0835195
1398	O14879	365	IFIT3_HUMAN Interferon-induced protein with tetratricopeptide repeats 3 OS=Homo sapiens OX=9606 GN=IFIT3 PE=1 SV=1	ND	0.76336	1.1236	ND	0.94348	0.254728	-0.0839362
1399	O75157	201	T22D2_HUMAN TSC22 domain family protein 2 OS=Homo sapiens OX=9606 GN=TSC22D2 PE=1 SV=3	ND	ND	0.9434	ND	0.9434		-0.0840585
1400	P04222	345	1C03_HUMAN HLA class I histocompatibility antigen, Cw-3 alpha chain OS=Homo sapiens OX=9606 GN=HLA-C PE=1 SV=2	ND	ND	0.9434	ND	0.9434		-0.0840585
1401	P05388	119	RLA0_HUMAN 60S acidic ribosomal protein P0 OS=Homo sapiens OX=9606 GN=RPLP0 PE=1 SV=1	ND	ND	ND	0.9434	0.9434		-0.0840585
1402	P15822	217	ZEP1_HUMAN Zinc finger protein 40 OS=Homo sapiens OX=9606 GN=HIVEP1 PE=1 SV=3	ND	ND	0.9434	ND	0.9434		-0.0840585
1403	P35659	89	DEK_HUMAN Protein DEK OS=Homo sapiens OX=9606 GN=DEK PE=1 SV=1	ND	ND	0.9434	ND	0.9434		-0.0840585
1404	P37173	533	TGFR2_HUMAN TGF-beta receptor type-2 OS=Homo sapiens OX=9606 GN=TGFBR2 PE=1 SV=2	ND	ND	0.9434	ND	0.9434		-0.0840585	Disulfide bond	Ontology_term=ECO:0000269,ECO:0000269,ECO:0000269,ECO:0000269,ECO:0000269;evidence=ECO:0000269|PubMed:11850637,ECO:0000269|PubMed:12121646,ECO:0000269|PubMed:12939140,ECO:0000269|PubMed:18243111,ECO:0000269|PubMed:20207738;Dbxref=PMID:11850637,PMID:12121646,PMID:12939140,PMID:18243111,PMID:20207738
1405	P62633	140	CNBP_HUMAN Cellular nucleic acid-binding protein OS=Homo sapiens OX=9606 GN=CNBP PE=1 SV=1	ND	ND	0.9434	ND	0.9434		-0.0840585
1406	Q13395	592	TARB1_HUMAN Probable methyltransferase TARBP1 OS=Homo sapiens OX=9606 GN=TARBP1 PE=1 SV=1	ND	0.9434	ND	ND	0.9434		-0.0840585
1407	Q14676	26	MDC1_HUMAN Mediator of DNA damage checkpoint protein 1 OS=Homo sapiens OX=9606 GN=MDC1 PE=1 SV=3	0.9434	ND	ND	ND	0.9434		-0.0840585
1408	Q14999	1569	CUL7_HUMAN Cullin-7 OS=Homo sapiens OX=9606 GN=CUL7 PE=1 SV=2	ND	0.9434	ND	ND	0.9434		-0.0840585
1409	Q8IXW5	358	RPAP2_HUMAN Putative RNA polymerase II subunit B1 CTD phosphatase RPAP2 OS=Homo sapiens OX=9606 GN=RPAP2 PE=1 SV=1	ND	ND	ND	0.9434	0.9434		-0.0840585
1410	Q99575	745	POP1_HUMAN Ribonucleases P/MRP protein subunit POP1 OS=Homo sapiens OX=9606 GN=POP1 PE=1 SV=2	ND	0.9434	ND	ND	0.9434		-0.0840585
1411	Q9HC62	283	SENP2_HUMAN Sentrin-specific protease 2 OS=Homo sapiens OX=9606 GN=SENP2 PE=1 SV=3	ND	ND	ND	0.9434	0.9434		-0.0840585
1412	O75683	19	SURF6_HUMAN Surfeit locus protein 6 OS=Homo sapiens OX=9606 GN=SURF6 PE=1 SV=3	0.86957	0.9436	0.97279	0.98615	0.943028	0.0520951	-0.0846283
1413	Q9BW83	166	IFT27_HUMAN Intraflagellar transport protein 27 homolog OS=Homo sapiens OX=9606 GN=IFT27 PE=1 SV=1	ND	ND	1.05263	0.83333	0.94298	0.155069	-0.0847009
1414	Q8TD19	623	NEK9_HUMAN Serine/threonine-protein kinase Nek9 OS=Homo sapiens OX=9606 GN=NEK9 PE=1 SV=2	0.95414	0.96485	0.93491	0.91722	0.94278	0.0210664	-0.0850069
1415	P18084	202	ITB5_HUMAN Integrin beta-5 OS=Homo sapiens OX=9606 GN=ITGB5 PE=1 SV=1	ND	0.84746	0.9901	0.9901	0.942553	0.0823532	-0.0853538	Disulfide bond	Ontology_term=ECO:0000250;evidence=ECO:0000250
1416	P25205	148	MCM3_HUMAN DNA replication licensing factor MCM3 OS=Homo sapiens OX=9606 GN=MCM3 PE=1 SV=3	0.93458	ND	0.90148	0.9901	0.942053	0.0447802	-0.0861194
1417	Q9P2X3	226	IMPCT_HUMAN Protein IMPACT OS=Homo sapiens OX=9606 GN=IMPACT PE=1 SV=2	0.9901	0.93458	0.92593	0.91743	0.94201	0.0328156	-0.0861857
1418	P37802	124	TAGL2_HUMAN Transgelin-2 OS=Homo sapiens OX=9606 GN=TAGLN2 PE=1 SV=3	0.92086	0.94259	0.90044	1.00382	0.941928	0.0447071	-0.0863121
1419	Q9NV70	566	EXOC1_HUMAN Exocyst complex component 1 OS=Homo sapiens OX=9606 GN=EXOC1 PE=1 SV=4	0.95238	0.79365	1.13636	0.88496	0.941837	0.14508	-0.0864499
1420	O60313	801	OPA1_HUMAN Dynamin-like 120 kDa protein, mitochondrial OS=Homo sapiens OX=9606 GN=OPA1 PE=1 SV=3	ND	1.04167	0.79365	0.9901	0.941807	0.130873	-0.0864972
1421	Q13557	273	KCC2D_HUMAN Calcium/calmodulin-dependent protein kinase type II subunit delta OS=Homo sapiens OX=9606 GN=CAMK2D PE=1 SV=3	ND	1.06383	ND	0.81967	0.94175	0.172647	-0.086584
1422	Q8ND24	655	RN214_HUMAN RING finger protein 214 OS=Homo sapiens OX=9606 GN=RNF214 PE=1 SV=2	ND	0.89286	0.9901	ND	0.94148	0.0687591	-0.0869976
1423	O43663	531	PRC1_HUMAN Protein regulator of cytokinesis 1 OS=Homo sapiens OX=9606 GN=PRC1 PE=1 SV=2	0.9434	0.90909	0.97087	ND	0.94112	0.030953	-0.0875494
1424	Q09666	5502	AHNK_HUMAN Neuroblast differentiation-associated protein AHNAK OS=Homo sapiens OX=9606 GN=AHNAK PE=1 SV=2	0.94645	ND	ND	0.93458	0.940515	0.00839336	-0.0884771
1425	P02545	591	LMNA_HUMAN Prelamin-A/C OS=Homo sapiens OX=9606 GN=LMNA PE=1 SV=1	ND	0.9578	0.97087	0.89286	0.94051	0.0417804	-0.0884848
1426	O96008	74	TOM40_HUMAN Mitochondrial import receptor subunit TOM40 homolog OS=Homo sapiens OX=9606 GN=TOMM40 PE=1 SV=1	0.9213	0.9044	0.93502	1	0.94018	0.0418	-0.0889911
1427	P51790	733	CLCN3_HUMAN H(+)/Cl(-) exchange transporter 3 OS=Homo sapiens OX=9606 GN=CLCN3 PE=1 SV=2	ND	0.97124	0.90909	ND	0.940165	0.0439467	-0.0890141
1428	B2RTY4	1612	MYO9A_HUMAN Unconventional myosin-IXa OS=Homo sapiens OX=9606 GN=MYO9A PE=1 SV=2	ND	ND	0.97087	0.90909	0.93998	0.0436851	-0.089298
1429	Q9HBB9	1022	Q9HBB9_HUMAN HC56 OS=Homo sapiens OX=9606 PE=4 SV=1	1.03093	0.86207	0.92593	0.93954	0.939617	0.0696155	-0.0898545
1430	P29317	612	EPHA2_HUMAN Ephrin type-A receptor 2 OS=Homo sapiens OX=9606 GN=EPHA2 PE=1 SV=2	0.9009	0.90917	0.96721	0.98039	0.939418	0.0402065	-0.0901616
1431	Q5T7W0	202	ZN618_HUMAN Zinc finger protein 618 OS=Homo sapiens OX=9606 GN=ZNF618 PE=1 SV=1	ND	0.95238	ND	0.92593	0.939155	0.018703	-0.0905648
1432	M0QYT0	89	M0QYT0_HUMAN Uncharacterized protein (Fragment) OS=Homo sapiens OX=9606 PE=1 SV=1	ND	ND	ND	0.93912	0.93912		-0.0906186
1433	O95372	213	LYPA2_HUMAN Acyl-protein thioesterase 2 OS=Homo sapiens OX=9606 GN=LYPLA2 PE=1 SV=1	ND	0.9434	ND	0.93458	0.93899	0.00623668	-0.0908183
1434	Q9NZB2	1103	F120A_HUMAN Constitutive coactivator of PPAR-gamma-like protein 1 OS=Homo sapiens OX=9606 GN=FAM120A PE=1 SV=2	1.00219	0.91326	ND	0.9009	0.938783	0.0552585	-0.0911359
1435	Q00610	870	CLH1_HUMAN Clathrin heavy chain 1 OS=Homo sapiens OX=9606 GN=CLTC PE=1 SV=5	0.97881	0.92382	0.9428	0.90962	0.938762	0.0299592	-0.0911679
1436	Q9H825	146	METL8_HUMAN Methyltransferase-like protein 8 OS=Homo sapiens OX=9606 GN=METTL8 PE=2 SV=2	ND	ND	1	0.87719	0.938595	0.0868398	-0.0914253
1437	Q9UKV3	733	ACINU_HUMAN Apoptotic chromatin condensation inducer in the nucleus OS=Homo sapiens OX=9606 GN=ACIN1 PE=1 SV=2	1	0.87719	ND	ND	0.938595	0.0868398	-0.0914253
1438	Q15149	3110	PLEC_HUMAN Plectin OS=Homo sapiens OX=9606 GN=PLEC PE=1 SV=3	ND	0.89286	0.90909	1.0101	0.93735	0.0635238	-0.0933403
1439	Q10713	466	MPPA_HUMAN Mitochondrial-processing peptidase subunit alpha OS=Homo sapiens OX=9606 GN=PMPCA PE=1 SV=2	0.9901	0.88296	ND	ND	0.93653	0.0757594	-0.0946029
1440	P51808	8	DYLT3_HUMAN Dynein light chain Tctex-type 3 OS=Homo sapiens OX=9606 GN=DYNLT3 PE=1 SV=1	ND	0.80921	1.06383	ND	0.93652	0.180044	-0.0946183
1441	P98194	49	AT2C1_HUMAN Calcium-transporting ATPase type 2C member 1 OS=Homo sapiens OX=9606 GN=ATP2C1 PE=1 SV=3	0.81967	0.93888	1.00625	0.98039	0.936298	0.0825553	-0.0949611
1442	Q00653	57	NFKB2_HUMAN Nuclear factor NF-kappa-B p100 subunit OS=Homo sapiens OX=9606 GN=NFKB2 PE=1 SV=4	0.91743	0.92593	0.98426	0.91743	0.936262	0.0322482	-0.095015
1443	P56182	274	RRP1_HUMAN Ribosomal RNA processing protein 1 homolog A OS=Homo sapiens OX=9606 GN=RRP1 PE=1 SV=1	0.94326	0.87465	0.95244	0.97405	0.9361	0.0429518	-0.0952654
1444	Q9Y2Z0	49	SGT1_HUMAN Protein SGT1 homolog OS=Homo sapiens OX=9606 GN=SUGT1 PE=1 SV=3	ND	0.86207	ND	1.0101	0.936085	0.104673	-0.0952886
1445	Q9Y4W2	316	LAS1L_HUMAN Ribosomal biogenesis protein LAS1L OS=Homo sapiens OX=9606 GN=LAS1L PE=1 SV=2	0.9901	0.9434	0.89286	0.91743	0.935948	0.0415831	-0.0955005
1446	Q16666	191	IF16_HUMAN Gamma-interferon-inducible protein 16 OS=Homo sapiens OX=9606 GN=IFI16 PE=1 SV=3	0.98039	ND	0.90909	0.91743	0.935637	0.0389812	-0.0959797
1447	P46821	2041	MAP1B_HUMAN Microtubule-associated protein 1B OS=Homo sapiens OX=9606 GN=MAP1B PE=1 SV=2	ND	0.87114	1	ND	0.93557	0.0911178	-0.0960825
1448	P33981	269	TTK_HUMAN Dual specificity protein kinase TTK OS=Homo sapiens OX=9606 GN=TTK PE=1 SV=2	ND	1.06383	0.80645	ND	0.93514	0.181995	-0.0967457
1449	Q6NW34	492	NEPRO_HUMAN Nucleolus and neural progenitor protein OS=Homo sapiens OX=9606 GN=NEPRO PE=1 SV=3	ND	0.86957	ND	1	0.934785	0.0922279	-0.0972935
1450	O60927	61	PP1RB_HUMAN E3 ubiquitin-protein ligase PPP1R11 OS=Homo sapiens OX=9606 GN=PPP1R11 PE=1 SV=1	ND	ND	0.93458	ND	0.93458		-0.0976099	Mutagenesis	Note=Loss of function in inducing TLR2 degradation. CCC->SSS;Ontology_term=ECO:0000269;evidence=ECO:0000269|PubMed:27805901;Dbxref=PMID:27805901
1451	O75170	665	PP6R2_HUMAN Serine/threonine-protein phosphatase 6 regulatory subunit 2 OS=Homo sapiens OX=9606 GN=PPP6R2 PE=1 SV=2	ND	0.93458	ND	ND	0.93458		-0.0976099
1452	P14618	424	KPYM_HUMAN Pyruvate kinase PKM OS=Homo sapiens OX=9606 GN=PKM PE=1 SV=4	0.93458	ND	ND	ND	0.93458		-0.0976099
1453	P55060	85	XPO2_HUMAN Exportin-2 OS=Homo sapiens OX=9606 GN=CSE1L PE=1 SV=3	ND	ND	0.93458	ND	0.93458		-0.0976099
1454	Q14699	551	RFTN1_HUMAN Raftlin OS=Homo sapiens OX=9606 GN=RFTN1 PE=1 SV=4	ND	0.93458	ND	ND	0.93458		-0.0976099
1455	Q15032	1031	R3HD1_HUMAN R3H domain-containing protein 1 OS=Homo sapiens OX=9606 GN=R3HDM1 PE=1 SV=3	ND	ND	ND	0.93458	0.93458		-0.0976099
1456	Q15032	1032	R3HD1_HUMAN R3H domain-containing protein 1 OS=Homo sapiens OX=9606 GN=R3HDM1 PE=1 SV=3	ND	ND	ND	0.93458	0.93458		-0.0976099
1457	Q9H5N1	372	RABE2_HUMAN Rab GTPase-binding effector protein 2 OS=Homo sapiens OX=9606 GN=RABEP2 PE=1 SV=2	ND	ND	0.93458	ND	0.93458		-0.0976099
1458	Q9Y223	357	GLCNE_HUMAN Bifunctional UDP-N-acetylglucosamine 2-epimerase/N-acetylmannosamine kinase OS=Homo sapiens OX=9606 GN=GNE PE=1 SV=1	ND	ND	ND	0.93458	0.93458		-0.0976099
1459	Q9Y2X0	790	MED16_HUMAN Mediator of RNA polymerase II transcription subunit 16 OS=Homo sapiens OX=9606 GN=MED16 PE=1 SV=2	ND	ND	0.93458	ND	0.93458		-0.0976099
1460	Q8N1G2	9	CMTR1_HUMAN Cap-specific mRNA (nucleoside-2'-O-)-methyltransferase 1 OS=Homo sapiens OX=9606 GN=CMTR1 PE=1 SV=1	ND	0.88848	0.98039	ND	0.934435	0.0649902	-0.0978338
1461	Q9ULX6	211	AKP8L_HUMAN A-kinase anchor protein 8-like OS=Homo sapiens OX=9606 GN=AKAP8L PE=1 SV=3	0.96154	0.9504	0.87719	0.94858	0.934427	0.038586	-0.0978454
1462	Q9C0C2	1175	TB182_HUMAN 182 kDa tankyrase-1-binding protein OS=Homo sapiens OX=9606 GN=TNKS1BP1 PE=1 SV=4	ND	0.79365	0.98919	1.02041	0.934417	0.122903	-0.0978621
1463	Q3KR37	210	GRM1B_HUMAN GRAM domain-containing protein 1B OS=Homo sapiens OX=9606 GN=GRAMD1B PE=1 SV=1	1.02041	ND	ND	0.84746	0.933935	0.122294	-0.098606
1464	Q13501	128	SQSTM_HUMAN Sequestosome-1 OS=Homo sapiens OX=9606 GN=SQSTM1 PE=1 SV=1	0.97087	0.71942	ND	1.11111	0.9338	0.198459	-0.0988145
1465	Q04656	160	ATP7A_HUMAN Copper-transporting ATPase 1 OS=Homo sapiens OX=9606 GN=ATP7A PE=1 SV=3	ND	0.87719	0.97087	0.95238	0.93348	0.0496175	-0.099309
1466	P17812	491	PYRG1_HUMAN CTP synthase 1 OS=Homo sapiens OX=9606 GN=CTPS1 PE=1 SV=2	0.91743	0.89286	ND	0.9901	0.933463	0.0505639	-0.0993347
1467	P35658	1003	NU214_HUMAN Nuclear pore complex protein Nup214 OS=Homo sapiens OX=9606 GN=NUP214 PE=1 SV=2	1.08696	0.84846	0.93422	0.86249	0.933032	0.109276	-0.100001
1468	Q8IV50	106	LYSM2_HUMAN LysM and putative peptidoglycan-binding domain-containing protein 2 OS=Homo sapiens OX=9606 GN=LYSMD2 PE=1 SV=1	ND	0.96154	0.93662	0.9009	0.93302	0.0304799	-0.10002
1469	P63220	17	RS21_HUMAN 40S ribosomal protein S21 OS=Homo sapiens OX=9606 GN=RPS21 PE=1 SV=1	ND	0.8547	1.0101	ND	0.9324	0.109884	-0.100979
1470	P49458	48	SRP09_HUMAN Signal recognition particle 9 kDa protein OS=Homo sapiens OX=9606 GN=SRP9 PE=1 SV=2	0.93458	0.86957	0.9901	0.93458	0.932207	0.0492824	-0.101277
1471	O75940	214	SPF30_HUMAN Survival of motor neuron-related-splicing factor 30 OS=Homo sapiens OX=9606 GN=SMNDC1 PE=1 SV=1	0.81967	1.0104	0.85476	1.04167	0.931625	0.110691	-0.102179
1472	Q9H4A3	547	WNK1_HUMAN Serine/threonine-protein kinase WNK1 OS=Homo sapiens OX=9606 GN=WNK1 PE=1 SV=2	0.96154	0.83333	ND	1	0.931623	0.0872696	-0.102181
1473	P04843	477	RPN1_HUMAN Dolichyl-diphosphooligosaccharide--protein glycosyltransferase subunit 1 OS=Homo sapiens OX=9606 GN=RPN1 PE=1 SV=1	0.81301	1.16279	0.80645	0.9434	0.931412	0.166647	-0.102508
1474	Q9Y4C1	695	KDM3A_HUMAN Lysine-specific demethylase 3A OS=Homo sapiens OX=9606 GN=KDM3A PE=1 SV=4	ND	1.08696	0.77519	ND	0.931075	0.220455	-0.103031
1475	Q96FZ2	39	HMCES_HUMAN Embryonic stem cell-specific 5-hydroxymethylcytosine-binding protein OS=Homo sapiens OX=9606 GN=HMCES PE=1 SV=1	0.75188	1.03093	ND	1.0101	0.93097	0.155446	-0.103193
1476	O95861	42	BPNT1_HUMAN 3'(2'),5'-bisphosphate nucleotidase 1 OS=Homo sapiens OX=9606 GN=BPNT1 PE=1 SV=1	0.91743	0.84034	0.9434	1.02041	0.930395	0.0742739	-0.104085
1477	Q9Y5X2	200	SNX8_HUMAN Sorting nexin-8 OS=Homo sapiens OX=9606 GN=SNX8 PE=1 SV=1	ND	0.84803	0.98566	0.95696	0.930217	0.0726079	-0.104361
1478	Q5JTH9	31	RRP12_HUMAN RRP12-like protein OS=Homo sapiens OX=9606 GN=RRP12 PE=1 SV=2	0.83333	0.98714	1.05231	0.84746	0.93006	0.107056	-0.104604
1479	P49585	73	PCY1A_HUMAN Choline-phosphate cytidylyltransferase A OS=Homo sapiens OX=9606 GN=PCYT1A PE=1 SV=2	1.05263	0.80645	ND	ND	0.92954	0.174076	-0.105411
1480	Q16630	159	CPSF6_HUMAN Cleavage and polyadenylation specificity factor subunit 6 OS=Homo sapiens OX=9606 GN=CPSF6 PE=1 SV=2	0.92026	0.94482	0.84977	0.99588	0.927682	0.0607455	-0.108297
1481	Q15233	145	NONO_HUMAN Non-POU domain-containing octamer-binding protein OS=Homo sapiens OX=9606 GN=NONO PE=1 SV=4	1.04167	0.81801	0.86989	0.98039	0.92749	0.101881	-0.108596
1482	Q9BXB5	33	OSB10_HUMAN Oxysterol-binding protein-related protein 10 OS=Homo sapiens OX=9606 GN=OSBPL10 PE=1 SV=2	ND	0.94133	0.96319	0.87772	0.927413	0.044402	-0.108716
1483	Q9H0A0	658	NAT10_HUMAN RNA cytidine acetyltransferase OS=Homo sapiens OX=9606 GN=NAT10 PE=1 SV=2	0.89222	0.9628	0.94705	0.90654	0.927153	0.0332255	-0.109121
1484	Q9H981	151	ARP8_HUMAN Actin-related protein 8 OS=Homo sapiens OX=9606 GN=ACTR8 PE=1 SV=2	ND	ND	0.98455	0.86947	0.92701	0.0813738	-0.109343
1485	Q9NQC3	1101	RTN4_HUMAN Reticulon-4 OS=Homo sapiens OX=9606 GN=RTN4 PE=1 SV=2	0.84905	1.00495	1.03395	0.81967	0.926905	0.108183	-0.109507
1486	P46821	2065	MAP1B_HUMAN Microtubule-associated protein 1B OS=Homo sapiens OX=9606 GN=MAP1B PE=1 SV=2	ND	0.9901	0.93458	0.85526	0.926647	0.0677692	-0.109909
1487	Q76FK4	172	NOL8_HUMAN Nucleolar protein 8 OS=Homo sapiens OX=9606 GN=NOL8 PE=1 SV=1	ND	0.8	1.05263	ND	0.926315	0.178636	-0.110425
1488	O75439	265	MPPB_HUMAN Mitochondrial-processing peptidase subunit beta OS=Homo sapiens OX=9606 GN=PMPCB PE=1 SV=2	0.95417	0.95238	0.86207	0.93608	0.926175	0.0435047	-0.110643
1489	Q12986	92	NFX1_HUMAN Transcriptional repressor NF-X1 OS=Homo sapiens OX=9606 GN=NFX1 PE=1 SV=2	ND	0.90984	0.94251	ND	0.926175	0.0231012	-0.110643
1490	Q8IYQ7	277	THNS1_HUMAN Threonine synthase-like 1 OS=Homo sapiens OX=9606 GN=THNSL1 PE=1 SV=2	ND	0.84034	1.07601	0.86207	0.92614	0.130245	-0.110698
1491	A0A024R9D8	380	A0A024R9D8_HUMAN Sperm associated antigen 1, isoform CRA_b OS=Homo sapiens OX=9606 GN=SPAG1 PE=4 SV=1	ND	0.9901	0.86207	ND	0.926085	0.0905309	-0.110783
1492	Q9Y546	350	LRC42_HUMAN Leucine-rich repeat-containing protein 42 OS=Homo sapiens OX=9606 GN=LRRC42 PE=1 SV=1	ND	0.92608	ND	ND	0.92608		-0.110791
1493	Q9Y4B5	507	MTCL1_HUMAN Microtubule cross-linking factor 1 OS=Homo sapiens OX=9606 GN=MTCL1 PE=1 SV=5	0.93458	0.83333	ND	1.0101	0.926003	0.0886965	-0.110911
1494	P26358	1478	DNMT1_HUMAN DNA (cytosine-5)-methyltransferase 1 OS=Homo sapiens OX=9606 GN=DNMT1 PE=1 SV=2	0.95238	ND	0.8547	0.97087	0.925983	0.0624216	-0.110942
1495	H7C6B9	214	H7C6B9_HUMAN cDNA FLJ56774, highly similar to RNA polymerase I-specific transcription initiation factor RRN3 OS=Homo sapiens OX=9606 PE=2 SV=1	ND	ND	ND	0.92593	0.92593		-0.111025
1496	O60292	407	SI1L3_HUMAN Signal-induced proliferation-associated 1-like protein 3 OS=Homo sapiens OX=9606 GN=SIPA1L3 PE=1 SV=3	0.92593	ND	ND	ND	0.92593		-0.111025
1497	O96013	276	PAK4_HUMAN Serine/threonine-protein kinase PAK 4 OS=Homo sapiens OX=9606 GN=PAK4 PE=1 SV=1	ND	0.92593	ND	ND	0.92593		-0.111025
1498	Q01082	112	SPTB2_HUMAN Spectrin beta chain, non-erythrocytic 1 OS=Homo sapiens OX=9606 GN=SPTBN1 PE=1 SV=2	ND	0.92593	ND	ND	0.92593		-0.111025
1499	Q03701	411	CEBPZ_HUMAN CCAAT/enhancer-binding protein zeta OS=Homo sapiens OX=9606 GN=CEBPZ PE=1 SV=3	ND	0.92593	ND	ND	0.92593		-0.111025
1500	Q14204	3940	DYHC1_HUMAN Cytoplasmic dynein 1 heavy chain 1 OS=Homo sapiens OX=9606 GN=DYNC1H1 PE=1 SV=5	ND	0.92593	ND	ND	0.92593		-0.111025
1501	Q8IV63	128	VRK3_HUMAN Inactive serine/threonine-protein kinase VRK3 OS=Homo sapiens OX=9606 GN=VRK3 PE=1 SV=2	ND	ND	ND	0.92593	0.92593		-0.111025
1502	Q8IWV7	180	UBR1_HUMAN E3 ubiquitin-protein ligase UBR1 OS=Homo sapiens OX=9606 GN=UBR1 PE=1 SV=1	ND	ND	0.92593	ND	0.92593		-0.111025
1503	Q9BZF1	266	OSBL8_HUMAN Oxysterol-binding protein-related protein 8 OS=Homo sapiens OX=9606 GN=OSBPL8 PE=1 SV=3	ND	ND	ND	0.92593	0.92593		-0.111025
1504	Q9NQC7	655	CYLD_HUMAN Ubiquitin carboxyl-terminal hydrolase CYLD OS=Homo sapiens OX=9606 GN=CYLD PE=1 SV=1	ND	ND	0.92593	ND	0.92593		-0.111025
1505	Q8IVT2	491	MISP_HUMAN Mitotic interactor and substrate of PLK1 OS=Homo sapiens OX=9606 GN=MISP PE=1 SV=1	0.90486	0.91228	0.93222	0.9532	0.92564	0.0217037	-0.111477
1506	P78527	2342	PRKDC_HUMAN DNA-dependent protein kinase catalytic subunit OS=Homo sapiens OX=9606 GN=PRKDC PE=1 SV=3	0.9901	ND	0.9009	0.88496	0.92532	0.0566644	-0.111976
1507	Q32NC0	175	CR021_HUMAN UPF0711 protein C18orf21 OS=Homo sapiens OX=9606 GN=C18orf21 PE=1 SV=1	ND	ND	ND	0.92406	0.92406		-0.113942
1508	Q9BYT8	153	NEUL_HUMAN Neurolysin, mitochondrial OS=Homo sapiens OX=9606 GN=NLN PE=1 SV=1	1.0101	0.82645	1.02494	0.83349	0.923745	0.108489	-0.114433
1509	Q9HBM0	41	VEZA_HUMAN Vezatin OS=Homo sapiens OX=9606 GN=VEZT PE=1 SV=3	ND	0.96154	ND	0.88496	0.92325	0.0541502	-0.115207
1510	Q9Y314	8	NOSIP_HUMAN Nitric oxide synthase-interacting protein OS=Homo sapiens OX=9606 GN=NOSIP PE=1 SV=1	0.82645	ND	0.9901	0.95238	0.922977	0.0856957	-0.115634
1511	Q96JN8	57	NEUL4_HUMAN Neuralized-like protein 4 OS=Homo sapiens OX=9606 GN=NEURL4 PE=1 SV=2	0.95238	ND	0.96154	0.8547	0.922873	0.0592172	-0.115795
1512	Q16637	60	SMN_HUMAN Survival motor neuron protein OS=Homo sapiens OX=9606 GN=SMN1 PE=1 SV=1	0.83537	ND	ND	1.0101	0.922735	0.123553	-0.116012
1513	P27816	67	MAP4_HUMAN Microtubule-associated protein 4 OS=Homo sapiens OX=9606 GN=MAP4 PE=1 SV=3	0.98596	0.95238	0.83356	0.9182	0.922525	0.0654441	-0.11634
1514	P49327	1448	FAS_HUMAN Fatty acid synthase OS=Homo sapiens OX=9606 GN=FASN PE=1 SV=3	0.93575	ND	0.90589	0.92593	0.922523	0.0152187	-0.116343
1515	O75410	482	TACC1_HUMAN Transforming acidic coiled-coil-containing protein 1 OS=Homo sapiens OX=9606 GN=TACC1 PE=1 SV=2	ND	0.86207	0.95238	0.95238	0.922277	0.0521405	-0.116728
1516	P53701	66	CCHL_HUMAN Cytochrome c-type heme lyase OS=Homo sapiens OX=9606 GN=HCCS PE=1 SV=1	1.03451	ND	0.75758	0.97432	0.922137	0.145653	-0.116948
1517	Q15746	297	MYLK_HUMAN Myosin light chain kinase, smooth muscle OS=Homo sapiens OX=9606 GN=MYLK PE=1 SV=4	ND	ND	0.81301	1.03093	0.92197	0.154093	-0.117208
1518	O75821	25	EIF3G_HUMAN Eukaryotic translation initiation factor 3 subunit G OS=Homo sapiens OX=9606 GN=EIF3G PE=1 SV=2	ND	0.83333	1.0101	ND	0.921715	0.124995	-0.117607
1519	Q3KQU3	373	MA7D1_HUMAN MAP7 domain-containing protein 1 OS=Homo sapiens OX=9606 GN=MAP7D1 PE=1 SV=1	0.88496	0.93864	0.90968	0.95238	0.921415	0.0301231	-0.118077
1520	P21980	545	TGM2_HUMAN Protein-glutamine gamma-glutamyltransferase 2 OS=Homo sapiens OX=9606 GN=TGM2 PE=1 SV=2	0.87719	0.95238	0.93458	ND	0.921383	0.0392937	-0.118127
1521	Q14204	633	DYHC1_HUMAN Cytoplasmic dynein 1 heavy chain 1 OS=Homo sapiens OX=9606 GN=DYNC1H1 PE=1 SV=5	0.94985	ND	0.89286	ND	0.921355	0.040298	-0.118171
1522	O75448	110	MED24_HUMAN Mediator of RNA polymerase II transcription subunit 24 OS=Homo sapiens OX=9606 GN=MED24 PE=1 SV=1	ND	0.86207	0.98039	ND	0.92123	0.0836649	-0.118367
1523	O60343	316	TBCD4_HUMAN TBC1 domain family member 4 OS=Homo sapiens OX=9606 GN=TBC1D4 PE=1 SV=2	ND	0.84034	0.9009	1.02041	0.92055	0.0916291	-0.119432
1524	A4D1P6	366	WDR91_HUMAN WD repeat-containing protein 91 OS=Homo sapiens OX=9606 GN=WDR91 PE=1 SV=2	ND	0.97087	0.87719	0.91341	0.92049	0.0472396	-0.119526
1525	A7MD96	835	A7MD96_HUMAN SYNPO protein (Fragment) OS=Homo sapiens OX=9606 GN=SYNPO PE=2 SV=1	1.05263	0.86515	0.8547	0.9056	0.91952	0.0914144	-0.121047
1526	P54136	32	SYRC_HUMAN Arginine--tRNA ligase, cytoplasmic OS=Homo sapiens OX=9606 GN=RARS PE=1 SV=2	ND	0.86207	0.95238	0.9434	0.919283	0.0497512	-0.121419
1527	O75683	189	SURF6_HUMAN Surfeit locus protein 6 OS=Homo sapiens OX=9606 GN=SURF6 PE=1 SV=3	0.89947	ND	0.95238	0.905	0.91895	0.029083	-0.121942
1528	O15014	178	ZN609_HUMAN Zinc finger protein 609 OS=Homo sapiens OX=9606 GN=ZNF609 PE=1 SV=2	0.84034	0.92593	0.9901	ND	0.91879	0.0751349	-0.122193
1529	Q16875	440	F263_HUMAN 6-phosphofructo-2-kinase/fructose-2,6-bisphosphatase 3 OS=Homo sapiens OX=9606 GN=PFKFB3 PE=1 SV=1	ND	0.91867	ND	ND	0.91867		-0.122381
1530	P48506	553	GSH1_HUMAN Glutamate--cysteine ligase catalytic subunit OS=Homo sapiens OX=9606 GN=GCLC PE=1 SV=2	ND	0.95273	0.86855	0.93458	0.91862	0.0443013	-0.12246
1531	Q9H2G2	1212	SLK_HUMAN STE20-like serine/threonine-protein kinase OS=Homo sapiens OX=9606 GN=SLK PE=1 SV=1	ND	ND	0.91782	ND	0.91782		-0.123717
1532	P21333	1157	FLNA_HUMAN Filamin-A OS=Homo sapiens OX=9606 GN=FLNA PE=1 SV=4	0.70526	0.73529	0.76003	1.47059	0.917793	0.369211	-0.12376
1533	Q6PL18	1156	ATAD2_HUMAN ATPase family AAA domain-containing protein 2 OS=Homo sapiens OX=9606 GN=ATAD2 PE=1 SV=1	ND	0.9009	0.93458	ND	0.91774	0.0238154	-0.123843
1534	Q14789	1811	GOGB1_HUMAN Golgin subfamily B member 1 OS=Homo sapiens OX=9606 GN=GOLGB1 PE=1 SV=2	ND	ND	0.98039	0.8547	0.917545	0.0888763	-0.124149
1535	O15357	926	SHIP2_HUMAN Phosphatidylinositol 3,4,5-trisphosphate 5-phosphatase 2 OS=Homo sapiens OX=9606 GN=INPPL1 PE=1 SV=2	ND	0.90909	ND	0.92593	0.91751	0.0119077	-0.124204
1536	O75928	441	PIAS2_HUMAN E3 SUMO-protein ligase PIAS2 OS=Homo sapiens OX=9606 GN=PIAS2 PE=1 SV=3	ND	ND	0.91743	ND	0.91743		-0.12433
1537	Q96II8	531	LRCH3_HUMAN Leucine-rich repeat and calponin homology domain-containing protein 3 OS=Homo sapiens OX=9606 GN=LRCH3 PE=1 SV=2	ND	0.91743	ND	ND	0.91743		-0.12433
1538	Q9C0C9	406	UBE2O_HUMAN (E3-independent) E2 ubiquitin-conjugating enzyme OS=Homo sapiens OX=9606 GN=UBE2O PE=1 SV=3	ND	ND	0.91743	ND	0.91743		-0.12433
1539	Q9H0G5	232	NSRP1_HUMAN Nuclear speckle splicing regulatory protein 1 OS=Homo sapiens OX=9606 GN=NSRP1 PE=1 SV=1	ND	ND	ND	0.91743	0.91743		-0.12433
1540	Q9UJY1	10	HSPB8_HUMAN Heat shock protein beta-8 OS=Homo sapiens OX=9606 GN=HSPB8 PE=1 SV=1	0.91743	ND	ND	ND	0.91743		-0.12433
1541	Q9Y520	177	PRC2C_HUMAN Protein PRRC2C OS=Homo sapiens OX=9606 GN=PRRC2C PE=1 SV=4	ND	0.91743	ND	ND	0.91743		-0.12433
1542	P31943	267	HNRH1_HUMAN Heterogeneous nuclear ribonucleoprotein H OS=Homo sapiens OX=9606 GN=HNRNPH1 PE=1 SV=4	0.88648	0.9323	0.97995	0.87073	0.917365	0.0492228	-0.124432
1543	Q9Y2X3	439	NOP58_HUMAN Nucleolar protein 58 OS=Homo sapiens OX=9606 GN=NOP58 PE=1 SV=1	ND	0.98544	0.9118	0.8547	0.917313	0.0655441	-0.124513
1544	A0A1C7CYX9	35	A0A1C7CYX9_HUMAN Dihydropyrimidinase-related protein 2 OS=Homo sapiens OX=9606 GN=DPYSL2 PE=1 SV=1	ND	0.83333	1	0.91743	0.91692	0.0833362	-0.125132
1545	Q9NRG4	13	SMYD2_HUMAN N-lysine methyltransferase SMYD2 OS=Homo sapiens OX=9606 GN=SMYD2 PE=1 SV=2	ND	ND	0.86207	0.97087	0.91647	0.0769332	-0.12584
1546	P42166	280	LAP2A_HUMAN Lamina-associated polypeptide 2, isoform alpha OS=Homo sapiens OX=9606 GN=TMPO PE=1 SV=2	0.92593	0.92593	ND	0.89688	0.916247	0.016772	-0.126192
1547	P04083	324	ANXA1_HUMAN Annexin A1 OS=Homo sapiens OX=9606 GN=ANXA1 PE=1 SV=2	0.78458	0.96954	0.9804	0.93036	0.91622	0.0903532	-0.126234	Disulfide bond	Ontology_term=ECO:0000250;evidence=ECO:0000250|UniProtKB:P19619
1548	Q86V48	138	LUZP1_HUMAN Leucine zipper protein 1 OS=Homo sapiens OX=9606 GN=LUZP1 PE=1 SV=2	0.86207	0.93458	0.84746	1.02041	0.91613	0.0792733	-0.126376
1549	Q99541	302	PLIN2_HUMAN Perilipin-2 OS=Homo sapiens OX=9606 GN=PLIN2 PE=1 SV=2	0.84034	0.97087	0.93458	ND	0.915263	0.0673749	-0.127741
1550	Q08378	455	GOGA3_HUMAN Golgin subfamily A member 3 OS=Homo sapiens OX=9606 GN=GOLGA3 PE=1 SV=2	0.84746	ND	0.98291	ND	0.915185	0.0957776	-0.127865
1551	Q9Y277	36	VDAC3_HUMAN Voltage-dependent anion-selective channel protein 3 OS=Homo sapiens OX=9606 GN=VDAC3 PE=1 SV=1	0.89373	0.86076	0.92369	0.98105	0.914807	0.0510959	-0.12846
1552	O95571	170	ETHE1_HUMAN Persulfide dioxygenase ETHE1, mitochondrial OS=Homo sapiens OX=9606 GN=ETHE1 PE=1 SV=2	0.9009	ND	0.92593	ND	0.913415	0.0176989	-0.130658
1553	Q96GE4	276	CEP95_HUMAN Centrosomal protein of 95 kDa OS=Homo sapiens OX=9606 GN=CEP95 PE=1 SV=1	ND	ND	0.92593	0.9009	0.913415	0.0176989	-0.130658
1554	O95994	81	AGR2_HUMAN Anterior gradient protein 2 homolog OS=Homo sapiens OX=9606 GN=AGR2 PE=1 SV=1	0.91743	0.89702	0.93734	0.90185	0.91341	0.0181757	-0.130666	Mutagenesis	Note=Loss of interaction with MUC2. C->S;Ontology_term=ECO:0000269;evidence=ECO:0000269|PubMed:19359471;Dbxref=PMID:19359471
1555	Q9Y6I9	165	TX264_HUMAN Testis-expressed protein 264 OS=Homo sapiens OX=9606 GN=TEX264 PE=1 SV=1	0.90909	ND	0.91743	ND	0.91326	0.00589727	-0.130902
1556	P49327	1186	FAS_HUMAN Fatty acid synthase OS=Homo sapiens OX=9606 GN=FASN PE=1 SV=3	ND	0.96154	0.89286	0.88496	0.91312	0.0421186	-0.131124
1557	Q14527	461	HLTF_HUMAN Helicase-like transcription factor OS=Homo sapiens OX=9606 GN=HLTF PE=1 SV=2	1.04167	ND	0.86391	0.83333	0.91297	0.112501	-0.131361
1558	O15056	1182	SYNJ2_HUMAN Synaptojanin-2 OS=Homo sapiens OX=9606 GN=SYNJ2 PE=1 SV=3	ND	ND	0.72464	1.0989	0.91177	0.264642	-0.133258
1559	Q9HCU5	128	PREB_HUMAN Prolactin regulatory element-binding protein OS=Homo sapiens OX=9606 GN=PREB PE=1 SV=2	0.84746	0.86957	0.92593	1.00053	0.910872	0.0682941	-0.134679
1560	O75369	991	FLNB_HUMAN Filamin-B OS=Homo sapiens OX=9606 GN=FLNB PE=1 SV=2	ND	0.94406	ND	0.87719	0.910625	0.0472842	-0.135071
1561	Q86Y56	138	DAAF5_HUMAN Dynein assembly factor 5, axonemal OS=Homo sapiens OX=9606 GN=DNAAF5 PE=1 SV=4	ND	0.91048	ND	ND	0.91048		-0.135301
1562	Q9C0I1	67	MTMRC_HUMAN Myotubularin-related protein 12 OS=Homo sapiens OX=9606 GN=MTMR12 PE=1 SV=2	ND	0.98039	0.84034	ND	0.910365	0.0990303	-0.135483
1563	P53701	46	CCHL_HUMAN Cytochrome c-type heme lyase OS=Homo sapiens OX=9606 GN=HCCS PE=1 SV=1	0.95238	0.89797	0.86697	0.92315	0.910118	0.0363558	-0.135875
1564	Q12765	324	SCRN1_HUMAN Secernin-1 OS=Homo sapiens OX=9606 GN=SCRN1 PE=1 SV=2	1.04167	0.78754	0.99677	0.81301	0.909748	0.128153	-0.136462
1565	Q8TEW0	921	PARD3_HUMAN Partitioning defective 3 homolog OS=Homo sapiens OX=9606 GN=PARD3 PE=1 SV=2	0.9901	0.86957	ND	0.86957	0.909747	0.069588	-0.136463
1566	A0A024R4E5	948	A0A024R4E5_HUMAN High density lipoprotein binding protein (Vigilin), isoform CRA_a OS=Homo sapiens OX=9606 GN=HDLBP PE=1 SV=1	0.88496	ND	0.93458	0.90909	0.909543	0.0248131	-0.136786
1567	Q00765	18	REEP5_HUMAN Receptor expression-enhancing protein 5 OS=Homo sapiens OX=9606 GN=REEP5 PE=1 SV=3	ND	ND	0.91743	0.90164	0.909535	0.0111652	-0.136799
1568	P04150	287	GCR_HUMAN Glucocorticoid receptor OS=Homo sapiens OX=9606 GN=NR3C1 PE=1 SV=1	0.78125	1.2987	0.72464	0.83333	0.90948	0.263249	-0.136886
1569	H7C0N4	26	H7C0N4_HUMAN Splicing factor 1 (Fragment) OS=Homo sapiens OX=9606 GN=SF1 PE=1 SV=1	ND	0.92593	0.89286	ND	0.909395	0.023384	-0.137021
1570	O43542	310	XRCC3_HUMAN DNA repair protein XRCC3 OS=Homo sapiens OX=9606 GN=XRCC3 PE=1 SV=1	ND	0.90909	ND	ND	0.90909		-0.137505
1571	P20810	241	ICAL_HUMAN Calpastatin OS=Homo sapiens OX=9606 GN=CAST PE=1 SV=4	ND	ND	ND	0.90909	0.90909		-0.137505
1572	P42695	613	CNDD3_HUMAN Condensin-2 complex subunit D3 OS=Homo sapiens OX=9606 GN=NCAPD3 PE=1 SV=2	ND	ND	0.90909	ND	0.90909		-0.137505
1573	P45880	227	VDAC2_HUMAN Voltage-dependent anion-selective channel protein 2 OS=Homo sapiens OX=9606 GN=VDAC2 PE=1 SV=2	ND	ND	0.90909	ND	0.90909		-0.137505
1574	Q5VIR6	365	VPS53_HUMAN Vacuolar protein sorting-associated protein 53 homolog OS=Homo sapiens OX=9606 GN=VPS53 PE=1 SV=1	ND	0.90909	ND	ND	0.90909		-0.137505
1575	Q8IUC4	657	RHPN2_HUMAN Rhophilin-2 OS=Homo sapiens OX=9606 GN=RHPN2 PE=1 SV=1	ND	0.90909	ND	ND	0.90909		-0.137505
1576	Q8N4T4	10	ARG39_HUMAN Rho guanine nucleotide exchange factor 39 OS=Homo sapiens OX=9606 GN=ARHGEF39 PE=1 SV=1	ND	ND	0.90909	ND	0.90909		-0.137505
1577	Q8ND82	94	Z280C_HUMAN Zinc finger protein 280C OS=Homo sapiens OX=9606 GN=ZNF280C PE=1 SV=1	ND	ND	0.90909	ND	0.90909		-0.137505
1578	Q8WY36	150	BBX_HUMAN HMG box transcription factor BBX OS=Homo sapiens OX=9606 GN=BBX PE=1 SV=1	ND	0.90909	ND	ND	0.90909		-0.137505
1579	Q9NPI1	338	BRD7_HUMAN Bromodomain-containing protein 7 OS=Homo sapiens OX=9606 GN=BRD7 PE=1 SV=1	ND	ND	0.90909	ND	0.90909		-0.137505
1580	Q9NUU7	392	DD19A_HUMAN ATP-dependent RNA helicase DDX19A OS=Homo sapiens OX=9606 GN=DDX19A PE=1 SV=1	ND	ND	0.90909	ND	0.90909		-0.137505
1581	P15924	1280	DESP_HUMAN Desmoplakin OS=Homo sapiens OX=9606 GN=DSP PE=1 SV=3	ND	0.75473	1.06219	ND	0.90846	0.217407	-0.138505
1582	Q9BZG8	433	DPH1_HUMAN 2-(3-amino-3-carboxypropyl)histidine synthase subunit 1 OS=Homo sapiens OX=9606 GN=DPH1 PE=1 SV=2	ND	0.80645	1.0101	ND	0.908275	0.144002	-0.138799
1583	Q96C36	225	P5CR2_HUMAN Pyrroline-5-carboxylate reductase 2 OS=Homo sapiens OX=9606 GN=PYCR2 PE=1 SV=1	0.8451	1.07846	0.79962	0.90909	0.908068	0.122148	-0.139129
1584	Q13501	131	SQSTM_HUMAN Sequestosome-1 OS=Homo sapiens OX=9606 GN=SQSTM1 PE=1 SV=1	0.89508	1.00944	0.88226	0.84545	0.908057	0.0707861	-0.139144
1585	Q9HB74	7	Q9HB74_HUMAN PNAS-102 OS=Homo sapiens OX=9606 PE=2 SV=1	ND	0.74074	1.07527	ND	0.908005	0.236548	-0.139228
1586	Q96JQ2	353	CLMN_HUMAN Calmin OS=Homo sapiens OX=9606 GN=CLMN PE=1 SV=1	0.84481	0.96352	0.90152	0.92171	0.90789	0.0493469	-0.139411
1587	O15550	797	KDM6A_HUMAN Lysine-specific demethylase 6A OS=Homo sapiens OX=9606 GN=KDM6A PE=1 SV=2	ND	0.95238	0.86207	ND	0.907225	0.0638588	-0.140468
1588	Q9NZB2	1088	F120A_HUMAN Constitutive coactivator of PPAR-gamma-like protein 1 OS=Homo sapiens OX=9606 GN=FAM120A PE=1 SV=2	0.91743	0.90909	ND	0.89286	0.90646	0.0124944	-0.141685
1589	Q02952	470	AKA12_HUMAN A-kinase anchor protein 12 OS=Homo sapiens OX=9606 GN=AKAP12 PE=1 SV=4	0.90909	ND	0.9009	ND	0.904995	0.0057912	-0.144018
1590	P08651	88	NFIC_HUMAN Nuclear factor 1 C-type OS=Homo sapiens OX=9606 GN=NFIC PE=1 SV=2	0.93458	0.87194	0.9434	0.86712	0.90426	0.0403121	-0.14519
1591	Q96PU4	92	UHRF2_HUMAN E3 ubiquitin-protein ligase UHRF2 OS=Homo sapiens OX=9606 GN=UHRF2 PE=1 SV=1	0.87719	0.87719	0.96154	0.9009	0.904205	0.039824	-0.145278
1592	A0MZ66	565	SHOT1_HUMAN Shootin-1 OS=Homo sapiens OX=9606 GN=SHTN1 PE=1 SV=4	0.90909	1.04933	0.84512	0.81301	0.904138	0.10471	-0.145386
1593	P78527	1904	PRKDC_HUMAN DNA-dependent protein kinase catalytic subunit OS=Homo sapiens OX=9606 GN=PRKDC PE=1 SV=3	0.94348	0.9149	0.84034	0.91743	0.904037	0.0443863	-0.145545
1594	Q02878	44	RL6_HUMAN 60S ribosomal protein L6 OS=Homo sapiens OX=9606 GN=RPL6 PE=1 SV=3	0.84608	0.96154	ND	ND	0.90381	0.0816425	-0.145909
1595	Q8N1G0	339	ZN687_HUMAN Zinc finger protein 687 OS=Homo sapiens OX=9606 GN=ZNF687 PE=1 SV=1	ND	0.93458	ND	0.86957	0.902075	0.045969	-0.148681
1596	Q5VYS8	690	TUT7_HUMAN Terminal uridylyltransferase 7 OS=Homo sapiens OX=9606 GN=TUT7 PE=1 SV=1	ND	1.0101	ND	0.79365	0.901875	0.153053	-0.149001
1597	Q15021	596	CND1_HUMAN Condensin complex subunit 1 OS=Homo sapiens OX=9606 GN=NCAPD2 PE=1 SV=3	ND	0.90909	0.89286	ND	0.900975	0.0114763	-0.150441
1598	O75691	1794	UTP20_HUMAN Small subunit processome component 20 homolog OS=Homo sapiens OX=9606 GN=UTP20 PE=1 SV=3	0.9009	ND	ND	ND	0.9009		-0.150561
1599	P12694	197	ODBA_HUMAN 2-oxoisovalerate dehydrogenase subunit alpha, mitochondrial OS=Homo sapiens OX=9606 GN=BCKDHA PE=1 SV=2	ND	ND	0.9009	ND	0.9009		-0.150561
1600	P13807	699	GYS1_HUMAN Glycogen [starch] synthase, muscle OS=Homo sapiens OX=9606 GN=GYS1 PE=1 SV=2	ND	0.9009	ND	ND	0.9009		-0.150561
1601	Q06587	279	RING1_HUMAN E3 ubiquitin-protein ligase RING1 OS=Homo sapiens OX=9606 GN=RING1 PE=1 SV=2	ND	ND	0.9009	ND	0.9009		-0.150561
1602	Q07812	62	BAX_HUMAN Apoptosis regulator BAX OS=Homo sapiens OX=9606 GN=BAX PE=1 SV=1	ND	0.9009	ND	ND	0.9009		-0.150561
1603	Q9BV36	254	MELPH_HUMAN Melanophilin OS=Homo sapiens OX=9606 GN=MLPH PE=1 SV=1	0.9009	ND	ND	ND	0.9009		-0.150561
1604	Q9C0C2	1443	TB182_HUMAN 182 kDa tankyrase-1-binding protein OS=Homo sapiens OX=9606 GN=TNKS1BP1 PE=1 SV=4	0.9009	ND	ND	ND	0.9009		-0.150561
1605	P23921	779	RIR1_HUMAN Ribonucleoside-diphosphate reductase large subunit OS=Homo sapiens OX=9606 GN=RRM1 PE=1 SV=1	0.82656	0.87703	0.92724	0.97147	0.900575	0.0626357	-0.151082
1606	Q99460	898	PSMD1_HUMAN 26S proteasome non-ATPase regulatory subunit 1 OS=Homo sapiens OX=9606 GN=PSMD1 PE=1 SV=2	1.03093	ND	ND	0.76923	0.90008	0.18505	-0.151875
1607	P21333	478	FLNA_HUMAN Filamin-A OS=Homo sapiens OX=9606 GN=FLNA PE=1 SV=4	0.9009	0.92593	0.87338	ND	0.90007	0.0262848	-0.151891
1608	Q9Y6K0	30	CEPT1_HUMAN Choline/ethanolaminephosphotransferase 1 OS=Homo sapiens OX=9606 GN=CEPT1 PE=1 SV=1	ND	0.95238	0.84746	ND	0.89992	0.0741896	-0.152131
1609	Q7Z5J4	1745	RAI1_HUMAN Retinoic acid-induced protein 1 OS=Homo sapiens OX=9606 GN=RAI1 PE=1 SV=2	ND	0.86207	0.93458	ND	0.898325	0.0512723	-0.154691
1610	Q8IVH8	509	M4K3_HUMAN Mitogen-activated protein kinase kinase kinase kinase 3 OS=Homo sapiens OX=9606 GN=MAP4K3 PE=1 SV=1	ND	1.03367	0.81306	0.84746	0.898063	0.118692	-0.155111
1611	Q03111	479	ENL_HUMAN Protein ENL OS=Homo sapiens OX=9606 GN=MLLT1 PE=1 SV=2	ND	0.77519	1.02041	ND	0.8978	0.173397	-0.155534
1612	Q9Y3T9	585	NOC2L_HUMAN Nucleolar complex protein 2 homolog OS=Homo sapiens OX=9606 GN=NOC2L PE=1 SV=4	0.95192	0.90881	0.81982	0.90938	0.897483	0.0555721	-0.156044
1613	Q6UXH9	580	PAMR1_HUMAN Inactive serine protease PAMR1 OS=Homo sapiens OX=9606 GN=PAMR1 PE=1 SV=1	ND	ND	0.84034	0.95331	0.896825	0.0798819	-0.157102
1614	Q5JU85	578	IQEC2_HUMAN IQ motif and SEC7 domain-containing protein 2 OS=Homo sapiens OX=9606 GN=IQSEC2 PE=1 SV=2	ND	0.89286	0.92593	0.86957	0.89612	0.0283211	-0.158236
1615	Q9H2G2	1153	SLK_HUMAN STE20-like serine/threonine-protein kinase OS=Homo sapiens OX=9606 GN=SLK PE=1 SV=1	0.98039	ND	0.9009	0.80645	0.895913	0.0870772	-0.158569
1616	P45880	76	VDAC2_HUMAN Voltage-dependent anion-selective channel protein 2 OS=Homo sapiens OX=9606 GN=VDAC2 PE=1 SV=2	ND	0.83385	0.89478	0.95589	0.89484	0.06102	-0.160298
1617	O75694	1344	NU155_HUMAN Nuclear pore complex protein Nup155 OS=Homo sapiens OX=9606 GN=NUP155 PE=1 SV=1	ND	0.8547	ND	0.93458	0.89464	0.0564837	-0.160621
1618	P23528	139	COF1_HUMAN Cofilin-1 OS=Homo sapiens OX=9606 GN=CFL1 PE=1 SV=3	0.86441	0.89248	0.88552	0.93402	0.894107	0.0291624	-0.16148
1619	P26368	429	U2AF2_HUMAN Splicing factor U2AF 65 kDa subunit OS=Homo sapiens OX=9606 GN=U2AF2 PE=1 SV=4	ND	1	ND	0.7874	0.8937	0.150331	-0.162137
1620	Q92575	186	UBXN4_HUMAN UBX domain-containing protein 4 OS=Homo sapiens OX=9606 GN=UBXN4 PE=1 SV=2	0.96154	0.82645	0.90909	0.87746	0.893635	0.0566433	-0.162242
1621	Q8IX01	970	SUGP2_HUMAN SURP and G-patch domain-containing protein 2 OS=Homo sapiens OX=9606 GN=SUGP2 PE=1 SV=2	ND	0.9009	0.91743	0.86207	0.893467	0.0284187	-0.162514
1622	P05091	319	ALDH2_HUMAN Aldehyde dehydrogenase, mitochondrial OS=Homo sapiens OX=9606 GN=ALDH2 PE=1 SV=2	0.86044	0.83321	0.92636	0.95216	0.893042	0.0555211	-0.163199	Active site	Note=Nucleophile
1623	Q15181	114	IPYR_HUMAN Inorganic pyrophosphatase OS=Homo sapiens OX=9606 GN=PPA1 PE=1 SV=2	0.86207	0.84034	0.9434	0.92593	0.892935	0.0495118	-0.163373
1624	P43243	230	MATR3_HUMAN Matrin-3 OS=Homo sapiens OX=9606 GN=MATR3 PE=1 SV=2	ND	0.88496	ND	0.9009	0.89293	0.0112713	-0.163381
1625	O94885	1120	SASH1_HUMAN SAM and SH3 domain-containing protein 1 OS=Homo sapiens OX=9606 GN=SASH1 PE=1 SV=3	ND	ND	0.89286	ND	0.89286		-0.163494
1626	O96028	406	NSD2_HUMAN Histone-lysine N-methyltransferase NSD2 OS=Homo sapiens OX=9606 GN=NSD2 PE=1 SV=1	ND	ND	ND	0.89286	0.89286		-0.163494
1627	Q9BVG8	168	KIFC3_HUMAN Kinesin-like protein KIFC3 OS=Homo sapiens OX=9606 GN=KIFC3 PE=1 SV=4	ND	0.89286	ND	ND	0.89286		-0.163494
1628	O95573	652	ACSL3_HUMAN Long-chain-fatty-acid--CoA ligase 3 OS=Homo sapiens OX=9606 GN=ACSL3 PE=1 SV=3	0.7874	ND	1	0.88866	0.89202	0.10634	-0.164852
1629	Q9NX70	126	MED29_HUMAN Mediator of RNA polymerase II transcription subunit 29 OS=Homo sapiens OX=9606 GN=MED29 PE=1 SV=1	ND	1.00492	0.70922	0.96154	0.891893	0.15968	-0.165057
1630	Q8IYB7	196	DI3L2_HUMAN DIS3-like exonuclease 2 OS=Homo sapiens OX=9606 GN=DIS3L2 PE=1 SV=4	ND	0.9434	0.84034	ND	0.89187	0.0728744	-0.165095
1631	O96008	76	TOM40_HUMAN Mitochondrial import receptor subunit TOM40 homolog OS=Homo sapiens OX=9606 GN=TOMM40 PE=1 SV=1	0.83333	0.83403	0.90909	0.9901	0.891637	0.0746499	-0.165471
1632	Q15154	582	PCM1_HUMAN Pericentriolar material 1 protein OS=Homo sapiens OX=9606 GN=PCM1 PE=1 SV=5	0.86207	0.9009	0.9246	0.87768	0.891312	0.027331	-0.165997
1633	P53384	25	NUBP1_HUMAN Cytosolic Fe-S cluster assembly factor NUBP1 OS=Homo sapiens OX=9606 GN=NUBP1 PE=1 SV=2	0.85784	0.90678	0.96313	0.83597	0.89093	0.0565084	-0.166616	Metal binding	Note=Iron-sulfur 1 (4Fe-4S);Ontology_term=ECO:0000255;evidence=ECO:0000255|HAMAP-Rule:MF_03038
1634	P35914	323	HMGCL_HUMAN Hydroxymethylglutaryl-CoA lyase, mitochondrial OS=Homo sapiens OX=9606 GN=HMGCL PE=1 SV=2	0.89286	ND	0.86491	0.9147	0.890823	0.0249574	-0.166789	Disulfide bond&Mutagenesis	Note=Interchain;Ontology_term=ECO:0000269;evidence=ECO:0000269|PubMed:12464283;Dbxref=PMID:12464283$Note=Abolishes interchain homodimerization. Exhibits no DTT stimulated activity. C->S;Ontology_term=ECO:0000269,ECO:0000269;evidence=ECO:0000269|PubMed:12464283,ECO:0000269|PubMed:22865860;Dbxref=PMID:12464283,PMID:22865860
1635	P11413	13	G6PD_HUMAN Glucose-6-phosphate 1-dehydrogenase OS=Homo sapiens OX=9606 GN=G6PD PE=1 SV=4	0.9734	ND	0.8082	ND	0.8908	0.116814	-0.166827
1636	Q9Y3E2	126	BOLA1_HUMAN BolA-like protein 1 OS=Homo sapiens OX=9606 GN=BOLA1 PE=1 SV=1	ND	0.8547	0.92593	ND	0.890315	0.0503672	-0.167612
1637	Q99871	132	HAUS7_HUMAN HAUS augmin-like complex subunit 7 OS=Homo sapiens OX=9606 GN=HAUS7 PE=1 SV=3	0.70423	1.09264	0.96763	0.79365	0.889537	0.174052	-0.168873
1638	Q5GLZ8	175	HERC4_HUMAN Probable E3 ubiquitin-protein ligase HERC4 OS=Homo sapiens OX=9606 GN=HERC4 PE=1 SV=1	ND	0.95238	ND	0.82645	0.889415	0.089046	-0.169071
1639	Q9UBW7	823	ZMYM2_HUMAN Zinc finger MYM-type protein 2 OS=Homo sapiens OX=9606 GN=ZMYM2 PE=1 SV=1	ND	ND	0.86957	0.90909	0.88933	0.0279449	-0.169209
1640	Q9P2E3	872	ZNFX1_HUMAN NFX1-type zinc finger-containing protein 1 OS=Homo sapiens OX=9606 GN=ZNFX1 PE=2 SV=2	ND	0.87719	ND	0.9009	0.889045	0.0167655	-0.169672
1641	Q96KR6	77	F210B_HUMAN Protein FAM210B, mitochondrial OS=Homo sapiens OX=9606 GN=FAM210B PE=1 SV=2	1.03957	ND	0.86957	0.75797	0.889037	0.141806	-0.169685
1642	Q9Y3F4	305	STRAP_HUMAN Serine-threonine kinase receptor-associated protein OS=Homo sapiens OX=9606 GN=STRAP PE=1 SV=1	0.8547	0.83695	0.86207	1.00149	0.888803	0.0758612	-0.170065
1643	E7EUI8	13	E7EUI8_HUMAN Glucose-6-phosphate 1-dehydrogenase (Fragment) OS=Homo sapiens OX=9606 GN=G6PD PE=1 SV=8	ND	0.8888	ND	ND	0.8888		-0.170069
1644	O60502	596	OGA_HUMAN Protein O-GlcNAcase OS=Homo sapiens OX=9606 GN=MGEA5 PE=1 SV=2	0.97623	0.82306	0.78125	0.97439	0.888733	0.101421	-0.170179
1645	A0A1B0GW03	52	A0A1B0GW03_HUMAN Pleckstrin homology domain-containing family A member 6 (Fragment) OS=Homo sapiens OX=9606 GN=PLEKHA6 PE=1 SV=2	0.73529	ND	1.04167	ND	0.88848	0.216643	-0.170589
1646	P47895	52	AL1A3_HUMAN Aldehyde dehydrogenase family 1 member A3 OS=Homo sapiens OX=9606 GN=ALDH1A3 PE=1 SV=2	0.67568	1.03093	0.95238	0.89286	0.887962	0.1524	-0.171429
1647	Q96F63	78	CCD97_HUMAN Coiled-coil domain-containing protein 97 OS=Homo sapiens OX=9606 GN=CCDC97 PE=1 SV=1	0.88274	0.82645	0.9434	0.89286	0.886362	0.0479518	-0.174031
1648	Q96JM3	194	CHAP1_HUMAN Chromosome alignment-maintaining phosphoprotein 1 OS=Homo sapiens OX=9606 GN=CHAMP1 PE=1 SV=2	0.84034	ND	0.90909	0.90909	0.886173	0.0396928	-0.174339
1649	Q5T5Y3	719	CAMP1_HUMAN Calmodulin-regulated spectrin-associated protein 1 OS=Homo sapiens OX=9606 GN=CAMSAP1 PE=1 SV=2	ND	0.9009	0.9009	0.8547	0.8855	0.0266736	-0.175436
1650	Q7Z2T5	320	TRM1L_HUMAN TRMT1-like protein OS=Homo sapiens OX=9606 GN=TRMT1L PE=1 SV=2	ND	0.8	0.97057	ND	0.885285	0.120611	-0.175786
1651	P49321	708	NASP_HUMAN Nuclear autoantigenic sperm protein OS=Homo sapiens OX=9606 GN=NASP PE=1 SV=2	0.97087	0.88496	0.79365	0.89102	0.885125	0.0724676	-0.176047
1652	Q12802	934	AKP13_HUMAN A-kinase anchor protein 13 OS=Homo sapiens OX=9606 GN=AKAP13 PE=1 SV=2	0.83333	0.95238	0.86957	ND	0.885093	0.0610242	-0.176098
1653	D6RD77	27	D6RD77_HUMAN OCIA domain-containing protein 2 OS=Homo sapiens OX=9606 GN=OCIAD2 PE=1 SV=1	0.79931	0.9967	0.85716	0.88674	0.884977	0.0828608	-0.176287
1654	O00291	613	HIP1_HUMAN Huntingtin-interacting protein 1 OS=Homo sapiens OX=9606 GN=HIP1 PE=1 SV=5	ND	ND	0.88496	ND	0.88496		-0.176316
1655	O43837	185	IDH3B_HUMAN Isocitrate dehydrogenase [NAD] subunit beta, mitochondrial OS=Homo sapiens OX=9606 GN=IDH3B PE=1 SV=2	ND	ND	ND	0.88496	0.88496		-0.176316
1656	P19174	12	PLCG1_HUMAN 1-phosphatidylinositol 4,5-bisphosphate phosphodiesterase gamma-1 OS=Homo sapiens OX=9606 GN=PLCG1 PE=1 SV=1	ND	0.88496	ND	ND	0.88496		-0.176316
1657	P21333	1723	FLNA_HUMAN Filamin-A OS=Homo sapiens OX=9606 GN=FLNA PE=1 SV=4	ND	0.88496	ND	ND	0.88496		-0.176316
1658	P27987	226	IP3KB_HUMAN Inositol-trisphosphate 3-kinase B OS=Homo sapiens OX=9606 GN=ITPKB PE=1 SV=5	ND	ND	0.88496	ND	0.88496		-0.176316
1659	P48634	437	PRC2A_HUMAN Protein PRRC2A OS=Homo sapiens OX=9606 GN=PRRC2A PE=1 SV=3	ND	0.88496	0.88496	ND	0.88496	0	-0.176316
1660	P98170	12	XIAP_HUMAN E3 ubiquitin-protein ligase XIAP OS=Homo sapiens OX=9606 GN=XIAP PE=1 SV=2	ND	ND	0.88496	ND	0.88496		-0.176316
1661	Q8IZW8	409	TENS4_HUMAN Tensin-4 OS=Homo sapiens OX=9606 GN=TNS4 PE=1 SV=3	ND	0.88496	ND	ND	0.88496		-0.176316
1662	Q8WUD1	154	RAB2B_HUMAN Ras-related protein Rab-2B OS=Homo sapiens OX=9606 GN=RAB2B PE=1 SV=1	ND	0.88496	ND	ND	0.88496		-0.176316
1663	Q96IF1	224	AJUBA_HUMAN LIM domain-containing protein ajuba OS=Homo sapiens OX=9606 GN=AJUBA PE=1 SV=1	ND	ND	0.88496	ND	0.88496		-0.176316
1664	P55884	384	EIF3B_HUMAN Eukaryotic translation initiation factor 3 subunit B OS=Homo sapiens OX=9606 GN=EIF3B PE=1 SV=3	ND	0.81301	ND	0.95639	0.8847	0.101385	-0.17674
1665	Q96MH2	80	HEXI2_HUMAN Protein HEXIM2 OS=Homo sapiens OX=9606 GN=HEXIM2 PE=1 SV=1	ND	0.95025	0.93458	0.76923	0.884687	0.100295	-0.176762
1666	Q96SK2	301	TM209_HUMAN Transmembrane protein 209 OS=Homo sapiens OX=9606 GN=TMEM209 PE=1 SV=2	0.84746	0.87719	0.87042	0.9434	0.884617	0.0412019	-0.176874
1667	P46821	2083	MAP1B_HUMAN Microtubule-associated protein 1B OS=Homo sapiens OX=9606 GN=MAP1B PE=1 SV=2	ND	0.88427	ND	ND	0.88427		-0.177441
1668	P41240	31	CSK_HUMAN Tyrosine-protein kinase CSK OS=Homo sapiens OX=9606 GN=CSK PE=1 SV=1	0.83333	ND	0.93458	ND	0.883955	0.0715946	-0.177955
1669	Q92696	342	PGTA_HUMAN Geranylgeranyl transferase type-2 subunit alpha OS=Homo sapiens OX=9606 GN=RABGGTA PE=1 SV=2	ND	0.82645	1.0101	0.81301	0.883187	0.110115	-0.17921
1670	P04183	206	KITH_HUMAN Thymidine kinase, cytosolic OS=Homo sapiens OX=9606 GN=TK1 PE=1 SV=2	0.84746	0.83058	0.93608	0.91743	0.882887	0.0516843	-0.179698
1671	Q9UJX3	131	APC7_HUMAN Anaphase-promoting complex subunit 7 OS=Homo sapiens OX=9606 GN=ANAPC7 PE=1 SV=4	0.95238	ND	0.81301	ND	0.882695	0.0985495	-0.180013
1672	P04406	152	G3P_HUMAN Glyceraldehyde-3-phosphate dehydrogenase OS=Homo sapiens OX=9606 GN=GAPDH PE=1 SV=3	0.85633	1.02716	0.84077	0.80489	0.882288	0.0989544	-0.180679	Active site&Modified residue&Modified residue&Modified residue&Modified residue&Mutagenesis	Note=Nucleophile$Note=ADP-ribosylcysteine%3B by autocatalysis%3B in irreversibly inhibited form;Ontology_term=ECO:0000250;evidence=ECO:0000250$Note=Cysteine persulfide;Ontology_term=ECO:0000250;evidence=ECO:0000250$Note=S-(2-succinyl)cysteine;Ontology_term=ECO:0000250;evidence=ECO:0000250|UniProtKB:P04797$Note=S-nitrosocysteine%3B in reversibly inhibited form;Ontology_term=ECO:0000250;evidence=EC…
1673	O94992	18	HEXI1_HUMAN Protein HEXIM1 OS=Homo sapiens OX=9606 GN=HEXIM1 PE=1 SV=1	0.81301	0.95247	0.87719	0.88496	0.881908	0.0570307	-0.181301
1674	Q8NC96	162	NECP1_HUMAN Adaptin ear-binding coat-associated protein 1 OS=Homo sapiens OX=9606 GN=NECAP1 PE=1 SV=2	ND	ND	0.98039	0.78339	0.88189	0.1393	-0.181329
1675	Q14693	573	LPIN1_HUMAN Phosphatidate phosphatase LPIN1 OS=Homo sapiens OX=9606 GN=LPIN1 PE=1 SV=2	0.93458	0.72464	1.16359	0.70423	0.88176	0.214804	-0.181542
1676	Q6PJG6	513	BRAT1_HUMAN BRCA1-associated ATM activator 1 OS=Homo sapiens OX=9606 GN=BRAT1 PE=1 SV=2	ND	0.89286	0.84034	0.90909	0.880763	0.0359359	-0.183174
1677	P48200	174	IREB2_HUMAN Iron-responsive element-binding protein 2 OS=Homo sapiens OX=9606 GN=IREB2 PE=1 SV=3	0.905	ND	0.81967	0.91743	0.8807	0.0532177	-0.183277
1678	Q96JQ2	445	CLMN_HUMAN Calmin OS=Homo sapiens OX=9606 GN=CLMN PE=1 SV=1	ND	0.625	1.13636	ND	0.88068	0.361586	-0.18331
1679	Q14247	246	SRC8_HUMAN Src substrate cortactin OS=Homo sapiens OX=9606 GN=CTTN PE=1 SV=2	0.89743	0.79365	0.90133	0.92974	0.880537	0.0596881	-0.183544
1680	Q8NEU8	412	DP13B_HUMAN DCC-interacting protein 13-beta OS=Homo sapiens OX=9606 GN=APPL2 PE=1 SV=3	ND	0.87966	ND	ND	0.87966		-0.184982
1681	P16615	997	AT2A2_HUMAN Sarcoplasmic/endoplasmic reticulum calcium ATPase 2 OS=Homo sapiens OX=9606 GN=ATP2A2 PE=1 SV=1	0.83333	0.94781	0.83559	0.8987	0.878858	0.0550545	-0.186299
1682	Q68DK7	221	MSL1_HUMAN Male-specific lethal 1 homolog OS=Homo sapiens OX=9606 GN=MSL1 PE=1 SV=3	ND	0.87194	0.88496	ND	0.87845	0.00920653	-0.186968
1683	Q15185	58	TEBP_HUMAN Prostaglandin E synthase 3 OS=Homo sapiens OX=9606 GN=PTGES3 PE=1 SV=1	0.83333	0.90653	0.87288	0.90036	0.878275	0.0333429	-0.187255
1684	Q9NWM0	122	SMOX_HUMAN Spermine oxidase OS=Homo sapiens OX=9606 GN=SMOX PE=1 SV=1	ND	0.86207	ND	0.89286	0.877465	0.0217718	-0.188587
1685	P46013	2464	KI67_HUMAN Proliferation marker protein Ki-67 OS=Homo sapiens OX=9606 GN=MKI67 PE=1 SV=2	ND	0.93458	ND	0.82024	0.87741	0.0808506	-0.188677
1686	O00429	505	DNM1L_HUMAN Dynamin-1-like protein OS=Homo sapiens OX=9606 GN=DNM1L PE=1 SV=2	ND	ND	0.87719	ND	0.87719		-0.189039	Mutagenesis	Note=No effect on S-nitrosylation. C->A;Ontology_term=ECO:0000269;evidence=ECO:0000269|PubMed:19342591;Dbxref=PMID:19342591
1687	O15067	270	PUR4_HUMAN Phosphoribosylformylglycinamidine synthase OS=Homo sapiens OX=9606 GN=PFAS PE=1 SV=4	0.87719	ND	ND	ND	0.87719		-0.189039
1688	P17655	82	CAN2_HUMAN Calpain-2 catalytic subunit OS=Homo sapiens OX=9606 GN=CAPN2 PE=1 SV=6	0.87719	ND	ND	ND	0.87719		-0.189039
1689	Q14669	332	TRIPC_HUMAN E3 ubiquitin-protein ligase TRIP12 OS=Homo sapiens OX=9606 GN=TRIP12 PE=1 SV=1	ND	ND	ND	0.87719	0.87719		-0.189039
1690	Q6PJ69	112	TRI65_HUMAN Tripartite motif-containing protein 65 OS=Homo sapiens OX=9606 GN=TRIM65 PE=1 SV=3	ND	0.87719	0.87719	ND	0.87719	0	-0.189039
1691	Q75QN2	491	INT8_HUMAN Integrator complex subunit 8 OS=Homo sapiens OX=9606 GN=INTS8 PE=1 SV=1	0.87719	ND	ND	ND	0.87719		-0.189039
1692	Q8WWY3	247	PRP31_HUMAN U4/U6 small nuclear ribonucleoprotein Prp31 OS=Homo sapiens OX=9606 GN=PRPF31 PE=1 SV=2	ND	0.87719	ND	ND	0.87719		-0.189039	Site	Note=Interaction with U4 snRNA;Ontology_term=ECO:0000269;evidence=ECO:0000269|PubMed:17412961;Dbxref=PMID:17412961
1693	Q8WYP5	1628	ELYS_HUMAN Protein ELYS OS=Homo sapiens OX=9606 GN=AHCTF1 PE=1 SV=3	ND	ND	0.87719	ND	0.87719		-0.189039
1694	Q92966	11	SNPC3_HUMAN snRNA-activating protein complex subunit 3 OS=Homo sapiens OX=9606 GN=SNAPC3 PE=1 SV=1	0.87719	ND	ND	ND	0.87719		-0.189039
1695	Q96S59	610	RANB9_HUMAN Ran-binding protein 9 OS=Homo sapiens OX=9606 GN=RANBP9 PE=1 SV=1	ND	ND	0.87719	ND	0.87719		-0.189039
1696	Q9UIF9	795	BAZ2A_HUMAN Bromodomain adjacent to zinc finger domain protein 2A OS=Homo sapiens OX=9606 GN=BAZ2A PE=1 SV=4	ND	ND	0.87719	ND	0.87719		-0.189039
1697	P07814	744	SYEP_HUMAN Bifunctional glutamate/proline--tRNA ligase OS=Homo sapiens OX=9606 GN=EPRS PE=1 SV=5	0.88496	0.85664	0.91676	0.84746	0.876455	0.0312526	-0.190248
1698	B9W0P3	38	B9W0P3_HUMAN Ataxin 3 (Fragment) OS=Homo sapiens OX=9606 GN=ATXN3 PE=4 SV=1	ND	0.87487	0.89173	0.86207	0.876223	0.0148762	-0.190629
1699	P78527	1499	PRKDC_HUMAN DNA-dependent protein kinase catalytic subunit OS=Homo sapiens OX=9606 GN=PRKDC PE=1 SV=3	0.9434	0.95238	0.81967	0.7874	0.875713	0.0844578	-0.191471
1700	P21333	2543	FLNA_HUMAN Filamin-A OS=Homo sapiens OX=9606 GN=FLNA PE=1 SV=4	0.86842	0.86628	0.87627	0.89179	0.87569	0.0115607	-0.191508
1701	Q96EI5	34	TCAL4_HUMAN Transcription elongation factor A protein-like 4 OS=Homo sapiens OX=9606 GN=TCEAL4 PE=1 SV=2	0.86621	0.88855	0.87726	0.86963	0.875413	0.00990169	-0.191965
1702	O94763	44	RMP_HUMAN Unconventional prefoldin RPB5 interactor 1 OS=Homo sapiens OX=9606 GN=URI1 PE=1 SV=3	ND	0.84034	ND	0.90909	0.874715	0.0486136	-0.193115
1703	Q15796	70	SMAD2_HUMAN Mothers against decapentaplegic homolog 2 OS=Homo sapiens OX=9606 GN=SMAD2 PE=1 SV=1	ND	0.84746	0.94612	0.83049	0.87469	0.0624394	-0.193156
1704	O00273	38	DFFA_HUMAN DNA fragmentation factor subunit alpha OS=Homo sapiens OX=9606 GN=DFFA PE=1 SV=1	ND	0.63291	1.16279	0.82645	0.87405	0.268128	-0.194212
1705	P54278	653	PMS2_HUMAN Mismatch repair endonuclease PMS2 OS=Homo sapiens OX=9606 GN=PMS2 PE=1 SV=2	1.03093	0.75758	0.83333	ND	0.873947	0.141129	-0.194383
1706	P53816	113	PA216_HUMAN HRAS-like suppressor 3 OS=Homo sapiens OX=9606 GN=PLA2G16 PE=1 SV=2	ND	ND	0.89286	0.8547	0.87378	0.0269832	-0.194658	Active site&Mutagenesis	Note=Acyl-thioester intermediate;Ontology_term=ECO:0000269,ECO:0000269,ECO:0000269;evidence=ECO:0000269|PubMed:20837014,ECO:0000269|PubMed:22605381,ECO:0000269|PubMed:22923616;Dbxref=PMID:20837014,PMID:22605381,PMID:22923616$Note=No effect on PPP2R1A-binding. Impaired ability to act as a host factor for picornaviruses. C->S;Ontology_term=ECO:0000269,ECO:0000269;evidence=ECO:0000269|PubMed:1737464…
1707	O94851	703	MICA2_HUMAN [F-actin]-monooxygenase MICAL2 OS=Homo sapiens OX=9606 GN=MICAL2 PE=1 SV=1	ND	0.86957	ND	0.87719	0.87338	0.00538815	-0.195319
1708	Q5UIP0	1619	RIF1_HUMAN Telomere-associated protein RIF1 OS=Homo sapiens OX=9606 GN=RIF1 PE=1 SV=2	0.96154	ND	0.74028	0.91743	0.873083	0.117107	-0.195809
1709	P15924	2776	DESP_HUMAN Desmoplakin OS=Homo sapiens OX=9606 GN=DSP PE=1 SV=3	ND	0.89286	0.83333	0.89286	0.873017	0.0343697	-0.195919
1710	Q6PUV4	90	CPLX2_HUMAN Complexin-2 OS=Homo sapiens OX=9606 GN=CPLX2 PE=2 SV=2	0.82839	0.86024	0.88349	0.91793	0.872513	0.0377742	-0.196752
1711	Q6L8Q7	108	PDE12_HUMAN 2',5'-phosphodiesterase 12 OS=Homo sapiens OX=9606 GN=PDE12 PE=1 SV=2	0.9104	0.83719	0.86957	ND	0.872387	0.0366862	-0.19696
1712	Q9Y6K1	340	DNM3A_HUMAN DNA (cytosine-5)-methyltransferase 3A OS=Homo sapiens OX=9606 GN=DNMT3A PE=1 SV=4	ND	0.83333	ND	0.90909	0.87121	0.0535704	-0.198908
1713	P27708	758	PYR1_HUMAN CAD protein OS=Homo sapiens OX=9606 GN=CAD PE=1 SV=3	0.75758	1.02124	0.68027	1.02564	0.871183	0.178631	-0.198953
1714	O43719	480	HTSF1_HUMAN HIV Tat-specific factor 1 OS=Homo sapiens OX=9606 GN=HTATSF1 PE=1 SV=1	0.82645	ND	0.66225	1.12353	0.870743	0.233808	-0.199681
1715	Q9Y3B4	83	SF3B6_HUMAN Splicing factor 3B subunit 6 OS=Homo sapiens OX=9606 GN=SF3B6 PE=1 SV=1	0.9009	0.84034	ND	ND	0.87062	0.0428224	-0.199885
1716	Q9C0K1	291	S39A8_HUMAN Zinc transporter ZIP8 OS=Homo sapiens OX=9606 GN=SLC39A8 PE=2 SV=1	ND	ND	1.14943	0.59172	0.870575	0.394361	-0.19996
1717	A0A0A0MTP6	860	A0A0A0MTP6_HUMAN Phosphatidylinositol 3,4,5-trisphosphate 5-phosphatase 2 OS=Homo sapiens OX=9606 GN=INPPL1 PE=1 SV=1	0.86957	ND	ND	ND	0.86957		-0.201626
1718	O75794	212	CD123_HUMAN Cell division cycle protein 123 homolog OS=Homo sapiens OX=9606 GN=CDC123 PE=1 SV=1	ND	ND	0.86957	ND	0.86957		-0.201626
1719	Q15032	858	R3HD1_HUMAN R3H domain-containing protein 1 OS=Homo sapiens OX=9606 GN=R3HDM1 PE=1 SV=3	ND	ND	0.86957	ND	0.86957		-0.201626
1720	Q16658	397	FSCN1_HUMAN Fascin OS=Homo sapiens OX=9606 GN=FSCN1 PE=1 SV=3	ND	0.86957	ND	ND	0.86957		-0.201626
1721	Q6PD74	61	AAGAB_HUMAN Alpha- and gamma-adaptin-binding protein p34 OS=Homo sapiens OX=9606 GN=AAGAB PE=1 SV=1	ND	0.86957	ND	ND	0.86957		-0.201626
1722	Q76FK4	556	NOL8_HUMAN Nucleolar protein 8 OS=Homo sapiens OX=9606 GN=NOL8 PE=1 SV=1	ND	ND	0.86957	ND	0.86957		-0.201626
1723	Q8WTW3	318	COG1_HUMAN Conserved oligomeric Golgi complex subunit 1 OS=Homo sapiens OX=9606 GN=COG1 PE=1 SV=1	ND	0.86957	ND	ND	0.86957		-0.201626
1724	Q92576	1709	PHF3_HUMAN PHD finger protein 3 OS=Homo sapiens OX=9606 GN=PHF3 PE=1 SV=3	ND	ND	0.86957	ND	0.86957		-0.201626
1725	Q96G46	296	DUS3L_HUMAN tRNA-dihydrouridine(47) synthase [NAD(P)(+)]-like OS=Homo sapiens OX=9606 GN=DUS3L PE=1 SV=2	ND	0.86957	ND	ND	0.86957		-0.201626
1726	Q9UQ35	1509	SRRM2_HUMAN Serine/arginine repetitive matrix protein 2 OS=Homo sapiens OX=9606 GN=SRRM2 PE=1 SV=2	ND	ND	0.86957	ND	0.86957		-0.201626
1727	Q8N1F7	522	NUP93_HUMAN Nuclear pore complex protein Nup93 OS=Homo sapiens OX=9606 GN=NUP93 PE=1 SV=2	0.8572	0.85489	0.92879	0.83207	0.868237	0.0419312	-0.203838
1728	P53384	22	NUBP1_HUMAN Cytosolic Fe-S cluster assembly factor NUBP1 OS=Homo sapiens OX=9606 GN=NUBP1 PE=1 SV=2	0.75758	0.85146	0.90119	0.96154	0.867942	0.0862505	-0.204329	Metal binding	Note=Iron-sulfur 1 (4Fe-4S);Ontology_term=ECO:0000255;evidence=ECO:0000255|HAMAP-Rule:MF_03038
1729	Q9UPT9	171	UBP22_HUMAN Ubiquitin carboxyl-terminal hydrolase 22 OS=Homo sapiens OX=9606 GN=USP22 PE=1 SV=2	0.97087	ND	0.74627	0.88496	0.867367	0.113329	-0.205286
1730	P42858	1441	HD_HUMAN Huntingtin OS=Homo sapiens OX=9606 GN=HTT PE=1 SV=2	0.9901	0.80645	0.77549	0.89688	0.86723	0.0967585	-0.205513
1731	O60942	419	MCE1_HUMAN mRNA-capping enzyme OS=Homo sapiens OX=9606 GN=RNGTT PE=1 SV=1	0.81967	0.88993	ND	0.89046	0.866687	0.0407185	-0.206418
1732	P50238	52	CRIP1_HUMAN Cysteine-rich protein 1 OS=Homo sapiens OX=9606 GN=CRIP1 PE=1 SV=3	ND	0.92593	0.80645	ND	0.86619	0.0844851	-0.207245
1733	P05455	245	LA_HUMAN Lupus La protein OS=Homo sapiens OX=9606 GN=SSB PE=1 SV=2	1.03093	0.6993	ND	ND	0.865115	0.234498	-0.209036
1734	Q9NZB2	919	F120A_HUMAN Constitutive coactivator of PPAR-gamma-like protein 1 OS=Homo sapiens OX=9606 GN=FAM120A PE=1 SV=2	0.9167	0.81301	0.91743	0.81301	0.865037	0.0600769	-0.209165
1735	Q6UB35	302	C1TM_HUMAN Monofunctional C1-tetrahydrofolate synthase, mitochondrial OS=Homo sapiens OX=9606 GN=MTHFD1L PE=1 SV=1	0.91742	0.83856	0.83695	0.86707	0.865	0.0375855	-0.209228
1736	Q6KB66	244	K2C80_HUMAN Keratin, type II cytoskeletal 80 OS=Homo sapiens OX=9606 GN=KRT80 PE=1 SV=2	0.93458	0.83262	0.80645	0.88496	0.864652	0.0569089	-0.209808
1737	Q6NXT1	230	ANR54_HUMAN Ankyrin repeat domain-containing protein 54 OS=Homo sapiens OX=9606 GN=ANKRD54 PE=1 SV=2	ND	1.26582	ND	0.46296	0.86439	0.567708	-0.210246
1738	Q06210	254	GFPT1_HUMAN Glutamine--fructose-6-phosphate aminotransferase [isomerizing] 1 OS=Homo sapiens OX=9606 GN=GFPT1 PE=1 SV=3	0.9187	0.92371	0.74627	0.86755	0.864058	0.0825234	-0.210801
1739	O60870	43	KIN17_HUMAN DNA/RNA-binding protein KIN17 OS=Homo sapiens OX=9606 GN=KIN PE=1 SV=2	ND	0.80185	0.9249	ND	0.863375	0.0870095	-0.211941
1740	Q9NX02	143	NALP2_HUMAN NACHT, LRR and PYD domains-containing protein 2 OS=Homo sapiens OX=9606 GN=NLRP2 PE=1 SV=1	0.9261	0.69444	0.9677	ND	0.862747	0.147234	-0.212991
1741	P02545	588	LMNA_HUMAN Prelamin-A/C OS=Homo sapiens OX=9606 GN=LMNA PE=1 SV=1	ND	0.7874	0.9434	0.85695	0.862583	0.0781524	-0.213264
1742	E9PQB7	122	E9PQB7_HUMAN Cofilin-1 (Fragment) OS=Homo sapiens OX=9606 GN=CFL1 PE=1 SV=1	ND	0.84746	0.87719	ND	0.862325	0.0210223	-0.213696
1743	Q6PCE3	125	PGM2L_HUMAN Glucose 1,6-bisphosphate synthase OS=Homo sapiens OX=9606 GN=PGM2L1 PE=1 SV=3	ND	0.59524	0.8547	1.13636	0.8621	0.270636	-0.214073
1744	O60927	60	PP1RB_HUMAN E3 ubiquitin-protein ligase PPP1R11 OS=Homo sapiens OX=9606 GN=PPP1R11 PE=1 SV=1	ND	0.86207	ND	ND	0.86207		-0.214123	Mutagenesis	Note=Loss of function in inducing TLR2 degradation. CCC->SSS;Ontology_term=ECO:0000269;evidence=ECO:0000269|PubMed:27805901;Dbxref=PMID:27805901
1745	Q6ZQU7	103	Q6ZQU7_HUMAN cDNA FLJ46879 fis, clone UTERU3015011, highly similar to Paxillin OS=Homo sapiens OX=9606 PE=2 SV=1	ND	0.86207	ND	ND	0.86207		-0.214123
1746	Q9H2U2	44	IPYR2_HUMAN Inorganic pyrophosphatase 2, mitochondrial OS=Homo sapiens OX=9606 GN=PPA2 PE=1 SV=2	ND	ND	0.86207	0.86207	0.86207	0	-0.214123
1747	Q9NZJ6	186	COQ3_HUMAN Ubiquinone biosynthesis O-methyltransferase, mitochondrial OS=Homo sapiens OX=9606 GN=COQ3 PE=1 SV=3	ND	ND	0.86207	ND	0.86207		-0.214123
1748	Q12802	732	AKP13_HUMAN A-kinase anchor protein 13 OS=Homo sapiens OX=9606 GN=AKAP13 PE=1 SV=2	ND	0.8547	0.86582	ND	0.86026	0.00786303	-0.217155
1749	Q9P2J5	554	SYLC_HUMAN Leucine--tRNA ligase, cytoplasmic OS=Homo sapiens OX=9606 GN=LARS PE=1 SV=2	0.77605	1.01103	0.74026	0.91214	0.85987	0.125052	-0.21781
1750	Q15154	1585	PCM1_HUMAN Pericentriolar material 1 protein OS=Homo sapiens OX=9606 GN=PCM1 PE=1 SV=5	0.79365	ND	0.92593	ND	0.85979	0.0935361	-0.217944
1751	Q01831	60	XPC_HUMAN DNA repair protein complementing XP-C cells OS=Homo sapiens OX=9606 GN=XPC PE=1 SV=4	ND	0.92437	ND	0.79365	0.85901	0.092433	-0.219253
1752	Q07912	843	ACK1_HUMAN Activated CDC42 kinase 1 OS=Homo sapiens OX=9606 GN=TNK2 PE=1 SV=3	ND	0.8	0.91743	ND	0.858715	0.0830355	-0.219749
1753	Q9NRX1	64	PNO1_HUMAN RNA-binding protein PNO1 OS=Homo sapiens OX=9606 GN=PNO1 PE=1 SV=1	0.78125	0.93458	ND	ND	0.857915	0.108421	-0.221093
1754	P61978	184	HNRPK_HUMAN Heterogeneous nuclear ribonucleoprotein K OS=Homo sapiens OX=9606 GN=HNRNPK PE=1 SV=1	0.88496	0.86957	0.83333	0.84034	0.85705	0.0243419	-0.222549
1755	Q9C0C2	1373	TB182_HUMAN 182 kDa tankyrase-1-binding protein OS=Homo sapiens OX=9606 GN=TNKS1BP1 PE=1 SV=4	0.83	0.93719	0.82667	0.83333	0.856797	0.0536639	-0.222974
1756	Q14192	10	FHL2_HUMAN Four and a half LIM domains protein 2 OS=Homo sapiens OX=9606 GN=FHL2 PE=1 SV=3	ND	0.91743	0.75188	0.9009	0.856737	0.0911839	-0.223076
1757	O00469	494	PLOD2_HUMAN Procollagen-lysine,2-oxoglutarate 5-dioxygenase 2 OS=Homo sapiens OX=9606 GN=PLOD2 PE=1 SV=2	0.85184	0.90102	0.82833	0.84455	0.856435	0.0313054	-0.223584
1758	Q96EB6	574	SIR1_HUMAN NAD-dependent protein deacetylase sirtuin-1 OS=Homo sapiens OX=9606 GN=SIRT1 PE=1 SV=2	ND	ND	0.97087	0.74074	0.855805	0.162726	-0.224646
1759	O60645	161	EXOC3_HUMAN Exocyst complex component 3 OS=Homo sapiens OX=9606 GN=EXOC3 PE=1 SV=2	ND	0.8547	ND	ND	0.8547		-0.22651
1760	O75113	454	N4BP1_HUMAN NEDD4-binding protein 1 OS=Homo sapiens OX=9606 GN=N4BP1 PE=1 SV=4	ND	0.8547	ND	ND	0.8547		-0.22651
1761	P14618	423	KPYM_HUMAN Pyruvate kinase PKM OS=Homo sapiens OX=9606 GN=PKM PE=1 SV=4	ND	ND	ND	0.8547	0.8547		-0.22651
1762	P28715	12	ERCC5_HUMAN DNA repair protein complementing XP-G cells OS=Homo sapiens OX=9606 GN=ERCC5 PE=1 SV=3	ND	0.8547	ND	ND	0.8547		-0.22651
1763	P34949	289	MPI_HUMAN Mannose-6-phosphate isomerase OS=Homo sapiens OX=9606 GN=MPI PE=1 SV=2	ND	ND	ND	0.8547	0.8547		-0.22651
1764	P49810	65	PSN2_HUMAN Presenilin-2 OS=Homo sapiens OX=9606 GN=PSEN2 PE=1 SV=1	ND	0.8547	ND	ND	0.8547		-0.22651
1765	Q8ND76	39	CCNY_HUMAN Cyclin-Y OS=Homo sapiens OX=9606 GN=CCNY PE=1 SV=2	ND	ND	ND	0.8547	0.8547		-0.22651
1766	Q9BUB4	48	ADAT1_HUMAN tRNA-specific adenosine deaminase 1 OS=Homo sapiens OX=9606 GN=ADAT1 PE=1 SV=1	ND	ND	ND	0.8547	0.8547		-0.22651
1767	Q9H3H3	222	CK068_HUMAN UPF0696 protein C11orf68 OS=Homo sapiens OX=9606 GN=C11orf68 PE=1 SV=2	ND	ND	ND	0.8547	0.8547		-0.22651
1768	Q9HB58	283	SP110_HUMAN Sp110 nuclear body protein OS=Homo sapiens OX=9606 GN=SP110 PE=1 SV=5	ND	0.8547	ND	ND	0.8547		-0.22651
1769	Q15005	26	SPCS2_HUMAN Signal peptidase complex subunit 2 OS=Homo sapiens OX=9606 GN=SPCS2 PE=1 SV=3	0.84426	0.81301	0.89554	0.86595	0.85469	0.0348402	-0.226527
1770	P11216	326	PYGB_HUMAN Glycogen phosphorylase, brain form OS=Homo sapiens OX=9606 GN=PYGB PE=1 SV=5	0.94601	0.82086	0.84219	0.80921	0.854567	0.0624725	-0.226734
1771	Q9NX70	131	MED29_HUMAN Mediator of RNA polymerase II transcription subunit 29 OS=Homo sapiens OX=9606 GN=MED29 PE=1 SV=1	0.90909	0.84034	0.81301	ND	0.854147	0.0495057	-0.227444
1772	Q7Z7A3	290	CTU1_HUMAN Cytoplasmic tRNA 2-thiolation protein 1 OS=Homo sapiens OX=9606 GN=CTU1 PE=1 SV=1	0.73529	0.88496	0.92593	0.86957	0.853938	0.0825973	-0.227798
1773	Q13501	331	SQSTM_HUMAN Sequestosome-1 OS=Homo sapiens OX=9606 GN=SQSTM1 PE=1 SV=1	1	0.86207	ND	0.6993	0.85379	0.150521	-0.228047
1774	Q8N556	713	AFAP1_HUMAN Actin filament-associated protein 1 OS=Homo sapiens OX=9606 GN=AFAP1 PE=1 SV=2	ND	0.78125	0.92593	ND	0.85359	0.102304	-0.228385
1775	Q8N5K1	92	CISD2_HUMAN CDGSH iron-sulfur domain-containing protein 2 OS=Homo sapiens OX=9606 GN=CISD2 PE=1 SV=1	0.76336	0.75319	1.1001	0.79713	0.853445	0.165506	-0.22863	Mutagenesis	Note=Has the same optical signature of the native protein and improves yields of purified protein and a decreased tendency to aggregate. C->S;Ontology_term=ECO:0000269;evidence=ECO:0000269|PubMed:19580816;Dbxref=PMID:19580816
1776	Q12888	489	TP53B_HUMAN TP53-binding protein 1 OS=Homo sapiens OX=9606 GN=TP53BP1 PE=1 SV=2	ND	ND	ND	0.85249	0.85249		-0.230245
1777	Q9UF56	210	FXL17_HUMAN F-box/LRR-repeat protein 17 OS=Homo sapiens OX=9606 GN=FBXL17 PE=2 SV=3	ND	0.91743	0.7874	ND	0.852415	0.0919451	-0.230372
1778	P33527	1423	MRP1_HUMAN Multidrug resistance-associated protein 1 OS=Homo sapiens OX=9606 GN=ABCC1 PE=1 SV=3	0.79365	ND	0.90909	ND	0.85137	0.0816284	-0.232142
1779	Q8TC07	197	TBC15_HUMAN TBC1 domain family member 15 OS=Homo sapiens OX=9606 GN=TBC1D15 PE=1 SV=2	0.86207	0.87719	0.81301	ND	0.850757	0.0335524	-0.233182
1780	Q15005	17	SPCS2_HUMAN Signal peptidase complex subunit 2 OS=Homo sapiens OX=9606 GN=SPCS2 PE=1 SV=3	0.81197	0.84034	0.8558	0.89226	0.850092	0.033462	-0.234308
1781	Q16850	449	CP51A_HUMAN Lanosterol 14-alpha demethylase OS=Homo sapiens OX=9606 GN=CYP51A1 PE=1 SV=3	0.90909	0.75205	1.06383	0.67161	0.849145	0.173809	-0.235917	Metal binding	Note=Iron (heme axial ligand);Ontology_term=ECO:0000269;evidence=ECO:0000269|PubMed:20149798;Dbxref=PMID:20149798
1782	Q9P2E9	933	RRBP1_HUMAN Ribosome-binding protein 1 OS=Homo sapiens OX=9606 GN=RRBP1 PE=1 SV=5	0.81301	ND	0.88496	ND	0.848985	0.0508763	-0.236189
1783	O60610	1227	DIAP1_HUMAN Protein diaphanous homolog 1 OS=Homo sapiens OX=9606 GN=DIAPH1 PE=1 SV=2	0.9009	0.92532	0.71942	ND	0.848547	0.112492	-0.236934
1784	Q12802	972	AKP13_HUMAN A-kinase anchor protein 13 OS=Homo sapiens OX=9606 GN=AKAP13 PE=1 SV=2	ND	0.95238	0.744	ND	0.84819	0.147347	-0.237541
1785	O43159	451	RRP8_HUMAN Ribosomal RNA-processing protein 8 OS=Homo sapiens OX=9606 GN=RRP8 PE=1 SV=2	0.79365	1.06383	0.74627	0.7874	0.847787	0.145554	-0.238225
1786	C9JRZ8	187	AK1BF_HUMAN Aldo-keto reductase family 1 member B15 OS=Homo sapiens OX=9606 GN=AKR1B15 PE=1 SV=2	ND	0.84034	0.8547	ND	0.84752	0.0101541	-0.238681
1787	P19174	646	PLCG1_HUMAN 1-phosphatidylinositol 4,5-bisphosphate phosphodiesterase gamma-1 OS=Homo sapiens OX=9606 GN=PLCG1 PE=1 SV=1	ND	0.84746	ND	ND	0.84746		-0.238783
1788	P28290	305	SSFA2_HUMAN Sperm-specific antigen 2 OS=Homo sapiens OX=9606 GN=SSFA2 PE=1 SV=3	ND	ND	0.84746	0.84746	0.84746	0	-0.238783
1789	P78316	457	NOP14_HUMAN Nucleolar protein 14 OS=Homo sapiens OX=9606 GN=NOP14 PE=1 SV=3	ND	ND	0.84746	ND	0.84746		-0.238783
1790	Q16763	118	UBE2S_HUMAN Ubiquitin-conjugating enzyme E2 S OS=Homo sapiens OX=9606 GN=UBE2S PE=1 SV=2	ND	0.84746	ND	ND	0.84746		-0.238783
1791	Q6NXT6	487	TAPT1_HUMAN Transmembrane anterior posterior transformation protein 1 homolog OS=Homo sapiens OX=9606 GN=TAPT1 PE=1 SV=1	ND	0.84746	ND	ND	0.84746		-0.238783
1792	Q8IVL0	748	NAV3_HUMAN Neuron navigator 3 OS=Homo sapiens OX=9606 GN=NAV3 PE=1 SV=3	ND	ND	0.84746	ND	0.84746		-0.238783
1793	Q96I24	366	FUBP3_HUMAN Far upstream element-binding protein 3 OS=Homo sapiens OX=9606 GN=FUBP3 PE=1 SV=2	ND	ND	ND	0.84746	0.84746		-0.238783
1794	Q9NS56	550	TOPRS_HUMAN E3 ubiquitin-protein ligase Topors OS=Homo sapiens OX=9606 GN=TOPORS PE=1 SV=1	ND	ND	0.84746	ND	0.84746		-0.238783
1795	H7BZB9	137	H7BZB9_HUMAN Microtubule-associated protein 2 (Fragment) OS=Homo sapiens OX=9606 GN=MAP2 PE=1 SV=1	ND	0.98039	0.96154	0.5988	0.84691	0.215076	-0.239719
1796	Q96ST2	749	IWS1_HUMAN Protein IWS1 homolog OS=Homo sapiens OX=9606 GN=IWS1 PE=1 SV=2	0.88496	0.84034	0.80645	0.8547	0.846612	0.0326001	-0.240226
1797	Q8NHU6	692	TDRD7_HUMAN Tudor domain-containing protein 7 OS=Homo sapiens OX=9606 GN=TDRD7 PE=1 SV=2	ND	0.7874	0.90544	ND	0.84642	0.0834669	-0.240554
1798	Q07020	134	RL18_HUMAN 60S ribosomal protein L18 OS=Homo sapiens OX=9606 GN=RPL18 PE=1 SV=2	0.82055	0.86475	0.8526	0.84655	0.846113	0.0186465	-0.241079
1799	Q99569	492	PKP4_HUMAN Plakophilin-4 OS=Homo sapiens OX=9606 GN=PKP4 PE=1 SV=2	ND	0.78125	0.81301	0.9434	0.845887	0.0859291	-0.241464
1800	Q92615	679	LAR4B_HUMAN La-related protein 4B OS=Homo sapiens OX=9606 GN=LARP4B PE=1 SV=3	ND	0.84746	0.85647	0.83333	0.845753	0.011664	-0.241691
1801	Q5C9Z4	65	NOM1_HUMAN Nucleolar MIF4G domain-containing protein 1 OS=Homo sapiens OX=9606 GN=NOM1 PE=1 SV=1	ND	0.78125	0.90909	ND	0.84517	0.0903965	-0.242687
1802	O14974	553	MYPT1_HUMAN Protein phosphatase 1 regulatory subunit 12A OS=Homo sapiens OX=9606 GN=PPP1R12A PE=1 SV=1	ND	0.81301	ND	0.87719	0.8451	0.0453821	-0.242806
1803	O95159	230	ZFPL1_HUMAN Zinc finger protein-like 1 OS=Homo sapiens OX=9606 GN=ZFPL1 PE=1 SV=2	0.70922	0.81495	1.08696	0.76923	0.84509	0.166958	-0.242823
1804	Q6NUM9	105	RETST_HUMAN All-trans-retinol 13,14-reductase OS=Homo sapiens OX=9606 GN=RETSAT PE=1 SV=2	ND	0.74074	0.96154	0.83161	0.84463	0.110974	-0.243609
1805	Q9H6K4	164	OPA3_HUMAN Optic atrophy 3 protein OS=Homo sapiens OX=9606 GN=OPA3 PE=1 SV=1	ND	0.86957	0.81967	ND	0.84462	0.0352846	-0.243626
1806	P62140	126	PP1B_HUMAN Serine/threonine-protein phosphatase PP1-beta catalytic subunit OS=Homo sapiens OX=9606 GN=PPP1CB PE=1 SV=3	ND	0.83333	0.83612	0.86207	0.84384	0.0158492	-0.244959
1807	Q9BXB4	34	OSB11_HUMAN Oxysterol-binding protein-related protein 11 OS=Homo sapiens OX=9606 GN=OSBPL11 PE=1 SV=2	0.8547	0.81967	ND	0.8547	0.843023	0.0202246	-0.246356
1808	Q12789	544	TF3C1_HUMAN General transcription factor 3C polypeptide 1 OS=Homo sapiens OX=9606 GN=GTF3C1 PE=1 SV=4	0.81967	ND	0.8654	ND	0.842535	0.032336	-0.247191
1809	Q9UQ35	785	SRRM2_HUMAN Serine/arginine repetitive matrix protein 2 OS=Homo sapiens OX=9606 GN=SRRM2 PE=1 SV=2	0.78348	ND	0.75362	0.9901	0.8424	0.12878	-0.247423
1810	P45985	379	MP2K4_HUMAN Dual specificity mitogen-activated protein kinase kinase 4 OS=Homo sapiens OX=9606 GN=MAP2K4 PE=1 SV=1	0.69444	0.89731	0.9434	0.83333	0.84212	0.108305	-0.247902
1811	Q9UHI6	524	DDX20_HUMAN Probable ATP-dependent RNA helicase DDX20 OS=Homo sapiens OX=9606 GN=DDX20 PE=1 SV=2	ND	0.84034	0.85791	0.82645	0.841567	0.0157658	-0.248851
1812	P42166	341	LAP2A_HUMAN Lamina-associated polypeptide 2, isoform alpha OS=Homo sapiens OX=9606 GN=TMPO PE=1 SV=2	ND	0.74214	0.75188	1.03006	0.84136	0.163492	-0.249205
1813	P21283	15	VATC1_HUMAN V-type proton ATPase subunit C 1 OS=Homo sapiens OX=9606 GN=ATP6V1C1 PE=1 SV=4	ND	ND	0.83925	0.84207	0.84066	0.00199404	-0.250406
1814	Q9H0H5	389	RGAP1_HUMAN Rac GTPase-activating protein 1 OS=Homo sapiens OX=9606 GN=RACGAP1 PE=1 SV=1	0.84746	ND	0.83356	0.84034	0.840453	0.00695069	-0.25076
1815	A7MD96	152	A7MD96_HUMAN SYNPO protein (Fragment) OS=Homo sapiens OX=9606 GN=SYNPO PE=2 SV=1	0.84034	ND	ND	ND	0.84034		-0.250955
1816	O60927	62	PP1RB_HUMAN E3 ubiquitin-protein ligase PPP1R11 OS=Homo sapiens OX=9606 GN=PPP1R11 PE=1 SV=1	0.84034	ND	ND	ND	0.84034		-0.250955	Mutagenesis	Note=Loss of function in inducing TLR2 degradation. CCC->SSS;Ontology_term=ECO:0000269;evidence=ECO:0000269|PubMed:27805901;Dbxref=PMID:27805901
1817	Q14353	91	GAMT_HUMAN Guanidinoacetate N-methyltransferase OS=Homo sapiens OX=9606 GN=GAMT PE=1 SV=1	ND	0.84034	ND	ND	0.84034		-0.250955
1818	Q15477	247	SKIV2_HUMAN Helicase SKI2W OS=Homo sapiens OX=9606 GN=SKIV2L PE=1 SV=3	ND	ND	ND	0.84034	0.84034		-0.250955
1819	Q7Z6Z7	1891	HUWE1_HUMAN E3 ubiquitin-protein ligase HUWE1 OS=Homo sapiens OX=9606 GN=HUWE1 PE=1 SV=3	0.84034	ND	ND	ND	0.84034		-0.250955
1820	Q96RS6	402	NUDC1_HUMAN NudC domain-containing protein 1 OS=Homo sapiens OX=9606 GN=NUDCD1 PE=1 SV=2	ND	ND	ND	0.84034	0.84034		-0.250955
1821	Q9BTC0	976	DIDO1_HUMAN Death-inducer obliterator 1 OS=Homo sapiens OX=9606 GN=DIDO1 PE=1 SV=5	ND	0.84034	ND	ND	0.84034		-0.250955
1822	Q92609	676	TBCD5_HUMAN TBC1 domain family member 5 OS=Homo sapiens OX=9606 GN=TBC1D5 PE=1 SV=1	0.8	0.9009	ND	0.81967	0.84019	0.0534884	-0.251212
1823	P53041	11	PPP5_HUMAN Serine/threonine-protein phosphatase 5 OS=Homo sapiens OX=9606 GN=PPP5C PE=1 SV=1	0.73933	0.98959	0.78484	0.84483	0.839647	0.108899	-0.252144
1824	P49327	1118	FAS_HUMAN Fatty acid synthase OS=Homo sapiens OX=9606 GN=FASN PE=1 SV=3	0.75188	0.8547	0.90909	ND	0.838557	0.0798386	-0.25402
1825	Q96ME7	35	ZN512_HUMAN Zinc finger protein 512 OS=Homo sapiens OX=9606 GN=ZNF512 PE=1 SV=2	0.81301	0.87719	0.83339	0.82645	0.83751	0.0277732	-0.255822
1826	P49753	401	ACOT2_HUMAN Acyl-coenzyme A thioesterase 2, mitochondrial OS=Homo sapiens OX=9606 GN=ACOT2 PE=1 SV=6	0.85174	0.7634	0.8547	0.87849	0.837082	0.0505599	-0.256558
1827	Q9P270	306	SLAI2_HUMAN SLAIN motif-containing protein 2 OS=Homo sapiens OX=9606 GN=SLAIN2 PE=1 SV=2	ND	0.7874	ND	0.88496	0.83618	0.0689853	-0.258115
1828	P35579	1379	MYH9_HUMAN Myosin-9 OS=Homo sapiens OX=9606 GN=MYH9 PE=1 SV=4	ND	1.03102	0.64105	ND	0.836035	0.27575	-0.258365
1829	Q8IVF2	405	AHNK2_HUMAN Protein AHNAK2 OS=Homo sapiens OX=9606 GN=AHNAK2 PE=1 SV=2	0.83385	ND	0.8	0.87215	0.835333	0.0360979	-0.259576
1830	Q9BVJ6	522	UT14A_HUMAN U3 small nucleolar RNA-associated protein 14 homolog A OS=Homo sapiens OX=9606 GN=UTP14A PE=1 SV=1	ND	0.79365	0.87418	ND	0.833915	0.0569433	-0.262028
1831	Q9NVS9	156	PNPO_HUMAN Pyridoxine-5'-phosphate oxidase OS=Homo sapiens OX=9606 GN=PNPO PE=1 SV=1	ND	0.93458	0.71942	0.84746	0.83382	0.108227	-0.262192
1832	P52630	529	STAT2_HUMAN Signal transducer and activator of transcription 2 OS=Homo sapiens OX=9606 GN=STAT2 PE=1 SV=1	ND	0.51813	1.14943	ND	0.83378	0.446397	-0.262261
1833	Q02241	447	KIF23_HUMAN Kinesin-like protein KIF23 OS=Homo sapiens OX=9606 GN=KIF23 PE=1 SV=3	ND	ND	1.23457	0.4329	0.833735	0.566866	-0.262339
1834	P09234	25	RU1C_HUMAN U1 small nuclear ribonucleoprotein C OS=Homo sapiens OX=9606 GN=SNRPC PE=1 SV=1	ND	0.83333	ND	0.8338	0.833565	0.00033234	-0.262633	Mutagenesis	Note=No effect. C->S;Ontology_term=ECO:0000269;evidence=ECO:0000269|PubMed:1826349;Dbxref=PMID:1826349
1835	E9PHM6	5355	E9PHM6_HUMAN Dystonin OS=Homo sapiens OX=9606 GN=DST PE=1 SV=3	ND	0.83333	ND	ND	0.83333		-0.26304
1836	Q14789	681	GOGB1_HUMAN Golgin subfamily B member 1 OS=Homo sapiens OX=9606 GN=GOLGB1 PE=1 SV=2	ND	0.83333	ND	ND	0.83333		-0.26304
1837	Q1ED39	184	KNOP1_HUMAN Lysine-rich nucleolar protein 1 OS=Homo sapiens OX=9606 GN=KNOP1 PE=1 SV=1	ND	0.83333	ND	ND	0.83333		-0.26304
1838	Q3V6T2	1729	GRDN_HUMAN Girdin OS=Homo sapiens OX=9606 GN=CCDC88A PE=1 SV=2	ND	0.83333	ND	ND	0.83333		-0.26304
1839	Q8TBE9	67	NANP_HUMAN N-acylneuraminate-9-phosphatase OS=Homo sapiens OX=9606 GN=NANP PE=1 SV=1	ND	0.83333	ND	ND	0.83333		-0.26304
1840	Q9NWH9	568	SLTM_HUMAN SAFB-like transcription modulator OS=Homo sapiens OX=9606 GN=SLTM PE=1 SV=2	ND	0.83333	ND	ND	0.83333		-0.26304
1841	Q8WV74	224	NUDT8_HUMAN Nucleoside diphosphate-linked moiety X motif 8 OS=Homo sapiens OX=9606 GN=NUDT8 PE=1 SV=2	ND	0.76923	0.75758	0.97087	0.83256	0.119922	-0.264374
1842	Q7Z4W1	138	DCXR_HUMAN L-xylulose reductase OS=Homo sapiens OX=9606 GN=DCXR PE=1 SV=2	0.81301	0.81301	0.88992	0.81301	0.832237	0.038455	-0.264933
1843	Q9BW04	338	SARG_HUMAN Specifically androgen-regulated gene protein OS=Homo sapiens OX=9606 GN=SARG PE=1 SV=2	ND	0.81301	0.80645	0.87719	0.832217	0.0390859	-0.264969
1844	Q6P2Q9	435	PRP8_HUMAN Pre-mRNA-processing-splicing factor 8 OS=Homo sapiens OX=9606 GN=PRPF8 PE=1 SV=2	ND	0.87719	0.87007	0.74074	0.829333	0.0768066	-0.269976
1845	Q13501	289	SQSTM_HUMAN Sequestosome-1 OS=Homo sapiens OX=9606 GN=SQSTM1 PE=1 SV=1	0.88001	0.8547	0.74627	0.83333	0.828577	0.0580942	-0.271291
1846	Q8TEQ6	1421	GEMI5_HUMAN Gem-associated protein 5 OS=Homo sapiens OX=9606 GN=GEMIN5 PE=1 SV=3	ND	0.8547	ND	0.8	0.82735	0.0386787	-0.27343
1847	A4D1I0	1091	A4D1I0_HUMAN HCG1741805, isoform CRA_c OS=Homo sapiens OX=9606 GN=PPP1R9A PE=4 SV=1	ND	ND	0.82645	ND	0.82645		-0.275001
1848	P00338	131	LDHA_HUMAN L-lactate dehydrogenase A chain OS=Homo sapiens OX=9606 GN=LDHA PE=1 SV=2	0.82645	ND	ND	ND	0.82645		-0.275001
1849	P38398	712	BRCA1_HUMAN Breast cancer type 1 susceptibility protein OS=Homo sapiens OX=9606 GN=BRCA1 PE=1 SV=2	ND	ND	ND	0.82645	0.82645		-0.275001
1850	P49023	108	PAXI_HUMAN Paxillin OS=Homo sapiens OX=9606 GN=PXN PE=1 SV=3	ND	ND	ND	0.82645	0.82645		-0.275001
1851	Q04637	662	IF4G1_HUMAN Eukaryotic translation initiation factor 4 gamma 1 OS=Homo sapiens OX=9606 GN=EIF4G1 PE=1 SV=4	0.82645	ND	ND	ND	0.82645		-0.275001
1852	Q06210	264	GFPT1_HUMAN Glutamine--fructose-6-phosphate aminotransferase [isomerizing] 1 OS=Homo sapiens OX=9606 GN=GFPT1 PE=1 SV=3	ND	ND	0.82645	ND	0.82645		-0.275001
1853	Q6VY07	616	PACS1_HUMAN Phosphofurin acidic cluster sorting protein 1 OS=Homo sapiens OX=9606 GN=PACS1 PE=1 SV=2	ND	0.82645	ND	ND	0.82645		-0.275001
1854	Q9NZN5	784	ARHGC_HUMAN Rho guanine nucleotide exchange factor 12 OS=Homo sapiens OX=9606 GN=ARHGEF12 PE=1 SV=1	ND	ND	0.82645	ND	0.82645		-0.275001
1855	Q15361	445	TTF1_HUMAN Transcription termination factor 1 OS=Homo sapiens OX=9606 GN=TTF1 PE=1 SV=3	ND	0.83333	0.78125	0.86207	0.82555	0.0409678	-0.276572
1856	Q96T51	81	RUFY1_HUMAN RUN and FYVE domain-containing protein 1 OS=Homo sapiens OX=9606 GN=RUFY1 PE=1 SV=2	ND	0.84746	0.77593	0.85145	0.824947	0.0424965	-0.277627
1857	Q9UBH6	188	XPR1_HUMAN Xenotropic and polytropic retrovirus receptor 1 OS=Homo sapiens OX=9606 GN=XPR1 PE=1 SV=1	ND	0.79336	0.85517	ND	0.824265	0.0437063	-0.27882
1858	Q96L91	3158	EP400_HUMAN E1A-binding protein p400 OS=Homo sapiens OX=9606 GN=EP400 PE=1 SV=4	ND	0.91743	0.72993	ND	0.82368	0.132583	-0.279844
1859	A2A2Z9	773	AN18B_HUMAN Ankyrin repeat domain-containing protein 18B OS=Homo sapiens OX=9606 GN=ANKRD18B PE=1 SV=1	0.82645	ND	ND	0.81967	0.82306	0.00479418	-0.28093
1860	P78347	215	GTF2I_HUMAN General transcription factor II-I OS=Homo sapiens OX=9606 GN=GTF2I PE=1 SV=2	0.75054	0.78988	0.89112	0.86041	0.822987	0.0642579	-0.281058
1861	P62979	149	RS27A_HUMAN Ubiquitin-40S ribosomal protein S27a OS=Homo sapiens OX=9606 GN=RPS27A PE=1 SV=2	0.86957	0.71942	0.87719	ND	0.82206	0.0889705	-0.282684
1862	P21333	1402	FLNA_HUMAN Filamin-A OS=Homo sapiens OX=9606 GN=FLNA PE=1 SV=4	ND	0.76689	0.87274	0.82645	0.822027	0.0530635	-0.282743
1863	Q9Y4I1	535	MYO5A_HUMAN Unconventional myosin-Va OS=Homo sapiens OX=9606 GN=MYO5A PE=1 SV=2	0.77519	0.90171	0.77513	0.83594	0.821993	0.0603765	-0.282803
1864	Q14533	441	KRT81_HUMAN Keratin, type II cuticular Hb1 OS=Homo sapiens OX=9606 GN=KRT81 PE=1 SV=3	0.87481	0.76798	ND	ND	0.821395	0.0755402	-0.283852
1865	O43790	273	KRT86_HUMAN Keratin, type II cuticular Hb6 OS=Homo sapiens OX=9606 GN=KRT86 PE=1 SV=1	0.81301	0.89311	ND	0.75758	0.821233	0.0681382	-0.284136
1866	Q96ME7	324	ZN512_HUMAN Zinc finger protein 512 OS=Homo sapiens OX=9606 GN=ZNF512 PE=1 SV=2	ND	0.83333	0.78125	0.84746	0.82068	0.0348706	-0.285108
1867	O94808	247	GFPT2_HUMAN Glutamine--fructose-6-phosphate aminotransferase [isomerizing] 2 OS=Homo sapiens OX=9606 GN=GFPT2 PE=1 SV=3	0.79968	0.9913	0.80046	0.68966	0.820275	0.125335	-0.28582
1868	P18583	1551	SON_HUMAN Protein SON OS=Homo sapiens OX=9606 GN=SON PE=1 SV=4	ND	ND	ND	0.81967	0.81967		-0.286885
1869	Q6ZV73	1193	FGD6_HUMAN FYVE, RhoGEF and PH domain-containing protein 6 OS=Homo sapiens OX=9606 GN=FGD6 PE=1 SV=2	ND	0.81967	ND	ND	0.81967		-0.286885
1870	Q969V6	508	MKL1_HUMAN MKL/myocardin-like protein 1 OS=Homo sapiens OX=9606 GN=MKL1 PE=1 SV=1	ND	0.81967	ND	ND	0.81967		-0.286885
1871	Q96GX2	75	A7L3B_HUMAN Ataxin-7-like protein 3B OS=Homo sapiens OX=9606 GN=ATXN7L3B PE=1 SV=2	ND	0.81967	ND	ND	0.81967		-0.286885
1872	Q96LD4	468	TRI47_HUMAN Tripartite motif-containing protein 47 OS=Homo sapiens OX=9606 GN=TRIM47 PE=1 SV=2	ND	ND	0.81967	ND	0.81967		-0.286885
1873	Q9BQA5	327	HINFP_HUMAN Histone H4 transcription factor OS=Homo sapiens OX=9606 GN=HINFP PE=1 SV=2	ND	0.81967	ND	ND	0.81967		-0.286885
1874	P38936	13	CDN1A_HUMAN Cyclin-dependent kinase inhibitor 1 OS=Homo sapiens OX=9606 GN=CDKN1A PE=1 SV=3	ND	1.02567	ND	0.61352	0.819595	0.291434	-0.287017
1875	Q02952	1479	AKA12_HUMAN A-kinase anchor protein 12 OS=Homo sapiens OX=9606 GN=AKAP12 PE=1 SV=4	0.86957	0.71942	ND	0.86957	0.81952	0.0866891	-0.287149
1876	Q8IYQ7	324	THNS1_HUMAN Threonine synthase-like 1 OS=Homo sapiens OX=9606 GN=THNSL1 PE=1 SV=2	0.96154	0.70245	0.79365	ND	0.819213	0.131423	-0.287689
1877	O60936	124	NOL3_HUMAN Nucleolar protein 3 OS=Homo sapiens OX=9606 GN=NOL3 PE=1 SV=2	ND	0.80903	0.79365	0.85231	0.81833	0.0304157	-0.289245
1878	Q14160	496	SCRIB_HUMAN Protein scribble homolog OS=Homo sapiens OX=9606 GN=SCRIB PE=1 SV=4	0.91743	0.80645	0.72464	ND	0.816173	0.0967621	-0.293053
1879	Q8NFJ5	284	RAI3_HUMAN Retinoic acid-induced protein 3 OS=Homo sapiens OX=9606 GN=GPRC5A PE=1 SV=2	0.68474	0.75356	0.75118	1.07388	0.81584	0.174959	-0.293642
1880	P28715	550	ERCC5_HUMAN DNA repair protein complementing XP-G cells OS=Homo sapiens OX=9606 GN=ERCC5 PE=1 SV=3	ND	0.90909	0.72464	0.81301	0.81558	0.0922519	-0.294102
1881	Q9HA92	53	RSAD1_HUMAN Radical S-adenosyl methionine domain-containing protein 1, mitochondrial OS=Homo sapiens OX=9606 GN=RSAD1 PE=2 SV=2	ND	0.78125	0.84746	ND	0.814355	0.0468175	-0.29627	Metal binding	Note=Iron-sulfur (4Fe-4S-S-AdoMet);Ontology_term=ECO:0000250;evidence=ECO:0000250|UniProtKB:P32131
1882	Q14684	155	RRP1B_HUMAN Ribosomal RNA processing protein 1 homolog B OS=Homo sapiens OX=9606 GN=RRP1B PE=1 SV=3	ND	1.0989	0.5291	ND	0.814	0.402909	-0.296899
1883	Q6NZY4	607	ZCHC8_HUMAN Zinc finger CCHC domain-containing protein 8 OS=Homo sapiens OX=9606 GN=ZCCHC8 PE=1 SV=2	0.89286	0.69444	0.8547	ND	0.814	0.105285	-0.296899
1884	O60658	338	PDE8A_HUMAN High affinity cAMP-specific and IBMX-insensitive 3',5'-cyclic phosphodiesterase 8A OS=Homo sapiens OX=9606 GN=PDE8A PE=1 SV=2	ND	ND	ND	0.81301	0.81301		-0.298655
1885	P28290	859	SSFA2_HUMAN Sperm-specific antigen 2 OS=Homo sapiens OX=9606 GN=SSFA2 PE=1 SV=3	ND	0.81301	ND	ND	0.81301		-0.298655
1886	Q5SRE5	1270	NU188_HUMAN Nucleoporin NUP188 homolog OS=Homo sapiens OX=9606 GN=NUP188 PE=1 SV=1	ND	ND	0.81301	ND	0.81301		-0.298655
1887	Q8WTP8	93	AEN_HUMAN Apoptosis-enhancing nuclease OS=Homo sapiens OX=9606 GN=AEN PE=1 SV=2	ND	ND	0.81301	ND	0.81301		-0.298655
1888	Q9Y4R8	628	TELO2_HUMAN Telomere length regulation protein TEL2 homolog OS=Homo sapiens OX=9606 GN=TELO2 PE=1 SV=2	ND	0.71675	ND	0.90909	0.81292	0.136005	-0.298815
1889	O15269	133	SPTC1_HUMAN Serine palmitoyltransferase 1 OS=Homo sapiens OX=9606 GN=SPTLC1 PE=1 SV=1	0.9434	0.76923	0.75758	0.78125	0.812865	0.0875582	-0.298912
1890	Q96GX9	147	MTNB_HUMAN Methylthioribulose-1-phosphate dehydratase OS=Homo sapiens OX=9606 GN=APIP PE=1 SV=1	0.86957	0.79258	0.79132	0.79572	0.812298	0.0382265	-0.29992
1891	Q9UPN9	754	TRI33_HUMAN E3 ubiquitin-protein ligase TRIM33 OS=Homo sapiens OX=9606 GN=TRIM33 PE=1 SV=3	ND	0.81301	0.77519	0.84746	0.811887	0.0361481	-0.30065
1892	Q7L2E3	346	DHX30_HUMAN Putative ATP-dependent RNA helicase DHX30 OS=Homo sapiens OX=9606 GN=DHX30 PE=1 SV=1	ND	0.8	0.88496	0.74627	0.81041	0.0699286	-0.303276
1893	Q99439	164	CNN2_HUMAN Calponin-2 OS=Homo sapiens OX=9606 GN=CNN2 PE=1 SV=4	ND	0.73529	0.75188	0.9434	0.81019	0.115661	-0.303668
1894	Q9NUQ6	533	SPS2L_HUMAN SPATS2-like protein OS=Homo sapiens OX=9606 GN=SPATS2L PE=1 SV=2	0.81973	0.82105	0.79683	0.80159	0.8098	0.0123934	-0.304362
1895	O95671	333	ASML_HUMAN N-acetylserotonin O-methyltransferase-like protein OS=Homo sapiens OX=9606 GN=ASMTL PE=1 SV=3	ND	ND	0.96154	0.65789	0.809715	0.214713	-0.304514
1896	A0A024RA80	39	A0A024RA80_HUMAN Thioredoxin domain containing 3 (Spermatozoa), isoform CRA_a OS=Homo sapiens OX=9606 GN=TXNDC3 PE=4 SV=1	ND	0.69625	0.93122	0.79845	0.80864	0.117816	-0.306431
1897	Q96CP6	576	GRM1A_HUMAN GRAM domain-containing protein 1A OS=Homo sapiens OX=9606 GN=GRAMD1A PE=1 SV=2	0.77128	0.81306	0.78628	0.86325	0.808468	0.0404038	-0.306738
1898	Q8WV74	207	NUDT8_HUMAN Nucleoside diphosphate-linked moiety X motif 8 OS=Homo sapiens OX=9606 GN=NUDT8 PE=1 SV=2	0.82645	0.79365	0.74627	0.86207	0.80711	0.0492521	-0.309163
1899	Q9HB90	377	RRAGC_HUMAN Ras-related GTP-binding protein C OS=Homo sapiens OX=9606 GN=RRAGC PE=1 SV=1	0.80645	0.82425	0.78965	0.80776	0.807028	0.0141358	-0.30931
1900	Q9HAV7	124	GRPE1_HUMAN GrpE protein homolog 1, mitochondrial OS=Homo sapiens OX=9606 GN=GRPEL1 PE=1 SV=2	ND	0.79365	0.8	0.82645	0.8067	0.0173962	-0.309896
1901	Q6WCQ1	503	MPRIP_HUMAN Myosin phosphatase Rho-interacting protein OS=Homo sapiens OX=9606 GN=MPRIP PE=1 SV=3	ND	ND	0.79365	0.81967	0.80666	0.0183989	-0.309967
1902	P62979	144	RS27A_HUMAN Ubiquitin-40S ribosomal protein S27a OS=Homo sapiens OX=9606 GN=RPS27A PE=1 SV=2	ND	0.80645	ND	ND	0.80645		-0.310343
1903	Q7Z5J4	1516	RAI1_HUMAN Retinoic acid-induced protein 1 OS=Homo sapiens OX=9606 GN=RAI1 PE=1 SV=2	ND	ND	ND	0.80645	0.80645		-0.310343
1904	Q9H3K6	33	BOLA2_HUMAN BolA-like protein 2 OS=Homo sapiens OX=9606 GN=BOLA2 PE=1 SV=1	ND	ND	0.80645	ND	0.80645		-0.310343
1905	Q9UPU7	387	TBD2B_HUMAN TBC1 domain family member 2B OS=Homo sapiens OX=9606 GN=TBC1D2B PE=1 SV=2	ND	0.80645	ND	ND	0.80645		-0.310343
1906	P49756	612	RBM25_HUMAN RNA-binding protein 25 OS=Homo sapiens OX=9606 GN=RBM25 PE=1 SV=3	ND	0.89286	0.71942	ND	0.80614	0.122641	-0.310898
1907	P04183	66	KITH_HUMAN Thymidine kinase, cytosolic OS=Homo sapiens OX=9606 GN=TK1 PE=1 SV=2	ND	0.84034	0.79278	0.78491	0.80601	0.0299899	-0.31113
1908	Q9UQ35	1016	SRRM2_HUMAN Serine/arginine repetitive matrix protein 2 OS=Homo sapiens OX=9606 GN=SRRM2 PE=1 SV=2	0.8	0.82317	0.81301	0.7874	0.805895	0.0155549	-0.311336
1909	Q08379	794	GOGA2_HUMAN Golgin subfamily A member 2 OS=Homo sapiens OX=9606 GN=GOLGA2 PE=1 SV=3	0.80645	0.81294	0.81949	0.78437	0.805813	0.0152541	-0.311484
1910	Q6NUM9	106	RETST_HUMAN All-trans-retinol 13,14-reductase OS=Homo sapiens OX=9606 GN=RETSAT PE=1 SV=2	ND	ND	0.74074	0.86957	0.805155	0.0910966	-0.312662
1911	P42224	155	STAT1_HUMAN Signal transducer and activator of transcription 1-alpha/beta OS=Homo sapiens OX=9606 GN=STAT1 PE=1 SV=2	0.6993	0.86989	0.88884	0.75758	0.803902	0.0906572	-0.314908
1912	Q8WUM9	403	S20A1_HUMAN Sodium-dependent phosphate transporter 1 OS=Homo sapiens OX=9606 GN=SLC20A1 PE=1 SV=1	ND	ND	0.82645	0.78125	0.80385	0.0319612	-0.315002
1913	P29590	484	PML_HUMAN Protein PML OS=Homo sapiens OX=9606 GN=PML PE=1 SV=3	0.54348	0.74786	0.95238	0.97087	0.803647	0.200735	-0.315365
1914	P53396	845	ACLY_HUMAN ATP-citrate synthase OS=Homo sapiens OX=9606 GN=ACLY PE=1 SV=3	0.71011	0.81818	0.80676	0.87936	0.803603	0.070006	-0.315446
1915	Q9BT17	262	MTG1_HUMAN Mitochondrial ribosome-associated GTPase 1 OS=Homo sapiens OX=9606 GN=MTG1 PE=1 SV=2	ND	0.72993	0.87719	ND	0.80356	0.104129	-0.315522
1916	O60343	74	TBCD4_HUMAN TBC1 domain family member 4 OS=Homo sapiens OX=9606 GN=TBC1D4 PE=1 SV=2	ND	ND	0.80645	0.8	0.803225	0.00456084	-0.316124
1917	Q9H0W8	380	SMG9_HUMAN Protein SMG9 OS=Homo sapiens OX=9606 GN=SMG9 PE=1 SV=1	0.81158	0.80505	0.82527	0.76912	0.802755	0.023954	-0.316968
1918	Q1ED39	78	KNOP1_HUMAN Lysine-rich nucleolar protein 1 OS=Homo sapiens OX=9606 GN=KNOP1 PE=1 SV=1	0.82645	ND	0.78125	0.8	0.802567	0.022709	-0.317307
1919	Q6UB35	61	C1TM_HUMAN Monofunctional C1-tetrahydrofolate synthase, mitochondrial OS=Homo sapiens OX=9606 GN=MTHFD1L PE=1 SV=1	0.59172	0.7729	1.10832	0.73204	0.801245	0.218928	-0.319685
1920	Q9UPQ0	577	LIMC1_HUMAN LIM and calponin homology domains-containing protein 1 OS=Homo sapiens OX=9606 GN=LIMCH1 PE=1 SV=4	ND	0.8547	ND	0.74627	0.800485	0.0766716	-0.321054
1921	H3BPE1	661	H3BPE1_HUMAN Microtubule-actin cross-linking factor 1, isoforms 1/2/3/5 OS=Homo sapiens OX=9606 GN=MACF1 PE=1 SV=1	ND	ND	ND	0.8	0.8		-0.321928
1922	O15226	424	NKRF_HUMAN NF-kappa-B-repressing factor OS=Homo sapiens OX=9606 GN=NKRF PE=1 SV=2	ND	ND	ND	0.8	0.8		-0.321928
1923	O75663	87	TIPRL_HUMAN TIP41-like protein OS=Homo sapiens OX=9606 GN=TIPRL PE=1 SV=2	ND	ND	0.8	ND	0.8		-0.321928
1924	Q12789	1681	TF3C1_HUMAN General transcription factor 3C polypeptide 1 OS=Homo sapiens OX=9606 GN=GTF3C1 PE=1 SV=4	ND	ND	0.8	ND	0.8		-0.321928
1925	P46821	1814	MAP1B_HUMAN Microtubule-associated protein 1B OS=Homo sapiens OX=9606 GN=MAP1B PE=1 SV=2	0.70922	0.71952	ND	0.97087	0.79987	0.14818	-0.322163
1926	Q86YV5	322	PRAG1_HUMAN Inactive tyrosine-protein kinase PRAG1 OS=Homo sapiens OX=9606 GN=PRAG1 PE=1 SV=4	0.82645	0.8547	0.71429	ND	0.79848	0.0742663	-0.324672
1927	Q9UJX3	329	APC7_HUMAN Anaphase-promoting complex subunit 7 OS=Homo sapiens OX=9606 GN=ANAPC7 PE=1 SV=4	0.86207	0.72464	0.80645	0.8	0.79829	0.0564556	-0.325015
1928	P15121	299	ALDR_HUMAN Aldose reductase OS=Homo sapiens OX=9606 GN=AKR1B1 PE=1 SV=3	0.77371	0.94204	0.76951	0.70672	0.797995	0.100799	-0.325548
1929	Q9NUQ6	536	SPS2L_HUMAN SPATS2-like protein OS=Homo sapiens OX=9606 GN=SPATS2L PE=1 SV=2	0.81973	ND	0.78396	0.78916	0.797617	0.0193264	-0.326233
1930	Q13501	290	SQSTM_HUMAN Sequestosome-1 OS=Homo sapiens OX=9606 GN=SQSTM1 PE=1 SV=1	0.74359	0.75188	0.89286	ND	0.79611	0.0838904	-0.32896
1931	Q68CZ2	85	TENS3_HUMAN Tensin-3 OS=Homo sapiens OX=9606 GN=TNS3 PE=1 SV=2	ND	0.88496	0.76923	0.72993	0.794707	0.0805939	-0.331506
1932	Q5RGS4	311	Q5RGS4_HUMAN Pleckstrin homology domain-containing family A member 1 OS=Homo sapiens OX=9606 GN=PLEKHA1 PE=1 SV=1	0.86207	0.72464	0.86207	0.72993	0.794678	0.0778481	-0.331559
1933	P51610	1139	HCFC1_HUMAN Host cell factor 1 OS=Homo sapiens OX=9606 GN=HCFC1 PE=1 SV=2	0.78125	0.8	0.81301	0.78125	0.793878	0.0155182	-0.333012
1934	Q9Y5S2	1517	MRCKB_HUMAN Serine/threonine-protein kinase MRCK beta OS=Homo sapiens OX=9606 GN=CDC42BPB PE=1 SV=2	0.77313	0.85039	0.77633	0.77519	0.79376	0.0377766	-0.333225
1935	Q6ZN16	1291	M3K15_HUMAN Mitogen-activated protein kinase kinase kinase 15 OS=Homo sapiens OX=9606 GN=MAP3K15 PE=1 SV=2	ND	ND	0.79365	ND	0.79365		-0.333425
1936	Q709C8	2440	VP13C_HUMAN Vacuolar protein sorting-associated protein 13C OS=Homo sapiens OX=9606 GN=VPS13C PE=1 SV=1	ND	0.79365	ND	ND	0.79365		-0.333425
1937	P32320	14	CDD_HUMAN Cytidine deaminase OS=Homo sapiens OX=9606 GN=CDA PE=1 SV=2	ND	0.79321	ND	ND	0.79321		-0.334225
1938	Q15021	767	CND1_HUMAN Condensin complex subunit 1 OS=Homo sapiens OX=9606 GN=NCAPD2 PE=1 SV=3	0.77883	0.76421	0.83778	0.79112	0.792985	0.0318247	-0.334635
1939	Q8N1G4	249	LRC47_HUMAN Leucine-rich repeat-containing protein 47 OS=Homo sapiens OX=9606 GN=LRRC47 PE=1 SV=1	ND	0.82645	0.57803	0.97087	0.791783	0.198701	-0.336822
1940	O75815	449	BCAR3_HUMAN Breast cancer anti-estrogen resistance protein 3 OS=Homo sapiens OX=9606 GN=BCAR3 PE=1 SV=1	ND	0.71942	0.86207	ND	0.790745	0.100869	-0.338716
1941	P23396	97	RS3_HUMAN 40S ribosomal protein S3 OS=Homo sapiens OX=9606 GN=RPS3 PE=1 SV=2	0.68966	0.98754	0.69467	ND	0.790623	0.170553	-0.338938
1942	Q8TBF2	44	PGFS_HUMAN Prostamide/prostaglandin F synthase OS=Homo sapiens OX=9606 GN=FAM213B PE=1 SV=1	0.81967	0.77519	0.77529	0.79063	0.790195	0.0209466	-0.339719
1943	A0A087X106	273	A0A087X106_HUMAN Keratin, type II cuticular Hb1 OS=Homo sapiens OX=9606 GN=KRT81 PE=1 SV=1	ND	ND	0.78983	ND	0.78983		-0.340386
1944	P29590	479	PML_HUMAN Protein PML OS=Homo sapiens OX=9606 GN=PML PE=1 SV=3	ND	ND	0.72993	0.84746	0.788695	0.0831063	-0.342461
1945	P51610	1166	HCFC1_HUMAN Host cell factor 1 OS=Homo sapiens OX=9606 GN=HCFC1 PE=1 SV=2	0.84034	0.68966	ND	0.83333	0.787777	0.0850438	-0.344141
1946	O14976	1142	GAK_HUMAN Cyclin-G-associated kinase OS=Homo sapiens OX=9606 GN=GAK PE=1 SV=2	ND	ND	0.7874	ND	0.7874		-0.344831
1947	Q03001	5610	DYST_HUMAN Dystonin OS=Homo sapiens OX=9606 GN=DST PE=1 SV=4	ND	ND	0.7874	ND	0.7874		-0.344831
1948	Q86XL3	674	ANKL2_HUMAN Ankyrin repeat and LEM domain-containing protein 2 OS=Homo sapiens OX=9606 GN=ANKLE2 PE=1 SV=4	ND	0.7874	ND	ND	0.7874		-0.344831
1949	Q8N3C0	310	ASCC3_HUMAN Activating signal cointegrator 1 complex subunit 3 OS=Homo sapiens OX=9606 GN=ASCC3 PE=1 SV=3	0.7874	ND	ND	ND	0.7874		-0.344831
1950	Q93099	418	HGD_HUMAN Homogentisate 1,2-dioxygenase OS=Homo sapiens OX=9606 GN=HGD PE=1 SV=2	ND	ND	1.03093	0.54348	0.787205	0.344679	-0.345189
1951	Q8N3C0	2101	ASCC3_HUMAN Activating signal cointegrator 1 complex subunit 3 OS=Homo sapiens OX=9606 GN=ASCC3 PE=1 SV=3	ND	0.77519	0.72993	0.8547	0.786607	0.0631636	-0.346286
1952	Q5VZL5	1264	ZMYM4_HUMAN Zinc finger MYM-type protein 4 OS=Homo sapiens OX=9606 GN=ZMYM4 PE=1 SV=1	ND	0.84034	0.72993	ND	0.785135	0.0780717	-0.348987
1953	Q9NX24	18	NHP2_HUMAN H/ACA ribonucleoprotein complex subunit 2 OS=Homo sapiens OX=9606 GN=NHP2 PE=1 SV=1	1.02041	0.54945	ND	ND	0.78493	0.333019	-0.349364
1954	Q8IX01	417	SUGP2_HUMAN SURP and G-patch domain-containing protein 2 OS=Homo sapiens OX=9606 GN=SUGP2 PE=1 SV=2	ND	ND	0.80645	0.76336	0.784905	0.0304692	-0.34941
1955	Q01082	604	SPTB2_HUMAN Spectrin beta chain, non-erythrocytic 1 OS=Homo sapiens OX=9606 GN=SPTBN1 PE=1 SV=2	ND	0.78462	ND	ND	0.78462		-0.349934
1956	Q8IUC4	25	RHPN2_HUMAN Rhophilin-2 OS=Homo sapiens OX=9606 GN=RHPN2 PE=1 SV=1	0.88669	0.74835	0.79644	0.70582	0.784325	0.0776372	-0.350477
1957	P21333	2199	FLNA_HUMAN Filamin-A OS=Homo sapiens OX=9606 GN=FLNA PE=1 SV=4	0.77478	0.6993	ND	0.87719	0.783757	0.0892841	-0.351522
1958	Q06203	100	PUR1_HUMAN Amidophosphoribosyltransferase OS=Homo sapiens OX=9606 GN=PPAT PE=1 SV=1	0.8	0.76923	ND	0.78125	0.783493	0.0155072	-0.352007
1959	Q6UB35	198	C1TM_HUMAN Monofunctional C1-tetrahydrofolate synthase, mitochondrial OS=Homo sapiens OX=9606 GN=MTHFD1L PE=1 SV=1	ND	ND	0.92593	0.64103	0.78348	0.201455	-0.352032
1960	O75044	873	SRGP2_HUMAN SLIT-ROBO Rho GTPase-activating protein 2 OS=Homo sapiens OX=9606 GN=SRGAP2 PE=1 SV=3	0.64935	0.91743	ND	ND	0.78339	0.189561	-0.352197
1961	P49588	773	SYAC_HUMAN Alanine--tRNA ligase, cytoplasmic OS=Homo sapiens OX=9606 GN=AARS PE=1 SV=2	0.81301	0.78866	0.76752	0.76336	0.783137	0.0227883	-0.352662
1962	Q13286	4	CLN3_HUMAN Battenin OS=Homo sapiens OX=9606 GN=CLN3 PE=1 SV=1	ND	0.76336	0.8	ND	0.78168	0.0259084	-0.35535
1963	P05091	320	ALDH2_HUMAN Aldehyde dehydrogenase, mitochondrial OS=Homo sapiens OX=9606 GN=ALDH2 PE=1 SV=2	0.78125	ND	ND	ND	0.78125		-0.356144
1964	P14678	19	RSMB_HUMAN Small nuclear ribonucleoprotein-associated proteins B and B' OS=Homo sapiens OX=9606 GN=SNRPB PE=1 SV=2	ND	ND	0.78125	ND	0.78125		-0.356144
1965	P22692	174	IBP4_HUMAN Insulin-like growth factor-binding protein 4 OS=Homo sapiens OX=9606 GN=IGFBP4 PE=1 SV=2	0.78125	ND	ND	ND	0.78125		-0.356144	Disulfide bond	Ontology_term=ECO:0000269,ECO:0000269;evidence=ECO:0000269|PubMed:15642270,ECO:0000269|PubMed:16924115;Dbxref=PMID:15642270,PMID:16924115
1966	P27708	1374	PYR1_HUMAN CAD protein OS=Homo sapiens OX=9606 GN=CAD PE=1 SV=3	ND	0.78125	ND	ND	0.78125		-0.356144
1967	Q8NG27	241	PJA1_HUMAN E3 ubiquitin-protein ligase Praja-1 OS=Homo sapiens OX=9606 GN=PJA1 PE=1 SV=2	ND	ND	0.78125	ND	0.78125		-0.356144
1968	Q8WUY1	29	THEM6_HUMAN Protein THEM6 OS=Homo sapiens OX=9606 GN=THEM6 PE=1 SV=2	ND	0.78125	ND	ND	0.78125		-0.356144
1969	Q6N075	33	MFSD5_HUMAN Molybdate-anion transporter OS=Homo sapiens OX=9606 GN=MFSD5 PE=1 SV=2	0.82323	0.68027	0.89441	0.72491	0.780705	0.0965013	-0.357151
1970	Q7Z5J4	1729	RAI1_HUMAN Retinoic acid-induced protein 1 OS=Homo sapiens OX=9606 GN=RAI1 PE=1 SV=2	ND	ND	0.76923	0.7874	0.778315	0.0128481	-0.361574
1971	Q16576	97	RBBP7_HUMAN Histone-binding protein RBBP7 OS=Homo sapiens OX=9606 GN=RBBP7 PE=1 SV=1	0.68038	0.9009	0.78861	0.74074	0.777657	0.0933354	-0.362793
1972	Q5U5X0	97	LYRM7_HUMAN Complex III assembly factor LYRM7 OS=Homo sapiens OX=9606 GN=LYRM7 PE=1 SV=1	0.76923	0.8	0.76336	ND	0.77753	0.0196797	-0.36303
1973	Q8WXH0	2480	SYNE2_HUMAN Nesprin-2 OS=Homo sapiens OX=9606 GN=SYNE2 PE=1 SV=3	ND	0.76923	0.78125	ND	0.77524	0.00849942	-0.367285
1974	O15014	1290	ZN609_HUMAN Zinc finger protein 609 OS=Homo sapiens OX=9606 GN=ZNF609 PE=1 SV=2	ND	ND	0.77519	ND	0.77519		-0.367378
1975	P13639	567	EF2_HUMAN Elongation factor 2 OS=Homo sapiens OX=9606 GN=EEF2 PE=1 SV=4	ND	ND	0.77519	ND	0.77519		-0.367378
1976	P49189	288	AL9A1_HUMAN 4-trimethylaminobutyraldehyde dehydrogenase OS=Homo sapiens OX=9606 GN=ALDH9A1 PE=1 SV=3	ND	ND	0.77519	ND	0.77519		-0.367378	Active site	Note=Nucleophile;Ontology_term=ECO:0000255,ECO:0000255;evidence=ECO:0000255|PROSITE-ProRule:PRU10007,ECO:0000255|PROSITE-ProRule:PRU10008
1977	Q96DC7	14	TMCO6_HUMAN Transmembrane and coiled-coil domain-containing protein 6 OS=Homo sapiens OX=9606 GN=TMCO6 PE=1 SV=2	ND	ND	0.77519	ND	0.77519		-0.367378
1978	Q9BQS8	1110	FYCO1_HUMAN FYVE and coiled-coil domain-containing protein 1 OS=Homo sapiens OX=9606 GN=FYCO1 PE=1 SV=3	ND	ND	ND	0.77519	0.77519		-0.367378
1979	Q9H9A7	366	RMI1_HUMAN RecQ-mediated genome instability protein 1 OS=Homo sapiens OX=9606 GN=RMI1 PE=1 SV=3	ND	ND	ND	0.77519	0.77519		-0.367378
1980	A6QL63	87	BTBDB_HUMAN Ankyrin repeat and BTB/POZ domain-containing protein BTBD11 OS=Homo sapiens OX=9606 GN=BTBD11 PE=2 SV=3	ND	0.9009	ND	0.64935	0.775125	0.177873	-0.367499
1981	Q15464	224	SHB_HUMAN SH2 domain-containing adapter protein B OS=Homo sapiens OX=9606 GN=SHB PE=1 SV=2	ND	ND	0.36364	1.17647	0.770055	0.574758	-0.376967
1982	Q9H8P0	57	PORED_HUMAN Polyprenol reductase OS=Homo sapiens OX=9606 GN=SRD5A3 PE=1 SV=1	ND	0.74074	0.7874	0.78125	0.769797	0.025351	-0.377451
1983	Q9NQS1	251	AVEN_HUMAN Cell death regulator Aven OS=Homo sapiens OX=9606 GN=AVEN PE=1 SV=1	0.66667	0.73529	0.80645	0.86957	0.769495	0.0877945	-0.378016
1984	B2RCM3	82	B2RCM3_HUMAN cDNA, FLJ96158, highly similar to Homo sapiens calpain 2, (m/II) large subunit (CAPN2), mRNA OS=Homo sapiens OX=9606 PE=2 SV=1	ND	ND	0.76923	ND	0.76923		-0.378513
1985	P13489	75	RINI_HUMAN Ribonuclease inhibitor OS=Homo sapiens OX=9606 GN=RNH1 PE=1 SV=2	ND	0.76923	ND	ND	0.76923		-0.378513
1986	Q99614	149	TTC1_HUMAN Tetratricopeptide repeat protein 1 OS=Homo sapiens OX=9606 GN=TTC1 PE=1 SV=1	ND	0.76923	ND	ND	0.76923		-0.378513
1987	Q9C0C9	598	UBE2O_HUMAN (E3-independent) E2 ubiquitin-conjugating enzyme OS=Homo sapiens OX=9606 GN=UBE2O PE=1 SV=3	ND	0.76923	ND	ND	0.76923		-0.378513
1988	Q9ULD2	105	MTUS1_HUMAN Microtubule-associated tumor suppressor 1 OS=Homo sapiens OX=9606 GN=MTUS1 PE=1 SV=2	0.78125	ND	0.75481	ND	0.76803	0.0186959	-0.380765
1989	P25205	360	MCM3_HUMAN DNA replication licensing factor MCM3 OS=Homo sapiens OX=9606 GN=MCM3 PE=1 SV=3	0.84746	0.81301	0.65359	0.75758	0.76791	0.0847309	-0.380991
1990	Q9H8V3	221	ECT2_HUMAN Protein ECT2 OS=Homo sapiens OX=9606 GN=ECT2 PE=1 SV=4	ND	0.81301	0.70922	0.78125	0.767827	0.0531811	-0.381147
1991	Q5T9A4	515	ATD3B_HUMAN ATPase family AAA domain-containing protein 3B OS=Homo sapiens OX=9606 GN=ATAD3B PE=1 SV=1	0.72993	0.92639	0.70425	0.70926	0.767458	0.106536	-0.381841
1992	Q9P2T1	186	GMPR2_HUMAN GMP reductase 2 OS=Homo sapiens OX=9606 GN=GMPR2 PE=1 SV=1	0.7385	0.80388	0.80208	0.72403	0.767123	0.0418304	-0.382471	Active site&Metal binding&Mutagenesis	Note=Thioimidate intermediate;Ontology_term=ECO:0000255;evidence=ECO:0000255|HAMAP-Rule:MF_03195$Note=Potassium%3B via carbonyl oxygen;Ontology_term=ECO:0000255;evidence=ECO:0000255|HAMAP-Rule:MF_03195$Note=Loss of enzyme activity. C->A;Ontology_term=ECO:0000269,ECO:0000269;evidence=ECO:0000269|PubMed:16359702,ECO:0000269|PubMed:22037469;Dbxref=PMID:16359702,PMID:22037469
1993	Q06323	101	PSME1_HUMAN Proteasome activator complex subunit 1 OS=Homo sapiens OX=9606 GN=PSME1 PE=1 SV=1	0.73529	0.77636	0.75437	0.8	0.766505	0.0279325	-0.383633
1994	Q9UBT2	173	SAE2_HUMAN SUMO-activating enzyme subunit 2 OS=Homo sapiens OX=9606 GN=UBA2 PE=1 SV=2	0.75449	0.73275	0.74811	0.82664	0.765497	0.0417704	-0.38553	Active site&Mutagenesis	Note=Glycyl thioester intermediate;Ontology_term=ECO:0000255,ECO:0000269,ECO:0000269;evidence=ECO:0000255|PROSITE-ProRule:PRU10132,ECO:0000269|PubMed:15660128,ECO:0000269|PubMed:20164921;Dbxref=PMID:15660128,PMID:20164921$Note=Loss of enzyme activity. C->A;Ontology_term=ECO:0000269;evidence=ECO:0000269|PubMed:20164921;Dbxref=PMID:20164921
1995	P23588	457	IF4B_HUMAN Eukaryotic translation initiation factor 4B OS=Homo sapiens OX=9606 GN=EIF4B PE=1 SV=2	ND	ND	0.7651	ND	0.7651		-0.38628
1996	P18206	85	VINC_HUMAN Vinculin OS=Homo sapiens OX=9606 GN=VCL PE=1 SV=4	ND	0.71429	0.8547	0.72464	0.764543	0.0782493	-0.38733
1997	Q14008	1795	CKAP5_HUMAN Cytoskeleton-associated protein 5 OS=Homo sapiens OX=9606 GN=CKAP5 PE=1 SV=3	ND	ND	0.77519	0.75188	0.763535	0.0164827	-0.389234
1998	P68366	54	TBA4A_HUMAN Tubulin alpha-4A chain OS=Homo sapiens OX=9606 GN=TUBA4A PE=1 SV=1	ND	0.76336	ND	ND	0.76336		-0.389565
1999	Q14204	1999	DYHC1_HUMAN Cytoplasmic dynein 1 heavy chain 1 OS=Homo sapiens OX=9606 GN=DYNC1H1 PE=1 SV=5	ND	0.76336	ND	ND	0.76336		-0.389565
[truncated: 231 more rows]
