# Supplementary material for: Wittig reagents for chemoselective sulfenic acid ligation enables global site stoichiometry analysis and redox-controlled mitochondrial targeting
Source: Research Square preprint supplement (doi:10.21203/rs.3.rs-110280/v1), 2020-11-30
Supplement: Supplementary file 3 [file d69de236e2639354ac1de116.xlsx]

## Sheet: Legend
Supplementary Table 4. Proteome-wide analysis of cysteine sulfenic acid site stoichiometry in A549 cells. A549 cells were labeled with 13C5 WYneN at 37°C for 2 h. Cells were harvested and lysed as described in the METHODS. The same protein samples were then reduced with 10 mM TECP at room temperature (RT, 25°C) for 30 min to reduce reversible oxidations other than sulfenic acids and subsequently …

## Sheet: %SOH
Uniprot Accession #	Site	Gene name	Protein description	Modified sequences	Spectral count	All ratios	Ratio Ave.	Ratio SD	Total spectral count	Repeat counts	SOH stoichiometry	Functional annotation	Subcellular	Notes
Q9NRG9	118	AAAS	AAAS_HUMAN Aladin OS=Homo sapiens OX=9606 GN=AAAS PE=1 SV=1	TASGWALALC#R|TASGWALALC#R	3|3	0.65|0.16	0.405	0.34648	6	2	28.8256		SUBCELLULAR LOCATION: Nucleus, nuclear pore complex {ECO:0000269|PubMed:19782045}. Cytoplasm, cytoskeleton, spindle pole {ECO:0000269|PubMed:26246606}. Nucleus envelope {ECO:0000269|PubMed:27754849}. Note=In metaphase cells localizes within the spindle with some accumulation around spindle poles, with the highest concentration between the centrosome and metaphase plate (PubMed:26246606). The loca…
Q9NRG9	80	AAAS	AAAS_HUMAN Aladin OS=Homo sapiens OX=9606 GN=AAAS PE=1 SV=1	C#INIWR|C#INIWR	2|1	0.56|0.05	0.305	0.36062	3	2	23.3716		SUBCELLULAR LOCATION: Nucleus, nuclear pore complex {ECO:0000269|PubMed:19782045}. Cytoplasm, cytoskeleton, spindle pole {ECO:0000269|PubMed:26246606}. Nucleus envelope {ECO:0000269|PubMed:27754849}. Note=In metaphase cells localizes within the spindle with some accumulation around spindle poles, with the highest concentration between the centrosome and metaphase plate (PubMed:26246606). The loca…
Q86V21	525	AACS	AACS_HUMAN Acetoacetyl-CoA synthetase OS=Homo sapiens OX=9606 GN=AACS PE=1 SV=1	|FPGIWAHGDYC#R	|1	|0.05	0.05	NA	1	1	4.7619		SUBCELLULAR LOCATION: Cytoplasm, cytosol {ECO:0000250}.
Q6PD74	203	AAGAB	AAGAB_HUMAN Alpha- and gamma-adaptin-binding protein p34 OS=Homo sapiens OX=9606 GN=AAGAB PE=1 SV=1	NQGFSLLNSLTGTNHSIGSADPC#HPEQPHLPAADSTESLSDHR|NQGFSLLNSLTGTNHSIGSADPC#HPEQPHLPAADSTESLSDHR	1|2	0.47|0.57	0.52	0.07071	3	2	34.2105		SUBCELLULAR LOCATION: Cytoplasm, cytosol {ECO:0000269|PubMed:23000146, ECO:0000269|PubMed:23064416}.
Q6PD74	131	AAGAB	AAGAB_HUMAN Alpha- and gamma-adaptin-binding protein p34 OS=Homo sapiens OX=9606 GN=AAGAB PE=1 SV=1	AQEWC#IK|AQEWC#IK	2|1	0.155|0.07	0.1125	0.0601	3	2	10.1124		SUBCELLULAR LOCATION: Cytoplasm, cytosol {ECO:0000269|PubMed:23000146, ECO:0000269|PubMed:23064416}.
Q2M2I8	87	AAK1	AAK1_HUMAN AP2-associated protein kinase 1 OS=Homo sapiens OX=9606 GN=AAK1 PE=1 SV=3	MFVNNEHDLQVC#K|MFVNNEHDLQVC#K	3|3	0.19|0.82	0.505	0.44548	6	2	33.5548		SUBCELLULAR LOCATION: Cell membrane {ECO:0000250|UniProtKB:F1MH24}; Peripheral membrane protein {ECO:0000250|UniProtKB:F1MH24}. Membrane, clathrin-coated pit {ECO:0000250|UniProtKB:P0C1X8}. Cell junction, synapse, presynapse {ECO:0000250|UniProtKB:P0C1X8}. Note=Active when found in clathrin-coated pits at the plasma membrane. In neuronal cells, enriched at presynaptic terminals. In non-neuronal c…
Q2M2I8	288	AAK1	AAK1_HUMAN AP2-associated protein kinase 1 OS=Homo sapiens OX=9606 GN=AAK1 PE=1 SV=3	YSQDMHC#LIR|YSQDMHC#LIR	2|1	0.11|0.3	0.205	0.13435	3	2	17.0124		SUBCELLULAR LOCATION: Cell membrane {ECO:0000250|UniProtKB:F1MH24}; Peripheral membrane protein {ECO:0000250|UniProtKB:F1MH24}. Membrane, clathrin-coated pit {ECO:0000250|UniProtKB:P0C1X8}. Cell junction, synapse, presynapse {ECO:0000250|UniProtKB:P0C1X8}. Note=Active when found in clathrin-coated pits at the plasma membrane. In neuronal cells, enriched at presynaptic terminals. In non-neuronal c…
Q2M2I8	193	AAK1	AAK1_HUMAN AP2-associated protein kinase 1 OS=Homo sapiens OX=9606 GN=AAK1 PE=1 SV=3	GHYVLC#DFGSATNK|GHYVLC#DFGSATNK	4|2	0.06|0.045	0.0525	0.01061	6	2	4.98812		SUBCELLULAR LOCATION: Cell membrane {ECO:0000250|UniProtKB:F1MH24}; Peripheral membrane protein {ECO:0000250|UniProtKB:F1MH24}. Membrane, clathrin-coated pit {ECO:0000250|UniProtKB:P0C1X8}. Cell junction, synapse, presynapse {ECO:0000250|UniProtKB:P0C1X8}. Note=Active when found in clathrin-coated pits at the plasma membrane. In neuronal cells, enriched at presynaptic terminals. In non-neuronal c…
Q13685	130	AAMP	AAMP_HUMAN Angio-associated migratory cell protein OS=Homo sapiens OX=9606 GN=AAMP PE=1 SV=2	LSDGELLFEC#AGHK|LSDGELLFEC#AGHK	2|3	0.06049|0.02	0.04025	0.02863	5	2	3.86926		SUBCELLULAR LOCATION: Cell membrane. Cytoplasm.
Q9Y312	282	AAR2	AAR2_HUMAN Protein AAR2 homolog OS=Homo sapiens OX=9606 GN=AAR2 PE=1 SV=2	|LLNLLC#R	|1	|0.00098	0.00098	NA	1	1	0
P49588	723	AARS	SYAC_HUMAN Alanine--tRNA ligase, cytoplasmic OS=Homo sapiens OX=9606 GN=AARS PE=1 SV=2	VVSIGVPVSELLDDPSGPAGSLTSVEFC#GGTHLR|VVSIGVPVSELLDDPSGPAGSLTSVEFC#GGTHLR	1|1	0.29|0.17	0.23	0.08485	2	2	18.6992	Metal binding$Mutagenesis	SUBCELLULAR LOCATION: Cytoplasm {ECO:0000255|HAMAP-Rule:MF_03133, ECO:0000269|PubMed:27911835}.	Note=Zinc;Ontology_term=ECO:0000255;evidence=ECO:0000255|HAMAP-Rule:MF_03133$Note=Decreases editing activity. C->A;Ontology_term=ECO:0000269;evidence=ECO:0000269|PubMed:28493438;Dbxref=PMID:28493438
P49588	773	AARS	SYAC_HUMAN Alanine--tRNA ligase, cytoplasmic OS=Homo sapiens OX=9606 GN=AARS PE=1 SV=2	C#LSVMEAK|C#LSVMEAK	1|1	0.13|0.95	0.54	0.57983	2	2	35.0649		SUBCELLULAR LOCATION: Cytoplasm {ECO:0000255|HAMAP-Rule:MF_03133, ECO:0000269|PubMed:27911835}.
P49588	671	AARS	SYAC_HUMAN Alanine--tRNA ligase, cytoplasmic OS=Homo sapiens OX=9606 GN=AARS PE=1 SV=2	AVYTQDC#PLAAAK|AVYTQDC#PLAAAK	2|3	0.385|0.52	0.4525	0.09546	5	2	31.1532		SUBCELLULAR LOCATION: Cytoplasm {ECO:0000255|HAMAP-Rule:MF_03133, ECO:0000269|PubMed:27911835}.
P49588	525	AARS	SYAC_HUMAN Alanine--tRNA ligase, cytoplasmic OS=Homo sapiens OX=9606 GN=AARS PE=1 SV=2	MFVEEVSTGQEC#GVVLDK|MFVEEVSTGQEC#GVVLDK	1|1	0.00098|0.1	0.05049	0.07002	2	2	4.80633		SUBCELLULAR LOCATION: Cytoplasm {ECO:0000255|HAMAP-Rule:MF_03133, ECO:0000269|PubMed:27911835}.
P49588	533	AARS	SYAC_HUMAN Alanine--tRNA ligase, cytoplasmic OS=Homo sapiens OX=9606 GN=AARS PE=1 SV=2	TC#FYAEQGGQIYDEGYLVK|TC#FYAEQGGQIYDEGYLVK	1|1	0.00098|0.00098	0.00098	0	2	2	0		SUBCELLULAR LOCATION: Cytoplasm {ECO:0000255|HAMAP-Rule:MF_03133, ECO:0000269|PubMed:27911835}.
Q9NRN7	23	AASDHPPT	ADPPT_HUMAN L-aminoadipate-semialdehyde dehydrogenase-phosphopantetheinyl transferase OS=Homo sapiens OX=9606 GN=AASDHPPT PE=1 SV=2	WAFSC#GTWLPSR|	1|	2.89|	2.89	NA	1	1	74.2931		SUBCELLULAR LOCATION: Cytoplasm {ECO:0000269|PubMed:12815048}.
Q99758	1023	ABCA3	ABCA3_HUMAN ATP-binding cassette sub-family A member 3 OS=Homo sapiens OX=9606 GN=ABCA3 PE=1 SV=2	C#LVAASFR|	1|	0.62|	0.62	NA	1	1	38.2716		SUBCELLULAR LOCATION: Membrane {ECO:0000305}; Multi-pass membrane protein {ECO:0000305}.
P33527	1423	ABCC1	MRP1_HUMAN Multidrug resistance-associated protein 1 OS=Homo sapiens OX=9606 GN=ABCC1 PE=1 SV=3	LDHEC#AEGGENLSVGQR DFVSALPDKLDHEC#AEGGENLSVGQR|LDHEC#AEGGENLSVGQR DFVSALPDKLDHEC#AEGGENLSVGQR	6|4	0.49|0.7	0.595	0.14849	10	2	37.3041		SUBCELLULAR LOCATION: Cell membrane {ECO:0000269|PubMed:16230346}; Multi-pass membrane protein {ECO:0000255|PROSITE-ProRule:PRU00441, ECO:0000269|PubMed:16230346}.
P33527	1479	ABCC1	MRP1_HUMAN Multidrug resistance-associated protein 1 OS=Homo sapiens OX=9606 GN=ABCC1 PE=1 SV=3	TQFEDC#TVLTIAHR|TQFEDC#TVLTIAHR	3|6	0.14|0.145	0.1425	0.00354	9	2	12.4726		SUBCELLULAR LOCATION: Cell membrane {ECO:0000269|PubMed:16230346}; Multi-pass membrane protein {ECO:0000255|PROSITE-ProRule:PRU00441, ECO:0000269|PubMed:16230346}.
P33527	208	ABCC1	MRP1_HUMAN Multidrug resistance-associated protein 1 OS=Homo sapiens OX=9606 GN=ABCC1 PE=1 SV=3	SPLFSETIHDPNPC#PESSASFLSR|SPLFSETIHDPNPC#PESSASFLSR	2|2	0.04549|0.235	0.14025	0.134	4	2	12.2999		SUBCELLULAR LOCATION: Cell membrane {ECO:0000269|PubMed:16230346}; Multi-pass membrane protein {ECO:0000255|PROSITE-ProRule:PRU00441, ECO:0000269|PubMed:16230346}.
P33527	744	ABCC1	MRP1_HUMAN Multidrug resistance-associated protein 1 OS=Homo sapiens OX=9606 GN=ABCC1 PE=1 SV=3	SVIQAC#ALLPDLEILPSGDRTEIGEK|SVIQAC#ALLPDLEILPSGDRTEIGEK	3|4	0.09|0.11	0.1	0.01414	7	2	9.09091		SUBCELLULAR LOCATION: Cell membrane {ECO:0000269|PubMed:16230346}; Multi-pass membrane protein {ECO:0000255|PROSITE-ProRule:PRU00441, ECO:0000269|PubMed:16230346}.
P33527	1047	ABCC1	MRP1_HUMAN Multidrug resistance-associated protein 1 OS=Homo sapiens OX=9606 GN=ABCC1 PE=1 SV=3	C#LHVDLLHSILR|C#LHVDLLHSILR	4|4	0.00549|0.00549	0.00549	0	8	2	0.546002		SUBCELLULAR LOCATION: Cell membrane {ECO:0000269|PubMed:16230346}; Multi-pass membrane protein {ECO:0000255|PROSITE-ProRule:PRU00441, ECO:0000269|PubMed:16230346}.
P33527	730	ABCC1	MRP1_HUMAN Multidrug resistance-associated protein 1 OS=Homo sapiens OX=9606 GN=ABCC1 PE=1 SV=3	ENILFGC#QLEEPYYR|ENILFGC#QLEEPYYR	1|1	0.00098|0.00098	0.00098	0	2	2	0		SUBCELLULAR LOCATION: Cell membrane {ECO:0000269|PubMed:16230346}; Multi-pass membrane protein {ECO:0000255|PROSITE-ProRule:PRU00441, ECO:0000269|PubMed:16230346}.
Q96J66	348	ABCC11	ABCCB_HUMAN ATP-binding cassette sub-family C member 11 OS=Homo sapiens OX=9606 GN=ABCC11 PE=1 SV=1	VITC#LK|	1|	0.00098|	0.00098	NA	1	1	0		SUBCELLULAR LOCATION: Cell membrane {ECO:0000269|PubMed:19383836, ECO:0000269|PubMed:25896536}; Multi-pass membrane protein {ECO:0000255}. Vacuole membrane {ECO:0000269|PubMed:19383836}. Cytoplasmic vesicle membrane {ECO:0000269|PubMed:25896536}.
Q92887	1346	ABCC2	MRP2_HUMAN Canalicular multispecific organic anion transporter 1 OS=Homo sapiens OX=9606 GN=ABCC2 PE=1 SV=3	SSLTNC#LFR|SSLTNC#LFR	3|2	0.16|0.17	0.165	0.00707	5	2	14.1631		SUBCELLULAR LOCATION: Apical cell membrane {ECO:0000269|PubMed:11093739}; Multi-pass membrane protein {ECO:0000255|PROSITE-ProRule:PRU00441, ECO:0000269|PubMed:11093739}.
Q92887	1446	ABCC2	MRP2_HUMAN Canalicular multispecific organic anion transporter 1 OS=Homo sapiens OX=9606 GN=ABCC2 PE=1 SV=3	QLLC#LGR|QLLC#LGR	3|3	0.00858|0.00772	0.00815	0.00061	6	2	0.808411		SUBCELLULAR LOCATION: Apical cell membrane {ECO:0000269|PubMed:11093739}; Multi-pass membrane protein {ECO:0000255|PROSITE-ProRule:PRU00441, ECO:0000269|PubMed:11093739}.
O15438	1335	ABCC3	MRP3_HUMAN Canalicular multispecific organic anion transporter 2 OS=Homo sapiens OX=9606 GN=ABCC3 PE=1 SV=3	|SSMTLC#LFR	|2	|0.83	0.83	NA	2	1	45.3552		SUBCELLULAR LOCATION: Membrane; Multi-pass membrane protein.
O15438	665	ABCC3	MRP3_HUMAN Canalicular multispecific organic anion transporter 2 OS=Homo sapiens OX=9606 GN=ABCC3 PE=1 SV=3	GALVAVVGPVGC#GK|GALVAVVGPVGC#GK	3|2	0.73|0.52	0.625	0.14849	5	2	38.4615		SUBCELLULAR LOCATION: Membrane; Multi-pass membrane protein.
O15438	1185	ABCC3	MRP3_HUMAN Canalicular multispecific organic anion transporter 2 OS=Homo sapiens OX=9606 GN=ABCC3 PE=1 SV=3	SC#YPYIISNR|SC#YPYIISNR	1|1	0.89|0.19	0.54	0.49497	2	2	35.0649		SUBCELLULAR LOCATION: Membrane; Multi-pass membrane protein.
O15438	1475	ABCC3	MRP3_HUMAN Canalicular multispecific organic anion transporter 2 OS=Homo sapiens OX=9606 GN=ABCC3 PE=1 SV=3	TQFDTC#TVLTIAHR|	1|	0.28|	0.28	NA	1	1	21.875		SUBCELLULAR LOCATION: Membrane; Multi-pass membrane protein.
O15438	1071	ABCC3	MRP3_HUMAN Canalicular multispecific organic anion transporter 2 OS=Homo sapiens OX=9606 GN=ABCC3 PE=1 SV=3	ILNC#FSK|ILNC#FSK	1|1	0.24|0.02	0.13	0.15556	2	2	11.5044		SUBCELLULAR LOCATION: Membrane; Multi-pass membrane protein.
P61221	201	ABCE1	ABCE1_HUMAN ATP-binding cassette sub-family E member 1 OS=Homo sapiens OX=9606 GN=ABCE1 PE=1 SV=1	TQAIVC#QQLDLTHLK|TQAIVC#QQLDLTHLK	4|2	0.465|0.225	0.345	0.16971	6	2	25.6506		SUBCELLULAR LOCATION: Cytoplasm {ECO:0000269|PubMed:11585831}. Mitochondrion {ECO:0000269|PubMed:11585831}. Note=Localized to clusters of virus formation at the plasma membrane.
P61221	88	ABCE1	ABCE1_HUMAN ATP-binding cassette sub-family E member 1 OS=Homo sapiens OX=9606 GN=ABCE1 PE=1 SV=1	YC#ANAFK|YC#ANAFK	1|1	0.2|0.43	0.315	0.16263	2	2	23.9544		SUBCELLULAR LOCATION: Cytoplasm {ECO:0000269|PubMed:11585831}. Mitochondrion {ECO:0000269|PubMed:11585831}. Note=Localized to clusters of virus formation at the plasma membrane.
P61221	65	ABCE1	ABCE1_HUMAN ATP-binding cassette sub-family E member 1 OS=Homo sapiens OX=9606 GN=ABCE1 PE=1 SV=1	C#PFGALSIVNLPSNLEK|C#PFGALSIVNLPSNLEK	2|2	0.06549|0.08	0.07275	0.01026	4	2	6.78164		SUBCELLULAR LOCATION: Cytoplasm {ECO:0000269|PubMed:11585831}. Mitochondrion {ECO:0000269|PubMed:11585831}. Note=Localized to clusters of virus formation at the plasma membrane.
P61221	475	ABCE1	ABCE1_HUMAN ATP-binding cassette sub-family E member 1 OS=Homo sapiens OX=9606 GN=ABCE1 PE=1 SV=1	VALALC#LGK|VALALC#LGK	1|2	0.00098|0.00098	0.00098	0	3	2	0		SUBCELLULAR LOCATION: Cytoplasm {ECO:0000269|PubMed:11585831}. Mitochondrion {ECO:0000269|PubMed:11585831}. Note=Localized to clusters of virus formation at the plasma membrane.
Q8NE71	758	ABCF1	ABCF1_HUMAN ATP-binding cassette sub-family F member 1 OS=Homo sapiens OX=9606 GN=ABCF1 PE=1 SV=2	VVFAELAC#R|VVFAELAC#R	4|4	2.09|1.045	1.5675	0.73893	8	2	61.0516		SUBCELLULAR LOCATION: [Isoform 2]: Cytoplasm {ECO:0000269|PubMed:19570978}. Nucleus, nucleoplasm {ECO:0000269|PubMed:19570978}. Nucleus envelope {ECO:0000269|PubMed:19570978}.
Q8NE71	515	ABCF1	ABCF1_HUMAN ATP-binding cassette sub-family F member 1 OS=Homo sapiens OX=9606 GN=ABCF1 PE=1 SV=2	TLLIVSHDQGFLDDVC#TDIIHLDAQR|TLLIVSHDQGFLDDVC#TDIIHLDAQR	2|2	0.47|0.27	0.37	0.14142	4	2	27.0073		SUBCELLULAR LOCATION: [Isoform 2]: Cytoplasm {ECO:0000269|PubMed:19570978}. Nucleus, nucleoplasm {ECO:0000269|PubMed:19570978}. Nucleus envelope {ECO:0000269|PubMed:19570978}.
Q8NE71	655	ABCF1	ABCF1_HUMAN ATP-binding cassette sub-family F member 1 OS=Homo sapiens OX=9606 GN=ABCF1 PE=1 SV=2	IC#IVGPNGVGK|IC#IVGPNGVGK	1|1	0.00098|0.05	0.02549	0.03466	2	2	2.48564		SUBCELLULAR LOCATION: [Isoform 2]: Cytoplasm {ECO:0000269|PubMed:19570978}. Nucleus, nucleoplasm {ECO:0000269|PubMed:19570978}. Nucleus envelope {ECO:0000269|PubMed:19570978}.
Q9UG63	586	ABCF2	ABCF2_HUMAN ATP-binding cassette sub-family F member 2 OS=Homo sapiens OX=9606 GN=ABCF2 PE=1 SV=2	|LIQQVAQEIWVC#EK	|2	|2.39	2.39	NA	2	1	70.5015
Q9UG63	388	ABCF2	ABCF2_HUMAN ATP-binding cassette sub-family F member 2 OS=Homo sapiens OX=9606 GN=ABCF2 PE=1 SV=2	TLSFYFPPC#GK|TLSFYFPPC#GK	3|2	0.24|2.39	1.315	1.52028	5	2	56.8035
Q9UG63	161	ABCF2	ABCF2_HUMAN ATP-binding cassette sub-family F member 2 OS=Homo sapiens OX=9606 GN=ABCF2 PE=1 SV=2	TPLHC#VMEVDTER|TPLHC#VMEVDTER	6|10	0.22|0.15	0.185	0.0495	16	2	15.6118
Q9UNQ0	374	ABCG2	ABCG2_HUMAN ATP-binding cassette sub-family G member 2 OS=Homo sapiens OX=9606 GN=ABCG2 PE=1 SV=3	EISYTTSFC#HQLR|	1|	0.55|	0.55	NA	1	1	35.4839		SUBCELLULAR LOCATION: Cell membrane {ECO:0000269|PubMed:15001581, ECO:0000269|PubMed:15769853, ECO:0000269|PubMed:15807535, ECO:0000269|PubMed:18056989, ECO:0000269|PubMed:31003562, ECO:0000269|PubMed:31254042}; Multi-pass membrane protein {ECO:0000255}. Apical cell membrane {ECO:0000269|PubMed:19506252}; Multi-pass membrane protein {ECO:0000255}. Mitochondrion membrane {ECO:0000269|PubMed:231891…
Q9UNQ0	43	ABCG2	ABCG2_HUMAN ATP-binding cassette sub-family G member 2 OS=Homo sapiens OX=9606 GN=ABCG2 PE=1 SV=3	AFTEGAVLSFHNIC#YR|AFTEGAVLSFHNIC#YR	4|4	0.02049|0.37049	0.19549	0.24749	8	2	16.3523		SUBCELLULAR LOCATION: Cell membrane {ECO:0000269|PubMed:15001581, ECO:0000269|PubMed:15769853, ECO:0000269|PubMed:15807535, ECO:0000269|PubMed:18056989, ECO:0000269|PubMed:31003562, ECO:0000269|PubMed:31254042}; Multi-pass membrane protein {ECO:0000255}. Apical cell membrane {ECO:0000269|PubMed:19506252}; Multi-pass membrane protein {ECO:0000255}. Mitochondrion membrane {ECO:0000269|PubMed:231891…
Q9NUJ1	100	ABHD10	ABHDA_HUMAN Mycophenolic acid acyl-glucuronide esterase, mitochondrial OS=Homo sapiens OX=9606 GN=ABHD10 PE=1 SV=1	|ALAIEEFC#K	|3	|0.59	0.59	NA	3	1	37.1069		SUBCELLULAR LOCATION: Mitochondrion {ECO:0000305}.
Q9NUJ1	107	ABHD10	ABHDA_HUMAN Mycophenolic acid acyl-glucuronide esterase, mitochondrial OS=Homo sapiens OX=9606 GN=ABHD10 PE=1 SV=1	SLGHAC#IR|SLGHAC#IR	1|1	0.64|0.47	0.555	0.12021	2	2	35.6913		SUBCELLULAR LOCATION: Mitochondrion {ECO:0000305}.
Q8N2K0	323	ABHD12	ABD12_HUMAN Lysophosphatidylserine lipase ABHD12 OS=Homo sapiens OX=9606 GN=ABHD12 PE=1 SV=2	HISC#PLLILHAEDDPVVPFQLGR|HISC#PLLILHAEDDPVVPFQLGR	3|6	0.38|0.25	0.315	0.09192	9	2	23.9544		SUBCELLULAR LOCATION: Endoplasmic reticulum membrane {ECO:0000269|PubMed:30237167}; Single-pass membrane protein {ECO:0000255}.
O95870	416	ABHD16A	ABHGA_HUMAN Phosphatidylserine lipase ABHD16A OS=Homo sapiens OX=9606 GN=ABHD16A PE=1 SV=3	QHLNLNNAEQLC#R|QHLNLNNAEQLC#R	4|1	0.07049|0.00098	0.03573	0.04915	5	2	3.44974		SUBCELLULAR LOCATION: Membrane {ECO:0000250|UniProtKB:Q9Z1Q2}; Multi-pass membrane protein {ECO:0000255}.
Q5VST6	68	ABHD17B	AB17B_HUMAN Alpha/beta hydrolase domain-containing protein 17B OS=Homo sapiens OX=9606 GN=ABHD17B PE=1 SV=1	EKDAIEC#FMTR|EKDAIEC#FMTR	3|2	0.11|0.135	0.1225	0.01768	5	2	10.9131		SUBCELLULAR LOCATION: Cell membrane {ECO:0000250|UniProtKB:Q7M759}; Lipid-anchor {ECO:0000250|UniProtKB:Q7M759}; Cytoplasmic side {ECO:0000250|UniProtKB:Q7M759}. Recycling endosome membrane {ECO:0000250|UniProtKB:Q7M759}; Lipid-anchor {ECO:0000250|UniProtKB:Q7M759}; Cytoplasmic side {ECO:0000250|UniProtKB:Q7M759}. Cell projection, dendritic spine {ECO:0000250|UniProtKB:Q7M759}. Cell junction, syn…
Q5VST6	120	ABHD17B	AB17B_HUMAN Alpha/beta hydrolase domain-containing protein 17B OS=Homo sapiens OX=9606 GN=ABHD17B PE=1 SV=1	|INC#NIFSYDYSGYGASSGKPTEK	|1	|0.11	0.11	NA	1	1	9.90991		SUBCELLULAR LOCATION: Cell membrane {ECO:0000250|UniProtKB:Q7M759}; Lipid-anchor {ECO:0000250|UniProtKB:Q7M759}; Cytoplasmic side {ECO:0000250|UniProtKB:Q7M759}. Recycling endosome membrane {ECO:0000250|UniProtKB:Q7M759}; Lipid-anchor {ECO:0000250|UniProtKB:Q7M759}; Cytoplasmic side {ECO:0000250|UniProtKB:Q7M759}. Cell projection, dendritic spine {ECO:0000250|UniProtKB:Q7M759}. Cell junction, syn…
Q5VST6	81	ABHD17B	AB17B_HUMAN Alpha/beta hydrolase domain-containing protein 17B OS=Homo sapiens OX=9606 GN=ABHD17B PE=1 SV=1	IAC#MFVR|	2|	0.1|	0.1	NA	2	1	9.09091		SUBCELLULAR LOCATION: Cell membrane {ECO:0000250|UniProtKB:Q7M759}; Lipid-anchor {ECO:0000250|UniProtKB:Q7M759}; Cytoplasmic side {ECO:0000250|UniProtKB:Q7M759}. Recycling endosome membrane {ECO:0000250|UniProtKB:Q7M759}; Lipid-anchor {ECO:0000250|UniProtKB:Q7M759}; Cytoplasmic side {ECO:0000250|UniProtKB:Q7M759}. Cell projection, dendritic spine {ECO:0000250|UniProtKB:Q7M759}. Cell junction, syn…
Q9BV23	134	ABHD6	ABHD6_HUMAN Monoacylglycerol lipase ABHD6 OS=Homo sapiens OX=9606 GN=ABHD6 PE=1 SV=1	IHQFVEC#LK|	1|	0.12|	0.12	NA	1	1	10.7143		SUBCELLULAR LOCATION: Late endosome membrane {ECO:0000250|UniProtKB:Q8R2Y0}; Single-pass type II membrane protein {ECO:0000255}. Lysosome membrane {ECO:0000250|UniProtKB:Q8R2Y0}; Single-pass type II membrane protein {ECO:0000255}. Mitochondrion membrane {ECO:0000250|UniProtKB:Q8R2Y0}; Single-pass type II membrane protein {ECO:0000255}.
Q8IZP0	33	ABI1	ABI1_HUMAN Abl interactor 1 OS=Homo sapiens OX=9606 GN=ABI1 PE=1 SV=4	VADYC#ENNYIQATDKR|VADYC#ENNYIQATDKR	2|2	0.48549|0.54	0.51275	0.03854	4	2	33.8952		SUBCELLULAR LOCATION: Cytoplasm {ECO:0000250}. Nucleus {ECO:0000250}. Cell projection, lamellipodium {ECO:0000250}. Cell projection, filopodium {ECO:0000250}. Cell projection, growth cone {ECO:0000250}. Cell junction, synapse, postsynaptic density {ECO:0000250}. Cytoplasm, cytoskeleton {ECO:0000250}. Note=Localized to protruding lamellipodia and filopodia tips. Also localized to neuronal growth c…
Q8IZP0	488	ABI1	ABI1_HUMAN Abl interactor 1 OS=Homo sapiens OX=9606 GN=ABI1 PE=1 SV=4	KNDDGWYEGVC#NR|KNDDGWYEGVC#NR	1|1	0.00098|0.00098	0.00098	0	2	2	0		SUBCELLULAR LOCATION: Cytoplasm {ECO:0000250}. Nucleus {ECO:0000250}. Cell projection, lamellipodium {ECO:0000250}. Cell projection, filopodium {ECO:0000250}. Cell projection, growth cone {ECO:0000250}. Cell junction, synapse, postsynaptic density {ECO:0000250}. Cytoplasm, cytoskeleton {ECO:0000250}. Note=Localized to protruding lamellipodia and filopodia tips. Also localized to neuronal growth c…
P00519	369	ABL1	ABL1_HUMAN Tyrosine-protein kinase ABL1 OS=Homo sapiens OX=9606 GN=ABL1 PE=1 SV=4	NC#LVGENHLVK|NC#LVGENHLVK	1|1	0.00098|0.00098	0.00098	0	2	2	0		SUBCELLULAR LOCATION: Cytoplasm, cytoskeleton. Nucleus. Mitochondrion {ECO:0000250}. Note=Shuttles between the nucleus and cytoplasm depending on environmental signals. Sequestered into the cytoplasm through interaction with 14-3-3 proteins. Localizes to mitochondria in response to oxidative stress (By similarity). {ECO:0000250}.; SUBCELLULAR LOCATION: [Isoform IB]: Nucleus membrane; Lipid-anchor…
Q12979	756	ABR	ABR_HUMAN Active breakpoint cluster region-related protein OS=Homo sapiens OX=9606 GN=ABR PE=1 SV=2	ENC#MMHLLR|ENC#MMHLLR	2|3	0.185|0.04	0.1125	0.10253	5	2	10.1124		SUBCELLULAR LOCATION: Cell projection, dendritic spine {ECO:0000250|UniProtKB:Q5SSL4}. Cell projection, axon {ECO:0000250|UniProtKB:Q5SSL4}. Cell junction, synapse {ECO:0000250|UniProtKB:A0A0G2JTR4}.
Q8N961	971	ABTB2	ABTB2_HUMAN Ankyrin repeat and BTB/POZ domain-containing protein 2 OS=Homo sapiens OX=9606 GN=ABTB2 PE=2 SV=2	|IHNAPELALFC#EGFFLK	|1	|0.03	0.03	NA	1	1	2.91262
P09110	123	ACAA1	THIK_HUMAN 3-ketoacyl-CoA thiolase, peroxisomal OS=Homo sapiens OX=9606 GN=ACAA1 PE=1 SV=2	QC#SSGLQAVASIAGGIR|QC#SSGLQAVASIAGGIR	1|2	0.69|0.43549	0.56274	0.17997	3	2	36.0098	Active site	SUBCELLULAR LOCATION: Peroxisome.	Note=Acyl-thioester intermediate;Ontology_term=ECO:0000250;evidence=ECO:0000250
P09110	381	ACAA1	THIK_HUMAN 3-ketoacyl-CoA thiolase, peroxisomal OS=Homo sapiens OX=9606 GN=ACAA1 PE=1 SV=2	VNPLGGAVALGHPLGC#TGAR|VNPLGGAVALGHPLGC#TGAR	3|3	2.01|2.05	2.03	0.02828	6	2	66.9967		SUBCELLULAR LOCATION: Peroxisome.
P09110	218	ACAA1	THIK_HUMAN 3-ketoacyl-CoA thiolase, peroxisomal OS=Homo sapiens OX=9606 GN=ACAA1 PE=1 SV=2	GC#FQAEIVPVTTTVHDDK|GC#FQAEIVPVTTTVHDDK	2|3	0.00098|0.06	0.03049	0.04173	5	2	2.95879		SUBCELLULAR LOCATION: Peroxisome.
P42765	179	ACAA2	THIM_HUMAN 3-ketoacyl-CoA thiolase, mitochondrial OS=Homo sapiens OX=9606 GN=ACAA2 PE=1 SV=2	EEC#DKYALQSQQR|EEC#DKYALQSQQR	1|2	0.00098|0.17549	0.08824	0.1234	3	2	8.10851		SUBCELLULAR LOCATION: Mitochondrion {ECO:0000269|PubMed:18371312}.
Q13085	407	ACACA	ACACA_HUMAN Acetyl-CoA carboxylase 1 OS=Homo sapiens OX=9606 GN=ACACA PE=1 SV=2	IIEEAPATIATPAVFEHMEQC#AVK|IIEEAPATIATPAVFEHMEQC#AVK	2|3	0.495|0.67	0.5825	0.12374	5	2	36.8088		SUBCELLULAR LOCATION: Cytoplasm, cytosol {ECO:0000250|UniProtKB:Q5SWU9}.
Q13085	500	ACACA	ACACA_HUMAN Acetyl-CoA carboxylase 1 OS=Homo sapiens OX=9606 GN=ACACA PE=1 SV=2	MMYGVSPWGDSPIDFEDSAHVPC#PR|MMYGVSPWGDSPIDFEDSAHVPC#PR	1|2	0.14|0.52	0.33	0.2687	3	2	24.812		SUBCELLULAR LOCATION: Cytoplasm, cytosol {ECO:0000250|UniProtKB:Q5SWU9}.
Q13085	1470	ACACA	ACACA_HUMAN Acetyl-CoA carboxylase 1 OS=Homo sapiens OX=9606 GN=ACACA PE=1 SV=2	TDC#NHIFLNFVPTVIMDPSK|	1|	0.25|	0.25	NA	1	1	20		SUBCELLULAR LOCATION: Cytoplasm, cytosol {ECO:0000250|UniProtKB:Q5SWU9}.
Q13085	1176	ACACA	ACACA_HUMAN Acetyl-CoA carboxylase 1 OS=Homo sapiens OX=9606 GN=ACACA PE=1 SV=2	|DNTC#VVEFQFMLPTSHPNR	|1	|0.23	0.23	NA	1	1	18.6992		SUBCELLULAR LOCATION: Cytoplasm, cytosol {ECO:0000250|UniProtKB:Q5SWU9}.
Q13085	634	ACACA	ACACA_HUMAN Acetyl-CoA carboxylase 1 OS=Homo sapiens OX=9606 GN=ACACA PE=1 SV=2	VQAERPDTMLGVVC#GALHVADVSLR|VQAERPDTMLGVVC#GALHVADVSLR	2|3	0.105|0.12	0.1125	0.01061	5	2	10.1124		SUBCELLULAR LOCATION: Cytoplasm, cytosol {ECO:0000250|UniProtKB:Q5SWU9}.
Q13085	813	ACACA	ACACA_HUMAN Acetyl-CoA carboxylase 1 OS=Homo sapiens OX=9606 GN=ACACA PE=1 SV=2	RPGAALDPGC#VLAK|RPGAALDPGC#VLAK	2|1	0.2|0.01	0.105	0.13435	3	2	9.50226		SUBCELLULAR LOCATION: Cytoplasm, cytosol {ECO:0000250|UniProtKB:Q5SWU9}.
Q13085	1769	ACACA	ACACA_HUMAN Acetyl-CoA carboxylase 1 OS=Homo sapiens OX=9606 GN=ACACA PE=1 SV=2	VSALNSVHC#EHVEDEGESR|VSALNSVHC#EHVEDEGESR	4|4	0.05|0.055	0.0525	0.00354	8	2	4.98812		SUBCELLULAR LOCATION: Cytoplasm, cytosol {ECO:0000250|UniProtKB:Q5SWU9}.
Q13085	1396	ACACA	ACACA_HUMAN Acetyl-CoA carboxylase 1 OS=Homo sapiens OX=9606 GN=ACACA PE=1 SV=2	NFDLTAIPC#ANHK|NFDLTAIPC#ANHK	3|2	0.05|0.01264	0.03132	0.02642	5	2	3.03688		SUBCELLULAR LOCATION: Cytoplasm, cytosol {ECO:0000250|UniProtKB:Q5SWU9}.
Q13085	1009	ACACA	ACACA_HUMAN Acetyl-CoA carboxylase 1 OS=Homo sapiens OX=9606 GN=ACACA PE=1 SV=2	C#VFALR|C#VFALR	1|1	0.03|0.02	0.025	0.00707	2	2	2.43902		SUBCELLULAR LOCATION: Cytoplasm, cytosol {ECO:0000250|UniProtKB:Q5SWU9}.
Q709F0	651	ACAD11	ACD11_HUMAN Acyl-CoA dehydrogenase family member 11 OS=Homo sapiens OX=9606 GN=ACAD11 PE=1 SV=3	|ALQIMC#ER	|1	|0.1	0.1	NA	1	1	9.09091		SUBCELLULAR LOCATION: Peroxisome {ECO:0000250|UniProtKB:Q80XL6}. Mitochondrion membrane {ECO:0000269|PubMed:21237683}. Note=Has been detected associated with mitochondrial membrane, but no matrix, in kidney and cerebellum, as well as in a neuroblastoma cell line, but not in skin fibroblasts, where it is observed in cytoplasmic vesicles (PubMed:21237683). No mitochondrial targeting signals could b…
Q9UKU7	217	ACAD8	ACAD8_HUMAN Isobutyryl-CoA dehydrogenase, mitochondrial OS=Homo sapiens OX=9606 GN=ACAD8 PE=1 SV=1	GISC#IVVEK|	3|	0.91|	0.91	NA	3	1	47.644		SUBCELLULAR LOCATION: Mitochondrion {ECO:0000269|PubMed:11013134, ECO:0000269|PubMed:12359132}.
Q9H845	179	ACAD9	ACAD9_HUMAN Complex I assembly factor ACAD9, mitochondrial OS=Homo sapiens OX=9606 GN=ACAD9 PE=1 SV=1	LASGEHIAAFC#LTEPASGSDAASIR|LASGEHIAAFC#LTEPASGSDAASIR	2|2	0.28549|0.25049	0.26799	0.02475	4	2	21.135		SUBCELLULAR LOCATION: Mitochondrion inner membrane {ECO:0000269|PubMed:16020546, ECO:0000269|PubMed:20816094}; Peripheral membrane protein {ECO:0000269|PubMed:16020546}; Matrix side {ECO:0000269|PubMed:16020546}. Note=Essentially associated with membranes. {ECO:0000269|PubMed:16020546}.
Q9H845	613	ACAD9	ACAD9_HUMAN Complex I assembly factor ACAD9, mitochondrial OS=Homo sapiens OX=9606 GN=ACAD9 PE=1 SV=1	AYIC#AHPLDR|AYIC#AHPLDR	1|3	0.00599|0.05	0.028	0.03112	4	2	2.72374		SUBCELLULAR LOCATION: Mitochondrion inner membrane {ECO:0000269|PubMed:16020546, ECO:0000269|PubMed:20816094}; Peripheral membrane protein {ECO:0000269|PubMed:16020546}; Matrix side {ECO:0000269|PubMed:16020546}. Note=Essentially associated with membranes. {ECO:0000269|PubMed:16020546}.
P45954	385	ACADSB	ACDSB_HUMAN Short/branched chain specific acyl-CoA dehydrogenase, mitochondrial OS=Homo sapiens OX=9606 GN=ACADSB PE=1 SV=1	C#IEWMGGVGYTK|C#IEWMGGVGYTK	1|1	0.21|0.29	0.25	0.05657	2	2	20		SUBCELLULAR LOCATION: Mitochondrion matrix.
P45954	261	ACADSB	ACDSB_HUMAN Short/branched chain specific acyl-CoA dehydrogenase, mitochondrial OS=Homo sapiens OX=9606 GN=ACADSB PE=1 SV=1	ASSTC#PLTFENVK|ASSTC#PLTFENVK	2|2	0.07|0.045	0.0575	0.01768	4	2	5.43735		SUBCELLULAR LOCATION: Mitochondrion matrix.
P49748	433	ACADVL	ACADV_HUMAN Very long-chain specific acyl-CoA dehydrogenase, mitochondrial OS=Homo sapiens OX=9606 GN=ACADVL PE=1 SV=1	VTDEC#IQIMGGMGFMK|VTDEC#IQIMGGMGFMK	3|4	0.15|0.405	0.2775	0.18031	7	2	21.7221		SUBCELLULAR LOCATION: Mitochondrion inner membrane.
P49748	477	ACADVL	ACADV_HUMAN Very long-chain specific acyl-CoA dehydrogenase, mitochondrial OS=Homo sapiens OX=9606 GN=ACADVL PE=1 SV=1	LFVALQGC#MDK|LFVALQGC#MDK	2|1	0.435|0.04	0.2375	0.27931	3	2	19.1919		SUBCELLULAR LOCATION: Mitochondrion inner membrane.
P49748	237	ACADVL	ACADV_HUMAN Very long-chain specific acyl-CoA dehydrogenase, mitochondrial OS=Homo sapiens OX=9606 GN=ACADVL PE=1 SV=1	TSAVPSPC#GK|TSAVPSPC#GK	1|1	30.68|3.2	16.94	19.4313	2	2	94.4259	Modified residue	SUBCELLULAR LOCATION: Mitochondrion inner membrane.	Note=S-nitrosocysteine;Ontology_term=ECO:0000250;evidence=ECO:0000250|UniProtKB:P50544
P24752	196	ACAT1	THIL_HUMAN Acetyl-CoA acetyltransferase, mitochondrial OS=Homo sapiens OX=9606 GN=ACAT1 PE=1 SV=1	IHMGSC#AENTAK|IHMGSC#AENTAK	2|3	0.335|0.2	0.2675	0.09546	5	2	21.1045		SUBCELLULAR LOCATION: Mitochondrion {ECO:0000269|PubMed:1979337}.
P24752	119	ACAT1	THIL_HUMAN Acetyl-CoA acetyltransferase, mitochondrial OS=Homo sapiens OX=9606 GN=ACAT1 PE=1 SV=1	QAVLGAGLPISTPC#TTINK|QAVLGAGLPISTPC#TTINK	2|2	0.06|0.00098	0.03049	0.04173	4	2	2.95879		SUBCELLULAR LOCATION: Mitochondrion {ECO:0000269|PubMed:1979337}.
Q9BWD1	65	ACAT2	THIC_HUMAN Acetyl-CoA acetyltransferase, cytosolic OS=Homo sapiens OX=9606 GN=ACAT2 PE=1 SV=2	VLAAGC#GQNPVR ATVAPEDVSEVIFGHVLAAGC#GQNPVR|GHVLAAGC#GQNPVR VLAAGC#GQNPVR ATVAPEDVSEVIFGHVLAAGC#GQNPVR	5|6	0.16|0.185	0.1725	0.01768	11	2	14.7122		SUBCELLULAR LOCATION: Cytoplasm, cytosol {ECO:0000305|PubMed:7911016}.
Q9BWD1	360	ACAT2	THIC_HUMAN Acetyl-CoA acetyltransferase, cytosolic OS=Homo sapiens OX=9606 GN=ACAT2 PE=1 SV=2	VNIEGGAIALGHPLGASGC#R|VNIEGGAIALGHPLGASGC#R	2|2	0.28|0.02049	0.15025	0.1835	4	2	13.0624		SUBCELLULAR LOCATION: Cytoplasm, cytosol {ECO:0000305|PubMed:7911016}.
Q9H3P7	487	ACBD3	GCP60_HUMAN Golgi resident protein GCP60 OS=Homo sapiens OX=9606 GN=ACBD3 PE=1 SV=4	RDC#HEEVYAGSHQYPGR DC#HEEVYAGSHQYPGR|RDC#HEEVYAGSHQYPGR DC#HEEVYAGSHQYPGR	12|13	0.00338|0.01	0.00669	0.00468	25	2	0.664554		SUBCELLULAR LOCATION: Golgi apparatus membrane {ECO:0000269|PubMed:22124328, ECO:0000269|PubMed:27009356, ECO:0000269|PubMed:30755512, ECO:0000269|PubMed:31381608}; Peripheral membrane protein {ECO:0000305|PubMed:31381608}; Cytoplasmic side {ECO:0000250}. Mitochondrion {ECO:0000250}. Note=Also mitochondrial (via its interaction with PBR). {ECO:0000250}.
Q9BR61	166	ACBD6	ACBD6_HUMAN Acyl-CoA-binding domain-containing protein 6 OS=Homo sapiens OX=9606 GN=ACBD6 PE=1 SV=1	|EEDKNIFDYC#R	|2	|0.44	0.44	NA	2	1	30.5556		SUBCELLULAR LOCATION: Cytoplasm {ECO:0000269|PubMed:18268358}.
Q9BR61	200	ACBD6	ACBD6_HUMAN Acyl-CoA-binding domain-containing protein 6 OS=Homo sapiens OX=9606 GN=ACBD6 PE=1 SV=1	ALLHWAC#DR|ALLHWAC#DR	2|1	0.145|0.07	0.1075	0.05303	3	2	9.70655		SUBCELLULAR LOCATION: Cytoplasm {ECO:0000269|PubMed:18268358}.
Q9UKV3	1052	ACIN1	ACINU_HUMAN Apoptotic chromatin condensation inducer in the nucleus OS=Homo sapiens OX=9606 GN=ACIN1 PE=1 SV=2	SHC#FVTYSTVEEAVATR|SHC#FVTYSTVEEAVATR	2|1	1.485|2.54	2.0125	0.746	3	2	66.805		SUBCELLULAR LOCATION: Nucleus. Nucleus speckle. Nucleus, nucleoplasm. Note=Phosphorylation on Ser-1180 by SRPK2 redistributes it from the nuclear speckles to the nucleoplasm.
Q9UKV3	733	ACIN1	ACINU_HUMAN Apoptotic chromatin condensation inducer in the nucleus OS=Homo sapiens OX=9606 GN=ACIN1 PE=1 SV=2	KC#EAEEAEPPAATQPQTSETQTSHLPESER|KC#EAEEAEPPAATQPQTSETQTSHLPESER	3|2	0.37|0.52	0.445	0.10607	5	2	30.7958		SUBCELLULAR LOCATION: Nucleus. Nucleus speckle. Nucleus, nucleoplasm. Note=Phosphorylation on Ser-1180 by SRPK2 redistributes it from the nuclear speckles to the nucleoplasm.
Q9UKV3	1083	ACIN1	ACINU_HUMAN Apoptotic chromatin condensation inducer in the nucleus OS=Homo sapiens OX=9606 GN=ACIN1 PE=1 SV=2	FLC#ADYAEQDELDYHR|FLC#ADYAEQDELDYHR	2|3	0.10049|0.00098	0.05073	0.07036	5	2	4.82807		SUBCELLULAR LOCATION: Nucleus. Nucleus speckle. Nucleus, nucleoplasm. Note=Phosphorylation on Ser-1180 by SRPK2 redistributes it from the nuclear speckles to the nucleoplasm.
P53396	519	ACLY	ACLY_HUMAN ATP-citrate synthase OS=Homo sapiens OX=9606 GN=ACLY PE=1 SV=3	AVQGMLDFDYVC#SR|AVQGMLDFDYVC#SR	2|4	0.115|0.13	0.1225	0.01061	6	2	10.9131		SUBCELLULAR LOCATION: Cytoplasm, cytosol {ECO:0000269|PubMed:9116495}.
P53396	229	ACLY	ACLY_HUMAN ATP-citrate synthase OS=Homo sapiens OX=9606 GN=ACLY PE=1 SV=3	VDATADYIC#K|VDATADYIC#K	1|1	0.13|0.01	0.07	0.08485	2	2	6.54206		SUBCELLULAR LOCATION: Cytoplasm, cytosol {ECO:0000269|PubMed:9116495}.
P53396	20	ACLY	ACLY_HUMAN ATP-citrate synthase OS=Homo sapiens OX=9606 GN=ACLY PE=1 SV=3	IC#TTSAIQNR FIC#TTSAIQNR|IC#TTSAIQNR FIC#TTSAIQNR	5|4	0.08|0.00659	0.0433	0.05191	9	2	4.15029		SUBCELLULAR LOCATION: Cytoplasm, cytosol {ECO:0000269|PubMed:9116495}.
P53396	1040	ACLY	ACLY_HUMAN ATP-citrate synthase OS=Homo sapiens OX=9606 GN=ACLY PE=1 SV=3	NC#GSFTR|NC#GSFTR	4|4	0.025|0.055	0.04	0.02121	8	2	3.84615		SUBCELLULAR LOCATION: Cytoplasm, cytosol {ECO:0000269|PubMed:9116495}.
P53396	633	ACLY	ACLY_HUMAN ATP-citrate synthase OS=Homo sapiens OX=9606 GN=ACLY PE=1 SV=3	GVTIIGPATVGGIKPGC#FK|GVTIIGPATVGGIKPGC#FK	8|8	0.035|0.04	0.0375	0.00354	16	2	3.61446		SUBCELLULAR LOCATION: Cytoplasm, cytosol {ECO:0000269|PubMed:9116495}.
P53396	845	ACLY	ACLY_HUMAN ATP-citrate synthase OS=Homo sapiens OX=9606 GN=ACLY PE=1 SV=3	KPASFMTSIC#DER|KPASFMTSIC#DER	13|18	0.01|0.02	0.015	0.00707	31	2	1.47783		SUBCELLULAR LOCATION: Cytoplasm, cytosol {ECO:0000269|PubMed:9116495}.
P21399	118	ACO1	ACOC_HUMAN Cytoplasmic aconitate hydratase OS=Homo sapiens OX=9606 GN=ACO1 PE=1 SV=3	INPVC#PADLVIDHSIQVDFNR|INPVC#PADLVIDHSIQVDFNR	3|3	0.05|0.04	0.045	0.00707	6	2	4.30622		SUBCELLULAR LOCATION: Cytoplasm.
Q99798	332	ACO2	ACON_HUMAN Aconitate hydratase, mitochondrial OS=Homo sapiens OX=9606 GN=ACO2 PE=1 SV=2	|DHLVPDPGC#HYDQLIEINLSELKPHINGPFTPDLAHPVAEVGK	|1	|0.37	0.37	NA	1	1	27.0073		SUBCELLULAR LOCATION: Mitochondrion {ECO:0000250|UniProtKB:P16276}.
Q99798	592	ACO2	ACON_HUMAN Aconitate hydratase, mitochondrial OS=Homo sapiens OX=9606 GN=ACO2 PE=1 SV=2	C#TTDHISAAGPWLK|C#TTDHISAAGPWLK	1|2	0.15|0.04549	0.09774	0.0739	3	2	8.90375		SUBCELLULAR LOCATION: Mitochondrion {ECO:0000250|UniProtKB:P16276}.
Q99798	126	ACO2	ACON_HUMAN Aconitate hydratase, mitochondrial OS=Homo sapiens OX=9606 GN=ACO2 PE=1 SV=2	VAVPSTIHC#DHLIEAQVGGEK|VAVPSTIHC#DHLIEAQVGGEK	2|4	0.03049|0.06	0.04525	0.02087	6	2	4.32911		SUBCELLULAR LOCATION: Mitochondrion {ECO:0000250|UniProtKB:P16276}.
Q9NPJ3	40	ACOT13	ACO13_HUMAN Acyl-coenzyme A thioesterase 13 OS=Homo sapiens OX=9606 GN=ACOT13 PE=1 SV=1	|VIC#EMK	|2	|0.03	0.03	NA	2	1	2.91262		SUBCELLULAR LOCATION: Cytoplasm, cytosol {ECO:0000250|UniProtKB:Q9CQR4}. Mitochondrion {ECO:0000250|UniProtKB:Q9CQR4}. Nucleus {ECO:0000250|UniProtKB:Q9CQR4}. Cytoplasm, cytoskeleton, spindle {ECO:0000250|UniProtKB:Q9CQR4}. Note=During interphase, found both in the nucleus and in the cytoplasm. At mitosis, localizes to the spindle. Colocalizes with tubulin. {ECO:0000250|UniProtKB:Q9CQR4}.
O00154	288	ACOT7	BACH_HUMAN Cytosolic acyl coenzyme A thioester hydrolase OS=Homo sapiens OX=9606 GN=ACOT7 PE=1 SV=3	GC#VITISGR|GC#VITISGR	2|1	0.4|0.05	0.225	0.24749	3	2	18.3673		SUBCELLULAR LOCATION: [Isoform 4]: Cytoplasm, cytosol {ECO:0000305|PubMed:12435388}.; SUBCELLULAR LOCATION: [Isoform 6]: Cytoplasm, cytosol {ECO:0000305|PubMed:12435388}.; SUBCELLULAR LOCATION: [Isoform 1]: Mitochondrion {ECO:0000269|PubMed:12435388}.; SUBCELLULAR LOCATION: [Isoform 5]: Mitochondrion {ECO:0000269|PubMed:12435388}.
O00154	100	ACOT7	BACH_HUMAN Cytosolic acyl coenzyme A thioester hydrolase OS=Homo sapiens OX=9606 GN=ACOT7 PE=1 SV=3	C#VAALAR|C#VAALAR	1|1	0.05|0.02	0.035	0.02121	2	2	3.38164		SUBCELLULAR LOCATION: [Isoform 4]: Cytoplasm, cytosol {ECO:0000305|PubMed:12435388}.; SUBCELLULAR LOCATION: [Isoform 6]: Cytoplasm, cytosol {ECO:0000305|PubMed:12435388}.; SUBCELLULAR LOCATION: [Isoform 1]: Mitochondrion {ECO:0000269|PubMed:12435388}.; SUBCELLULAR LOCATION: [Isoform 5]: Mitochondrion {ECO:0000269|PubMed:12435388}.
Q9Y305	128	ACOT9	ACOT9_HUMAN Acyl-coenzyme A thioesterase 9, mitochondrial OS=Homo sapiens OX=9606 GN=ACOT9 PE=1 SV=2	ILEDLDSLGVLIC#YMHNK|	1|	1.41|	1.41	NA	1	1	58.5062		SUBCELLULAR LOCATION: Mitochondrion {ECO:0000250}.
Q9Y305	299	ACOT9	ACOT9_HUMAN Acyl-coenzyme A thioesterase 9, mitochondrial OS=Homo sapiens OX=9606 GN=ACOT9 PE=1 SV=2	SLEIC#HPQER|SLEIC#HPQER	4|4	0.225|0.09	0.1575	0.09546	8	2	13.6069		SUBCELLULAR LOCATION: Mitochondrion {ECO:0000250}.
Q15067	392	ACOX1	ACOX1_HUMAN Peroxisomal acyl-coenzyme A oxidase 1 OS=Homo sapiens OX=9606 GN=ACOX1 PE=1 SV=3	|AFTSWTANTGIEAC#R	|1	|0.41	0.41	NA	1	1	29.078		SUBCELLULAR LOCATION: Peroxisome {ECO:0000250|UniProtKB:P07872}.
Q15067	199	ACOX1	ACOX1_HUMAN Peroxisomal acyl-coenzyme A oxidase 1 OS=Homo sapiens OX=9606 GN=ACOX1 PE=1 SV=3	C#YGLHAFIVPIR|C#YGLHAFIVPIR	2|1	0.03|0.2	0.115	0.12021	3	2	10.3139		SUBCELLULAR LOCATION: Peroxisome {ECO:0000250|UniProtKB:P07872}.
P24666	63	ACP1	PPAC_HUMAN Low molecular weight phosphotyrosine protein phosphatase OS=Homo sapiens OX=9606 GN=ACP1 PE=1 SV=3	GQSC#MK|GQSC#MK	1|1	0.06|0.04	0.05	0.01414	2	2	4.7619		SUBCELLULAR LOCATION: Cytoplasm.
Q96CM8	254	ACSF2	ACSF2_HUMAN Medium-chain acyl-CoA ligase ACSF2, mitochondrial OS=Homo sapiens OX=9606 GN=ACSF2 PE=1 SV=2	QHLDQLQYNQQFLSC#HDPINIQFTSGTTGSPK|	2|	1.8|	1.8	NA	2	1	64.2857		SUBCELLULAR LOCATION: Mitochondrion {ECO:0000305}.
Q96CM8	77	ACSF2	ACSF2_HUMAN Medium-chain acyl-CoA ligase ACSF2, mitochondrial OS=Homo sapiens OX=9606 GN=ACSF2 PE=1 SV=2	|TVGQC#LETTAQR	|1	|0.73	0.73	NA	1	1	42.1965		SUBCELLULAR LOCATION: Mitochondrion {ECO:0000305}.
Q96CM8	462	ACSF2	ACSF2_HUMAN Medium-chain acyl-CoA ligase ACSF2, mitochondrial OS=Homo sapiens OX=9606 GN=ACSF2 PE=1 SV=2	LNTPGELC#IR|LNTPGELC#IR	1|2	0.44|0.53	0.485	0.06364	3	2	32.6599		SUBCELLULAR LOCATION: Mitochondrion {ECO:0000305}.
Q96CM8	64	ACSF2	ACSF2_HUMAN Medium-chain acyl-CoA ligase ACSF2, mitochondrial OS=Homo sapiens OX=9606 GN=ACSF2 PE=1 SV=2	MVSTPIGGLSYVQGC#TK|MVSTPIGGLSYVQGC#TK	3|2	0.5|0.095	0.2975	0.28638	5	2	22.9287		SUBCELLULAR LOCATION: Mitochondrion {ECO:0000305}.
Q96CM8	122	ACSF2	ACSF2_HUMAN Medium-chain acyl-CoA ligase ACSF2, mitochondrial OS=Homo sapiens OX=9606 GN=ACSF2 PE=1 SV=2	AASGLLSIGLC#K|AASGLLSIGLC#K	1|2	0.08|0.055	0.0675	0.01768	3	2	6.32319		SUBCELLULAR LOCATION: Mitochondrion {ECO:0000305}.
Q4G176	399	ACSF3	ACSF3_HUMAN Malonate--CoA ligase ACSF3, mitochondrial OS=Homo sapiens OX=9606 GN=ACSF3 PE=1 SV=3	EAC#SYTIHAEGDER|	1|	0.00098|	0.00098	NA	1	1	0		SUBCELLULAR LOCATION: Mitochondrion {ECO:0000269|PubMed:21841779, ECO:0000269|PubMed:21846720}.
P33121	241	ACSL1	ACSL1_HUMAN Long-chain-fatty-acid--CoA ligase 1 OS=Homo sapiens OX=9606 GN=ACSL1 PE=1 SV=1	|C#GVEVTSMK	|1	|8.56	8.56	NA	1	1	89.5397		SUBCELLULAR LOCATION: Mitochondrion outer membrane {ECO:0000250}; Single-pass type III membrane protein {ECO:0000250}. Peroxisome membrane {ECO:0000250}; Single-pass type III membrane protein {ECO:0000250}. Microsome membrane {ECO:0000250}; Single-pass type III membrane protein {ECO:0000250}. Endoplasmic reticulum membrane {ECO:0000269|PubMed:24269233}; Single-pass type III membrane protein {ECO:…
P33121	108	ACSL1	ACSL1_HUMAN Long-chain-fatty-acid--CoA ligase 1 OS=Homo sapiens OX=9606 GN=ACSL1 PE=1 SV=1	GIQVSNNGPC#LGSR|GIQVSNNGPC#LGSR	2|3	0.3|0.3	0.3	0	5	2	23.0769		SUBCELLULAR LOCATION: Mitochondrion outer membrane {ECO:0000250}; Single-pass type III membrane protein {ECO:0000250}. Peroxisome membrane {ECO:0000250}; Single-pass type III membrane protein {ECO:0000250}. Microsome membrane {ECO:0000250}; Single-pass type III membrane protein {ECO:0000250}. Endoplasmic reticulum membrane {ECO:0000269|PubMed:24269233}; Single-pass type III membrane protein {ECO:…
P33121	274	ACSL1	ACSL1_HUMAN Long-chain-fatty-acid--CoA ligase 1 OS=Homo sapiens OX=9606 GN=ACSL1 PE=1 SV=1	KPKPPAPEDLAVIC#FTSGTTGNPK|KPKPPAPEDLAVIC#FTSGTTGNPK	2|3	0.13|0.18	0.155	0.03536	5	2	13.4199		SUBCELLULAR LOCATION: Mitochondrion outer membrane {ECO:0000250}; Single-pass type III membrane protein {ECO:0000250}. Peroxisome membrane {ECO:0000250}; Single-pass type III membrane protein {ECO:0000250}. Microsome membrane {ECO:0000250}; Single-pass type III membrane protein {ECO:0000250}. Endoplasmic reticulum membrane {ECO:0000269|PubMed:24269233}; Single-pass type III membrane protein {ECO:…
O95573	429	ACSL3	ACSL3_HUMAN Long-chain-fatty-acid--CoA ligase 3 OS=Homo sapiens OX=9606 GN=ACSL3 PE=1 SV=3	NTPLC#DSFVFR|NTPLC#DSFVFR	3|3	0.33|0.45	0.39	0.08485	6	2	28.0576		SUBCELLULAR LOCATION: Mitochondrion outer membrane {ECO:0000250}; Single-pass type III membrane protein {ECO:0000250}. Peroxisome membrane {ECO:0000250}; Single-pass type III membrane protein {ECO:0000250}. Microsome membrane {ECO:0000250}; Single-pass type III membrane protein {ECO:0000250}. Endoplasmic reticulum membrane {ECO:0000250}; Single-pass type III membrane protein {ECO:0000250}.
O95573	166	ACSL3	ACSL3_HUMAN Long-chain-fatty-acid--CoA ligase 3 OS=Homo sapiens OX=9606 GN=ACSL3 PE=1 SV=3	TNIAIFC#ETR|TNIAIFC#ETR	2|3	0.335|0.27	0.3025	0.04596	5	2	23.2246		SUBCELLULAR LOCATION: Mitochondrion outer membrane {ECO:0000250}; Single-pass type III membrane protein {ECO:0000250}. Peroxisome membrane {ECO:0000250}; Single-pass type III membrane protein {ECO:0000250}. Microsome membrane {ECO:0000250}; Single-pass type III membrane protein {ECO:0000250}. Endoplasmic reticulum membrane {ECO:0000250}; Single-pass type III membrane protein {ECO:0000250}.
O95573	450	ACSL3	ACSL3_HUMAN Long-chain-fatty-acid--CoA ligase 3 OS=Homo sapiens OX=9606 GN=ACSL3 PE=1 SV=3	LLLC#GGAPLSATTQR|LLLC#GGAPLSATTQR	3|3	0.01|0.07	0.04	0.04243	6	2	3.84615		SUBCELLULAR LOCATION: Mitochondrion outer membrane {ECO:0000250}; Single-pass type III membrane protein {ECO:0000250}. Peroxisome membrane {ECO:0000250}; Single-pass type III membrane protein {ECO:0000250}. Microsome membrane {ECO:0000250}; Single-pass type III membrane protein {ECO:0000250}. Endoplasmic reticulum membrane {ECO:0000250}; Single-pass type III membrane protein {ECO:0000250}.
O60488	221	ACSL4	ACSL4_HUMAN Long-chain-fatty-acid--CoA ligase 4 OS=Homo sapiens OX=9606 GN=ACSL4 PE=1 SV=2	|TALLDISC#VK	|1	|1.6	1.6	NA	1	1	61.5385		SUBCELLULAR LOCATION: Mitochondrion outer membrane {ECO:0000250}; Single-pass type III membrane protein {ECO:0000250}. Peroxisome membrane {ECO:0000250}; Single-pass type III membrane protein {ECO:0000250}. Microsome membrane {ECO:0000250}; Single-pass type III membrane protein {ECO:0000250}. Endoplasmic reticulum membrane {ECO:0000269|PubMed:24269233}; Single-pass type III membrane protein {ECO:…
Q53FZ2	115	ACSM3	ACSM3_HUMAN Acyl-coenzyme A synthetase ACSM3, mitochondrial OS=Homo sapiens OX=9606 GN=ACSM3 PE=1 SV=2	FANILSEAC#SLQR|	1|	0.91|	0.91	NA	1	1	47.644		SUBCELLULAR LOCATION: Mitochondrion matrix {ECO:0000250|UniProtKB:Q3UNX5}.
Q9NUB1	422	ACSS1	ACS2L_HUMAN Acetyl-coenzyme A synthetase 2-like, mitochondrial OS=Homo sapiens OX=9606 GN=ACSS1 PE=1 SV=2	TLGSVGEPINC#EAWEWLHR|	1|	0.6|	0.6	NA	1	1	37.5		SUBCELLULAR LOCATION: Mitochondrion matrix {ECO:0000269|PubMed:16788062}.
Q9NR19	75	ACSS2	ACSA_HUMAN Acetyl-coenzyme A synthetase, cytoplasmic OS=Homo sapiens OX=9606 GN=ACSS2 PE=1 SV=1	TPC#PGPFLR|TPC#PGPFLR	3|2	0.02|0.10549	0.06274	0.06045	5	2	5.90361		SUBCELLULAR LOCATION: Cytoplasm, cytosol {ECO:0000269|PubMed:10843999, ECO:0000269|PubMed:28003429}.
Q562R1	218	ACTBL2	ACTBL_HUMAN Beta-actin-like protein 2 OS=Homo sapiens OX=9606 GN=ACTBL2 PE=1 SV=2	LC#YVALDFEQEMVRAAASSSPER|LC#YVALDFEQEMVRAAASSSPER	1|1	0.03|0.03	0.03	0	2	2	2.91262		SUBCELLULAR LOCATION: Cytoplasm, cytoskeleton {ECO:0000250}.
P63261	272	ACTG1	ACTG_HUMAN Actin, cytoplasmic 2 OS=Homo sapiens OX=9606 GN=ACTG1 PE=1 SV=1	CPEALFQPSFLGMESC#GIHETTFNSIMK|	1|	0.64|	0.64	NA	1	1	39.0244		SUBCELLULAR LOCATION: Cytoplasm, cytoskeleton {ECO:0000269|PubMed:28493397}.
P63261	17	ACTG1	ACTG_HUMAN Actin, cytoplasmic 2 OS=Homo sapiens OX=9606 GN=ACTG1 PE=1 SV=1	ALVIDNGSGMC#K|ALVIDNGSGMC#K	1|1	0.19|0.8	0.495	0.43134	2	2	33.1104		SUBCELLULAR LOCATION: Cytoplasm, cytoskeleton {ECO:0000269|PubMed:28493397}.
P63261	257	ACTG1	ACTG_HUMAN Actin, cytoplasmic 2 OS=Homo sapiens OX=9606 GN=ACTG1 PE=1 SV=1	C#PEALFQPSFLGMESCGIHETTFNSIMKCDVDIR C#PEALFQPSFLGMESCGIHETTFNSIMK|C#PEALFQPSFLGMESCGIHETTFNSIMKCDVDIR C#PEALFQPSFLGMESCGIHETTFNSIMK	5|4	0.4|0.16049	0.28025	0.16936	9	2	21.8903		SUBCELLULAR LOCATION: Cytoplasm, cytoskeleton {ECO:0000269|PubMed:28493397}.
O96019	206	ACTL6A	ACL6A_HUMAN Actin-like protein 6A OS=Homo sapiens OX=9606 GN=ACTL6A PE=1 SV=1	SPLAGDFITMQC#R|SPLAGDFITMQC#R	2|1	0.645|6.13	3.3875	3.87848	3	2	77.208		SUBCELLULAR LOCATION: Nucleus {ECO:0000269|PubMed:18026119}.
P12814	370	ACTN1	ACTN1_HUMAN Alpha-actinin-1 OS=Homo sapiens OX=9606 GN=ACTN1 PE=1 SV=2	MVSDINNAWGC#LEQVEK|MVSDINNAWGC#LEQVEK	1|2	0.34|0.345	0.3425	0.00354	3	2	25.5121		SUBCELLULAR LOCATION: Cytoplasm, cytoskeleton {ECO:0000269|PubMed:24069336, ECO:0000269|PubMed:7750553}. Cytoplasm, myofibril, sarcomere, Z line {ECO:0000269|PubMed:7750553}. Cell membrane {ECO:0000250|UniProtKB:Q9Z1P2}. Cell junction {ECO:0000250|UniProtKB:Q9Z1P2}. Cell projection, ruffle {ECO:0000250|UniProtKB:Q7TPR4}. Note=Colocalizes with MYOZ2 and PPP3CA at the Z-line of heart and skeletal m…
P12814	774	ACTN1	ACTN1_HUMAN Alpha-actinin-1 OS=Homo sapiens OX=9606 GN=ACTN1 PE=1 SV=2	AC#LISLGYDIGNDPQGEAEFAR|AC#LISLGYDIGNDPQGEAEFAR	3|3	0.31|0.00098	0.15549	0.21851	6	2	13.4566		SUBCELLULAR LOCATION: Cytoplasm, cytoskeleton {ECO:0000269|PubMed:24069336, ECO:0000269|PubMed:7750553}. Cytoplasm, myofibril, sarcomere, Z line {ECO:0000269|PubMed:7750553}. Cell membrane {ECO:0000250|UniProtKB:Q9Z1P2}. Cell junction {ECO:0000250|UniProtKB:Q9Z1P2}. Cell projection, ruffle {ECO:0000250|UniProtKB:Q7TPR4}. Note=Colocalizes with MYOZ2 and PPP3CA at the Z-line of heart and skeletal m…
P12814	180	ACTN1	ACTN1_HUMAN Alpha-actinin-1 OS=Homo sapiens OX=9606 GN=ACTN1 PE=1 SV=2	DGLGFC#ALIHR|DGLGFC#ALIHR	4|7	0.00549|0.01	0.00775	0.00319	11	2	0.76904		SUBCELLULAR LOCATION: Cytoplasm, cytoskeleton {ECO:0000269|PubMed:24069336, ECO:0000269|PubMed:7750553}. Cytoplasm, myofibril, sarcomere, Z line {ECO:0000269|PubMed:7750553}. Cell membrane {ECO:0000250|UniProtKB:Q9Z1P2}. Cell junction {ECO:0000250|UniProtKB:Q9Z1P2}. Cell projection, ruffle {ECO:0000250|UniProtKB:Q7TPR4}. Note=Colocalizes with MYOZ2 and PPP3CA at the Z-line of heart and skeletal m…
O43707	499	ACTN4	ACTN4_HUMAN Alpha-actinin-4 OS=Homo sapiens OX=9606 GN=ACTN4 PE=1 SV=2	IC#DQWDALGSLTHSR|IC#DQWDALGSLTHSR	6|6	0.09|0.00776	0.04888	0.05815	12	2	4.66021		SUBCELLULAR LOCATION: Nucleus {ECO:0000269|PubMed:22351778, ECO:0000269|PubMed:9508771}. Cytoplasm {ECO:0000269|PubMed:22351778, ECO:0000269|PubMed:9508771}. Cell junction {ECO:0000250|UniProtKB:P57780}. Cytoplasm, cytoskeleton, stress fiber {ECO:0000269|PubMed:9508771}. Note=Localized in cytoplasmic mRNP granules containing untranslated mRNAs. Nuclear translocation can be induced by the PI3 kina…
O43707	793	ACTN4	ACTN4_HUMAN Alpha-actinin-4 OS=Homo sapiens OX=9606 GN=ACTN4 PE=1 SV=2	AC#LISLGYDVENDRQGEAEFNR AC#LISLGYDVENDR|AC#LISLGYDVENDRQGEAEFNR AC#LISLGYDVENDR	4|3	0.025|0.01	0.0175	0.01061	7	2	1.7199		SUBCELLULAR LOCATION: Nucleus {ECO:0000269|PubMed:22351778, ECO:0000269|PubMed:9508771}. Cytoplasm {ECO:0000269|PubMed:22351778, ECO:0000269|PubMed:9508771}. Cell junction {ECO:0000250|UniProtKB:P57780}. Cytoplasm, cytoskeleton, stress fiber {ECO:0000269|PubMed:9508771}. Note=Localized in cytoplasmic mRNP granules containing untranslated mRNAs. Nuclear translocation can be induced by the PI3 kina…
O43707	495	ACTN4	ACTN4_HUMAN Alpha-actinin-4 OS=Homo sapiens OX=9606 GN=ACTN4 PE=1 SV=2	C#QKICDQWDALGSLTHSR|	1|	0.00098|	0.00098	NA	1	1	0		SUBCELLULAR LOCATION: Nucleus {ECO:0000269|PubMed:22351778, ECO:0000269|PubMed:9508771}. Cytoplasm {ECO:0000269|PubMed:22351778, ECO:0000269|PubMed:9508771}. Cell junction {ECO:0000250|UniProtKB:P57780}. Cytoplasm, cytoskeleton, stress fiber {ECO:0000269|PubMed:9508771}. Note=Localized in cytoplasmic mRNP granules containing untranslated mRNAs. Nuclear translocation can be induced by the PI3 kina…
Q9NZ32	27	ACTR10	ARP10_HUMAN Actin-related protein 10 OS=Homo sapiens OX=9606 GN=ACTR10 PE=1 SV=1	C#GFAGETGPR|C#GFAGETGPR	1|1	0.07|0.47	0.27	0.28284	2	2	21.2598		SUBCELLULAR LOCATION: Cytoplasm, cytoskeleton {ECO:0000250}.
Q9NZ32	215	ACTR10	ARP10_HUMAN Actin-related protein 10 OS=Homo sapiens OX=9606 GN=ACTR10 PE=1 SV=1	TC#FVSDLKR|TC#FVSDLKR TC#FVSDLK	1|2	0.00098|0.125	0.06299	0.0877	3	2	5.92574		SUBCELLULAR LOCATION: Cytoplasm, cytoskeleton {ECO:0000250}.
Q9NZ32	97	ACTR10	ARP10_HUMAN Actin-related protein 10 OS=Homo sapiens OX=9606 GN=ACTR10 PE=1 SV=1	VVIIESVLC#PSHFR|VVIIESVLC#PSHFR	2|2	0.00098|0.045	0.02299	0.03113	4	2	2.24733		SUBCELLULAR LOCATION: Cytoplasm, cytoskeleton {ECO:0000250}.
Q9NZ32	37	ACTR10	ARP10_HUMAN Actin-related protein 10 OS=Homo sapiens OX=9606 GN=ACTR10 PE=1 SV=1	C#IIPSVIK|C#IIPSVIK	1|1	0.03|0.00098	0.01549	0.02052	2	2	1.52537		SUBCELLULAR LOCATION: Cytoplasm, cytoskeleton {ECO:0000250}.
P61163	222	ACTR1A	ACTZ_HUMAN Alpha-centractin OS=Homo sapiens OX=9606 GN=ACTR1A PE=1 SV=1	AC#YLSINPQKDETLETEK|AC#YLSINPQKDETLETEK	5|4	0.13|0.155	0.1425	0.01768	9	2	12.4726		SUBCELLULAR LOCATION: Cytoplasm, cytoskeleton {ECO:0000250|UniProtKB:P85515}. Cytoplasm, cytoskeleton, microtubule organizing center, centrosome {ECO:0000269|PubMed:14654843}. Cytoplasm, cell cortex {ECO:0000269|PubMed:22327364}.
P42025	222	ACTR1B	ACTY_HUMAN Beta-centractin OS=Homo sapiens OX=9606 GN=ACTR1B PE=1 SV=1	AC#YLSINPQKDEALETEK|AC#YLSINPQKDEALETEK	2|2	0.675|2.105	1.39	1.01116	4	2	58.159		SUBCELLULAR LOCATION: Cytoplasm, cytoskeleton. Cytoplasm, cytoskeleton, microtubule organizing center, centrosome.
P61160	20	ACTR2	ARP2_HUMAN Actin-related protein 2 OS=Homo sapiens OX=9606 GN=ACTR2 PE=1 SV=1	C#GYAGSNFPEHIFPALVGRPIIR C#GYAGSNFPEHIFPALVGR|C#GYAGSNFPEHIFPALVGRPIIR	6|2	0.055|0.23	0.1425	0.12374	8	2	12.4726		SUBCELLULAR LOCATION: Cytoplasm, cytoskeleton {ECO:0000269|PubMed:9000076}. Cell projection {ECO:0000269|PubMed:9000076}. Nucleus {ECO:0000269|PubMed:17220302, ECO:0000269|PubMed:29925947}.
P61160	11	ACTR2	ARP2_HUMAN Actin-related protein 2 OS=Homo sapiens OX=9606 GN=ACTR2 PE=1 SV=1	KVVVC#DNGTGFVK VVVC#DNGTGFVK|KVVVC#DNGTGFVK VVVC#DNGTGFVK	4|5	0.01549|0.06	0.03775	0.03147	9	2	3.63768		SUBCELLULAR LOCATION: Cytoplasm, cytoskeleton {ECO:0000269|PubMed:9000076}. Cell projection {ECO:0000269|PubMed:9000076}. Nucleus {ECO:0000269|PubMed:17220302, ECO:0000269|PubMed:29925947}.
P61160	221	ACTR2	ARP2_HUMAN Actin-related protein 2 OS=Homo sapiens OX=9606 GN=ACTR2 PE=1 SV=1	LC#YVGYNIEQEQK|LC#YVGYNIEQEQK	1|2	0.07|0.00098	0.03549	0.0488	3	2	3.42736		SUBCELLULAR LOCATION: Cytoplasm, cytoskeleton {ECO:0000269|PubMed:9000076}. Cell projection {ECO:0000269|PubMed:9000076}. Nucleus {ECO:0000269|PubMed:17220302, ECO:0000269|PubMed:29925947}.
P61158	34	ACTR3	ARP3_HUMAN Actin-related protein 3 OS=Homo sapiens OX=9606 GN=ACTR3 PE=1 SV=3	LGYAGNTEPQFIIPSC#IAIK|LGYAGNTEPQFIIPSC#IAIK	2|2	0.45549|0.285	0.37024	0.12055	4	2	27.0201		SUBCELLULAR LOCATION: Cytoplasm, cytoskeleton {ECO:0000269|PubMed:19109554}. Cell projection {ECO:0000269|PubMed:9230079}. Nucleus {ECO:0000269|PubMed:16767080, ECO:0000269|PubMed:17220302, ECO:0000269|PubMed:29925947}. Note=In pre-apoptotic cells, colocalizes with MEFV in large specks (pyroptosomes) (PubMed:19109554).
P61158	189	ACTR3	ARP3_HUMAN Actin-related protein 3 OS=Homo sapiens OX=9606 GN=ACTR3 PE=1 SV=3	TLTGTVIDSGDGVTHVIPVAEGYVIGSC#IK|TLTGTVIDSGDGVTHVIPVAEGYVIGSC#IK	2|1	0.4|0.00098	0.20049	0.28215	3	2	16.7007		SUBCELLULAR LOCATION: Cytoplasm, cytoskeleton {ECO:0000269|PubMed:19109554}. Cell projection {ECO:0000269|PubMed:9230079}. Nucleus {ECO:0000269|PubMed:16767080, ECO:0000269|PubMed:17220302, ECO:0000269|PubMed:29925947}. Note=In pre-apoptotic cells, colocalizes with MEFV in large specks (pyroptosomes) (PubMed:19109554).
P61158	408	ACTR3	ARP3_HUMAN Actin-related protein 3 OS=Homo sapiens OX=9606 GN=ACTR3 PE=1 SV=3	KDYEEIGPSIC#R|KDYEEIGPSIC#R	4|6	0.21|0.115	0.1625	0.06718	10	2	13.9785		SUBCELLULAR LOCATION: Cytoplasm, cytoskeleton {ECO:0000269|PubMed:19109554}. Cell projection {ECO:0000269|PubMed:9230079}. Nucleus {ECO:0000269|PubMed:16767080, ECO:0000269|PubMed:17220302, ECO:0000269|PubMed:29925947}. Note=In pre-apoptotic cells, colocalizes with MEFV in large specks (pyroptosomes) (PubMed:19109554).
P61158	235	ACTR3	ARP3_HUMAN Actin-related protein 3 OS=Homo sapiens OX=9606 GN=ACTR3 PE=1 SV=3	YSYVC#PDLVK|YSYVC#PDLVK	1|2	0.04|0.03679	0.03839	0.00227	3	2	3.69707		SUBCELLULAR LOCATION: Cytoplasm, cytoskeleton {ECO:0000269|PubMed:19109554}. Cell projection {ECO:0000269|PubMed:9230079}. Nucleus {ECO:0000269|PubMed:16767080, ECO:0000269|PubMed:17220302, ECO:0000269|PubMed:29925947}. Note=In pre-apoptotic cells, colocalizes with MEFV in large specks (pyroptosomes) (PubMed:19109554).
Q9H9F9	265	ACTR5	ARP5_HUMAN Actin-related protein 5 OS=Homo sapiens OX=9606 GN=ACTR5 PE=1 SV=2	C#PDYYENNVHK|C#PDYYENNVHK	1|3	0.00098|0.21	0.10549	0.1478	4	2	9.54237		SUBCELLULAR LOCATION: Nucleus {ECO:0000269|PubMed:18026119, ECO:0000269|PubMed:18163988, ECO:0000269|PubMed:19014934}. Cytoplasm {ECO:0000269|PubMed:19014934}. Note=Predominantly nuclear but undergoes nucleo-cytoplasmic shuttling (PubMed:19014934). Localized to interphase nuclei, but not nucleoli; excluded from chromosomes as mitosis progresses (PubMed:18163988).
Q9GZN1	28	ACTR6	ARP6_HUMAN Actin-related protein 6 OS=Homo sapiens OX=9606 GN=ACTR6 PE=1 SV=1	IGYSHENVSVIPNC#QFR|	3|	0.57|	0.57	NA	3	1	36.3057		SUBCELLULAR LOCATION: Cytoplasm, cytoskeleton {ECO:0000250}. Nucleus {ECO:0000269|PubMed:16487625}. Note=Colocalizes with HP1 family proteins at pericentric heterochromatin.
Q9H981	340	ACTR8	ARP8_HUMAN Actin-related protein 8 OS=Homo sapiens OX=9606 GN=ACTR8 PE=1 SV=2	MDC#LLLQHLK|	1|	0.05|	0.05	NA	1	1	4.7619		SUBCELLULAR LOCATION: Nucleus {ECO:0000269|PubMed:18163988}. Chromosome {ECO:0000269|PubMed:18163988}. Note=Specifically localizes to mitotic chromosomes.
Q8TDG2	182	ACTRT1	ACTT1_HUMAN Actin-related protein T1 OS=Homo sapiens OX=9606 GN=ACTRT1 PE=2 SV=2	LC#MAGR|LC#MAGR	1|2	0.02|0.02241	0.02121	0.0017	3	2	2.07695		SUBCELLULAR LOCATION: Cytoplasm, cytoskeleton {ECO:0000305|PubMed:28869610}. Cytoplasm {ECO:0000269|PubMed:28869610}. Nucleus {ECO:0000269|PubMed:28869610}. Note=Both detected in the nucleus and cytoplasm, localizes to the nucleus where it binds chromatin upon stimulation of the Hedgehog pathway. {ECO:0000269|PubMed:28869610}.
Q04771	449	ACVR1	ACVR1_HUMAN Activin receptor type-1 OS=Homo sapiens OX=9606 GN=ACVR1 PE=1 SV=1	|VVC#VDQQRPNIPNR	|2	|0.17	0.17	NA	2	1	14.5299		SUBCELLULAR LOCATION: Membrane; Single-pass type I membrane protein.
Q03154	116	ACY1	ACY1_HUMAN Aminoacylase-1 OS=Homo sapiens OX=9606 GN=ACY1 PE=1 SV=1	C#VSIQYLEAVR|C#VSIQYLEAVR	1|1	0.22|0.22	0.22	0	2	2	18.0328		SUBCELLULAR LOCATION: Cytoplasm.
P14621	22	ACYP2	ACYP2_HUMAN Acylphosphatase-2 OS=Homo sapiens OX=9606 GN=ACYP2 PE=1 SV=2	VQGVC#FR|VQGVC#FR	1|1	0.18|0.38	0.28	0.14142	2	2	21.875
O14672	173	ADAM10	ADA10_HUMAN Disintegrin and metalloproteinase domain-containing protein 10 OS=Homo sapiens OX=9606 GN=ADAM10 PE=1 SV=1	YGPQGGC#ADHSVFER|YGPQGGC#ADHSVFER	5|5	0.01|0.18	0.095	0.12021	10	2	8.6758	Metal binding	SUBCELLULAR LOCATION: Cell membrane {ECO:0000269|PubMed:20624979, ECO:0000269|PubMed:23676497, ECO:0000269|PubMed:24990881, ECO:0000269|PubMed:26686862, ECO:0000269|PubMed:29430990, ECO:0000269|PubMed:30463011}; Single-pass type I membrane protein {ECO:0000305}. Golgi apparatus membrane {ECO:0000269|PubMed:12475894}; Single-pass type I membrane protein {ECO:0000305}. Cytoplasmic vesicle, clathrin…	Note=Zinc%3B in inhibited form;Ontology_term=ECO:0000250;evidence=ECO:0000250|UniProtKB:P03956
O14672	399	ADAM10	ADA10_HUMAN Disintegrin and metalloproteinase domain-containing protein 10 OS=Homo sapiens OX=9606 GN=ADAM10 PE=1 SV=1	VSHITFAHEVGHNFGSPHDSGTEC#TPGESK|VSHITFAHEVGHNFGSPHDSGTEC#TPGESK	2|2	0.97|0.07049	0.52024	0.63605	4	2	34.2209	Disulfide bond$Disulfide bond	SUBCELLULAR LOCATION: Cell membrane {ECO:0000269|PubMed:20624979, ECO:0000269|PubMed:23676497, ECO:0000269|PubMed:24990881, ECO:0000269|PubMed:26686862, ECO:0000269|PubMed:29430990, ECO:0000269|PubMed:30463011}; Single-pass type I membrane protein {ECO:0000305}. Golgi apparatus membrane {ECO:0000269|PubMed:12475894}; Single-pass type I membrane protein {ECO:0000305}. Cytoplasmic vesicle, clathrin…	Ontology_term=ECO:0000244,ECO:0000244,ECO:0000269;evidence=ECO:0000244|PDB:6BDZ,ECO:0000244|PDB:6BE6,ECO:0000269|PubMed:29224781;Dbxref=PMID:29224781$Ontology_term=ECO:0000244,ECO:0000244,ECO:0000269;evidence=ECO:0000244|PDB:6BDZ,ECO:0000244|PDB:6BE6,ECO:0000269|PubMed:29224781;Dbxref=PMID:29224781
O14672	435	ADAM10	ADA10_HUMAN Disintegrin and metalloproteinase domain-containing protein 10 OS=Homo sapiens OX=9606 GN=ADAM10 PE=1 SV=1	FSLC#SIR|FSLC#SIR	2|3	0.16|0.4	0.28	0.16971	5	2	21.875	Disulfide bond$Disulfide bond	SUBCELLULAR LOCATION: Cell membrane {ECO:0000269|PubMed:20624979, ECO:0000269|PubMed:23676497, ECO:0000269|PubMed:24990881, ECO:0000269|PubMed:26686862, ECO:0000269|PubMed:29430990, ECO:0000269|PubMed:30463011}; Single-pass type I membrane protein {ECO:0000305}. Golgi apparatus membrane {ECO:0000269|PubMed:12475894}; Single-pass type I membrane protein {ECO:0000305}. Cytoplasmic vesicle, clathrin…	Ontology_term=ECO:0000244,ECO:0000244,ECO:0000269;evidence=ECO:0000244|PDB:6BDZ,ECO:0000244|PDB:6BE6,ECO:0000269|PubMed:29224781;Dbxref=PMID:29224781$Ontology_term=ECO:0000244,ECO:0000244,ECO:0000269;evidence=ECO:0000244|PDB:6BDZ,ECO:0000244|PDB:6BE6,ECO:0000269|PubMed:29224781;Dbxref=PMID:29224781
O14672	639	ADAM10	ADA10_HUMAN Disintegrin and metalloproteinase domain-containing protein 10 OS=Homo sapiens OX=9606 GN=ADAM10 PE=1 SV=1	GYC#DVFMR|GYC#DVFMR	2|3	0.02549|0.12	0.07275	0.06683	5	2	6.78164	Disulfide bond$Disulfide bond	SUBCELLULAR LOCATION: Cell membrane {ECO:0000269|PubMed:20624979, ECO:0000269|PubMed:23676497, ECO:0000269|PubMed:24990881, ECO:0000269|PubMed:26686862, ECO:0000269|PubMed:29430990, ECO:0000269|PubMed:30463011}; Single-pass type I membrane protein {ECO:0000305}. Golgi apparatus membrane {ECO:0000269|PubMed:12475894}; Single-pass type I membrane protein {ECO:0000305}. Cytoplasmic vesicle, clathrin…	Ontology_term=ECO:0000244,ECO:0000244,ECO:0000269;evidence=ECO:0000244|PDB:6BDZ,ECO:0000244|PDB:6BE6,ECO:0000269|PubMed:29224781;Dbxref=PMID:29224781$Ontology_term=ECO:0000244,ECO:0000244,ECO:0000269;evidence=ECO:0000244|PDB:6BDZ,ECO:0000244|PDB:6BE6,ECO:0000269|PubMed:29224781;Dbxref=PMID:29224781
Q13444	571	ADAM15	ADA15_HUMAN Disintegrin and metalloproteinase domain-containing protein 15 OS=Homo sapiens OX=9606 GN=ADAM15 PE=1 SV=4	NPSGSYVSC#TPR|NPSGSYVSC#TPR	1|1	0.00098|0.05	0.02549	0.03466	2	2	2.48564		SUBCELLULAR LOCATION: Endomembrane system {ECO:0000269|PubMed:12243749}; Single-pass type I membrane protein {ECO:0000269|PubMed:12243749}. Cell junction, adherens junction {ECO:0000269|PubMed:12243749}. Cell projection, cilium, flagellum {ECO:0000250}. Cytoplasmic vesicle, secretory vesicle, acrosome {ECO:0000250}. Note=The majority of the protein is localized in a perinuclear compartment which …
Q13443	370	ADAM9	ADAM9_HUMAN Disintegrin and metalloproteinase domain-containing protein 9 OS=Homo sapiens OX=9606 GN=ADAM9 PE=1 SV=1	SC#IMNSGASGSR|SC#IMNSGASGSR	5|5	0.00098|0.05	0.02549	0.03466	10	2	2.48564	Disulfide bond$Disulfide bond$Disulfide bond	SUBCELLULAR LOCATION: [Isoform 1]: Cell membrane {ECO:0000269|PubMed:8647900}; Single-pass type I membrane protein {ECO:0000255}.; SUBCELLULAR LOCATION: [Isoform 2]: Secreted {ECO:0000269|PubMed:12054541}.	Ontology_term=ECO:0000250;evidence=ECO:0000250$Ontology_term=ECO:0000250;evidence=ECO:0000250$Ontology_term=ECO:0000250;evidence=ECO:0000250
Q13443	114	ADAM9	ADAM9_HUMAN Disintegrin and metalloproteinase domain-containing protein 9 OS=Homo sapiens OX=9606 GN=ADAM9 PE=1 SV=1	EGTLITDHPNIQNHC#HYR|EGTLITDHPNIQNHC#HYR	2|2	0.93549|0.24	0.58774	0.49179	4	2	37.0174		SUBCELLULAR LOCATION: [Isoform 1]: Cell membrane {ECO:0000269|PubMed:8647900}; Single-pass type I membrane protein {ECO:0000255}.; SUBCELLULAR LOCATION: [Isoform 2]: Secreted {ECO:0000269|PubMed:12054541}.
P55265	304	ADAR	DSRAD_HUMAN Double-stranded RNA-specific adenosine deaminase OS=Homo sapiens OX=9606 GN=ADAR PE=1 SV=4	IC#DYLFNVSDSSALNLAK|IC#DYLFNVSDSSALNLAK	1|1	0.3|0.13	0.215	0.12021	2	2	17.6955		SUBCELLULAR LOCATION: [Isoform 1]: Cytoplasm {ECO:0000269|PubMed:7565688}. Nucleus {ECO:0000269|PubMed:24753571, ECO:0000269|PubMed:7565688}. Note=Shuttles between the cytoplasm and nucleus (PubMed:7565688, PubMed:24753571). Nuclear import is mediated by TNPO1 (PubMed:24753571). {ECO:0000269|PubMed:24753571, ECO:0000269|PubMed:7565688}.; SUBCELLULAR LOCATION: [Isoform 5]: Cytoplasm {ECO:0000269|P…
P55265	622	ADAR	DSRAD_HUMAN Double-stranded RNA-specific adenosine deaminase OS=Homo sapiens OX=9606 GN=ADAR PE=1 SV=4	SPVTTLLEC#MHK|SPVTTLLEC#MHK	9|11	0.17|0.17	0.17	0	20	2	14.5299		SUBCELLULAR LOCATION: [Isoform 1]: Cytoplasm {ECO:0000269|PubMed:7565688}. Nucleus {ECO:0000269|PubMed:24753571, ECO:0000269|PubMed:7565688}. Note=Shuttles between the cytoplasm and nucleus (PubMed:7565688, PubMed:24753571). Nuclear import is mediated by TNPO1 (PubMed:24753571). {ECO:0000269|PubMed:24753571, ECO:0000269|PubMed:7565688}.; SUBCELLULAR LOCATION: [Isoform 5]: Cytoplasm {ECO:0000269|P…
P55265	909	ADAR	DSRAD_HUMAN Double-stranded RNA-specific adenosine deaminase OS=Homo sapiens OX=9606 GN=ADAR PE=1 SV=4	GETVNDC#HAEIISR|GETVNDC#HAEIISR	2|3	0.01049|0.03	0.02024	0.0138	5	2	1.98385		SUBCELLULAR LOCATION: [Isoform 1]: Cytoplasm {ECO:0000269|PubMed:7565688}. Nucleus {ECO:0000269|PubMed:24753571, ECO:0000269|PubMed:7565688}. Note=Shuttles between the cytoplasm and nucleus (PubMed:7565688, PubMed:24753571). Nuclear import is mediated by TNPO1 (PubMed:24753571). {ECO:0000269|PubMed:24753571, ECO:0000269|PubMed:7565688}.; SUBCELLULAR LOCATION: [Isoform 5]: Cytoplasm {ECO:0000269|P…
Q9BUB4	334	ADAT1	ADAT1_HUMAN tRNA-specific adenosine deaminase 1 OS=Homo sapiens OX=9606 GN=ADAT1 PE=1 SV=1	C#PYSQEAMQR|C#PYSQEAMQR	1|2	0.1|0.07	0.085	0.02121	3	2	7.8341
Q7Z6V5	15	ADAT2	ADAT2_HUMAN tRNA-specific adenosine deaminase 2 OS=Homo sapiens OX=9606 GN=ADAT2 PE=1 SV=1	AAPKPAASGAC#SVSAEETEK|AAPKPAASGAC#SVSAEETEK	1|1	0.06|0.42	0.24	0.25456	2	2	19.3548
P35611	525	ADD1	ADDA_HUMAN Alpha-adducin OS=Homo sapiens OX=9606 GN=ADD1 PE=1 SV=2	TAGPQSQVLC#GVVMDR|	1|	0.38|	0.38	NA	1	1	27.5362		SUBCELLULAR LOCATION: Cytoplasm, cytoskeleton. Cell membrane; Peripheral membrane protein; Cytoplasmic side.
Q86SQ4	231	ADGRG6	AGRG6_HUMAN Adhesion G-protein coupled receptor G6 OS=Homo sapiens OX=9606 GN=ADGRG6 PE=1 SV=3	C#LLNNALPVK|	1|	0.06|	0.06	NA	1	1	5.66038	Disulfide bond	SUBCELLULAR LOCATION: Cell membrane {ECO:0000269|PubMed:15189448, ECO:0000269|PubMed:15225624, ECO:0000269|PubMed:24227709}; Multi-pass membrane protein {ECO:0000255}. Note=Detected on the cell surface of activated but not resting umbilical vein. {ECO:0000269|PubMed:15225624}.	Ontology_term=ECO:0000255;evidence=ECO:0000255|PROSITE-ProRule:PRU01172
P11766	103	ADH5	ADHX_HUMAN Alcohol dehydrogenase class-3 OS=Homo sapiens OX=9606 GN=ADH5 PE=1 SV=4	FC#LNPK|FC#LNPK	3|3	0.00098|0.00825	0.00462	0.00514	6	2	0.459875	Metal binding	SUBCELLULAR LOCATION: Cytoplasm {ECO:0000305}.	Note=Zinc 2;Ontology_term=ECO:0000269;evidence=ECO:0000269|PubMed:3365377;Dbxref=PMID:3365377
P11766	282	ADH5	ADHX_HUMAN Alcohol dehydrogenase class-3 OS=Homo sapiens OX=9606 GN=ADH5 PE=1 SV=4	AALEAC#HK|	1|	0.04|	0.04	NA	1	1	3.84615		SUBCELLULAR LOCATION: Cytoplasm {ECO:0000305}.
P55263	353	ADK	ADK_HUMAN Adenosine kinase OS=Homo sapiens OX=9606 GN=ADK PE=1 SV=2	TGC#TFPEKPDFH|TGC#TFPEKPDFH	1|5	0.00098|0.1	0.05049	0.07002	6	2	4.80633		SUBCELLULAR LOCATION: [Isoform 1]: Nucleus {ECO:0000269|PubMed:19635462}.; SUBCELLULAR LOCATION: [Isoform 2]: Cytoplasm {ECO:0000269|PubMed:19635462}.
P55263	160	ADK	ADK_HUMAN Adenosine kinase OS=Homo sapiens OX=9606 GN=ADK PE=1 SV=2	SLIANLAAANC#YK|SLIANLAAANC#YK	3|4	0.03|0.07	0.05	0.02828	7	2	4.7619		SUBCELLULAR LOCATION: [Isoform 1]: Nucleus {ECO:0000269|PubMed:19635462}.; SUBCELLULAR LOCATION: [Isoform 2]: Cytoplasm {ECO:0000269|PubMed:19635462}.
Q9H2P0	226	ADNP	ADNP_HUMAN Activity-dependent neuroprotector homeobox protein OS=Homo sapiens OX=9606 GN=ADNP PE=1 SV=1	C#LFMPK|C#LFMPK	4|4	0.44|0.54	0.49	0.07071	8	2	32.8859		SUBCELLULAR LOCATION: Nucleus {ECO:0000255|PROSITE-ProRule:PRU00108}.
Q96SZ5	183	ADO	AEDO_HUMAN 2-aminoethanethiol dioxygenase OS=Homo sapiens OX=9606 GN=ADO PE=1 SV=2	AEYTEASGPC#ILTPHR|AEYTEASGPC#ILTPHR	2|2	0.38549|0.665	0.52524	0.19764	4	2	34.4365
Q9BRR6	470	ADPGK	ADPGK_HUMAN ADP-dependent glucokinase OS=Homo sapiens OX=9606 GN=ADPGK PE=1 SV=1	EGISFHFTPVLVC#K|EGISFHFTPVLVC#K	2|3	0.05049|0.07	0.06025	0.0138	5	2	5.68262		SUBCELLULAR LOCATION: Secreted {ECO:0000305}.
Q9BRR6	178	ADPGK	ADPGK_HUMAN ADP-dependent glucokinase OS=Homo sapiens OX=9606 GN=ADPGK PE=1 SV=1	VLLC#GPVGPK|VLLC#GPVGPK	5|5	0.00449|0.0034	0.00394	0.00077	10	2	0.392454		SUBCELLULAR LOCATION: Secreted {ECO:0000305}.
Q16186	80	ADRM1	ADRM1_HUMAN Proteasomal ubiquitin receptor ADRM1 OS=Homo sapiens OX=9606 GN=ADRM1 PE=1 SV=2	TSGNVEDDLIIFPDDC#EFKR|TSGNVEDDLIIFPDDC#EFKR	2|1	1.72|0.72	1.22	0.70711	3	2	54.955		SUBCELLULAR LOCATION: Cytoplasm {ECO:0000269|PubMed:16990800}. Nucleus {ECO:0000269|PubMed:16990800}.
Q16186	88	ADRM1	ADRM1_HUMAN Proteasomal ubiquitin receptor ADRM1 OS=Homo sapiens OX=9606 GN=ADRM1 PE=1 SV=2	VPQC#PSGR|VPQC#PSGR	1|3	0.33|0.03	0.18	0.21213	4	2	15.2542		SUBCELLULAR LOCATION: Cytoplasm {ECO:0000269|PubMed:16990800}. Nucleus {ECO:0000269|PubMed:16990800}.
P30520	58	ADSS	PURA2_HUMAN Adenylosuccinate synthetase isozyme 2 OS=Homo sapiens OX=9606 GN=ADSS PE=1 SV=3	VVDLLAQDADIVC#R|VVDLLAQDADIVC#R	2|1	0.08049|0.00098	0.04074	0.05622	3	2	3.91452		SUBCELLULAR LOCATION: Cytoplasm {ECO:0000255|HAMAP-Rule:MF_03127}. Mitochondrion {ECO:0000250|UniProtKB:A4Z6H1}. Note=Partially associated with particulate fractions.
P30520	182	ADSS	PURA2_HUMAN Adenylosuccinate synthetase isozyme 2 OS=Homo sapiens OX=9606 GN=ADSS PE=1 SV=3	MC#DLVSDFDGFSER|	1|	0.00098|	0.00098	NA	1	1	0		SUBCELLULAR LOCATION: Cytoplasm {ECO:0000255|HAMAP-Rule:MF_03127}. Mitochondrion {ECO:0000250|UniProtKB:A4Z6H1}. Note=Partially associated with particulate fractions.
Q8N556	157	AFAP1	AFAP1_HUMAN Actin filament-associated protein 1 OS=Homo sapiens OX=9606 GN=AFAP1 PE=1 SV=2	|IC#AFLLR	|1	|3.48	3.48	NA	1	1	77.6786		SUBCELLULAR LOCATION: Cytoplasm, cytoskeleton, stress fiber {ECO:0000269|PubMed:15485829}.
Q8N556	471	AFAP1	AFAP1_HUMAN Actin filament-associated protein 1 OS=Homo sapiens OX=9606 GN=AFAP1 PE=1 SV=2	QTFC#FMNR|	1|	0.12|	0.12	NA	1	1	10.7143		SUBCELLULAR LOCATION: Cytoplasm, cytoskeleton, stress fiber {ECO:0000269|PubMed:15485829}.
Q8N4X5	292	AFAP1L2	AF1L2_HUMAN Actin filament-associated protein 1-like 2 OS=Homo sapiens OX=9606 GN=AFAP1L2 PE=1 SV=1	FNC#QKPDIAEK|FNC#QKPDIAEK	2|3	1.635|1.11	1.3725	0.37123	5	2	57.8504		SUBCELLULAR LOCATION: Cytoplasm {ECO:0000269|PubMed:17412687}.
Q8N4X5	36	AFAP1L2	AF1L2_HUMAN Actin filament-associated protein 1-like 2 OS=Homo sapiens OX=9606 GN=AFAP1L2 PE=1 SV=1	SC#LAELLR|SC#LAELLR	3|1	0.04|0.3	0.17	0.18385	4	2	14.5299		SUBCELLULAR LOCATION: Cytoplasm {ECO:0000269|PubMed:17412687}.
Q8N4X5	467	AFAP1L2	AF1L2_HUMAN Actin filament-associated protein 1-like 2 OS=Homo sapiens OX=9606 GN=AFAP1L2 PE=1 SV=1	|VSC#IVSAAK	|1	|0.07	0.07	NA	1	1	6.54206		SUBCELLULAR LOCATION: Cytoplasm {ECO:0000269|PubMed:17412687}.
P55196	1684	AFDN	AFAD_HUMAN Afadin OS=Homo sapiens OX=9606 GN=AFDN PE=1 SV=3	LLEPEAPGLC#RPPLPR|LLEPEAPGLC#RPPLPR	4|3	0.345|0.09	0.2175	0.18031	7	2	17.8645		SUBCELLULAR LOCATION: Cell junction, adherens junction {ECO:0000269|PubMed:30463011}. Note=Not found at cell-matrix AJs. {ECO:0000250|UniProtKB:O35889}.
P55196	841	AFDN	AFAD_HUMAN Afadin OS=Homo sapiens OX=9606 GN=AFDN PE=1 SV=3	QGLELAADC#HLSR|QGLELAADC#HLSR	2|1	0.255|0.00098	0.12799	0.17962	3	2	11.3467		SUBCELLULAR LOCATION: Cell junction, adherens junction {ECO:0000269|PubMed:30463011}. Note=Not found at cell-matrix AJs. {ECO:0000250|UniProtKB:O35889}.
Q9Y4W6	626	AFG3L2	AFG32_HUMAN AFG3-like protein 2 OS=Homo sapiens OX=9606 GN=AFG3L2 PE=1 SV=2	MC#MTLGGR|MC#MTLGGR	1|1	0.26|0.85	0.555	0.41719	2	2	35.6913		SUBCELLULAR LOCATION: Mitochondrion {ECO:0000269|PubMed:10395799, ECO:0000269|PubMed:22354088}. Mitochondrion inner membrane {ECO:0000250|UniProtKB:Q8JZQ2}; Multi-pass membrane protein {ECO:0000255}.
Q9Y4W6	402	AFG3L2	AFG32_HUMAN AFG3-like protein 2 OS=Homo sapiens OX=9606 GN=AFG3L2 PE=1 SV=2	KNAPC#ILFIDEIDAVGR NAPC#ILFIDEIDAVGRK|	2|	0.345|	0.345	NA	2	1	25.6506		SUBCELLULAR LOCATION: Mitochondrion {ECO:0000269|PubMed:10395799, ECO:0000269|PubMed:22354088}. Mitochondrion inner membrane {ECO:0000250|UniProtKB:Q8JZQ2}; Multi-pass membrane protein {ECO:0000255}.
Q9Y4W6	14	AFG3L2	AFG32_HUMAN AFG3-like protein 2 OS=Homo sapiens OX=9606 GN=AFG3L2 PE=1 SV=2	GGC#WPR|GGC#WPR	4|4	0.00098|0.00549	0.00324	0.00319	8	2	0.322954		SUBCELLULAR LOCATION: Mitochondrion {ECO:0000269|PubMed:10395799, ECO:0000269|PubMed:22354088}. Mitochondrion inner membrane {ECO:0000250|UniProtKB:Q8JZQ2}; Multi-pass membrane protein {ECO:0000255}.
Q53H12	408	AGK	AGK_HUMAN Acylglycerol kinase, mitochondrial OS=Homo sapiens OX=9606 GN=AGK PE=1 SV=2	KLQFFC#DPR|KLQFFC#DPR	3|3	0.00098|0.34	0.17049	0.23972	6	2	14.5657		SUBCELLULAR LOCATION: Mitochondrion inner membrane {ECO:0000269|PubMed:15939762, ECO:0000269|PubMed:16269826, ECO:0000269|PubMed:28712724, ECO:0000269|PubMed:28712726}; Peripheral membrane protein {ECO:0000269|PubMed:28712724}. Mitochondrion intermembrane space {ECO:0000269|PubMed:28712724, ECO:0000269|PubMed:28712726}. Note=Localizes in the mitochondrion intermembrane space, where it associates …
Q53H12	72	AGK	AGK_HUMAN Acylglycerol kinase, mitochondrial OS=Homo sapiens OX=9606 GN=AGK PE=1 SV=2	ATVFLNPAAC#K|ATVFLNPAAC#K	3|2	0.05|0.035	0.0425	0.01061	5	2	4.07674		SUBCELLULAR LOCATION: Mitochondrion inner membrane {ECO:0000269|PubMed:15939762, ECO:0000269|PubMed:16269826, ECO:0000269|PubMed:28712724, ECO:0000269|PubMed:28712726}; Peripheral membrane protein {ECO:0000269|PubMed:28712724}. Mitochondrion intermembrane space {ECO:0000269|PubMed:28712724, ECO:0000269|PubMed:28712726}. Note=Localizes in the mitochondrion intermembrane space, where it associates …
P35573	528	AGL	GDE_HUMAN Glycogen debranching enzyme OS=Homo sapiens OX=9606 GN=AGL PE=1 SV=3	|LDNC#HSTPLHVAEYMLDAAR	|1	|2.94	2.94	NA	1	1	74.6193		SUBCELLULAR LOCATION: Cytoplasm {ECO:0000269|PubMed:17908927}. Note=Under glycogenolytic conditions localizes to the nucleus.
P35573	957	AGL	GDE_HUMAN Glycogen debranching enzyme OS=Homo sapiens OX=9606 GN=AGL PE=1 SV=3	NDLGHPFC#NNLR|NDLGHPFC#NNLR	5|2	0.04|0.00098	0.02049	0.02759	7	2	2.00786		SUBCELLULAR LOCATION: Cytoplasm {ECO:0000269|PubMed:17908927}. Note=Under glycogenolytic conditions localizes to the nucleus.
P35573	1256	AGL	GDE_HUMAN Glycogen debranching enzyme OS=Homo sapiens OX=9606 GN=AGL PE=1 SV=3	FNC#GTWMDK|FNC#GTWMDK	1|1	0.03|0.00098	0.01549	0.02052	2	2	1.52537		SUBCELLULAR LOCATION: Cytoplasm {ECO:0000269|PubMed:17908927}. Note=Under glycogenolytic conditions localizes to the nucleus.
P35573	126	AGL	GDE_HUMAN Glycogen debranching enzyme OS=Homo sapiens OX=9606 GN=AGL PE=1 SV=3	VGADNHVLPLDC#VTLQTFLAK|VGADNHVLPLDC#VTLQTFLAK	1|1	0.00098|0.00098	0.00098	0	2	2	0		SUBCELLULAR LOCATION: Cytoplasm {ECO:0000269|PubMed:17908927}. Note=Under glycogenolytic conditions localizes to the nucleus.
Q9BSE5	57	AGMAT	SPEB_HUMAN Agmatinase, mitochondrial OS=Homo sapiens OX=9606 GN=AGMAT PE=1 SV=2	PVGVC#SMMR|PVGVC#SMMR	1|1	1.24|0.05	0.645	0.84146	2	2	39.2097		SUBCELLULAR LOCATION: Mitochondrion.
Q9UL18	562	AGO1	AGO1_HUMAN Protein argonaute-1 OS=Homo sapiens OX=9606 GN=AGO1 PE=1 SV=3	TSPQTLSNLC#LK|TSPQTLSNLC#LK	1|2	0.51|0.79	0.65	0.19799	3	2	39.3939		SUBCELLULAR LOCATION: Cytoplasm, P-body {ECO:0000269|PubMed:16289642, ECO:0000269|PubMed:20616046}.
Q9UKV8	564	AGO2	AGO2_HUMAN Protein argonaute-2 OS=Homo sapiens OX=9606 GN=AGO2 PE=1 SV=3	|TTPQTLSNLC#LK	|1	|0.00098	0.00098	NA	1	1	0		SUBCELLULAR LOCATION: Cytoplasm, P-body {ECO:0000269|PubMed:23125361}. Nucleus {ECO:0000269|PubMed:23125361}. Note=Translational repression of mRNAs results in their recruitment to P-bodies. Translocation to the nucleus requires IMP8.
O00116	349	AGPS	ADAS_HUMAN Alkyldihydroxyacetonephosphate synthase, peroxisomal OS=Homo sapiens OX=9606 GN=AGPS PE=1 SV=1	|SC#QGPR	|3	|0.48	0.48	NA	3	1	32.4324		SUBCELLULAR LOCATION: Peroxisome membrane {ECO:0000250|UniProtKB:P97275}. Peroxisome {ECO:0000250|UniProtKB:P97275}.
O00116	404	AGPS	ADAS_HUMAN Alkyldihydroxyacetonephosphate synthase, peroxisomal OS=Homo sapiens OX=9606 GN=AGPS PE=1 SV=1	YGSVAFPNFEQGVAC#LR|YGSVAFPNFEQGVAC#LR	5|4	0.27|0.265	0.2675	0.00354	9	2	21.1045		SUBCELLULAR LOCATION: Peroxisome membrane {ECO:0000250|UniProtKB:P97275}. Peroxisome {ECO:0000250|UniProtKB:P97275}.
O00116	565	AGPS	ADAS_HUMAN Alkyldihydroxyacetonephosphate synthase, peroxisomal OS=Homo sapiens OX=9606 GN=AGPS PE=1 SV=1	GVQFAPFSTC#R|GVQFAPFSTC#R	3|2	0.22|0.195	0.2075	0.01768	5	2	17.1843		SUBCELLULAR LOCATION: Peroxisome membrane {ECO:0000250|UniProtKB:P97275}. Peroxisome {ECO:0000250|UniProtKB:P97275}.
O00116	190	AGPS	ADAS_HUMAN Alkyldihydroxyacetonephosphate synthase, peroxisomal OS=Homo sapiens OX=9606 GN=AGPS PE=1 SV=1	AHGHC#LHEIFLLR|AHGHC#LHEIFLLR	2|1	0.01549|0.08	0.04775	0.04562	3	2	4.55738		SUBCELLULAR LOCATION: Peroxisome membrane {ECO:0000250|UniProtKB:P97275}. Peroxisome {ECO:0000250|UniProtKB:P97275}.
O00116	214	AGPS	ADAS_HUMAN Alkyldihydroxyacetonephosphate synthase, peroxisomal OS=Homo sapiens OX=9606 GN=AGPS PE=1 SV=1	IPDIVLWPTC#HDDVVK|IPDIVLWPTC#HDDVVK	5|4	0.00098|0.00098	0.00098	0	9	2	0		SUBCELLULAR LOCATION: Peroxisome membrane {ECO:0000250|UniProtKB:P97275}. Peroxisome {ECO:0000250|UniProtKB:P97275}.
O00116	297	AGPS	ADAS_HUMAN Alkyldihydroxyacetonephosphate synthase, peroxisomal OS=Homo sapiens OX=9606 GN=AGPS PE=1 SV=1	|ESGYC#TGHEPDSLEFSTVGGWVSTR	|1	|0.00098	0.00098	NA	1	1	0		SUBCELLULAR LOCATION: Peroxisome membrane {ECO:0000250|UniProtKB:P97275}. Peroxisome {ECO:0000250|UniProtKB:P97275}.
O95994	81	AGR2	AGR2_HUMAN Anterior gradient protein 2 homolog OS=Homo sapiens OX=9606 GN=AGR2 PE=1 SV=1	TSNKPLMIIHHLDEC#PHSQALK|TSNKPLMIIHHLDEC#PHSQALK	5|4	0.00098|0.26	0.13049	0.18315	9	2	11.5428	Mutagenesis	SUBCELLULAR LOCATION: Secreted {ECO:0000269|PubMed:15834940}. Endoplasmic reticulum {ECO:0000250}.	Note=Loss of interaction with MUC2. C->S;Ontology_term=ECO:0000269;evidence=ECO:0000269|PubMed:19359471;Dbxref=PMID:19359471
O00468	1822	AGRN	AGRIN_HUMAN Agrin OS=Homo sapiens OX=9606 GN=AGRN PE=1 SV=6	QVDVTSFAGHPC#TR|QVDVTSFAGHPC#TR	2|3	0.07|0.1	0.085	0.02121	5	2	7.8341	Disulfide bond	SUBCELLULAR LOCATION: [Isoform 1]: Secreted, extracellular space, extracellular matrix {ECO:0000269|PubMed:20551380}. Note=Synaptic basal lamina at the neuromuscular junction. {ECO:0000250|UniProtKB:P31696}.; SUBCELLULAR LOCATION: [Isoform 2]: Cell junction, synapse {ECO:0000250|UniProtKB:A2ASQ1}. Cell membrane {ECO:0000250|UniProtKB:A2ASQ1}; Single-pass type II membrane protein {ECO:0000250|UniP…	Ontology_term=ECO:0000250;evidence=ECO:0000250
Q8WYP5	354	AHCTF1	ELYS_HUMAN Protein ELYS OS=Homo sapiens OX=9606 GN=AHCTF1 PE=1 SV=3	LLGC#QSIEK|LLGC#QSIEK	2|2	0.69|1.065	0.8775	0.26517	4	2	46.7377		SUBCELLULAR LOCATION: Cytoplasm {ECO:0000250|UniProtKB:Q8CJF7}. Nucleus {ECO:0000269|PubMed:17098863, ECO:0000269|PubMed:27341616}. Nucleus envelope {ECO:0000269|PubMed:17098863, ECO:0000269|PubMed:27341616}. Nucleus matrix {ECO:0000269|PubMed:17098863}. Chromosome, centromere, kinetochore {ECO:0000269|PubMed:17098863, ECO:0000269|PubMed:27341616}. Nucleus, nucleoplasm {ECO:0000269|PubMed:1709886…
Q8WYP5	1131	AHCTF1	ELYS_HUMAN Protein ELYS OS=Homo sapiens OX=9606 GN=AHCTF1 PE=1 SV=3	|PSQC#SEFIQQSSMK	|1	|0.85	0.85	NA	1	1	45.9459		SUBCELLULAR LOCATION: Cytoplasm {ECO:0000250|UniProtKB:Q8CJF7}. Nucleus {ECO:0000269|PubMed:17098863, ECO:0000269|PubMed:27341616}. Nucleus envelope {ECO:0000269|PubMed:17098863, ECO:0000269|PubMed:27341616}. Nucleus matrix {ECO:0000269|PubMed:17098863}. Chromosome, centromere, kinetochore {ECO:0000269|PubMed:17098863, ECO:0000269|PubMed:27341616}. Nucleus, nucleoplasm {ECO:0000269|PubMed:1709886…
Q8WYP5	521	AHCTF1	ELYS_HUMAN Protein ELYS OS=Homo sapiens OX=9606 GN=AHCTF1 PE=1 SV=3	C#LVAGLLSPR|C#LVAGLLSPR	1|1	0.00098|0.00098	0.00098	0	2	2	0		SUBCELLULAR LOCATION: Cytoplasm {ECO:0000250|UniProtKB:Q8CJF7}. Nucleus {ECO:0000269|PubMed:17098863, ECO:0000269|PubMed:27341616}. Nucleus envelope {ECO:0000269|PubMed:17098863, ECO:0000269|PubMed:27341616}. Nucleus matrix {ECO:0000269|PubMed:17098863}. Chromosome, centromere, kinetochore {ECO:0000269|PubMed:17098863, ECO:0000269|PubMed:27341616}. Nucleus, nucleoplasm {ECO:0000269|PubMed:1709886…
P23526	421	AHCY	SAHH_HUMAN Adenosylhomocysteinase OS=Homo sapiens OX=9606 GN=AHCY PE=1 SV=4	QAQYLGMSC#DGPFKPDHYR|QAQYLGMSC#DGPFKPDHYR	25|22	0.1|0.11	0.105	0.00707	47	2	9.50226		SUBCELLULAR LOCATION: Cytoplasm {ECO:0000269|PubMed:17081065}. Melanosome {ECO:0000269|PubMed:17081065}. Note=Identified by mass spectrometry in melanosome fractions from stage I to stage IV.
P23526	195	AHCY	SAHH_HUMAN Adenosylhomocysteinase OS=Homo sapiens OX=9606 GN=AHCY PE=1 SV=4	SKFDNLYGC#R FDNLYGC#R|SKFDNLYGC#R FDNLYGC#R	5|8	0.06|0.145	0.1025	0.0601	13	2	9.29705		SUBCELLULAR LOCATION: Cytoplasm {ECO:0000269|PubMed:17081065}. Melanosome {ECO:0000269|PubMed:17081065}. Note=Identified by mass spectrometry in melanosome fractions from stage I to stage IV.
P23526	228	AHCY	SAHH_HUMAN Adenosylhomocysteinase OS=Homo sapiens OX=9606 GN=AHCY PE=1 SV=4	GC#AQALR|GC#AQALR	1|1	0.09|0.01	0.05	0.05657	2	2	4.7619		SUBCELLULAR LOCATION: Cytoplasm {ECO:0000269|PubMed:17081065}. Melanosome {ECO:0000269|PubMed:17081065}. Note=Identified by mass spectrometry in melanosome fractions from stage I to stage IV.
Q96HN2	398	AHCYL2	SAHH3_HUMAN Adenosylhomocysteinase 3 OS=Homo sapiens OX=9606 GN=AHCYL2 PE=1 SV=1	QVVVC#GYGEVGK|	1|	2.37|	2.37	NA	1	1	70.3264		SUBCELLULAR LOCATION: Cytoplasm {ECO:0000250|UniProtKB:A6QLP2, ECO:0000250|UniProtKB:Q68FL4}. Microsome {ECO:0000250|UniProtKB:Q68FL4}. Note=Associates with membranes when phosphorylated, probably through interaction with ITPR1. {ECO:0000250|UniProtKB:Q68FL4}.
Q09666	5502	AHNAK	AHNK_HUMAN Neuroblast differentiation-associated protein AHNAK OS=Homo sapiens OX=9606 GN=AHNAK PE=1 SV=2	SSGC#DVNLPGVNVK|SSGC#DVNLPGVNVK	1|1	1.2|0.79	0.995	0.28991	2	2	49.8747		SUBCELLULAR LOCATION: Nucleus.
Q8IVF2	405	AHNAK2	AHNK2_HUMAN Protein AHNAK2 OS=Homo sapiens OX=9606 GN=AHNAK2 PE=1 SV=2	LC#EGTPQEGGLR|LC#EGTPQEGGLR	1|2	0.85|0.67	0.76	0.12728	3	2	43.1818		SUBCELLULAR LOCATION: Nucleus {ECO:0000250}.
Q8IVF2	4787	AHNAK2	AHNK2_HUMAN Protein AHNAK2 OS=Homo sapiens OX=9606 GN=AHNAK2 PE=1 SV=2	LDLTGPHFESSILSPC#EDVTLTK|LDLTGPHFESSILSPC#EDVTLTK	2|1	0.185|0.38	0.2825	0.13789	3	2	22.0273		SUBCELLULAR LOCATION: Nucleus {ECO:0000250}.
Q8IVF2	4223	AHNAK2	AHNK2_HUMAN Protein AHNAK2 OS=Homo sapiens OX=9606 GN=AHNAK2 PE=1 SV=2	VQMPC#LK|VQMPC#LK	3|4	0.01|0.045	0.0275	0.02475	7	2	2.6764		SUBCELLULAR LOCATION: Nucleus {ECO:0000250}.
O95433	56	AHSA1	AHSA1_HUMAN Activator of 90 kDa heat shock protein ATPase homolog 1 OS=Homo sapiens OX=9606 GN=AHSA1 PE=1 SV=1	VQVQNEEGKC#EVTEVSK AVQVQNEEGKC#EVTEVSK|	2|	1.51|	1.51	NA	2	1	60.1594		SUBCELLULAR LOCATION: Cytoplasm, cytosol {ECO:0000269|PubMed:11554768}. Endoplasmic reticulum {ECO:0000269|PubMed:11554768}. Note=May transiently interact with the endoplasmic reticulum.
Q96BJ3	69	AIDA	AIDA_HUMAN Axin interactor, dorsalization-associated protein OS=Homo sapiens OX=9606 GN=AIDA PE=1 SV=1	IATC#LELR|IATC#LELR	1|1	0.00098|0.04	0.02049	0.02759	2	2	2.00786
O95831	256	AIFM1	AIFM1_HUMAN Apoptosis-inducing factor 1, mitochondrial OS=Homo sapiens OX=9606 GN=AIFM1 PE=1 SV=1	C#LIATGGTPR|C#LIATGGTPR	3|3	0.00544|0.00098	0.00321	0.00315	6	2	0.319973		SUBCELLULAR LOCATION: Mitochondrion intermembrane space {ECO:0000269|PubMed:15775970, ECO:0000269|PubMed:24914854, ECO:0000269|PubMed:26004228}. Mitochondrion inner membrane. Cytoplasm {ECO:0000269|PubMed:15775970}. Nucleus {ECO:0000269|PubMed:15775970, ECO:0000269|PubMed:17094969}. Cytoplasm, perinuclear region {ECO:0000269|PubMed:17094969}. Note=Proteolytic cleavage during or just after translo…
Q9BRQ8	286	AIFM2	AIFM2_HUMAN Apoptosis-inducing factor 2 OS=Homo sapiens OX=9606 GN=AIFM2 PE=1 SV=1	VNEHLQVEGHSNVYAIGDC#ADVR|VNEHLQVEGHSNVYAIGDC#ADVR	2|1	1.62049|5.84	3.73025	2.98364	3	2	78.8595		SUBCELLULAR LOCATION: Lipid droplet {ECO:0000269|PubMed:31634900}. Cell membrane {ECO:0000269|PubMed:31634900}; Lipid-anchor {ECO:0000305}. Cytoplasm {ECO:0000269|PubMed:11980907, ECO:0000269|PubMed:12135761, ECO:0000269|PubMed:26689472}. Mitochondrion membrane {ECO:0000269|PubMed:11980907, ECO:0000269|PubMed:26689472}. Nucleus {ECO:0000269|PubMed:26689472}.
Q12904	284	AIMP1	AIMP1_HUMAN Aminoacyl tRNA synthase complex-interacting multifunctional protein 1 OS=Homo sapiens OX=9606 GN=AIMP1 PE=1 SV=2	IWEQIQPDLHTNDEC#VATYK|IWEQIQPDLHTNDEC#VATYK	4|2	0.14|0.745	0.4425	0.4278	6	2	30.6759		SUBCELLULAR LOCATION: Nucleus {ECO:0000269|PubMed:14500886}. Cytoplasm, cytosol {ECO:0000269|PubMed:19289464}. Secreted {ECO:0000269|PubMed:10850427}. Endoplasmic reticulum {ECO:0000250|UniProtKB:P31230}. Golgi apparatus {ECO:0000250|UniProtKB:P31230}. Note=Enriched in secretory vesicles of pancreatic alpha cells and secreted from the pancreas in response to low glucose levels (By similarity). Se…
Q12904	229	AIMP1	AIMP1_HUMAN Aminoacyl tRNA synthase complex-interacting multifunctional protein 1 OS=Homo sapiens OX=9606 GN=AIMP1 PE=1 SV=2	GVLSQAMVMC#ASSPEK|GVLSQAMVMC#ASSPEK	7|9	0.00945|0.12	0.06473	0.07817	16	2	6.07948		SUBCELLULAR LOCATION: Nucleus {ECO:0000269|PubMed:14500886}. Cytoplasm, cytosol {ECO:0000269|PubMed:19289464}. Secreted {ECO:0000269|PubMed:10850427}. Endoplasmic reticulum {ECO:0000250|UniProtKB:P31230}. Golgi apparatus {ECO:0000250|UniProtKB:P31230}. Note=Enriched in secretory vesicles of pancreatic alpha cells and secreted from the pancreas in response to low glucose levels (By similarity). Se…
Q12904	161	AIMP1	AIMP1_HUMAN Aminoacyl tRNA synthase complex-interacting multifunctional protein 1 OS=Homo sapiens OX=9606 GN=AIMP1 PE=1 SV=2	IGC#IITAR|IGC#IITAR	2|1	0.00607|0.0062	0.00613	9e-05	3	2	0.609265		SUBCELLULAR LOCATION: Nucleus {ECO:0000269|PubMed:14500886}. Cytoplasm, cytosol {ECO:0000269|PubMed:19289464}. Secreted {ECO:0000269|PubMed:10850427}. Endoplasmic reticulum {ECO:0000250|UniProtKB:P31230}. Golgi apparatus {ECO:0000250|UniProtKB:P31230}. Note=Enriched in secretory vesicles of pancreatic alpha cells and secreted from the pancreas in response to low glucose levels (By similarity). Se…
Q13155	306	AIMP2	AIMP2_HUMAN Aminoacyl tRNA synthase complex-interacting multifunctional protein 2 OS=Homo sapiens OX=9606 GN=AIMP2 PE=1 SV=2	SC#ENLAPFNTALK|SC#ENLAPFNTALK	1|1	0.76|1.66	1.21	0.6364	2	2	54.7511		SUBCELLULAR LOCATION: Cytoplasm, cytosol {ECO:0000269|PubMed:19289464}. Nucleus {ECO:0000250|UniProtKB:Q8R010}. Note=Following DNA damage, dissociates from the aminoacyl-tRNA synthase complex and translocates from the cytoplasm to the nucleus. {ECO:0000250|UniProtKB:Q8R010}.
Q13155	143	AIMP2	AIMP2_HUMAN Aminoacyl tRNA synthase complex-interacting multifunctional protein 2 OS=Homo sapiens OX=9606 GN=AIMP2 PE=1 SV=2	LLC#EHFR|LLC#EHFR	3|3	0.96|0.04	0.5	0.65054	6	2	33.3333		SUBCELLULAR LOCATION: Cytoplasm, cytosol {ECO:0000269|PubMed:19289464}. Nucleus {ECO:0000250|UniProtKB:Q8R010}. Note=Following DNA damage, dissociates from the aminoacyl-tRNA synthase complex and translocates from the cytoplasm to the nucleus. {ECO:0000250|UniProtKB:Q8R010}.
Q13155	23	AIMP2	AIMP2_HUMAN Aminoacyl tRNA synthase complex-interacting multifunctional protein 2 OS=Homo sapiens OX=9606 GN=AIMP2 PE=1 SV=2	VELPTC#MYR|VELPTC#MYR	2|3	0.245|0.38	0.3125	0.09546	5	2	23.8095		SUBCELLULAR LOCATION: Cytoplasm, cytosol {ECO:0000269|PubMed:19289464}. Nucleus {ECO:0000250|UniProtKB:Q8R010}. Note=Following DNA damage, dissociates from the aminoacyl-tRNA synthase complex and translocates from the cytoplasm to the nucleus. {ECO:0000250|UniProtKB:Q8R010}.
Q13155	205	AIMP2	AIMP2_HUMAN Aminoacyl tRNA synthase complex-interacting multifunctional protein 2 OS=Homo sapiens OX=9606 GN=AIMP2 PE=1 SV=2	FSIQTMC#PIEGEGNIAR|FSIQTMC#PIEGEGNIAR	1|1	0.00098|0.00098	0.00098	0	2	2	0		SUBCELLULAR LOCATION: Cytoplasm, cytosol {ECO:0000269|PubMed:19289464}. Nucleus {ECO:0000250|UniProtKB:Q8R010}. Note=Following DNA damage, dissociates from the aminoacyl-tRNA synthase complex and translocates from the cytoplasm to the nucleus. {ECO:0000250|UniProtKB:Q8R010}.
O00170	208	AIP	AIP_HUMAN AH receptor-interacting protein OS=Homo sapiens OX=9606 GN=AIP PE=1 SV=2	|YYDAIAC#LK	|1	|0.88	0.88	NA	1	1	46.8085		SUBCELLULAR LOCATION: Cytoplasm.
O00170	254	AIP	AIP_HUMAN AH receptor-interacting protein OS=Homo sapiens OX=9606 GN=AIP PE=1 SV=2	LVVEEYYEVLDHC#SSILNK|LVVEEYYEVLDHC#SSILNK	2|4	0.875|0.64	0.7575	0.16617	6	2	43.101		SUBCELLULAR LOCATION: Cytoplasm.
Q96IF1	270	AJUBA	AJUBA_HUMAN LIM domain-containing protein ajuba OS=Homo sapiens OX=9606 GN=AJUBA PE=1 SV=1	HSVTGYGDC#AVGAR|HSVTGYGDC#AVGAR	2|2	0.385|0.135	0.26	0.17678	4	2	20.6349		SUBCELLULAR LOCATION: Cytoplasm, cytoskeleton. Cell membrane. Cell junction. Nucleus. Cytoplasm, cytoskeleton, microtubule organizing center, centrosome. Cytoplasm, P-body. Note=Shuttles between the cytoplasm and the nucleus. Localizes on centrosomes during G2-M phase. Preferentially co- localizes with cadherin-adhesive complexes at sites of cell-cell contacts. Colocalizes with GFI1 in the nucleu…
Q96IF1	158	AJUBA	AJUBA_HUMAN LIM domain-containing protein ajuba OS=Homo sapiens OX=9606 GN=AJUBA PE=1 SV=1	GSLLLDGAGAGGAGGSRPC#SNR|GSLLLDGAGAGGAGGSRPC#SNR	1|1	0.00098|0.00098	0.00098	0	2	2	0		SUBCELLULAR LOCATION: Cytoplasm, cytoskeleton. Cell membrane. Cell junction. Nucleus. Cytoplasm, cytoskeleton, microtubule organizing center, centrosome. Cytoplasm, P-body. Note=Shuttles between the cytoplasm and the nucleus. Localizes on centrosomes during G2-M phase. Preferentially co- localizes with cadherin-adhesive complexes at sites of cell-cell contacts. Colocalizes with GFI1 in the nucleu…
P00568	187	AK1	KAD1_HUMAN Adenylate kinase isoenzyme 1 OS=Homo sapiens OX=9606 GN=AK1 PE=1 SV=3	KVNAEGSVDSVFSQVC#THLDALK VNAEGSVDSVFSQVC#THLDALK|KVNAEGSVDSVFSQVC#THLDALK VNAEGSVDSVFSQVC#THLDALK	4|3	0.135|0.13	0.1325	0.00354	7	2	11.6998		SUBCELLULAR LOCATION: Cytoplasm.
P54819	92	AK2	KAD2_HUMAN Adenylate kinase 2, mitochondrial OS=Homo sapiens OX=9606 GN=AK2 PE=1 SV=2	NLETPLC#K|NLETPLC#K	2|2	0.035|0.05549	0.04525	0.01449	4	2	4.32911	Disulfide bond	SUBCELLULAR LOCATION: Mitochondrion intermembrane space {ECO:0000255|HAMAP-Rule:MF_03168}.	Ontology_term=ECO:0000255,ECO:0000269;evidence=ECO:0000255|HAMAP-Rule:MF_03168,ECO:0000269|Ref.17
Q92667	376	AKAP1	AKAP1_HUMAN A-kinase anchor protein 1, mitochondrial OS=Homo sapiens OX=9606 GN=AKAP1 PE=1 SV=1	|VC#QASQLQGQK	|2	|0.89	0.89	NA	2	1	47.0899		SUBCELLULAR LOCATION: Mitochondrion outer membrane {ECO:0000250|UniProtKB:O08715}.
Q92667	64	AKAP1	AKAP1_HUMAN A-kinase anchor protein 1, mitochondrial OS=Homo sapiens OX=9606 GN=AKAP1 PE=1 SV=1	ADPAIKEPLPVEDVC#PK|ADPAIKEPLPVEDVC#PK	1|1	0.00098|1.04	0.52049	0.7347	2	2	34.2317		SUBCELLULAR LOCATION: Mitochondrion outer membrane {ECO:0000250|UniProtKB:O08715}.
Q92667	102	AKAP1	AKAP1_HUMAN A-kinase anchor protein 1, mitochondrial OS=Homo sapiens OX=9606 GN=AKAP1 PE=1 SV=1	LPAEPPALLQTHPPC#R|LPAEPPALLQTHPPC#R	4|7	0.17|0.04	0.105	0.09192	11	2	9.50226		SUBCELLULAR LOCATION: Mitochondrion outer membrane {ECO:0000250|UniProtKB:O08715}.
O43572	242	AKAP10	AKA10_HUMAN A-kinase anchor protein 10, mitochondrial OS=Homo sapiens OX=9606 GN=AKAP10 PE=1 SV=2	|TNSTQNHLLLSQEC#DSAHSLR	|1	|1.65	1.65	NA	1	1	62.2642		SUBCELLULAR LOCATION: Mitochondrion {ECO:0000269|PubMed:11248059}. Membrane {ECO:0000269|PubMed:11248059}. Cytoplasm {ECO:0000269|PubMed:11248059}. Note=Predominantly mitochondrial but also membrane associated and cytoplasmic.
Q02952	1479	AKAP12	AKA12_HUMAN A-kinase anchor protein 12 OS=Homo sapiens OX=9606 GN=AKAP12 PE=1 SV=4	SSEKNEDFAAHPGEDAVPTGPDC#QAK|SSEKNEDFAAHPGEDAVPTGPDC#QAK	1|1	0.08|0.34	0.21	0.18385	2	2	17.3554		SUBCELLULAR LOCATION: Cytoplasm, cell cortex {ECO:0000305}. Cytoplasm, cytoskeleton {ECO:0000305}. Membrane {ECO:0000305}; Lipid-anchor {ECO:0000305}. Note=May be part of the cortical cytoskeleton.
Q12802	732	AKAP13	AKP13_HUMAN A-kinase anchor protein 13 OS=Homo sapiens OX=9606 GN=AKAP13 PE=1 SV=2	ADFC#PFK|	1|	6.99|	6.99	NA	1	1	87.4844		SUBCELLULAR LOCATION: Cytoplasm, cytosol {ECO:0000269|PubMed:11546812, ECO:0000269|PubMed:9891067}. Cytoplasm {ECO:0000269|PubMed:9627117}. Cytoplasm, cell cortex {ECO:0000269|PubMed:11546812}. Nucleus {ECO:0000269|PubMed:9627117}. Membrane {ECO:0000269|PubMed:11696353, ECO:0000269|PubMed:9891067}; Peripheral membrane protein {ECO:0000269|PubMed:11696353, ECO:0000305|PubMed:9891067}. Note=Colocal…
Q12802	1677	AKAP13	AKP13_HUMAN A-kinase anchor protein 13 OS=Homo sapiens OX=9606 GN=AKAP13 PE=1 SV=2	QQGFNYC#TSAISSPLTK|	1|	1.65|	1.65	NA	1	1	62.2642		SUBCELLULAR LOCATION: Cytoplasm, cytosol {ECO:0000269|PubMed:11546812, ECO:0000269|PubMed:9891067}. Cytoplasm {ECO:0000269|PubMed:9627117}. Cytoplasm, cell cortex {ECO:0000269|PubMed:11546812}. Nucleus {ECO:0000269|PubMed:9627117}. Membrane {ECO:0000269|PubMed:11696353, ECO:0000269|PubMed:9891067}; Peripheral membrane protein {ECO:0000269|PubMed:11696353, ECO:0000305|PubMed:9891067}. Note=Colocal…
Q12802	1276	AKAP13	AKP13_HUMAN A-kinase anchor protein 13 OS=Homo sapiens OX=9606 GN=AKAP13 PE=1 SV=2	|AAGALLTEGEAC#HMSLSSPELGPLTK	|2	|0.27549	0.27549	NA	2	1	21.5988		SUBCELLULAR LOCATION: Cytoplasm, cytosol {ECO:0000269|PubMed:11546812, ECO:0000269|PubMed:9891067}. Cytoplasm {ECO:0000269|PubMed:9627117}. Cytoplasm, cell cortex {ECO:0000269|PubMed:11546812}. Nucleus {ECO:0000269|PubMed:9627117}. Membrane {ECO:0000269|PubMed:11696353, ECO:0000269|PubMed:9891067}; Peripheral membrane protein {ECO:0000269|PubMed:11696353, ECO:0000305|PubMed:9891067}. Note=Colocal…
Q12802	709	AKAP13	AKP13_HUMAN A-kinase anchor protein 13 OS=Homo sapiens OX=9606 GN=AKAP13 PE=1 SV=2	QPSSQDPPDASHC#EDPQAHTVTSDPVR|QPSSQDPPDASHC#EDPQAHTVTSDPVR	4|3	0.095|0.16	0.1275	0.04596	7	2	11.3082		SUBCELLULAR LOCATION: Cytoplasm, cytosol {ECO:0000269|PubMed:11546812, ECO:0000269|PubMed:9891067}. Cytoplasm {ECO:0000269|PubMed:9627117}. Cytoplasm, cell cortex {ECO:0000269|PubMed:11546812}. Nucleus {ECO:0000269|PubMed:9627117}. Membrane {ECO:0000269|PubMed:11696353, ECO:0000269|PubMed:9891067}; Peripheral membrane protein {ECO:0000269|PubMed:11696353, ECO:0000305|PubMed:9891067}. Note=Colocal…
Q12802	1666	AKAP13	AKP13_HUMAN A-kinase anchor protein 13 OS=Homo sapiens OX=9606 GN=AKAP13 PE=1 SV=2	|MFDQQIC#HR	|1	|0.11	0.11	NA	1	1	9.90991		SUBCELLULAR LOCATION: Cytoplasm, cytosol {ECO:0000269|PubMed:11546812, ECO:0000269|PubMed:9891067}. Cytoplasm {ECO:0000269|PubMed:9627117}. Cytoplasm, cell cortex {ECO:0000269|PubMed:11546812}. Nucleus {ECO:0000269|PubMed:9627117}. Membrane {ECO:0000269|PubMed:11696353, ECO:0000269|PubMed:9891067}; Peripheral membrane protein {ECO:0000269|PubMed:11696353, ECO:0000305|PubMed:9891067}. Note=Colocal…
Q12802	2101	AKAP13	AKP13_HUMAN A-kinase anchor protein 13 OS=Homo sapiens OX=9606 GN=AKAP13 PE=1 SV=2	FC#GQHNQSVNYFK|	1|	0.06|	0.06	NA	1	1	5.66038		SUBCELLULAR LOCATION: Cytoplasm, cytosol {ECO:0000269|PubMed:11546812, ECO:0000269|PubMed:9891067}. Cytoplasm {ECO:0000269|PubMed:9627117}. Cytoplasm, cell cortex {ECO:0000269|PubMed:11546812}. Nucleus {ECO:0000269|PubMed:9627117}. Membrane {ECO:0000269|PubMed:11696353, ECO:0000269|PubMed:9891067}; Peripheral membrane protein {ECO:0000269|PubMed:11696353, ECO:0000305|PubMed:9891067}. Note=Colocal…
Q02040	563	AKAP17A	AK17A_HUMAN A-kinase anchor protein 17A OS=Homo sapiens OX=9606 GN=AKAP17A PE=1 SV=2	GIPAC#EQNVSR|GIPAC#EQNVSR	1|1	0.11|2.32	1.215	1.56271	2	2	54.8533		SUBCELLULAR LOCATION: Nucleus speckle {ECO:0000269|PubMed:16982639, ECO:0000269|PubMed:19840947}.
O43823	173	AKAP8	AKAP8_HUMAN A-kinase anchor protein 8 OS=Homo sapiens OX=9606 GN=AKAP8 PE=1 SV=1	NGSFGGQYSEC#RDPAR|	1|	0.23|	0.23	NA	1	1	18.6992		SUBCELLULAR LOCATION: Nucleus {ECO:0000269|PubMed:19277197}. Nucleus matrix {ECO:0000269|PubMed:10601332}. Nucleus, nucleolus {ECO:0000269|PubMed:26683827}. Cytoplasm {ECO:0000250|UniProtKB:Q9DBR0}. Note=Associated with the nuclear matrix in interphase and redistributes mostly to chromatin at mitosis. However, mitotic chromatin localization has been questioned. Upon nuclear reassembly at the end …
Q9ULX6	211	AKAP8L	AKP8L_HUMAN A-kinase anchor protein 8-like OS=Homo sapiens OX=9606 GN=AKAP8L PE=1 SV=4	|GQC#MSGASR	|1	|0.12	0.12	NA	1	1	10.7143		SUBCELLULAR LOCATION: Nucleus {ECO:0000269|PubMed:10748171, ECO:0000269|PubMed:10761695}. Nucleus matrix {ECO:0000269|PubMed:11034899, ECO:0000269|PubMed:16391387}. Nucleus speckle {ECO:0000269|PubMed:17594903}. Nucleus, PML body {ECO:0000269|PubMed:11884601}. Cytoplasm {ECO:0000269|PubMed:10748171}. Note=Colocalizes with PRPF40A in the nuclear matrix (PubMed:16391387). Nuclear at steady state bu…
Q99996	2765	AKAP9	AKAP9_HUMAN A-kinase anchor protein 9 OS=Homo sapiens OX=9606 GN=AKAP9 PE=1 SV=4	AC#MFEPLPIK|AC#MFEPLPIK	1|1	0.5|0.17	0.335	0.23335	2	2	25.0936		SUBCELLULAR LOCATION: Golgi apparatus {ECO:0000269|PubMed:15047863, ECO:0000269|PubMed:19242490, ECO:0000269|PubMed:25217626, ECO:0000269|PubMed:27666745}. Cytoplasm {ECO:0000269|PubMed:9915845}. Cytoplasm, cytoskeleton, microtubule organizing center, centrosome {ECO:0000269|PubMed:12270714, ECO:0000269|PubMed:14654843, ECO:0000269|PubMed:25657325, ECO:0000269|PubMed:29162697, ECO:0000269|PubMed:…
P14550	46	AKR1A1	AK1A1_HUMAN Aldo-keto reductase family 1 member A1 OS=Homo sapiens OX=9606 GN=AKR1A1 PE=1 SV=3	HIDC#AAIYGNEPEIGEALK HIDC#AAIYGNEPEIGEALKEDVGPGK|HIDC#AAIYGNEPEIGEALK HIDC#AAIYGNEPEIGEALKEDVGPGK	6|6	0.69|0.255	0.4725	0.30759	12	2	32.0883		SUBCELLULAR LOCATION: Cytoplasm, cytosol {ECO:0000250|UniProtKB:Q9JII6}. Apical cell membrane {ECO:0000250|UniProtKB:Q9JII6}.
P14550	260	AKR1A1	AK1A1_HUMAN Aldo-keto reductase family 1 member A1 OS=Homo sapiens OX=9606 GN=AKR1A1 PE=1 SV=3	VIC#IPK|VIC#IPK	1|1	0.09|0.18	0.135	0.06364	2	2	11.8943		SUBCELLULAR LOCATION: Cytoplasm, cytosol {ECO:0000250|UniProtKB:Q9JII6}. Apical cell membrane {ECO:0000250|UniProtKB:Q9JII6}.
P14550	134	AKR1A1	AK1A1_HUMAN Aldo-keto reductase family 1 member A1 OS=Homo sapiens OX=9606 GN=AKR1A1 PE=1 SV=3	NADGTIC#YDSTHYK|NADGTIC#YDSTHYK	1|1	0.00098|0.00098	0.00098	0	2	2	0		SUBCELLULAR LOCATION: Cytoplasm, cytosol {ECO:0000250|UniProtKB:Q9JII6}. Apical cell membrane {ECO:0000250|UniProtKB:Q9JII6}.
P15121	81	AKR1B1	ALDR_HUMAN Aldo-keto reductase family 1 member B1 OS=Homo sapiens OX=9606 GN=AKR1B1 PE=1 SV=3	LWC#TYHEK|LWC#TYHEK	10|6	0.865|0.265	0.565	0.42426	16	2	36.1022		SUBCELLULAR LOCATION: Cytoplasm.
P15121	45	AKR1B1	ALDR_HUMAN Aldo-keto reductase family 1 member B1 OS=Homo sapiens OX=9606 GN=AKR1B1 PE=1 SV=3	C#AHVYQNENEVGVAIQEK HIDC#AHVYQNENEVGVAIQEK IDC#AHVYQNENEVGVAIQEK|C#AHVYQNENEVGVAIQEK HIDC#AHVYQNENEVGVAIQEK IDC#AHVYQNENEVGVAIQEK	23|28	0.02|0.04	0.03	0.01414	51	2	2.91262		SUBCELLULAR LOCATION: Cytoplasm.
P15121	200	AKR1B1	ALDR_HUMAN Aldo-keto reductase family 1 member B1 OS=Homo sapiens OX=9606 GN=AKR1B1 PE=1 SV=3	LIQYC#QSK|LIQYC#QSK	3|1	0.01|0.02	0.015	0.00707	4	2	1.47783		SUBCELLULAR LOCATION: Cytoplasm.
P15121	187	AKR1B1	ALDR_HUMAN Aldo-keto reductase family 1 member B1 OS=Homo sapiens OX=9606 GN=AKR1B1 PE=1 SV=3	YKPAVNQIEC#HPYLTQEK PAVNQIEC#HPYLTQEK|YKPAVNQIEC#HPYLTQEK PAVNQIEC#HPYLTQEK	30|24	0.00973|0.00859	0.00916	0.00081	54	2	0.907686		SUBCELLULAR LOCATION: Cytoplasm.
O60218	45	AKR1B10	AK1BA_HUMAN Aldo-keto reductase family 1 member B10 OS=Homo sapiens OX=9606 GN=AKR1B10 PE=1 SV=2	C#AYVYQNEHEVGEAIQEK HIDC#AYVYQNEHEVGEAIQEK IDC#AYVYQNEHEVGEAIQEK|C#AYVYQNEHEVGEAIQEK HIDC#AYVYQNEHEVGEAIQEK IDC#AYVYQNEHEVGEAIQEK	21|19	0.03|0.1	0.065	0.0495	40	2	6.10329		SUBCELLULAR LOCATION: Lysosome {ECO:0000269|PubMed:21585341}. Secreted {ECO:0000269|PubMed:21585341}. Note=Secreted through a lysosome-mediated non-classical pathway.
O60218	299	AKR1B10	AK1BA_HUMAN Aldo-keto reductase family 1 member B10 OS=Homo sapiens OX=9606 GN=AKR1B10 PE=1 SV=2	AC#NVLQSSHLEDYPFNAEY|AC#NVLQSSHLEDYPFNAEY	2|4	0.095|0.19	0.1425	0.06718	6	2	12.4726	Mutagenesis	SUBCELLULAR LOCATION: Lysosome {ECO:0000269|PubMed:21585341}. Secreted {ECO:0000269|PubMed:21585341}. Note=Secreted through a lysosome-mediated non-classical pathway.	Note=Decreased affinity and reduced catalytic activity towards 4-hydroxynonenal. C->S;Ontology_term=ECO:0000269;evidence=ECO:0000269|PubMed:19013440;Dbxref=PMID:19013440
Q04828	87	AKR1C1	AK1C1_HUMAN Aldo-keto reductase family 1 member C1 OS=Homo sapiens OX=9606 GN=AKR1C1 PE=1 SV=1	LWC#NSHRPELVRPALER|LWC#NSHRPELVRPALER	2|1	0.05549|0.16	0.10775	0.0739	3	2	9.72692		SUBCELLULAR LOCATION: Cytoplasm.
P52895	145	AKR1C2	AK1C2_HUMAN Aldo-keto reductase family 1 member C2 OS=Homo sapiens OX=9606 GN=AKR1C2 PE=1 SV=3	ILFDTVDLC#ATWEAMEK|ILFDTVDLC#ATWEAMEK	9|10	0.18|0.26	0.22	0.05657	19	2	18.0328		SUBCELLULAR LOCATION: Cytoplasm {ECO:0000305}.
P42330	145	AKR1C3	AK1C3_HUMAN Aldo-keto reductase family 1 member C3 OS=Homo sapiens OX=9606 GN=AKR1C3 PE=1 SV=4	|VIFDIVDLC#TTWEAMEK	|1	|1.34	1.34	NA	1	1	57.265		SUBCELLULAR LOCATION: Cytoplasm.
Q96B36	61	AKT1S1	AKTS1_HUMAN Proline-rich AKT1 substrate 1 OS=Homo sapiens OX=9606 GN=AKT1S1 PE=1 SV=1	C#LHDIALAHR|C#LHDIALAHR	6|5	0.04|0.03	0.035	0.00707	11	2	3.38164		SUBCELLULAR LOCATION: Cytoplasm, cytosol {ECO:0000250}. Note=Found in the cytosolic fraction of the brain. {ECO:0000250}.
P31751	60	AKT2	AKT2_HUMAN RAC-beta serine/threonine-protein kinase OS=Homo sapiens OX=9606 GN=AKT2 PE=1 SV=2	ERPEAPDQTLPPLNNFSVAEC#QLMK|ERPEAPDQTLPPLNNFSVAEC#QLMK	2|1	0.14|0.28	0.21	0.09899	3	2	17.3554	Disulfide bond	SUBCELLULAR LOCATION: Cytoplasm. Nucleus. Cell membrane; Peripheral membrane protein. Early endosome {ECO:0000250|UniProtKB:Q60823}. Note=Localizes within both nucleus and cytoplasm of proliferative primary myoblasts and mostly within the nucleus of differentiated primary myoblasts. By virtue of the N-terminal PH domain, is recruited to sites of the plasma membrane containing increased PI(3,4,5)P…	Ontology_term=ECO:0000250;evidence=ECO:0000250
P31751	77	AKT2	AKT2_HUMAN RAC-beta serine/threonine-protein kinase OS=Homo sapiens OX=9606 GN=AKT2 PE=1 SV=2	C#LQWTTVIER|C#LQWTTVIER	3|2	0.08|0.065	0.0725	0.01061	5	2	6.75991	Disulfide bond	SUBCELLULAR LOCATION: Cytoplasm. Nucleus. Cell membrane; Peripheral membrane protein. Early endosome {ECO:0000250|UniProtKB:Q60823}. Note=Localizes within both nucleus and cytoplasm of proliferative primary myoblasts and mostly within the nucleus of differentiated primary myoblasts. By virtue of the N-terminal PH domain, is recruited to sites of the plasma membrane containing increased PI(3,4,5)P…	Ontology_term=ECO:0000250;evidence=ECO:0000250
Q13740	392	ALCAM	CD166_HUMAN CD166 antigen OS=Homo sapiens OX=9606 GN=ALCAM PE=1 SV=2	SSPSFSSLHYQDAGNYVC#ETALQEVEGLK|	1|	0.81|	0.81	NA	1	1	44.7514	Disulfide bond	SUBCELLULAR LOCATION: Cell membrane {ECO:0000269|PubMed:15048703, ECO:0000269|PubMed:15294938, ECO:0000269|PubMed:16352806, ECO:0000269|PubMed:23169771, ECO:0000269|PubMed:24740813, ECO:0000269|PubMed:24945728, ECO:0000269|PubMed:7760007}; Single-pass type I membrane protein {ECO:0000305}. Cell projection, axon {ECO:0000250|UniProtKB:Q61490}. Cell projection, dendrite {ECO:0000250|UniProtKB:Q6149…	Ontology_term=ECO:0000255;evidence=ECO:0000255|PROSITE-ProRule:PRU00114
Q13740	435	ALCAM	CD166_HUMAN CD166 antigen OS=Homo sapiens OX=9606 GN=ALCAM PE=1 SV=2	TIIC#HVEGFPK|TIIC#HVEGFPK	4|2	0.15049|0.06549	0.10799	0.0601	6	2	9.74648	Disulfide bond	SUBCELLULAR LOCATION: Cell membrane {ECO:0000269|PubMed:15048703, ECO:0000269|PubMed:15294938, ECO:0000269|PubMed:16352806, ECO:0000269|PubMed:23169771, ECO:0000269|PubMed:24740813, ECO:0000269|PubMed:24945728, ECO:0000269|PubMed:7760007}; Single-pass type I membrane protein {ECO:0000305}. Cell projection, axon {ECO:0000250|UniProtKB:Q61490}. Cell projection, dendrite {ECO:0000250|UniProtKB:Q6149…	Ontology_term=ECO:0000255;evidence=ECO:0000255|PROSITE-ProRule:PRU00114
Q8IZ83	350	ALDH16A1	A16A1_HUMAN Aldehyde dehydrogenase family 16 member A1 OS=Homo sapiens OX=9606 GN=ALDH16A1 PE=1 SV=2	GAAAC#DLVQR|GAAAC#DLVQR	1|1	1.09|2.71	1.9	1.14551	2	2	65.5172
Q8IZ83	472	ALDH16A1	A16A1_HUMAN Aldehyde dehydrogenase family 16 member A1 OS=Homo sapiens OX=9606 GN=ALDH16A1 PE=1 SV=2	ESGC#SWHGGPDGLYEYLRPSGTPAR|ESGC#SWHGGPDGLYEYLRPSGTPAR	2|4	0.445|0.725	0.585	0.19799	6	2	36.9085
P54886	584	ALDH18A1	P5CS_HUMAN Delta-1-pyrroline-5-carboxylate synthase OS=Homo sapiens OX=9606 GN=ALDH18A1 PE=1 SV=2	GIPVMGHSEGIC#HMYVDSEASVDK|GIPVMGHSEGIC#HMYVDSEASVDK	3|4	1.6|0.715	1.1575	0.62579	7	2	53.6501		SUBCELLULAR LOCATION: Mitochondrion inner membrane {ECO:0000269|PubMed:26297558, ECO:0000269|PubMed:26320891}.
P00352	50	ALDH1A1	AL1A1_HUMAN Retinal dehydrogenase 1 OS=Homo sapiens OX=9606 GN=ALDH1A1 PE=1 SV=2	LC#QVEEGDKEDVDK ELC#QVEEGDKEDVDK EELC#QVEEGDKEDVDK NPATEEELC#QVEEGDKEDVDK VFNPATEEELC#QVEEGDKEDVDK KFPVFNPATEEELC#QVEEGDKEDVDK C#QVEEGDKEDVDK KFPVFNPATEEELC#QVEEGDK FPVFNPATEEELC#QVEEGDKEDVDK|LC#QVEEGDKEDVDK ELC#QVEEGDKEDVDK EELC#QVEEGDKEDVDK NPATEEELC#QVEEGDKEDVDK FNPATEEELC#QVEEGDKEDVDK KFPVFNPATEEELC#QVEEGDKEDVDK KFPVFNPATEEELC#QVEEGDK FPVFNPATEEELC#QVEEGDKEDVDK	39|35	0.06|0.09	0.075	0.02121	74	2	6.97674		SUBCELLULAR LOCATION: Cytoplasm, cytosol {ECO:0000250|UniProtKB:P48644}.
P00352	133	ALDH1A1	AL1A1_HUMAN Retinal dehydrogenase 1 OS=Homo sapiens OX=9606 GN=ALDH1A1 PE=1 SV=2	YC#AGWADK YC#AGWADKIQGR|YC#AGWADK YC#AGWADKIQGR	8|7	0.13|0.00348	0.06674	0.08946	15	2	6.25644		SUBCELLULAR LOCATION: Cytoplasm, cytosol {ECO:0000250|UniProtKB:P48644}.
P00352	126	ALDH1A1	AL1A1_HUMAN Retinal dehydrogenase 1 OS=Homo sapiens OX=9606 GN=ALDH1A1 PE=1 SV=2	LYSNAYLNDLAGC#IK|LYSNAYLNDLAGC#IK	11|11	0.04|0.07	0.055	0.02121	22	2	5.21327		SUBCELLULAR LOCATION: Cytoplasm, cytosol {ECO:0000250|UniProtKB:P48644}.
P00352	186	ALDH1A1	AL1A1_HUMAN Retinal dehydrogenase 1 OS=Homo sapiens OX=9606 GN=ALDH1A1 PE=1 SV=2	IGPALSC#GNTVVVK IGPALSC#GNTVVVKPAEQTPLTALHVASLIK|IGPALSC#GNTVVVK IGPALSC#GNTVVVKPAEQTPLTALHVASLIK	9|11	0.01|0.02	0.015	0.00707	20	2	1.47783		SUBCELLULAR LOCATION: Cytoplasm, cytosol {ECO:0000250|UniProtKB:P48644}.
P00352	370	ALDH1A1	AL1A1_HUMAN Retinal dehydrogenase 1 OS=Homo sapiens OX=9606 GN=ALDH1A1 PE=1 SV=2	LEC#GGGPWGNK|LEC#GGGPWGNK	6|7	0.006|0.00434	0.00517	0.00117	13	2	0.514341		SUBCELLULAR LOCATION: Cytoplasm, cytosol {ECO:0000250|UniProtKB:P48644}.
P47895	52	ALDH1A3	AL1A3_HUMAN Aldehyde dehydrogenase family 1 member A3 OS=Homo sapiens OX=9606 GN=ALDH1A3 PE=1 SV=2	FATC#NPSTR|FATC#NPSTR	1|2	0.45|0.605	0.5275	0.1096	3	2	34.5336		SUBCELLULAR LOCATION: Cytoplasm {ECO:0000250|UniProtKB:Q9JHW9}.
P30837	169	ALDH1B1	AL1B1_HUMAN Aldehyde dehydrogenase X, mitochondrial OS=Homo sapiens OX=9606 GN=ALDH1B1 PE=1 SV=3	TIPMDGQHFC#FTR|TIPMDGQHFC#FTR	13|8	0.05|0.19	0.12	0.09899	21	2	10.7143		SUBCELLULAR LOCATION: Mitochondrion matrix.
P30837	386	ALDH1B1	AL1B1_HUMAN Aldehyde dehydrogenase X, mitochondrial OS=Homo sapiens OX=9606 GN=ALDH1B1 PE=1 SV=3	LLC#GGER|LLC#GGER	1|1	0.07|0.05	0.06	0.01414	2	2	5.66038		SUBCELLULAR LOCATION: Mitochondrion matrix.
P05091	66	ALDH2	ALDH2_HUMAN Aldehyde dehydrogenase, mitochondrial OS=Homo sapiens OX=9606 GN=ALDH2 PE=1 SV=2	KTFPTVNPSTGEVIC#QVAEGDKEDVDK|KTFPTVNPSTGEVIC#QVAEGDKEDVDK	2|2	0.77|0.69	0.73	0.05657	4	2	42.1965		SUBCELLULAR LOCATION: Mitochondrion matrix.
P05091	36	ALDH2	ALDH2_HUMAN Aldehyde dehydrogenase, mitochondrial OS=Homo sapiens OX=9606 GN=ALDH2 PE=1 SV=2	C#NQIFINNEWHDAVSR SAAATQAVPAPNQQPEVFC#NQIFINNEWHDAVSR LSAAATQAVPAPNQQPEVFC#NQIFINNEWHDAVSR|C#NQIFINNEWHDAVSR SAAATQAVPAPNQQPEVFC#NQIFINNEWHDAVSR AVPAPNQQPEVFC#NQIFINNEWHDAVSR LSAAATQAVPAPNQQPEVFC#NQIFINNEWHDAVSR	6|6	0.45|0.19	0.32	0.18385	12	2	24.2424		SUBCELLULAR LOCATION: Mitochondrion matrix.
P05091	386	ALDH2	ALDH2_HUMAN Aldehyde dehydrogenase, mitochondrial OS=Homo sapiens OX=9606 GN=ALDH2 PE=1 SV=2	LLC#GGGIAADR|LLC#GGGIAADR	2|2	0.00098|0.015	0.00799	0.00991	4	2	0.792667		SUBCELLULAR LOCATION: Mitochondrion matrix.
P30838	217	ALDH3A1	AL3A1_HUMAN Aldehyde dehydrogenase, dimeric NADP-preferring OS=Homo sapiens OX=9606 GN=ALDH3A1 PE=1 SV=3	SPC#YVDK|SPC#YVDK	2|2	3.325|3.05	3.1875	0.19445	4	2	76.1194		SUBCELLULAR LOCATION: Cytoplasm {ECO:0000250|UniProtKB:P47739}.
P30838	252	ALDH3A1	AL3A1_HUMAN Aldehyde dehydrogenase, dimeric NADP-preferring OS=Homo sapiens OX=9606 GN=ALDH3A1 PE=1 SV=3	FMNSGQTCVAPDYILC#DPSIQNQIVEK|	1|	0.27|	0.27	NA	1	1	21.2598		SUBCELLULAR LOCATION: Cytoplasm {ECO:0000250|UniProtKB:P47739}.
P30838	428	ALDH3A1	AL3A1_HUMAN Aldehyde dehydrogenase, dimeric NADP-preferring OS=Homo sapiens OX=9606 GN=ALDH3A1 PE=1 SV=3	SC#LVRPLMNDEGLK|SC#LVRPLMNDEGLK	20|15	0.03|0.05	0.04	0.01414	35	2	3.84615		SUBCELLULAR LOCATION: Cytoplasm {ECO:0000250|UniProtKB:P47739}.
P51648	425	ALDH3A2	AL3A2_HUMAN Aldehyde dehydrogenase family 3 member A2 OS=Homo sapiens OX=9606 GN=ALDH3A2 PE=1 SV=1	HSFDTFSHQRPC#LLK|HSFDTFSHQRPC#LLK	4|2	0.23|2.71	1.47	1.75362	6	2	59.5142		SUBCELLULAR LOCATION: Microsome membrane {ECO:0000269|PubMed:9133646}; Single-pass membrane protein {ECO:0000305|PubMed:25047030, ECO:0000305|PubMed:9133646}. Endoplasmic reticulum membrane {ECO:0000305|PubMed:9133646}; Single-pass membrane protein {ECO:0000305|PubMed:25047030, ECO:0000305|PubMed:9133646}; Cytoplasmic side {ECO:0000250|UniProtKB:P30839}.
P51648	50	ALDH3A2	AL3A2_HUMAN Aldehyde dehydrogenase family 3 member A2 OS=Homo sapiens OX=9606 GN=ALDH3A2 PE=1 SV=1	EKDILTAIAADLC#K|EKDILTAIAADLC#K	2|3	0.02|0.03	0.025	0.00707	5	2	2.43902		SUBCELLULAR LOCATION: Microsome membrane {ECO:0000269|PubMed:9133646}; Single-pass membrane protein {ECO:0000305|PubMed:25047030, ECO:0000305|PubMed:9133646}. Endoplasmic reticulum membrane {ECO:0000305|PubMed:9133646}; Single-pass membrane protein {ECO:0000305|PubMed:25047030, ECO:0000305|PubMed:9133646}; Cytoplasmic side {ECO:0000250|UniProtKB:P30839}.
P30038	66	ALDH4A1	AL4A1_HUMAN Delta-1-pyrroline-5-carboxylate dehydrogenase, mitochondrial OS=Homo sapiens OX=9606 GN=ALDH4A1 PE=1 SV=3	MEAIPC#VVGDEEVWTSDVQYQVSPFNHGHK|	1|	3.72|	3.72	NA	1	1	78.8136		SUBCELLULAR LOCATION: Mitochondrion matrix.
P51649	110	ALDH5A1	SSDH_HUMAN Succinate-semialdehyde dehydrogenase, mitochondrial OS=Homo sapiens OX=9606 GN=ALDH5A1 PE=1 SV=2	AAYEAFC#R|AAYEAFC#R	1|1	1.68|0.48	1.08	0.84853	2	2	51.9231		SUBCELLULAR LOCATION: Mitochondrion.
Q02252	249	ALDH6A1	MMSA_HUMAN Methylmalonate-semialdehyde dehydrogenase [acylating], mitochondrial OS=Homo sapiens OX=9606 GN=ALDH6A1 PE=1 SV=2	LLQDSGAPDGTLNIIHGQHEAVNFIC#DHPDIK|	1|	0.28|	0.28	NA	1	1	21.875		SUBCELLULAR LOCATION: Mitochondrion.
P49419	522	ALDH7A1	AL7A1_HUMAN Alpha-aminoadipic semialdehyde dehydrogenase OS=Homo sapiens OX=9606 GN=ALDH7A1 PE=1 SV=5	STC#TINYSK|STC#TINYSK	1|2	0.22|0.29	0.255	0.0495	3	2	20.3187		SUBCELLULAR LOCATION: Cytoplasm, cytosol {ECO:0000269|PubMed:20207735}. Nucleus {ECO:0000269|PubMed:20207735}.; SUBCELLULAR LOCATION: [Isoform 1]: Mitochondrion {ECO:0000269|PubMed:20207735}.
P49189	355	ALDH9A1	AL9A1_HUMAN 4-trimethylaminobutyraldehyde dehydrogenase OS=Homo sapiens OX=9606 GN=ALDH9A1 PE=1 SV=3	|VLC#GGDIYVPEDPK	|1	|3.0	3	NA	1	1	75		SUBCELLULAR LOCATION: Cytoplasm, cytosol {ECO:0000250|UniProtKB:Q9JLJ3}.
P49189	267	ALDH9A1	AL9A1_HUMAN 4-trimethylaminobutyraldehyde dehydrogenase OS=Homo sapiens OX=9606 GN=ALDH9A1 PE=1 SV=3	SPLIIFSDC#DMNNAVK|	1|	2.44|	2.44	NA	1	1	70.9302		SUBCELLULAR LOCATION: Cytoplasm, cytosol {ECO:0000250|UniProtKB:Q9JLJ3}.
P49189	45	ALDH9A1	AL9A1_HUMAN 4-trimethylaminobutyraldehyde dehydrogenase OS=Homo sapiens OX=9606 GN=ALDH9A1 PE=1 SV=3	VIATFTC#SGEK|VIATFTC#SGEK	1|1	0.09|0.16	0.125	0.0495	2	2	11.1111		SUBCELLULAR LOCATION: Cytoplasm, cytosol {ECO:0000250|UniProtKB:Q9JLJ3}.
P49189	96	ALDH9A1	AL9A1_HUMAN 4-trimethylaminobutyraldehyde dehydrogenase OS=Homo sapiens OX=9606 GN=ALDH9A1 PE=1 SV=3	EREDEIATMEC#INNGK|EREDEIATMEC#INNGK	7|4	0.16|0.00098	0.08049	0.11244	11	2	7.4494		SUBCELLULAR LOCATION: Cytoplasm, cytosol {ECO:0000250|UniProtKB:Q9JLJ3}.
P04075	178	ALDOA	ALDOA_HUMAN Fructose-bisphosphate aldolase A OS=Homo sapiens OX=9606 GN=ALDOA PE=1 SV=2	YASIC#QQNGIVPIVEPEILPDGDHDLKR YASIC#QQNGIVPIVEPEILPDGDHDLK|YASIC#QQNGIVPIVEPEILPDGDHDLKR YASIC#QQNGIVPIVEPEILPDGDHDLK	10|11	0.24|0.19	0.215	0.03536	21	2	17.6955		SUBCELLULAR LOCATION: Cytoplasm, myofibril, sarcomere, I band. Cytoplasm, myofibril, sarcomere, M line. Note=In skeletal muscle, accumulates around the M line and within the I band, colocalizing with FBP2 on both sides of the Z line in the absence of Ca(2+). {ECO:0000250}.
P04075	202	ALDOA	ALDOA_HUMAN Fructose-bisphosphate aldolase A OS=Homo sapiens OX=9606 GN=ALDOA PE=1 SV=2	C#QYVTEK|C#QYVTEK	2|1	0.37|0.05	0.21	0.22627	3	2	17.3554		SUBCELLULAR LOCATION: Cytoplasm, myofibril, sarcomere, I band. Cytoplasm, myofibril, sarcomere, M line. Note=In skeletal muscle, accumulates around the M line and within the I band, colocalizing with FBP2 on both sides of the Z line in the absence of Ca(2+). {ECO:0000250}.
P04075	240	ALDOA	ALDOA_HUMAN Fructose-bisphosphate aldolase A OS=Homo sapiens OX=9606 GN=ALDOA PE=1 SV=2	ALSDHHIYLEGTLLKPNMVTPGHAC#TQK|ALSDHHIYLEGTLLKPNMVTPGHAC#TQK	7|3	0.29|0.11	0.2	0.12728	10	2	16.6667		SUBCELLULAR LOCATION: Cytoplasm, myofibril, sarcomere, I band. Cytoplasm, myofibril, sarcomere, M line. Note=In skeletal muscle, accumulates around the M line and within the I band, colocalizing with FBP2 on both sides of the Z line in the absence of Ca(2+). {ECO:0000250}.
P04075	73	ALDOA	ALDOA_HUMAN Fructose-bisphosphate aldolase A OS=Homo sapiens OX=9606 GN=ALDOA PE=1 SV=2	VNPC#IGGVILFHETLYQK QLLLTADDRVNPC#IGGVILFHETLYQK|VNPC#IGGVILFHETLYQK QLLLTADDRVNPC#IGGVILFHETLYQK	14|14	0.07|0.06	0.065	0.00707	28	2	6.10329		SUBCELLULAR LOCATION: Cytoplasm, myofibril, sarcomere, I band. Cytoplasm, myofibril, sarcomere, M line. Note=In skeletal muscle, accumulates around the M line and within the I band, colocalizing with FBP2 on both sides of the Z line in the absence of Ca(2+). {ECO:0000250}.
P04075	290	ALDOA	ALDOA_HUMAN Fructose-bisphosphate aldolase A OS=Homo sapiens OX=9606 GN=ALDOA PE=1 SV=2	C#PLLKPWALTFSYGR|C#PLLKPWALTFSYGR	2|1	0.08|0.00098	0.04049	0.05588	3	2	3.89144		SUBCELLULAR LOCATION: Cytoplasm, myofibril, sarcomere, I band. Cytoplasm, myofibril, sarcomere, M line. Note=In skeletal muscle, accumulates around the M line and within the I band, colocalizing with FBP2 on both sides of the Z line in the absence of Ca(2+). {ECO:0000250}.
P04075	339	ALDOA	ALDOA_HUMAN Fructose-bisphosphate aldolase A OS=Homo sapiens OX=9606 GN=ALDOA PE=1 SV=2	ALANSLAC#QGK|ALANSLAC#QGK	6|6	0.01982|0.00504	0.01243	0.01045	12	2	1.22774		SUBCELLULAR LOCATION: Cytoplasm, myofibril, sarcomere, I band. Cytoplasm, myofibril, sarcomere, M line. Note=In skeletal muscle, accumulates around the M line and within the I band, colocalizing with FBP2 on both sides of the Z line in the absence of Ca(2+). {ECO:0000250}.
Q9BT22	194	ALG1	ALG1_HUMAN Chitobiosyldiphosphodolichol beta-mannosyltransferase OS=Homo sapiens OX=9606 GN=ALG1 PE=1 SV=2	LSHLNLC#VTNAMR|LSHLNLC#VTNAMR	1|2	0.04|0.83	0.435	0.55861	3	2	30.3136		SUBCELLULAR LOCATION: Endoplasmic reticulum membrane {ECO:0000305}; Single-pass type II membrane protein {ECO:0000305}.
Q2TAA5	345	ALG11	ALG11_HUMAN GDP-Man:Man(3)GlcNAc(2)-PP-Dol alpha-1,2-mannosyltransferase OS=Homo sapiens OX=9606 GN=ALG11 PE=1 SV=2	|LVLIGGC#R	|1	|0.00098	0.00098	NA	1	1	0		SUBCELLULAR LOCATION: Endoplasmic reticulum {ECO:0000269|PubMed:20080937}. Endoplasmic reticulum membrane {ECO:0000305|PubMed:20080937}; Multi-pass membrane protein {ECO:0000305|PubMed:20080937}.
Q9NP73	86	ALG13	ALG13_HUMAN Putative bifunctional UDP-N-acetylglucosamine transferase and deubiquitinase ALG13 OS=Homo sapiens OX=9606 GN=ALG13 PE=1 SV=2	ADLVISHAGAGSC#LETLEK|ADLVISHAGAGSC#LETLEK	2|2	0.01549|0.03549	0.02549	0.01414	4	2	2.48564		SUBCELLULAR LOCATION: [Isoform 2]: Endoplasmic reticulum {ECO:0000305}. Note=Could be recruited to the cytosolic face of the endoplasmic reticulum membrane through its interaction with ALG14.
Q9H553	59	ALG2	ALG2_HUMAN Alpha-1,3/1,6-mannosyltransferase ALG2 OS=Homo sapiens OX=9606 GN=ALG2 PE=1 SV=1	IWTAHYDPGHC#FAESR|	1|	0.00098|	0.00098	NA	1	1	0		SUBCELLULAR LOCATION: Membrane {ECO:0000305}; Single-pass membrane protein {ECO:0000305}.
Q9BVK2	218	ALG8	ALG8_HUMAN Probable dolichyl pyrophosphate Glc1Man9GlcNAc2 alpha-1,3-glucosyltransferase OS=Homo sapiens OX=9606 GN=ALG8 PE=1 SV=2	SYC#FTANKPDGSIR|SYC#FTANKPDGSIR	2|3	0.375|0.48	0.4275	0.07425	5	2	29.9475		SUBCELLULAR LOCATION: Endoplasmic reticulum membrane {ECO:0000250}; Multi-pass membrane protein {ECO:0000250}.
Q13686	304	ALKBH1	ALKB1_HUMAN Nucleic acid dioxygenase ALKBH1 OS=Homo sapiens OX=9606 GN=ALKBH1 PE=1 SV=2	VLPNPEGEGLPHC#LEAPLPAVLPR|	1|	0.00098|	0.00098	NA	1	1	0	Mutagenesis	SUBCELLULAR LOCATION: Nucleus {ECO:0000269|PubMed:22961808}. Mitochondrion {ECO:0000269|PubMed:17979886, ECO:0000269|PubMed:18603530, ECO:0000269|PubMed:27497299}. Note=Mainly localizes in euchromatin, largely excluded from heterochromatin and nucleoli (By similarity). {ECO:0000250|UniProtKB:P0CB42}.	Note=Does not affect DNA lyase activity. C->A;Ontology_term=ECO:0000269;evidence=ECO:0000269|PubMed:25459764;Dbxref=PMID:25459764
Q6P6C2	267	ALKBH5	ALKB5_HUMAN RNA demethylase ALKBH5 OS=Homo sapiens OX=9606 GN=ALKBH5 PE=1 SV=2	|GSVTVLSGYAADEITHC#IRPQDIK	|2	|0.00098	0.00098	NA	2	1	0		SUBCELLULAR LOCATION: Nucleus speckle {ECO:0000269|PubMed:21264265, ECO:0000269|PubMed:23177736}.
Q96QP1	382	ALPK1	ALPK1_HUMAN Alpha-protein kinase 1 OS=Homo sapiens OX=9606 GN=ALPK1 PE=1 SV=3	LHGETGTVHAASQLC#K|LHGETGTVHAASQLC#K	1|1	0.17|0.00098	0.08549	0.11952	2	2	7.87571		SUBCELLULAR LOCATION: Cytoplasm, cytosol {ECO:0000269|PubMed:30111836}.
Q9Y303	261	AMDHD2	NAGA_HUMAN N-acetylglucosamine-6-phosphate deacetylase OS=Homo sapiens OX=9606 GN=AMDHD2 PE=1 SV=2	C#IFYGMIADGTHTNPAALR|	1|	0.8|	0.8	NA	1	1	44.4444
Q9Y303	18	AMDHD2	NAGA_HUMAN N-acetylglucosamine-6-phosphate deacetylase OS=Homo sapiens OX=9606 GN=AMDHD2 PE=1 SV=2	VLQFTNC#R|VLQFTNC#R	1|1	0.69|0.79	0.74	0.07071	2	2	42.5287
Q01433	107	AMPD2	AMPD2_HUMAN AMP deaminase 2 OS=Homo sapiens OX=9606 GN=AMPD2 PE=1 SV=2	SLPGPAPC#LK|SLPGPAPC#LK	2|1	0.01549|0.02	0.01775	0.00319	3	2	1.74404
Q9H1A4	1074	ANAPC1	APC1_HUMAN Anaphase-promoting complex subunit 1 OS=Homo sapiens OX=9606 GN=ANAPC1 PE=1 SV=1	LLQLC#QR|LLQLC#QR	2|2	0.05549|0.42	0.23774	0.25775	4	2	19.2076
Q9UJX6	557	ANAPC2	ANC2_HUMAN Anaphase-promoting complex subunit 2 OS=Homo sapiens OX=9606 GN=ANAPC2 PE=1 SV=1	FGEAPMHFC#EVMLK|FGEAPMHFC#EVMLK	3|4	0.21|0.1	0.155	0.07778	7	2	13.4199
Q9UJX5	553	ANAPC4	APC4_HUMAN Anaphase-promoting complex subunit 4 OS=Homo sapiens OX=9606 GN=ANAPC4 PE=1 SV=2	SMNQAIC#IPLYR|SMNQAIC#IPLYR	2|3	9.245|2.5	5.8725	4.76944	5	2	85.4493
Q9UJX5	536	ANAPC4	APC4_HUMAN Anaphase-promoting complex subunit 4 OS=Homo sapiens OX=9606 GN=ANAPC4 PE=1 SV=2	MENIIDQC#LQKPADVIGK|MENIIDQC#LQKPADVIGK	3|2	0.35|0.33	0.34	0.01414	5	2	25.3731
Q9UJX5	7	ANAPC4	APC4_HUMAN Anaphase-promoting complex subunit 4 OS=Homo sapiens OX=9606 GN=ANAPC4 PE=1 SV=2	FPTC#FPSFR|FPTC#FPSFR	1|1	0.6|0.06	0.33	0.38184	2	2	24.812
Q9UJX5	732	ANAPC4	APC4_HUMAN Anaphase-promoting complex subunit 4 OS=Homo sapiens OX=9606 GN=ANAPC4 PE=1 SV=2	VSC#VLSSNLR|VSC#VLSSNLR	2|2	0.025|0.04	0.0325	0.01061	4	2	3.1477
Q9UJX3	131	ANAPC7	APC7_HUMAN Anaphase-promoting complex subunit 7 OS=Homo sapiens OX=9606 GN=ANAPC7 PE=1 SV=4	VRPSTGNSASTPQSQC#LPSEIEVK|VRPSTGNSASTPQSQC#LPSEIEVK	3|2	0.36|29.68049	15.0202	20.7327	5	2	93.7579
Q9UJX3	145	ANAPC7	APC7_HUMAN Anaphase-promoting complex subunit 7 OS=Homo sapiens OX=9606 GN=ANAPC7 PE=1 SV=4	MAEC#YTMLK|MAEC#YTMLK	2|3	0.47|0.57	0.52	0.07071	5	2	34.2105
Q9UJX3	347	ANAPC7	APC7_HUMAN Anaphase-promoting complex subunit 7 OS=Homo sapiens OX=9606 GN=ANAPC7 PE=1 SV=4	LFNISDQHAEPWVVSGC#HSFYSK|LFNISDQHAEPWVVSGC#HSFYSK	1|1	0.59|0.43	0.51	0.11314	2	2	33.7748
Q9UJX3	509	ANAPC7	APC7_HUMAN Anaphase-promoting complex subunit 7 OS=Homo sapiens OX=9606 GN=ANAPC7 PE=1 SV=4	NALANQSDC#VLHR|NALANQSDC#VLHR	3|2	0.12|0.02049	0.07025	0.07036	5	2	6.56389
Q9UJX3	259	ANAPC7	APC7_HUMAN Anaphase-promoting complex subunit 7 OS=Homo sapiens OX=9606 GN=ANAPC7 PE=1 SV=4	AISTIC#SLEK|AISTIC#SLEK	1|1	0.06|0.03	0.045	0.02121	2	2	4.30622
Q9P2R3	742	ANKFY1	ANFY1_HUMAN Rabankyrin-5 OS=Homo sapiens OX=9606 GN=ANKFY1 PE=1 SV=2	AIDENNEPTAC#FLIR|AIDENNEPTAC#FLIR	1|1	5.66|9.42	7.54	2.65872	2	2	88.2904		SUBCELLULAR LOCATION: Cytoplasm {ECO:0000269|PubMed:10940552}. Endosome membrane {ECO:0000269|PubMed:10940552}; Peripheral membrane protein {ECO:0000269|PubMed:10940552}. Early endosome {ECO:0000269|PubMed:15328530}. Note=Also associated with endosomal membranes. Localizes to macropinosomes. {ECO:0000269|PubMed:15328530}.
Q9P2R3	843	ANKFY1	ANFY1_HUMAN Rabankyrin-5 OS=Homo sapiens OX=9606 GN=ANKFY1 PE=1 SV=2	QGLTPFAC#AMTFK|	1|	1.32|	1.32	NA	1	1	56.8966		SUBCELLULAR LOCATION: Cytoplasm {ECO:0000269|PubMed:10940552}. Endosome membrane {ECO:0000269|PubMed:10940552}; Peripheral membrane protein {ECO:0000269|PubMed:10940552}. Early endosome {ECO:0000269|PubMed:15328530}. Note=Also associated with endosomal membranes. Localizes to macropinosomes. {ECO:0000269|PubMed:15328530}.
Q9P2R3	499	ANKFY1	ANFY1_HUMAN Rabankyrin-5 OS=Homo sapiens OX=9606 GN=ANKFY1 PE=1 SV=2	WGETPLHTAC#R|	1|	0.28|	0.28	NA	1	1	21.875		SUBCELLULAR LOCATION: Cytoplasm {ECO:0000269|PubMed:10940552}. Endosome membrane {ECO:0000269|PubMed:10940552}; Peripheral membrane protein {ECO:0000269|PubMed:10940552}. Early endosome {ECO:0000269|PubMed:15328530}. Note=Also associated with endosomal membranes. Localizes to macropinosomes. {ECO:0000269|PubMed:15328530}.
Q9P2R3	460	ANKFY1	ANFY1_HUMAN Rabankyrin-5 OS=Homo sapiens OX=9606 GN=ANKFY1 PE=1 SV=2	GSHTDAPDTATGNC#LLQR|GSHTDAPDTATGNC#LLQR	2|1	0.22549|0.18	0.20275	0.03217	3	2	16.8572		SUBCELLULAR LOCATION: Cytoplasm {ECO:0000269|PubMed:10940552}. Endosome membrane {ECO:0000269|PubMed:10940552}; Peripheral membrane protein {ECO:0000269|PubMed:10940552}. Early endosome {ECO:0000269|PubMed:15328530}. Note=Also associated with endosomal membranes. Localizes to macropinosomes. {ECO:0000269|PubMed:15328530}.
Q9P2R3	34	ANKFY1	ANFY1_HUMAN Rabankyrin-5 OS=Homo sapiens OX=9606 GN=ANKFY1 PE=1 SV=2	C#ALLAAQANK|C#ALLAAQANK	2|3	0.045|0.11	0.0775	0.04596	5	2	7.19258		SUBCELLULAR LOCATION: Cytoplasm {ECO:0000269|PubMed:10940552}. Endosome membrane {ECO:0000269|PubMed:10940552}; Peripheral membrane protein {ECO:0000269|PubMed:10940552}. Early endosome {ECO:0000269|PubMed:15328530}. Note=Also associated with endosomal membranes. Localizes to macropinosomes. {ECO:0000269|PubMed:15328530}.
Q9P2R3	995	ANKFY1	ANFY1_HUMAN Rabankyrin-5 OS=Homo sapiens OX=9606 GN=ANKFY1 PE=1 SV=2	VLLTEC#TVDAEAFNLR|VLLTEC#TVDAEAFNLR	1|2	0.00098|0.13549	0.06824	0.09511	3	2	6.38808		SUBCELLULAR LOCATION: Cytoplasm {ECO:0000269|PubMed:10940552}. Endosome membrane {ECO:0000269|PubMed:10940552}; Peripheral membrane protein {ECO:0000269|PubMed:10940552}. Early endosome {ECO:0000269|PubMed:15328530}. Note=Also associated with endosomal membranes. Localizes to macropinosomes. {ECO:0000269|PubMed:15328530}.
Q8IWZ3	1308	ANKHD1	ANKH1_HUMAN Ankyrin repeat and KH domain-containing protein 1 OS=Homo sapiens OX=9606 GN=ANKHD1 PE=1 SV=1	FC#ELLIHR|FC#ELLIHR	4|1	0.075|0.00098	0.03799	0.05234	5	2	3.65996		SUBCELLULAR LOCATION: Cytoplasm {ECO:0000269|PubMed:16098192, ECO:0000269|PubMed:16956752}.
Q8IWZ3	1965	ANKHD1	ANKH1_HUMAN Ankyrin repeat and KH domain-containing protein 1 OS=Homo sapiens OX=9606 GN=ANKHD1 PE=1 SV=1	QLFAC#VPK|QLFAC#VPK	1|1	0.00098|0.00098	0.00098	0	2	2	0		SUBCELLULAR LOCATION: Cytoplasm {ECO:0000269|PubMed:16098192, ECO:0000269|PubMed:16956752}.
Q9P2G1	359	ANKIB1	AKIB1_HUMAN Ankyrin repeat and IBR domain-containing protein 1 OS=Homo sapiens OX=9606 GN=ANKIB1 PE=1 SV=3	GC#WESFLNLK|GC#WESFLNLK	1|2	0.23|0.36	0.295	0.09192	3	2	22.7799	Metal binding		Note=Zinc 1;Ontology_term=ECO:0000255;evidence=ECO:0000255|PROSITE-ProRule:PRU01221
O75179	564	ANKRD17	ANR17_HUMAN Ankyrin repeat domain-containing protein 17 OS=Homo sapiens OX=9606 GN=ANKRD17 PE=1 SV=3	AGADIELGC#STPLMEAAQEGHLELVK|AGADIELGC#STPLMEAAQEGHLELVK	1|1	1.18|2.33	1.755	0.81317	2	2	63.7024		SUBCELLULAR LOCATION: Cytoplasm {ECO:0000269|PubMed:17276651, ECO:0000269|PubMed:22328336}. Nucleus {ECO:0000269|PubMed:17276651, ECO:0000269|PubMed:19150984, ECO:0000269|PubMed:22328336}. Note=Detected around the nucleolus. Localized on chromatin in a cell cycle-dependent manner. {ECO:0000269|PubMed:17276651, ECO:0000269|PubMed:19150984}.
O75179	1746	ANKRD17	ANR17_HUMAN Ankyrin repeat domain-containing protein 17 OS=Homo sapiens OX=9606 GN=ANKRD17 PE=1 SV=3	|GGC#NINAIR	|1	|0.6	0.6	NA	1	1	37.5		SUBCELLULAR LOCATION: Cytoplasm {ECO:0000269|PubMed:17276651, ECO:0000269|PubMed:22328336}. Nucleus {ECO:0000269|PubMed:17276651, ECO:0000269|PubMed:19150984, ECO:0000269|PubMed:22328336}. Note=Detected around the nucleolus. Localized on chromatin in a cell cycle-dependent manner. {ECO:0000269|PubMed:17276651, ECO:0000269|PubMed:19150984}.
O15084	472	ANKRD28	ANR28_HUMAN Serine/threonine-protein phosphatase 6 regulatory ankyrin repeat subunit A OS=Homo sapiens OX=9606 GN=ANKRD28 PE=1 SV=5	GC#TPLHYAATSDTDGK|GC#TPLHYAATSDTDGK	1|1	1.73|5.28	3.505	2.51023	2	2	77.8024		SUBCELLULAR LOCATION: Nucleus, nucleoplasm {ECO:0000269|PubMed:16564677}. Note=Seems to be excluded from nucleoli.
O15084	701	ANKRD28	ANR28_HUMAN Serine/threonine-protein phosphatase 6 regulatory ankyrin repeat subunit A OS=Homo sapiens OX=9606 GN=ANKRD28 PE=1 SV=5	GAVTGHEEC#VDALLQHGAK|GAVTGHEEC#VDALLQHGAK	2|1	0.375|1.13	0.7525	0.53387	3	2	42.9387		SUBCELLULAR LOCATION: Nucleus, nucleoplasm {ECO:0000269|PubMed:16564677}. Note=Seems to be excluded from nucleoli.
O15084	487	ANKRD28	ANR28_HUMAN Serine/threonine-protein phosphatase 6 regulatory ankyrin repeat subunit A OS=Homo sapiens OX=9606 GN=ANKRD28 PE=1 SV=5	C#LEYLLR|C#LEYLLR	1|1	0.00098|0.34	0.17049	0.23972	2	2	14.5657		SUBCELLULAR LOCATION: Nucleus, nucleoplasm {ECO:0000269|PubMed:16564677}. Note=Seems to be excluded from nucleoli.
O15084	85	ANKRD28	ANR28_HUMAN Serine/threonine-protein phosphatase 6 regulatory ankyrin repeat subunit A OS=Homo sapiens OX=9606 GN=ANKRD28 PE=1 SV=5	AVASC#SEEAVQVLLK|AVASC#SEEAVQVLLK	1|1	0.00098|0.00098	0.00098	0	2	2	0		SUBCELLULAR LOCATION: Nucleus, nucleoplasm {ECO:0000269|PubMed:16564677}. Note=Seems to be excluded from nucleoli.
Q6AI12	209	ANKRD40	ANR40_HUMAN Ankyrin repeat domain-containing protein 40 OS=Homo sapiens OX=9606 GN=ANKRD40 PE=1 SV=2	TPESTKPGPVC#QPPVSQSR|TPESTKPGPVC#QPPVSQSR	4|6	0.67|0.37	0.52	0.21213	10	2	34.2105
Q6AI12	358	ANKRD40	ANR40_HUMAN Ankyrin repeat domain-containing protein 40 OS=Homo sapiens OX=9606 GN=ANKRD40 PE=1 SV=2	NAASTLTERPC#YNR|NAASTLTERPC#YNR	3|3	0.11|0.12	0.115	0.00707	6	2	10.3139
Q8NB46	633	ANKRD52	ANR52_HUMAN Serine/threonine-protein phosphatase 6 regulatory ankyrin repeat subunit C OS=Homo sapiens OX=9606 GN=ANKRD52 PE=1 SV=3	GSTEC#VEVLTAHGASALIK|GSTEC#VEVLTAHGASALIK	1|1	0.53|0.06	0.295	0.33234	2	2	22.7799
Q9NQW6	1037	ANLN	ANLN_HUMAN Anillin OS=Homo sapiens OX=9606 GN=ANLN PE=1 SV=2	|INLANC#TSR	|1	|1.65	1.65	NA	1	1	62.2642		SUBCELLULAR LOCATION: Nucleus. Cytoplasm, cytoskeleton. Cytoplasm, cell cortex {ECO:0000269|PubMed:23870127}. Cell projection, bleb {ECO:0000269|PubMed:23870127}. Note=Mainly found in the nucleus during interphase. Colocalizes with cortical F-actin upon nuclear envelope breakdown in mitosis and subsequently concentrates in the area of the prospective contractile ring in anaphase. This pattern per…
Q9NQW6	712	ANLN	ANLN_HUMAN Anillin OS=Homo sapiens OX=9606 GN=ANLN PE=1 SV=2	NNAFPC#QVNIK|NNAFPC#QVNIK	1|4	0.89|0.27	0.58	0.43841	5	2	36.7089		SUBCELLULAR LOCATION: Nucleus. Cytoplasm, cytoskeleton. Cytoplasm, cell cortex {ECO:0000269|PubMed:23870127}. Cell projection, bleb {ECO:0000269|PubMed:23870127}. Note=Mainly found in the nucleus during interphase. Colocalizes with cortical F-actin upon nuclear envelope breakdown in mitosis and subsequently concentrates in the area of the prospective contractile ring in anaphase. This pattern per…
Q4KMQ2	355	ANO6	ANO6_HUMAN Anoctamin-6 OS=Homo sapiens OX=9606 GN=ANO6 PE=1 SV=2	LC#PFWK|	1|	0.00098|	0.00098	NA	1	1	0	Disulfide bond$Disulfide bond$Disulfide bond$Disulfide bond	SUBCELLULAR LOCATION: Cell membrane {ECO:0000269|PubMed:20056604, ECO:0000269|PubMed:21107324, ECO:0000269|PubMed:22075693, ECO:0000269|PubMed:22946059}; Multi-pass membrane protein {ECO:0000269|PubMed:20056604, ECO:0000269|PubMed:21107324, ECO:0000269|PubMed:22075693, ECO:0000269|PubMed:22946059}. Note=Shows an intracellular localization according to PubMed:22075693.	Ontology_term=ECO:0000250;evidence=ECO:0000250|UniProtKB:Q6P9J9$Ontology_term=ECO:0000250;evidence=ECO:0000250|UniProtKB:Q6P9J9$Ontology_term=ECO:0000250;evidence=ECO:0000250|UniProtKB:Q6P9J9$Ontology_term=ECO:0000250;evidence=ECO:0000250|UniProtKB:Q6P9J9
Q4KMQ2	426	ANO6	ANO6_HUMAN Anoctamin-6 OS=Homo sapiens OX=9606 GN=ANO6 PE=1 SV=2	C#THVVINEITQEEER|C#THVVINEITQEEER	4|3	0.00098|0.15	0.07549	0.10537	7	2	7.01913	Disulfide bond	SUBCELLULAR LOCATION: Cell membrane {ECO:0000269|PubMed:20056604, ECO:0000269|PubMed:21107324, ECO:0000269|PubMed:22075693, ECO:0000269|PubMed:22946059}; Multi-pass membrane protein {ECO:0000269|PubMed:20056604, ECO:0000269|PubMed:21107324, ECO:0000269|PubMed:22075693, ECO:0000269|PubMed:22946059}. Note=Shows an intracellular localization according to PubMed:22075693.	Ontology_term=ECO:0000250;evidence=ECO:0000250|UniProtKB:Q6P9J9
Q4KMQ2	105	ANO6	ANO6_HUMAN Anoctamin-6 OS=Homo sapiens OX=9606 GN=ANO6 PE=1 SV=2	QAYESNLIC#HGLQLEATR|QAYESNLIC#HGLQLEATR	2|2	0.07549|0.16549	0.12049	0.06364	4	2	10.7533		SUBCELLULAR LOCATION: Cell membrane {ECO:0000269|PubMed:20056604, ECO:0000269|PubMed:21107324, ECO:0000269|PubMed:22075693, ECO:0000269|PubMed:22946059}; Multi-pass membrane protein {ECO:0000269|PubMed:20056604, ECO:0000269|PubMed:21107324, ECO:0000269|PubMed:22075693, ECO:0000269|PubMed:22946059}. Note=Shows an intracellular localization according to PubMed:22075693.
P39687	87	ANP32A	AN32A_HUMAN Acidic leucine-rich nuclear phosphoprotein 32 family member A OS=Homo sapiens OX=9606 GN=ANP32A PE=1 SV=1	C#PNLTHLNLSGNK|C#PNLTHLNLSGNK	2|6	0.455|0.01	0.2325	0.31466	8	2	18.8641		SUBCELLULAR LOCATION: Nucleus. Cytoplasm. Endoplasmic reticulum. Note=Translocates to the cytoplasm during the process of neuritogenesis (By similarity). Shuttles between nucleus and cytoplasm. {ECO:0000250}.
Q92688	27	ANP32B	AN32B_HUMAN Acidic leucine-rich nuclear phosphoprotein 32 family member B OS=Homo sapiens OX=9606 GN=ANP32B PE=1 SV=1	|ELVLDNC#K	|2	|0.14049	0.14049	NA	2	1	12.3184		SUBCELLULAR LOCATION: [Isoform 1]: Nucleus. Note=Accumulates in the nuclei at the S phase. {ECO:0000250}.; SUBCELLULAR LOCATION: [Isoform 2]: Cytoplasm. Note=Lacks a nuclear localization signal.
Q9BTT0	123	ANP32E	AN32E_HUMAN Acidic leucine-rich nuclear phosphoprotein 32 family member E OS=Homo sapiens OX=9606 GN=ANP32E PE=1 SV=1	SLDLFNC#EITNLEDYR|SLDLFNC#EITNLEDYR	1|2	0.03|0.365	0.1975	0.23688	3	2	16.4927		SUBCELLULAR LOCATION: Cytoplasm {ECO:0000250}. Nucleus {ECO:0000250}.
Q9BTT0	87	ANP32E	AN32E_HUMAN Acidic leucine-rich nuclear phosphoprotein 32 family member E OS=Homo sapiens OX=9606 GN=ANP32E PE=1 SV=1	C#PNLTYLNLSGNK|C#PNLTYLNLSGNK	4|3	0.205|0.11	0.1575	0.06718	7	2	13.6069		SUBCELLULAR LOCATION: Cytoplasm {ECO:0000250}. Nucleus {ECO:0000250}.
P04083	343	ANXA1	ANXA1_HUMAN Annexin A1 OS=Homo sapiens OX=9606 GN=ANXA1 PE=1 SV=2	ILVALC#GGN|	1|	0.2|	0.2	NA	1	1	16.6667	Disulfide bond	SUBCELLULAR LOCATION: Nucleus {ECO:0000269|PubMed:10772777, ECO:0000269|PubMed:19625660}. Cytoplasm {ECO:0000269|PubMed:10772777, ECO:0000269|PubMed:17008549, ECO:0000269|PubMed:19625660}. Cell projection, cilium {ECO:0000250|UniProtKB:P46193}. Cell membrane {ECO:0000269|PubMed:10772777}. Membrane {ECO:0000269|PubMed:17008549, ECO:0000269|PubMed:2532504, ECO:0000269|PubMed:8557678}; Peripheral me…	Ontology_term=ECO:0000250;evidence=ECO:0000250|UniProtKB:P19619
P04083	324	ANXA1	ANXA1_HUMAN Annexin A1 OS=Homo sapiens OX=9606 GN=ANXA1 PE=1 SV=2	MYGISLC#QAILDETKGDYEK MYGISLC#QAILDETK|MYGISLC#QAILDETKGDYEK MYGISLC#QAILDETK	9|12	0.19|0.085	0.1375	0.07425	21	2	12.0879	Disulfide bond	SUBCELLULAR LOCATION: Nucleus {ECO:0000269|PubMed:10772777, ECO:0000269|PubMed:19625660}. Cytoplasm {ECO:0000269|PubMed:10772777, ECO:0000269|PubMed:17008549, ECO:0000269|PubMed:19625660}. Cell projection, cilium {ECO:0000250|UniProtKB:P46193}. Cell membrane {ECO:0000269|PubMed:10772777}. Membrane {ECO:0000269|PubMed:17008549, ECO:0000269|PubMed:2532504, ECO:0000269|PubMed:8557678}; Peripheral me…	Ontology_term=ECO:0000250;evidence=ECO:0000250|UniProtKB:P19619
P04083	270	ANXA1	ANXA1_HUMAN Annexin A1 OS=Homo sapiens OX=9606 GN=ANXA1 PE=1 SV=2	C#ATSKPAFFAEK|C#ATSKPAFFAEK	6|5	0.015|0.01	0.0125	0.00354	11	2	1.23457		SUBCELLULAR LOCATION: Nucleus {ECO:0000269|PubMed:10772777, ECO:0000269|PubMed:19625660}. Cytoplasm {ECO:0000269|PubMed:10772777, ECO:0000269|PubMed:17008549, ECO:0000269|PubMed:19625660}. Cell projection, cilium {ECO:0000250|UniProtKB:P46193}. Cell membrane {ECO:0000269|PubMed:10772777}. Membrane {ECO:0000269|PubMed:17008549, ECO:0000269|PubMed:2532504, ECO:0000269|PubMed:8557678}; Peripheral me…
P50995	384	ANXA11	ANX11_HUMAN Annexin A11 OS=Homo sapiens OX=9606 GN=ANXA11 PE=1 SV=1	FNAVLC#SR|FNAVLC#SR	1|2	0.00266|0.08717	0.04491	0.05976	3	2	4.29798		SUBCELLULAR LOCATION: Cytoplasm {ECO:0000269|PubMed:28469040}. Melanosome. Nucleus envelope. Nucleus, nucleoplasm {ECO:0000269|PubMed:28469040}. Cytoplasm, cytoskeleton, spindle. Note=Found throughout the nucleoplasm at interphase and during mitosis concentrates around the mitotic apparatus (By similarity). Elevation of intracellular calcium causes relocalization from the nucleoplasm to the nucle…
P12429	202	ANXA3	ANXA3_HUMAN Annexin A3 OS=Homo sapiens OX=9606 GN=ANXA3 PE=1 SV=3	FTEILC#LR WGTDEDKFTEILC#LR|FTEILC#LR WGTDEDKFTEILC#LR	5|4	0.05|0.07	0.06	0.01414	9	2	5.66038
P09525	108	ANXA4	ANXA4_HUMAN Annexin A4 OS=Homo sapiens OX=9606 GN=ANXA4 PE=1 SV=4	GAGTDEGC#LIEILASR|GAGTDEGC#LIEILASR	3|2	0.05|0.245	0.1475	0.13789	5	2	12.854
P09525	198	ANXA4	ANXA4_HUMAN Annexin A4 OS=Homo sapiens OX=9606 GN=ANXA4 PE=1 SV=4	FLTVLC#SR|FLTVLC#SR	4|3	0.00494|0.01	0.00747	0.00358	7	2	0.741461
P08758	316	ANXA5	ANXA5_HUMAN Annexin A5 OS=Homo sapiens OX=9606 GN=ANXA5 PE=1 SV=2	ALLLLC#GEDD|ALLLLC#GEDD	1|1	0.04|0.1	0.07	0.04243	2	2	6.54206
P08133	552	ANXA6	ANXA6_HUMAN Annexin A6 OS=Homo sapiens OX=9606 GN=ANXA6 PE=1 SV=3	FMTILC#TR|FMTILC#TR	3|1	0.27|0.75	0.51	0.33941	4	2	33.7748		SUBCELLULAR LOCATION: Cytoplasm {ECO:0000250}. Melanosome {ECO:0000269|PubMed:17081065}. Note=Identified by mass spectrometry in melanosome fractions from stage I to stage IV.
P20073	363	ANXA7	ANXA7_HUMAN Annexin A7 OS=Homo sapiens OX=9606 GN=ANXA7 PE=1 SV=3	LGTDESC#FNMILATR|LGTDESC#FNMILATR	2|1	0.025|0.15	0.0875	0.08839	3	2	8.04598
P20073	413	ANXA7	ANXA7_HUMAN Annexin A7 OS=Homo sapiens OX=9606 GN=ANXA7 PE=1 SV=3	TILQC#ALNRPAFFAER|TILQC#ALNRPAFFAER	1|1	0.00098|0.13	0.06549	0.09123	2	2	6.14647
P20073	298	ANXA7	ANXA7_HUMAN Annexin A7 OS=Homo sapiens OX=9606 GN=ANXA7 PE=1 SV=3	C#YQSEFGR|C#YQSEFGR	2|2	0.115|0.00873	0.06187	0.07514	4	2	5.82651
P20073	327	ANXA7	ANXA7_HUMAN Annexin A7 OS=Homo sapiens OX=9606 GN=ANXA7 PE=1 SV=3	LLVSMC#QGNR|LLVSMC#QGNR	3|1	0.05|0.04	0.045	0.00707	4	2	4.30622
P20073	285	ANXA7	ANXA7_HUMAN Annexin A7 OS=Homo sapiens OX=9606 GN=ANXA7 PE=1 SV=3	VLIEILC#TR|VLIEILC#TR	2|2	0.00098|0.00335	0.00217	0.00168	4	2	0.21653
P13928	206	ANXA8	ANXA8_HUMAN Annexin A8 OS=Homo sapiens OX=9606 GN=ANXA8 PE=1 SV=3	|FITILC#TR	|1	|0.08	0.08	NA	1	1	7.40741
O43747	160	AP1G1	AP1G1_HUMAN AP-1 complex subunit gamma-1 OS=Homo sapiens OX=9606 GN=AP1G1 PE=1 SV=5	AALC#AVHVIR|AALC#AVHVIR	4|3	2.15|0.62	1.385	1.08187	7	2	58.0713		SUBCELLULAR LOCATION: Golgi apparatus {ECO:0000269|PubMed:12773381}. Cytoplasmic vesicle, clathrin-coated vesicle membrane {ECO:0000269|PubMed:12773381}; Peripheral membrane protein {ECO:0000269|PubMed:12773381}; Cytoplasmic side {ECO:0000269|PubMed:12773381}. Note=Component of the coat surrounding the cytoplasmic face of coated vesicles located at the Golgi complex.
O43747	539	AP1G1	AP1G1_HUMAN AP-1 complex subunit gamma-1 OS=Homo sapiens OX=9606 GN=AP1G1 PE=1 SV=5	FTC#TVNR|FTC#TVNR	1|1	0.1|0.24	0.17	0.09899	2	2	14.5299		SUBCELLULAR LOCATION: Golgi apparatus {ECO:0000269|PubMed:12773381}. Cytoplasmic vesicle, clathrin-coated vesicle membrane {ECO:0000269|PubMed:12773381}; Peripheral membrane protein {ECO:0000269|PubMed:12773381}; Cytoplasmic side {ECO:0000269|PubMed:12773381}. Note=Component of the coat surrounding the cytoplasmic face of coated vesicles located at the Golgi complex.
O43747	202	AP1G1	AP1G1_HUMAN AP-1 complex subunit gamma-1 OS=Homo sapiens OX=9606 GN=AP1G1 PE=1 SV=5	NHGVLHTSVVLLTEMC#ER|	2|	0.115|	0.115	NA	2	1	10.3139		SUBCELLULAR LOCATION: Golgi apparatus {ECO:0000269|PubMed:12773381}. Cytoplasmic vesicle, clathrin-coated vesicle membrane {ECO:0000269|PubMed:12773381}; Peripheral membrane protein {ECO:0000269|PubMed:12773381}; Cytoplasmic side {ECO:0000269|PubMed:12773381}. Note=Component of the coat surrounding the cytoplasmic face of coated vesicles located at the Golgi complex.
O43747	106	AP1G1	AP1G1_HUMAN AP-1 complex subunit gamma-1 OS=Homo sapiens OX=9606 GN=AP1G1 PE=1 SV=5	QDVHLLMTNC#IK|	1|	0.06|	0.06	NA	1	1	5.66038		SUBCELLULAR LOCATION: Golgi apparatus {ECO:0000269|PubMed:12773381}. Cytoplasmic vesicle, clathrin-coated vesicle membrane {ECO:0000269|PubMed:12773381}; Peripheral membrane protein {ECO:0000269|PubMed:12773381}; Cytoplasmic side {ECO:0000269|PubMed:12773381}. Note=Component of the coat surrounding the cytoplasmic face of coated vesicles located at the Golgi complex.
O43747	353	AP1G1	AP1G1_HUMAN AP-1 complex subunit gamma-1 OS=Homo sapiens OX=9606 GN=AP1G1 PE=1 SV=5	|STIVDC#LK	|3	|0.06	0.06	NA	3	1	5.66038		SUBCELLULAR LOCATION: Golgi apparatus {ECO:0000269|PubMed:12773381}. Cytoplasmic vesicle, clathrin-coated vesicle membrane {ECO:0000269|PubMed:12773381}; Peripheral membrane protein {ECO:0000269|PubMed:12773381}; Cytoplasmic side {ECO:0000269|PubMed:12773381}. Note=Component of the coat surrounding the cytoplasmic face of coated vesicles located at the Golgi complex.
O75843	180	AP1G2	AP1G2_HUMAN AP-1 complex subunit gamma-like 2 OS=Homo sapiens OX=9606 GN=AP1G2 PE=1 SV=1	VPELSSVFLPPC#AQLLHER|VPELSSVFLPPC#AQLLHER	1|1	0.00098|0.19	0.09549	0.13366	2	2	8.71665		SUBCELLULAR LOCATION: Golgi apparatus membrane {ECO:0000269|PubMed:11333915, ECO:0000269|PubMed:9762922}; Peripheral membrane protein; Cytoplasmic side {ECO:0000269|PubMed:11333915}. Cytoplasmic vesicle membrane {ECO:0000269|PubMed:9733768}; Peripheral membrane protein. Endosome membrane {ECO:0000269|PubMed:16867982}; Peripheral membrane protein. Note=Mainly localized to perinuclear vesicular str…
P61966	47	AP1S1	AP1S1_HUMAN AP-1 complex subunit sigma-1A OS=Homo sapiens OX=9606 GN=AP1S1 PE=1 SV=1	MC#SFLEWR|MC#SFLEWR	1|1	0.38|0.13	0.255	0.17678	2	2	20.3187		SUBCELLULAR LOCATION: Golgi apparatus {ECO:0000269|PubMed:9733768}. Cytoplasmic vesicle membrane {ECO:0000269|PubMed:9733768}; Peripheral membrane protein {ECO:0000269|PubMed:9733768}; Cytoplasmic side {ECO:0000269|PubMed:9733768}. Membrane, clathrin-coated pit {ECO:0000269|PubMed:9733768}. Note=Component of the coat surrounding the cytoplasmic face of coated vesicles located at the Golgi complex.
O95782	533	AP2A1	AP2A1_HUMAN AP-2 complex subunit alpha-1 OS=Homo sapiens OX=9606 GN=AP2A1 PE=1 SV=3	FHLC#SVATR|FHLC#SVATR	4|6	0.115|1.39	0.7525	0.90156	10	2	42.9387		SUBCELLULAR LOCATION: Cell membrane {ECO:0000269|PubMed:16262731}. Membrane, coated pit {ECO:0000250}; Peripheral membrane protein {ECO:0000250}; Cytoplasmic side {ECO:0000250}. Note=AP-2 appears to be excluded from internalizing CCVs and to disengage from sites of endocytosis seconds before internalization of the nascent CCV. {ECO:0000250}.
O95782	225	AP2A1	AP2A1_HUMAN AP-2 complex subunit alpha-1 OS=Homo sapiens OX=9606 GN=AP2A1 PE=1 SV=3	TC#VSLAVSR|TC#VSLAVSR	1|1	0.14|0.44	0.29	0.21213	2	2	22.4806		SUBCELLULAR LOCATION: Cell membrane {ECO:0000269|PubMed:16262731}. Membrane, coated pit {ECO:0000250}; Peripheral membrane protein {ECO:0000250}; Cytoplasmic side {ECO:0000250}. Note=AP-2 appears to be excluded from internalizing CCVs and to disengage from sites of endocytosis seconds before internalization of the nascent CCV. {ECO:0000250}.
O95782	941	AP2A1	AP2A1_HUMAN AP-2 complex subunit alpha-1 OS=Homo sapiens OX=9606 GN=AP2A1 PE=1 SV=3	ALQVGC#LLR|ALQVGC#LLR	1|1	0.23|0.21	0.22	0.01414	2	2	18.0328		SUBCELLULAR LOCATION: Cell membrane {ECO:0000269|PubMed:16262731}. Membrane, coated pit {ECO:0000250}; Peripheral membrane protein {ECO:0000250}; Cytoplasmic side {ECO:0000250}. Note=AP-2 appears to be excluded from internalizing CCVs and to disengage from sites of endocytosis seconds before internalization of the nascent CCV. {ECO:0000250}.
O95782	283	AP2A1	AP2A1_HUMAN AP-2 complex subunit alpha-1 OS=Homo sapiens OX=9606 GN=AP2A1 PE=1 SV=3	LVEC#LETVLNK|LVEC#LETVLNK	1|1	0.3|0.11	0.205	0.13435	2	2	17.0124		SUBCELLULAR LOCATION: Cell membrane {ECO:0000269|PubMed:16262731}. Membrane, coated pit {ECO:0000250}; Peripheral membrane protein {ECO:0000250}; Cytoplasmic side {ECO:0000250}. Note=AP-2 appears to be excluded from internalizing CCVs and to disengage from sites of endocytosis seconds before internalization of the nascent CCV. {ECO:0000250}.
O95782	970	AP2A1	AP2A1_HUMAN AP-2 complex subunit alpha-1 OS=Homo sapiens OX=9606 GN=AP2A1 PE=1 SV=3	HLC#ELLAQQF|HLC#ELLAQQF	2|2	0.00775|0.12	0.06388	0.07937	4	2	6.00444		SUBCELLULAR LOCATION: Cell membrane {ECO:0000269|PubMed:16262731}. Membrane, coated pit {ECO:0000250}; Peripheral membrane protein {ECO:0000250}; Cytoplasmic side {ECO:0000250}. Note=AP-2 appears to be excluded from internalizing CCVs and to disengage from sites of endocytosis seconds before internalization of the nascent CCV. {ECO:0000250}.
O95782	492	AP2A1	AP2A1_HUMAN AP-2 complex subunit alpha-1 OS=Homo sapiens OX=9606 GN=AP2A1 PE=1 SV=3	TVFEALQAPAC#HENMVK|TVFEALQAPAC#HENMVK	7|4	0.01|0.06	0.035	0.03536	11	2	3.38164		SUBCELLULAR LOCATION: Cell membrane {ECO:0000269|PubMed:16262731}. Membrane, coated pit {ECO:0000250}; Peripheral membrane protein {ECO:0000250}; Cytoplasmic side {ECO:0000250}. Note=AP-2 appears to be excluded from internalizing CCVs and to disengage from sites of endocytosis seconds before internalization of the nascent CCV. {ECO:0000250}.
O94973	282	AP2A2	AP2A2_HUMAN AP-2 complex subunit alpha-2 OS=Homo sapiens OX=9606 GN=AP2A2 PE=1 SV=2	GRLTEC#LETILNK|GRLTEC#LETILNK	2|2	0.03549|0.02549	0.03049	0.00707	4	2	2.95879		SUBCELLULAR LOCATION: Cell membrane {ECO:0000250|UniProtKB:P17427}; Peripheral membrane protein {ECO:0000250|UniProtKB:P17427}; Cytoplasmic side {ECO:0000250|UniProtKB:P17427}. Membrane, coated pit {ECO:0000250|UniProtKB:P17427}; Peripheral membrane protein {ECO:0000250|UniProtKB:P17427}; Cytoplasmic side {ECO:0000250|UniProtKB:P17427}. Note=AP-2 appears to be excluded from internalizing CCVs and…
O94973	396	AP2A2	AP2A2_HUMAN AP-2 complex subunit alpha-2 OS=Homo sapiens OX=9606 GN=AP2A2 PE=1 SV=2	AVDLLYAMC#DR|	1|	0.03|	0.03	NA	1	1	2.91262		SUBCELLULAR LOCATION: Cell membrane {ECO:0000250|UniProtKB:P17427}; Peripheral membrane protein {ECO:0000250|UniProtKB:P17427}; Cytoplasmic side {ECO:0000250|UniProtKB:P17427}. Membrane, coated pit {ECO:0000250|UniProtKB:P17427}; Peripheral membrane protein {ECO:0000250|UniProtKB:P17427}; Cytoplasmic side {ECO:0000250|UniProtKB:P17427}. Note=AP-2 appears to be excluded from internalizing CCVs and…
O94973	491	AP2A2	AP2A2_HUMAN AP-2 complex subunit alpha-2 OS=Homo sapiens OX=9606 GN=AP2A2 PE=1 SV=2	TVFEALQAPAC#HENLVK|TVFEALQAPAC#HENLVK	4|3	0.05362|0.00098	0.0273	0.03722	7	2	2.65745		SUBCELLULAR LOCATION: Cell membrane {ECO:0000250|UniProtKB:P17427}; Peripheral membrane protein {ECO:0000250|UniProtKB:P17427}; Cytoplasmic side {ECO:0000250|UniProtKB:P17427}. Membrane, coated pit {ECO:0000250|UniProtKB:P17427}; Peripheral membrane protein {ECO:0000250|UniProtKB:P17427}; Cytoplasmic side {ECO:0000250|UniProtKB:P17427}. Note=AP-2 appears to be excluded from internalizing CCVs and…
O94973	532	AP2A2	AP2A2_HUMAN AP-2 complex subunit alpha-2 OS=Homo sapiens OX=9606 GN=AP2A2 PE=1 SV=2	FHLC#SVPTR|FHLC#SVPTR	4|3	0.01463|0.00786	0.01125	0.00479	7	2	1.11248		SUBCELLULAR LOCATION: Cell membrane {ECO:0000250|UniProtKB:P17427}; Peripheral membrane protein {ECO:0000250|UniProtKB:P17427}; Cytoplasmic side {ECO:0000250|UniProtKB:P17427}. Membrane, coated pit {ECO:0000250|UniProtKB:P17427}; Peripheral membrane protein {ECO:0000250|UniProtKB:P17427}; Cytoplasmic side {ECO:0000250|UniProtKB:P17427}. Note=AP-2 appears to be excluded from internalizing CCVs and…
O94973	903	AP2A2	AP2A2_HUMAN AP-2 complex subunit alpha-2 OS=Homo sapiens OX=9606 GN=AP2A2 PE=1 SV=2	TTQIGC#LLR|TTQIGC#LLR	4|4	0.01549|0.00492	0.01021	0.00747	8	2	1.01068		SUBCELLULAR LOCATION: Cell membrane {ECO:0000250|UniProtKB:P17427}; Peripheral membrane protein {ECO:0000250|UniProtKB:P17427}; Cytoplasmic side {ECO:0000250|UniProtKB:P17427}. Membrane, coated pit {ECO:0000250|UniProtKB:P17427}; Peripheral membrane protein {ECO:0000250|UniProtKB:P17427}; Cytoplasmic side {ECO:0000250|UniProtKB:P17427}. Note=AP-2 appears to be excluded from internalizing CCVs and…
O94973	134	AP2A2	AP2A2_HUMAN AP-2 complex subunit alpha-2 OS=Homo sapiens OX=9606 GN=AP2A2 PE=1 SV=2	NPTFMGLALHC#IASVGSR|	1|	0.00098|	0.00098	NA	1	1	0		SUBCELLULAR LOCATION: Cell membrane {ECO:0000250|UniProtKB:P17427}; Peripheral membrane protein {ECO:0000250|UniProtKB:P17427}; Cytoplasmic side {ECO:0000250|UniProtKB:P17427}. Membrane, coated pit {ECO:0000250|UniProtKB:P17427}; Peripheral membrane protein {ECO:0000250|UniProtKB:P17427}; Cytoplasmic side {ECO:0000250|UniProtKB:P17427}. Note=AP-2 appears to be excluded from internalizing CCVs and…
P63010	123	AP2B1	AP2B1_HUMAN AP-2 complex subunit beta OS=Homo sapiens OX=9606 GN=AP2B1 PE=1 SV=1	ITEYLC#EPLRK VDKITEYLC#EPLRK VDKITEYLC#EPLR|VDKITEYLC#EPLRK VDKITEYLC#EPLR	8|5	0.09|0.39	0.24	0.21213	13	2	19.3548		SUBCELLULAR LOCATION: Cell membrane {ECO:0000269|PubMed:14530274}. Membrane, coated pit {ECO:0000269|PubMed:14530274}; Peripheral membrane protein {ECO:0000269|PubMed:14530274}; Cytoplasmic side {ECO:0000269|PubMed:14530274}. Note=AP-2 appears to be excluded from internalizing CCVs and to disengage from sites of endocytosis seconds before internalization of the nascent CCV.
P63010	129	AP2B1	AP2B1_HUMAN AP-2 complex subunit beta OS=Homo sapiens OX=9606 GN=AP2B1 PE=1 SV=1	C#LKDEDPYVR|C#LKDEDPYVR	4|4	0.055|0.14	0.0975	0.0601	8	2	8.88383		SUBCELLULAR LOCATION: Cell membrane {ECO:0000269|PubMed:14530274}. Membrane, coated pit {ECO:0000269|PubMed:14530274}; Peripheral membrane protein {ECO:0000269|PubMed:14530274}; Cytoplasmic side {ECO:0000269|PubMed:14530274}. Note=AP-2 appears to be excluded from internalizing CCVs and to disengage from sites of endocytosis seconds before internalization of the nascent CCV.
P63010	144	AP2B1	AP2B1_HUMAN AP-2 complex subunit beta OS=Homo sapiens OX=9606 GN=AP2B1 PE=1 SV=1	TAAVC#VAK|TAAVC#VAK	1|2	0.00098|0.035	0.01799	0.02406	3	2	1.76721		SUBCELLULAR LOCATION: Cell membrane {ECO:0000269|PubMed:14530274}. Membrane, coated pit {ECO:0000269|PubMed:14530274}; Peripheral membrane protein {ECO:0000269|PubMed:14530274}; Cytoplasmic side {ECO:0000269|PubMed:14530274}. Note=AP-2 appears to be excluded from internalizing CCVs and to disengage from sites of endocytosis seconds before internalization of the nascent CCV.
P63010	857	AP2B1	AP2B1_HUMAN AP-2 complex subunit beta OS=Homo sapiens OX=9606 GN=AP2B1 PE=1 SV=1	EC#HLNADTVSSK|EC#HLNADTVSSK	2|2	0.00098|0.01549	0.00823	0.01026	4	2	0.816282		SUBCELLULAR LOCATION: Cell membrane {ECO:0000269|PubMed:14530274}. Membrane, coated pit {ECO:0000269|PubMed:14530274}; Peripheral membrane protein {ECO:0000269|PubMed:14530274}; Cytoplasmic side {ECO:0000269|PubMed:14530274}. Note=AP-2 appears to be excluded from internalizing CCVs and to disengage from sites of endocytosis seconds before internalization of the nascent CCV.
Q96CW1	212	AP2M1	AP2M1_HUMAN AP-2 complex subunit mu OS=Homo sapiens OX=9606 GN=AP2M1 PE=1 SV=2	SYLSGMPEC#K|SYLSGMPEC#K	2|5	0.95|0.56	0.755	0.27577	7	2	43.0199		SUBCELLULAR LOCATION: Cell membrane {ECO:0000269|PubMed:31104773}. Membrane, coated pit {ECO:0000269|PubMed:31104773}; Peripheral membrane protein; Cytoplasmic side. Note=AP-2 appears to be excluded from internalizing CCVs and to disengage from sites of endocytosis seconds before internalization of the nascent CCV. {ECO:0000250}.
Q96CW1	337	AP2M1	AP2M1_HUMAN AP-2 complex subunit mu OS=Homo sapiens OX=9606 GN=AP2M1 PE=1 SV=2	IPTPLNTSGVQVIC#MK|IPTPLNTSGVQVIC#MK	5|6	0.07|0.945	0.5075	0.61872	11	2	33.665		SUBCELLULAR LOCATION: Cell membrane {ECO:0000269|PubMed:31104773}. Membrane, coated pit {ECO:0000269|PubMed:31104773}; Peripheral membrane protein; Cytoplasmic side. Note=AP-2 appears to be excluded from internalizing CCVs and to disengage from sites of endocytosis seconds before internalization of the nascent CCV. {ECO:0000250}.
O00203	507	AP3B1	AP3B1_HUMAN AP-3 complex subunit beta-1 OS=Homo sapiens OX=9606 GN=AP3B1 PE=1 SV=3	ASILWLIGENC#ER|ASILWLIGENC#ER	2|2	20.59|2.53549	11.5627	12.7665	4	2	92.04		SUBCELLULAR LOCATION: Cytoplasmic vesicle, clathrin-coated vesicle membrane {ECO:0000250}; Peripheral membrane protein {ECO:0000250}; Cytoplasmic side {ECO:0000250}. Golgi apparatus {ECO:0000250}. Note=Component of the coat surrounding the cytoplasmic face of coated vesicles located at the Golgi complex. {ECO:0000250}.
O14617	39	AP3D1	AP3D1_HUMAN AP-3 complex subunit delta-1 OS=Homo sapiens OX=9606 GN=AP3D1 PE=1 SV=1	YISQC#IDEIKQELK|YISQC#IDEIKQELK	2|3	0.395|0.16	0.2775	0.16617	5	2	21.7221		SUBCELLULAR LOCATION: Cytoplasm {ECO:0000250}. Golgi apparatus membrane {ECO:0000250}; Peripheral membrane protein {ECO:0000250}; Cytoplasmic side {ECO:0000250}.
O14617	208	AP3D1	AP3D1_HUMAN AP-3 complex subunit delta-1 OS=Homo sapiens OX=9606 GN=AP3D1 PE=1 SV=1	|EKLEDPDPGVQSAAVNVIC#ELAR	|1	|0.18	0.18	NA	1	1	15.2542		SUBCELLULAR LOCATION: Cytoplasm {ECO:0000250}. Golgi apparatus membrane {ECO:0000250}; Peripheral membrane protein {ECO:0000250}; Cytoplasmic side {ECO:0000250}.
O14617	574	AP3D1	AP3D1_HUMAN AP-3 complex subunit delta-1 OS=Homo sapiens OX=9606 GN=AP3D1 PE=1 SV=1	ASC#ILQLVK|ASC#ILQLVK	1|1	0.02|0.00098	0.01049	0.01345	2	2	1.03811		SUBCELLULAR LOCATION: Cytoplasm {ECO:0000250}. Golgi apparatus membrane {ECO:0000250}; Peripheral membrane protein {ECO:0000250}; Cytoplasmic side {ECO:0000250}.
Q9Y2T2	29	AP3M1	AP3M1_HUMAN AP-3 complex subunit mu-1 OS=Homo sapiens OX=9606 GN=AP3M1 PE=1 SV=1	SVVSQSVC#DYFFEAQEK|SVVSQSVC#DYFFEAQEK	4|3	0.535|0.52	0.5275	0.01061	7	2	34.5336		SUBCELLULAR LOCATION: Golgi apparatus. Cytoplasmic vesicle membrane {ECO:0000250}; Peripheral membrane protein {ECO:0000250}; Cytoplasmic side {ECO:0000250}. Note=Component of the coat surrounding the cytoplasmic face of coated vesicles located at the Golgi complex. {ECO:0000250}.
Q9Y2T2	236	AP3M1	AP3M1_HUMAN AP-3 complex subunit mu-1 OS=Homo sapiens OX=9606 GN=AP3M1 PE=1 SV=1	LLDDVSFHPC#IR|LLDDVSFHPC#IR	4|3	0.195|0.07	0.1325	0.08839	7	2	11.6998		SUBCELLULAR LOCATION: Golgi apparatus. Cytoplasmic vesicle membrane {ECO:0000250}; Peripheral membrane protein {ECO:0000250}; Cytoplasmic side {ECO:0000250}. Note=Component of the coat surrounding the cytoplasmic face of coated vesicles located at the Golgi complex. {ECO:0000250}.
P53677	236	AP3M2	AP3M2_HUMAN AP-3 complex subunit mu-2 OS=Homo sapiens OX=9606 GN=AP3M2 PE=2 SV=1	LLDDVSFHPC#VR|	1|	0.9|	0.9	NA	1	1	47.3684		SUBCELLULAR LOCATION: Golgi apparatus. Cytoplasmic vesicle membrane {ECO:0000250}; Peripheral membrane protein {ECO:0000250}; Cytoplasmic side {ECO:0000250}. Note=Component of the coat surrounding the cytoplasmic face of coated vesicles located at the Golgi complex. {ECO:0000250}.
O00213	499	APBB1	APBB1_HUMAN Amyloid-beta A4 precursor protein-binding family B member 1 OS=Homo sapiens OX=9606 GN=APBB1 PE=1 SV=2	|NIATSLHEIC#SK	|1	|0.02	0.02	NA	1	1	1.96078		SUBCELLULAR LOCATION: Cell membrane. Cytoplasm. Nucleus. Cell projection, growth cone {ECO:0000250}. Nucleus speckle. Note=Colocalizes with TSHZ3 in axonal growth cone (By similarity). In normal conditions, it mainly localizes to the cytoplasm, while a small fraction is tethered to the cell membrane via its interaction with APP. Following exposure to DNA damaging agents, it is released from cell …
P25054	575	APC	APC_HUMAN Adenomatous polyposis coli protein OS=Homo sapiens OX=9606 GN=APC PE=1 SV=2	|ALMEC#ALEVK	|1	|0.5	0.5	NA	1	1	33.3333		SUBCELLULAR LOCATION: Cell junction, adherens junction {ECO:0000269|PubMed:16611247}. Cytoplasm, cytoskeleton {ECO:0000269|PubMed:19632184, ECO:0000269|PubMed:20937854}. Cell projection, lamellipodium {ECO:0000269|PubMed:19151759}. Cell projection, ruffle membrane {ECO:0000269|PubMed:19151759}. Cytoplasm {ECO:0000269|PubMed:10947987}. Cell membrane {ECO:0000269|PubMed:10947987, ECO:0000269|PubMed…
P25054	914	APC	APC_HUMAN Adenomatous polyposis coli protein OS=Homo sapiens OX=9606 GN=APC PE=1 SV=2	SSGSTTELHC#VTDER|	1|	0.18|	0.18	NA	1	1	15.2542		SUBCELLULAR LOCATION: Cell junction, adherens junction {ECO:0000269|PubMed:16611247}. Cytoplasm, cytoskeleton {ECO:0000269|PubMed:19632184, ECO:0000269|PubMed:20937854}. Cell projection, lamellipodium {ECO:0000269|PubMed:19151759}. Cell projection, ruffle membrane {ECO:0000269|PubMed:19151759}. Cytoplasm {ECO:0000269|PubMed:10947987}. Cell membrane {ECO:0000269|PubMed:10947987, ECO:0000269|PubMed…
P27695	208	APEX1	APEX1_HUMAN DNA-(apurinic or apyrimidinic site) lyase OS=Homo sapiens OX=9606 GN=APEX1 PE=1 SV=2	KPLVLC#GDLNVAHEEIDLR|KPLVLC#GDLNVAHEEIDLR	9|9	0.07|0.09	0.08	0.01414	18	2	7.40741	Mutagenesis	SUBCELLULAR LOCATION: Nucleus. Nucleus, nucleolus. Nucleus speckle. Endoplasmic reticulum. Cytoplasm. Note=Detected in the cytoplasm of B-cells stimulated to switch (By similarity). Colocalized with SIRT1 in the nucleus. Colocalized with YBX1 in nuclear speckles after genotoxic stress. Together with OGG1 is recruited to nuclear speckles in UVA-irradiated cells. Colocalized with nucleolin and NPM1…	Note=Does not abolish the redox activity. C->A;Ontology_term=ECO:0000269,ECO:0000269;evidence=ECO:0000269|PubMed:18579163,ECO:0000269|PubMed:8355688;Dbxref=PMID:18579163,PMID:8355688
P27695	93	APEX1	APEX1_HUMAN DNA-(apurinic or apyrimidinic site) lyase OS=Homo sapiens OX=9606 GN=APEX1 PE=1 SV=2	GLDWVKEEAPDILC#LQETK|EEAPDILC#LQETK GLDWVKEEAPDILC#LQETK	3|3	0.46|1.11	0.785	0.45962	6	2	43.9776	Modified residue$Disulfide bond$Mutagenesis$Mutagenesis	SUBCELLULAR LOCATION: Nucleus. Nucleus, nucleolus. Nucleus speckle. Endoplasmic reticulum. Cytoplasm. Note=Detected in the cytoplasm of B-cells stimulated to switch (By similarity). Colocalized with SIRT1 in the nucleus. Colocalized with YBX1 in nuclear speckles after genotoxic stress. Together with OGG1 is recruited to nuclear speckles in UVA-irradiated cells. Colocalized with nucleolin and NPM1…	Note=S-nitrosocysteine%3B alternate;Ontology_term=ECO:0000269;evidence=ECO:0000269|PubMed:17403694;Dbxref=PMID:17403694$Note=Alternate;Ontology_term=ECO:0000305;evidence=ECO:0000305$Note=Abolishes partially the redox activity. C->A;Ontology_term=ECO:0000269,ECO:0000269;evidence=ECO:0000269|PubMed:18579163,ECO:0000269|PubMed:8355688;Dbxref=PMID:18579163,PMID:8355688$Note=Does not abolish NO-induce…
P27695	65	APEX1	APEX1_HUMAN DNA-(apurinic or apyrimidinic site) lyase OS=Homo sapiens OX=9606 GN=APEX1 PE=1 SV=2	IC#SWNVDGLR|IC#SWNVDGLR	2|2	0.07|0.11	0.09	0.02828	4	2	8.25688	Modified residue$Disulfide bond$Mutagenesis$Mutagenesis	SUBCELLULAR LOCATION: Nucleus. Nucleus, nucleolus. Nucleus speckle. Endoplasmic reticulum. Cytoplasm. Note=Detected in the cytoplasm of B-cells stimulated to switch (By similarity). Colocalized with SIRT1 in the nucleus. Colocalized with YBX1 in nuclear speckles after genotoxic stress. Together with OGG1 is recruited to nuclear speckles in UVA-irradiated cells. Colocalized with nucleolin and NPM1…	Note=S-nitrosocysteine%3B alternate;Ontology_term=ECO:0000269;evidence=ECO:0000269|PubMed:17403694;Dbxref=PMID:17403694$Note=Alternate;Ontology_term=ECO:0000305;evidence=ECO:0000305$Note=Abolishes the redox activity. Does not abolish the AP endodeoxyribonuclease and phosphodiesterase activities. Reduces protection from granzyme A-mediated cell death%3B when associated with A-31 and A-210. C->A;On…
Q9BZZ5	297	API5	API5_HUMAN Apoptosis inhibitor 5 OS=Homo sapiens OX=9606 GN=API5 PE=1 SV=3	|LLAEMSSFC#GDMEK	|1	|0.15	0.15	NA	1	1	13.0435		SUBCELLULAR LOCATION: Nucleus {ECO:0000269|PubMed:11075807}. Cytoplasm {ECO:0000269|PubMed:11075807}. Note=Mainly nuclear. Can also be cytoplasmic.; SUBCELLULAR LOCATION: [Isoform 3]: Cytoplasm.
Q96GX9	32	APIP	MTNB_HUMAN Methylthioribulose-1-phosphate dehydratase OS=Homo sapiens OX=9606 GN=APIP PE=1 SV=1	YLIPELC#K|YLIPELC#K	2|1	0.395|0.53	0.4625	0.09546	3	2	31.6239		SUBCELLULAR LOCATION: Cytoplasm {ECO:0000255|HAMAP-Rule:MF_03116, ECO:0000269|PubMed:15262985, ECO:0000269|PubMed:23285211}.
Q96GX9	188	APIP	MTNB_HUMAN Methylthioribulose-1-phosphate dehydratase OS=Homo sapiens OX=9606 GN=APIP PE=1 SV=1	MAHAMNEYPDSC#AVLVR|MAHAMNEYPDSC#AVLVR	7|10	0.16|0.205	0.1825	0.03182	17	2	15.4334		SUBCELLULAR LOCATION: Cytoplasm {ECO:0000255|HAMAP-Rule:MF_03116, ECO:0000269|PubMed:15262985, ECO:0000269|PubMed:23285211}.
Q9HDC9	149	APMAP	APMAP_HUMAN Adipocyte plasma membrane-associated protein OS=Homo sapiens OX=9606 GN=APMAP PE=1 SV=2	TRDDEPVC#GRPLGIR|	1|	1.06|	1.06	NA	1	1	51.4563		SUBCELLULAR LOCATION: Membrane {ECO:0000269|PubMed:18513186}; Single-pass type II membrane protein {ECO:0000269|PubMed:18513186}.
Q9HDC9	409	APMAP	APMAP_HUMAN Adipocyte plasma membrane-associated protein OS=Homo sapiens OX=9606 GN=APMAP PE=1 SV=2	SPFLC#R|SPFLC#R	1|1	0.06|0.24	0.15	0.12728	2	2	13.0435		SUBCELLULAR LOCATION: Membrane {ECO:0000269|PubMed:18513186}; Single-pass type II membrane protein {ECO:0000269|PubMed:18513186}.
Q9HDC9	140	APMAP	APMAP_HUMAN Adipocyte plasma membrane-associated protein OS=Homo sapiens OX=9606 GN=APMAP PE=1 SV=2	FGSGPC#K|FGSGPC#K	1|2	0.05|0.045	0.0475	0.00354	3	2	4.53461		SUBCELLULAR LOCATION: Membrane {ECO:0000269|PubMed:18513186}; Single-pass type II membrane protein {ECO:0000269|PubMed:18513186}.
Q9UH17	354	APOBEC3B	ABC3B_HUMAN DNA dC->dU-editing enzyme APOBEC-3B OS=Homo sapiens OX=9606 GN=APOBEC3B PE=1 SV=1	QGC#PFQPWDGLEEHSQALSGR|QGC#PFQPWDGLEEHSQALSGR	1|2	0.55|0.59549	0.57275	0.03217	3	2	36.4171		SUBCELLULAR LOCATION: Nucleus {ECO:0000269|PubMed:16699599, ECO:0000269|PubMed:18667511, ECO:0000269|PubMed:21835787, ECO:0000269|PubMed:22915799}.
Q9NRW3	156	APOBEC3C	ABC3C_HUMAN DNA dC->dU-editing enzyme APOBEC-3C OS=Homo sapiens OX=9606 GN=APOBEC3C PE=1 SV=2	YC#WENFVYNDNEPFKPWK|YC#WENFVYNDNEPFKPWK	2|3	0.06549|0.08	0.07275	0.01026	5	2	6.78164		SUBCELLULAR LOCATION: Nucleus. Cytoplasm.
P05067	174	APP	A4_HUMAN Amyloid-beta precursor protein OS=Homo sapiens OX=9606 GN=APP PE=1 SV=3	STNLHDYGMLLPC#GIDK|STNLHDYGMLLPC#GIDK	4|4	0.475|0.175	0.325	0.21213	8	2	24.5283	Disulfide bond$Disulfide bond$Disulfide bond	SUBCELLULAR LOCATION: Cell membrane {ECO:0000269|PubMed:10383380, ECO:0000269|PubMed:20580937, ECO:0000269|PubMed:2649245, ECO:0000305|PubMed:25122912}; Single-pass type I membrane protein {ECO:0000269|PubMed:30630874, ECO:0000305|PubMed:10383380, ECO:0000305|PubMed:25122912}. Membrane {ECO:0000269|PubMed:2900137, ECO:0000305|PubMed:22584060}; Single-pass type I membrane protein {ECO:0000269|PubM…	Ontology_term=ECO:0000244,ECO:0000244,ECO:0000244,ECO:0000244,ECO:0000244,ECO:0000244,ECO:0000244,ECO:0000244,ECO:0000244,ECO:0000255,ECO:0000269,ECO:0000269,ECO:0000269;evidence=ECO:0000244|PDB:1OWT,ECO:0000244|PDB:2FJZ,ECO:0000244|PDB:2FK1,ECO:0000244|PDB:2FK2,ECO:0000244|PDB:2FK3,ECO:0000244|PDB:2FKL,ECO:0000244|PDB:2FMA,ECO:0000244|PDB:3KTM,ECO:0000244|PDB:4PWQ,ECO:0000255|PROSITE-ProRule:PRU…
O60306	1144	AQR	AQR_HUMAN RNA helicase aquarius OS=Homo sapiens OX=9606 GN=AQR PE=1 SV=4	ASLC#NLYNWR|ASLC#NLYNWR	1|1	0.39|0.00098	0.19549	0.27508	2	2	16.3523		SUBCELLULAR LOCATION: Nucleus {ECO:0000269|PubMed:11991638, ECO:0000269|PubMed:25599396, ECO:0000269|PubMed:28076346, ECO:0000269|PubMed:28502770}. Nucleus, nucleoplasm {ECO:0000269|PubMed:16949364}. Note=Localizes to speckle-like regions of the nucleoplasm. {ECO:0000269|PubMed:16949364}.
P10398	192	ARAF	ARAF_HUMAN Serine/threonine-protein kinase A-Raf OS=Homo sapiens OX=9606 GN=ARAF PE=1 SV=2	TQHC#DPEHFPFPAPANAPLQR|TQHC#DPEHFPFPAPANAPLQR	2|1	3.04|4.56	3.8	1.0748	3	2	79.1667
Q96P48	1176	ARAP1	ARAP1_HUMAN Arf-GAP with Rho-GAP domain, ANK repeat and PH domain-containing protein 1 OS=Homo sapiens OX=9606 GN=ARAP1 PE=1 SV=3	VAGTASGTQHAGDFIC#TVYLEEK|VAGTASGTQHAGDFIC#TVYLEEK	1|1	0.26|0.35	0.305	0.06364	2	2	23.3716		SUBCELLULAR LOCATION: Cytoplasm. Golgi apparatus, Golgi stack membrane; Peripheral membrane protein. Cell membrane. Note=Associated with Golgi stacks in resting cells. Throughout the cytoplasm and in surface protrusion in cells that are in the process of attaching to a surface and spreading.
P48444	94	ARCN1	COPD_HUMAN Coatomer subunit delta OS=Homo sapiens OX=9606 GN=ARCN1 PE=1 SV=1	VIPEYC#R|VIPEYC#R	2|2	0.535|0.43	0.4825	0.07425	4	2	32.5464		SUBCELLULAR LOCATION: Cytoplasm {ECO:0000250}. Golgi apparatus membrane {ECO:0000250}; Peripheral membrane protein {ECO:0000250}; Cytoplasmic side {ECO:0000250}. Cytoplasmic vesicle, COPI-coated vesicle membrane {ECO:0000250}; Peripheral membrane protein {ECO:0000250}; Cytoplasmic side {ECO:0000250}. Note=The coatomer is cytoplasmic or polymerized on the cytoplasmic side of the Golgi, as well as …
P48444	479	ARCN1	COPD_HUMAN Coatomer subunit delta OS=Homo sapiens OX=9606 GN=ARCN1 PE=1 SV=1	NYC#NIQVTK|NYC#NIQVTK	2|1	0.2|0.09	0.145	0.07778	3	2	12.6638		SUBCELLULAR LOCATION: Cytoplasm {ECO:0000250}. Golgi apparatus membrane {ECO:0000250}; Peripheral membrane protein {ECO:0000250}; Cytoplasmic side {ECO:0000250}. Cytoplasmic vesicle, COPI-coated vesicle membrane {ECO:0000250}; Peripheral membrane protein {ECO:0000250}; Cytoplasmic side {ECO:0000250}. Note=The coatomer is cytoplasmic or polymerized on the cytoplasmic side of the Golgi, as well as …
P48444	441	ARCN1	COPD_HUMAN Coatomer subunit delta OS=Homo sapiens OX=9606 GN=ARCN1 PE=1 SV=1	RNTLEWC#LPVIDAK NTLEWC#LPVIDAK|RNTLEWC#LPVIDAK NTLEWC#LPVIDAK	6|4	0.04|0.12	0.08	0.05657	10	2	7.40741		SUBCELLULAR LOCATION: Cytoplasm {ECO:0000250}. Golgi apparatus membrane {ECO:0000250}; Peripheral membrane protein {ECO:0000250}; Cytoplasmic side {ECO:0000250}. Cytoplasmic vesicle, COPI-coated vesicle membrane {ECO:0000250}; Peripheral membrane protein {ECO:0000250}; Cytoplasmic side {ECO:0000250}. Note=The coatomer is cytoplasmic or polymerized on the cytoplasmic side of the Golgi, as well as …
P48444	286	ARCN1	COPD_HUMAN Coatomer subunit delta OS=Homo sapiens OX=9606 GN=ARCN1 PE=1 SV=1	|ITLTC#GR	|2	|0.025	0.025	NA	2	1	2.43902		SUBCELLULAR LOCATION: Cytoplasm {ECO:0000250}. Golgi apparatus membrane {ECO:0000250}; Peripheral membrane protein {ECO:0000250}; Cytoplasmic side {ECO:0000250}. Cytoplasmic vesicle, COPI-coated vesicle membrane {ECO:0000250}; Peripheral membrane protein {ECO:0000250}; Cytoplasmic side {ECO:0000250}. Note=The coatomer is cytoplasmic or polymerized on the cytoplasmic side of the Golgi, as well as …
P48444	9	ARCN1	COPD_HUMAN Coatomer subunit delta OS=Homo sapiens OX=9606 GN=ARCN1 PE=1 SV=1	VLLAAAVC#TK|VLLAAAVC#TK	3|1	0.02|0.00098	0.01049	0.01345	4	2	1.03811		SUBCELLULAR LOCATION: Cytoplasm {ECO:0000250}. Golgi apparatus membrane {ECO:0000250}; Peripheral membrane protein {ECO:0000250}; Cytoplasmic side {ECO:0000250}. Cytoplasmic vesicle, COPI-coated vesicle membrane {ECO:0000250}; Peripheral membrane protein {ECO:0000250}; Cytoplasmic side {ECO:0000250}. Note=The coatomer is cytoplasmic or polymerized on the cytoplasmic side of the Golgi, as well as …
P18085	62	ARF4	ARF4_HUMAN ADP-ribosylation factor 4 OS=Homo sapiens OX=9606 GN=ARF4 PE=1 SV=3	NIC#FTVWDVGGQDR|NIC#FTVWDVGGQDR	1|1	0.25|0.24	0.245	0.00707	2	2	19.6787		SUBCELLULAR LOCATION: Golgi apparatus. Membrane {ECO:0000305}; Lipid-anchor {ECO:0000305}.
P84085	62	ARF5	ARF5_HUMAN ADP-ribosylation factor 5 OS=Homo sapiens OX=9606 GN=ARF5 PE=1 SV=2	NIC#FTVWDVGGQDK|	1|	0.07|	0.07	NA	1	1	6.54206		SUBCELLULAR LOCATION: Golgi apparatus {ECO:0000269|PubMed:17555535}. Cytoplasm, perinuclear region {ECO:0000269|PubMed:17555535}. Membrane {ECO:0000305}; Lipid-anchor {ECO:0000305}. Golgi apparatus, trans-Golgi network membrane {ECO:0000250|UniProtKB:P84084}; Lipid-anchor {ECO:0000250|UniProtKB:P84084}.
Q8N6T3	351	ARFGAP1	ARFG1_HUMAN ADP-ribosylation factor GTPase-activating protein 1 OS=Homo sapiens OX=9606 GN=ARFGAP1 PE=1 SV=2	KSPSSDSWTC#ADTSTER|KSPSSDSWTC#ADTSTER	2|2	0.065|0.03049	0.04775	0.0244	4	2	4.55738		SUBCELLULAR LOCATION: Cytoplasm {ECO:0000250}. Golgi apparatus {ECO:0000250}. Note=Associates with the Golgi complex. {ECO:0000250}.
Q9NP61	241	ARFGAP3	ARFG3_HUMAN ADP-ribosylation factor GTPase-activating protein 3 OS=Homo sapiens OX=9606 GN=ARFGAP3 PE=1 SV=1	LANTC#FNEIEK|LANTC#FNEIEK	1|1	0.62|0.36	0.49	0.18385	2	2	32.8859		SUBCELLULAR LOCATION: Cytoplasm {ECO:0000269|PubMed:17760859}. Golgi apparatus membrane {ECO:0000269|PubMed:17760859}; Peripheral membrane protein {ECO:0000269|PubMed:17760859}; Cytoplasmic side {ECO:0000269|PubMed:17760859}. Note=Also found on peripheral punctate structures likely to be endoplasmic reticulum-Golgi intermediate compartment.
Q9NP61	312	ARFGAP3	ARFG3_HUMAN ADP-ribosylation factor GTPase-activating protein 3 OS=Homo sapiens OX=9606 GN=ARFGAP3 PE=1 SV=1	LGMGFGNC#R|LGMGFGNC#R	3|3	0.03|0.04	0.035	0.00707	6	2	3.38164		SUBCELLULAR LOCATION: Cytoplasm {ECO:0000269|PubMed:17760859}. Golgi apparatus membrane {ECO:0000269|PubMed:17760859}; Peripheral membrane protein {ECO:0000269|PubMed:17760859}; Cytoplasmic side {ECO:0000269|PubMed:17760859}. Note=Also found on peripheral punctate structures likely to be endoplasmic reticulum-Golgi intermediate compartment.
Q9Y6D6	1685	ARFGEF1	BIG1_HUMAN Brefeldin A-inhibited guanine nucleotide-exchange protein 1 OS=Homo sapiens OX=9606 GN=ARFGEF1 PE=1 SV=2	LLDC#LLESHR|LLDC#LLESHR	1|1	0.00098|1.02	0.51049	0.72056	2	2	33.7963		SUBCELLULAR LOCATION: Cytoplasm. Cytoplasm, perinuclear region. Golgi apparatus {ECO:0000269|PubMed:12571360}. Golgi apparatus, trans-Golgi network membrane {ECO:0000269|PubMed:27373159, ECO:0000269|PubMed:27436755}. Nucleus {ECO:0000269|PubMed:14973189}. Nucleus, nucleolus {ECO:0000269|PubMed:14973189}. Nucleus matrix {ECO:0000269|PubMed:14973189}. Note=Translocates from cytoplasm to membranes a…
Q9Y6D6	1148	ARFGEF1	BIG1_HUMAN Brefeldin A-inhibited guanine nucleotide-exchange protein 1 OS=Homo sapiens OX=9606 GN=ARFGEF1 PE=1 SV=2	WLC#AVSMDELLSTTHPR|WLC#AVSMDELLSTTHPR	1|2	0.67|0.265	0.4675	0.28638	3	2	31.8569		SUBCELLULAR LOCATION: Cytoplasm. Cytoplasm, perinuclear region. Golgi apparatus {ECO:0000269|PubMed:12571360}. Golgi apparatus, trans-Golgi network membrane {ECO:0000269|PubMed:27373159, ECO:0000269|PubMed:27436755}. Nucleus {ECO:0000269|PubMed:14973189}. Nucleus, nucleolus {ECO:0000269|PubMed:14973189}. Nucleus matrix {ECO:0000269|PubMed:14973189}. Note=Translocates from cytoplasm to membranes a…
Q9Y6D6	37	ARFGEF1	BIG1_HUMAN Brefeldin A-inhibited guanine nucleotide-exchange protein 1 OS=Homo sapiens OX=9606 GN=ARFGEF1 PE=1 SV=2	AC#EVALEEIKAETEK|	1|	0.27|	0.27	NA	1	1	21.2598		SUBCELLULAR LOCATION: Cytoplasm. Cytoplasm, perinuclear region. Golgi apparatus {ECO:0000269|PubMed:12571360}. Golgi apparatus, trans-Golgi network membrane {ECO:0000269|PubMed:27373159, ECO:0000269|PubMed:27436755}. Nucleus {ECO:0000269|PubMed:14973189}. Nucleus, nucleolus {ECO:0000269|PubMed:14973189}. Nucleus matrix {ECO:0000269|PubMed:14973189}. Note=Translocates from cytoplasm to membranes a…
Q9Y6D6	88	ARFGEF1	BIG1_HUMAN Brefeldin A-inhibited guanine nucleotide-exchange protein 1 OS=Homo sapiens OX=9606 GN=ARFGEF1 PE=1 SV=2	TNFIEADKYFLPFELAC#QSK|TNFIEADKYFLPFELAC#QSK	4|2	0.32|0.21549	0.26775	0.0739	6	2	21.1201		SUBCELLULAR LOCATION: Cytoplasm. Cytoplasm, perinuclear region. Golgi apparatus {ECO:0000269|PubMed:12571360}. Golgi apparatus, trans-Golgi network membrane {ECO:0000269|PubMed:27373159, ECO:0000269|PubMed:27436755}. Nucleus {ECO:0000269|PubMed:14973189}. Nucleus, nucleolus {ECO:0000269|PubMed:14973189}. Nucleus matrix {ECO:0000269|PubMed:14973189}. Note=Translocates from cytoplasm to membranes a…
Q9Y6D6	1050	ARFGEF1	BIG1_HUMAN Brefeldin A-inhibited guanine nucleotide-exchange protein 1 OS=Homo sapiens OX=9606 GN=ARFGEF1 PE=1 SV=2	C#ISQLELAQLIGTGVKPR|	1|	0.00098|	0.00098	NA	1	1	0		SUBCELLULAR LOCATION: Cytoplasm. Cytoplasm, perinuclear region. Golgi apparatus {ECO:0000269|PubMed:12571360}. Golgi apparatus, trans-Golgi network membrane {ECO:0000269|PubMed:27373159, ECO:0000269|PubMed:27436755}. Nucleus {ECO:0000269|PubMed:14973189}. Nucleus, nucleolus {ECO:0000269|PubMed:14973189}. Nucleus matrix {ECO:0000269|PubMed:14973189}. Note=Translocates from cytoplasm to membranes a…
Q9Y6D5	1095	ARFGEF2	BIG2_HUMAN Brefeldin A-inhibited guanine nucleotide-exchange protein 2 OS=Homo sapiens OX=9606 GN=ARFGEF2 PE=1 SV=3	WLC#AVSMDELASPHHPR|	1|	0.33|	0.33	NA	1	1	24.812		SUBCELLULAR LOCATION: Cytoplasm. Membrane. Golgi apparatus. Cytoplasm, perinuclear region. Golgi apparatus, trans-Golgi network {ECO:0000250}. Endosome {ECO:0000250}. Cytoplasm, cytoskeleton, microtubule organizing center, centrosome. Cell projection, dendrite {ECO:0000250}. Cytoplasmic vesicle {ECO:0000250}. Cell junction, synapse {ECO:0000250}. Cytoplasm, cytoskeleton {ECO:0000250}. Note=Transl…
Q9Y6D5	1617	ARFGEF2	BIG2_HUMAN Brefeldin A-inhibited guanine nucleotide-exchange protein 2 OS=Homo sapiens OX=9606 GN=ARFGEF2 PE=1 SV=3	LLDC#LQESHSFSK|LLDC#LQESHSFSK	2|4	0.45|0.15	0.3	0.21213	6	2	23.0769		SUBCELLULAR LOCATION: Cytoplasm. Membrane. Golgi apparatus. Cytoplasm, perinuclear region. Golgi apparatus, trans-Golgi network {ECO:0000250}. Endosome {ECO:0000250}. Cytoplasm, cytoskeleton, microtubule organizing center, centrosome. Cell projection, dendrite {ECO:0000250}. Cytoplasmic vesicle {ECO:0000250}. Cell junction, synapse {ECO:0000250}. Cytoplasm, cytoskeleton {ECO:0000250}. Note=Transl…
Q9Y6D5	76	ARFGEF2	BIG2_HUMAN Brefeldin A-inhibited guanine nucleotide-exchange protein 2 OS=Homo sapiens OX=9606 GN=ARFGEF2 PE=1 SV=3	ANFIEADKYFLPFELAC#QSK|ANFIEADKYFLPFELAC#QSK	3|3	0.1|0.09	0.095	0.00707	6	2	8.6758		SUBCELLULAR LOCATION: Cytoplasm. Membrane. Golgi apparatus. Cytoplasm, perinuclear region. Golgi apparatus, trans-Golgi network {ECO:0000250}. Endosome {ECO:0000250}. Cytoplasm, cytoskeleton, microtubule organizing center, centrosome. Cell projection, dendrite {ECO:0000250}. Cytoplasmic vesicle {ECO:0000250}. Cell junction, synapse {ECO:0000250}. Cytoplasm, cytoskeleton {ECO:0000250}. Note=Transl…
Q07960	91	ARHGAP1	RHG01_HUMAN Rho GTPase-activating protein 1 OS=Homo sapiens OX=9606 GN=ARHGAP1 PE=1 SV=1	KIIVFSAC#R IIVFSAC#R|IIVFSAC#R	3|2	0.56|0.455	0.5075	0.07425	5	2	33.665		SUBCELLULAR LOCATION: Cytoplasm.
Q8IWW6	676	ARHGAP12	RHG12_HUMAN Rho GTPase-activating protein 12 OS=Homo sapiens OX=9606 GN=ARHGAP12 PE=1 SV=1	LC#IEHVEEHGLDIDGIYR|LC#IEHVEEHGLDIDGIYR	1|1	1.07|0.23	0.65	0.59397	2	2	39.3939
Q8IWW6	281	ARHGAP12	RHG12_HUMAN Rho GTPase-activating protein 12 OS=Homo sapiens OX=9606 GN=ARHGAP12 PE=1 SV=1	C#YYYNR|C#YYYNR	2|2	0.16|0.115	0.1375	0.03182	4	2	12.0879
Q8IWW6	662	ARHGAP12	RHG12_HUMAN Rho GTPase-activating protein 12 OS=Homo sapiens OX=9606 GN=ARHGAP12 PE=1 SV=1	|GYIKDQVFGSNLANLC#QR	|1	|0.00098	0.00098	NA	1	1	0
Q68EM7	190	ARHGAP17	RHG17_HUMAN Rho GTPase-activating protein 17 OS=Homo sapiens OX=9606 GN=ARHGAP17 PE=1 SV=1	IDTLKEEMDEAGNKVEQC#K|	2|	8.425|	8.425	NA	2	1	89.3899		SUBCELLULAR LOCATION: Membrane; Peripheral membrane protein. Cytoplasm. Cell junction, tight junction. Note=Associates with membranes and concentrates at sites of cell-cell contact.
Q68EM7	97	ARHGAP17	RHG17_HUMAN Rho GTPase-activating protein 17 OS=Homo sapiens OX=9606 GN=ARHGAP17 PE=1 SV=1	MLETC#GDAENQLALELSQHEVFVEK|MLETC#GDAENQLALELSQHEVFVEK	1|1	0.00098|0.79	0.39549	0.55792	2	2	28.3406		SUBCELLULAR LOCATION: Membrane; Peripheral membrane protein. Cytoplasm. Cell junction, tight junction. Note=Associates with membranes and concentrates at sites of cell-cell contact.
Q68EM7	305	ARHGAP17	RHG17_HUMAN Rho GTPase-activating protein 17 OS=Homo sapiens OX=9606 GN=ARHGAP17 PE=1 SV=1	AALDC#STSHLDEFYSDPHAVAGALK|AALDC#STSHLDEFYSDPHAVAGALK	2|2	0.415|0.245	0.33	0.12021	4	2	24.812		SUBCELLULAR LOCATION: Membrane; Peripheral membrane protein. Cytoplasm. Cell junction, tight junction. Note=Associates with membranes and concentrates at sites of cell-cell contact.
Q68EM7	53	ARHGAP17	RHG17_HUMAN Rho GTPase-activating protein 17 OS=Homo sapiens OX=9606 GN=ARHGAP17 PE=1 SV=1	LVAC#FQGQHGTDAER|	2|	0.09|	0.09	NA	2	1	8.25688		SUBCELLULAR LOCATION: Membrane; Peripheral membrane protein. Cytoplasm. Cell junction, tight junction. Note=Associates with membranes and concentrates at sites of cell-cell contact.
Q8N392	377	ARHGAP18	RHG18_HUMAN Rho GTPase-activating protein 18 OS=Homo sapiens OX=9606 GN=ARHGAP18 PE=1 SV=3	NLC#QELEAK|NLC#QELEAK	1|1	0.96|0.06	0.51	0.6364	2	2	33.7748		SUBCELLULAR LOCATION: Cytoplasm {ECO:0000269|PubMed:21865595}.
Q5T5U3	603	ARHGAP21	RHG21_HUMAN Rho GTPase-activating protein 21 OS=Homo sapiens OX=9606 GN=ARHGAP21 PE=1 SV=2	NFQTTC#GMSLPR|	1|	0.3|	0.3	NA	1	1	23.0769		SUBCELLULAR LOCATION: Golgi apparatus membrane; Peripheral membrane protein. Cell junction. Cytoplasmic vesicle membrane; Peripheral membrane protein. Cytoplasm, cytoskeleton. Note=Localization to the Golgi is dependent on interaction with GTP-bound ARF1.
Q9UNA1	142	ARHGAP26	RHG26_HUMAN Rho GTPase-activating protein 26 OS=Homo sapiens OX=9606 GN=ARHGAP26 PE=1 SV=1	|YC#GILEK	|1	|0.25	0.25	NA	1	1	20		SUBCELLULAR LOCATION: Cell junction, focal adhesion {ECO:0000250}. Cytoplasm, cytoskeleton {ECO:0000250}. Note=Colocalizes with actin stress fibers and cortical actin structures. {ECO:0000250}.
Q6ZUM4	830	ARHGAP27	RHG27_HUMAN Rho GTPase-activating protein 27 OS=Homo sapiens OX=9606 GN=ARHGAP27 PE=1 SV=3	|MLFQHLC#R	|1	|1.19	1.19	NA	1	1	54.3379		SUBCELLULAR LOCATION: Cytoplasm {ECO:0000250}. Membrane {ECO:0000250}; Peripheral membrane protein {ECO:0000250}.
Q9NRY4	924	ARHGAP35	RHG35_HUMAN Rho GTPase-activating protein 35 OS=Homo sapiens OX=9606 GN=ARHGAP35 PE=1 SV=3	FTSIPC#SQPQHK|FTSIPC#SQPQHK	1|2	3.23|2.025	2.6275	0.85206	3	2	72.4328		SUBCELLULAR LOCATION: Cytoplasm, cytoskeleton, cilium basal body {ECO:0000250|UniProtKB:Q91YM2}. Cytoplasm {ECO:0000250|UniProtKB:Q91YM2}. Nucleus {ECO:0000305|PubMed:1894621}. Cell membrane {ECO:0000250|UniProtKB:Q91YM2}. Note=In response to integrins and SDC4 and upon phosphorylation by PKC, relocalizes from the cytoplasm to regions of plasma membrane ruffling where it colocalizes with polymeri…
Q9NRY4	814	ARHGAP35	RHG35_HUMAN Rho GTPase-activating protein 35 OS=Homo sapiens OX=9606 GN=ARHGAP35 PE=1 SV=3	SSHC#GSNNSVLLELPIGLHK|SSHC#GSNNSVLLELPIGLHK	1|3	0.06|0.04	0.05	0.01414	4	2	4.7619		SUBCELLULAR LOCATION: Cytoplasm, cytoskeleton, cilium basal body {ECO:0000250|UniProtKB:Q91YM2}. Cytoplasm {ECO:0000250|UniProtKB:Q91YM2}. Nucleus {ECO:0000305|PubMed:1894621}. Cell membrane {ECO:0000250|UniProtKB:Q91YM2}. Note=In response to integrins and SDC4 and upon phosphorylation by PKC, relocalizes from the cytoplasm to regions of plasma membrane ruffling where it colocalizes with polymeri…
Q9NRY4	620	ARHGAP35	RHG35_HUMAN Rho GTPase-activating protein 35 OS=Homo sapiens OX=9606 GN=ARHGAP35 PE=1 SV=3	ALC#TNDDKYVIDGK|ALC#TNDDKYVIDGK	1|1	0.00098|0.00098	0.00098	0	2	2	0		SUBCELLULAR LOCATION: Cytoplasm, cytoskeleton, cilium basal body {ECO:0000250|UniProtKB:Q91YM2}. Cytoplasm {ECO:0000250|UniProtKB:Q91YM2}. Nucleus {ECO:0000305|PubMed:1894621}. Cell membrane {ECO:0000250|UniProtKB:Q91YM2}. Note=In response to integrins and SDC4 and upon phosphorylation by PKC, relocalizes from the cytoplasm to regions of plasma membrane ruffling where it colocalizes with polymeri…
Q13017	1027	ARHGAP5	RHG05_HUMAN Rho GTPase-activating protein 5 OS=Homo sapiens OX=9606 GN=ARHGAP5 PE=1 SV=2	|LDLEGNEYPIHSTPNC#HDHER	|1	|0.54	0.54	NA	1	1	35.0649		SUBCELLULAR LOCATION: Cytoplasm {ECO:0000269|PubMed:8537347}. Cell membrane {ECO:0000269|PubMed:8537347}; Peripheral membrane protein {ECO:0000269|PubMed:8537347}. Note=Also membrane-associated in a fibrillar pattern that colocalizes with the alpha5-beta1 integrin receptor (ITGA5/ITGB1) for fibronectin. {ECO:0000269|PubMed:8537347}.
Q92888	752	ARHGEF1	ARHG1_HUMAN Rho guanine nucleotide exchange factor 1 OS=Homo sapiens OX=9606 GN=ARHGEF1 PE=1 SV=2	KNWC#ALITETAGSLK NWC#ALITETAGSLK|KNWC#ALITETAGSLK NWC#ALITETAGSLK	3|3	1.02|1.08	1.05	0.04243	6	2	51.2195		SUBCELLULAR LOCATION: Cytoplasm {ECO:0000269|PubMed:10747909}. Membrane {ECO:0000269|PubMed:10747909}. Note=Translocated to the membrane by activated GNA13 or LPA stimulation.
Q92888	537	ARHGEF1	ARHG1_HUMAN Rho guanine nucleotide exchange factor 1 OS=Homo sapiens OX=9606 GN=ARHGEF1 PE=1 SV=2	FC#AFVQEAESRPR|FC#AFVQEAESRPR	2|3	0.14|0.05	0.095	0.06364	5	2	8.6758		SUBCELLULAR LOCATION: Cytoplasm {ECO:0000269|PubMed:10747909}. Membrane {ECO:0000269|PubMed:10747909}. Note=Translocated to the membrane by activated GNA13 or LPA stimulation.
O15013	533	ARHGEF10	ARHGA_HUMAN Rho guanine nucleotide exchange factor 10 OS=Homo sapiens OX=9606 GN=ARHGEF10 PE=1 SV=4	TC#ATKPAFLEFLK|TC#ATKPAFLEFLK	1|1	0.00098|0.00098	0.00098	0	2	2	0
O15085	402	ARHGEF11	ARHGB_HUMAN Rho guanine nucleotide exchange factor 11 OS=Homo sapiens OX=9606 GN=ARHGEF11 PE=1 SV=1	GVLC#EAQEAAMPEIQEQIHDYR|	1|	0.32|	0.32	NA	1	1	24.2424		SUBCELLULAR LOCATION: Cytoplasm {ECO:0000269|PubMed:10900204}. Membrane {ECO:0000269|PubMed:10900204}. Note=Translocated to the membrane upon stimulation.
Q9NZN5	784	ARHGEF12	ARHGC_HUMAN Rho guanine nucleotide exchange factor 12 OS=Homo sapiens OX=9606 GN=ARHGEF12 PE=1 SV=1	EVLLGLKPC#EIK|EVLLGLKPC#EIK	4|3	0.00098|0.00098	0.00098	0	7	2	0		SUBCELLULAR LOCATION: Cytoplasm {ECO:0000305}. Membrane {ECO:0000305}. Note=Translocated to the membrane upon stimulation. {ECO:0000305}.
Q6ZSZ5	554	ARHGEF18	ARHGI_HUMAN Rho guanine nucleotide exchange factor 18 OS=Homo sapiens OX=9606 GN=ARHGEF18 PE=1 SV=4	|YGVFC#SGHNEAVSHYK	|1	|3.31	3.31	NA	1	1	76.7981		SUBCELLULAR LOCATION: Cytoplasm {ECO:0000269|PubMed:15558029}. Cytoplasm, cytoskeleton {ECO:0000269|PubMed:15558029}. Cell membrane {ECO:0000269|PubMed:29601110}. Apical cell membrane {ECO:0000269|PubMed:22006950}. Note=In unactivated eosinophils, distributed around the cell periphery in the perimembranous region (PubMed:29601110). In activated eosinophils, relocates to the tip of the nucleopod, …
Q6ZSZ5	494	ARHGEF18	ARHGI_HUMAN Rho guanine nucleotide exchange factor 18 OS=Homo sapiens OX=9606 GN=ARHGEF18 PE=1 SV=4	|LFPC#ADDLLETHSHFLAR	|1	|0.74	0.74	NA	1	1	42.5287		SUBCELLULAR LOCATION: Cytoplasm {ECO:0000269|PubMed:15558029}. Cytoplasm, cytoskeleton {ECO:0000269|PubMed:15558029}. Cell membrane {ECO:0000269|PubMed:29601110}. Apical cell membrane {ECO:0000269|PubMed:22006950}. Note=In unactivated eosinophils, distributed around the cell periphery in the perimembranous region (PubMed:29601110). In activated eosinophils, relocates to the tip of the nucleopod, …
Q92974	342	ARHGEF2	ARHG2_HUMAN Rho guanine nucleotide exchange factor 2 OS=Homo sapiens OX=9606 GN=ARHGEF2 PE=1 SV=4	|TYSEFC#SR	|1	|0.17	0.17	NA	1	1	14.5299		SUBCELLULAR LOCATION: Cytoplasm, cytoskeleton {ECO:0000269|PubMed:11912491, ECO:0000269|PubMed:21887730, ECO:0000269|PubMed:9857026}. Cytoplasm {ECO:0000269|PubMed:15827085, ECO:0000269|PubMed:21887730}. Cell junction, tight junction {ECO:0000269|PubMed:19043560}. Golgi apparatus {ECO:0000269|PubMed:15827085}. Cytoplasm, cytoskeleton, spindle {ECO:0000269|PubMed:17488622}. Cell projection, ruffle…
Q92974	383	ARHGEF2	ARHG2_HUMAN Rho guanine nucleotide exchange factor 2 OS=Homo sapiens OX=9606 GN=ARHGEF2 PE=1 SV=4	HGVQEC#ILLVTQR|HGVQEC#ILLVTQR	2|1	0.00098|0.11	0.05549	0.07709	3	2	5.25727		SUBCELLULAR LOCATION: Cytoplasm, cytoskeleton {ECO:0000269|PubMed:11912491, ECO:0000269|PubMed:21887730, ECO:0000269|PubMed:9857026}. Cytoplasm {ECO:0000269|PubMed:15827085, ECO:0000269|PubMed:21887730}. Cell junction, tight junction {ECO:0000269|PubMed:19043560}. Golgi apparatus {ECO:0000269|PubMed:15827085}. Cytoplasm, cytoskeleton, spindle {ECO:0000269|PubMed:17488622}. Cell projection, ruffle…
Q92974	478	ARHGEF2	ARHG2_HUMAN Rho guanine nucleotide exchange factor 2 OS=Homo sapiens OX=9606 GN=ARHGEF2 PE=1 SV=4	LIHDGC#LLWK|LIHDGC#LLWK	1|1	0.00098|0.00098	0.00098	0	2	2	0		SUBCELLULAR LOCATION: Cytoplasm, cytoskeleton {ECO:0000269|PubMed:11912491, ECO:0000269|PubMed:21887730, ECO:0000269|PubMed:9857026}. Cytoplasm {ECO:0000269|PubMed:15827085, ECO:0000269|PubMed:21887730}. Cell junction, tight junction {ECO:0000269|PubMed:19043560}. Golgi apparatus {ECO:0000269|PubMed:15827085}. Cytoplasm, cytoskeleton, spindle {ECO:0000269|PubMed:17488622}. Cell projection, ruffle…
Q8N1W1	407	ARHGEF28	ARG28_HUMAN Rho guanine nucleotide exchange factor 28 OS=Homo sapiens OX=9606 GN=ARHGEF28 PE=1 SV=3	GC#TLWPQSSK|GC#TLWPQSSK	1|3	0.37|0.61	0.49	0.16971	4	2	32.8859		SUBCELLULAR LOCATION: Cytoplasm {ECO:0000250}. Cell membrane {ECO:0000250}. Note=Colocalizes with the microtubule radial and cortical systems. {ECO:0000250}.
Q8N1W1	1032	ARHGEF28	ARG28_HUMAN Rho guanine nucleotide exchange factor 28 OS=Homo sapiens OX=9606 GN=ARHGEF28 PE=1 SV=3	ALC#LIK|ALC#LIK	1|1	0.06|0.53	0.295	0.33234	2	2	22.7799		SUBCELLULAR LOCATION: Cytoplasm {ECO:0000250}. Cell membrane {ECO:0000250}. Note=Colocalizes with the microtubule radial and cortical systems. {ECO:0000250}.
Q14155	349	ARHGEF7	ARHG7_HUMAN Rho guanine nucleotide exchange factor 7 OS=Homo sapiens OX=9606 GN=ARHGEF7 PE=1 SV=2	VGGC#FLNLMPQMK|	1|	0.73|	0.73	NA	1	1	42.1965		SUBCELLULAR LOCATION: Cell junction, focal adhesion {ECO:0000250}. Cell projection, ruffle {ECO:0000250}. Cytoplasm, cell cortex {ECO:0000250}. Cell projection, lamellipodium {ECO:0000250}. Note=Detected at cell adhesions. A small proportion is detected at focal adhesions.
Q14155	560	ARHGEF7	ARHG7_HUMAN Rho guanine nucleotide exchange factor 7 OS=Homo sapiens OX=9606 GN=ARHGEF7 PE=1 SV=2	ILVSC#NNQQDLQEWVEHLQK|ILVSC#NNQQDLQEWVEHLQK	1|1	0.13|0.11	0.12	0.01414	2	2	10.7143		SUBCELLULAR LOCATION: Cell junction, focal adhesion {ECO:0000250}. Cell projection, ruffle {ECO:0000250}. Cytoplasm, cell cortex {ECO:0000250}. Cell projection, lamellipodium {ECO:0000250}. Note=Detected at cell adhesions. A small proportion is detected at focal adhesions.
O14497	1874	ARID1A	ARI1A_HUMAN AT-rich interactive domain-containing protein 1A OS=Homo sapiens OX=9606 GN=ARID1A PE=1 SV=3	TELLPSRPHAPC#PPAPR|TELLPSRPHAPC#PPAPR	2|2	0.07549|0.04549	0.06049	0.02121	4	2	5.70397		SUBCELLULAR LOCATION: Nucleus {ECO:0000255|PROSITE-ProRule:PRU00355, ECO:0000269|PubMed:11318604, ECO:0000269|PubMed:26614907}.
Q68CP9	711	ARID2	ARID2_HUMAN AT-rich interactive domain-containing protein 2 OS=Homo sapiens OX=9606 GN=ARID2 PE=1 SV=2	APIPC#EVVK|APIPC#EVVK	2|1	0.505|0.6	0.5525	0.06718	3	2	35.5878		SUBCELLULAR LOCATION: Nucleus.
Q68CP9	82	ARID2	ARID2_HUMAN AT-rich interactive domain-containing protein 2 OS=Homo sapiens OX=9606 GN=ARID2 PE=1 SV=2	|SC#SNAAFALK	|1	|0.08	0.08	NA	1	1	7.40741		SUBCELLULAR LOCATION: Nucleus.
Q9Y4X5	347	ARIH1	ARI1_HUMAN E3 ubiquitin-protein ligase ARIH1 OS=Homo sapiens OX=9606 GN=ARIH1 PE=1 SV=2	C#HVTIEK|C#HVTIEK	1|1	0.22|0.68	0.45	0.32527	2	2	31.0345	Metal binding$Mutagenesis	SUBCELLULAR LOCATION: Cytoplasm {ECO:0000269|PubMed:11278816, ECO:0000269|PubMed:21590270, ECO:0000269|PubMed:23059369}. Nucleus {ECO:0000269|PubMed:23059369}. Nucleus, Cajal body {ECO:0000269|PubMed:23059369}. Note=Mainly cytoplasmic (PubMed:11278816). Present in Lewy body (PubMed:21590270). {ECO:0000269|PubMed:11278816, ECO:0000269|PubMed:21590270}.	Note=Zinc 5;Ontology_term=ECO:0000244,ECO:0000244,ECO:0000244,ECO:0000244,ECO:0000255,ECO:0000269,ECO:0000269,ECO:0000269;evidence=ECO:0000244|PDB:1WD2,ECO:0000244|PDB:2M9Y,ECO:0000244|PDB:4KBL,ECO:0000244|PDB:4KC9,ECO:0000255|PROSITE-ProRule:PRU01221,ECO:0000269|PubMed:15236971,ECO:0000269|PubMed:23707686,ECO:0000269|PubMed:24058416;Dbxref=PMID:15236971,PMID:23707686,PMID:24058416$Note=Impairs z…
Q9Y4X5	418	ARIH1	ARI1_HUMAN E3 ubiquitin-protein ligase ARIH1 OS=Homo sapiens OX=9606 GN=ARIH1 PE=1 SV=2	YLFYC#NR|YLFYC#NR	1|1	0.53|1.29	0.91	0.5374	2	2	47.644		SUBCELLULAR LOCATION: Cytoplasm {ECO:0000269|PubMed:11278816, ECO:0000269|PubMed:21590270, ECO:0000269|PubMed:23059369}. Nucleus {ECO:0000269|PubMed:23059369}. Nucleus, Cajal body {ECO:0000269|PubMed:23059369}. Note=Mainly cytoplasmic (PubMed:11278816). Present in Lewy body (PubMed:21590270). {ECO:0000269|PubMed:11278816, ECO:0000269|PubMed:21590270}.
Q9Y4X5	269	ARIH1	ARI1_HUMAN E3 ubiquitin-protein ligase ARIH1 OS=Homo sapiens OX=9606 GN=ARIH1 PE=1 SV=2	|YQHLITNSFVEC#NR	|1	|0.06	0.06	NA	1	1	5.66038		SUBCELLULAR LOCATION: Cytoplasm {ECO:0000269|PubMed:11278816, ECO:0000269|PubMed:21590270, ECO:0000269|PubMed:23059369}. Nucleus {ECO:0000269|PubMed:23059369}. Nucleus, Cajal body {ECO:0000269|PubMed:23059369}. Note=Mainly cytoplasmic (PubMed:11278816). Present in Lewy body (PubMed:21590270). {ECO:0000269|PubMed:11278816, ECO:0000269|PubMed:21590270}.
Q9Y4X5	161	ARIH1	ARI1_HUMAN E3 ubiquitin-protein ligase ARIH1 OS=Homo sapiens OX=9606 GN=ARIH1 PE=1 SV=2	LFAEC#HVINPSK|LFAEC#HVINPSK	3|5	0.02|0.01	0.015	0.00707	8	2	1.47783		SUBCELLULAR LOCATION: Cytoplasm {ECO:0000269|PubMed:11278816, ECO:0000269|PubMed:21590270, ECO:0000269|PubMed:23059369}. Nucleus {ECO:0000269|PubMed:23059369}. Nucleus, Cajal body {ECO:0000269|PubMed:23059369}. Note=Mainly cytoplasmic (PubMed:11278816). Present in Lewy body (PubMed:21590270). {ECO:0000269|PubMed:11278816, ECO:0000269|PubMed:21590270}.
O95376	270	ARIH2	ARI2_HUMAN E3 ubiquitin-protein ligase ARIH2 OS=Homo sapiens OX=9606 GN=ARIH2 PE=1 SV=1	QMYHAPTDC#ATIR|QMYHAPTDC#ATIR	4|3	0.28|0.84	0.56	0.39598	7	2	35.8974	Metal binding	SUBCELLULAR LOCATION: Nucleus {ECO:0000269|PubMed:16118314}. Cytoplasm {ECO:0000269|PubMed:19340006}.	Note=Zinc 4;Ontology_term=ECO:0000255;evidence=ECO:0000255|PROSITE-ProRule:PRU01221
Q9NXU5	17	ARL15	ARL15_HUMAN ADP-ribosylation factor-like protein 15 OS=Homo sapiens OX=9606 GN=ARL15 PE=1 SV=1	DYLC#FR|	1|	0.07|	0.07	NA	1	1	6.54206
P36405	118	ARL3	ARL3_HUMAN ADP-ribosylation factor-like protein 3 OS=Homo sapiens OX=9606 GN=ARL3 PE=1 SV=2	LSC#VPVLIFANK|LSC#VPVLIFANK	3|4	0.01|0.01	0.01	0	7	2	0.990099		SUBCELLULAR LOCATION: Golgi apparatus membrane; Peripheral membrane protein; Cytoplasmic side. Cytoplasm, cytoskeleton, spindle. Nucleus. Cytoplasm, cytoskeleton, microtubule organizing center, centrosome. Cytoplasm. Cell projection, cilium {ECO:0000269|PubMed:30269812}. Note=Detected predominantly in the photoreceptor connecting cilium. Present on the mitotic spindle. Centrosome-associated throu…
P56559	64	ARL4C	ARL4C_HUMAN ADP-ribosylation factor-like protein 4C OS=Homo sapiens OX=9606 GN=ARL4C PE=1 SV=1	GISC#HFWDVGGQEK|GISC#HFWDVGGQEK	5|4	0.07|0.095	0.0825	0.01768	9	2	7.62125		SUBCELLULAR LOCATION: Cell projection, filopodium. Cell membrane. Cytoplasm.
Q9H0F7	148	ARL6	ARL6_HUMAN ADP-ribosylation factor-like protein 6 OS=Homo sapiens OX=9606 GN=ARL6 PE=1 SV=1	VSQLLC#LENIK|	1|	0.74|	0.74	NA	1	1	42.5287		SUBCELLULAR LOCATION: Cell projection, cilium membrane; Peripheral membrane protein; Cytoplasmic side. Cytoplasm, cytoskeleton, cilium axoneme. Cytoplasm, cytoskeleton, cilium basal body. Note=Appears in a pattern of punctae flanking the microtubule axoneme that likely correspond to small membrane-associated patches. Localizes to the so-called ciliary gate where vesicles carrying ciliary cargo fu…
Q15041	109	ARL6IP1	AR6P1_HUMAN ADP-ribosylation factor-like protein 6-interacting protein 1 OS=Homo sapiens OX=9606 GN=ARL6IP1 PE=1 SV=2	FHEIC#SNLVK|FHEIC#SNLVK	2|2	0.14549|0.04549	0.09549	0.07071	4	2	8.71665		SUBCELLULAR LOCATION: Endomembrane system {ECO:0000269|PubMed:10995579}; Multi-pass membrane protein {ECO:0000269|PubMed:10995579}. Endoplasmic reticulum membrane {ECO:0000269|PubMed:12754298, ECO:0000269|PubMed:24076029, ECO:0000269|PubMed:24262037}; Multi-pass membrane protein {ECO:0000269|PubMed:24076029}. Endoplasmic reticulum {ECO:0000250|UniProtKB:Q9JKW0}. Note=Predominantly localized to in…
Q66PJ3	410	ARL6IP4	AR6P4_HUMAN ADP-ribosylation factor-like protein 6-interacting protein 4 OS=Homo sapiens OX=9606 GN=ARL6IP4 PE=1 SV=2	GDC#LAFQMR|GDC#LAFQMR	1|1	0.08|0.41	0.245	0.23335	2	2	19.6787		SUBCELLULAR LOCATION: Nucleus, nucleolus {ECO:0000269|PubMed:19582790}. Nucleus speckle {ECO:0000269|PubMed:19582790}.
Q6NXE6	435	ARMC6	ARMC6_HUMAN Armadillo repeat-containing protein 6 OS=Homo sapiens OX=9606 GN=ARMC6 PE=1 SV=2	|QAC#MLIR	|1	|0.21	0.21	NA	1	1	17.3554
Q6NXE6	484	ARMC6	ARMC6_HUMAN Armadillo repeat-containing protein 6 OS=Homo sapiens OX=9606 GN=ARMC6 PE=1 SV=2	|DLGC#HVELR	|1	|0.00098	0.00098	NA	1	1	0
Q8IUR7	283	ARMC8	ARMC8_HUMAN Armadillo repeat-containing protein 8 OS=Homo sapiens OX=9606 GN=ARMC8 PE=1 SV=2	TLPC#LVR|TLPC#LVR	1|1	0.05|0.06	0.055	0.00707	2	2	5.21327		SUBCELLULAR LOCATION: Nucleus {ECO:0000269|PubMed:17467196}. Cytoplasm {ECO:0000269|PubMed:17467196}.
Q92747	279	ARPC1A	ARC1A_HUMAN Actin-related protein 2/3 complex subunit 1A OS=Homo sapiens OX=9606 GN=ARPC1A PE=2 SV=2	GC#LTFVSK|GC#LTFVSK	2|2	0.78|1.51	1.145	0.51619	4	2	53.38		SUBCELLULAR LOCATION: Cytoplasm, cytoskeleton {ECO:0000269|PubMed:8978670}. Nucleus {ECO:0000250|UniProtKB:Q8AVT9}.
Q92747	13	ARPC1A	ARC1A_HUMAN Actin-related protein 2/3 complex subunit 1A OS=Homo sapiens OX=9606 GN=ARPC1A PE=2 SV=2	|LLEPITC#HAWNR	|1	|0.00098	0.00098	NA	1	1	0		SUBCELLULAR LOCATION: Cytoplasm, cytoskeleton {ECO:0000269|PubMed:8978670}. Nucleus {ECO:0000250|UniProtKB:Q8AVT9}.
O15143	227	ARPC1B	ARC1B_HUMAN Actin-related protein 2/3 complex subunit 1B OS=Homo sapiens OX=9606 GN=ARPC1B PE=1 SV=3	VAWVSHDSTVC#LADADKK VAWVSHDSTVC#LADADK|VAWVSHDSTVC#LADADKK VAWVSHDSTVC#LADADK	2|4	4.98|1.285	3.1325	2.61276	6	2	75.8016		SUBCELLULAR LOCATION: Cytoplasm, cytoskeleton {ECO:0000269|PubMed:11741539, ECO:0000269|PubMed:9230079}. Nucleus {ECO:0000269|PubMed:29925947}.
O15143	13	ARPC1B	ARC1B_HUMAN Actin-related protein 2/3 complex subunit 1B OS=Homo sapiens OX=9606 GN=ARPC1B PE=1 SV=3	VEPISC#HAWNK LVEPISC#HAWNK HSFLVEPISC#HAWNK SFLVEPISC#HAWNK|VEPISC#HAWNK SFLVEPISC#HAWNK	7|3	0.25|0.42	0.335	0.12021	10	2	25.0936		SUBCELLULAR LOCATION: Cytoplasm, cytoskeleton {ECO:0000269|PubMed:11741539, ECO:0000269|PubMed:9230079}. Nucleus {ECO:0000269|PubMed:29925947}.
O15143	26	ARPC1B	ARC1B_HUMAN Actin-related protein 2/3 complex subunit 1B OS=Homo sapiens OX=9606 GN=ARPC1B PE=1 SV=3	TQIAIC#PNNHEVHIYEK|TQIAIC#PNNHEVHIYEK	6|4	0.06|0.155	0.1075	0.06718	10	2	9.70655		SUBCELLULAR LOCATION: Cytoplasm, cytoskeleton {ECO:0000269|PubMed:11741539, ECO:0000269|PubMed:9230079}. Nucleus {ECO:0000269|PubMed:29925947}.
O15144	120	ARPC2	ARPC2_HUMAN Actin-related protein 2/3 complex subunit 2 OS=Homo sapiens OX=9606 GN=ARPC2 PE=1 SV=1	NC#FASVFEK|NC#FASVFEK	4|3	0.045|0.03	0.0375	0.01061	7	2	3.61446		SUBCELLULAR LOCATION: Cytoplasm, cytoskeleton {ECO:0000269|PubMed:9230079}. Cell projection {ECO:0000269|PubMed:9230079}. Cell junction, synapse, synaptosome {ECO:0000250|UniProtKB:Q9CVB6}. Nucleus {ECO:0000269|PubMed:29925947}.
O15145	162	ARPC3	ARPC3_HUMAN Actin-related protein 2/3 complex subunit 3 OS=Homo sapiens OX=9606 GN=ARPC3 PE=1 SV=3	WWTC#FVK|VFDPQNDKPSKWWTC#FVK WWTC#FVK	1|2	0.43|0.855	0.6425	0.30052	3	2	39.1172		SUBCELLULAR LOCATION: Cytoplasm, cytoskeleton {ECO:0000269|PubMed:9230079, ECO:0000269|PubMed:9359840}. Cell projection {ECO:0000269|PubMed:9230079, ECO:0000269|PubMed:9359840}. Nucleus {ECO:0000269|PubMed:29925947}.
P59998	21	ARPC4	ARPC4_HUMAN Actin-related protein 2/3 complex subunit 4 OS=Homo sapiens OX=9606 GN=ARPC4 PE=1 SV=3	ATLQAALC#LENFSSQVVER|	1|	0.13|	0.13	NA	1	1	11.5044		SUBCELLULAR LOCATION: Cytoplasm, cytoskeleton {ECO:0000269|PubMed:9359840}. Cell projection {ECO:0000269|PubMed:9359840}. Nucleus {ECO:0000269|PubMed:29925947}.
P51690	492	ARSE	ARSE_HUMAN Arylsulfatase E OS=Homo sapiens OX=9606 GN=ARSE PE=1 SV=2	VHFVTPVFQPEGAGAC#YGR|	1|	0.00098|	0.00098	NA	1	1	0		SUBCELLULAR LOCATION: Golgi apparatus, Golgi stack.
Q9HBK9	226	AS3MT	AS3MT_HUMAN Arsenite methyltransferase OS=Homo sapiens OX=9606 GN=AS3MT PE=1 SV=3	|IGFC#PPR	|1	|0.8	0.8	NA	1	1	44.4444		SUBCELLULAR LOCATION: Cytoplasm, cytosol {ECO:0000250|UniProtKB:Q8VHT6}.
Q9HBK9	271	AS3MT	AS3MT_HUMAN Arsenite methyltransferase OS=Homo sapiens OX=9606 GN=AS3MT PE=1 SV=3	C#QVIYNGGITGHEK|C#QVIYNGGITGHEK	2|2	0.595|0.34	0.4675	0.18031	4	2	31.8569		SUBCELLULAR LOCATION: Cytoplasm, cytosol {ECO:0000250|UniProtKB:Q8VHT6}.
Q9ULH1	373	ASAP1	ASAP1_HUMAN Arf-GAP with SH3 domain, ANK repeat and PH domain-containing protein 1 OS=Homo sapiens OX=9606 GN=ASAP1 PE=1 SV=4	LNLLTC#QVKPNAEDK|LNLLTC#QVKPNAEDK	1|1	0.6|0.08	0.34	0.3677	2	2	25.3731		SUBCELLULAR LOCATION: Cytoplasm {ECO:0000250}. Membrane {ECO:0000250}. Note=Predominantly cytoplasmic. Partially membrane-associated. {ECO:0000250}.
Q9ULH1	740	ASAP1	ASAP1_HUMAN Arf-GAP with SH3 domain, ANK repeat and PH domain-containing protein 1 OS=Homo sapiens OX=9606 GN=ASAP1 PE=1 SV=4	SPRPQSFC#HSSSISPQDK|SPRPQSFC#HSSSISPQDK PQSFC#HSSSISPQDK	1|2	0.19|0.47	0.33	0.19799	3	2	24.812		SUBCELLULAR LOCATION: Cytoplasm {ECO:0000250}. Membrane {ECO:0000250}. Note=Predominantly cytoplasmic. Partially membrane-associated. {ECO:0000250}.
O43150	365	ASAP2	ASAP2_HUMAN Arf-GAP with SH3 domain, ANK repeat and PH domain-containing protein 2 OS=Homo sapiens OX=9606 GN=ASAP2 PE=1 SV=3	C#FDLISHDR|C#FDLISHDR	2|2	4.88049|7.795	6.33774	2.06087	4	2	86.3718		SUBCELLULAR LOCATION: Cytoplasm. Golgi apparatus, Golgi stack membrane; Peripheral membrane protein. Cell membrane; Peripheral membrane protein. Note=Colocalizes with F-actin and ARF6 in phagocytic cups.
Q96DX5	175	ASB9	ASB9_HUMAN Ankyrin repeat and SOCS box protein 9 OS=Homo sapiens OX=9606 GN=ASB9 PE=1 SV=1	ISHLGTPLYLAC#ENQQR|ISHLGTPLYLAC#ENQQR	2|2	0.155|0.59	0.3725	0.30759	4	2	27.1403		SUBCELLULAR LOCATION: Mitochondrion {ECO:0000269|PubMed:20302626}.
Q96DX5	149	ASB9	ASB9_HUMAN Ankyrin repeat and SOCS box protein 9 OS=Homo sapiens OX=9606 GN=ASB9 PE=1 SV=1	GHVEC#VNSLIAYGGNIDHK|GHVEC#VNSLIAYGGNIDHK	1|2	0.21|0.00098	0.10549	0.1478	3	2	9.54237		SUBCELLULAR LOCATION: Mitochondrion {ECO:0000269|PubMed:20302626}.
Q8N3C0	208	ASCC3	ASCC3_HUMAN Activating signal cointegrator 1 complex subunit 3 OS=Homo sapiens OX=9606 GN=ASCC3 PE=1 SV=3	FLNEHLQEAC#TPELKPVEK|FLNEHLQEAC#TPELKPVEK	2|1	7.6|8.25	7.925	0.45962	3	2	88.7955		SUBCELLULAR LOCATION: Nucleus {ECO:0000269|PubMed:12077347, ECO:0000269|PubMed:29144457}. Nucleus speckle {ECO:0000269|PubMed:29144457, ECO:0000269|PubMed:29997253}. Note=Colocalizes with ALKBH3 and ASCC2 in nuclear foci when cells have been exposed to alkylating agents that cause DNA damage. {ECO:0000269|PubMed:29144457}.
Q8N3C0	742	ASCC3	ASCC3_HUMAN Activating signal cointegrator 1 complex subunit 3 OS=Homo sapiens OX=9606 GN=ASCC3 PE=1 SV=3	NC#GHIPFFFPTQGHDYVLAEK|NC#GHIPFFFPTQGHDYVLAEK	3|1	0.38|2.42	1.4	1.4425	4	2	58.3333		SUBCELLULAR LOCATION: Nucleus {ECO:0000269|PubMed:12077347, ECO:0000269|PubMed:29144457}. Nucleus speckle {ECO:0000269|PubMed:29144457, ECO:0000269|PubMed:29997253}. Note=Colocalizes with ALKBH3 and ASCC2 in nuclear foci when cells have been exposed to alkylating agents that cause DNA damage. {ECO:0000269|PubMed:29144457}.
Q8N3C0	2003	ASCC3	ASCC3_HUMAN Activating signal cointegrator 1 complex subunit 3 OS=Homo sapiens OX=9606 GN=ASCC3 PE=1 SV=3	TSIESLPELIHAC#GGK|TSIESLPELIHAC#GGK	3|5	0.37|0.67	0.52	0.21213	8	2	34.2105		SUBCELLULAR LOCATION: Nucleus {ECO:0000269|PubMed:12077347, ECO:0000269|PubMed:29144457}. Nucleus speckle {ECO:0000269|PubMed:29144457, ECO:0000269|PubMed:29997253}. Note=Colocalizes with ALKBH3 and ASCC2 in nuclear foci when cells have been exposed to alkylating agents that cause DNA damage. {ECO:0000269|PubMed:29144457}.
Q8N3C0	1315	ASCC3	ASCC3_HUMAN Activating signal cointegrator 1 complex subunit 3 OS=Homo sapiens OX=9606 GN=ASCC3 PE=1 SV=3	HPPHTELLDLQPLPITALGC#K|	1|	0.33|	0.33	NA	1	1	24.812		SUBCELLULAR LOCATION: Nucleus {ECO:0000269|PubMed:12077347, ECO:0000269|PubMed:29144457}. Nucleus speckle {ECO:0000269|PubMed:29144457, ECO:0000269|PubMed:29997253}. Note=Colocalizes with ALKBH3 and ASCC2 in nuclear foci when cells have been exposed to alkylating agents that cause DNA damage. {ECO:0000269|PubMed:29144457}.
Q8N3C0	324	ASCC3	ASCC3_HUMAN Activating signal cointegrator 1 complex subunit 3 OS=Homo sapiens OX=9606 GN=ASCC3 PE=1 SV=3	ILGENAKPNYGC#QVTIQSEQEK|ILGENAKPNYGC#QVTIQSEQEK	1|3	0.23|0.14	0.185	0.06364	4	2	15.6118		SUBCELLULAR LOCATION: Nucleus {ECO:0000269|PubMed:12077347, ECO:0000269|PubMed:29144457}. Nucleus speckle {ECO:0000269|PubMed:29144457, ECO:0000269|PubMed:29997253}. Note=Colocalizes with ALKBH3 and ASCC2 in nuclear foci when cells have been exposed to alkylating agents that cause DNA damage. {ECO:0000269|PubMed:29144457}.
Q8N3C0	1874	ASCC3	ASCC3_HUMAN Activating signal cointegrator 1 complex subunit 3 OS=Homo sapiens OX=9606 GN=ASCC3 PE=1 SV=3	|C#LPIESNPHSFDSPHTK	|1	|0.00098	0.00098	NA	1	1	0		SUBCELLULAR LOCATION: Nucleus {ECO:0000269|PubMed:12077347, ECO:0000269|PubMed:29144457}. Nucleus speckle {ECO:0000269|PubMed:29144457, ECO:0000269|PubMed:29997253}. Note=Colocalizes with ALKBH3 and ASCC2 in nuclear foci when cells have been exposed to alkylating agents that cause DNA damage. {ECO:0000269|PubMed:29144457}.
Q9UBL3	207	ASH2L	ASH2L_HUMAN Set1/Ash2 histone methyltransferase complex subunit ASH2 OS=Homo sapiens OX=9606 GN=ASH2L PE=1 SV=1	YWEC#MTTR|YWEC#MTTR	1|1	0.13|0.19	0.16	0.04243	2	2	13.7931		SUBCELLULAR LOCATION: Nucleus {ECO:0000305|PubMed:17355966}.
O95671	4	ASMTL	ASML_HUMAN Probable bifunctional dTTP/UTP pyrophosphatase/methyltransferase protein OS=Homo sapiens OX=9606 GN=ASMTL PE=1 SV=3	VLC#PVIGK|VLC#PVIGK	1|1	0.63|0.55	0.59	0.05657	2	2	37.1069
O95671	274	ASMTL	ASML_HUMAN Probable bifunctional dTTP/UTP pyrophosphatase/methyltransferase protein OS=Homo sapiens OX=9606 GN=ASMTL PE=1 SV=3	AEAGEAGQATAEAEC#HR|AEAGEAGQATAEAEC#HR	1|1	0.11|0.42	0.265	0.2192	2	2	20.9486
O95671	546	ASMTL	ASML_HUMAN Probable bifunctional dTTP/UTP pyrophosphatase/methyltransferase protein OS=Homo sapiens OX=9606 GN=ASMTL PE=1 SV=3	VAESC#KPGAGLLLVETLLDEEKR|VAESC#KPGAGLLLVETLLDEEKR	5|5	0.19|0.08	0.135	0.07778	10	2	11.8943
O43681	289	ASNA1	ASNA_HUMAN ATPase ASNA1 OS=Homo sapiens OX=9606 GN=ASNA1 PE=1 SV=2	IDTHNIIVNQLVFPDPEKPC#K|IDTHNIIVNQLVFPDPEKPC#K	8|8	0.045|0.195	0.12	0.10607	16	2	10.7143	Metal binding	SUBCELLULAR LOCATION: Cytoplasm. Endoplasmic reticulum. Nucleus, nucleolus.	Note=Zinc%3B shared with dimeric partner;Ontology_term=ECO:0000255;evidence=ECO:0000255|HAMAP-Rule:MF_03112
P08243	158	ASNS	ASNS_HUMAN Asparagine synthetase [glutamine-hydrolyzing] OS=Homo sapiens OX=9606 GN=ASNS PE=1 SV=4	AMTEDGFLAVC#SEAK|AMTEDGFLAVC#SEAK	1|2	0.05|0.51	0.28	0.32527	3	2	21.875
Q12797	685	ASPH	ASPH_HUMAN Aspartyl/asparaginyl beta-hydroxylase OS=Homo sapiens OX=9606 GN=ASPH PE=1 SV=3	YSIMHPGTHVWPHTGPTNC#R|YSIMHPGTHVWPHTGPTNC#R	1|2	0.13|0.855	0.4925	0.51265	3	2	32.9983		SUBCELLULAR LOCATION: [Isoform 1]: Endoplasmic reticulum membrane; Single-pass type II membrane protein {ECO:0000250|UniProtKB:Q28056}.; SUBCELLULAR LOCATION: [Isoform 4]: Sarcoplasmic reticulum membrane; Single-pass type II membrane protein {ECO:0000305|PubMed:15485681}.; SUBCELLULAR LOCATION: [Isoform 8]: Endoplasmic reticulum membrane; Single-pass type II membrane protein {ECO:0000269|PubMed:2…
Q9BZE9	325	ASPSCR1	ASPC1_HUMAN Tether containing UBX domain for GLUT4 OS=Homo sapiens OX=9606 GN=ASPSCR1 PE=1 SV=1	ERPVDREPVDREPVVC#HPDLEER|ERPVDREPVDREPVVC#HPDLEER	1|2	0.00098|0.15	0.07549	0.10537	3	2	7.01913		SUBCELLULAR LOCATION: Endomembrane system {ECO:0000250}; Peripheral membrane protein {ECO:0000250}. Endoplasmic reticulum-Golgi intermediate compartment membrane {ECO:0000269|PubMed:22207755}; Peripheral membrane protein. Cytoplasm {ECO:0000269|PubMed:23349634}. Nucleus {ECO:0000269|PubMed:23349634}.
Q7L266	115	ASRGL1	ASGL1_HUMAN Isoaspartyl peptidase/L-asparaginase OS=Homo sapiens OX=9606 GN=ASRGL1 PE=1 SV=2	TPHC#FLTDQGAAQFAAAMGVPEIPGEK|	1|	1.13|	1.13	NA	1	1	53.0516		SUBCELLULAR LOCATION: Cytoplasm {ECO:0000269|PubMed:11984834, ECO:0000269|PubMed:27106100}. Note=Midpiece of sperm tail.
Q8NBU5	137	ATAD1	ATAD1_HUMAN ATPase family AAA domain-containing protein 1 OS=Homo sapiens OX=9606 GN=ATAD1 PE=1 SV=1	GVLLYGPPGC#GK|GVLLYGPPGC#GK	3|4	0.12|0.225	0.1725	0.07425	7	2	14.7122		SUBCELLULAR LOCATION: Peroxisome {ECO:0000250|UniProtKB:Q9D5T0}. Cell junction, synapse, postsynaptic cell membrane {ECO:0000250|UniProtKB:Q9D5T0}.
Q9ULI0	437	ATAD2B	ATD2B_HUMAN ATPase family AAA domain-containing protein 2B OS=Homo sapiens OX=9606 GN=ATAD2B PE=1 SV=3	GC#LFYGPPGTGK|GC#LFYGPPGTGK	1|1	0.1|0.14	0.12	0.02828	2	2	10.7143		SUBCELLULAR LOCATION: Nucleus {ECO:0000269|PubMed:24561620}. Note=Partially localizes to replication sites.
Q96QE3	1430	ATAD5	ATAD5_HUMAN ATPase family AAA domain-containing protein 5 OS=Homo sapiens OX=9606 GN=ATAD5 PE=1 SV=4	|NVQLVC#SEHGLDNK	|1	|0.00098	0.00098	NA	1	1	0	Mutagenesis	SUBCELLULAR LOCATION: Nucleus {ECO:0000305}.	Note=Abolishes RB1 binding. Abolishes RB1 binding%3B when associated with K-1432. Weakly detected after methyl methane-sulfonate (MMS) treatment. Expression detected after MMS treatment%3B when associated with K-1432. Weakly affects the RAD9A interaction after MMS exposure. No effect on the RAD9A interaction after MMS exposure%3B when associated with K-1432. Resists to DNA damage after MMS exposu…
O75143	339	ATG13	ATG13_HUMAN Autophagy-related protein 13 OS=Homo sapiens OX=9606 GN=ATG13 PE=1 SV=1	THC#AATPSSSEDTETVSNSSEGR|THC#AATPSSSEDTETVSNSSEGR	1|1	0.08|0.5	0.29	0.29698	2	2	22.4806		SUBCELLULAR LOCATION: Cytoplasm, cytosol {ECO:0000269|PubMed:19211835}. Preautophagosomal structure {ECO:0000269|PubMed:19211835}. Note=Under starvation conditions, is localized to puncate structures primarily representing the isolation membrane; the isolation membrane sequesters a portion of the cytoplasm resulting in autophagosome formation. {ECO:0000269|PubMed:19211835}.
Q676U5	316	ATG16L1	A16L1_HUMAN Autophagy-related protein 16-1 OS=Homo sapiens OX=9606 GN=ATG16L1 PE=1 SV=2	VPATALC#VFDAHDGEVNAVQFSPGSR|VPATALC#VFDAHDGEVNAVQFSPGSR	1|1	0.82|0.93	0.875	0.07778	2	2	46.6667		SUBCELLULAR LOCATION: Cytoplasm {ECO:0000269|PubMed:23392225}. Preautophagosomal structure membrane {ECO:0000269|PubMed:20639872, ECO:0000269|PubMed:23392225}; Peripheral membrane protein {ECO:0000250}. Note=Recruited to omegasomes membranes by WIPI2. Omegasomes are endoplasmic reticulum connected strutures at the origin of preautophagosomal structures. Localized to preautophagosomal structure (P…
Q96BY7	571	ATG2B	ATG2B_HUMAN Autophagy-related protein 2 homolog B OS=Homo sapiens OX=9606 GN=ATG2B PE=1 SV=5	AVFAEAC#SHDHLR|AVFAEAC#SHDHLR	1|1	3.91|2.52	3.215	0.98288	2	2	76.2752		SUBCELLULAR LOCATION: Preautophagosomal structure membrane {ECO:0000269|PubMed:22219374}; Peripheral membrane protein {ECO:0000269|PubMed:22219374}. Lipid droplet {ECO:0000269|PubMed:22219374}.
O95352	524	ATG7	ATG7_HUMAN Ubiquitin-like modifier-activating enzyme ATG7 OS=Homo sapiens OX=9606 GN=ATG7 PE=1 SV=1	QQGAGDLC#PNHPVASADLLGSSLFANIPGYK|QQGAGDLC#PNHPVASADLLGSSLFANIPGYK	1|1	0.5|0.73	0.615	0.16263	2	2	38.0805		SUBCELLULAR LOCATION: Cytoplasm {ECO:0000250}. Preautophagosomal structure {ECO:0000250}. Note=Localizes also to discrete punctae along the ciliary axoneme and to the base of the ciliary axoneme. {ECO:0000250}.
O95352	406	ATG7	ATG7_HUMAN Ubiquitin-like modifier-activating enzyme ATG7 OS=Homo sapiens OX=9606 GN=ATG7 PE=1 SV=1	QPLYEFEDC#LGGGKPK|QPLYEFEDC#LGGGKPK	3|5	0.14|0.15	0.145	0.00707	8	2	12.6638		SUBCELLULAR LOCATION: Cytoplasm {ECO:0000250}. Preautophagosomal structure {ECO:0000250}. Note=Localizes also to discrete punctae along the ciliary axoneme and to the base of the ciliary axoneme. {ECO:0000250}.
Q7Z3C6	764	ATG9A	ATG9A_HUMAN Autophagy-related protein 9A OS=Homo sapiens OX=9606 GN=ATG9A PE=1 SV=3	SASYPC#AAPR|	1|	0.15|	0.15	NA	1	1	13.0435		SUBCELLULAR LOCATION: Cytoplasmic vesicle, autophagosome membrane; Multi-pass membrane protein. Golgi apparatus, trans-Golgi network membrane; Multi-pass membrane protein. Late endosome membrane; Multi-pass membrane protein. Endoplasmic reticulum membrane; Multi-pass membrane protein. Note=Under amino acid starvation or rapamycin treatment, redistributes from a juxtanuclear clustered pool to a di…
P31939	363	ATIC	PUR9_HUMAN Bifunctional purine biosynthesis protein PURH OS=Homo sapiens OX=9606 GN=ATIC PE=1 SV=3	NGNYC#VLQMDQSYKPDENEVR|NGNYC#VLQMDQSYKPDENEVR	7|5	0.08|0.27	0.175	0.13435	12	2	14.8936
P31939	146	ATIC	PUR9_HUMAN Bifunctional purine biosynthesis protein PURH OS=Homo sapiens OX=9606 GN=ATIC PE=1 SV=3	VTVVC#EPEDYVVVSTEMQSSESK|	2|	0.165|	0.165	NA	2	1	14.1631
P31939	434	ATIC	PUR9_HUMAN Bifunctional purine biosynthesis protein PURH OS=Homo sapiens OX=9606 GN=ATIC PE=1 SV=3	YTQSNSVC#YAK|YTQSNSVC#YAK	1|2	0.17|0.095	0.1325	0.05303	3	2	11.6998
P31939	325	ATIC	PUR9_HUMAN Bifunctional purine biosynthesis protein PURH OS=Homo sapiens OX=9606 GN=ATIC PE=1 SV=3	MSSFGDFVALSDVC#DVPTAK|MSSFGDFVALSDVC#DVPTAK	7|5	0.16|0.07	0.115	0.06364	12	2	10.3139
P31939	575	ATIC	PUR9_HUMAN Bifunctional purine biosynthesis protein PURH OS=Homo sapiens OX=9606 GN=ATIC PE=1 SV=3	VVIEAC#DELGIILAHTNLR|VVIEAC#DELGIILAHTNLR	6|5	0.02|0.1	0.06	0.05657	11	2	5.66038
P31939	287	ATIC	PUR9_HUMAN Bifunctional purine biosynthesis protein PURH OS=Homo sapiens OX=9606 GN=ATIC PE=1 SV=3	VC#MVYDLYK|VC#MVYDLYK	10|7	0.025|0.02	0.0225	0.00354	17	2	2.20049
P31939	101	ATIC	PUR9_HUMAN Bifunctional purine biosynthesis protein PURH OS=Homo sapiens OX=9606 GN=ATIC PE=1 SV=3	VVAC#NLYPFVK|VVAC#NLYPFVK	5|6	0.00616|0.00813	0.00715	0.00139	11	2	0.709924
Q8WXF7	375	ATL1	ATLA1_HUMAN Atlastin-1 OS=Homo sapiens OX=9606 GN=ATL1 PE=1 SV=1	|MEEIC#GGDKPFLAPNDLQTK	|1	|3.63	3.63	NA	1	1	78.4017		SUBCELLULAR LOCATION: Endoplasmic reticulum membrane {ECO:0000269|PubMed:14506257, ECO:0000269|PubMed:16339213, ECO:0000269|PubMed:17321752, ECO:0000269|PubMed:19665976, ECO:0000269|PubMed:27619977}; Multi-pass membrane protein {ECO:0000269|PubMed:14506257, ECO:0000269|PubMed:16339213, ECO:0000269|PubMed:17321752, ECO:0000269|PubMed:19665976}. Golgi apparatus membrane {ECO:0000269|PubMed:14506257…
Q8NHH9	402	ATL2	ATLA2_HUMAN Atlastin-2 OS=Homo sapiens OX=9606 GN=ATL2 PE=1 SV=2	SMEQVC#GGDKPYIAPSDLER|SMEQVC#GGDKPYIAPSDLER	4|3	0.55|0.2	0.375	0.24749	7	2	27.2727		SUBCELLULAR LOCATION: Endoplasmic reticulum membrane {ECO:0000269|PubMed:18270207, ECO:0000269|PubMed:27619977}; Multi-pass membrane protein {ECO:0000269|PubMed:18270207}. Note=Localizes at endoplasmic reticulum (ER) three-way tubular junctions (PubMed:27619977). {ECO:0000269|PubMed:27619977}.
O00244	41	ATOX1	ATOX1_HUMAN Copper transport protein ATOX1 OS=Homo sapiens OX=9606 GN=ATOX1 PE=1 SV=1	VC#IESEHSMDTLLATLK VC#IESEHSMDTLLATLKK|VC#IESEHSMDTLLATLK VC#IESEHSMDTLLATLKK	8|7	0.09|0.15	0.12	0.04243	15	2	10.7143
Q8NB49	600	ATP11C	AT11C_HUMAN Phospholipid-transporting ATPase IG OS=Homo sapiens OX=9606 GN=ATP11C PE=1 SV=3	TLC#VAFK|TLC#VAFK	1|1	0.00098|0.00098	0.00098	0	2	2	0		SUBCELLULAR LOCATION: Cell membrane {ECO:0000269|PubMed:21914794}; Multi-pass membrane protein {ECO:0000269|PubMed:21914794}. Endoplasmic reticulum membrane {ECO:0000269|PubMed:21914794}. Note=Efficient exit from the endoplasmic reticulum requires the presence of TMEM30A. Some cell membrane localization observed in the presence of TMEM30B.
Q9HD20	755	ATP13A1	AT131_HUMAN Manganese-transporting ATPase 13A1 OS=Homo sapiens OX=9606 GN=ATP13A1 PE=1 SV=2	VVMITGDNPLTAC#HVAQELHFIEK|VVMITGDNPLTAC#HVAQELHFIEK	3|3	0.16|0.28	0.22	0.08485	6	2	18.0328		SUBCELLULAR LOCATION: Endoplasmic reticulum membrane {ECO:0000269|PubMed:24392018}; Multi-pass membrane protein {ECO:0000269|PubMed:24392018}.
Q9HD20	574	ATP13A1	AT131_HUMAN Manganese-transporting ATPase 13A1 OS=Homo sapiens OX=9606 GN=ATP13A1 PE=1 SV=2	ALASC#HSLMQLDDGTLVGDPLEK|ALASC#HSLMQLDDGTLVGDPLEK	1|1	0.00098|0.34	0.17049	0.23972	2	2	14.5657		SUBCELLULAR LOCATION: Endoplasmic reticulum membrane {ECO:0000269|PubMed:24392018}; Multi-pass membrane protein {ECO:0000269|PubMed:24392018}.
Q9H7F0	920	ATP13A3	AT133_HUMAN Probable cation-transporting ATPase 13A3 OS=Homo sapiens OX=9606 GN=ATP13A3 PE=1 SV=4	|TPSISC#VPNLIR	|1	|0.00098	0.00098	NA	1	1	0		SUBCELLULAR LOCATION: Membrane {ECO:0000250}; Multi-pass membrane protein {ECO:0000250}.
P05023	249	ATP1A1	AT1A1_HUMAN Sodium/potassium-transporting ATPase subunit alpha-1 OS=Homo sapiens OX=9606 GN=ATP1A1 PE=1 SV=1	NIAFFSTNC#VEGTAR|NIAFFSTNC#VEGTAR	1|2	0.07|1.01	0.54	0.66468	3	2	35.0649		SUBCELLULAR LOCATION: Cell membrane, sarcolemma {ECO:0000269|PubMed:7711835}; Multi-pass membrane protein {ECO:0000255}. Melanosome {ECO:0000269|PubMed:17081065}. Note=Identified by mass spectrometry in melanosome fractions from stage I to stage IV. {ECO:0000269|PubMed:17081065}.
P05023	663	ATP1A1	AT1A1_HUMAN Sodium/potassium-transporting ATPase subunit alpha-1 OS=Homo sapiens OX=9606 GN=ATP1A1 PE=1 SV=1	AC#VVHGSDLK|AC#VVHGSDLK	3|2	0.04|0.085	0.0625	0.03182	5	2	5.88235		SUBCELLULAR LOCATION: Cell membrane, sarcolemma {ECO:0000269|PubMed:7711835}; Multi-pass membrane protein {ECO:0000255}. Melanosome {ECO:0000269|PubMed:17081065}. Note=Identified by mass spectrometry in melanosome fractions from stage I to stage IV. {ECO:0000269|PubMed:17081065}.
P05023	211	ATP1A1	AT1A1_HUMAN Sodium/potassium-transporting ATPase subunit alpha-1 OS=Homo sapiens OX=9606 GN=ATP1A1 PE=1 SV=1	IISANGC#K|IISANGC#K	1|1	0.06|0.04	0.05	0.01414	2	2	4.7619		SUBCELLULAR LOCATION: Cell membrane, sarcolemma {ECO:0000269|PubMed:7711835}; Multi-pass membrane protein {ECO:0000255}. Melanosome {ECO:0000269|PubMed:17081065}. Note=Identified by mass spectrometry in melanosome fractions from stage I to stage IV. {ECO:0000269|PubMed:17081065}.
P05023	374	ATP1A1	AT1A1_HUMAN Sodium/potassium-transporting ATPase subunit alpha-1 OS=Homo sapiens OX=9606 GN=ATP1A1 PE=1 SV=1	NLEAVETLGSTSTIC#SDK|NLEAVETLGSTSTIC#SDK	1|1	0.00098|0.06	0.03049	0.04173	2	2	2.95879		SUBCELLULAR LOCATION: Cell membrane, sarcolemma {ECO:0000269|PubMed:7711835}; Multi-pass membrane protein {ECO:0000255}. Melanosome {ECO:0000269|PubMed:17081065}. Note=Identified by mass spectrometry in melanosome fractions from stage I to stage IV. {ECO:0000269|PubMed:17081065}.
P05023	428	ATP1A1	AT1A1_HUMAN Sodium/potassium-transporting ATPase subunit alpha-1 OS=Homo sapiens OX=9606 GN=ATP1A1 PE=1 SV=1	IAGLC#NR|IAGLC#NR	1|1	0.03|0.00098	0.01549	0.02052	2	2	1.52537		SUBCELLULAR LOCATION: Cell membrane, sarcolemma {ECO:0000269|PubMed:7711835}; Multi-pass membrane protein {ECO:0000255}. Melanosome {ECO:0000269|PubMed:17081065}. Note=Identified by mass spectrometry in melanosome fractions from stage I to stage IV. {ECO:0000269|PubMed:17081065}.
P05023	705	ATP1A1	AT1A1_HUMAN Sodium/potassium-transporting ATPase subunit alpha-1 OS=Homo sapiens OX=9606 GN=ATP1A1 PE=1 SV=1	LIIVEGC#QR|LIIVEGC#QR	6|5	0.01284|0.00791	0.01038	0.00349	11	2	1.02734		SUBCELLULAR LOCATION: Cell membrane, sarcolemma {ECO:0000269|PubMed:7711835}; Multi-pass membrane protein {ECO:0000255}. Melanosome {ECO:0000269|PubMed:17081065}. Note=Identified by mass spectrometry in melanosome fractions from stage I to stage IV. {ECO:0000269|PubMed:17081065}.
P05026	213	ATP1B1	AT1B1_HUMAN Sodium/potassium-transporting ATPase subunit beta-1 OS=Homo sapiens OX=9606 GN=ATP1B1 PE=1 SV=1	YNPNVLPVQC#TGK|YNPNVLPVQC#TGK	3|2	0.00098|0.00098	0.00098	0	5	2	0	Disulfide bond	SUBCELLULAR LOCATION: Cell membrane {ECO:0000255}; Single-pass type II membrane protein {ECO:0000255}. Cell membrane, sarcolemma {ECO:0000250|UniProtKB:P14094}. Note=Colocalizes with OBSCN at the intercalated disk and sarcolemma in cardiomyocytes. Localizes in long striations at the level of Z and M lines. {ECO:0000250|UniProtKB:P14094}.	Ontology_term=ECO:0000250;evidence=ECO:0000250
P05026	175	ATP1B1	AT1B1_HUMAN Sodium/potassium-transporting ATPase subunit beta-1 OS=Homo sapiens OX=9606 GN=ATP1B1 PE=1 SV=1	|EGKPC#IIIK	|1	|0.00098	0.00098	NA	1	1	0	Disulfide bond	SUBCELLULAR LOCATION: Cell membrane {ECO:0000255}; Single-pass type II membrane protein {ECO:0000255}. Cell membrane, sarcolemma {ECO:0000250|UniProtKB:P14094}. Note=Colocalizes with OBSCN at the intercalated disk and sarcolemma in cardiomyocytes. Localizes in long striations at the level of Z and M lines. {ECO:0000250|UniProtKB:P14094}.	Ontology_term=ECO:0000250;evidence=ECO:0000250
P16615	875	ATP2A2	AT2A2_HUMAN Sarcoplasmic/endoplasmic reticulum calcium ATPase 2 OS=Homo sapiens OX=9606 GN=ATP2A2 PE=1 SV=1	VSFYQLSHFLQC#K|VSFYQLSHFLQC#K	3|4	1.58|0.63049	1.10525	0.6714	7	2	52.4997	Disulfide bond	SUBCELLULAR LOCATION: Endoplasmic reticulum membrane {ECO:0000250|UniProtKB:O55143}; Multi-pass membrane protein {ECO:0000255}. Sarcoplasmic reticulum membrane {ECO:0000250|UniProtKB:O55143}; Multi-pass membrane protein {ECO:0000255}.	Ontology_term=ECO:0000250;evidence=ECO:0000250|UniProtKB:P11607
P16615	447	ATP2A2	AT2A2_HUMAN Sarcoplasmic/endoplasmic reticulum calcium ATPase 2 OS=Homo sapiens OX=9606 GN=ATP2A2 PE=1 SV=1	VGEATETALTC#LVEK|VGEATETALTC#LVEK	4|2	0.47|0.315	0.3925	0.1096	6	2	28.1867		SUBCELLULAR LOCATION: Endoplasmic reticulum membrane {ECO:0000250|UniProtKB:O55143}; Multi-pass membrane protein {ECO:0000255}. Sarcoplasmic reticulum membrane {ECO:0000250|UniProtKB:O55143}; Multi-pass membrane protein {ECO:0000255}.
P16615	377	ATP2A2	AT2A2_HUMAN Sarcoplasmic/endoplasmic reticulum calcium ATPase 2 OS=Homo sapiens OX=9606 GN=ATP2A2 PE=1 SV=1	VEGDTC#SLNEFTITGSTYAPIGEVHK|VEGDTC#SLNEFTITGSTYAPIGEVHK	2|1	0.08549|0.3	0.19274	0.15168	3	2	16.1594		SUBCELLULAR LOCATION: Endoplasmic reticulum membrane {ECO:0000250|UniProtKB:O55143}; Multi-pass membrane protein {ECO:0000255}. Sarcoplasmic reticulum membrane {ECO:0000250|UniProtKB:O55143}; Multi-pass membrane protein {ECO:0000255}.
P16615	595	ATP2A2	AT2A2_HUMAN Sarcoplasmic/endoplasmic reticulum calcium ATPase 2 OS=Homo sapiens OX=9606 GN=ATP2A2 PE=1 SV=1	YETNLTFVGC#VGMLDPPR|	1|	0.17|	0.17	NA	1	1	14.5299		SUBCELLULAR LOCATION: Endoplasmic reticulum membrane {ECO:0000250|UniProtKB:O55143}; Multi-pass membrane protein {ECO:0000255}. Sarcoplasmic reticulum membrane {ECO:0000250|UniProtKB:O55143}; Multi-pass membrane protein {ECO:0000255}.
P16615	635	ATP2A2	AT2A2_HUMAN Sarcoplasmic/endoplasmic reticulum calcium ATPase 2 OS=Homo sapiens OX=9606 GN=ATP2A2 PE=1 SV=1	GTAVAIC#R|GTAVAIC#R	1|1	0.07|0.16	0.115	0.06364	2	2	10.3139		SUBCELLULAR LOCATION: Endoplasmic reticulum membrane {ECO:0000250|UniProtKB:O55143}; Multi-pass membrane protein {ECO:0000255}. Sarcoplasmic reticulum membrane {ECO:0000250|UniProtKB:O55143}; Multi-pass membrane protein {ECO:0000255}.
P16615	498	ATP2A2	AT2A2_HUMAN Sarcoplasmic/endoplasmic reticulum calcium ATPase 2 OS=Homo sapiens OX=9606 GN=ATP2A2 PE=1 SV=1	SMSVYC#TPNKPSR|SMSVYC#TPNKPSR	6|6	0.025|0.05	0.0375	0.01768	12	2	3.61446		SUBCELLULAR LOCATION: Endoplasmic reticulum membrane {ECO:0000250|UniProtKB:O55143}; Multi-pass membrane protein {ECO:0000255}. Sarcoplasmic reticulum membrane {ECO:0000250|UniProtKB:O55143}; Multi-pass membrane protein {ECO:0000255}.
P16615	364	ATP2A2	AT2A2_HUMAN Sarcoplasmic/endoplasmic reticulum calcium ATPase 2 OS=Homo sapiens OX=9606 GN=ATP2A2 PE=1 SV=1	TGTLTTNQMSVC#R|TGTLTTNQMSVC#R	4|3	0.015|0.04	0.0275	0.01768	7	2	2.6764		SUBCELLULAR LOCATION: Endoplasmic reticulum membrane {ECO:0000250|UniProtKB:O55143}; Multi-pass membrane protein {ECO:0000255}. Sarcoplasmic reticulum membrane {ECO:0000250|UniProtKB:O55143}; Multi-pass membrane protein {ECO:0000255}.
P16615	997	ATP2A2	AT2A2_HUMAN Sarcoplasmic/endoplasmic reticulum calcium ATPase 2 OS=Homo sapiens OX=9606 GN=ATP2A2 PE=1 SV=1	NYLEPGKEC#VQPATK|NYLEPGKEC#VQPATK	5|2	0.02|0.02049	0.02024	0.00035	7	2	1.98385		SUBCELLULAR LOCATION: Endoplasmic reticulum membrane {ECO:0000250|UniProtKB:O55143}; Multi-pass membrane protein {ECO:0000255}. Sarcoplasmic reticulum membrane {ECO:0000250|UniProtKB:O55143}; Multi-pass membrane protein {ECO:0000255}.
P16615	471	ATP2A2	AT2A2_HUMAN Sarcoplasmic/endoplasmic reticulum calcium ATPase 2 OS=Homo sapiens OX=9606 GN=ATP2A2 PE=1 SV=1	ANAC#NSVIK|ANAC#NSVIK	2|1	0.00098|0.03	0.01549	0.02052	3	2	1.52537		SUBCELLULAR LOCATION: Endoplasmic reticulum membrane {ECO:0000250|UniProtKB:O55143}; Multi-pass membrane protein {ECO:0000255}. Sarcoplasmic reticulum membrane {ECO:0000250|UniProtKB:O55143}; Multi-pass membrane protein {ECO:0000255}.
P16615	560	ATP2A2	AT2A2_HUMAN Sarcoplasmic/endoplasmic reticulum calcium ATPase 2 OS=Homo sapiens OX=9606 GN=ATP2A2 PE=1 SV=1	C#LALATHDNPLR|C#LALATHDNPLR	9|9	0.02|0.01	0.015	0.00707	18	2	1.47783		SUBCELLULAR LOCATION: Endoplasmic reticulum membrane {ECO:0000250|UniProtKB:O55143}; Multi-pass membrane protein {ECO:0000255}. Sarcoplasmic reticulum membrane {ECO:0000250|UniProtKB:O55143}; Multi-pass membrane protein {ECO:0000255}.
P20020	60	ATP2B1	AT2B1_HUMAN Plasma membrane calcium-transporting ATPase 1 OS=Homo sapiens OX=9606 GN=ATP2B1 PE=1 SV=4	IQESYGDVYGIC#TK|IQESYGDVYGIC#TK	1|2	0.06|0.215	0.1375	0.1096	3	2	12.0879		SUBCELLULAR LOCATION: Cell membrane {ECO:0000269|PubMed:18029012}; Multi-pass membrane protein {ECO:0000255}. Basolateral cell membrane {ECO:0000250|UniProtKB:G5E829}. Cell junction, synapse {ECO:0000250|UniProtKB:G5E829}. Note=Colocalizes with SV2A in photoreceptor synaptic terminals. Colocalizes with NPTN to the immunological synapse. Colocalizes with EPB41 to the basolateral membrane in entero…
P20020	649	ATP2B1	AT2B1_HUMAN Plasma membrane calcium-transporting ATPase 1 OS=Homo sapiens OX=9606 GN=ATP2B1 PE=1 SV=4	TIC#LAFR|TIC#LAFR	1|3	0.04|0.03	0.035	0.00707	4	2	3.38164		SUBCELLULAR LOCATION: Cell membrane {ECO:0000269|PubMed:18029012}; Multi-pass membrane protein {ECO:0000255}. Basolateral cell membrane {ECO:0000250|UniProtKB:G5E829}. Cell junction, synapse {ECO:0000250|UniProtKB:G5E829}. Note=Colocalizes with SV2A in photoreceptor synaptic terminals. Colocalizes with NPTN to the immunological synapse. Colocalizes with EPB41 to the basolateral membrane in entero…
P98194	477	ATP2C1	AT2C1_HUMAN Calcium-transporting ATPase type 2C member 1 OS=Homo sapiens OX=9606 GN=ATP2C1 PE=1 SV=3	TQQDRPEIC#FMK|TQQDRPEIC#FMK	1|3	0.11|0.07	0.09	0.02828	4	2	8.25688		SUBCELLULAR LOCATION: Golgi apparatus membrane {ECO:0000269|PubMed:12707275}; Multi-pass membrane protein {ECO:0000269|PubMed:12707275}.
P36542	103	ATP5F1C	ATPG_HUMAN ATP synthase subunit gamma, mitochondrial OS=Homo sapiens OX=9606 GN=ATP5F1C PE=1 SV=1	GLC#GAIHSSIAK|GLC#GAIHSSIAK	3|4	0.06|0.04	0.05	0.01414	7	2	4.7619		SUBCELLULAR LOCATION: Mitochondrion inner membrane {ECO:0000250|UniProtKB:P05631}; Peripheral membrane protein {ECO:0000250|UniProtKB:P05631}; Matrix side {ECO:0000250|UniProtKB:P05631}.
P56381	19	ATP5F1E	ATP5E_HUMAN ATP synthase subunit epsilon, mitochondrial OS=Homo sapiens OX=9606 GN=ATP5F1E PE=1 SV=2	YSQIC#AK|YSQIC#AK	1|2	0.14|0.035	0.0875	0.07425	3	2	8.04598		SUBCELLULAR LOCATION: Mitochondrion. Mitochondrion inner membrane.
O75947	101	ATP5PD	ATP5H_HUMAN ATP synthase subunit d, mitochondrial OS=Homo sapiens OX=9606 GN=ATP5PD PE=1 SV=3	SC#AEWVSLSK|SC#AEWVSLSK	3|2	0.2|0.86	0.53	0.46669	5	2	34.6405		SUBCELLULAR LOCATION: Mitochondrion. Mitochondrion inner membrane.
Q93050	310	ATP6V0A1	VPP1_HUMAN V-type proton ATPase 116 kDa subunit a isoform 1 OS=Homo sapiens OX=9606 GN=ATP6V0A1 PE=1 SV=3	AIYHTLNLC#NIDVTQK|AIYHTLNLC#NIDVTQK	2|2	0.18049|0.44549	0.31299	0.18738	4	2	23.838		SUBCELLULAR LOCATION: Cytoplasmic vesicle membrane; Multi-pass membrane protein. Melanosome. Note=Coated vesicle. Identified by mass spectrometry in melanosome fractions from stage I to stage IV.
P61421	335	ATP6V0D1	VA0D1_HUMAN V-type proton ATPase subunit d 1 OS=Homo sapiens OX=9606 GN=ATP6V0D1 PE=1 SV=1	|NIVWIAEC#IAQR	|1	|0.21	0.21	NA	1	1	17.3554		SUBCELLULAR LOCATION: Membrane {ECO:0000305|PubMed:21844891}; Peripheral membrane protein {ECO:0000305|PubMed:21844891}; Cytoplasmic side {ECO:0000305|PubMed:21844891}. Note=Localizes to centrosome and the base of the cilium.
P38606	138	ATP6V1A	VATA_HUMAN V-type proton ATPase catalytic subunit A OS=Homo sapiens OX=9606 GN=ATP6V1A PE=1 SV=2	WDFTPC#K|	1|	6.89|	6.89	NA	1	1	87.3257		SUBCELLULAR LOCATION: Cytoplasm {ECO:0000269|PubMed:29668857}.
P38606	277	ATP6V1A	VATA_HUMAN V-type proton ATPase catalytic subunit A OS=Homo sapiens OX=9606 GN=ATP6V1A PE=1 SV=2	YSNSDVIIYVGC#GER|YSNSDVIIYVGC#GER	2|2	0.3|0.485	0.3925	0.13081	4	2	28.1867		SUBCELLULAR LOCATION: Cytoplasm {ECO:0000269|PubMed:29668857}.
P38606	532	ATP6V1A	VATA_HUMAN V-type proton ATPase catalytic subunit A OS=Homo sapiens OX=9606 GN=ATP6V1A PE=1 SV=2	FC#PFYK|FC#PFYK	2|3	0.11603|0.07	0.09302	0.03255	5	2	8.51037		SUBCELLULAR LOCATION: Cytoplasm {ECO:0000269|PubMed:29668857}.
P21281	112	ATP6V1B2	VATB2_HUMAN V-type proton ATPase subunit B, brain isoform OS=Homo sapiens OX=9606 GN=ATP6V1B2 PE=1 SV=3	KTSC#EFTGDILR|KTSC#EFTGDILR TSC#EFTGDILR	2|4	1.5|3.78	2.64	1.6122	6	2	72.5275		SUBCELLULAR LOCATION: Endomembrane system; Peripheral membrane protein. Melanosome. Note=Endomembrane. Identified by mass spectrometry in melanosome fractions from stage I to stage IV.
P21281	207	ATP6V1B2	VATB2_HUMAN V-type proton ATPase subunit B, brain isoform OS=Homo sapiens OX=9606 GN=ATP6V1B2 PE=1 SV=3	IPIFSAAGLPHNEIAAQIC#R|IPIFSAAGLPHNEIAAQIC#R	5|5	0.25|0.5	0.375	0.17678	10	2	27.2727		SUBCELLULAR LOCATION: Endomembrane system; Peripheral membrane protein. Melanosome. Note=Endomembrane. Identified by mass spectrometry in melanosome fractions from stage I to stage IV.
P21281	425	ATP6V1B2	VATB2_HUMAN V-type proton ATPase subunit B, brain isoform OS=Homo sapiens OX=9606 GN=ATP6V1B2 PE=1 SV=3	KDHADVSNQLYAC#YAIGK|KDHADVSNQLYAC#YAIGK	2|2	0.00098|0.20549	0.10324	0.14461	4	2	9.35789		SUBCELLULAR LOCATION: Endomembrane system; Peripheral membrane protein. Melanosome. Note=Endomembrane. Identified by mass spectrometry in melanosome fractions from stage I to stage IV.
Q9UI12	85	ATP6V1H	VATH_HUMAN V-type proton ATPase subunit H OS=Homo sapiens OX=9606 GN=ATP6V1H PE=1 SV=1	TFINLMTHIC#K|	1|	0.00098|	0.00098	NA	1	1	0
O43861	551	ATP9B	ATP9B_HUMAN Probable phospholipid-transporting ATPase IIB OS=Homo sapiens OX=9606 GN=ATP9B PE=2 SV=4	AIVLC#HNVTPVYESR|AIVLC#HNVTPVYESR	1|1	0.00098|0.00098	0.00098	0	2	2	0		SUBCELLULAR LOCATION: Golgi apparatus, trans-Golgi network membrane {ECO:0000269|PubMed:21914794}; Multi-pass membrane protein {ECO:0000269|PubMed:21914794}. Note=Efficient exit from the endoplasmic reticulum does not require TMEM30A, nor TMEM30B.
O75882	657	ATRN	ATRN_HUMAN Attractin OS=Homo sapiens OX=9606 GN=ATRN PE=1 SV=2	SEAAC#LAAGPGIR|SEAAC#LAAGPGIR	1|1	3.66|2.95	3.305	0.50205	2	2	76.7712		SUBCELLULAR LOCATION: [Isoform 1]: Cell membrane {ECO:0000269|PubMed:7539799}; Single-pass type I membrane protein {ECO:0000269|PubMed:7539799}.; SUBCELLULAR LOCATION: [Isoform 2]: Secreted {ECO:0000269|PubMed:7539799, ECO:0000269|PubMed:9736737}.; SUBCELLULAR LOCATION: [Isoform 3]: Secreted {ECO:0000269|PubMed:7539799}.
O75882	1361	ATRN	ATRN_HUMAN Attractin OS=Homo sapiens OX=9606 GN=ATRN PE=1 SV=2	TVPKPIALEPC#FGNK|TVPKPIALEPC#FGNK	1|1	0.00098|0.00098	0.00098	0	2	2	0		SUBCELLULAR LOCATION: [Isoform 1]: Cell membrane {ECO:0000269|PubMed:7539799}; Single-pass type I membrane protein {ECO:0000269|PubMed:7539799}.; SUBCELLULAR LOCATION: [Isoform 2]: Secreted {ECO:0000269|PubMed:7539799, ECO:0000269|PubMed:9736737}.; SUBCELLULAR LOCATION: [Isoform 3]: Secreted {ECO:0000269|PubMed:7539799}.
P46100	1718	ATRX	ATRX_HUMAN Transcriptional regulator ATRX OS=Homo sapiens OX=9606 GN=ATRX PE=1 SV=5	|ALVDPGPDFVVC#DEGHILK	|1	|1.4	1.4	NA	1	1	58.3333		SUBCELLULAR LOCATION: Nucleus. Chromosome, telomere. Nucleus, PML body. Note=Associated with pericentromeric heterochromatin during interphase and mitosis, probably by interacting with CBX5/HP1 alpha. Colocalizes with histone H3.3, DAXX, HIRA and ASF1A at PML-nuclear bodies. Colocalizes with cohesin (SMC1 and SMC3) and MECP2 at the maternal H19 ICR (By similarity). {ECO:0000250}.
P46100	681	ATRX	ATRX_HUMAN Transcriptional regulator ATRX OS=Homo sapiens OX=9606 GN=ATRX PE=1 SV=5	RPTETNPVTSNSDEEC#NETVK|	1|	0.00098|	0.00098	NA	1	1	0		SUBCELLULAR LOCATION: Nucleus. Chromosome, telomere. Nucleus, PML body. Note=Associated with pericentromeric heterochromatin during interphase and mitosis, probably by interacting with CBX5/HP1 alpha. Colocalizes with histone H3.3, DAXX, HIRA and ASF1A at PML-nuclear bodies. Colocalizes with cohesin (SMC1 and SMC3) and MECP2 at the maternal H19 ICR (By similarity). {ECO:0000250}.
P46100	197	ATRX	ATRX_HUMAN Transcriptional regulator ATRX OS=Homo sapiens OX=9606 GN=ATRX PE=1 SV=5	HPSLQVLIC#K|HPSLQVLIC#K	3|1	0.00098|0.00098	0.00098	0	4	2	0		SUBCELLULAR LOCATION: Nucleus. Chromosome, telomere. Nucleus, PML body. Note=Associated with pericentromeric heterochromatin during interphase and mitosis, probably by interacting with CBX5/HP1 alpha. Colocalizes with histone H3.3, DAXX, HIRA and ASF1A at PML-nuclear bodies. Colocalizes with cohesin (SMC1 and SMC3) and MECP2 at the maternal H19 ICR (By similarity). {ECO:0000250}.
Q9UBB4	382	ATXN10	ATX10_HUMAN Ataxin-10 OS=Homo sapiens OX=9606 GN=ATXN10 PE=1 SV=1	LIGNLC#YK|LIGNLC#YK	1|1	0.04|1.24	0.64	0.84853	2	2	39.0244		SUBCELLULAR LOCATION: Cytoplasm, perinuclear region {ECO:0000269|PubMed:16498633}.
Q9UBB4	283	ATXN10	ATX10_HUMAN Ataxin-10 OS=Homo sapiens OX=9606 GN=ATXN10 PE=1 SV=1	HAELIASTFVDQC#K|HAELIASTFVDQC#K	3|2	0.00098|0.75549	0.37823	0.53352	5	2	27.4432		SUBCELLULAR LOCATION: Cytoplasm, perinuclear region {ECO:0000269|PubMed:16498633}.
Q99700	332	ATXN2	ATX2_HUMAN Ataxin-2 OS=Homo sapiens OX=9606 GN=ATXN2 PE=1 SV=2	C#SDFVVVQFK|C#SDFVVVQFK	1|1	3.68|7.86	5.77	2.95571	2	2	85.229		SUBCELLULAR LOCATION: Cytoplasm {ECO:0000250}.
Q99700	301	ATXN2	ATX2_HUMAN Ataxin-2 OS=Homo sapiens OX=9606 GN=ATXN2 PE=1 SV=2	C#DLVLDAAHEK|C#DLVLDAAHEK	3|3	0.09|0.22	0.155	0.09192	6	2	13.4199		SUBCELLULAR LOCATION: Cytoplasm {ECO:0000250}.
Q99700	892	ATXN2	ATX2_HUMAN Ataxin-2 OS=Homo sapiens OX=9606 GN=ATXN2 PE=1 SV=2	RGPEVTSQGVQTSSPAC#K|RGPEVTSQGVQTSSPAC#K	4|3	0.115|0.04	0.0775	0.05303	7	2	7.19258		SUBCELLULAR LOCATION: Cytoplasm {ECO:0000250}.
Q8WWM7	135	ATXN2L	ATX2L_HUMAN Ataxin-2-like protein OS=Homo sapiens OX=9606 GN=ATXN2L PE=1 SV=2	MLHFLTAVVGSTC#DVK|	1|	1.21|	1.21	NA	1	1	54.7511		SUBCELLULAR LOCATION: Membrane {ECO:0000269|PubMed:11784712}; Peripheral membrane protein {ECO:0000269|PubMed:11784712}. Cytoplasm {ECO:0000269|PubMed:23209657}. Nucleus speckle {ECO:0000269|PubMed:23209657}. Cytoplasmic granule {ECO:0000269|PubMed:23209657}. Note=Predominantly cytoplasmic but is also detected in nuclear speckles (PubMed:23209657). Component of cytoplasmic stress granules (PubMed…
P54252	316	ATXN3	ATX3_HUMAN Ataxin-3 OS=Homo sapiens OX=9606 GN=ATXN3 PE=1 SV=5	QQQQQQQQQQGDLSGQSSHPC#ER|	1|	0.04|	0.04	NA	1	1	3.84615		SUBCELLULAR LOCATION: Nucleus matrix {ECO:0000269|PubMed:9580663}. Nucleus {ECO:0000269|PubMed:30455355}. Note=Predominantly nuclear, but not exclusively, inner nuclear matrix.
O14965	247	AURKA	AURKA_HUMAN Aurora kinase A OS=Homo sapiens OX=9606 GN=AURKA PE=1 SV=2	TATYITELANALSYC#HSK|TATYITELANALSYC#HSK	1|1	3.56|2.53	3.045	0.72832	2	2	75.2781		SUBCELLULAR LOCATION: Cytoplasm, cytoskeleton, microtubule organizing center, centrosome {ECO:0000269|PubMed:12576638, ECO:0000269|PubMed:13678582, ECO:0000269|PubMed:17229885, ECO:0000269|PubMed:17726514, ECO:0000269|PubMed:19357306, ECO:0000269|PubMed:21225229, ECO:0000269|PubMed:22014574, ECO:0000269|PubMed:23213400, ECO:0000269|PubMed:25657325, ECO:0000269|PubMed:9153231}. Cytoplasm, cytoskel…
Q9NQS1	251	AVEN	AVEN_HUMAN Cell death regulator Aven OS=Homo sapiens OX=9606 GN=AVEN PE=1 SV=1	SVAAGC#PVLLGK|SVAAGC#PVLLGK	2|1	0.155|0.00098	0.07799	0.10891	3	2	7.23476		SUBCELLULAR LOCATION: Endomembrane system; Peripheral membrane protein. Note=Associated with intracellular membranes.
Q9NQS1	193	AVEN	AVEN_HUMAN Cell death regulator Aven OS=Homo sapiens OX=9606 GN=AVEN PE=1 SV=1	ALQELPLC#LR|ALQELPLC#LR	1|3	0.03|0.00098	0.01549	0.02052	4	2	1.52537		SUBCELLULAR LOCATION: Endomembrane system; Peripheral membrane protein. Note=Associated with intracellular membranes.
Q9H6S1	296	AZI2	AZI2_HUMAN 5-azacytidine-induced protein 2 OS=Homo sapiens OX=9606 GN=AZI2 PE=1 SV=1	|ALC#HTTSSPLPGDVK	|1	|0.00098	0.00098	NA	1	1	0		SUBCELLULAR LOCATION: Cytoplasm {ECO:0000269|PubMed:14560022}.
P61769	45	B2M	B2MG_HUMAN Beta-2-microglobulin OS=Homo sapiens OX=9606 GN=B2M PE=1 SV=1	SNFLNC#YVSGFHPSDIEVDLLK|SNFLNC#YVSGFHPSDIEVDLLK	1|2	0.16|0.345	0.2525	0.13081	3	2	20.1597	Disulfide bond	SUBCELLULAR LOCATION: Secreted {ECO:0000269|PubMed:1336137, ECO:0000269|PubMed:7554280}. Cell surface {ECO:0000269|PubMed:25356553}. Note=Detected in serum and urine (PubMed:1336137, PubMed:7554280). {ECO:0000269|PubMed:7554280, ECO:0000269|Ref.6}.; SUBCELLULAR LOCATION: Note=(Microbial infection) In the presence of M.tuberculosis EsxA-EsxB complex decreased amounts of B2M are found on the cell s…	Ontology_term=ECO:0000255,ECO:0000269,ECO:0000269,ECO:0000269,ECO:0000269,ECO:0000269,ECO:0000269,ECO:0000269,ECO:0000269;evidence=ECO:0000255|PROSITE-ProRule:PRU00114,ECO:0000269|PubMed:12119416,ECO:0000269|PubMed:12796775,ECO:0000269|PubMed:16491088,ECO:0000269|PubMed:16901902,ECO:0000269|PubMed:17646174,ECO:0000269|PubMed:18395224,ECO:0000269|PubMed:18835253,ECO:0000269|PubMed:19284997;Dbxref=…
O60513	77	B4GALT4	B4GT4_HUMAN Beta-1,4-galactosyltransferase 4 OS=Homo sapiens OX=9606 GN=B4GALT4 PE=1 SV=1	KVELDNC#PSVSPYLR|KVELDNC#PSVSPYLR	1|1	0.06|0.00098	0.03049	0.04173	2	2	2.95879	Disulfide bond	SUBCELLULAR LOCATION: Golgi apparatus, Golgi stack membrane; Single-pass type II membrane protein. Note=Trans cisternae of Golgi stack.	Ontology_term=ECO:0000250;evidence=ECO:0000250
O43505	159	B4GAT1	B4GA1_HUMAN Beta-1,4-glucuronyltransferase 1 OS=Homo sapiens OX=9606 GN=B4GAT1 PE=1 SV=1	VAMHLVC#PSR|	1|	0.35|	0.35	NA	1	1	25.9259		SUBCELLULAR LOCATION: Golgi apparatus membrane {ECO:0000269|PubMed:19587235, ECO:0000269|PubMed:23359570, ECO:0000269|PubMed:25279699}; Single-pass type II membrane protein {ECO:0000269|PubMed:23359570}. Note=Localizes near the trans-Golgi apparatus. {ECO:0000269|PubMed:25279699}.
Q9NWV8	294	BABAM1	BABA1_HUMAN BRISC and BRCA1-A complex member 1 OS=Homo sapiens OX=9606 GN=BABAM1 PE=1 SV=1	YEVALAGPALELHNC#MAK|YEVALAGPALELHNC#MAK	7|4	0.15|0.155	0.1525	0.00354	11	2	13.2321		SUBCELLULAR LOCATION: Cytoplasm {ECO:0000269|PubMed:19261749, ECO:0000269|PubMed:24075985}. Nucleus {ECO:0000269|PubMed:19261746, ECO:0000269|PubMed:19261748, ECO:0000269|PubMed:19261749, ECO:0000269|PubMed:21282113, ECO:0000269|PubMed:24075985}. Note=Localizes at sites of DNA damage at double-strand breaks (DSBs). {ECO:0000269|PubMed:19261746, ECO:0000269|PubMed:19261748, ECO:0000269|PubMed:1926…
O95816	142	BAG2	BAG2_HUMAN BAG family molecular chaperone regulator 2 OS=Homo sapiens OX=9606 GN=BAG2 PE=1 SV=1	SHLMSLYSAC#SSEVPHGPVDQK|SHLMSLYSAC#SSEVPHGPVDQK	3|1	0.38|0.00098	0.19049	0.26801	4	2	16.001
O95816	162	BAG2	BAG2_HUMAN BAG family molecular chaperone regulator 2 OS=Homo sapiens OX=9606 GN=BAG2 PE=1 SV=1	FQSIVIGC#ALEDQKK FQSIVIGC#ALEDQK|FQSIVIGC#ALEDQKK FQSIVIGC#ALEDQK	4|3	0.00098|0.00098	0.00098	0	7	2	0
O95817	151	BAG3	BAG3_HUMAN BAG family molecular chaperone regulator 3 OS=Homo sapiens OX=9606 GN=BAG3 PE=1 SV=3	QC#GQVAAAAAAQPPASHGPER|QC#GQVAAAAAAQPPASHGPER	7|5	0.06|0.24	0.15	0.12728	12	2	13.0435		SUBCELLULAR LOCATION: Nucleus {ECO:0000269|PubMed:26159920}. Cytoplasm {ECO:0000269|PubMed:26159920}. Note=Colocalizes with HSF1 to the nucleus upon heat stress (PubMed:26159920). {ECO:0000269|PubMed:26159920}.
Q9UL15	191	BAG5	BAG5_HUMAN BAG family molecular chaperone regulator 5 OS=Homo sapiens OX=9606 GN=BAG5 PE=1 SV=1	INFVMC#EVNK|	2|	5.42|	5.42	NA	2	1	84.4237
Q9UQB8	195	BAIAP2	BAIP2_HUMAN Brain-specific angiogenesis inhibitor 1-associated protein 2 OS=Homo sapiens OX=9606 GN=BAIAP2 PE=1 SV=1	FC#FLVEK|FC#FLVEK	1|1	0.36|0.03	0.195	0.23335	2	2	16.318		SUBCELLULAR LOCATION: Cytoplasm. Membrane; Peripheral membrane protein. Cell projection, filopodium. Cell projection, ruffle. Cytoplasm, cytoskeleton. Note=Detected throughout the cytoplasm in the absence of specific binding partners. Detected in filopodia and close to membrane ruffles. Recruited to actin pedestals that are formed upon infection by bacteria at bacterial attachment sites.
Q9UHR4	194	BAIAP2L1	BI2L1_HUMAN Brain-specific angiogenesis inhibitor 1-associated protein 2-like protein 1 OS=Homo sapiens OX=9606 GN=BAIAP2L1 PE=1 SV=2	FC#FLVDK|FC#FLVDK	2|1	0.97|0.96	0.965	0.00707	3	2	49.1094		SUBCELLULAR LOCATION: Cytoplasm, cytoskeleton {ECO:0000269|PubMed:19366662}. Note=Recruited to actin pedestals that are formed upon infection by bacteria at bacterial attachment sites.
Q8IXM2	66	BAP18	BAP18_HUMAN Chromatin complexes subunit BAP18 OS=Homo sapiens OX=9606 GN=BAP18 PE=1 SV=1	FGDDLNHISC#VIK|FGDDLNHISC#VIK	3|1	0.82|1.01	0.915	0.13435	4	2	47.7807		SUBCELLULAR LOCATION: Nucleus {ECO:0000305}.
Q9NRL2	105	BAZ1A	BAZ1A_HUMAN Bromodomain adjacent to zinc finger domain protein 1A OS=Homo sapiens OX=9606 GN=BAZ1A PE=1 SV=2	LHEIC#DDIFAYVK|LHEIC#DDIFAYVK	2|2	0.115|0.065	0.09	0.03536	4	2	8.25688		SUBCELLULAR LOCATION: Nucleus. Note=May target the CHRAC complex to heterochromatin.
Q9UIG0	753	BAZ1B	BAZ1B_HUMAN Tyrosine-protein kinase BAZ1B OS=Homo sapiens OX=9606 GN=BAZ1B PE=1 SV=2	LQILTALC#HR|LQILTALC#HR	4|3	0.74|0.33	0.535	0.28991	7	2	34.8534		SUBCELLULAR LOCATION: Nucleus {ECO:0000255|PROSITE-ProRule:PRU00063, ECO:0000255|PROSITE-ProRule:PRU00475, ECO:0000269|PubMed:11980720, ECO:0000269|PubMed:15543136}. Note=Accumulates in pericentromeric heterochromatin during replication. Targeted to replication foci throughout S phase via its association with PCNA.
Q9UIG0	1006	BAZ1B	BAZ1B_HUMAN Tyrosine-protein kinase BAZ1B OS=Homo sapiens OX=9606 GN=BAZ1B PE=1 SV=2	ELDELLNC#LHPQGIR|ELDELLNC#LHPQGIR	3|2	0.19|0.45	0.32	0.18385	5	2	24.2424		SUBCELLULAR LOCATION: Nucleus {ECO:0000255|PROSITE-ProRule:PRU00063, ECO:0000255|PROSITE-ProRule:PRU00475, ECO:0000269|PubMed:11980720, ECO:0000269|PubMed:15543136}. Note=Accumulates in pericentromeric heterochromatin during replication. Targeted to replication foci throughout S phase via its association with PCNA.
Q9UIG0	497	BAZ1B	BAZ1B_HUMAN Tyrosine-protein kinase BAZ1B OS=Homo sapiens OX=9606 GN=BAZ1B PE=1 SV=2	SALSC#VISK|SALSC#VISK	1|3	0.1|0.03	0.065	0.0495	4	2	6.10329		SUBCELLULAR LOCATION: Nucleus {ECO:0000255|PROSITE-ProRule:PRU00063, ECO:0000255|PROSITE-ProRule:PRU00475, ECO:0000269|PubMed:11980720, ECO:0000269|PubMed:15543136}. Note=Accumulates in pericentromeric heterochromatin during replication. Targeted to replication foci throughout S phase via its association with PCNA.
Q9UIG0	1435	BAZ1B	BAZ1B_HUMAN Tyrosine-protein kinase BAZ1B OS=Homo sapiens OX=9606 GN=BAZ1B PE=1 SV=2	TEQC#LVALLHK|TEQC#LVALLHK	3|3	0.03|0.03	0.03	0	6	2	2.91262		SUBCELLULAR LOCATION: Nucleus {ECO:0000255|PROSITE-ProRule:PRU00063, ECO:0000255|PROSITE-ProRule:PRU00475, ECO:0000269|PubMed:11980720, ECO:0000269|PubMed:15543136}. Note=Accumulates in pericentromeric heterochromatin during replication. Targeted to replication foci throughout S phase via its association with PCNA.
Q8WY36	304	BBX	BBX_HUMAN HMG box transcription factor BBX OS=Homo sapiens OX=9606 GN=BBX PE=1 SV=1	|SALFQLAEMC#LASEGMK	|1	|0.3	0.3	NA	1	1	23.0769		SUBCELLULAR LOCATION: Nucleus {ECO:0000305}.
P50895	237	BCAM	BCAM_HUMAN Basal cell adhesion molecule OS=Homo sapiens OX=9606 GN=BCAM PE=1 SV=2	DASFHC#AAHYSLPEGR|DASFHC#AAHYSLPEGR	4|1	0.62|0.45	0.535	0.12021	5	2	34.8534	Disulfide bond	SUBCELLULAR LOCATION: Membrane; Single-pass type I membrane protein.	Ontology_term=ECO:0000255,ECO:0000269;evidence=ECO:0000255|PROSITE-ProRule:PRU00114,ECO:0000269|PubMed:17638854;Dbxref=PMID:17638854
O75815	261	BCAR3	BCAR3_HUMAN Breast cancer anti-estrogen resistance protein 3 OS=Homo sapiens OX=9606 GN=BCAR3 PE=1 SV=1	C#LEEHYGTSPGQAR|C#LEEHYGTSPGQAR	2|3	0.295|0.75	0.5225	0.32173	5	2	34.3186		SUBCELLULAR LOCATION: Cytoplasm {ECO:0000250|UniProtKB:Q9QZK2}. Cell junction, focal adhesion {ECO:0000250|UniProtKB:Q9QZK2}. Note=Localization to focal adhesions depends on interaction with PTPRA. {ECO:0000250|UniProtKB:Q9QZK2}.
O75815	561	BCAR3	BCAR3_HUMAN Breast cancer anti-estrogen resistance protein 3 OS=Homo sapiens OX=9606 GN=BCAR3 PE=1 SV=1	VIAQHVLSMDC#R|VIAQHVLSMDC#R	1|1	0.77|0.00098	0.38549	0.54378	2	2	27.8234		SUBCELLULAR LOCATION: Cytoplasm {ECO:0000250|UniProtKB:Q9QZK2}. Cell junction, focal adhesion {ECO:0000250|UniProtKB:Q9QZK2}. Note=Localization to focal adhesions depends on interaction with PTPRA. {ECO:0000250|UniProtKB:Q9QZK2}.
O75815	321	BCAR3	BCAR3_HUMAN Breast cancer anti-estrogen resistance protein 3 OS=Homo sapiens OX=9606 GN=BCAR3 PE=1 SV=1	SGSQPAC#LDHMQDR|	1|	0.08|	0.08	NA	1	1	7.40741		SUBCELLULAR LOCATION: Cytoplasm {ECO:0000250|UniProtKB:Q9QZK2}. Cell junction, focal adhesion {ECO:0000250|UniProtKB:Q9QZK2}. Note=Localization to focal adhesions depends on interaction with PTPRA. {ECO:0000250|UniProtKB:Q9QZK2}.
O75815	449	BCAR3	BCAR3_HUMAN Breast cancer anti-estrogen resistance protein 3 OS=Homo sapiens OX=9606 GN=BCAR3 PE=1 SV=1	LPSC#AQGSHTELLTAK|LPSC#AQGSHTELLTAK	2|1	0.06049|0.00098	0.03074	0.04208	3	2	2.98232		SUBCELLULAR LOCATION: Cytoplasm {ECO:0000250|UniProtKB:Q9QZK2}. Cell junction, focal adhesion {ECO:0000250|UniProtKB:Q9QZK2}. Note=Localization to focal adhesions depends on interaction with PTPRA. {ECO:0000250|UniProtKB:Q9QZK2}.
O75363	343	BCAS1	BCAS1_HUMAN Breast carcinoma-amplified sequence 1 OS=Homo sapiens OX=9606 GN=BCAS1 PE=1 SV=2	|GC#NPSGHTQSVTTPEPAK	|1	|0.06	0.06	NA	1	1	5.66038		SUBCELLULAR LOCATION: Cytoplasm {ECO:0000269|PubMed:14567997}.
O75934	132	BCAS2	SPF27_HUMAN Pre-mRNA-splicing factor SPF27 OS=Homo sapiens OX=9606 GN=BCAS2 PE=1 SV=1	|IENLELMSQHGC#NAWK	|2	|0.47549	0.47549	NA	2	1	32.2259		SUBCELLULAR LOCATION: Nucleus {ECO:0000269|PubMed:12169396, ECO:0000269|PubMed:20176811, ECO:0000269|PubMed:28076346, ECO:0000269|PubMed:28502770, ECO:0000269|PubMed:29301961, ECO:0000269|PubMed:29360106, ECO:0000269|PubMed:30705154}. Nucleus, nucleolus {ECO:0000269|PubMed:12429849}.
O75934	106	BCAS2	SPF27_HUMAN Pre-mRNA-splicing factor SPF27 OS=Homo sapiens OX=9606 GN=BCAS2 PE=1 SV=1	NDITAWQEC#VNNSMAQLEHQAVR|NDITAWQEC#VNNSMAQLEHQAVR	1|2	0.36|0.13	0.245	0.16263	3	2	19.6787		SUBCELLULAR LOCATION: Nucleus {ECO:0000269|PubMed:12169396, ECO:0000269|PubMed:20176811, ECO:0000269|PubMed:28076346, ECO:0000269|PubMed:28502770, ECO:0000269|PubMed:29301961, ECO:0000269|PubMed:29360106, ECO:0000269|PubMed:30705154}. Nucleus, nucleolus {ECO:0000269|PubMed:12429849}.
Q9P287	141	BCCIP	BCCIP_HUMAN BRCA2 and CDKN1A-interacting protein OS=Homo sapiens OX=9606 GN=BCCIP PE=1 SV=1	KGTQC#VEQIQELVLR GTQC#VEQIQELVLR|KGTQC#VEQIQELVLR GTQC#VEQIQELVLR	7|7	0.00098|0.07	0.03549	0.0488	14	2	3.42736		SUBCELLULAR LOCATION: Nucleus {ECO:0000269|PubMed:10878006, ECO:0000269|PubMed:11313963, ECO:0000269|PubMed:15713648}. Cytoplasm, cytoskeleton, microtubule organizing center, centrosome, centriole {ECO:0000269|PubMed:28394342}. Cytoplasm, cytoskeleton, spindle pole {ECO:0000269|PubMed:28394342}. Note=Colocalizes with BRCA2 in discrete nuclear foci (PubMed:15713648). In interphase, preferential lo…
P21953	299	BCKDHB	ODBB_HUMAN 2-oxoisovalerate dehydrogenase subunit beta, mitochondrial OS=Homo sapiens OX=9606 GN=BCKDHB PE=1 SV=2	|LGVSC#EVIDLR	|1	|2.68	2.68	NA	1	1	72.8261		SUBCELLULAR LOCATION: Mitochondrion matrix.
P21953	235	BCKDHB	ODBB_HUMAN 2-oxoisovalerate dehydrogenase subunit beta, mitochondrial OS=Homo sapiens OX=9606 GN=BCKDHB PE=1 SV=2	NPC#IFFEPK|NPC#IFFEPK	1|1	0.3|0.55	0.425	0.17678	2	2	29.8246		SUBCELLULAR LOCATION: Mitochondrion matrix.
Q9BXK5	103	BCL2L13	B2L13_HUMAN Bcl-2-like protein 13 OS=Homo sapiens OX=9606 GN=BCL2L13 PE=1 SV=1	HTSPVFSPANPESSMEDC#LAHLGEK|HTSPVFSPANPESSMEDC#LAHLGEK	2|3	1.145|1.32	1.2325	0.12374	5	2	55.2072		SUBCELLULAR LOCATION: [Isoform 2]: Mitochondrion membrane {ECO:0000305}; Single-pass membrane protein {ECO:0000305}. Nucleus {ECO:0000305}.; SUBCELLULAR LOCATION: [Isoform 1]: Nucleus {ECO:0000305}.
Q9Y276	234	BCS1L	BCS1_HUMAN Mitochondrial chaperone BCS1 OS=Homo sapiens OX=9606 GN=BCS1L PE=1 SV=1	GYLLYGPPGC#GK|GYLLYGPPGC#GK	1|2	0.98|0.44049	0.71025	0.38149	3	2	41.529		SUBCELLULAR LOCATION: Mitochondrion inner membrane {ECO:0000269|PubMed:18628306, ECO:0000269|PubMed:9878253}; Single-pass membrane protein {ECO:0000269|PubMed:18628306, ECO:0000269|PubMed:9878253}.
Q14457	391	BECN1	BECN1_HUMAN Beclin-1 OS=Homo sapiens OX=9606 GN=BECN1 PE=1 SV=2	FC#LPYR|FC#LPYR	1|1	2.8|1.25	2.025	1.09602	2	2	66.9421		SUBCELLULAR LOCATION: Cytoplasm {ECO:0000250|UniProtKB:O88597, ECO:0000269|PubMed:19713971, ECO:0000269|PubMed:21364619}. Golgi apparatus, trans-Golgi network membrane {ECO:0000269|PubMed:19050071}; Peripheral membrane protein {ECO:0000269|PubMed:19050071}. Endosome membrane {ECO:0000269|PubMed:23878393}; Peripheral membrane protein {ECO:0000269|PubMed:23878393}. Endoplasmic reticulum membrane {E…
O14503	219	BHLHE40	BHE40_HUMAN Class E basic helix-loop-helix protein 40 OS=Homo sapiens OX=9606 GN=BHLHE40 PE=1 SV=1	NC#VPVIQR|NC#VPVIQR	1|1	0.96|0.62	0.79	0.24042	2	2	44.1341		SUBCELLULAR LOCATION: Cytoplasm {ECO:0000269|PubMed:21829689}. Nucleus {ECO:0000269|PubMed:11278694, ECO:0000269|PubMed:21829689, ECO:0000269|PubMed:28797635}. Note=Predominantly localized in the nucleus (PubMed:11278694). {ECO:0000269|PubMed:11278694}.
Q9H694	164	BICC1	BICC1_HUMAN Protein bicaudal C homolog 1 OS=Homo sapiens OX=9606 GN=BICC1 PE=1 SV=2	VMEETGC#HIHFPDSNR|VMEETGC#HIHFPDSNR	3|4	0.28|0.18049	0.23025	0.07036	7	2	18.7157		SUBCELLULAR LOCATION: Cytoplasm {ECO:0000250}.
Q9NR09	1236	BIRC6	BIRC6_HUMAN Baculoviral IAP repeat-containing protein 6 OS=Homo sapiens OX=9606 GN=BIRC6 PE=1 SV=2	GTEEIC#NGGMRPVVR|	1|	1.35|	1.35	NA	1	1	57.4468		SUBCELLULAR LOCATION: Golgi apparatus, trans-Golgi network membrane {ECO:0000269|PubMed:18329369}. Endosome {ECO:0000269|PubMed:18329369}. Cytoplasm, cytoskeleton, spindle pole {ECO:0000269|PubMed:18329369}. Cytoplasm, cytoskeleton, microtubule organizing center, centrosome {ECO:0000269|PubMed:18329369}. Midbody, Midbody ring {ECO:0000269|PubMed:18329369}. Note=Exhibits cell cycle-dependent local…
Q9NR09	1392	BIRC6	BIRC6_HUMAN Baculoviral IAP repeat-containing protein 6 OS=Homo sapiens OX=9606 GN=BIRC6 PE=1 SV=2	VC#FFEAGR|VC#FFEAGR	1|2	0.64|0.415	0.5275	0.1591	3	2	34.5336		SUBCELLULAR LOCATION: Golgi apparatus, trans-Golgi network membrane {ECO:0000269|PubMed:18329369}. Endosome {ECO:0000269|PubMed:18329369}. Cytoplasm, cytoskeleton, spindle pole {ECO:0000269|PubMed:18329369}. Cytoplasm, cytoskeleton, microtubule organizing center, centrosome {ECO:0000269|PubMed:18329369}. Midbody, Midbody ring {ECO:0000269|PubMed:18329369}. Note=Exhibits cell cycle-dependent local…
Q9NR09	2892	BIRC6	BIRC6_HUMAN Baculoviral IAP repeat-containing protein 6 OS=Homo sapiens OX=9606 GN=BIRC6 PE=1 SV=2	AC#FGGLFANLIRPGDAK|AC#FGGLFANLIRPGDAK	1|1	0.25|0.18	0.215	0.0495	2	2	17.6955		SUBCELLULAR LOCATION: Golgi apparatus, trans-Golgi network membrane {ECO:0000269|PubMed:18329369}. Endosome {ECO:0000269|PubMed:18329369}. Cytoplasm, cytoskeleton, spindle pole {ECO:0000269|PubMed:18329369}. Cytoplasm, cytoskeleton, microtubule organizing center, centrosome {ECO:0000269|PubMed:18329369}. Midbody, Midbody ring {ECO:0000269|PubMed:18329369}. Note=Exhibits cell cycle-dependent local…
Q9NR09	1319	BIRC6	BIRC6_HUMAN Baculoviral IAP repeat-containing protein 6 OS=Homo sapiens OX=9606 GN=BIRC6 PE=1 SV=2	C#AMLQFSEFHEK|C#AMLQFSEFHEK	1|1	0.06|0.03	0.045	0.02121	2	2	4.30622		SUBCELLULAR LOCATION: Golgi apparatus, trans-Golgi network membrane {ECO:0000269|PubMed:18329369}. Endosome {ECO:0000269|PubMed:18329369}. Cytoplasm, cytoskeleton, spindle pole {ECO:0000269|PubMed:18329369}. Cytoplasm, cytoskeleton, microtubule organizing center, centrosome {ECO:0000269|PubMed:18329369}. Midbody, Midbody ring {ECO:0000269|PubMed:18329369}. Note=Exhibits cell cycle-dependent local…
P54132	468	BLM	BLM_HUMAN Bloom syndrome protein OS=Homo sapiens OX=9606 GN=BLM PE=1 SV=1	ELNFSHLPSNSVSPGDC#LLTTTLGK|	1|	0.33|	0.33	NA	1	1	24.812		SUBCELLULAR LOCATION: Nucleus {ECO:0000269|PubMed:23509288}. Note=Together with SPIDR, is redistributed in discrete nuclear DNA damage-induced foci following hydroxyurea (HU) or camptothecin (CPT) treatment. Accumulated at sites of DNA damage in a RMI complex- and SPIDR-dependent manner.
Q13867	40	BLMH	BLMH_HUMAN Bleomycin hydrolase OS=Homo sapiens OX=9606 GN=BLMH PE=1 SV=1	QNVGTTHDLLDIC#LK LNSDPQFVLAQNVGTTHDLLDIC#LK|QNVGTTHDLLDIC#LK LNSDPQFVLAQNVGTTHDLLDIC#LK	3|3	0.42|3.78	2.1	2.37588	6	2	67.7419		SUBCELLULAR LOCATION: Cytoplasm.
Q13867	269	BLMH	BLMH_HUMAN Bleomycin hydrolase OS=Homo sapiens OX=9606 GN=BLMH PE=1 SV=1	IC#LVNDPRPQHK|IC#LVNDPRPQHK	1|2	0.08|0.075	0.0775	0.00354	3	2	7.19258		SUBCELLULAR LOCATION: Cytoplasm.
P53004	281	BLVRA	BIEA_HUMAN Biliverdin reductase A OS=Homo sapiens OX=9606 GN=BLVRA PE=1 SV=2	ILHC#LGLAEEIQK|ILHC#LGLAEEIQK	4|4	0.01277|0.025	0.01888	0.00865	8	2	1.85302	Metal binding	SUBCELLULAR LOCATION: Cytoplasm.	Note=Zinc;Ontology_term=ECO:0000255;evidence=ECO:0000255
P53004	204	BLVRA	BIEA_HUMAN Biliverdin reductase A OS=Homo sapiens OX=9606 GN=BLVRA PE=1 SV=2	MTVC#LETEK|MTVC#LETEK	4|3	1.65|1.53	1.59	0.08485	7	2	61.39		SUBCELLULAR LOCATION: Cytoplasm.
P30043	109	BLVRB	BLVRB_HUMAN Flavin reductase (NADPH) OS=Homo sapiens OX=9606 GN=BLVRB PE=1 SV=3	VVAC#TSAFLLWDPTKVPPR VVAC#TSAFLLWDPTK|VVAC#TSAFLLWDPTKVPPR	2|1	2.935|0.26	1.5975	1.89151	3	2	61.5014		SUBCELLULAR LOCATION: Cytoplasm {ECO:0000269|PubMed:7929092}.
P30043	188	BLVRB	BLVRB_HUMAN Flavin reductase (NADPH) OS=Homo sapiens OX=9606 GN=BLVRB PE=1 SV=3	C#LTTDEYDGHSTYPSHQYQ|C#LTTDEYDGHSTYPSHQYQ	6|6	0.055|0.085	0.07	0.02121	12	2	6.54206		SUBCELLULAR LOCATION: Cytoplasm {ECO:0000269|PubMed:7929092}.
Q14692	101	BMS1	BMS1_HUMAN Ribosome biogenesis protein BMS1 homolog OS=Homo sapiens OX=9606 GN=BMS1 PE=1 SV=1	STLIQC#LIR|STLIQC#LIR	3|2	0.00098|0.04	0.02049	0.02759	5	2	2.00786		SUBCELLULAR LOCATION: Nucleus, nucleolus {ECO:0000250}.
Q9H3K6	59	BOLA2	BOLA2_HUMAN BolA-like protein 2 OS=Homo sapiens OX=9606 GN=BOLA2 PE=1 SV=1	AC#LAEELPHIHAFEQK LVNAC#LAEELPHIHAFEQK|AC#LAEELPHIHAFEQK LVNAC#LAEELPHIHAFEQK	8|12	0.01049|0.02	0.01524	0.00672	20	2	1.50112		SUBCELLULAR LOCATION: Cytoplasm {ECO:0000269|PubMed:22746225}. Nucleus {ECO:0000269|PubMed:22746225}.
Q14137	108	BOP1	BOP1_HUMAN Ribosome biogenesis protein BOP1 OS=Homo sapiens OX=9606 GN=BOP1 PE=1 SV=2	KTTEEQVQASTPC#PR TTEEQVQASTPC#PR|KTTEEQVQASTPC#PR	3|2	0.46|0.2	0.33	0.18385	5	2	24.812		SUBCELLULAR LOCATION: Nucleus, nucleolus {ECO:0000255|HAMAP-Rule:MF_03027, ECO:0000269|PubMed:12429849}. Nucleus, nucleoplasm {ECO:0000255|HAMAP-Rule:MF_03027, ECO:0000269|PubMed:12429849}.
Q14137	532	BOP1	BOP1_HUMAN Ribosome biogenesis protein BOP1 OS=Homo sapiens OX=9606 GN=BOP1 PE=1 SV=2	|IC#HGKPVTQVTWHGR	|1	|0.12	0.12	NA	1	1	10.7143		SUBCELLULAR LOCATION: Nucleus, nucleolus {ECO:0000255|HAMAP-Rule:MF_03027, ECO:0000269|PubMed:12429849}. Nucleus, nucleoplasm {ECO:0000255|HAMAP-Rule:MF_03027, ECO:0000269|PubMed:12429849}.
Q14137	637	BOP1	BOP1_HUMAN Ribosome biogenesis protein BOP1 OS=Homo sapiens OX=9606 GN=BOP1 PE=1 SV=2	WVSSLAVHPAGDNVIC#GSYDSK|WVSSLAVHPAGDNVIC#GSYDSK	2|1	0.14049|0.00098	0.07074	0.09865	3	2	6.60665		SUBCELLULAR LOCATION: Nucleus, nucleolus {ECO:0000255|HAMAP-Rule:MF_03027, ECO:0000269|PubMed:12429849}. Nucleus, nucleoplasm {ECO:0000255|HAMAP-Rule:MF_03027, ECO:0000269|PubMed:12429849}.
Q969J3	103	BORCS5	BORC5_HUMAN BLOC-1-related complex subunit 5 OS=Homo sapiens OX=9606 GN=BORCS5 PE=1 SV=1	YQDHLHQC#AEAVAFDQNALVK|YQDHLHQC#AEAVAFDQNALVK	1|2	0.12|0.665	0.3925	0.38537	3	2	28.1867		SUBCELLULAR LOCATION: Lysosome membrane {ECO:0000269|PubMed:25898167}; Lipid-anchor {ECO:0000269|PubMed:25898167}; Cytoplasmic side {ECO:0000269|PubMed:25898167}.
Q96GS4	356	BORCS6	BORC6_HUMAN BLOC-1-related complex subunit 6 OS=Homo sapiens OX=9606 GN=BORCS6 PE=1 SV=2	TLEVLEALC#K|	1|	0.37|	0.37	NA	1	1	27.0073		SUBCELLULAR LOCATION: Lysosome membrane {ECO:0000305|PubMed:25898167}.
P07738	23	BPGM	PMGE_HUMAN Bisphosphoglycerate mutase OS=Homo sapiens OX=9606 GN=BPGM PE=1 SV=2	FC#SWVDQK|	1|	0.1|	0.1	NA	1	1	9.09091
Q86WA6	234	BPHL	BPHL_HUMAN Valacyclovir hydrolase OS=Homo sapiens OX=9606 GN=BPHL PE=1 SV=1	VQC#PALIVHGEK VQC#PALIVHGEKDPLVPR|VQC#PALIVHGEK VQC#PALIVHGEKDPLVPR	9|11	0.13|0.08	0.105	0.03536	20	2	9.50226
O95861	100	BPNT1	BPNT1_HUMAN 3'(2'),5'-bisphosphate nucleotidase 1 OS=Homo sapiens OX=9606 GN=BPNT1 PE=1 SV=1	QPC#PSQYSAIK|QPC#PSQYSAIK	1|1	0.00098|0.94	0.47049	0.66399	2	2	31.9955
O95861	243	BPNT1	BPNT1_HUMAN 3'(2'),5'-bisphosphate nucleotidase 1 OS=Homo sapiens OX=9606 GN=BPNT1 PE=1 SV=1	ASAYVFASPGC#K|	1|	0.13|	0.13	NA	1	1	11.5044
O95861	249	BPNT1	BPNT1_HUMAN 3'(2'),5'-bisphosphate nucleotidase 1 OS=Homo sapiens OX=9606 GN=BPNT1 PE=1 SV=1	KWDTC#APEVILHAVGGK WDTC#APEVILHAVGGK|KWDTC#APEVILHAVGGK WDTC#APEVILHAVGGK	4|3	0.08|0.14	0.11	0.04243	7	2	9.90991
O95861	59	BPNT1	BPNT1_HUMAN 3'(2'),5'-bisphosphate nucleotidase 1 OS=Homo sapiens OX=9606 GN=BPNT1 PE=1 SV=1	LAQMSIC#SSLAR|LAQMSIC#SSLAR	1|1	0.00098|0.00098	0.00098	0	2	2	0
Q6PJG6	246	BRAT1	BRAT1_HUMAN BRCA1-associated ATM activator 1 OS=Homo sapiens OX=9606 GN=BRAT1 PE=1 SV=2	VAC#LLER|	1|	0.15|	0.15	NA	1	1	13.0435		SUBCELLULAR LOCATION: Nucleus {ECO:0000269|PubMed:16452482, ECO:0000269|PubMed:25631046}. Cytoplasm {ECO:0000269|PubMed:25631046}. Note=Present at double strand breaks (DSBs)following ionizing radiation treatment. The ubiquitinated form localizes in the nucleus in a NDFIP1-dependent manner. {ECO:0000269|PubMed:16452482, ECO:0000269|PubMed:25631046}.
P38398	27	BRCA1	BRCA1_HUMAN Breast cancer type 1 susceptibility protein OS=Homo sapiens OX=9606 GN=BRCA1 PE=1 SV=2	|PIC#LELIK	|1	|0.00098	0.00098	NA	1	1	0		SUBCELLULAR LOCATION: Nucleus {ECO:0000269|PubMed:15133502, ECO:0000269|PubMed:17525340, ECO:0000269|PubMed:20160719, ECO:0000269|PubMed:21144835, ECO:0000269|PubMed:26778126, ECO:0000269|PubMed:9528852}. Chromosome {ECO:0000269|PubMed:23269703, ECO:0000269|PubMed:25472942, ECO:0000269|PubMed:26778126}. Cytoplasm {ECO:0000269|PubMed:20160719}. Note=Localizes at sites of DNA damage at double-stran…
Q15059	387	BRD3	BRD3_HUMAN Bromodomain-containing protein 3 OS=Homo sapiens OX=9606 GN=BRD3 PE=1 SV=1	LMFSNC#YK|LMFSNC#YK	2|2	0.09|0.07	0.08	0.01414	4	2	7.40741		SUBCELLULAR LOCATION: Nucleus {ECO:0000250|UniProtKB:Q8K2F0}. Note=Detected on chromatin. {ECO:0000250|UniProtKB:Q8K2F0}.
Q9NPI1	367	BRD7	BRD7_HUMAN Bromodomain-containing protein 7 OS=Homo sapiens OX=9606 GN=BRD7 PE=1 SV=1	KPDGTTTLGLLHPVDPIVGEPGYC#PVR|	1|	3.83|	3.83	NA	1	1	79.2961		SUBCELLULAR LOCATION: [Isoform 2]: Nucleus.
Q9NPI1	107	BRD7	BRD7_HUMAN Bromodomain-containing protein 7 OS=Homo sapiens OX=9606 GN=BRD7 PE=1 SV=1	VENEAEKDLQC#HAPVR|VENEAEKDLQC#HAPVR	2|1	0.1|0.11	0.105	0.00707	3	2	9.50226		SUBCELLULAR LOCATION: [Isoform 2]: Nucleus.
Q9H0E9	26	BRD8	BRD8_HUMAN Bromodomain-containing protein 8 OS=Homo sapiens OX=9606 GN=BRD8 PE=1 SV=2	LC#LASSVMR|	1|	0.52|	0.52	NA	1	1	34.2105		SUBCELLULAR LOCATION: Nucleus.
Q8TDN6	107	BRIX1	BRX1_HUMAN Ribosome biogenesis protein BRX1 homolog OS=Homo sapiens OX=9606 GN=BRIX1 PE=1 SV=2	DKLFVINEVC#EMK LFVINEVC#EMK|DKLFVINEVC#EMK LFVINEVC#EMK	3|4	0.8|4.255	2.5275	2.44305	7	2	71.6513		SUBCELLULAR LOCATION: Nucleus, nucleolus.
Q8TDN6	115	BRIX1	BRX1_HUMAN Ribosome biogenesis protein BRX1 homolog OS=Homo sapiens OX=9606 GN=BRIX1 PE=1 SV=2	C#IYFEAK|C#IYFEAK	3|2	0.03|0.51	0.27	0.33941	5	2	21.2598		SUBCELLULAR LOCATION: Nucleus, nucleolus.
Q8TDN6	52	BRIX1	BRX1_HUMAN Ribosome biogenesis protein BRX1 homolog OS=Homo sapiens OX=9606 GN=BRIX1 PE=1 SV=2	IPGPVC#K|IPGPVC#K	1|1	0.1|0.00098	0.05049	0.07002	2	2	4.80633		SUBCELLULAR LOCATION: Nucleus, nucleolus.
Q5PSV4	137	BRMS1L	BRM1L_HUMAN Breast cancer metastasis-suppressor 1-like protein OS=Homo sapiens OX=9606 GN=BRMS1L PE=1 SV=2	|NKYEC#EIQASR	|1	|0.09	0.09	NA	1	1	8.25688		SUBCELLULAR LOCATION: Nucleus {ECO:0000305}.
P35613	242	BSG	BASI_HUMAN Basigin OS=Homo sapiens OX=9606 GN=BSG PE=1 SV=2	SSEHINEGETAMLVC#K|SSEHINEGETAMLVC#K	4|4	0.32|0.465	0.3925	0.10253	8	2	28.1867	Disulfide bond	SUBCELLULAR LOCATION: Cell membrane {ECO:0000269|PubMed:15946952, ECO:0000269|PubMed:17127621, ECO:0000269|PubMed:21536654, ECO:0000269|PubMed:26195724, ECO:0000269|PubMed:28409866}; Single-pass type I membrane protein {ECO:0000303|PubMed:15946952}. Melanosome {ECO:0000269|PubMed:17081065}. Note=Identified by mass spectrometry in melanosome fractions from stage I to stage IV. In spermatozoa, loca…	Ontology_term=ECO:0000244,ECO:0000244,ECO:0000269,ECO:0000269;evidence=ECO:0000244|PDB:3B5H,ECO:0000244|PDB:4U0Q,ECO:0000269|PubMed:18430721,ECO:0000269|PubMed:25132548;Dbxref=PMID:18430721,PMID:25132548
O14981	1401	BTAF1	BTAF1_HUMAN TATA-binding protein-associated factor 172 OS=Homo sapiens OX=9606 GN=BTAF1 PE=1 SV=2	FNYC#ILDEGHVIK|FNYC#ILDEGHVIK	2|1	0.79|1.57	1.18	0.55154	3	2	54.1284		SUBCELLULAR LOCATION: Nucleus.
O14981	1290	BTAF1	BTAF1_HUMAN TATA-binding protein-associated factor 172 OS=Homo sapiens OX=9606 GN=BTAF1 PE=1 SV=2	LHGILC#DDMGLGK|	1|	0.65|	0.65	NA	1	1	39.3939		SUBCELLULAR LOCATION: Nucleus.
Q9H0C5	167	BTBD1	BTBD1_HUMAN BTB/POZ domain-containing protein 1 OS=Homo sapiens OX=9606 GN=BTBD1 PE=1 SV=1	YAVPALEAHC#VEFLTK|YAVPALEAHC#VEFLTK	1|1	0.00098|0.00098	0.00098	0	2	2	0		SUBCELLULAR LOCATION: Cytoplasm {ECO:0000269|PubMed:11818025, ECO:0000269|PubMed:12878161}. Note=Localizes to punctate or elongated cytoplasmic bodies. {ECO:0000269|PubMed:11818025, ECO:0000269|PubMed:12878161}.
A6QL63	1027	BTBD11	BTBDB_HUMAN Ankyrin repeat and BTB/POZ domain-containing protein BTBD11 OS=Homo sapiens OX=9606 GN=BTBD11 PE=2 SV=3	SINTDNC#VDIYNHAK|SINTDNC#VDIYNHAK	2|1	0.26|0.00098	0.13049	0.18315	3	2	11.5428		SUBCELLULAR LOCATION: Membrane {ECO:0000305}; Single-pass membrane protein {ECO:0000305}.
A6QL63	382	BTBD11	BTBDB_HUMAN Ankyrin repeat and BTB/POZ domain-containing protein BTBD11 OS=Homo sapiens OX=9606 GN=BTBD11 PE=2 SV=3	NASGVLC#LPDSLNLHR|NASGVLC#LPDSLNLHR	3|4	0.07|0.14	0.105	0.0495	7	2	9.50226		SUBCELLULAR LOCATION: Membrane {ECO:0000305}; Single-pass membrane protein {ECO:0000305}.
O60566	700	BUB1B	BUB1B_HUMAN Mitotic checkpoint serine/threonine-protein kinase BUB1 beta OS=Homo sapiens OX=9606 GN=BUB1B PE=1 SV=3	|C#LQIPEK	|1	|0.06	0.06	NA	1	1	5.66038		SUBCELLULAR LOCATION: Cytoplasm. Nucleus. Chromosome, centromere, kinetochore. Cytoplasm, cytoskeleton, microtubule organizing center, centrosome. Note=Cytoplasmic in interphase cells. Associates with the kinetochores in early prophase. Kinetochore localization requires BUB1, PLK1 and KNL1.
O43684	270	BUB3	BUB3_HUMAN Mitotic checkpoint protein BUB3 OS=Homo sapiens OX=9606 GN=BUB3 PE=1 SV=1	LC#QFHR|LC#QFHR	4|3	0.845|0.49	0.6675	0.25102	7	2	40.03		SUBCELLULAR LOCATION: Nucleus. Chromosome, centromere, kinetochore {ECO:0000250}. Note=Starts to localize at kinetochores in prometaphase I (Pro-MI) stage and maintains the localization until the metaphase I-anaphase I (MI-AI) transition. {ECO:0000250}.
O43684	62	BUB3	BUB3_HUMAN Mitotic checkpoint protein BUB3 OS=Homo sapiens OX=9606 GN=BUB3 PE=1 SV=1	YQHTGAVLDC#AFYDPTHAWSGGLDHQLK|YQHTGAVLDC#AFYDPTHAWSGGLDHQLK	2|2	0.08549|0.21549	0.15049	0.09192	4	2	13.0805		SUBCELLULAR LOCATION: Nucleus. Chromosome, centromere, kinetochore {ECO:0000250}. Note=Starts to localize at kinetochores in prometaphase I (Pro-MI) stage and maintains the localization until the metaphase I-anaphase I (MI-AI) transition. {ECO:0000250}.
P41223	78	BUD31	BUD31_HUMAN Protein BUD31 homolog OS=Homo sapiens OX=9606 GN=BUD31 PE=1 SV=2	ELYEYC#IK|	1|	0.29|	0.29	NA	1	1	22.4806		SUBCELLULAR LOCATION: Nucleus {ECO:0000269|PubMed:25091737, ECO:0000269|PubMed:28076346, ECO:0000269|PubMed:28502770}. Note=Detected in chromatin at the promoter of AR target genes. {ECO:0000305|PubMed:25091737}.
Q7L1Q6	349	BZW1	BZW1_HUMAN Basic leucine zipper and W2 domain-containing protein 1 OS=Homo sapiens OX=9606 GN=BZW1 PE=1 SV=1	IQEYC#YDNIHFMK|IQEYC#YDNIHFMK	4|4	0.16|0.045	0.1025	0.08132	8	2	9.29705
Q9Y6E2	350	BZW2	BZW2_HUMAN Basic leucine zipper and W2 domain-containing protein 2 OS=Homo sapiens OX=9606 GN=BZW2 PE=1 SV=1	VQEYC#YDNIHFMK|VQEYC#YDNIHFMK	4|4	0.875|6.59	3.7325	4.04112	8	2	78.8695
Q9Y6E2	97	BZW2	BZW2_HUMAN Basic leucine zipper and W2 domain-containing protein 2 OS=Homo sapiens OX=9606 GN=BZW2 PE=1 SV=1	MTNHC#VFSANEDHETIR|MTNHC#VFSANEDHETIR	7|10	0.18|0.16	0.17	0.01414	17	2	14.5299
Q9H0W9	187	C11orf54	CK054_HUMAN Ester hydrolase C11orf54 OS=Homo sapiens OX=9606 GN=C11orf54 PE=1 SV=1	TGPLNFVTC#MR|TGPLNFVTC#MR	8|5	0.31|0.49	0.4	0.12728	13	2	28.5714		SUBCELLULAR LOCATION: Nucleus {ECO:0000269|PubMed:16522806}.
Q9H0W9	226	C11orf54	CK054_HUMAN Ester hydrolase C11orf54 OS=Homo sapiens OX=9606 GN=C11orf54 PE=1 SV=1	SHIMPAEFSSC#PLNSDEEVNK|SHIMPAEFSSC#PLNSDEEVNK	3|2	0.00098|0.04549	0.02324	0.03147	5	2	2.27122		SUBCELLULAR LOCATION: Nucleus {ECO:0000269|PubMed:16522806}.
Q9H0W9	249	C11orf54	CK054_HUMAN Ester hydrolase C11orf54 OS=Homo sapiens OX=9606 GN=C11orf54 PE=1 SV=1	APLVC#LPVFVSR|APLVC#LPVFVSR	2|2	0.00098|0.00098	0.00098	0	4	2	0		SUBCELLULAR LOCATION: Nucleus {ECO:0000269|PubMed:16522806}.
Q9H3H3	263	C11orf68	CK068_HUMAN UPF0696 protein C11orf68 OS=Homo sapiens OX=9606 GN=C11orf68 PE=1 SV=3	WHLC#PTLYESR|WHLC#PTLYESR	2|3	0.11|0.08	0.095	0.02121	5	2	8.6758
Q9HB07	305	C12orf10	MYG1_HUMAN UPF0160 protein MYG1, mitochondrial OS=Homo sapiens OX=9606 GN=C12orf10 PE=1 SV=2	IQC#VPK|IQC#VPK	2|2	0.00098|0.00098	0.00098	0	4	2	0		SUBCELLULAR LOCATION: Nucleus {ECO:0000269|PubMed:19014353}. Mitochondrion {ECO:0000269|PubMed:19014353}.
Q8N999	302	C12orf29	CL029_HUMAN Uncharacterized protein C12orf29 OS=Homo sapiens OX=9606 GN=C12orf29 PE=1 SV=2	|C#LFNHFLK	|1	|0.51	0.51	NA	1	1	33.7748
Q8N999	13	C12orf29	CL029_HUMAN Uncharacterized protein C12orf29 OS=Homo sapiens OX=9606 GN=C12orf29 PE=1 SV=2	MPC#VFVTEVK|MPC#VFVTEVK	2|1	0.2|0.13	0.165	0.0495	3	2	14.1631
Q96GQ5	201	C16orf58	RUS1_HUMAN RUS1 family protein C16orf58 OS=Homo sapiens OX=9606 GN=C16orf58 PE=1 SV=2	C#IVSVAGGATR|C#IVSVAGGATR	1|1	0.05|0.22	0.135	0.12021	2	2	11.8943		SUBCELLULAR LOCATION: Membrane {ECO:0000305}; Single-pass membrane protein {ECO:0000305}.
Q9BSU1	245	C16orf70	CP070_HUMAN UPF0183 protein C16orf70 OS=Homo sapiens OX=9606 GN=C16orf70 PE=1 SV=1	SVYFGDSC#QDVLSMLGSPHK|SVYFGDSC#QDVLSMLGSPHK	1|2	0.23|0.09	0.16	0.09899	3	2	13.7931
Q8N3J3	3	C17orf53	CQ053_HUMAN Uncharacterized protein C17orf53 OS=Homo sapiens OX=9606 GN=C17orf53 PE=1 SV=1	AC#SLQK|	1|	0.07|	0.07	NA	1	1	6.54206		SUBCELLULAR LOCATION: Nucleus {ECO:0000269|PubMed:31467087}. Chromosome {ECO:0000269|PubMed:31467087}. Note=Localized to the sites of DNA damage. {ECO:0000269|PubMed:31467087}.
Q9HAS0	350	C17orf75	NJMU_HUMAN Protein Njmu-R1 OS=Homo sapiens OX=9606 GN=C17orf75 PE=1 SV=2	C#YMFLK|	1|	0.04|	0.04	NA	1	1	3.84615		SUBCELLULAR LOCATION: Golgi apparatus, trans-Golgi network {ECO:0000269|PubMed:29426865}. Cytoplasmic vesicle {ECO:0000269|PubMed:29426865}.
Q9BSJ5	332	C17orf80	CQ080_HUMAN Uncharacterized protein C17orf80 OS=Homo sapiens OX=9606 GN=C17orf80 PE=2 SV=2	|TVMSHGC#ENFNTR	|1	|0.18	0.18	NA	1	1	15.2542		SUBCELLULAR LOCATION: Membrane {ECO:0000305}; Single-pass membrane protein {ECO:0000305}.
Q9BSJ5	228	C17orf80	CQ080_HUMAN Uncharacterized protein C17orf80 OS=Homo sapiens OX=9606 GN=C17orf80 PE=2 SV=2	LLDVPTGDC#HISPK|	1|	0.00098|	0.00098	NA	1	1	0		SUBCELLULAR LOCATION: Membrane {ECO:0000305}; Single-pass membrane protein {ECO:0000305}.
Q32NC0	104	C18orf21	CR021_HUMAN UPF0711 protein C18orf21 OS=Homo sapiens OX=9606 GN=C18orf21 PE=1 SV=1	SVLLITC#K|SVLLITC#K	3|1	2.52|0.99	1.755	1.08187	4	2	63.7024
Q5BKX5	186	C19orf54	CS054_HUMAN UPF0692 protein C19orf54 OS=Homo sapiens OX=9606 GN=C19orf54 PE=1 SV=2	LAQEVLGC#QAK|	1|	1.83|	1.83	NA	1	1	64.6643
Q07021	186	C1QBP	C1QBP_HUMAN Complement component 1 Q subcomponent-binding protein, mitochondrial OS=Homo sapiens OX=9606 GN=C1QBP PE=1 SV=1	ALVLDC#HYPEDEVGQEDEAESDIFSIR|ALVLDC#HYPEDEVGQEDEAESDIFSIR	5|4	0.61|0.385	0.4975	0.1591	9	2	33.222		SUBCELLULAR LOCATION: Mitochondrion matrix {ECO:0000269|PubMed:15031724, ECO:0000269|PubMed:17486078, ECO:0000269|PubMed:19164550, ECO:0000269|PubMed:9305894}. Nucleus {ECO:0000269|PubMed:18676636}. Cell membrane {ECO:0000269|PubMed:10747014, ECO:0000269|PubMed:11493647, ECO:0000269|PubMed:12574814, ECO:0000269|PubMed:8195709, ECO:0000269|PubMed:8662673, ECO:0000269|PubMed:9191880, ECO:0000269|Pu…
Q9Y426	413	C2CD2	C2CD2_HUMAN C2 domain-containing protein 2 OS=Homo sapiens OX=9606 GN=C2CD2 PE=1 SV=2	TVMPC#GTVVTTVTAVK|	1|	0.21|	0.21	NA	1	1	17.3554		SUBCELLULAR LOCATION: Membrane {ECO:0000305}; Single-pass membrane protein {ECO:0000305}.
Q86YS7	148	C2CD5	C2CD5_HUMAN C2 domain-containing protein 5 OS=Homo sapiens OX=9606 GN=C2CD5 PE=1 SV=1	|FFC#TTSIPK	|1	|0.26	0.26	NA	1	1	20.6349		SUBCELLULAR LOCATION: Cytoplasmic vesicle membrane {ECO:0000269|PubMed:21907143}. Cytoplasm, cell cortex {ECO:0000269|PubMed:21907143}. Cell membrane {ECO:0000269|PubMed:21907143}. Cell projection, ruffle {ECO:0000269|PubMed:21907143}. Note=Dynamically associated with GLUT4-containing glucose storage vesicles (GSV) and plasma membrane in response to insulin stimulation.
Q86YS7	512	C2CD5	C2CD5_HUMAN C2 domain-containing protein 5 OS=Homo sapiens OX=9606 GN=C2CD5 PE=1 SV=1	|GC#LIQAR	|1	|0.16	0.16	NA	1	1	13.7931		SUBCELLULAR LOCATION: Cytoplasmic vesicle membrane {ECO:0000269|PubMed:21907143}. Cytoplasm, cell cortex {ECO:0000269|PubMed:21907143}. Cell membrane {ECO:0000269|PubMed:21907143}. Cell projection, ruffle {ECO:0000269|PubMed:21907143}. Note=Dynamically associated with GLUT4-containing glucose storage vesicles (GSV) and plasma membrane in response to insulin stimulation.
Q86YS7	867	C2CD5	C2CD5_HUMAN C2 domain-containing protein 5 OS=Homo sapiens OX=9606 GN=C2CD5 PE=1 SV=1	SAPPC#ANSTVGVVK|SAPPC#ANSTVGVVK	1|2	0.00098|0.00098	0.00098	0	3	2	0		SUBCELLULAR LOCATION: Cytoplasmic vesicle membrane {ECO:0000269|PubMed:21907143}. Cytoplasm, cell cortex {ECO:0000269|PubMed:21907143}. Cell membrane {ECO:0000269|PubMed:21907143}. Cell projection, ruffle {ECO:0000269|PubMed:21907143}. Note=Dynamically associated with GLUT4-containing glucose storage vesicles (GSV) and plasma membrane in response to insulin stimulation.
Q6P1X6	66	C8orf82	CH082_HUMAN UPF0598 protein C8orf82 OS=Homo sapiens OX=9606 GN=C8orf82 PE=1 SV=2	NFITC#FK|	1|	0.18|	0.18	NA	1	1	15.2542
Q5T6V5	170	C9orf64	QSPP_HUMAN Queuosine salvage protein OS=Homo sapiens OX=9606 GN=C9orf64 PE=1 SV=1	FGGSFLNC#VR|	1|	0.04|	0.04	NA	1	1	3.84615
O43570	259	CA12	CAH12_HUMAN Carbonic anhydrase 12 OS=Homo sapiens OX=9606 GN=CA12 PE=1 SV=1	NPVQISQEQLLALETALYC#THMDDPSPR|NPVQISQEQLLALETALYC#THMDDPSPR	4|4	1.26|0.765	1.0125	0.35002	8	2	50.3106		SUBCELLULAR LOCATION: Membrane; Single-pass type I membrane protein. Cell membrane {ECO:0000269|PubMed:26911677}.
P35219	77	CA8	CAH8_HUMAN Carbonic anhydrase-related protein OS=Homo sapiens OX=9606 GN=CA8 PE=1 SV=3	LSPNYVVC#R|LSPNYVVC#R	6|5	0.02|0.01	0.015	0.00707	11	2	1.47783
P54289	697	CACNA2D1	CA2D1_HUMAN Voltage-dependent calcium channel subunit alpha-2/delta-1 OS=Homo sapiens OX=9606 GN=CACNA2D1 PE=1 SV=3	|KTPNNPSC#NADLINR	|1	|0.35	0.35	NA	1	1	25.9259		SUBCELLULAR LOCATION: Membrane {ECO:0000305}; Single-pass type I membrane protein {ECO:0000305}.
Q9HB71	154	CACYBP	CYBP_HUMAN Calcyclin-binding protein OS=Homo sapiens OX=9606 GN=CACYBP PE=1 SV=2	TDTVLILC#R|TDTVLILC#R	3|1	0.02|0.00098	0.01049	0.01345	4	2	1.03811		SUBCELLULAR LOCATION: Nucleus {ECO:0000269|PubMed:12895292}. Cytoplasm {ECO:0000269|PubMed:12895292}. Note=Cytoplasmic at low calcium concentrations. In neuroblastoma cells, after a retinoic acid (RA) induction and calcium increase, it localizes in both the nucleus and cytoplasm. The nuclear fraction may be phosphorylated.
P27708	1613	CAD	PYR1_HUMAN CAD protein OS=Homo sapiens OX=9606 GN=CAD PE=1 SV=3	SVHIC#HVAR|SVHIC#HVAR	1|2	1.03|0.50049	0.76524	0.37442	3	2	43.3505	Metal binding$Mutagenesis	SUBCELLULAR LOCATION: Cytoplasm {ECO:0000269|PubMed:15890648}. Nucleus {ECO:0000269|PubMed:15890648}. Note=Cytosolic and unphosphorylated in resting cells, translocates to the nucleus in response to EGF stimulation, nuclear import promotes optimal cell growth.	Note=Zinc 2;Ontology_term=ECO:0000269;evidence=ECO:0000269|PubMed:24332717;Dbxref=PMID:24332717$Note=Reduces dihydroorotase activity. C->S;Ontology_term=ECO:0000269;evidence=ECO:0000269|PubMed:24332717;Dbxref=PMID:24332717
P27708	1889	CAD	PYR1_HUMAN CAD protein OS=Homo sapiens OX=9606 GN=CAD PE=1 SV=3	KVAEPELMGTPDGTC#YPPPPVPR|KVAEPELMGTPDGTC#YPPPPVPR	2|5	1.305|0.12	0.7125	0.83792	7	2	41.6058		SUBCELLULAR LOCATION: Cytoplasm {ECO:0000269|PubMed:15890648}. Nucleus {ECO:0000269|PubMed:15890648}. Note=Cytosolic and unphosphorylated in resting cells, translocates to the nucleus in response to EGF stimulation, nuclear import promotes optimal cell growth.
P27708	1455	CAD	PYR1_HUMAN CAD protein OS=Homo sapiens OX=9606 GN=CAD PE=1 SV=3	VHVDC#MTSQK|VHVDC#MTSQK	1|2	0.44|0.32049	0.38024	0.08451	3	2	27.5488		SUBCELLULAR LOCATION: Cytoplasm {ECO:0000269|PubMed:15890648}. Nucleus {ECO:0000269|PubMed:15890648}. Note=Cytosolic and unphosphorylated in resting cells, translocates to the nucleus in response to EGF stimulation, nuclear import promotes optimal cell growth.
P27708	1682	CAD	PYR1_HUMAN CAD protein OS=Homo sapiens OX=9606 GN=CAD PE=1 SV=3	QDVEALWENMAVIDC#FASDHAPHTLEEK|QDVEALWENMAVIDC#FASDHAPHTLEEK	2|3	0.195|0.49	0.3425	0.2086	5	2	25.5121		SUBCELLULAR LOCATION: Cytoplasm {ECO:0000269|PubMed:15890648}. Nucleus {ECO:0000269|PubMed:15890648}. Note=Cytosolic and unphosphorylated in resting cells, translocates to the nucleus in response to EGF stimulation, nuclear import promotes optimal cell growth.
P27708	1636	CAD	PYR1_HUMAN CAD protein OS=Homo sapiens OX=9606 GN=CAD PE=1 SV=3	GLPVTC#EVAPHHLFLSHDDLER|GLPVTC#EVAPHHLFLSHDDLER	7|5	0.12|0.17	0.145	0.03536	12	2	12.6638		SUBCELLULAR LOCATION: Cytoplasm {ECO:0000269|PubMed:15890648}. Nucleus {ECO:0000269|PubMed:15890648}. Note=Cytosolic and unphosphorylated in resting cells, translocates to the nucleus in response to EGF stimulation, nuclear import promotes optimal cell growth.
P27708	787	CAD	PYR1_HUMAN CAD protein OS=Homo sapiens OX=9606 GN=CAD PE=1 SV=3	MVDENC#VGFDHTVKPVSDMELETPTDKR|MVDENC#VGFDHTVKPVSDMELETPTDKR	2|1	0.00098|0.27	0.13549	0.19023	3	2	11.9323		SUBCELLULAR LOCATION: Cytoplasm {ECO:0000269|PubMed:15890648}. Nucleus {ECO:0000269|PubMed:15890648}. Note=Cytosolic and unphosphorylated in resting cells, translocates to the nucleus in response to EGF stimulation, nuclear import promotes optimal cell growth.
P27708	1374	CAD	PYR1_HUMAN CAD protein OS=Homo sapiens OX=9606 GN=CAD PE=1 SV=3	VTAVDWHFEEAVDGEC#PPQR|VTAVDWHFEEAVDGEC#PPQR	1|1	0.08|0.15	0.115	0.0495	2	2	10.3139		SUBCELLULAR LOCATION: Cytoplasm {ECO:0000269|PubMed:15890648}. Nucleus {ECO:0000269|PubMed:15890648}. Note=Cytosolic and unphosphorylated in resting cells, translocates to the nucleus in response to EGF stimulation, nuclear import promotes optimal cell growth.
P27708	484	CAD	PYR1_HUMAN CAD protein OS=Homo sapiens OX=9606 GN=CAD PE=1 SV=3	NERPDGVLLTFGGQTALNC#GVELTK|NERPDGVLLTFGGQTALNC#GVELTK	3|3	0.08|0.11	0.095	0.02121	6	2	8.6758		SUBCELLULAR LOCATION: Cytoplasm {ECO:0000269|PubMed:15890648}. Nucleus {ECO:0000269|PubMed:15890648}. Note=Cytosolic and unphosphorylated in resting cells, translocates to the nucleus in response to EGF stimulation, nuclear import promotes optimal cell growth.
P27708	1215	CAD	PYR1_HUMAN CAD protein OS=Homo sapiens OX=9606 GN=CAD PE=1 SV=3	VIEC#NVR|VIEC#NVR	1|1	0.04|0.11	0.075	0.0495	2	2	6.97674		SUBCELLULAR LOCATION: Cytoplasm {ECO:0000269|PubMed:15890648}. Nucleus {ECO:0000269|PubMed:15890648}. Note=Cytosolic and unphosphorylated in resting cells, translocates to the nucleus in response to EGF stimulation, nuclear import promotes optimal cell growth.
P27708	280	CAD	PYR1_HUMAN CAD protein OS=Homo sapiens OX=9606 GN=CAD PE=1 SV=3	GHNQPC#LLVGSGR|GHNQPC#LLVGSGR	7|7	0.03|0.03	0.03	0	14	2	2.91262		SUBCELLULAR LOCATION: Cytoplasm {ECO:0000269|PubMed:15890648}. Nucleus {ECO:0000269|PubMed:15890648}. Note=Cytosolic and unphosphorylated in resting cells, translocates to the nucleus in response to EGF stimulation, nuclear import promotes optimal cell growth.
P27708	2092	CAD	PYR1_HUMAN CAD protein OS=Homo sapiens OX=9606 GN=CAD PE=1 SV=3	TVHSLAC#LLTQYR|TVHSLAC#LLTQYR	3|6	0.00098|0.00549	0.00324	0.00319	9	2	0.322954		SUBCELLULAR LOCATION: Cytoplasm {ECO:0000269|PubMed:15890648}. Nucleus {ECO:0000269|PubMed:15890648}. Note=Cytosolic and unphosphorylated in resting cells, translocates to the nucleus in response to EGF stimulation, nuclear import promotes optimal cell growth.
P27708	897	CAD	PYR1_HUMAN CAD protein OS=Homo sapiens OX=9606 GN=CAD PE=1 SV=3	LRQELGIC#PAVK QELGIC#PAVK|QELGIC#PAVK	5|1	0.00098|0.00098	0.00098	0	6	2	0		SUBCELLULAR LOCATION: Cytoplasm {ECO:0000269|PubMed:15890648}. Nucleus {ECO:0000269|PubMed:15890648}. Note=Cytosolic and unphosphorylated in resting cells, translocates to the nucleus in response to EGF stimulation, nuclear import promotes optimal cell growth.
P27708	183	CAD	PYR1_HUMAN CAD protein OS=Homo sapiens OX=9606 GN=CAD PE=1 SV=3	ILALDC#GLK|ILALDC#GLK	1|1	0.00098|0.00098	0.00098	0	2	2	0		SUBCELLULAR LOCATION: Cytoplasm {ECO:0000269|PubMed:15890648}. Nucleus {ECO:0000269|PubMed:15890648}. Note=Cytosolic and unphosphorylated in resting cells, translocates to the nucleus in response to EGF stimulation, nuclear import promotes optimal cell growth.
P27708	736	CAD	PYR1_HUMAN CAD protein OS=Homo sapiens OX=9606 GN=CAD PE=1 SV=3	|NSVTGGTAAFEPSVDYC#VVK	|1	|0.00098	0.00098	NA	1	1	0		SUBCELLULAR LOCATION: Cytoplasm {ECO:0000269|PubMed:15890648}. Nucleus {ECO:0000269|PubMed:15890648}. Note=Cytosolic and unphosphorylated in resting cells, translocates to the nucleus in response to EGF stimulation, nuclear import promotes optimal cell growth.
Q13137	443	CALCOCO2	CACO2_HUMAN Calcium-binding and coiled-coil domain-containing protein 2 OS=Homo sapiens OX=9606 GN=CALCOCO2 PE=1 SV=1	QIFEDHVFC#HSL|QIFEDHVFC#HSL	1|1	0.37|0.06	0.215	0.2192	2	2	17.6955		SUBCELLULAR LOCATION: Cytoplasm, perinuclear region {ECO:0000269|PubMed:12869526, ECO:0000269|PubMed:17635994, ECO:0000269|PubMed:9230084}. Cytoplasm, cytoskeleton {ECO:0000269|PubMed:17635994}. Cytoplasmic vesicle, autophagosome membrane {ECO:0000269|PubMed:25771791}; Peripheral membrane protein {ECO:0000305}. Note=According to PubMed:7540613, localizes to nuclear dots. According to PubMed:92300…
P27797	105	CALR	CALR_HUMAN Calreticulin OS=Homo sapiens OX=9606 GN=CALR PE=1 SV=1	HEQNIDC#GGGYVK|HEQNIDC#GGGYVK	3|1	0.02|0.03	0.025	0.00707	4	2	2.43902	Disulfide bond	SUBCELLULAR LOCATION: Endoplasmic reticulum lumen {ECO:0000269|PubMed:10358038, ECO:0000269|PubMed:11149926}. Cytoplasm, cytosol {ECO:0000269|PubMed:11149926}. Secreted, extracellular space, extracellular matrix {ECO:0000305}. Cell surface {ECO:0000269|PubMed:10358038}. Sarcoplasmic reticulum lumen {ECO:0000250|UniProtKB:P28491}. Note=Also found in cell surface (T cells), cytosol and extracellula…	Ontology_term=ECO:0000269,ECO:0000269;evidence=ECO:0000269|PubMed:11322874,ECO:0000269|PubMed:21423620;Dbxref=PMID:11322874,PMID:21423620
P27797	163	CALR	CALR_HUMAN Calreticulin OS=Homo sapiens OX=9606 GN=CALR PE=1 SV=1	C#KDDEFTHLYTLIVRPDNTYEVK|C#KDDEFTHLYTLIVRPDNTYEVK	3|4	0.47|0.79	0.63	0.22627	7	2	38.6503		SUBCELLULAR LOCATION: Endoplasmic reticulum lumen {ECO:0000269|PubMed:10358038, ECO:0000269|PubMed:11149926}. Cytoplasm, cytosol {ECO:0000269|PubMed:11149926}. Secreted, extracellular space, extracellular matrix {ECO:0000305}. Cell surface {ECO:0000269|PubMed:10358038}. Sarcoplasmic reticulum lumen {ECO:0000250|UniProtKB:P28491}. Note=Also found in cell surface (T cells), cytosol and extracellula…
Q14012	267	CAMK1	KCC1A_HUMAN Calcium/calmodulin-dependent protein kinase type 1 OS=Homo sapiens OX=9606 GN=CAMK1 PE=1 SV=1	|FTC#EQALQHPWIAGDTALDK	|1	|0.96	0.96	NA	1	1	48.9796		SUBCELLULAR LOCATION: Cytoplasm {ECO:0000250}. Nucleus {ECO:0000250}. Note=Predominantly cytoplasmic. {ECO:0000250}.
Q96RR4	223	CAMKK2	KKCC2_HUMAN Calcium/calmodulin-dependent protein kinase kinase 2 OS=Homo sapiens OX=9606 GN=CAMKK2 PE=1 SV=2	|GTRPAPGGC#IQPR	|1	|0.45	0.45	NA	1	1	31.0345		SUBCELLULAR LOCATION: Nucleus {ECO:0000269|PubMed:21957496}. Cytoplasm {ECO:0000269|PubMed:21957496}. Cell projection, neuron projection {ECO:0000269|PubMed:21957496}. Note=Predominantly nuclear in unstimulated cells, relocalizes into cytoplasm and neurites after forskolin induction. {ECO:0000269|PubMed:21957496}.
Q08AD1	512	CAMSAP2	CAMP2_HUMAN Calmodulin-regulated spectrin-associated protein 2 OS=Homo sapiens OX=9606 GN=CAMSAP2 PE=1 SV=3	SC#VPLNTNELNSNENIHYK|SC#VPLNTNELNSNENIHYK	1|1	0.00098|0.17	0.08549	0.11952	2	2	7.87571		SUBCELLULAR LOCATION: Cytoplasm, cytoskeleton {ECO:0000269|PubMed:23169647, ECO:0000269|PubMed:24486153, ECO:0000269|PubMed:24706919, ECO:0000269|PubMed:24908486, ECO:0000269|PubMed:27666745, ECO:0000269|PubMed:28814570}. Golgi apparatus {ECO:0000269|PubMed:27666745}. Note=Associated with the minus-end of microtubules and also detected at the centrosomes (PubMed:23169647, PubMed:24486153, PubMed:…
Q86VP6	1007	CAND1	CAND1_HUMAN Cullin-associated NEDD8-dissociated protein 1 OS=Homo sapiens OX=9606 GN=CAND1 PE=1 SV=2	|NC#IGDFLK	|1	|1.4	1.4	NA	1	1	58.3333		SUBCELLULAR LOCATION: Cytoplasm {ECO:0000269|PubMed:21249194}. Nucleus {ECO:0000269|PubMed:21249194}. Note=Predominantly cytoplasmic.
Q86VP6	92	CAND1	CAND1_HUMAN Cullin-associated NEDD8-dissociated protein 1 OS=Homo sapiens OX=9606 GN=CAND1 PE=1 SV=2	VKEYQVETIVDTLC#TNMLSDKEQLR|VKEYQVETIVDTLC#TNMLSDKEQLR VKEYQVETIVDTLC#TNMLSDK	2|3	0.79|0.2	0.495	0.41719	5	2	33.1104		SUBCELLULAR LOCATION: Cytoplasm {ECO:0000269|PubMed:21249194}. Nucleus {ECO:0000269|PubMed:21249194}. Note=Predominantly cytoplasmic.
Q86VP6	954	CAND1	CAND1_HUMAN Cullin-associated NEDD8-dissociated protein 1 OS=Homo sapiens OX=9606 GN=CAND1 PE=1 SV=2	NVVAEC#LGK|NVVAEC#LGK	1|1	0.15|0.52	0.335	0.26163	2	2	25.0936		SUBCELLULAR LOCATION: Cytoplasm {ECO:0000269|PubMed:21249194}. Nucleus {ECO:0000269|PubMed:21249194}. Note=Predominantly cytoplasmic.
Q86VP6	237	CAND1	CAND1_HUMAN Cullin-associated NEDD8-dissociated protein 1 OS=Homo sapiens OX=9606 GN=CAND1 PE=1 SV=2	TYIQC#IAAISR|TYIQC#IAAISR	1|2	0.11|0.21	0.16	0.07071	3	2	13.7931		SUBCELLULAR LOCATION: Cytoplasm {ECO:0000269|PubMed:21249194}. Nucleus {ECO:0000269|PubMed:21249194}. Note=Predominantly cytoplasmic.
Q86VP6	571	CAND1	CAND1_HUMAN Cullin-associated NEDD8-dissociated protein 1 OS=Homo sapiens OX=9606 GN=CAND1 PE=1 SV=2	DLFTC#TIK|DLFTC#TIK	1|2	0.05|0.26	0.155	0.14849	3	2	13.4199		SUBCELLULAR LOCATION: Cytoplasm {ECO:0000269|PubMed:21249194}. Nucleus {ECO:0000269|PubMed:21249194}. Note=Predominantly cytoplasmic.
Q86VP6	301	CAND1	CAND1_HUMAN Cullin-associated NEDD8-dissociated protein 1 OS=Homo sapiens OX=9606 GN=CAND1 PE=1 SV=2	EVYPHVSTIINIC#LK|EVYPHVSTIINIC#LK	3|1	0.00098|0.09	0.04549	0.06295	4	2	4.35107		SUBCELLULAR LOCATION: Cytoplasm {ECO:0000269|PubMed:21249194}. Nucleus {ECO:0000269|PubMed:21249194}. Note=Predominantly cytoplasmic.
Q86VP6	71	CAND1	CAND1_HUMAN Cullin-associated NEDD8-dissociated protein 1 OS=Homo sapiens OX=9606 GN=CAND1 PE=1 SV=2	C#LGPLVSK|C#LGPLVSK	2|2	0.02742|0.02049	0.02396	0.0049	4	2	2.33994		SUBCELLULAR LOCATION: Cytoplasm {ECO:0000269|PubMed:21249194}. Nucleus {ECO:0000269|PubMed:21249194}. Note=Predominantly cytoplasmic.
Q86VP6	1134	CAND1	CAND1_HUMAN Cullin-associated NEDD8-dissociated protein 1 OS=Homo sapiens OX=9606 GN=CAND1 PE=1 SV=2	LSTLC#PSAVLQR|LSTLC#PSAVLQR	4|3	0.00098|0.00658	0.00378	0.00396	7	2	0.376577		SUBCELLULAR LOCATION: Cytoplasm {ECO:0000269|PubMed:21249194}. Nucleus {ECO:0000269|PubMed:21249194}. Note=Predominantly cytoplasmic.
Q8WVQ1	287	CANT1	CANT1_HUMAN Soluble calcium-activated nucleotidase 1 OS=Homo sapiens OX=9606 GN=CANT1 PE=1 SV=1	|AAAGIQPPGYLIHESAC#WSDTLQR	|1	|0.00098	0.00098	NA	1	1	0	Mutagenesis	SUBCELLULAR LOCATION: Endoplasmic reticulum membrane {ECO:0000269|PubMed:12234496}; Single-pass type II membrane protein {ECO:0000269|PubMed:12234496}. Golgi apparatus, Golgi stack membrane {ECO:0000269|PubMed:12234496}; Single-pass type II membrane protein {ECO:0000269|PubMed:12234496}. Cell membrane {ECO:0000269|PubMed:16835225}. Note=Processed form: Secreted.	Note=Reduces GDPase and ADPase activities 1.3-fold. C->S;Ontology_term=ECO:0000269;evidence=ECO:0000269|PubMed:16835225;Dbxref=PMID:16835225
Q01518	416	CAP1	CAP1_HUMAN Adenylyl cyclase-associated protein 1 OS=Homo sapiens OX=9606 GN=CAP1 PE=1 SV=5	TDGC#HAYLSK|TDGC#HAYLSK	3|3	1.05|0.29	0.67	0.5374	6	2	40.1198		SUBCELLULAR LOCATION: Cell membrane {ECO:0000250}; Peripheral membrane protein {ECO:0000250}.
Q01518	93	CAP1	CAP1_HUMAN Adenylyl cyclase-associated protein 1 OS=Homo sapiens OX=9606 GN=CAP1 PE=1 SV=5	ALLVTASQC#QQPAENK|ALLVTASQC#QQPAENK	1|1	0.03|0.2	0.115	0.12021	2	2	10.3139		SUBCELLULAR LOCATION: Cell membrane {ECO:0000250}; Peripheral membrane protein {ECO:0000250}.
Q01518	427	CAP1	CAP1_HUMAN Adenylyl cyclase-associated protein 1 OS=Homo sapiens OX=9606 GN=CAP1 PE=1 SV=5	NSLDC#EIVSAK|NSLDC#EIVSAK	1|2	0.04|0.085	0.0625	0.03182	3	2	5.88235		SUBCELLULAR LOCATION: Cell membrane {ECO:0000250}; Peripheral membrane protein {ECO:0000250}.
Q01518	356	CAP1	CAP1_HUMAN Adenylyl cyclase-associated protein 1 OS=Homo sapiens OX=9606 GN=CAP1 PE=1 SV=5	C#VNTTLQIK|C#VNTTLQIK	2|3	0.05738|0.03	0.04369	0.01936	5	2	4.18611		SUBCELLULAR LOCATION: Cell membrane {ECO:0000250}; Peripheral membrane protein {ECO:0000250}.
Q01518	375	CAP1	CAP1_HUMAN Adenylyl cyclase-associated protein 1 OS=Homo sapiens OX=9606 GN=CAP1 PE=1 SV=5	|INSITVDNC#K	|1	|0.04	0.04	NA	1	1	3.84615		SUBCELLULAR LOCATION: Cell membrane {ECO:0000250}; Peripheral membrane protein {ECO:0000250}.
P40123	32	CAP2	CAP2_HUMAN Adenylyl cyclase-associated protein 2 OS=Homo sapiens OX=9606 GN=CAP2 PE=1 SV=1	LESLSAESHRPPGNC#GEVNGVIAGVAPSVEAFDK|	1|	1.48|	1.48	NA	1	1	59.6774		SUBCELLULAR LOCATION: Cell membrane {ECO:0000250}; Peripheral membrane protein {ECO:0000250}.
P40121	77	CAPG	CAPG_HUMAN Macrophage-capping protein OS=Homo sapiens OX=9606 GN=CAPG PE=1 SV=2	DEQGAC#AVLAVHLNTLLGERPVQHR|DEQGAC#AVLAVHLNTLLGERPVQHR	1|1	0.00098|0.52	0.26049	0.367	2	2	20.6658		SUBCELLULAR LOCATION: Nucleus {ECO:0000269|PubMed:17081065, ECO:0000269|PubMed:18266911}. Cytoplasm {ECO:0000269|PubMed:17081065}. Melanosome {ECO:0000269|PubMed:17081065}. Cell projection, lamellipodium {ECO:0000250|UniProtKB:P24452}. Cell projection, ruffle {ECO:0000250|UniProtKB:P24452}. Note=In macrophages, may be predominantly cytoplasmic. Nuclear localization was observed in fibroblasts. In…
P07384	590	CAPN1	CAN1_HUMAN Calpain-1 catalytic subunit OS=Homo sapiens OX=9606 GN=CAPN1 PE=1 SV=1	GFSLESC#R|GFSLESC#R	3|3	0.48|1.29	0.885	0.57276	6	2	46.9496		SUBCELLULAR LOCATION: Cytoplasm {ECO:0000269|PubMed:21531719, ECO:0000269|PubMed:8769305}. Cell membrane {ECO:0000269|PubMed:8769305}. Note=Translocates to the plasma membrane upon Ca(2+) binding. In granular keratinocytes and in lower corneocytes, colocalizes with FLG and FLG2 (PubMed:21531719). {ECO:0000269|PubMed:21531719}.
P07384	49	CAPN1	CAN1_HUMAN Calpain-1 catalytic subunit OS=Homo sapiens OX=9606 GN=CAPN1 PE=1 SV=1	C#LQSGTLFR|C#LQSGTLFR	4|3	0.095|0.04	0.0675	0.03889	7	2	6.32319		SUBCELLULAR LOCATION: Cytoplasm {ECO:0000269|PubMed:21531719, ECO:0000269|PubMed:8769305}. Cell membrane {ECO:0000269|PubMed:8769305}. Note=Translocates to the plasma membrane upon Ca(2+) binding. In granular keratinocytes and in lower corneocytes, colocalizes with FLG and FLG2 (PubMed:21531719). {ECO:0000269|PubMed:21531719}.
P07384	417	CAPN1	CAN1_HUMAN Calpain-1 catalytic subunit OS=Homo sapiens OX=9606 GN=CAPN1 PE=1 SV=1	ESGC#SFVLALMQK|	1|	0.00098|	0.00098	NA	1	1	0		SUBCELLULAR LOCATION: Cytoplasm {ECO:0000269|PubMed:21531719, ECO:0000269|PubMed:8769305}. Cell membrane {ECO:0000269|PubMed:8769305}. Note=Translocates to the plasma membrane upon Ca(2+) binding. In granular keratinocytes and in lower corneocytes, colocalizes with FLG and FLG2 (PubMed:21531719). {ECO:0000269|PubMed:21531719}.
P17655	577	CAPN2	CAN2_HUMAN Calpain-2 catalytic subunit OS=Homo sapiens OX=9606 GN=CAPN2 PE=1 SV=6	SDGFSIETC#K|SDGFSIETC#K	1|1	0.34|0.8	0.57	0.32527	2	2	36.3057		SUBCELLULAR LOCATION: Cytoplasm. Cell membrane. Note=Translocates to the plasma membrane upon Ca(2+) binding.
P17655	240	CAPN2	CAN2_HUMAN Calpain-2 catalytic subunit OS=Homo sapiens OX=9606 GN=CAPN2 PE=1 SV=6	GSLLGC#SIDITSAADSEAITFQK|GSLLGC#SIDITSAADSEAITFQK	2|2	0.655|0.48	0.5675	0.12374	4	2	36.2041		SUBCELLULAR LOCATION: Cytoplasm. Cell membrane. Note=Translocates to the plasma membrane upon Ca(2+) binding.
P17655	498	CAPN2	CAN2_HUMAN Calpain-2 catalytic subunit OS=Homo sapiens OX=9606 GN=CAPN2 PE=1 SV=6	FKLPPGEYILVPSTFEPNKDGDFC#IR LPPGEYILVPSTFEPNKDGDFC#IR|FKLPPGEYILVPSTFEPNKDGDFC#IR LPPGEYILVPSTFEPNKDGDFC#IR	8|6	0.265|0.245	0.255	0.01414	14	2	20.3187		SUBCELLULAR LOCATION: Cytoplasm. Cell membrane. Note=Translocates to the plasma membrane upon Ca(2+) binding.
P17655	341	CAPN2	CAN2_HUMAN Calpain-2 catalytic subunit OS=Homo sapiens OX=9606 GN=CAPN2 PE=1 SV=6	LEIC#NLTPDTLTSDTYKK|LEIC#NLTPDTLTSDTYKK	4|6	0.09|0.065	0.0775	0.01768	10	2	7.19258		SUBCELLULAR LOCATION: Cytoplasm. Cell membrane. Note=Translocates to the plasma membrane upon Ca(2+) binding.
P17655	640	CAPN2	CAN2_HUMAN Calpain-2 catalytic subunit OS=Homo sapiens OX=9606 GN=CAPN2 PE=1 SV=6	MPC#QLHQVIVAR|MPC#QLHQVIVAR	12|14	0.045|0.04	0.0425	0.00354	26	2	4.07674		SUBCELLULAR LOCATION: Cytoplasm. Cell membrane. Note=Translocates to the plasma membrane upon Ca(2+) binding.
P17655	82	CAPN2	CAN2_HUMAN Calpain-2 catalytic subunit OS=Homo sapiens OX=9606 GN=CAPN2 PE=1 SV=6	RPTEIC#ADPQFIIGGATR|RPTEIC#ADPQFIIGGATR	6|6	0.00817|0.01	0.00908	0.00129	12	2	0.89983		SUBCELLULAR LOCATION: Cytoplasm. Cell membrane. Note=Translocates to the plasma membrane upon Ca(2+) binding.
Q9Y6W3	704	CAPN7	CAN7_HUMAN Calpain-7 OS=Homo sapiens OX=9606 GN=CAPN7 PE=1 SV=1	WSGQSAGGC#GNFQETHK|WSGQSAGGC#GNFQETHK	3|2	0.11|0.13549	0.12274	0.01802	5	2	10.9322		SUBCELLULAR LOCATION: Nucleus.
P04632	190	CAPNS1	CPNS1_HUMAN Calpain small subunit 1 OS=Homo sapiens OX=9606 GN=CAPNS1 PE=1 SV=1	SGTIC#SSELPGAFEAAGFHLNEHLYNMIIR|SGTIC#SSELPGAFEAAGFHLNEHLYNMIIR	3|2	0.45|0.64	0.545	0.13435	5	2	35.2751		SUBCELLULAR LOCATION: Cytoplasm {ECO:0000250}. Cell membrane {ECO:0000250}. Note=Translocates to the plasma membrane upon calcium binding. {ECO:0000250}.
P04632	144	CAPNS1	CPNS1_HUMAN Calpain small subunit 1 OS=Homo sapiens OX=9606 GN=CAPNS1 PE=1 SV=1	TDGFGIDTC#R|TDGFGIDTC#R	2|3	0.05|0.02	0.035	0.02121	5	2	3.38164		SUBCELLULAR LOCATION: Cytoplasm {ECO:0000250}. Cell membrane {ECO:0000250}. Note=Translocates to the plasma membrane upon calcium binding. {ECO:0000250}.
P52907	157	CAPZA1	CAZA1_HUMAN F-actin-capping protein subunit alpha-1 OS=Homo sapiens OX=9606 GN=CAPZA1 PE=1 SV=3	TIDGQQTIIAC#IESHQFQPK|TIDGQQTIIAC#IESHQFQPK	4|2	0.255|0.24549	0.25024	0.00672	6	2	20.0154		SUBCELLULAR LOCATION: Cytoplasm, cytoskeleton {ECO:0000250}.
P52907	141	CAPZA1	CAZA1_HUMAN F-actin-capping protein subunit alpha-1 OS=Homo sapiens OX=9606 GN=CAPZA1 PE=1 SV=3	DHYSNGFC#TVYAK|DHYSNGFC#TVYAK	3|4	0.13|0.00549	0.06774	0.08804	7	2	6.34424		SUBCELLULAR LOCATION: Cytoplasm, cytoskeleton {ECO:0000250}.
P47755	141	CAPZA2	CAZA2_HUMAN F-actin-capping protein subunit alpha-2 OS=Homo sapiens OX=9606 GN=CAPZA2 PE=1 SV=3	EHYPNGVC#TVYGK|EHYPNGVC#TVYGK	7|6	0.66|0.135	0.3975	0.37123	13	2	28.4436
P47755	157	CAPZA2	CAZA2_HUMAN F-actin-capping protein subunit alpha-2 OS=Homo sapiens OX=9606 GN=CAPZA2 PE=1 SV=3	KIDGQQTIIAC#IESHQFQAK IDGQQTIIAC#IESHQFQAK|KIDGQQTIIAC#IESHQFQAK IDGQQTIIAC#IESHQFQAK	4|5	0.14|0.24	0.19	0.07071	9	2	15.9664
P47755	111	CAPZA2	CAZA2_HUMAN F-actin-capping protein subunit alpha-2 OS=Homo sapiens OX=9606 GN=CAPZA2 PE=1 SV=3	EATDPRPC#EVENAVESWR|	3|	0.19|	0.19	NA	3	1	15.9664
P47756	206	CAPZB	CAPZB_HUMAN F-actin-capping protein subunit beta OS=Homo sapiens OX=9606 GN=CAPZB PE=1 SV=4	QMEKDETVSDC#SPHIANIGR|QMEKDETVSDC#SPHIANIGR	5|4	0.15|0.35	0.25	0.14142	9	2	20		SUBCELLULAR LOCATION: Cytoplasm, cytoskeleton {ECO:0000250}. Cytoplasm, myofibril, sarcomere {ECO:0000250}.
P47756	62	CAPZB	CAPZB_HUMAN F-actin-capping protein subunit beta OS=Homo sapiens OX=9606 GN=CAPZB PE=1 SV=4	DYLLC#DYNR|DYLLC#DYNR	4|2	0.04|0.185	0.1125	0.10253	6	2	10.1124		SUBCELLULAR LOCATION: Cytoplasm, cytoskeleton {ECO:0000250}. Cytoplasm, myofibril, sarcomere {ECO:0000250}.
P47756	147	CAPZB	CAPZB_HUMAN F-actin-capping protein subunit beta OS=Homo sapiens OX=9606 GN=CAPZB PE=1 SV=4	GC#WDSIHVVEVQEK|GC#WDSIHVVEVQEK	4|4	0.1|0.08	0.09	0.01414	8	2	8.25688		SUBCELLULAR LOCATION: Cytoplasm, cytoskeleton {ECO:0000250}. Cytoplasm, myofibril, sarcomere {ECO:0000250}.
Q9Y2V2	112	CARHSP1	CHSP1_HUMAN Calcium-regulated heat-stable protein 1 OS=Homo sapiens OX=9606 GN=CARHSP1 PE=1 SV=2	|MC#SIPPK	|1	|0.55	0.55	NA	1	1	35.4839		SUBCELLULAR LOCATION: Cytoplasm {ECO:0000269|PubMed:21177848}. Cytoplasm, P-body {ECO:0000269|PubMed:21177848}. Cytoplasmic granule {ECO:0000269|PubMed:21177848}. Note=Detected at cytoplasmic stress granules and P-bodies. Detected at exosome granules where mRNA is degraded (By similarity). {ECO:0000250}.
Q86X55	438	CARM1	CARM1_HUMAN Histone-arginine methyltransferase CARM1 OS=Homo sapiens OX=9606 GN=CARM1 PE=1 SV=3	AGDTLSGTC#LLIANKR|AGDTLSGTC#LLIANKR	1|2	1.38|0.36	0.87	0.72125	3	2	46.5241		SUBCELLULAR LOCATION: Nucleus. Cytoplasm. Note=Mainly nuclear during the G1, S and G2 phases of the cell cycle. Cytoplasmic during mitosis, after breakup of the nuclear membrane.
Q86X55	78	CARM1	CARM1_HUMAN Histone-arginine methyltransferase CARM1 OS=Homo sapiens OX=9606 GN=CARM1 PE=1 SV=3	AGPDSAGIALYSHEDVC#VFK|AGPDSAGIALYSHEDVC#VFK	2|3	0.1|0.00098	0.05049	0.07002	5	2	4.80633		SUBCELLULAR LOCATION: Nucleus. Cytoplasm. Note=Mainly nuclear during the G1, S and G2 phases of the cell cycle. Cytoplasmic during mitosis, after breakup of the nuclear membrane.
P49589	335	CARS	SYCC_HUMAN Cysteine--tRNA ligase, cytoplasmic OS=Homo sapiens OX=9606 GN=CARS PE=1 SV=3	ASKPGEPSWPC#PWGK|ASKPGEPSWPC#PWGK	12|8	0.485|0.23	0.3575	0.18031	20	2	26.3352		SUBCELLULAR LOCATION: Cytoplasm.
P49589	27	CARS	SYCC_HUMAN Cysteine--tRNA ligase, cytoplasmic OS=Homo sapiens OX=9606 GN=CARS PE=1 SV=3	VQPQWSPPAGTQPC#R|VQPQWSPPAGTQPC#R	3|4	0.06|0.31	0.185	0.17678	7	2	15.6118		SUBCELLULAR LOCATION: Cytoplasm.
P49589	182	CARS	SYCC_HUMAN Cysteine--tRNA ligase, cytoplasmic OS=Homo sapiens OX=9606 GN=CARS PE=1 SV=3	LTGEEVNSC#VEVLLEEAK|LTGEEVNSC#VEVLLEEAK	1|1	0.00098|0.00098	0.00098	0	2	2	0		SUBCELLULAR LOCATION: Cytoplasm.
P49589	389	CARS	SYCC_HUMAN Cysteine--tRNA ligase, cytoplasmic OS=Homo sapiens OX=9606 GN=CARS PE=1 SV=3	|FPHHDNELAQSEAYFENDC#WVR	|1	|0.00098	0.00098	NA	1	1	0		SUBCELLULAR LOCATION: Cytoplasm.
O14936	684	CASK	CSKP_HUMAN Peripheral plasma membrane protein CASK OS=Homo sapiens OX=9606 GN=CASK PE=1 SV=3	VAC#IAMEK|VAC#IAMEK	1|2	1.08|0.675	0.8775	0.28638	3	2	46.7377		SUBCELLULAR LOCATION: Nucleus {ECO:0000250|UniProtKB:Q62915}. Cytoplasm {ECO:0000250|UniProtKB:Q62915}. Cell membrane {ECO:0000250|UniProtKB:Q62915}; Peripheral membrane protein {ECO:0000250|UniProtKB:Q62915}.
O14936	513	CASK	CSKP_HUMAN Peripheral plasma membrane protein CASK OS=Homo sapiens OX=9606 GN=CASK PE=1 SV=3	MNELNHC#IVAR|MNELNHC#IVAR	4|2	0.08|0.01549	0.04775	0.04562	6	2	4.55738		SUBCELLULAR LOCATION: Nucleus {ECO:0000250|UniProtKB:Q62915}. Cytoplasm {ECO:0000250|UniProtKB:Q62915}. Cell membrane {ECO:0000250|UniProtKB:Q62915}; Peripheral membrane protein {ECO:0000250|UniProtKB:Q62915}.
O14936	146	CASK	CSKP_HUMAN Peripheral plasma membrane protein CASK OS=Homo sapiens OX=9606 GN=CASK PE=1 SV=3	DVKPHC#VLLASK|DVKPHC#VLLASK	3|3	0.00098|0.00098	0.00098	0	6	2	0		SUBCELLULAR LOCATION: Nucleus {ECO:0000250|UniProtKB:Q62915}. Cytoplasm {ECO:0000250|UniProtKB:Q62915}. Cell membrane {ECO:0000250|UniProtKB:Q62915}; Peripheral membrane protein {ECO:0000250|UniProtKB:Q62915}.
P42574	264	CASP3	CASP3_HUMAN Caspase-3 OS=Homo sapiens OX=9606 GN=CASP3 PE=1 SV=2	QIPC#IVSMLTK|QIPC#IVSMLTK	1|1	0.08|0.43	0.255	0.24749	2	2	20.3187		SUBCELLULAR LOCATION: Cytoplasm.
P49662	109	CASP4	CASP4_HUMAN Caspase-4 OS=Homo sapiens OX=9606 GN=CASP4 PE=1 SV=1	LC#PHEEFLR|LC#PHEEFLR	1|1	0.18|1.08	0.63	0.6364	2	2	38.6503		SUBCELLULAR LOCATION: Cytoplasm, cytosol {ECO:0000269|PubMed:23661706}. Endoplasmic reticulum membrane {ECO:0000269|PubMed:15123740, ECO:0000269|PubMed:23661706}; Peripheral membrane protein {ECO:0000269|PubMed:23661706}; Cytoplasmic side {ECO:0000269|PubMed:23661706}. Mitochondrion {ECO:0000269|PubMed:15123740, ECO:0000269|PubMed:23661706}. Inflammasome {ECO:0000269|PubMed:25119034, ECO:0000269|…
P55212	277	CASP6	CASP6_HUMAN Caspase-6 OS=Homo sapiens OX=9606 GN=CASP6 PE=1 SV=2	QVPC#FASMLTK|QVPC#FASMLTK	1|2	0.43|0.07	0.25	0.25456	3	2	20		SUBCELLULAR LOCATION: Cytoplasm.
P55210	186	CASP7	CASP7_HUMAN Caspase-7 OS=Homo sapiens OX=9606 GN=CASP7 PE=1 SV=1	LFFIQAC#R|LFFIQAC#R	3|1	0.04|0.15	0.095	0.07778	4	2	8.6758	Active site$Mutagenesis	SUBCELLULAR LOCATION: Cytoplasm.	.$Note=No apoptotic activity. C->A
P55210	290	CASP7	CASP7_HUMAN Caspase-7 OS=Homo sapiens OX=9606 GN=CASP7 PE=1 SV=1	QIPC#VVSMLTK|QIPC#VVSMLTK	2|1	0.15|0.2	0.175	0.03536	3	2	14.8936		SUBCELLULAR LOCATION: Cytoplasm.
P20810	413	CAST	ICAL_HUMAN Calpastatin OS=Homo sapiens OX=9606 GN=CAST PE=1 SV=4	TSMC#SIQSAPPEPATLK|TSMC#SIQSAPPEPATLK	5|4	0.24|0.01549	0.12774	0.15875	9	2	11.3271
P20810	408	CAST	ICAL_HUMAN Calpastatin OS=Homo sapiens OX=9606 GN=CAST PE=1 SV=4	AAAPAPVSEAVC#R|AAAPAPVSEAVC#R	4|3	0.035|0.22	0.1275	0.13081	7	2	11.3082
P20810	241	CAST	ICAL_HUMAN Calpastatin OS=Homo sapiens OX=9606 GN=CAST PE=1 SV=4	KEGITGPPADSSKPIGPDDAIDALSSDFTC#GSPTAAGK|KEGITGPPADSSKPIGPDDAIDALSSDFTC#GSPTAAGK	3|2	0.00098|0.21	0.10549	0.1478	5	2	9.54237
P04040	377	CAT	CATA_HUMAN Catalase OS=Homo sapiens OX=9606 GN=CAT PE=1 SV=3	LGPNYLHIPVNC#PYR|LGPNYLHIPVNC#PYR	3|4	0.2|0.36	0.28	0.11314	7	2	21.875		SUBCELLULAR LOCATION: Peroxisome.
P04040	232	CAT	CATA_HUMAN Catalase OS=Homo sapiens OX=9606 GN=CAT PE=1 SV=3	LVNANGEAVYC#K|	1|	0.08|	0.08	NA	1	1	7.40741		SUBCELLULAR LOCATION: Peroxisome.
P04040	460	CAT	CATA_HUMAN Catalase OS=Homo sapiens OX=9606 GN=CAT PE=1 SV=3	LC#ENIAGHLK|LC#ENIAGHLK	2|3	0.025|0.1	0.0625	0.05303	5	2	5.88235		SUBCELLULAR LOCATION: Peroxisome.
Q03135	156	CAV1	CAV1_HUMAN Caveolin-1 OS=Homo sapiens OX=9606 GN=CAV1 PE=1 SV=4	VYSIYVHTVC#DPLFEAVGK|VYSIYVHTVC#DPLFEAVGK	2|2	0.31|0.695	0.5025	0.27224	4	2	33.4443		SUBCELLULAR LOCATION: Golgi apparatus membrane; Peripheral membrane protein. Cell membrane; Peripheral membrane protein. Membrane, caveola {ECO:0000269|PubMed:19262564, ECO:0000269|PubMed:25588833}; Peripheral membrane protein. Membrane raft {ECO:0000269|PubMed:25893292}. Golgi apparatus, trans-Golgi network {ECO:0000250|UniProtKB:P33724}. Note=Colocalized with DPP4 in membrane rafts. Potential h…
Q13951	48	CBFB	PEBB_HUMAN Core-binding factor subunit beta OS=Homo sapiens OX=9606 GN=CBFB PE=1 SV=2	|FQNAC#R	|2	|0.35	0.35	NA	2	1	25.9259		SUBCELLULAR LOCATION: Nucleus {ECO:0000305}.
P22681	353	CBL	CBL_HUMAN E3 ubiquitin-protein ligase CBL OS=Homo sapiens OX=9606 GN=CBL PE=1 SV=2	NQNPDLTGLC#EPTPQDHIK|	1|	0.69|	0.69	NA	1	1	40.8284		SUBCELLULAR LOCATION: Cytoplasm. Cell membrane. Cell projection, cilium {ECO:0000269|PubMed:29237719}. Golgi apparatus {ECO:0000269|PubMed:29237719}. Note=Colocalizes with FGFR2 in lipid rafts at the cell membrane.
P22681	508	CBL	CBL_HUMAN E3 ubiquitin-protein ligase CBL OS=Homo sapiens OX=9606 GN=CBL PE=1 SV=2	VC#VPSSASALGTASK|VC#VPSSASALGTASK	1|1	0.00098|0.07	0.03549	0.0488	2	2	3.42736		SUBCELLULAR LOCATION: Cytoplasm. Cell membrane. Cell projection, cilium {ECO:0000269|PubMed:29237719}. Golgi apparatus {ECO:0000269|PubMed:29237719}. Note=Colocalizes with FGFR2 in lipid rafts at the cell membrane.
P16152	150	CBR1	CBR1_HUMAN Carbonyl reductase [NADPH] 1 OS=Homo sapiens OX=9606 GN=CBR1 PE=1 SV=3	SC#SPELQQK|SC#SPELQQK	1|2	0.18|0.11	0.145	0.0495	3	2	12.6638		SUBCELLULAR LOCATION: Cytoplasm.
P16152	122	CBR1	CBR1_HUMAN Carbonyl reductase [NADPH] 1 OS=Homo sapiens OX=9606 GN=CBR1 PE=1 SV=3	DVC#TELLPLIKPQGR|DVC#TELLPLIKPQGR	7|6	0.01|0.01375	0.01188	0.00265	13	2	1.17405		SUBCELLULAR LOCATION: Cytoplasm.
O75828	143	CBR3	CBR3_HUMAN Carbonyl reductase [NADPH] 3 OS=Homo sapiens OX=9606 GN=CBR3 PE=1 SV=3	VVNISSLQC#LR|	1|	0.00098|	0.00098	NA	1	1	0		SUBCELLULAR LOCATION: Cytoplasm {ECO:0000269|PubMed:18493841}.
Q8N4T8	115	CBR4	CBR4_HUMAN Carbonyl reductase family member 4 OS=Homo sapiens OX=9606 GN=CBR4 PE=1 SV=3	TEDMVSQLHTNLLGSMLTC#K|TEDMVSQLHTNLLGSMLTC#K	1|2	0.82|2.235	1.5275	1.00056	3	2	60.4352		SUBCELLULAR LOCATION: Mitochondrion matrix {ECO:0000269|PubMed:19000905, ECO:0000269|PubMed:19571038}.
Q8N4T8	55	CBR4	CBR4_HUMAN Carbonyl reductase family member 4 OS=Homo sapiens OX=9606 GN=CBR4 PE=1 SV=3	AAAGDLGGDHLAFSC#DVAK|AAAGDLGGDHLAFSC#DVAK	2|2	1.805|1.06	1.4325	0.52679	4	2	58.89		SUBCELLULAR LOCATION: Mitochondrion matrix {ECO:0000269|PubMed:19000905, ECO:0000269|PubMed:19571038}.
P35520	15	CBS	CBS_HUMAN Cystathionine beta-synthase OS=Homo sapiens OX=9606 GN=CBS PE=1 SV=2	PSETPQAEVGPTGC#PHR|PSETPQAEVGPTGC#PHR	5|7	0.02|0.04	0.03	0.01414	12	2	2.91262		SUBCELLULAR LOCATION: Cytoplasm {ECO:0000269|PubMed:17087506, ECO:0000269|PubMed:23981774}. Nucleus {ECO:0000269|PubMed:17087506}.
P83916	156	CBX1	CBX1_HUMAN Chromobox protein homolog 1 OS=Homo sapiens OX=9606 GN=CBX1 PE=1 SV=1	C#PQVVISFYEER|	1|	0.22|	0.22	NA	1	1	18.0328		SUBCELLULAR LOCATION: Nucleus {ECO:0000269|PubMed:10460410, ECO:0000269|PubMed:9169582}. Note=Unassociated with chromosomes during mitosis.
Q13185	177	CBX3	CBX3_HUMAN Chromobox protein homolog 3 OS=Homo sapiens OX=9606 GN=CBX3 PE=1 SV=4	LTWHSC#PEDEAQ|LTWHSC#PEDEAQ	1|1	1.01|0.06	0.535	0.67175	2	2	34.8534		SUBCELLULAR LOCATION: Nucleus {ECO:0000305}. Note=Associates with euchromatin and is largely excluded from constitutive heterochromatin. May be associated with microtubules and mitotic poles during mitosis (Potential). {ECO:0000305}.
P45973	133	CBX5	CBX5_HUMAN Chromobox protein homolog 5 OS=Homo sapiens OX=9606 GN=CBX5 PE=1 SV=1	IIGATDSC#GDLMFLMK|IIGATDSC#GDLMFLMK	3|2	0.33|0.295	0.3125	0.02475	5	2	23.8095		SUBCELLULAR LOCATION: Nucleus {ECO:0000269|PubMed:10460410, ECO:0000269|PubMed:19617346}. Chromosome {ECO:0000269|PubMed:10460410}. Chromosome, centromere {ECO:0000269|PubMed:10460410, ECO:0000269|PubMed:21346195}. Note=Colocalizes with HNRNPU in the nucleus (PubMed:19617346). Component of centromeric and pericentromeric heterochromatin. Associates with chromosomes during mitosis. Associates spec…
P45973	59	CBX5	CBX5_HUMAN Chromobox protein homolog 5 OS=Homo sapiens OX=9606 GN=CBX5 PE=1 SV=1	|NLDC#PELISEFMK	|1	|0.00098	0.00098	NA	1	1	0		SUBCELLULAR LOCATION: Nucleus {ECO:0000269|PubMed:10460410, ECO:0000269|PubMed:19617346}. Chromosome {ECO:0000269|PubMed:10460410}. Chromosome, centromere {ECO:0000269|PubMed:10460410, ECO:0000269|PubMed:21346195}. Note=Colocalizes with HNRNPU in the nucleus (PubMed:19617346). Component of centromeric and pericentromeric heterochromatin. Associates with chromosomes during mitosis. Associates spec…
Q9HC52	261	CBX8	CBX8_HUMAN Chromobox protein homolog 8 OS=Homo sapiens OX=9606 GN=CBX8 PE=1 SV=3	RQDSDLVQC#GVTSPSSAEATGK|RQDSDLVQC#GVTSPSSAEATGK	1|1	0.96|2.34	1.65	0.97581	2	2	62.2642		SUBCELLULAR LOCATION: Nucleus {ECO:0000269|PubMed:21282530}.
Q9HC52	142	CBX8	CBX8_HUMAN Chromobox protein homolog 8 OS=Homo sapiens OX=9606 GN=CBX8 PE=1 SV=3	NMGLSPPASSTSTSSTC#R|	3|	0.32|	0.32	NA	3	1	24.2424		SUBCELLULAR LOCATION: Nucleus {ECO:0000269|PubMed:21282530}.
Q8IX12	974	CCAR1	CCAR1_HUMAN Cell division cycle and apoptosis regulator protein 1 OS=Homo sapiens OX=9606 GN=CCAR1 PE=1 SV=2	|ESC#FYR	|1	|0.03	0.03	NA	1	1	2.91262		SUBCELLULAR LOCATION: Cytoplasm, perinuclear region {ECO:0000269|PubMed:12816952}.
Q8N163	238	CCAR2	CCAR2_HUMAN Cell cycle and apoptosis regulator protein 2 OS=Homo sapiens OX=9606 GN=CCAR2 PE=1 SV=2	VHLTPYTVDSPIC#DFLELQR|VHLTPYTVDSPIC#DFLELQR	2|1	0.72049|1.97	1.34525	0.88354	3	2	57.3606		SUBCELLULAR LOCATION: Nucleus {ECO:0000269|PubMed:20074560, ECO:0000269|PubMed:20160719, ECO:0000269|PubMed:23352644, ECO:0000269|PubMed:24824780, ECO:0000269|PubMed:24962073, ECO:0000269|PubMed:25661920}. Cytoplasm {ECO:0000269|PubMed:20160719, ECO:0000269|PubMed:24824780}. Note=Recruited to chromatin, post-UV irradiation. Sequestered to the cytoplasm in the presence of MCC. Translocated to the …
Q8N163	754	CCAR2	CCAR2_HUMAN Cell cycle and apoptosis regulator protein 2 OS=Homo sapiens OX=9606 GN=CCAR2 PE=1 SV=2	VVTQNIC#QYR|VVTQNIC#QYR	5|2	0.02|0.125	0.0725	0.07425	7	2	6.75991		SUBCELLULAR LOCATION: Nucleus {ECO:0000269|PubMed:20074560, ECO:0000269|PubMed:20160719, ECO:0000269|PubMed:23352644, ECO:0000269|PubMed:24824780, ECO:0000269|PubMed:24962073, ECO:0000269|PubMed:25661920}. Cytoplasm {ECO:0000269|PubMed:20160719, ECO:0000269|PubMed:24824780}. Note=Recruited to chromatin, post-UV irradiation. Sequestered to the cytoplasm in the presence of MCC. Translocated to the …
Q8N163	515	CCAR2	CCAR2_HUMAN Cell cycle and apoptosis regulator protein 2 OS=Homo sapiens OX=9606 GN=CCAR2 PE=1 SV=2	PGC#VNLSLHGIVEDR|PGC#VNLSLHGIVEDR	6|5	0.02|0.00486	0.01243	0.01071	11	2	1.22774		SUBCELLULAR LOCATION: Nucleus {ECO:0000269|PubMed:20074560, ECO:0000269|PubMed:20160719, ECO:0000269|PubMed:23352644, ECO:0000269|PubMed:24824780, ECO:0000269|PubMed:24962073, ECO:0000269|PubMed:25661920}. Cytoplasm {ECO:0000269|PubMed:20160719, ECO:0000269|PubMed:24824780}. Note=Recruited to chromatin, post-UV irradiation. Sequestered to the cytoplasm in the presence of MCC. Translocated to the …
O60826	215	CCDC22	CCD22_HUMAN Coiled-coil domain-containing protein 22 OS=Homo sapiens OX=9606 GN=CCDC22 PE=1 SV=1	VASLLEHHALQLC#QQTGR|VASLLEHHALQLC#QQTGR	1|1	0.12|0.09	0.105	0.02121	2	2	9.50226		SUBCELLULAR LOCATION: Endosome {ECO:0000305|PubMed:28892079}.
O60826	567	CCDC22	CCD22_HUMAN Coiled-coil domain-containing protein 22 OS=Homo sapiens OX=9606 GN=CCDC22 PE=1 SV=1	YLAALHENC#SQLIQTIEDTGTIMR|	1|	0.00098|	0.00098	NA	1	1	0		SUBCELLULAR LOCATION: Endosome {ECO:0000305|PubMed:28892079}.
Q86WR0	71	CCDC25	CCD25_HUMAN Coiled-coil domain-containing protein 25 OS=Homo sapiens OX=9606 GN=CCDC25 PE=1 SV=2	EVLMDC#AHLVK|EVLMDC#AHLVK	9|8	0.11|0.21	0.16	0.07071	17	2	13.7931
Q96A33	209	CCDC47	CCD47_HUMAN Coiled-coil domain-containing protein 47 OS=Homo sapiens OX=9606 GN=CCDC47 PE=1 SV=1	LNQENEHIYNLWC#SGR|LNQENEHIYNLWC#SGR	2|3	0.05049|0.02	0.03524	0.02156	5	2	3.40404		SUBCELLULAR LOCATION: Endoplasmic reticulum membrane {ECO:0000269|PubMed:30401460}. Rough endoplasmic reticulum membrane {ECO:0000250|UniProtKB:Q9D024}.
Q96A33	283	CCDC47	CCD47_HUMAN Coiled-coil domain-containing protein 47 OS=Homo sapiens OX=9606 GN=CCDC47 PE=1 SV=1	EMQDLSEFC#SDKPK|EMQDLSEFC#SDKPK	3|2	0.02|0.00098	0.01049	0.01345	5	2	1.03811		SUBCELLULAR LOCATION: Endoplasmic reticulum membrane {ECO:0000269|PubMed:30401460}. Rough endoplasmic reticulum membrane {ECO:0000250|UniProtKB:Q9D024}.
Q7Z6B0	424	CCDC91	CCD91_HUMAN Coiled-coil domain-containing protein 91 OS=Homo sapiens OX=9606 GN=CCDC91 PE=1 SV=2	SLSSLELFLSC#AQK|SLSSLELFLSC#AQK	2|1	0.00098|0.00098	0.00098	0	3	2	0		SUBCELLULAR LOCATION: Membrane {ECO:0000269|PubMed:12808037}; Peripheral membrane protein {ECO:0000269|PubMed:12808037}. Golgi apparatus, trans-Golgi network membrane {ECO:0000269|PubMed:12808037}; Peripheral membrane protein {ECO:0000269|PubMed:12808037}. Golgi apparatus, trans-Golgi network {ECO:0000269|PubMed:17596511}. Note=Colocalizes with GGA1, GGA2 and GGA3. {ECO:0000269|PubMed:12808037, E…
Q96F63	17	CCDC97	CCD97_HUMAN Coiled-coil domain-containing protein 97 OS=Homo sapiens OX=9606 GN=CCDC97 PE=1 SV=1	GC#IEPGPGHWGELSR|GC#IEPGPGHWGELSR	2|2	0.36|0.21049	0.28524	0.10572	4	2	22.1935
Q96F63	78	CCDC97	CCD97_HUMAN Coiled-coil domain-containing protein 97 OS=Homo sapiens OX=9606 GN=CCDC97 PE=1 SV=1	LPVC#SQQQGEPDLTEHEK|LPVC#SQQQGEPDLTEHEK	2|1	0.00098|0.49	0.24549	0.34579	3	2	19.7103
Q96F63	122	CCDC97	CCD97_HUMAN Coiled-coil domain-containing protein 97 OS=Homo sapiens OX=9606 GN=CCDC97 PE=1 SV=1	TGLREEHLAC#FGHVR|	1|	0.23|	0.23	NA	1	1	18.6992
Q16663	64	CCL15	CCL15_HUMAN C-C motif chemokine 15 OS=Homo sapiens OX=9606 GN=CCL15 PE=1 SV=2	ISQSIPC#SLMK|	3|	0.12|	0.12	NA	3	1	10.7143	Disulfide bond$Disulfide bond$Disulfide bond	SUBCELLULAR LOCATION: Secreted.	Ontology_term=ECO:0000269;evidence=ECO:0000269|PubMed:10320325;Dbxref=PMID:10320325$Ontology_term=ECO:0000269;evidence=ECO:0000269|PubMed:10320325;Dbxref=PMID:10320325$Ontology_term=ECO:0000269;evidence=ECO:0000269|PubMed:10320325;Dbxref=PMID:10320325
P30281	125	CCND3	CCND3_HUMAN G1/S-specific cyclin-D3 OS=Homo sapiens OX=9606 GN=CCND3 PE=1 SV=2	LC#IYTDHAVSPR|LC#IYTDHAVSPR	1|2	0.16|0.15	0.155	0.00707	3	2	13.4199		SUBCELLULAR LOCATION: Nucleus {ECO:0000269|PubMed:15358120}. Cytoplasm {ECO:0000269|PubMed:15358120}. Membrane {ECO:0000269|PubMed:15358120}. Note=Cyclin D-CDK4 complexes accumulate at the nuclear membrane and are then translocated to the nucleus through interaction with KIP/CIP family members. {ECO:0000250}.
P51946	280	CCNH	CCNH_HUMAN Cyclin-H OS=Homo sapiens OX=9606 GN=CCNH PE=1 SV=1	C#HSAELALNVITK|C#HSAELALNVITK	1|2	0.16|0.79	0.475	0.44548	3	2	32.2034		SUBCELLULAR LOCATION: Nucleus.
O60563	111	CCNT1	CCNT1_HUMAN Cyclin-T1 OS=Homo sapiens OX=9606 GN=CCNT1 PE=1 SV=1	VAHTC#LHPQESLPDTR|VAHTC#LHPQESLPDTR	3|2	0.13|0.04049	0.08525	0.06329	5	2	7.85533		SUBCELLULAR LOCATION: Nucleus {ECO:0000269|PubMed:12944466}.
Q8ND76	39	CCNY	CCNY_HUMAN Cyclin-Y OS=Homo sapiens OX=9606 GN=CCNY PE=1 SV=2	EDTGC#NLQHISDR|EDTGC#NLQHISDR	2|1	1.63049|0.00098	0.81573	1.15224	3	2	44.9257		SUBCELLULAR LOCATION: Cell membrane {ECO:0000269|PubMed:18060517, ECO:0000269|PubMed:19524571, ECO:0000269|PubMed:20059949, ECO:0000269|PubMed:22184064}; Lipid-anchor {ECO:0000269|PubMed:18060517, ECO:0000269|PubMed:19524571, ECO:0000269|PubMed:20059949, ECO:0000269|PubMed:22184064}; Cytoplasmic side {ECO:0000269|PubMed:18060517, ECO:0000269|PubMed:19524571, ECO:0000269|PubMed:20059949, ECO:00002…
O14618	227	CCS	CCS_HUMAN Copper chaperone for superoxide dismutase OS=Homo sapiens OX=9606 GN=CCS PE=1 SV=1	LAC#GIIAR|LAC#GIIAR	2|1	0.00098|0.00098	0.00098	0	3	2	0	Disulfide bond	SUBCELLULAR LOCATION: Cytoplasm {ECO:0000269|PubMed:9726962}.	Ontology_term=ECO:0000244,ECO:0000269;evidence=ECO:0000244|PDB:1DO5,ECO:0000269|PubMed:10677207;Dbxref=PMID:10677207
P78371	289	CCT2	TCPB_HUMAN T-complex protein 1 subunit beta OS=Homo sapiens OX=9606 GN=CCT2 PE=1 SV=4	HGINC#FINR|HGINC#FINR	2|2	0.44|0.155	0.2975	0.20153	4	2	22.9287		SUBCELLULAR LOCATION: Cytoplasm {ECO:0000269|PubMed:20080638}.
P78371	412	CCT2	TCPB_HUMAN T-complex protein 1 subunit beta OS=Homo sapiens OX=9606 GN=CCT2 PE=1 SV=4	TVYGGGC#SEMLMAHAVTQLANR|TVYGGGC#SEMLMAHAVTQLANR	11|9	0.21|0.28	0.245	0.0495	20	2	19.6787		SUBCELLULAR LOCATION: Cytoplasm {ECO:0000269|PubMed:20080638}.
P78371	395	CCT2	TCPB_HUMAN T-complex protein 1 subunit beta OS=Homo sapiens OX=9606 GN=CCT2 PE=1 SV=4	SLHDALC#VLAQTVK|SLHDALC#VLAQTVKDSR SLHDALC#VLAQTVK	6|7	0.01458|0.02	0.01729	0.00383	13	2	1.69961		SUBCELLULAR LOCATION: Cytoplasm {ECO:0000269|PubMed:20080638}.
P78371	535	CCT2	TCPB_HUMAN T-complex protein 1 subunit beta OS=Homo sapiens OX=9606 GN=CCT2 PE=1 SV=4	|VPDHHPC#	|1	|0.00675	0.00675	NA	1	1	0.670474		SUBCELLULAR LOCATION: Cytoplasm {ECO:0000269|PubMed:20080638}.
P49368	372	CCT3	TCPG_HUMAN T-complex protein 1 subunit gamma OS=Homo sapiens OX=9606 GN=CCT3 PE=1 SV=4	AC#TILLR|AC#TILLR	2|1	0.35|0.26	0.305	0.06364	3	2	23.3716	Disulfide bond	SUBCELLULAR LOCATION: Cytoplasm {ECO:0000305}.	Ontology_term=ECO:0000250;evidence=ECO:0000250
P49368	366	CCT3	TCPG_HUMAN T-complex protein 1 subunit gamma OS=Homo sapiens OX=9606 GN=CCT3 PE=1 SV=4	KIGDEYFTFITDC#KDPK IGDEYFTFITDC#KDPK KIGDEYFTFITDC#K|KIGDEYFTFITDC#KDPK IGDEYFTFITDC#KDPK KIGDEYFTFITDC#K IGDEYFTFITDC#K	13|14	0.13|0.255	0.1925	0.08839	27	2	16.1426	Disulfide bond	SUBCELLULAR LOCATION: Cytoplasm {ECO:0000305}.	Ontology_term=ECO:0000250;evidence=ECO:0000250
P49368	455	CCT3	TCPG_HUMAN T-complex protein 1 subunit gamma OS=Homo sapiens OX=9606 GN=CCT3 PE=1 SV=4	TLIQNC#GASTIR|TLIQNC#GASTIR	3|2	0.29|0.505	0.3975	0.15203	5	2	28.4436		SUBCELLULAR LOCATION: Cytoplasm {ECO:0000305}.
P49368	213	CCT3	TCPG_HUMAN T-complex protein 1 subunit gamma OS=Homo sapiens OX=9606 GN=CCT3 PE=1 SV=4	IPGGIIEDSC#VLR|IPGGIIEDSC#VLR	3|2	0.06|0.22	0.14	0.11314	5	2	12.2807		SUBCELLULAR LOCATION: Cytoplasm {ECO:0000305}.
P49368	173	CCT3	TCPG_HUMAN T-complex protein 1 subunit gamma OS=Homo sapiens OX=9606 GN=CCT3 PE=1 SV=4	WSSLAC#NIALDAVK|WSSLAC#NIALDAVK	2|2	0.03|0.185	0.1075	0.1096	4	2	9.70655		SUBCELLULAR LOCATION: Cytoplasm {ECO:0000305}.
P49368	398	CCT3	TCPG_HUMAN T-complex protein 1 subunit gamma OS=Homo sapiens OX=9606 GN=CCT3 PE=1 SV=4	NLQDAMQVC#R|NLQDAMQVC#R	3|3	0.11|0.1	0.105	0.00707	6	2	9.50226		SUBCELLULAR LOCATION: Cytoplasm {ECO:0000305}.
P49368	475	CCT3	TCPG_HUMAN T-complex protein 1 subunit gamma OS=Homo sapiens OX=9606 GN=CCT3 PE=1 SV=4	HTQENC#ETWGVNGETGTLVDMK|HTQENC#ETWGVNGETGTLVDMK	5|5	0.00098|0.09	0.04549	0.06295	10	2	4.35107		SUBCELLULAR LOCATION: Cytoplasm {ECO:0000305}.
P49368	40	CCT3	TCPG_HUMAN T-complex protein 1 subunit gamma OS=Homo sapiens OX=9606 GN=CCT3 PE=1 SV=4	TC#LGPK|TC#LGPK	3|4	0.03|0.02	0.025	0.00707	7	2	2.43902		SUBCELLULAR LOCATION: Cytoplasm {ECO:0000305}.
P50991	450	CCT4	TCPD_HUMAN T-complex protein 1 subunit delta OS=Homo sapiens OX=9606 GN=CCT4 PE=1 SV=4	TLSGMESYC#VR|TLSGMESYC#VR	8|7	0.975|0.21	0.5925	0.54094	15	2	37.2057		SUBCELLULAR LOCATION: Cytoplasm {ECO:0000269|PubMed:17081065, ECO:0000269|PubMed:20080638}. Melanosome {ECO:0000269|PubMed:17081065}. Cytoplasm, cytoskeleton, microtubule organizing center, centrosome {ECO:0000269|PubMed:14654843, ECO:0000269|PubMed:20080638}. Cytoplasm, cytoskeleton, cilium basal body {ECO:0000250|UniProtKB:P80315}. Note=Identified by mass spectrometry in melanosome fractions fr…
P50991	379	CCT4	TCPD_HUMAN T-complex protein 1 subunit delta OS=Homo sapiens OX=9606 GN=CCT4 PE=1 SV=4	ITGC#ASPGK|ITGC#ASPGK	3|2	0.02|0.065	0.0425	0.03182	5	2	4.07674		SUBCELLULAR LOCATION: Cytoplasm {ECO:0000269|PubMed:17081065, ECO:0000269|PubMed:20080638}. Melanosome {ECO:0000269|PubMed:17081065}. Cytoplasm, cytoskeleton, microtubule organizing center, centrosome {ECO:0000269|PubMed:14654843, ECO:0000269|PubMed:20080638}. Cytoplasm, cytoskeleton, cilium basal body {ECO:0000250|UniProtKB:P80315}. Note=Identified by mass spectrometry in melanosome fractions fr…
P50991	295	CCT4	TCPD_HUMAN T-complex protein 1 subunit delta OS=Homo sapiens OX=9606 GN=CCT4 PE=1 SV=4	TGC#NVLLIQK|TGC#NVLLIQK	4|2	0.0066|0.00411	0.00536	0.00176	6	2	0.533142		SUBCELLULAR LOCATION: Cytoplasm {ECO:0000269|PubMed:17081065, ECO:0000269|PubMed:20080638}. Melanosome {ECO:0000269|PubMed:17081065}. Cytoplasm, cytoskeleton, microtubule organizing center, centrosome {ECO:0000269|PubMed:14654843, ECO:0000269|PubMed:20080638}. Cytoplasm, cytoskeleton, cilium basal body {ECO:0000250|UniProtKB:P80315}. Note=Identified by mass spectrometry in melanosome fractions fr…
P50991	337	CCT4	TCPD_HUMAN T-complex protein 1 subunit delta OS=Homo sapiens OX=9606 GN=CCT4 PE=1 SV=4	DIEREDIEFIC#K|DIEREDIEFIC#K	9|5	0.00098|0.00098	0.00098	0	14	2	0		SUBCELLULAR LOCATION: Cytoplasm {ECO:0000269|PubMed:17081065, ECO:0000269|PubMed:20080638}. Melanosome {ECO:0000269|PubMed:17081065}. Cytoplasm, cytoskeleton, microtubule organizing center, centrosome {ECO:0000269|PubMed:14654843, ECO:0000269|PubMed:20080638}. Cytoplasm, cytoskeleton, cilium basal body {ECO:0000250|UniProtKB:P80315}. Note=Identified by mass spectrometry in melanosome fractions fr…
P50991	221	CCT4	TCPD_HUMAN T-complex protein 1 subunit delta OS=Homo sapiens OX=9606 GN=CCT4 PE=1 SV=4	KLGGTIDDC#ELVEGLVLTQK LGGTIDDC#ELVEGLVLTQK|KLGGTIDDC#ELVEGLVLTQK LGGTIDDC#ELVEGLVLTQK	4|4	0.00098|0.00098	0.00098	0	8	2	0		SUBCELLULAR LOCATION: Cytoplasm {ECO:0000269|PubMed:17081065, ECO:0000269|PubMed:20080638}. Melanosome {ECO:0000269|PubMed:17081065}. Cytoplasm, cytoskeleton, microtubule organizing center, centrosome {ECO:0000269|PubMed:14654843, ECO:0000269|PubMed:20080638}. Cytoplasm, cytoskeleton, cilium basal body {ECO:0000250|UniProtKB:P80315}. Note=Identified by mass spectrometry in melanosome fractions fr…
P50991	252	CCT4	TCPD_HUMAN T-complex protein 1 subunit delta OS=Homo sapiens OX=9606 GN=CCT4 PE=1 SV=4	IGLIQFC#LSAPK|IGLIQFC#LSAPK	1|2	0.00098|0.00098	0.00098	0	3	2	0		SUBCELLULAR LOCATION: Cytoplasm {ECO:0000269|PubMed:17081065, ECO:0000269|PubMed:20080638}. Melanosome {ECO:0000269|PubMed:17081065}. Cytoplasm, cytoskeleton, microtubule organizing center, centrosome {ECO:0000269|PubMed:14654843, ECO:0000269|PubMed:20080638}. Cytoplasm, cytoskeleton, cilium basal body {ECO:0000250|UniProtKB:P80315}. Note=Identified by mass spectrometry in melanosome fractions fr…
P48643	181	CCT5	TCPE_HUMAN T-complex protein 1 subunit epsilon OS=Homo sapiens OX=9606 GN=CCT5 PE=1 SV=1	VVNSC#HR|VVNSC#HR	2|2	0.255|0.395	0.325	0.09899	4	2	24.5283		SUBCELLULAR LOCATION: Cytoplasm {ECO:0000269|PubMed:20080638}. Cytoplasm, cytoskeleton, microtubule organizing center, centrosome {ECO:0000269|PubMed:14654843, ECO:0000269|PubMed:20080638}.
P48643	377	CCT5	TCPE_HUMAN T-complex protein 1 subunit epsilon OS=Homo sapiens OX=9606 GN=CCT5 PE=1 SV=1	MLVIEQC#K|MLVIEQC#K	4|3	0.165|0.02	0.0925	0.10253	7	2	8.46682		SUBCELLULAR LOCATION: Cytoplasm {ECO:0000269|PubMed:20080638}. Cytoplasm, cytoskeleton, microtubule organizing center, centrosome {ECO:0000269|PubMed:14654843, ECO:0000269|PubMed:20080638}.
P48643	302	CCT5	TCPE_HUMAN T-complex protein 1 subunit epsilon OS=Homo sapiens OX=9606 GN=CCT5 PE=1 SV=1	ETGANLAIC#QWGFDDEANHLLLQNNLPAVR|	1|	0.09|	0.09	NA	1	1	8.25688		SUBCELLULAR LOCATION: Cytoplasm {ECO:0000269|PubMed:20080638}. Cytoplasm, cytoskeleton, microtubule organizing center, centrosome {ECO:0000269|PubMed:14654843, ECO:0000269|PubMed:20080638}.
P48643	493	CCT5	TCPE_HUMAN T-complex protein 1 subunit epsilon OS=Homo sapiens OX=9606 GN=CCT5 PE=1 SV=1	EMNPALGIDC#LHK|EMNPALGIDC#LHK	7|8	0.09|0.06	0.075	0.02121	15	2	6.97674		SUBCELLULAR LOCATION: Cytoplasm {ECO:0000269|PubMed:20080638}. Cytoplasm, cytoskeleton, microtubule organizing center, centrosome {ECO:0000269|PubMed:14654843, ECO:0000269|PubMed:20080638}.
P48643	440	CCT5	TCPE_HUMAN T-complex protein 1 subunit epsilon OS=Homo sapiens OX=9606 GN=CCT5 PE=1 SV=1	C#PTLEQYAMR|C#PTLEQYAMR	8|9	0.065|0.04	0.0525	0.01768	17	2	4.98812		SUBCELLULAR LOCATION: Cytoplasm {ECO:0000269|PubMed:20080638}. Cytoplasm, cytoskeleton, microtubule organizing center, centrosome {ECO:0000269|PubMed:14654843, ECO:0000269|PubMed:20080638}.
P48643	407	CCT5	TCPE_HUMAN T-complex protein 1 subunit epsilon OS=Homo sapiens OX=9606 GN=CCT5 PE=1 SV=1	SLHDALC#VIRNLIRDNR|	1|	0.04|	0.04	NA	1	1	3.84615		SUBCELLULAR LOCATION: Cytoplasm {ECO:0000269|PubMed:20080638}. Cytoplasm, cytoskeleton, microtubule organizing center, centrosome {ECO:0000269|PubMed:14654843, ECO:0000269|PubMed:20080638}.
P48643	253	CCT5	TCPE_HUMAN T-complex protein 1 subunit epsilon OS=Homo sapiens OX=9606 GN=CCT5 PE=1 SV=1	IAILTC#PFEPPKPK|IAILTC#PFEPPKPK	17|15	0.03|0.02	0.025	0.00707	32	2	2.43902		SUBCELLULAR LOCATION: Cytoplasm {ECO:0000269|PubMed:20080638}. Cytoplasm, cytoskeleton, microtubule organizing center, centrosome {ECO:0000269|PubMed:14654843, ECO:0000269|PubMed:20080638}.
P40227	282	CCT6A	TCPZ_HUMAN T-complex protein 1 subunit zeta OS=Homo sapiens OX=9606 GN=CCT6A PE=1 SV=3	VC#GDSDKGFVVINQK|VC#GDSDKGFVVINQK	1|3	0.62|0.85	0.735	0.16263	4	2	42.3631		SUBCELLULAR LOCATION: Cytoplasm {ECO:0000269|PubMed:8034610}.
P40227	233	CCT6A	TCPZ_HUMAN T-complex protein 1 subunit zeta OS=Homo sapiens OX=9606 GN=CCT6A PE=1 SV=3	RVEDAYILTC#NVSLEYEK VEDAYILTC#NVSLEYEK|RVEDAYILTC#NVSLEYEK VEDAYILTC#NVSLEYEK	5|4	0.27|0.085	0.1775	0.13081	9	2	15.0743		SUBCELLULAR LOCATION: Cytoplasm {ECO:0000269|PubMed:8034610}.
Q99832	158	CCT7	TCPH_HUMAN T-complex protein 1 subunit eta OS=Homo sapiens OX=9606 GN=CCT7 PE=1 SV=2	C#AMTALSSK|C#AMTALSSK	7|6	0.04|0.175	0.1075	0.09546	13	2	9.70655		SUBCELLULAR LOCATION: Cytoplasm {ECO:0000250|UniProtKB:P80313}.
Q99832	364	CCT7	TCPH_HUMAN T-complex protein 1 subunit eta OS=Homo sapiens OX=9606 GN=CCT7 PE=1 SV=2	YNFFTGC#PK|YNFFTGC#PK	3|4	0.00554|0.085	0.04527	0.05619	7	2	4.33094		SUBCELLULAR LOCATION: Cytoplasm {ECO:0000250|UniProtKB:P80313}.
Q99832	345	CCT7	TCPH_HUMAN T-complex protein 1 subunit eta OS=Homo sapiens OX=9606 GN=CCT7 PE=1 SV=2	C#QVFEETQIGGER|C#QVFEETQIGGER	2|1	0.035|0.00098	0.01799	0.02406	3	2	1.76721		SUBCELLULAR LOCATION: Cytoplasm {ECO:0000250|UniProtKB:P80313}.
Q99832	370	CCT7	TCPH_HUMAN T-complex protein 1 subunit eta OS=Homo sapiens OX=9606 GN=CCT7 PE=1 SV=2	TC#TFILR|TC#TFILR	3|3	0.00098|0.0011	0.00104	8e-05	6	2	0		SUBCELLULAR LOCATION: Cytoplasm {ECO:0000250|UniProtKB:P80313}.
Q99832	29	CCT7	TCPH_HUMAN T-complex protein 1 subunit eta OS=Homo sapiens OX=9606 GN=CCT7 PE=1 SV=2	ISAC#QVIAEAVR|ISAC#QVIAEAVR	1|1	0.00098|0.00098	0.00098	0	2	2	0		SUBCELLULAR LOCATION: Cytoplasm {ECO:0000250|UniProtKB:P80313}.
Q99832	326	CCT7	TCPH_HUMAN T-complex protein 1 subunit eta OS=Homo sapiens OX=9606 GN=CCT7 PE=1 SV=2	|TMMAC#GGSIQTSVNALSADVLGR	|1	|0.00098	0.00098	NA	1	1	0		SUBCELLULAR LOCATION: Cytoplasm {ECO:0000250|UniProtKB:P80313}.
P50990	187	CCT8	TCPQ_HUMAN T-complex protein 1 subunit theta OS=Homo sapiens OX=9606 GN=CCT8 PE=1 SV=4	LIAQAC#VSIFPDSGHFNVDNIR|LIAQAC#VSIFPDSGHFNVDNIR	1|1	0.58|1.44	1.01	0.60811	2	2	50.2488		SUBCELLULAR LOCATION: Cytoplasm {ECO:0000269|PubMed:20080638}. Cytoplasm, cytoskeleton, microtubule organizing center, centrosome {ECO:0000269|PubMed:14654843, ECO:0000269|PubMed:20080638}. Cytoplasm, cytoskeleton, cilium basal body {ECO:0000250|UniProtKB:P42932}.
P50990	244	CCT8	TCPQ_HUMAN T-complex protein 1 subunit theta OS=Homo sapiens OX=9606 GN=CCT8 PE=1 SV=4	IAVYSC#PFDGMITETK|IAVYSC#PFDGMITETK	2|2	0.595|0.86	0.7275	0.18738	4	2	42.1129		SUBCELLULAR LOCATION: Cytoplasm {ECO:0000269|PubMed:20080638}. Cytoplasm, cytoskeleton, microtubule organizing center, centrosome {ECO:0000269|PubMed:14654843, ECO:0000269|PubMed:20080638}. Cytoplasm, cytoskeleton, cilium basal body {ECO:0000250|UniProtKB:P42932}.
P50990	347	CCT8	TCPQ_HUMAN T-complex protein 1 subunit theta OS=Homo sapiens OX=9606 GN=CCT8 PE=1 SV=4	LTPPVLEEMGHC#DSVYLSEVGDTQVVVFK|LTPPVLEEMGHC#DSVYLSEVGDTQVVVFK	6|7	0.48|0.48	0.48	0	13	2	32.4324		SUBCELLULAR LOCATION: Cytoplasm {ECO:0000269|PubMed:20080638}. Cytoplasm, cytoskeleton, microtubule organizing center, centrosome {ECO:0000269|PubMed:14654843, ECO:0000269|PubMed:20080638}. Cytoplasm, cytoskeleton, cilium basal body {ECO:0000250|UniProtKB:P42932}.
P50990	430	CCT8	TCPQ_HUMAN T-complex protein 1 subunit theta OS=Homo sapiens OX=9606 GN=CCT8 PE=1 SV=4	QITSYGETC#PGLEQYAIKK QITSYGETC#PGLEQYAIK|QITSYGETC#PGLEQYAIKK QITSYGETC#PGLEQYAIK	3|3	0.15|0.04	0.095	0.07778	6	2	8.6758		SUBCELLULAR LOCATION: Cytoplasm {ECO:0000269|PubMed:20080638}. Cytoplasm, cytoskeleton, microtubule organizing center, centrosome {ECO:0000269|PubMed:14654843, ECO:0000269|PubMed:20080638}. Cytoplasm, cytoskeleton, cilium basal body {ECO:0000250|UniProtKB:P42932}.
P86791	65	CCZ1	CCZ1_HUMAN Vacuolar fusion protein CCZ1 homolog OS=Homo sapiens OX=9606 GN=CCZ1 PE=1 SV=1	NVGLC#EAIVQFTR|NVGLC#EAIVQFTR	2|1	0.29|0.47	0.38	0.12728	3	2	27.5362		SUBCELLULAR LOCATION: Lysosome membrane {ECO:0000269|PubMed:17897319}.
P48509	192	CD151	CD151_HUMAN CD151 antigen OS=Homo sapiens OX=9606 GN=CD151 PE=1 SV=3	TVVALC#GQR|TVVALC#GQR	2|2	0.04|0.01549	0.02774	0.01733	4	2	2.69913		SUBCELLULAR LOCATION: Membrane; Multi-pass membrane protein.
O15446	14	CD3EAP	RPA34_HUMAN DNA-directed RNA polymerase I subunit RPA34 OS=Homo sapiens OX=9606 GN=CD3EAP PE=1 SV=1	FSC#PPNFTAKPPASESPR|FSC#PPNFTAKPPASESPR	3|4	0.42|0.38	0.4	0.02828	7	2	28.5714		SUBCELLULAR LOCATION: Nucleus, nucleolus {ECO:0000269|PubMed:9426281}. Chromosome {ECO:0000269|PubMed:9426281}. Note=Found at the fibrillar centers of the nucleolus in interphase and during cell division it is localized to the nucleolus organizer regions of the chromosomes.
O15446	150	CD3EAP	RPA34_HUMAN DNA-directed RNA polymerase I subunit RPA34 OS=Homo sapiens OX=9606 GN=CD3EAP PE=1 SV=1	FC#AFGGNPPVTGPR|FC#AFGGNPPVTGPR	1|1	0.41|0.3	0.355	0.07778	2	2	26.1993		SUBCELLULAR LOCATION: Nucleus, nucleolus {ECO:0000269|PubMed:9426281}. Chromosome {ECO:0000269|PubMed:9426281}. Note=Found at the fibrillar centers of the nucleolus in interphase and during cell division it is localized to the nucleolus organizer regions of the chromosomes.
P16070	77	CD44	CD44_HUMAN CD44 antigen OS=Homo sapiens OX=9606 GN=CD44 PE=1 SV=3	ALSIGFETC#R|ALSIGFETC#R	2|2	0.335|0.40389	0.36945	0.04871	4	2	26.978	Disulfide bond	SUBCELLULAR LOCATION: Cell membrane {ECO:0000269|PubMed:22726066, ECO:0000269|PubMed:23589287}; Single-pass type I membrane protein {ECO:0000255}. Cell projection, microvillus {ECO:0000250|UniProtKB:P15379}. Note=Colocalizes with actin in membrane protrusions at wounding edges. Co-localizes with RDX, EZR and MSN in microvilli. Localizes to cholesterol-rich membrane-bound lipid raft domains. {ECO:…	Ontology_term=ECO:0000244,ECO:0000244,ECO:0000269;evidence=ECO:0000244|PDB:4PZ3,ECO:0000244|PDB:4PZ4,ECO:0000269|PubMed:25195884;Dbxref=PMID:25195884
P15529	35	CD46	MCP_HUMAN Membrane cofactor protein OS=Homo sapiens OX=9606 GN=CD46 PE=1 SV=3	C#EEPPTFEAMELIGKPK|C#EEPPTFEAMELIGKPK	1|1	0.11|0.6	0.355	0.34648	2	2	26.1993	Disulfide bond	SUBCELLULAR LOCATION: Cytoplasmic vesicle, secretory vesicle, acrosome inner membrane {ECO:0000269|PubMed:12112588, ECO:0000269|PubMed:14597734, ECO:0000269|PubMed:15307194}; Single-pass type I membrane protein {ECO:0000269|PubMed:12112588, ECO:0000269|PubMed:14597734, ECO:0000269|PubMed:15307194}. Note=Inner acrosomal membrane of spermatozoa. Internalized upon binding of Measles virus, Herpesvir…	Ontology_term=ECO:0000255;evidence=ECO:0000255|PROSITE-ProRule:PRU00302
P15529	162	CD46	MCP_HUMAN Membrane cofactor protein OS=Homo sapiens OX=9606 GN=CD46 PE=1 SV=3	VLC#TPPPK|VLC#TPPPK	3|2	0.00098|0.15549	0.07823	0.10926	5	2	7.25541	Disulfide bond	SUBCELLULAR LOCATION: Cytoplasmic vesicle, secretory vesicle, acrosome inner membrane {ECO:0000269|PubMed:12112588, ECO:0000269|PubMed:14597734, ECO:0000269|PubMed:15307194}; Single-pass type I membrane protein {ECO:0000269|PubMed:12112588, ECO:0000269|PubMed:14597734, ECO:0000269|PubMed:15307194}. Note=Inner acrosomal membrane of spermatozoa. Internalized upon binding of Measles virus, Herpesvir…	Ontology_term=ECO:0000255;evidence=ECO:0000255|PROSITE-ProRule:PRU00302
P08174	145	CD55	DAF_HUMAN Complement decay-accelerating factor OS=Homo sapiens OX=9606 GN=CD55 PE=1 SV=4	LTC#LQNLK|LTC#LQNLK	1|2	0.04|0.00549	0.02275	0.0244	3	2	2.2244	Disulfide bond$Disulfide bond	SUBCELLULAR LOCATION: [Isoform 1]: Cell membrane; Single-pass type I membrane protein.; SUBCELLULAR LOCATION: [Isoform 2]: Cell membrane; Lipid-anchor, GPI-anchor.; SUBCELLULAR LOCATION: [Isoform 3]: Secreted {ECO:0000269|PubMed:16503113}.; SUBCELLULAR LOCATION: [Isoform 4]: Secreted {ECO:0000269|PubMed:16503113}.; SUBCELLULAR LOCATION: [Isoform 5]: Secreted {ECO:0000269|PubMed:16503113}.; SUBCEL…	Ontology_term=ECO:0000255,ECO:0000269;evidence=ECO:0000255|PROSITE-ProRule:PRU00302,ECO:0000269|PubMed:1377029;Dbxref=PMID:1377029$Ontology_term=ECO:0000255,ECO:0000269;evidence=ECO:0000255|PROSITE-ProRule:PRU00302,ECO:0000269|PubMed:1377029;Dbxref=PMID:1377029
P08174	158	CD55	DAF_HUMAN Complement decay-accelerating factor OS=Homo sapiens OX=9606 GN=CD55 PE=1 SV=4	WSTAVEFC#K|WSTAVEFC#K	1|1	0.07|0.67	0.37	0.42426	2	2	27.0073	Disulfide bond	SUBCELLULAR LOCATION: [Isoform 1]: Cell membrane; Single-pass type I membrane protein.; SUBCELLULAR LOCATION: [Isoform 2]: Cell membrane; Lipid-anchor, GPI-anchor.; SUBCELLULAR LOCATION: [Isoform 3]: Secreted {ECO:0000269|PubMed:16503113}.; SUBCELLULAR LOCATION: [Isoform 4]: Secreted {ECO:0000269|PubMed:16503113}.; SUBCELLULAR LOCATION: [Isoform 5]: Secreted {ECO:0000269|PubMed:16503113}.; SUBCEL…	Ontology_term=ECO:0000255,ECO:0000269;evidence=ECO:0000255|PROSITE-ProRule:PRU00302,ECO:0000269|PubMed:1377029;Dbxref=PMID:1377029
P13987	70	CD59	CD59_HUMAN CD59 glycoprotein OS=Homo sapiens OX=9606 GN=CD59 PE=1 SV=1	FEHC#NFNDVTTR|FEHC#NFNDVTTR	3|3	0.01|0.01	0.01	0	6	2	0.990099	Disulfide bond	SUBCELLULAR LOCATION: Cell membrane; Lipid-anchor, GPI-anchor. Secreted. Note=Soluble form found in a number of tissues.	Ontology_term=ECO:0000269;evidence=ECO:0000269|PubMed:8276756;Dbxref=PMID:8276756
P60033	175	CD81	CD81_HUMAN CD81 antigen OS=Homo sapiens OX=9606 GN=CD81 PE=1 SV=1	NNLC#PSGSNIISNLFK|NNLC#PSGSNIISNLFK	1|1	0.29|0.36	0.325	0.0495	2	2	24.5283	Disulfide bond$Disulfide bond	SUBCELLULAR LOCATION: Cell membrane {ECO:0000269|PubMed:1383329, ECO:0000269|PubMed:1695320, ECO:0000269|PubMed:20237408, ECO:0000269|PubMed:22307619, ECO:0000269|PubMed:2398277}; Multi-pass membrane protein {ECO:0000255}. Basolateral cell membrane {ECO:0000269|PubMed:20375010}; Multi-pass membrane protein {ECO:0000255}. Note=Associates with CLDN1 and the CLDN1-CD81 complex localizes to the basol…	Ontology_term=ECO:0000244,ECO:0000244,ECO:0000244,ECO:0000244,ECO:0000244,ECO:0000244,ECO:0000244,ECO:0000244,ECO:0000244,ECO:0000244,ECO:0000244,ECO:0000244,ECO:0000244,ECO:0000244,ECO:0000269,ECO:0000269,ECO:0000269,ECO:0000269,ECO:0000269;evidence=ECO:0000244|PDB:1G8Q,ECO:0000244|PDB:1IV5,ECO:0000244|PDB:3X0E,ECO:0000244|PDB:5DFV,ECO:0000244|PDB:5DFW,ECO:0000244|PDB:5M2C,ECO:0000244|PDB:5M33,E…
P48960	513	CD97	CD97_HUMAN CD97 antigen OS=Homo sapiens OX=9606 GN=CD97 PE=1 SV=4	GGHWATEGC#QVLGSK|	1|	1.05|	1.05	NA	1	1	51.2195	Disulfide bond	SUBCELLULAR LOCATION: Cell membrane {ECO:0000250|UniProtKB:Q9Z0M6}; Multi-pass membrane protein {ECO:0000255}.; SUBCELLULAR LOCATION: [Adhesion G protein-coupled receptor E5 subunit alpha]: Secreted, extracellular space {ECO:0000305}.	Ontology_term=ECO:0000255;evidence=ECO:0000255|PROSITE-ProRule:PRU00076
P48960	495	CD97	CD97_HUMAN CD97 antigen OS=Homo sapiens OX=9606 GN=CD97 PE=1 SV=4	QELLC#AFWK|QELLC#AFWK	2|2	0.895|0.76	0.8275	0.09546	4	2	45.2804	Disulfide bond	SUBCELLULAR LOCATION: Cell membrane {ECO:0000250|UniProtKB:Q9Z0M6}; Multi-pass membrane protein {ECO:0000255}.; SUBCELLULAR LOCATION: [Adhesion G protein-coupled receptor E5 subunit alpha]: Secreted, extracellular space {ECO:0000305}.	Ontology_term=ECO:0000255;evidence=ECO:0000255|PROSITE-ProRule:PRU00076
P32320	31	CDA	CDD_HUMAN Cytidine deaminase OS=Homo sapiens OX=9606 GN=CDA PE=1 SV=2	KSAYC#PYSHFPVGAALLTQEGR|KSAYC#PYSHFPVGAALLTQEGR	1|1	0.13|0.21	0.17	0.05657	2	2	14.5299
O75794	170	CDC123	CD123_HUMAN Cell division cycle protein 123 homolog OS=Homo sapiens OX=9606 GN=CDC123 PE=1 SV=1	KWC#ELIPGAEFR|KWC#ELIPGAEFR	3|4	0.39|0.28	0.335	0.07778	7	2	25.0936		SUBCELLULAR LOCATION: Cytoplasm {ECO:0000250}.
Q13042	455	CDC16	CDC16_HUMAN Cell division cycle protein 16 homolog OS=Homo sapiens OX=9606 GN=CDC16 PE=1 SV=2	AIGNEVTVDKWEPLLNNLGHVC#R|AIGNEVTVDKWEPLLNNLGHVC#R	2|2	0.215|0.15549	0.18524	0.04208	4	2	15.6289		SUBCELLULAR LOCATION: Cytoplasm, cytoskeleton, microtubule organizing center, centrosome {ECO:0000269|PubMed:7736578}. Cytoplasm, cytoskeleton, spindle {ECO:0000269|PubMed:7736578}. Note=Colocalizes with CDC27 to the centrosome at all stages of the cell cycle and to the mitotic spindle.
Q13042	267	CDC16	CDC16_HUMAN Cell division cycle protein 16 homolog OS=Homo sapiens OX=9606 GN=CDC16 PE=1 SV=2	DPFHASC#LPVHIGTLVELNK|DPFHASC#LPVHIGTLVELNK	3|3	0.06|0.14	0.1	0.05657	6	2	9.09091		SUBCELLULAR LOCATION: Cytoplasm, cytoskeleton, microtubule organizing center, centrosome {ECO:0000269|PubMed:7736578}. Cytoplasm, cytoskeleton, spindle {ECO:0000269|PubMed:7736578}. Note=Colocalizes with CDC27 to the centrosome at all stages of the cell cycle and to the mitotic spindle.
Q13042	544	CDC16	CDC16_HUMAN Cell division cycle protein 16 homolog OS=Homo sapiens OX=9606 GN=CDC16 PE=1 SV=2	C#YDFDVHTMK|C#YDFDVHTMK	4|4	0.01049|0.02549	0.01799	0.01061	8	2	1.76721		SUBCELLULAR LOCATION: Cytoplasm, cytoskeleton, microtubule organizing center, centrosome {ECO:0000269|PubMed:7736578}. Cytoplasm, cytoskeleton, spindle {ECO:0000269|PubMed:7736578}. Note=Colocalizes with CDC27 to the centrosome at all stages of the cell cycle and to the mitotic spindle.
Q13042	133	CDC16	CDC16_HUMAN Cell division cycle protein 16 homolog OS=Homo sapiens OX=9606 GN=CDC16 PE=1 SV=2	SSIC#LLR|SSIC#LLR	2|2	0.03049|0.00098	0.01573	0.02087	4	2	1.54864		SUBCELLULAR LOCATION: Cytoplasm, cytoskeleton, microtubule organizing center, centrosome {ECO:0000269|PubMed:7736578}. Cytoplasm, cytoskeleton, spindle {ECO:0000269|PubMed:7736578}. Note=Colocalizes with CDC27 to the centrosome at all stages of the cell cycle and to the mitotic spindle.
Q12834	313	CDC20	CDC20_HUMAN Cell division cycle protein 20 homolog OS=Homo sapiens OX=9606 GN=CDC20 PE=1 SV=2	VAEHHVATLSGHSQEVC#GLR|VAEHHVATLSGHSQEVC#GLR	3|1	0.16|0.00098	0.08049	0.11244	4	2	7.4494		SUBCELLULAR LOCATION: Cytoplasm, cytoskeleton, microtubule organizing center, centrosome {ECO:0000269|PubMed:20034488}. Cytoplasm, cytoskeleton, spindle pole {ECO:0000269|PubMed:20034488}.
Q9UJX2	324	CDC23	CDC23_HUMAN Cell division cycle protein 23 homolog OS=Homo sapiens OX=9606 GN=CDC23 PE=1 SV=3	SELSYLAHNLC#EIDK|SELSYLAHNLC#EIDK	2|1	3.32|1.42	2.37	1.3435	3	2	70.3264
Q9UJX2	442	CDC23	CDC23_HUMAN Cell division cycle protein 23 homolog OS=Homo sapiens OX=9606 GN=CDC23 PE=1 SV=3	MLVALGEC#YEK|	1|	0.82|	0.82	NA	1	1	45.0549
Q9UJX2	500	CDC23	CDC23_HUMAN Cell division cycle protein 23 homolog OS=Homo sapiens OX=9606 GN=CDC23 PE=1 SV=3	YIQDIYSC#GEIVEHLEESTAFR|YIQDIYSC#GEIVEHLEESTAFR	1|1	0.35|0.43	0.39	0.05657	2	2	28.0576
Q9UJX2	489	CDC23	CDC23_HUMAN Cell division cycle protein 23 homolog OS=Homo sapiens OX=9606 GN=CDC23 PE=1 SV=3	LHEQLTESEQAAQC#YIK|LHEQLTESEQAAQC#YIK	2|2	0.00098|0.04549	0.02324	0.03147	4	2	2.27122
P49427	191	CDC34	UB2R1_HUMAN Ubiquitin-conjugating enzyme E2 R1 OS=Homo sapiens OX=9606 GN=CDC34 PE=1 SV=2	VPTTLAEYC#VK|VPTTLAEYC#VK	1|2	0.01|0.025	0.0175	0.01061	3	2	1.7199		SUBCELLULAR LOCATION: Cytoplasm. Nucleus. Note=The phosphorylation of the C-terminal tail plays an important role in mediating nuclear localization. Colocalizes with beta-tubulin on mitotic spindles in anaphase.
Q16543	64	CDC37	CDC37_HUMAN Hsp90 co-chaperone Cdc37 OS=Homo sapiens OX=9606 GN=CDC37 PE=1 SV=1	VAEC#QR|VAEC#QR	2|1	0.08|0.1	0.09	0.01414	3	2	8.25688		SUBCELLULAR LOCATION: Cytoplasm {ECO:0000269|PubMed:9482106}.
O60508	29	CDC40	PRP17_HUMAN Pre-mRNA-processing factor 17 OS=Homo sapiens OX=9606 GN=CDC40 PE=1 SV=1	C#PLPAADSLMHLTK|C#PLPAADSLMHLTK	2|3	0.23|0.56	0.395	0.23335	5	2	28.3154		SUBCELLULAR LOCATION: Nucleus {ECO:0000269|PubMed:28076346, ECO:0000269|PubMed:28502770, ECO:0000269|PubMed:29301961, ECO:0000269|PubMed:29360106, ECO:0000269|PubMed:29361316, ECO:0000269|PubMed:30705154}. Nucleus speckle {ECO:0000269|PubMed:9830021}.
P60953	157	CDC42	CDC42_HUMAN Cell division control protein 42 homolog OS=Homo sapiens OX=9606 GN=CDC42 PE=1 SV=2	YVEC#SALTQK|YVEC#SALTQK	2|2	0.02|0.07	0.045	0.03536	4	2	4.30622		SUBCELLULAR LOCATION: Cell membrane {ECO:0000305}; Lipid-anchor {ECO:0000305}; Cytoplasmic side {ECO:0000305}. Cytoplasm, cytoskeleton, microtubule organizing center, centrosome {ECO:0000269|PubMed:15642749}. Cytoplasm, cytoskeleton, spindle {ECO:0000269|PubMed:15642749}. Midbody {ECO:0000269|PubMed:15642749}. Cell projection, dendrite {ECO:0000250|UniProtKB:P60766}. Note=Localizes to spindle dur…
P60953	105	CDC42	CDC42_HUMAN Cell division control protein 42 homolog OS=Homo sapiens OX=9606 GN=CDC42 PE=1 SV=2	WVPEITHHC#PK|WVPEITHHC#PK	9|9	0.03|0.02	0.025	0.00707	18	2	2.43902		SUBCELLULAR LOCATION: Cell membrane {ECO:0000305}; Lipid-anchor {ECO:0000305}; Cytoplasmic side {ECO:0000305}. Cytoplasm, cytoskeleton, microtubule organizing center, centrosome {ECO:0000269|PubMed:15642749}. Cytoplasm, cytoskeleton, spindle {ECO:0000269|PubMed:15642749}. Midbody {ECO:0000269|PubMed:15642749}. Cell projection, dendrite {ECO:0000250|UniProtKB:P60766}. Note=Localizes to spindle dur…
P60953	18	CDC42	CDC42_HUMAN Cell division control protein 42 homolog OS=Homo sapiens OX=9606 GN=CDC42 PE=1 SV=2	TC#LLISYTTNK|TC#LLISYTTNK	1|3	0.00098|0.00098	0.00098	0	4	2	0		SUBCELLULAR LOCATION: Cell membrane {ECO:0000305}; Lipid-anchor {ECO:0000305}; Cytoplasmic side {ECO:0000305}. Cytoplasm, cytoskeleton, microtubule organizing center, centrosome {ECO:0000269|PubMed:15642749}. Cytoplasm, cytoskeleton, spindle {ECO:0000269|PubMed:15642749}. Midbody {ECO:0000269|PubMed:15642749}. Cell projection, dendrite {ECO:0000250|UniProtKB:P60766}. Note=Localizes to spindle dur…
Q5VT25	678	CDC42BPA	MRCKA_HUMAN Serine/threonine-protein kinase MRCK alpha OS=Homo sapiens OX=9606 GN=CDC42BPA PE=1 SV=1	|QISYSPGVC#SIEHQQEITK	|1	|0.00098	0.00098	NA	1	1	0		SUBCELLULAR LOCATION: Cytoplasm {ECO:0000250|UniProtKB:O54874}. Cell projection, lamellipodium {ECO:0000250|UniProtKB:Q3UU96}. Note=Displays a dispersed punctate distribution and concentrates along the cell periphery, especially at the leading edge and cell-cell junction. This concentration is PH-domain dependent. Localizes in the lamellipodium in a FAM89B/LRAP25-dependent manner. {ECO:0000250|Un…
Q9Y5S2	1297	CDC42BPB	MRCKB_HUMAN Serine/threonine-protein kinase MRCK beta OS=Homo sapiens OX=9606 GN=CDC42BPB PE=1 SV=2	|IVILLC#GR	|1	|0.00098	0.00098	NA	1	1	0		SUBCELLULAR LOCATION: Cytoplasm {ECO:0000250}. Cell membrane {ECO:0000269|PubMed:21240187}; Peripheral membrane protein {ECO:0000269|PubMed:21240187}; Cytoplasmic side {ECO:0000269|PubMed:21240187}. Cell junction {ECO:0000269|PubMed:21240187}. Cell projection, lamellipodium {ECO:0000250|UniProtKB:Q3UU96}. Note=Displays a dispersed punctate distribution and concentrates along the cell periphery, e…
Q99459	96	CDC5L	CDC5L_HUMAN Cell division cycle 5-like protein OS=Homo sapiens OX=9606 GN=CDC5L PE=1 SV=2	TAAQC#LEHYEFLLDK|TAAQC#LEHYEFLLDK	4|2	0.08|0.13549	0.10775	0.03924	6	2	9.72692		SUBCELLULAR LOCATION: Nucleus {ECO:0000269|PubMed:10570151, ECO:0000269|PubMed:11544257, ECO:0000269|PubMed:18583928, ECO:0000269|PubMed:28076346, ECO:0000269|PubMed:28502770, ECO:0000269|PubMed:29301961, ECO:0000269|PubMed:29360106, ECO:0000269|PubMed:29361316, ECO:0000269|PubMed:30705154, ECO:0000269|PubMed:30728453, ECO:0000269|PubMed:9038199, ECO:0000269|PubMed:9598309}. Nucleus speckle {ECO:…
P12830	603	CDH1	CADH1_HUMAN Cadherin-1 OS=Homo sapiens OX=9606 GN=CDH1 PE=1 SV=3	TIFFC#ER|TIFFC#ER	1|1	0.14|0.47	0.305	0.23335	2	2	23.3716		SUBCELLULAR LOCATION: Cell junction, adherens junction {ECO:0000269|PubMed:28169360}. Cell membrane {ECO:0000269|PubMed:19403558, ECO:0000269|PubMed:28301459}; Single-pass type I membrane protein. Endosome. Golgi apparatus, trans-Golgi network. Note=Colocalizes with DLGAP5 at sites of cell-cell contact in intestinal epithelial cells. Anchored to actin microfilaments through association with alpha…
Q9UQ88	57	CDK11A	CD11A_HUMAN Cyclin-dependent kinase 11A OS=Homo sapiens OX=9606 GN=CDK11A PE=1 SV=4	DHC#MEITIR|	1|	1.08|	1.08	NA	1	1	51.9231		SUBCELLULAR LOCATION: Cytoplasm. Nucleus.
Q9UQ88	420	CDK11A	CD11A_HUMAN Cyclin-dependent kinase 11A OS=Homo sapiens OX=9606 GN=CDK11A PE=1 SV=4	YLPALQGC#R|YLPALQGC#R	1|1	0.02|0.22	0.12	0.14142	2	2	10.7143		SUBCELLULAR LOCATION: Cytoplasm. Nucleus.
Q9NYV4	1039	CDK12	CDK12_HUMAN Cyclin-dependent kinase 12 OS=Homo sapiens OX=9606 GN=CDK12 PE=1 SV=2	MAPPDLPHWQDC#HELWSK|MAPPDLPHWQDC#HELWSK	1|1	0.6|1.37	0.985	0.54447	2	2	49.6222		SUBCELLULAR LOCATION: Nucleus. Nucleus speckle. Note=Colocalized with nuclear speckles throughout interphase.
Q9NYV4	862	CDK12	CDK12_HUMAN Cyclin-dependent kinase 12 OS=Homo sapiens OX=9606 GN=CDK12 PE=1 SV=2	C#SNILLNNSGQIK|	1|	0.05|	0.05	NA	1	1	4.7619		SUBCELLULAR LOCATION: Nucleus. Nucleus speckle. Note=Colocalized with nuclear speckles throughout interphase.
Q07002	185	CDK18	CDK18_HUMAN Cyclin-dependent kinase 18 OS=Homo sapiens OX=9606 GN=CDK18 PE=1 SV=4	LEHEEGAPC#TAIR|LEHEEGAPC#TAIR	3|1	0.01|0.04	0.025	0.02121	4	2	2.43902
P11802	215	CDK4	CDK4_HUMAN Cyclin-dependent kinase 4 OS=Homo sapiens OX=9606 GN=CDK4 PE=1 SV=2	KPLFC#GNSEADQLGK|KPLFC#GNSEADQLGK	4|5	0.08549|0.29	0.18774	0.14461	9	2	15.8065		SUBCELLULAR LOCATION: Cytoplasm {ECO:0000269|PubMed:18827403}. Nucleus {ECO:0000269|PubMed:18827403, ECO:0000269|PubMed:20399237, ECO:0000269|PubMed:9106657}. Nucleus membrane {ECO:0000269|PubMed:18827403}. Note=Cytoplasmic when non-complexed. Forms a cyclin D-CDK4 complex in the cytoplasm as cells progress through G(1) phase. The complex accumulates on the nuclear membrane and enters the nucleus…
Q96SN8	1886	CDK5RAP2	CK5P2_HUMAN CDK5 regulatory subunit-associated protein 2 OS=Homo sapiens OX=9606 GN=CDK5RAP2 PE=1 SV=5	GNLELRPGGAHPGTC#SPSRPGS|	1|	0.83|	0.83	NA	1	1	45.3552		SUBCELLULAR LOCATION: Cytoplasm, cytoskeleton, microtubule organizing center, centrosome {ECO:0000269|PubMed:14654843, ECO:0000269|PubMed:19553473, ECO:0000269|PubMed:25503564, ECO:0000269|PubMed:25657325, ECO:0000269|PubMed:26482847, ECO:0000269|PubMed:26485573, ECO:0000269|PubMed:29162697}. Golgi apparatus {ECO:0000269|PubMed:20466722}. Cytoplasm {ECO:0000269|PubMed:19553473}. Cytoplasm, cytosk…
Q96JB5	136	CDK5RAP3	CK5P3_HUMAN CDK5 regulatory subunit-associated protein 3 OS=Homo sapiens OX=9606 GN=CDK5RAP3 PE=1 SV=2	C#QQLQQEYSR|C#QQLQQEYSR	2|1	0.225|0.34	0.2825	0.08132	3	2	22.0273		SUBCELLULAR LOCATION: Nucleus {ECO:0000269|PubMed:16173922}. Cytoplasm {ECO:0000269|PubMed:15790566, ECO:0000269|PubMed:16173922, ECO:0000269|PubMed:19223857}. Cytoplasm, cytoskeleton, microtubule organizing center, centrosome {ECO:0000269|PubMed:19223857}. Note=Colocalizes and associates with microtubules. {ECO:0000269|PubMed:23478299}.
P50750	85	CDK9	CDK9_HUMAN Cyclin-dependent kinase 9 OS=Homo sapiens OX=9606 GN=CDK9 PE=1 SV=3	|HENVVNLIEIC#R	|2	|0.08549	0.08549	NA	2	1	7.87571		SUBCELLULAR LOCATION: Nucleus. Cytoplasm. Nucleus, PML body. Note=Accumulates on chromatin in response to replication stress. Complexed with CCNT1 in nuclear speckles, but uncomplexed form in the cytoplasm. The translocation from nucleus to cytoplasm is XPO1/CRM1-dependent. Associates with PML body when acetylated.
Q5VV42	138	CDKAL1	CDKAL_HUMAN Threonylcarbamoyladenosine tRNA methylthiotransferase OS=Homo sapiens OX=9606 GN=CDKAL1 PE=1 SV=1	|IVLAGC#VPQAQPR	|1	|0.00098	0.00098	NA	1	1	0	Metal binding	SUBCELLULAR LOCATION: Endoplasmic reticulum membrane {ECO:0000269|PubMed:23048041}; Single-pass membrane protein {ECO:0000255}. Note=Is a tail-anchored protein that exploits the TCR40 pathway for insertion into the endoplasmic reticulum. {ECO:0000269|PubMed:23048041}.	Note=Iron-sulfur (4Fe-4S);Ontology_term=ECO:0000255;evidence=ECO:0000255|PROSITE-ProRule:PRU00780
Q5VV42	538	CDKAL1	CDKAL_HUMAN Threonylcarbamoyladenosine tRNA methylthiotransferase OS=Homo sapiens OX=9606 GN=CDKAL1 PE=1 SV=1	NGLGNQLSSGSHTSAASQC#DSASSR|	1|	0.00098|	0.00098	NA	1	1	0		SUBCELLULAR LOCATION: Endoplasmic reticulum membrane {ECO:0000269|PubMed:23048041}; Single-pass membrane protein {ECO:0000255}. Note=Is a tail-anchored protein that exploits the TCR40 pathway for insertion into the endoplasmic reticulum. {ECO:0000269|PubMed:23048041}.
P38936	117	CDKN1A	CDN1A_HUMAN Cyclin-dependent kinase inhibitor 1 OS=Homo sapiens OX=9606 GN=CDKN1A PE=1 SV=3	RPGTSPALLQGTAEEDHVDLSLSC#TLVPR|RPGTSPALLQGTAEEDHVDLSLSC#TLVPR	2|2	3.28|2.39	2.835	0.62933	4	2	73.9244		SUBCELLULAR LOCATION: Cytoplasm {ECO:0000269|PubMed:11463845}. Nucleus {ECO:0000269|PubMed:11463845, ECO:0000269|PubMed:23213251}.
Q9NXV6	178	CDKN2AIP	CARF_HUMAN CDKN2A-interacting protein OS=Homo sapiens OX=9606 GN=CDKN2AIP PE=1 SV=3	ASAQQENSSTC#IGSAIK|ASAQQENSSTC#IGSAIK	1|1	0.11|0.06	0.085	0.03536	2	2	7.8341		SUBCELLULAR LOCATION: Nucleus, nucleoplasm {ECO:0000269|PubMed:12154087, ECO:0000269|PubMed:12581788}.
P17676	156	CEBPB	CEBPB_HUMAN CCAAT/enhancer-binding protein beta OS=Homo sapiens OX=9606 GN=CEBPB PE=1 SV=2	GALHPGC#FAPLHPPPPPPPPPAELK|GALHPGC#FAPLHPPPPPPPPPAELK	2|2	1.03|2.295	1.6625	0.89449	4	2	62.4413		SUBCELLULAR LOCATION: Nucleus {ECO:0000269|PubMed:20829347}. Cytoplasm {ECO:0000269|PubMed:9374525}. Note=Translocates to the nucleus when phosphorylated at Ser-288. In T-cells when sumoylated drawn to pericentric heterochromatin thereby allowing proliferation (By similarity). {ECO:0000250|UniProtKB:P28033, ECO:0000269|PubMed:9374525}.
P17676	248	CEBPB	CEBPB_HUMAN CCAAT/enhancer-binding protein beta OS=Homo sapiens OX=9606 GN=CEBPB PE=1 SV=2	APPTAC#YAGAAPAPSQVK|APPTAC#YAGAAPAPSQVK	3|3	0.03|0.03	0.03	0	6	2	2.91262		SUBCELLULAR LOCATION: Nucleus {ECO:0000269|PubMed:20829347}. Cytoplasm {ECO:0000269|PubMed:9374525}. Note=Translocates to the nucleus when phosphorylated at Ser-288. In T-cells when sumoylated drawn to pericentric heterochromatin thereby allowing proliferation (By similarity). {ECO:0000250|UniProtKB:P28033, ECO:0000269|PubMed:9374525}.
Q03701	560	CEBPZ	CEBPZ_HUMAN CCAAT/enhancer-binding protein zeta OS=Homo sapiens OX=9606 GN=CEBPZ PE=1 SV=3	|MLDPGLMTC#SK	|2	|2.695	2.695	NA	2	1	72.9364		SUBCELLULAR LOCATION: Nucleus.
Q03701	706	CEBPZ	CEBPZ_HUMAN CCAAT/enhancer-binding protein zeta OS=Homo sapiens OX=9606 GN=CEBPZ PE=1 SV=3	NPLFC#GAENTSLWELKK NPLFC#GAENTSLWELK|NPLFC#GAENTSLWELKK	5|2	0.22|0.25549	0.23774	0.0251	7	2	19.2076		SUBCELLULAR LOCATION: Nucleus.
Q03701	374	CEBPZ	CEBPZ_HUMAN CCAAT/enhancer-binding protein zeta OS=Homo sapiens OX=9606 GN=CEBPZ PE=1 SV=3	ALTVAHELLC#NKPEEEK|ALTVAHELLC#NKPEEEK	3|3	0.04|0.1	0.07	0.04243	6	2	6.54206		SUBCELLULAR LOCATION: Nucleus.
Q03701	282	CEBPZ	CEBPZ_HUMAN CCAAT/enhancer-binding protein zeta OS=Homo sapiens OX=9606 GN=CEBPZ PE=1 SV=3	QQC#LMALDTFK|QQC#LMALDTFK	4|3	0.08|0.02	0.05	0.04243	7	2	4.7619		SUBCELLULAR LOCATION: Nucleus.
Q03701	411	CEBPZ	CEBPZ_HUMAN CCAAT/enhancer-binding protein zeta OS=Homo sapiens OX=9606 GN=CEBPZ PE=1 SV=3	ASHLLETLLC#K|ASHLLETLLC#K	5|6	0.05|0.00264	0.02632	0.03349	11	2	2.5645		SUBCELLULAR LOCATION: Nucleus.
Q92879	177	CELF1	CELF1_HUMAN CUGBP Elav-like family member 1 OS=Homo sapiens OX=9606 GN=CELF1 PE=1 SV=2	AMHQAQTMEGC#SSPMVVK|AMHQAQTMEGC#SSPMVVK	17|21	0.11|0.11	0.11	0	38	2	9.90991		SUBCELLULAR LOCATION: Nucleus {ECO:0000269|PubMed:8948631}. Cytoplasm {ECO:0000269|PubMed:8948631}. Note=RNA-binding activity is detected in both nuclear and cytoplasmic compartments.
Q92879	137	CELF1	CELF1_HUMAN CUGBP Elav-like family member 1 OS=Homo sapiens OX=9606 GN=CELF1 PE=1 SV=2	VMFSSFGQIEEC#R|VMFSSFGQIEEC#R	1|1	0.00098|0.18	0.09049	0.12659	2	2	8.2981		SUBCELLULAR LOCATION: Nucleus {ECO:0000269|PubMed:8948631}. Cytoplasm {ECO:0000269|PubMed:8948631}. Note=RNA-binding activity is detected in both nuclear and cytoplasmic compartments.
Q9UHN6	554	CEMIP2	CEIP2_HUMAN Cell surface hyaluronidase OS=Homo sapiens OX=9606 GN=CEMIP2 PE=1 SV=1	YPVHFHLC#GDVDYK|YPVHFHLC#GDVDYK	1|1	0.23|0.88	0.555	0.45962	2	2	35.6913		SUBCELLULAR LOCATION: Cell membrane {ECO:0000269|PubMed:28246172}; Single-pass type II membrane protein {ECO:0000269|PubMed:28246172}.
P07199	135	CENPB	CENPB_HUMAN Major centromere autoantigen B OS=Homo sapiens OX=9606 GN=CENPB PE=1 SV=2	HGVVSC#SGVAR|	1|	1.02|	1.02	NA	1	1	50.495		SUBCELLULAR LOCATION: Nucleus {ECO:0000255|PROSITE-ProRule:PRU00320, ECO:0000255|PROSITE-ProRule:PRU00583, ECO:0000269|PubMed:18072184}. Chromosome, centromere {ECO:0000269|PubMed:18072184}.
P49454	621	CENPF	CENPF_HUMAN Centromere protein F OS=Homo sapiens OX=9606 GN=CENPF PE=1 SV=3	TLFSC#WK|	1|	0.48|	0.48	NA	1	1	32.4324		SUBCELLULAR LOCATION: Cytoplasm, perinuclear region. Nucleus matrix. Chromosome, centromere, kinetochore. Cytoplasm, cytoskeleton, spindle. Note=Relocalizes to the kinetochore/centromere (coronal surface of the outer plate) and the spindle during mitosis. Observed in nucleus during interphase but not in the nucleolus. At metaphase becomes localized to areas including kinetochore and mitotic appar…
Q7Z7K6	216	CENPV	CENPV_HUMAN Centromere protein V OS=Homo sapiens OX=9606 GN=CENPV PE=1 SV=1	AQHTFC#K|AQHTFC#K	1|1	0.03|0.66	0.345	0.44548	2	2	25.6506	Metal binding	SUBCELLULAR LOCATION: Chromosome, centromere, kinetochore {ECO:0000269|PubMed:18772885}. Nucleus {ECO:0000269|PubMed:12196509}. Cytoplasm, cytoskeleton, spindle {ECO:0000269|PubMed:18772885}. Note=Enriched at the nuclear periphery and around the nucleolus (PubMed:12196509). In mitotic cells, localizes to kinetochores from prometaphase to metaphase (PubMed:18772885). At anaphase onset, transfers t…	Note=Zinc 1%3B structural;Ontology_term=ECO:0000255;evidence=ECO:0000255|PROSITE-ProRule:PRU01239
Q7Z7K6	219	CENPV	CENPV_HUMAN Centromere protein V OS=Homo sapiens OX=9606 GN=CENPV PE=1 SV=1	C#GVQSFYTPR|C#GVQSFYTPR	6|6	0.00519|0.02	0.0126	0.01047	12	2	1.24432	Metal binding	SUBCELLULAR LOCATION: Chromosome, centromere, kinetochore {ECO:0000269|PubMed:18772885}. Nucleus {ECO:0000269|PubMed:12196509}. Cytoplasm, cytoskeleton, spindle {ECO:0000269|PubMed:18772885}. Note=Enriched at the nuclear periphery and around the nucleolus (PubMed:12196509). In mitotic cells, localizes to kinetochores from prometaphase to metaphase (PubMed:18772885). At anaphase onset, transfers t…	Note=Zinc 1%3B structural;Ontology_term=ECO:0000255;evidence=ECO:0000255|PROSITE-ProRule:PRU01239
Q7Z7K6	240	CENPV	CENPV_HUMAN Centromere protein V OS=Homo sapiens OX=9606 GN=CENPV PE=1 SV=1	SNPGGFGIAPHC#LDEGTVR|SNPGGFGIAPHC#LDEGTVR	2|5	0.175|0.23	0.2025	0.03889	7	2	16.8399		SUBCELLULAR LOCATION: Chromosome, centromere, kinetochore {ECO:0000269|PubMed:18772885}. Nucleus {ECO:0000269|PubMed:12196509}. Cytoplasm, cytoskeleton, spindle {ECO:0000269|PubMed:18772885}. Note=Enriched at the nuclear periphery and around the nucleolus (PubMed:12196509). In mitotic cells, localizes to kinetochores from prometaphase to metaphase (PubMed:18772885). At anaphase onset, transfers t…
Q9Y4F5	141	CEP170B	C170B_HUMAN Centrosomal protein of 170 kDa protein B OS=Homo sapiens OX=9606 GN=CEP170B PE=1 SV=4	SEALPEHTPYC#EASNPRPEK|SEALPEHTPYC#EASNPRPEK	1|1	0.13|0.16	0.145	0.02121	2	2	12.6638		SUBCELLULAR LOCATION: Cytoplasm, cytoskeleton {ECO:0000250|UniProtKB:Q498L0}.
Q9BYV8	240	CEP41	CEP41_HUMAN Centrosomal protein of 41 kDa OS=Homo sapiens OX=9606 GN=CEP41 PE=1 SV=1	LASQAATTMC#ER|LASQAATTMC#ER	3|1	0.06|0.73	0.395	0.47376	4	2	28.3154		SUBCELLULAR LOCATION: Cytoplasm, cytoskeleton, microtubule organizing center, centrosome {ECO:0000269|PubMed:14654843}. Cell projection, cilium. Cytoplasm, cytoskeleton, cilium basal body. Note=Localizes mainly to the cilium basal body and in primary cilia.
Q9BYV8	171	CEP41	CEP41_HUMAN Centrosomal protein of 41 kDa OS=Homo sapiens OX=9606 GN=CEP41 PE=1 SV=1	DKPYPDC#PFLLLDVR|DKPYPDC#PFLLLDVR	1|2	0.00098|0.06049	0.03074	0.04208	3	2	2.98232		SUBCELLULAR LOCATION: Cytoplasm, cytoskeleton, microtubule organizing center, centrosome {ECO:0000269|PubMed:14654843}. Cell projection, cilium. Cytoplasm, cytoskeleton, cilium basal body. Note=Localizes mainly to the cilium basal body and in primary cilia.
Q9C0F1	244	CEP44	CEP44_HUMAN Centrosomal protein of 44 kDa OS=Homo sapiens OX=9606 GN=CEP44 PE=1 SV=2	AEQQDVNVNPEITALQTMLAEC#QENLKK|	1|	0.95|	0.95	NA	1	1	48.7179		SUBCELLULAR LOCATION: Cytoplasm, cytoskeleton, microtubule organizing center, centrosome {ECO:0000269|PubMed:21399614}. Cytoplasm, cytoskeleton, spindle pole {ECO:0000269|PubMed:21399614}. Midbody {ECO:0000269|PubMed:21399614}. Note=Localizes to centrosomes, spindle poles, and weakly in midbody.
Q53EZ4	159	CEP55	CEP55_HUMAN Centrosomal protein of 55 kDa OS=Homo sapiens OX=9606 GN=CEP55 PE=1 SV=3	|LSQTVAPNC#FNSSINNIHEMEIQLK	|1	|0.69	0.69	NA	1	1	40.8284		SUBCELLULAR LOCATION: Cytoplasm {ECO:0000269|PubMed:28264986}. Cytoplasm, cytoskeleton, microtubule organizing center, centrosome, centriole {ECO:0000269|PubMed:16198290}. Cytoplasm, cytoskeleton, microtubule organizing center, centrosome {ECO:0000269|PubMed:16198290}. Cleavage furrow {ECO:0000269|PubMed:16198290}. Midbody, Midbody ring {ECO:0000269|PubMed:16198290, ECO:0000269|PubMed:17853893, E…
Q53EZ4	443	CEP55	CEP55_HUMAN Centrosomal protein of 55 kDa OS=Homo sapiens OX=9606 GN=CEP55 PE=1 SV=3	C#NIQYPATEHR|C#NIQYPATEHR	5|5	0.14|0.25	0.195	0.07778	10	2	16.318		SUBCELLULAR LOCATION: Cytoplasm {ECO:0000269|PubMed:28264986}. Cytoplasm, cytoskeleton, microtubule organizing center, centrosome, centriole {ECO:0000269|PubMed:16198290}. Cytoplasm, cytoskeleton, microtubule organizing center, centrosome {ECO:0000269|PubMed:16198290}. Cleavage furrow {ECO:0000269|PubMed:16198290}. Midbody, Midbody ring {ECO:0000269|PubMed:16198290, ECO:0000269|PubMed:17853893, E…
Q8IW35	599	CEP97	CEP97_HUMAN Centrosomal protein of 97 kDa OS=Homo sapiens OX=9606 GN=CEP97 PE=1 SV=1	|MQEHIVC#LTDEIR	|1	|2.92	2.92	NA	1	1	74.4898		SUBCELLULAR LOCATION: Cytoplasm, cytoskeleton, microtubule organizing center, centrosome {ECO:0000269|PubMed:14654843, ECO:0000269|PubMed:17719545}.
Q8N5B7	124	CERS5	CERS5_HUMAN Ceramide synthase 5 OS=Homo sapiens OX=9606 GN=CERS5 PE=1 SV=1	IQC#WFR|IQC#WFR	2|2	0.215|0.115	0.165	0.07071	4	2	14.1631		SUBCELLULAR LOCATION: Endoplasmic reticulum membrane {ECO:0000250|UniProtKB:Q9D6K9}; Multi-pass membrane protein {ECO:0000255}.
Q6ZMG9	236	CERS6	CERS6_HUMAN Ceramide synthase 6 OS=Homo sapiens OX=9606 GN=CERS6 PE=1 SV=1	VGTLVLC#LHDSADALLEAAK|VGTLVLC#LHDSADALLEAAK	2|2	0.00098|0.00098	0.00098	0	4	2	0		SUBCELLULAR LOCATION: Endoplasmic reticulum membrane {ECO:0000250|UniProtKB:Q8C172}; Multi-pass membrane protein {ECO:0000250|UniProtKB:Q8C172}.
Q9Y5P4	185	CERT	CERT_HUMAN Ceramide transfer protein OS=Homo sapiens OX=9606 GN=CERT PE=1 SV=1	YFDAC#ADAVSKDELQR|	1|	1.28|	1.28	NA	1	1	56.1404		SUBCELLULAR LOCATION: Cytoplasm {ECO:0000269|PubMed:16895911, ECO:0000269|PubMed:18184806}. Golgi apparatus {ECO:0000269|PubMed:16895911, ECO:0000269|PubMed:18184806}. Endoplasmic reticulum {ECO:0000269|PubMed:16895911, ECO:0000269|PubMed:18184806}. Note=Preferentially localized to the Golgi apparatus. {ECO:0000305|PubMed:16895911}.
Q9Y5P4	459	CERT	CERT_HUMAN Ceramide transfer protein OS=Homo sapiens OX=9606 GN=CERT PE=1 SV=1	GVTGHEVC#NYFWNVDVR|GVTGHEVC#NYFWNVDVR	1|2	0.97|0.08049	0.52524	0.62898	3	2	34.4365		SUBCELLULAR LOCATION: Cytoplasm {ECO:0000269|PubMed:16895911, ECO:0000269|PubMed:18184806}. Golgi apparatus {ECO:0000269|PubMed:16895911, ECO:0000269|PubMed:18184806}. Endoplasmic reticulum {ECO:0000269|PubMed:16895911, ECO:0000269|PubMed:18184806}. Note=Preferentially localized to the Golgi apparatus. {ECO:0000305|PubMed:16895911}.
Q9Y5P4	84	CERT	CERT_HUMAN Ceramide transfer protein OS=Homo sapiens OX=9606 GN=CERT PE=1 SV=1	AVITPHDFDEC#R|AVITPHDFDEC#R	1|1	0.13|0.39	0.26	0.18385	2	2	20.6349		SUBCELLULAR LOCATION: Cytoplasm {ECO:0000269|PubMed:16895911, ECO:0000269|PubMed:18184806}. Golgi apparatus {ECO:0000269|PubMed:16895911, ECO:0000269|PubMed:18184806}. Endoplasmic reticulum {ECO:0000269|PubMed:16895911, ECO:0000269|PubMed:18184806}. Note=Preferentially localized to the Golgi apparatus. {ECO:0000305|PubMed:16895911}.
P23141	274	CES1	EST1_HUMAN Liver carboxylesterase 1 OS=Homo sapiens OX=9606 GN=CES1 PE=1 SV=2	KGDVKPLAEQIAITAGC#K GDVKPLAEQIAITAGC#K|KGDVKPLAEQIAITAGC#K GDVKPLAEQIAITAGC#K	16|17	0.08|0.05	0.065	0.02121	33	2	6.10329	Disulfide bond	SUBCELLULAR LOCATION: Endoplasmic reticulum lumen {ECO:0000269|PubMed:10562416}.	.
P23141	285	CES1	EST1_HUMAN Liver carboxylesterase 1 OS=Homo sapiens OX=9606 GN=CES1 PE=1 SV=2	TTTSAVMVHC#LR|TTTSAVMVHC#LR	3|2	0.04|0.00549	0.02275	0.0244	5	2	2.2244	Disulfide bond	SUBCELLULAR LOCATION: Endoplasmic reticulum lumen {ECO:0000269|PubMed:10562416}.	.
P23141	390	CES1	EST1_HUMAN Liver carboxylesterase 1 OS=Homo sapiens OX=9606 GN=CES1 PE=1 SV=2	SYPLVC#IAK|SYPLVC#IAK	4|6	0.00487|0.00168	0.00328	0.00226	10	2	0.326928		SUBCELLULAR LOCATION: Endoplasmic reticulum lumen {ECO:0000269|PubMed:10562416}.
Q9Y6A4	119	CFAP20	CFA20_HUMAN Cilia- and flagella-associated protein 20 OS=Homo sapiens OX=9606 GN=CFAP20 PE=1 SV=1	VKPFIC#TMPMR|VKPFIC#TMPMR	4|4	0.25|0.125	0.1875	0.08839	8	2	15.7895		SUBCELLULAR LOCATION: Nucleus. Cytoplasm, cytoskeleton, microtubule organizing center, centrosome, centriole. Cytoplasm, cytoskeleton, cilium basal body. Cell projection, cilium.
P23528	39	CFL1	COF1_HUMAN Cofilin-1 OS=Homo sapiens OX=9606 GN=CFL1 PE=1 SV=3	VLFC#LSEDKK KAVLFC#LSEDK AVLFC#LSEDKK LFC#LSEDKK FC#LSEDKK AVLFC#LSEDK|KAVLFC#LSEDKK VLFC#LSEDKK KAVLFC#LSEDK AVLFC#LSEDKK LFC#LSEDKK FC#LSEDKK AVLFC#LSEDK	23|19	0.06|0.00833	0.03417	0.03654	42	2	3.3041		SUBCELLULAR LOCATION: Nucleus matrix {ECO:0000269|PubMed:15580268}. Cytoplasm, cytoskeleton {ECO:0000269|PubMed:15580268}. Cell projection, ruffle membrane {ECO:0000269|PubMed:15580268}; Peripheral membrane protein {ECO:0000269|PubMed:15580268}; Cytoplasmic side {ECO:0000269|PubMed:15580268}. Cell projection, lamellipodium membrane {ECO:0000269|PubMed:15580268}; Peripheral membrane protein {ECO:0…
P23528	139	CFL1	COF1_HUMAN Cofilin-1 OS=Homo sapiens OX=9606 GN=CFL1 PE=1 SV=3	HELQANC#YEEVKDR HELQANC#YEEVK LTGIKHELQANC#YEEVK|HELQANC#YEEVKDR HELQANC#YEEVK LTGIKHELQANC#YEEVK	23|19	0.02|0.02	0.02	0	42	2	1.96078		SUBCELLULAR LOCATION: Nucleus matrix {ECO:0000269|PubMed:15580268}. Cytoplasm, cytoskeleton {ECO:0000269|PubMed:15580268}. Cell projection, ruffle membrane {ECO:0000269|PubMed:15580268}; Peripheral membrane protein {ECO:0000269|PubMed:15580268}; Cytoplasmic side {ECO:0000269|PubMed:15580268}. Cell projection, lamellipodium membrane {ECO:0000269|PubMed:15580268}; Peripheral membrane protein {ECO:0…
P23528	80	CFL1	COF1_HUMAN Cofilin-1 OS=Homo sapiens OX=9606 GN=CFL1 PE=1 SV=3	MLPDKDC#R|MLPDKDC#R	26|24	0.01|0.01	0.01	0	50	2	0.990099		SUBCELLULAR LOCATION: Nucleus matrix {ECO:0000269|PubMed:15580268}. Cytoplasm, cytoskeleton {ECO:0000269|PubMed:15580268}. Cell projection, ruffle membrane {ECO:0000269|PubMed:15580268}; Peripheral membrane protein {ECO:0000269|PubMed:15580268}; Cytoplasmic side {ECO:0000269|PubMed:15580268}. Cell projection, lamellipodium membrane {ECO:0000269|PubMed:15580268}; Peripheral membrane protein {ECO:0…
Q9Y281	80	CFL2	COF2_HUMAN Cofilin-2 OS=Homo sapiens OX=9606 GN=CFL2 PE=1 SV=1	LLPLNDC#R|LLPLNDC#R	3|2	0.04|0.09549	0.06774	0.03924	5	2	6.34424		SUBCELLULAR LOCATION: Nucleus matrix {ECO:0000250}. Cytoplasm, cytoskeleton {ECO:0000250}. Note=Colocalizes with CSPR3 in the Z line of sarcomeres. {ECO:0000269|PubMed:19752190}.
Q9Y281	39	CFL2	COF2_HUMAN Cofilin-2 OS=Homo sapiens OX=9606 GN=CFL2 PE=1 SV=1	AVLFC#LSDDKR|AVLFC#LSDDKR	3|4	0.01|0.00098	0.00549	0.00638	7	2	0.546002		SUBCELLULAR LOCATION: Nucleus matrix {ECO:0000250}. Cytoplasm, cytoskeleton {ECO:0000250}. Note=Colocalizes with CSPR3 in the Z line of sarcomeres. {ECO:0000269|PubMed:19752190}.
Q8N884	446	CGAS	CGAS_HUMAN Cyclic GMP-AMP synthase OS=Homo sapiens OX=9606 GN=CGAS PE=1 SV=2	TAFFHVC#TQNPQDSQWDR|TAFFHVC#TQNPQDSQWDR	2|1	0.00098|0.00098	0.00098	0	3	2	0		SUBCELLULAR LOCATION: Cell membrane {ECO:0000269|PubMed:30827685}; Peripheral membrane protein {ECO:0000269|PubMed:30827685}. Cytoplasm, cytosol {ECO:0000269|PubMed:23258413, ECO:0000269|PubMed:26048138, ECO:0000269|PubMed:29937271, ECO:0000269|PubMed:30799039, ECO:0000269|PubMed:30827685}. Nucleus {ECO:0000269|PubMed:29937271, ECO:0000269|PubMed:30356214}. Note=In resting conditions, localizes a…
Q13111	79	CHAF1A	CAF1A_HUMAN Chromatin assembly factor 1 subunit A OS=Homo sapiens OX=9606 GN=CHAF1A PE=1 SV=3	SPDLEASLDTLENNC#HVGSDIDFRPK|SPDLEASLDTLENNC#HVGSDIDFRPK	2|1	0.895|1.55	1.2225	0.46315	3	2	55.0056		SUBCELLULAR LOCATION: Nucleus {ECO:0000269|PubMed:10052459}. Note=DNA replication foci.
Q96JM3	770	CHAMP1	CHAP1_HUMAN Chromosome alignment-maintaining phosphoprotein 1 OS=Homo sapiens OX=9606 GN=CHAMP1 PE=1 SV=2	C#NFESNFPR|C#NFESNFPR	2|2	0.06|0.03549	0.04774	0.01733	4	2	4.55647		SUBCELLULAR LOCATION: Nucleus {ECO:0000269|PubMed:21063390}. Chromosome {ECO:0000269|PubMed:21063390}. Chromosome, centromere, kinetochore {ECO:0000269|PubMed:21063390}. Cytoplasm, cytoskeleton, spindle {ECO:0000269|PubMed:21063390}.
Q9NX63	183	CHCHD3	MIC19_HUMAN MICOS complex subunit MIC19 OS=Homo sapiens OX=9606 GN=CHCHD3 PE=1 SV=1	YESHPVC#ADLQAK|YESHPVC#ADLQAK	2|2	0.105|0.095	0.1	0.00707	4	2	9.09091	Disulfide bond	SUBCELLULAR LOCATION: Mitochondrion inner membrane {ECO:0000250|UniProtKB:Q9CRB9}; Lipid-anchor {ECO:0000305}; Intermembrane side {ECO:0000250|UniProtKB:Q9CRB9}. Cytoplasm {ECO:0000269|PubMed:22567091}. Nucleus {ECO:0000269|PubMed:22567091}. Mitochondrion {ECO:0000269|PubMed:25781180, ECO:0000269|PubMed:25997101}.	Ontology_term=ECO:0000255;evidence=ECO:0000255|PROSITE-ProRule:PRU01150
O14646	1176	CHD1	CHD1_HUMAN Chromodomain-helicase-DNA-binding protein 1 OS=Homo sapiens OX=9606 GN=CHD1 PE=1 SV=2	LGELVHNGC#IK|LGELVHNGC#IK	1|1	1.03|1.57	1.3	0.38184	2	2	56.5217		SUBCELLULAR LOCATION: Nucleus {ECO:0000250|UniProtKB:P40201}. Cytoplasm {ECO:0000250|UniProtKB:P40201}. Note=Is released into the cytoplasm when cells enter mitosis and is reincorporated into chromatin during telophase-cytokinesis. {ECO:0000250|UniProtKB:P40201}.
Q86WJ1	135	CHD1L	CHD1L_HUMAN Chromodomain-helicase-DNA-binding protein 1-like OS=Homo sapiens OX=9606 GN=CHD1L PE=1 SV=3	AC#LQQDLK|AC#LQQDLK	1|1	3.26|0.78	2.02	1.75362	2	2	66.8874		SUBCELLULAR LOCATION: Nucleus {ECO:0000269|PubMed:19661379}. Note=Localizes at sites of DNA damage. Probably recruited to DNA damage sites by PARylated PARP1.
Q86WJ1	739	CHD1L	CHD1L_HUMAN Chromodomain-helicase-DNA-binding protein 1-like OS=Homo sapiens OX=9606 GN=CHD1L PE=1 SV=3	|YVSGDVTHPQAGAEDALIVHC#VDDSGHWGR	|1	|0.88	0.88	NA	1	1	46.8085		SUBCELLULAR LOCATION: Nucleus {ECO:0000269|PubMed:19661379}. Note=Localizes at sites of DNA damage. Probably recruited to DNA damage sites by PARylated PARP1.
Q86WJ1	123	CHD1L	CHD1L_HUMAN Chromodomain-helicase-DNA-binding protein 1-like OS=Homo sapiens OX=9606 GN=CHD1L PE=1 SV=3	|FAPGLSC#VTYAGDKEER	|2	|0.08	0.08	NA	2	1	7.40741		SUBCELLULAR LOCATION: Nucleus {ECO:0000269|PubMed:19661379}. Note=Localizes at sites of DNA damage. Probably recruited to DNA damage sites by PARylated PARP1.
O14647	440	CHD2	CHD2_HUMAN Chromodomain-helicase-DNA-binding protein 2 OS=Homo sapiens OX=9606 GN=CHD2 PE=1 SV=2	FQNC#IDSFHSR|FQNC#IDSFHSR	2|1	0.55|0.66	0.605	0.07778	3	2	37.6947		SUBCELLULAR LOCATION: Nucleus {ECO:0000250}. Note=Binds to myogenic gene promoters. {ECO:0000250}.
O14647	415	CHD2	CHD2_HUMAN Chromodomain-helicase-DNA-binding protein 2 OS=Homo sapiens OX=9606 GN=CHD2 PE=1 SV=2	|KPAPSNEPEYLC#K	|1	|0.49	0.49	NA	1	1	32.8859		SUBCELLULAR LOCATION: Nucleus {ECO:0000250}. Note=Binds to myogenic gene promoters. {ECO:0000250}.
O14647	1181	CHD2	CHD2_HUMAN Chromodomain-helicase-DNA-binding protein 2 OS=Homo sapiens OX=9606 GN=CHD2 PE=1 SV=2	LGELIHNSC#VSAMQEYEEQLKENASEGK|LGELIHNSC#VSAMQEYEEQLKENASEGK	2|2	0.39|0.37	0.38	0.01414	4	2	27.5362		SUBCELLULAR LOCATION: Nucleus {ECO:0000250}. Note=Binds to myogenic gene promoters. {ECO:0000250}.
Q12873	1838	CHD3	CHD3_HUMAN Chromodomain-helicase-DNA-binding protein 3 OS=Homo sapiens OX=9606 GN=CHD3 PE=1 SV=3	FAEAEC#LAESHQHLSK|FAEAEC#LAESHQHLSK	2|3	0.795|0.39	0.5925	0.28638	5	2	37.2057		SUBCELLULAR LOCATION: Nucleus {ECO:0000269|PubMed:17626165}. Cytoplasm, cytoskeleton, microtubule organizing center, centrosome {ECO:0000269|PubMed:17626165}. Note=Associates with centrosomes in interphase and mitosis.
Q12873	1464	CHD3	CHD3_HUMAN Chromodomain-helicase-DNA-binding protein 3 OS=Homo sapiens OX=9606 GN=CHD3 PE=1 SV=3	HLC#EPGADGSETFADGVPR|	1|	0.39|	0.39	NA	1	1	28.0576		SUBCELLULAR LOCATION: Nucleus {ECO:0000269|PubMed:17626165}. Cytoplasm, cytoskeleton, microtubule organizing center, centrosome {ECO:0000269|PubMed:17626165}. Note=Associates with centrosomes in interphase and mitosis.
Q12873	1551	CHD3	CHD3_HUMAN Chromodomain-helicase-DNA-binding protein 3 OS=Homo sapiens OX=9606 GN=CHD3 PE=1 SV=3	|TSPTTPEASATNSPC#TSKPATPAPSEK	|1	|0.25	0.25	NA	1	1	20		SUBCELLULAR LOCATION: Nucleus {ECO:0000269|PubMed:17626165}. Cytoplasm, cytoskeleton, microtubule organizing center, centrosome {ECO:0000269|PubMed:17626165}. Note=Associates with centrosomes in interphase and mitosis.
Q12873	405	CHD3	CHD3_HUMAN Chromodomain-helicase-DNA-binding protein 3 OS=Homo sapiens OX=9606 GN=CHD3 PE=1 SV=3	AYHLVC#LDPELDR|AYHLVC#LDPELDR	4|3	0.305|0.00098	0.15299	0.21497	7	2	13.269		SUBCELLULAR LOCATION: Nucleus {ECO:0000269|PubMed:17626165}. Cytoplasm, cytoskeleton, microtubule organizing center, centrosome {ECO:0000269|PubMed:17626165}. Note=Associates with centrosomes in interphase and mitosis.
Q14839	1468	CHD4	CHD4_HUMAN Chromodomain-helicase-DNA-binding protein 4 OS=Homo sapiens OX=9606 GN=CHD4 PE=1 SV=2	HLC#EPGADGAETFADGVPR|HLC#EPGADGAETFADGVPR	3|4	0.73|2.245	1.4875	1.07127	7	2	59.799		SUBCELLULAR LOCATION: Nucleus {ECO:0000269|PubMed:17626165, ECO:0000269|PubMed:27616479}. Cytoplasm, cytoskeleton, microtubule organizing center, centrosome {ECO:0000269|PubMed:17626165}. Note=Associates with centrosomes in interphase. {ECO:0000250|UniProtKB:Q6PDQ2}.
Q14839	396	CHD4	CHD4_HUMAN Chromodomain-helicase-DNA-binding protein 4 OS=Homo sapiens OX=9606 GN=CHD4 PE=1 SV=2	AYHMVC#LDPDMEK AYHMVC#LDPDMEKAPEGK|AYHMVC#LDPDMEK AYHMVC#LDPDMEKAPEGK	7|4	0.14|0.87	0.505	0.51619	11	2	33.5548		SUBCELLULAR LOCATION: Nucleus {ECO:0000269|PubMed:17626165, ECO:0000269|PubMed:27616479}. Cytoplasm, cytoskeleton, microtubule organizing center, centrosome {ECO:0000269|PubMed:17626165}. Note=Associates with centrosomes in interphase. {ECO:0000250|UniProtKB:Q6PDQ2}.
Q14839	1827	CHD4	CHD4_HUMAN Chromodomain-helicase-DNA-binding protein 4 OS=Homo sapiens OX=9606 GN=CHD4 PE=1 SV=2	FAEVEC#LAESHQHLSK|FAEVEC#LAESHQHLSK	4|3	0.075|0.02	0.0475	0.03889	7	2	4.53461		SUBCELLULAR LOCATION: Nucleus {ECO:0000269|PubMed:17626165, ECO:0000269|PubMed:27616479}. Cytoplasm, cytoskeleton, microtubule organizing center, centrosome {ECO:0000269|PubMed:17626165}. Note=Associates with centrosomes in interphase. {ECO:0000250|UniProtKB:Q6PDQ2}.
Q8TD26	55	CHD6	CHD6_HUMAN Chromodomain-helicase-DNA-binding protein 6 OS=Homo sapiens OX=9606 GN=CHD6 PE=1 SV=4	|IEDVASHC#LPQK	|1	|1.04	1.04	NA	1	1	50.9804		SUBCELLULAR LOCATION: Nucleus, nucleoplasm {ECO:0000269|PubMed:17027977, ECO:0000269|PubMed:21899694}. Note=Enriched at sites of mRNA synthesis (PubMed:17027977). During influenza A virus infection, localizes to inactive chromatin. {ECO:0000269|PubMed:17027977, ECO:0000269|PubMed:21899694}.
Q8TD26	594	CHD6	CHD6_HUMAN Chromodomain-helicase-DNA-binding protein 6 OS=Homo sapiens OX=9606 GN=CHD6 PE=1 SV=4	C#VIIDEAHR|C#VIIDEAHR	3|2	0.1|0.085	0.0925	0.01061	5	2	8.46682		SUBCELLULAR LOCATION: Nucleus, nucleoplasm {ECO:0000269|PubMed:17027977, ECO:0000269|PubMed:21899694}. Note=Enriched at sites of mRNA synthesis (PubMed:17027977). During influenza A virus infection, localizes to inactive chromatin. {ECO:0000269|PubMed:17027977, ECO:0000269|PubMed:21899694}.
O96017	539	CHEK2	CHK2_HUMAN Serine/threonine-protein kinase Chk2 OS=Homo sapiens OX=9606 GN=CHEK2 PE=1 SV=1	RPAVC#AAVL|RPAVC#AAVL	1|2	0.00098|0.00098	0.00098	0	3	2	0		SUBCELLULAR LOCATION: [Isoform 2]: Nucleus. Note=Isoform 10 is present throughout the cell.; SUBCELLULAR LOCATION: [Isoform 4]: Nucleus.; SUBCELLULAR LOCATION: [Isoform 7]: Nucleus.; SUBCELLULAR LOCATION: [Isoform 9]: Nucleus.; SUBCELLULAR LOCATION: [Isoform 12]: Nucleus.; SUBCELLULAR LOCATION: Nucleus, PML body. Nucleus, nucleoplasm. Note=Recruited into PML bodies together with TP53.
Q8IWX8	246	CHERP	CHERP_HUMAN Calcium homeostasis endoplasmic reticulum protein OS=Homo sapiens OX=9606 GN=CHERP PE=1 SV=3	VVVPIYC#TSFLAVEEDKQQK VVVPIYC#TSFLAVEEDK|VVVPIYC#TSFLAVEEDKQQK VVVPIYC#TSFLAVEEDK	2|2	0.66|2.225	1.4425	1.10662	4	2	59.0583		SUBCELLULAR LOCATION: Cytoplasm {ECO:0000269|PubMed:10794731, ECO:0000269|PubMed:12656674, ECO:0000269|PubMed:8010949}. Cytoplasm, perinuclear region {ECO:0000269|PubMed:10794731, ECO:0000269|PubMed:12656674, ECO:0000269|PubMed:8010949}. Endoplasmic reticulum {ECO:0000269|PubMed:10794731, ECO:0000269|PubMed:12656674, ECO:0000269|PubMed:8010949}. Note=Distributed throughout the cytoplasm and also …
Q8IWX8	190	CHERP	CHERP_HUMAN Calcium homeostasis endoplasmic reticulum protein OS=Homo sapiens OX=9606 GN=CHERP PE=1 SV=3	SPPHC#ELMAGHLR|SPPHC#ELMAGHLR	14|10	0.135|0.14	0.1375	0.00354	24	2	12.0879		SUBCELLULAR LOCATION: Cytoplasm {ECO:0000269|PubMed:10794731, ECO:0000269|PubMed:12656674, ECO:0000269|PubMed:8010949}. Cytoplasm, perinuclear region {ECO:0000269|PubMed:10794731, ECO:0000269|PubMed:12656674, ECO:0000269|PubMed:8010949}. Endoplasmic reticulum {ECO:0000269|PubMed:10794731, ECO:0000269|PubMed:12656674, ECO:0000269|PubMed:8010949}. Note=Distributed throughout the cytoplasm and also …
Q8IWX8	69	CHERP	CHERP_HUMAN Calcium homeostasis endoplasmic reticulum protein OS=Homo sapiens OX=9606 GN=CHERP PE=1 SV=3	LALEQQQLIC#K|LALEQQQLIC#K	1|2	0.00098|0.05	0.02549	0.03466	3	2	2.48564		SUBCELLULAR LOCATION: Cytoplasm {ECO:0000269|PubMed:10794731, ECO:0000269|PubMed:12656674, ECO:0000269|PubMed:8010949}. Cytoplasm, perinuclear region {ECO:0000269|PubMed:10794731, ECO:0000269|PubMed:12656674, ECO:0000269|PubMed:8010949}. Endoplasmic reticulum {ECO:0000269|PubMed:10794731, ECO:0000269|PubMed:12656674, ECO:0000269|PubMed:8010949}. Note=Distributed throughout the cytoplasm and also …
P24386	364	CHM	RAE1_HUMAN Rab proteins geranylgeranyltransferase component A 1 OS=Homo sapiens OX=9606 GN=CHM PE=1 SV=3	NFLHC#LGR|NFLHC#LGR	3|3	1.47|0.29	0.88	0.83439	6	2	46.8085		SUBCELLULAR LOCATION: Cytoplasm, cytosol {ECO:0000269|PubMed:7957092}.
P26374	320	CHML	RAE2_HUMAN Rab proteins geranylgeranyltransferase component A 2 OS=Homo sapiens OX=9606 GN=CHML PE=1 SV=2	|QC#SFSEYLK	|1	|0.46	0.46	NA	1	1	31.5068		SUBCELLULAR LOCATION: Cytoplasm, cytosol {ECO:0000269|PubMed:12356470}.
P26374	366	CHML	RAE2_HUMAN Rab proteins geranylgeranyltransferase component A 2 OS=Homo sapiens OX=9606 GN=CHML PE=1 SV=2	NFLQC#LGR|NFLQC#LGR	1|1	0.06|0.05	0.055	0.00707	2	2	5.21327		SUBCELLULAR LOCATION: Cytoplasm, cytosol {ECO:0000269|PubMed:12356470}.
Q9UHD1	211	CHORDC1	CHRD1_HUMAN Cysteine and histidine-rich domain-containing protein 1 OS=Homo sapiens OX=9606 GN=CHORDC1 PE=1 SV=2	TSDFNTFLAQEGC#TK|TSDFNTFLAQEGC#TK	1|1	1.67|1.72	1.695	0.03536	2	2	62.8942	Metal binding		Note=Zinc 4;Ontology_term=ECO:0000255;evidence=ECO:0000255|PROSITE-ProRule:PRU00734
Q9UHD1	176	CHORDC1	CHRD1_HUMAN Cysteine and histidine-rich domain-containing protein 1 OS=Homo sapiens OX=9606 GN=CHORDC1 PE=1 SV=2	TYQGLESLEEVC#VYHSGVPIFHEGMK|TYQGLESLEEVC#VYHSGVPIFHEGMK	4|5	0.44|0.14	0.29	0.21213	9	2	22.4806	Metal binding		Note=Zinc 3;Ontology_term=ECO:0000255;evidence=ECO:0000255|PROSITE-ProRule:PRU00734
Q9UHD1	24	CHORDC1	CHRD1_HUMAN Cysteine and histidine-rich domain-containing protein 1 OS=Homo sapiens OX=9606 GN=CHORDC1 PE=1 SV=2	FDPETNSDDAC#TYHPGVPVFHDALK|FDPETNSDDAC#TYHPGVPVFHDALK	5|4	0.24|0.1	0.17	0.09899	9	2	14.5299	Metal binding		Note=Zinc 1;Ontology_term=ECO:0000244,ECO:0000269;evidence=ECO:0000244|PDB:2YRT,ECO:0000269|Ref.17
Q9UHD1	157	CHORDC1	CHRD1_HUMAN Cysteine and histidine-rich domain-containing protein 1 OS=Homo sapiens OX=9606 GN=CHORDC1 PE=1 SV=2	IGTSC#K|IGTSC#K	1|2	0.00515|0.0185	0.01182	0.00944	3	2	1.16819	Metal binding		Note=Zinc 3;Ontology_term=ECO:0000255;evidence=ECO:0000255|PROSITE-ProRule:PRU00734
Q9UHD1	86	CHORDC1	CHRD1_HUMAN Cysteine and histidine-rich domain-containing protein 1 OS=Homo sapiens OX=9606 GN=CHORDC1 PE=1 SV=2	ELC#ELKPK|ELC#ELKPK	2|1	1.38|1.14	1.26	0.16971	3	2	55.7522
Q8WUD6	386	CHPT1	CHPT1_HUMAN Cholinephosphotransferase 1 OS=Homo sapiens OX=9606 GN=CHPT1 PE=1 SV=1	TAC#HQAPEQVQVLSSK|TAC#HQAPEQVQVLSSK	1|2	0.00098|0.00098	0.00098	0	3	2	0		SUBCELLULAR LOCATION: Golgi apparatus membrane {ECO:0000269|PubMed:12221122}; Multi-pass membrane protein {ECO:0000269|PubMed:12221122}.
Q8WVB6	373	CHTF18	CTF18_HUMAN Chromosome transmission fidelity protein 18 homolog OS=Homo sapiens OX=9606 GN=CHTF18 PE=1 SV=1	VALLC#GPPGLGK|VALLC#GPPGLGK	1|3	0.00098|0.04	0.02049	0.02759	4	2	2.00786		SUBCELLULAR LOCATION: Nucleus {ECO:0000269|PubMed:12766176}. Note=Associates with chromatin during S phase.
O15111	371	CHUK	IKKA_HUMAN Inhibitor of nuclear factor kappa-B kinase subunit alpha OS=Homo sapiens OX=9606 GN=CHUK PE=1 SV=2	KPASQC#VLDGVR|KPASQC#VLDGVR	3|2	0.03|0.31	0.17	0.19799	5	2	14.5299		SUBCELLULAR LOCATION: Cytoplasm {ECO:0000269|PubMed:12789342, ECO:0000269|PubMed:30341167}. Nucleus {ECO:0000269|PubMed:12789342}. Note=Shuttles between the cytoplasm and the nucleus.
O15111	59	CHUK	IKKA_HUMAN Inhibitor of nuclear factor kappa-B kinase subunit alpha OS=Homo sapiens OX=9606 GN=CHUK PE=1 SV=2	WC#HEIQIMK|	1|	0.14|	0.14	NA	1	1	12.2807		SUBCELLULAR LOCATION: Cytoplasm {ECO:0000269|PubMed:12789342, ECO:0000269|PubMed:30341167}. Nucleus {ECO:0000269|PubMed:12789342}. Note=Shuttles between the cytoplasm and the nucleus.
Q8WUH1	88	CHURC1	CHUR_HUMAN Protein Churchill OS=Homo sapiens OX=9606 GN=CHURC1 PE=1 SV=2	SLKEEDGEEIVTYDHLC#K|SLKEEDGEEIVTYDHLC#K	1|2	0.2|0.19	0.195	0.00707	3	2	16.318	Metal binding		Note=Zinc 2
Q8WUH1	91	CHURC1	CHUR_HUMAN Protein Churchill OS=Homo sapiens OX=9606 GN=CHURC1 PE=1 SV=2	NC#HHVIAR|NC#HHVIAR	2|3	0.15|0.21	0.18	0.04243	5	2	15.2542	Metal binding		Note=Zinc 2
O76071	123	CIAO1	CIAO1_HUMAN Probable cytosolic iron-sulfur protein assembly protein CIAO1 OS=Homo sapiens OX=9606 GN=CIAO1 PE=1 SV=1	SVAWAPSGNLLATC#SR|SVAWAPSGNLLATC#SR	3|2	0.08|0.19	0.135	0.07778	5	2	11.8943		SUBCELLULAR LOCATION: Cytoplasm {ECO:0000269|PubMed:23585563}.
Q9Y3D0	158	CIAO2B	CIA2B_HUMAN Cytosolic iron-sulfur assembly component 2B OS=Homo sapiens OX=9606 GN=CIAO2B PE=1 SV=1	VAAALENTHLLEVVNQC#LSAR|VAAALENTHLLEVVNQC#LSAR	4|3	0.075|0.09	0.0825	0.01061	7	2	7.62125		SUBCELLULAR LOCATION: Nucleus {ECO:0000269|PubMed:20797633}. Cytoplasm, cytoskeleton, spindle {ECO:0000269|PubMed:20797633}.
Q6FI81	92	CIAPIN1	CPIN1_HUMAN Anamorsin OS=Homo sapiens OX=9606 GN=CIAPIN1 PE=1 SV=2	ILRPGGC#LFLK ILRPGGC#LFLKEPVETAVDNNSK|ILRPGGC#LFLK ILRPGGC#LFLKEPVETAVDNNSK	7|6	0.83|1.22	1.025	0.27577	13	2	50.6173		SUBCELLULAR LOCATION: Cytoplasm {ECO:0000255|HAMAP-Rule:MF_03115, ECO:0000269|PubMed:16957168}. Nucleus {ECO:0000255|HAMAP-Rule:MF_03115, ECO:0000269|PubMed:16957168}. Mitochondrion intermembrane space {ECO:0000255|HAMAP-Rule:MF_03115, ECO:0000269|PubMed:21700214}.
Q8TCG1	120	CIP2A	CIP2A_HUMAN Protein CIP2A OS=Homo sapiens OX=9606 GN=CIP2A PE=1 SV=2	|SSHTDSVFLQC#IQLLQK	|1	|0.03	0.03	NA	1	1	2.91262		SUBCELLULAR LOCATION: Membrane {ECO:0000305}; Single-pass membrane protein {ECO:0000305}. Cytoplasm {ECO:0000269|PubMed:12118381}. Note=Slightly concentrates in the perinuclear region (PubMed:12118381). {ECO:0000269|PubMed:12118381}.
Q86X95	10	CIR1	CIR1_HUMAN Corepressor interacting with RBPJ 1 OS=Homo sapiens OX=9606 GN=CIR1 PE=1 SV=1	SFANFMC#K|	1|	3.03|	3.03	NA	1	1	75.1861		SUBCELLULAR LOCATION: Nucleus speckle. Cytoplasm, cytoskeleton, microtubule organizing center, centrosome. Note=Colocalizes with NEK6 in the centrosome.
Q8N5K1	92	CISD2	CISD2_HUMAN CDGSH iron-sulfur domain-containing protein 2 OS=Homo sapiens OX=9606 GN=CISD2 PE=1 SV=1	VVNEINIEDLC#LTK|VVNEINIEDLC#LTK	1|1	6.06|3.16	4.61	2.05061	2	2	82.1747	Mutagenesis	SUBCELLULAR LOCATION: Endoplasmic reticulum membrane; Single-pass membrane protein. Mitochondrion outer membrane; Single-pass membrane protein. Note=According to PubMed:20010695, it mainly localizes to the endoplasmic reticulum. However, experiments in mouse showed that it mainly localizes to the mitochondrion outer membrane.	Note=Has the same optical signature of the native protein and improves yields of purified protein and a decreased tendency to aggregate. C->S;Ontology_term=ECO:0000269;evidence=ECO:0000269|PubMed:19580816;Dbxref=PMID:19580816
P0C7P0	71	CISD3	CISD3_HUMAN CDGSH iron-sulfur domain-containing protein 3, mitochondrial OS=Homo sapiens OX=9606 GN=CISD3 PE=1 SV=1	QPFC#DGSHFFQR|QPFC#DGSHFFQR	6|3	0.22049|0.08	0.15024	0.09934	9	2	13.0616	Metal binding	SUBCELLULAR LOCATION: Mitochondrion {ECO:0000269|PubMed:17376863}.	Note=Iron-sulfur 1 (2Fe-2S);Ontology_term=ECO:0000244,ECO:0000269;evidence=ECO:0000244|PDB:6AVJ,ECO:0000269|PubMed:29259115;Dbxref=PMID:29259115
O14578	105	CIT	CTRO_HUMAN Citron Rho-interacting kinase OS=Homo sapiens OX=9606 GN=CIT PE=1 SV=2	|SLVGC#GHFAEVQVVR	|1	|0.62	0.62	NA	1	1	38.2716		SUBCELLULAR LOCATION: Cytoplasm {ECO:0000250}.
O14578	514	CIT	CTRO_HUMAN Citron Rho-interacting kinase OS=Homo sapiens OX=9606 GN=CIT PE=1 SV=2	|SLLEQDLATYITEC#SSLKR	|1	|0.27	0.27	NA	1	1	21.2598		SUBCELLULAR LOCATION: Cytoplasm {ECO:0000250}.
Q07065	100	CKAP4	CKAP4_HUMAN Cytoskeleton-associated protein 4 OS=Homo sapiens OX=9606 GN=CKAP4 PE=1 SV=2	SSSSSSASAAAAAAAASSSASC#SR|SSSSSSASAAAAAAAASSSASC#SR	3|2	0.07|0.08	0.075	0.00707	5	2	6.97674		SUBCELLULAR LOCATION: Endoplasmic reticulum membrane; Single-pass type II membrane protein. Cell membrane; Single-pass type II membrane protein. Cytoplasm, cytoskeleton. Cytoplasm, perinuclear region. Note=Translocates to the perinuclear region upon APF-stimulation.
Q14008	1500	CKAP5	CKAP5_HUMAN Cytoskeleton-associated protein 5 OS=Homo sapiens OX=9606 GN=CKAP5 PE=1 SV=3	C#EMPELVQHK|C#EMPELVQHK	1|1	0.19|1.75	0.97	1.10309	2	2	49.2386		SUBCELLULAR LOCATION: Cytoplasm, cytoskeleton, microtubule organizing center, centrosome {ECO:0000269|PubMed:14654843, ECO:0000269|PubMed:21646404, ECO:0000269|PubMed:25596274, ECO:0000269|PubMed:9570755}. Cytoplasm, cytoskeleton, spindle pole {ECO:0000269|PubMed:21646404}. Cytoplasm, cytoskeleton, spindle {ECO:0000269|PubMed:21297582, ECO:0000269|PubMed:25596274, ECO:0000269|PubMed:9570755}. Chr…
Q14008	1113	CKAP5	CKAP5_HUMAN Cytoskeleton-associated protein 5 OS=Homo sapiens OX=9606 GN=CKAP5 PE=1 SV=3	FQPASAPAEDC#ISSSTEPKPDPK|FQPASAPAEDC#ISSSTEPKPDPK	3|3	0.1|1.12	0.61	0.72125	6	2	37.8882		SUBCELLULAR LOCATION: Cytoplasm, cytoskeleton, microtubule organizing center, centrosome {ECO:0000269|PubMed:14654843, ECO:0000269|PubMed:21646404, ECO:0000269|PubMed:25596274, ECO:0000269|PubMed:9570755}. Cytoplasm, cytoskeleton, spindle pole {ECO:0000269|PubMed:21646404}. Cytoplasm, cytoskeleton, spindle {ECO:0000269|PubMed:21297582, ECO:0000269|PubMed:25596274, ECO:0000269|PubMed:9570755}. Chr…
Q14008	1795	CKAP5	CKAP5_HUMAN Cytoskeleton-associated protein 5 OS=Homo sapiens OX=9606 GN=CKAP5 PE=1 SV=3	NESELEAHLC#R ILDHLTMIDNKNESELEAHLC#R|NESELEAHLC#R ILDHLTMIDNKNESELEAHLC#R	6|5	0.375|0.48	0.4275	0.07425	11	2	29.9475		SUBCELLULAR LOCATION: Cytoplasm, cytoskeleton, microtubule organizing center, centrosome {ECO:0000269|PubMed:14654843, ECO:0000269|PubMed:21646404, ECO:0000269|PubMed:25596274, ECO:0000269|PubMed:9570755}. Cytoplasm, cytoskeleton, spindle pole {ECO:0000269|PubMed:21646404}. Cytoplasm, cytoskeleton, spindle {ECO:0000269|PubMed:21297582, ECO:0000269|PubMed:25596274, ECO:0000269|PubMed:9570755}. Chr…
Q14008	1317	CKAP5	CKAP5_HUMAN Cytoskeleton-associated protein 5 OS=Homo sapiens OX=9606 GN=CKAP5 PE=1 SV=3	MC#LVYPASK|MC#LVYPASK	3|5	0.52|0.25	0.385	0.19092	8	2	27.7978		SUBCELLULAR LOCATION: Cytoplasm, cytoskeleton, microtubule organizing center, centrosome {ECO:0000269|PubMed:14654843, ECO:0000269|PubMed:21646404, ECO:0000269|PubMed:25596274, ECO:0000269|PubMed:9570755}. Cytoplasm, cytoskeleton, spindle pole {ECO:0000269|PubMed:21646404}. Cytoplasm, cytoskeleton, spindle {ECO:0000269|PubMed:21297582, ECO:0000269|PubMed:25596274, ECO:0000269|PubMed:9570755}. Chr…
Q14008	343	CKAP5	CKAP5_HUMAN Cytoskeleton-associated protein 5 OS=Homo sapiens OX=9606 GN=CKAP5 PE=1 SV=3	C#LTGLAVGLR|C#LTGLAVGLR	1|1	0.45|0.3	0.375	0.10607	2	2	27.2727		SUBCELLULAR LOCATION: Cytoplasm, cytoskeleton, microtubule organizing center, centrosome {ECO:0000269|PubMed:14654843, ECO:0000269|PubMed:21646404, ECO:0000269|PubMed:25596274, ECO:0000269|PubMed:9570755}. Cytoplasm, cytoskeleton, spindle pole {ECO:0000269|PubMed:21646404}. Cytoplasm, cytoskeleton, spindle {ECO:0000269|PubMed:21297582, ECO:0000269|PubMed:25596274, ECO:0000269|PubMed:9570755}. Chr…
Q14008	619	CKAP5	CKAP5_HUMAN Cytoskeleton-associated protein 5 OS=Homo sapiens OX=9606 GN=CKAP5 PE=1 SV=3	LAC#MEEFQK|LAC#MEEFQK	1|2	0.13|0.405	0.2675	0.19445	3	2	21.1045		SUBCELLULAR LOCATION: Cytoplasm, cytoskeleton, microtubule organizing center, centrosome {ECO:0000269|PubMed:14654843, ECO:0000269|PubMed:21646404, ECO:0000269|PubMed:25596274, ECO:0000269|PubMed:9570755}. Cytoplasm, cytoskeleton, spindle pole {ECO:0000269|PubMed:21646404}. Cytoplasm, cytoskeleton, spindle {ECO:0000269|PubMed:21297582, ECO:0000269|PubMed:25596274, ECO:0000269|PubMed:9570755}. Chr…
Q14008	637	CKAP5	CKAP5_HUMAN Cytoskeleton-associated protein 5 OS=Homo sapiens OX=9606 GN=CKAP5 PE=1 SV=3	TEMPC#QALVR|	2|	0.23|	0.23	NA	2	1	18.6992		SUBCELLULAR LOCATION: Cytoplasm, cytoskeleton, microtubule organizing center, centrosome {ECO:0000269|PubMed:14654843, ECO:0000269|PubMed:21646404, ECO:0000269|PubMed:25596274, ECO:0000269|PubMed:9570755}. Cytoplasm, cytoskeleton, spindle pole {ECO:0000269|PubMed:21646404}. Cytoplasm, cytoskeleton, spindle {ECO:0000269|PubMed:21297582, ECO:0000269|PubMed:25596274, ECO:0000269|PubMed:9570755}. Chr…
Q14008	427	CKAP5	CKAP5_HUMAN Cytoskeleton-associated protein 5 OS=Homo sapiens OX=9606 GN=CKAP5 PE=1 SV=3	|HC#TASTLPK	|1	|0.11	0.11	NA	1	1	9.90991		SUBCELLULAR LOCATION: Cytoplasm, cytoskeleton, microtubule organizing center, centrosome {ECO:0000269|PubMed:14654843, ECO:0000269|PubMed:21646404, ECO:0000269|PubMed:25596274, ECO:0000269|PubMed:9570755}. Cytoplasm, cytoskeleton, spindle pole {ECO:0000269|PubMed:21646404}. Cytoplasm, cytoskeleton, spindle {ECO:0000269|PubMed:21297582, ECO:0000269|PubMed:25596274, ECO:0000269|PubMed:9570755}. Chr…
Q14008	441	CKAP5	CKAP5_HUMAN Cytoskeleton-associated protein 5 OS=Homo sapiens OX=9606 GN=CKAP5 PE=1 SV=3	|SLLKPFC#AALLK	|1	|0.00098	0.00098	NA	1	1	0		SUBCELLULAR LOCATION: Cytoplasm, cytoskeleton, microtubule organizing center, centrosome {ECO:0000269|PubMed:14654843, ECO:0000269|PubMed:21646404, ECO:0000269|PubMed:25596274, ECO:0000269|PubMed:9570755}. Cytoplasm, cytoskeleton, spindle pole {ECO:0000269|PubMed:21646404}. Cytoplasm, cytoskeleton, spindle {ECO:0000269|PubMed:21297582, ECO:0000269|PubMed:25596274, ECO:0000269|PubMed:9570755}. Chr…
P12532	89	CKMT1A	KCRU_HUMAN Creatine kinase U-type, mitochondrial OS=Homo sapiens OX=9606 GN=CKMT1A PE=1 SV=1	TTPTGWTLDQC#IQTGVDNPGHPFIK|TTPTGWTLDQC#IQTGVDNPGHPFIK	1|1	3.55|8.57	6.06	3.54968	2	2	85.8357		SUBCELLULAR LOCATION: Mitochondrion inner membrane; Peripheral membrane protein; Intermembrane side.
Q7Z460	8	CLASP1	CLAP1_HUMAN CLIP-associating protein 1 OS=Homo sapiens OX=9606 GN=CLASP1 PE=1 SV=1	MESC#LAQVLQK|MESC#LAQVLQK	1|1	0.99|0.92	0.955	0.0495	2	2	48.8491		SUBCELLULAR LOCATION: Cytoplasm, cytoskeleton. Cytoplasm, cytoskeleton, microtubule organizing center, centrosome {ECO:0000269|PubMed:14654843}. Chromosome, centromere, kinetochore. Cytoplasm, cytoskeleton, spindle. Golgi apparatus, trans-Golgi network {ECO:0000305}. Note=Localizes to microtubule plus ends. Localizes to centrosomes, kinetochores and the mitotic spindle from prometaphase. Subseque…
Q7Z460	453	CLASP1	CLAP1_HUMAN CLIP-associating protein 1 OS=Homo sapiens OX=9606 GN=CLASP1 PE=1 SV=1	LIPVITSNC#TSK|LIPVITSNC#TSK	1|1	0.75|0.4	0.575	0.24749	2	2	36.5079		SUBCELLULAR LOCATION: Cytoplasm, cytoskeleton. Cytoplasm, cytoskeleton, microtubule organizing center, centrosome {ECO:0000269|PubMed:14654843}. Chromosome, centromere, kinetochore. Cytoplasm, cytoskeleton, spindle. Golgi apparatus, trans-Golgi network {ECO:0000305}. Note=Localizes to microtubule plus ends. Localizes to centrosomes, kinetochores and the mitotic spindle from prometaphase. Subseque…
Q7Z460	173	CLASP1	CLAP1_HUMAN CLIP-associating protein 1 OS=Homo sapiens OX=9606 GN=CLASP1 PE=1 SV=1	IVPHIC#NLLGDPNSQVR|IVPHIC#NLLGDPNSQVR	1|2	0.00098|0.45049	0.22573	0.31785	3	2	18.416		SUBCELLULAR LOCATION: Cytoplasm, cytoskeleton. Cytoplasm, cytoskeleton, microtubule organizing center, centrosome {ECO:0000269|PubMed:14654843}. Chromosome, centromere, kinetochore. Cytoplasm, cytoskeleton, spindle. Golgi apparatus, trans-Golgi network {ECO:0000305}. Note=Localizes to microtubule plus ends. Localizes to centrosomes, kinetochores and the mitotic spindle from prometaphase. Subseque…
Q7Z460	1423	CLASP1	CLAP1_HUMAN CLIP-associating protein 1 OS=Homo sapiens OX=9606 GN=CLASP1 PE=1 SV=1	AAEEAASTLASSIHPEQC#IK|AAEEAASTLASSIHPEQC#IK	3|1	0.07|0.00098	0.03549	0.0488	4	2	3.42736		SUBCELLULAR LOCATION: Cytoplasm, cytoskeleton. Cytoplasm, cytoskeleton, microtubule organizing center, centrosome {ECO:0000269|PubMed:14654843}. Chromosome, centromere, kinetochore. Cytoplasm, cytoskeleton, spindle. Golgi apparatus, trans-Golgi network {ECO:0000305}. Note=Localizes to microtubule plus ends. Localizes to centrosomes, kinetochores and the mitotic spindle from prometaphase. Subseque…
Q7Z460	864	CLASP1	CLAP1_HUMAN CLIP-associating protein 1 OS=Homo sapiens OX=9606 GN=CLASP1 PE=1 SV=1	QTEDVAEVLNHC#ASSNWSER|QTEDVAEVLNHC#ASSNWSER	2|1	0.00098|0.00098	0.00098	0	3	2	0		SUBCELLULAR LOCATION: Cytoplasm, cytoskeleton. Cytoplasm, cytoskeleton, microtubule organizing center, centrosome {ECO:0000269|PubMed:14654843}. Chromosome, centromere, kinetochore. Cytoplasm, cytoskeleton, spindle. Golgi apparatus, trans-Golgi network {ECO:0000305}. Note=Localizes to microtubule plus ends. Localizes to centrosomes, kinetochores and the mitotic spindle from prometaphase. Subseque…
O75122	976	CLASP2	CLAP2_HUMAN CLIP-associating protein 2 OS=Homo sapiens OX=9606 GN=CLASP2 PE=1 SV=3	KDDGDSMC#GGPGMSDPR|KDDGDSMC#GGPGMSDPR	2|1	0.425|0.38	0.4025	0.03182	3	2	28.6988		SUBCELLULAR LOCATION: Cytoplasm, cytoskeleton {ECO:0000269|PubMed:15631994, ECO:0000269|PubMed:20937854}. Cytoplasm, cytoskeleton, microtubule organizing center, centrosome {ECO:0000269|PubMed:16914514}. Chromosome, centromere, kinetochore {ECO:0000269|PubMed:16866869, ECO:0000269|PubMed:16914514}. Cytoplasm, cytoskeleton, spindle {ECO:0000269|PubMed:16866869, ECO:0000269|PubMed:16914514}. Golgi …
O75122	221	CLASP2	CLAP2_HUMAN CLIP-associating protein 2 OS=Homo sapiens OX=9606 GN=CLASP2 PE=1 SV=3	LIPLITSNC#TSK|LIPLITSNC#TSK	3|1	0.00098|0.00098	0.00098	0	4	2	0		SUBCELLULAR LOCATION: Cytoplasm, cytoskeleton {ECO:0000269|PubMed:15631994, ECO:0000269|PubMed:20937854}. Cytoplasm, cytoskeleton, microtubule organizing center, centrosome {ECO:0000269|PubMed:16914514}. Chromosome, centromere, kinetochore {ECO:0000269|PubMed:16866869, ECO:0000269|PubMed:16914514}. Cytoplasm, cytoskeleton, spindle {ECO:0000269|PubMed:16866869, ECO:0000269|PubMed:16914514}. Golgi …
P51790	733	CLCN3	CLCN3_HUMAN H(+)/Cl(-) exchange transporter 3 OS=Homo sapiens OX=9606 GN=CLCN3 PE=1 SV=2	|VC#FAQHTPSLPAESPR	|1	|0.14	0.14	NA	1	1	12.2807		SUBCELLULAR LOCATION: [Isoform 1]: Early endosome membrane {ECO:0000269|PubMed:12471024}; Multi-pass membrane protein {ECO:0000255}. Late endosome membrane {ECO:0000269|PubMed:12471024}; Multi-pass membrane protein {ECO:0000255}. Cytoplasmic vesicle, secretory vesicle membrane {ECO:0000250|UniProtKB:P51791}; Multi-pass membrane protein {ECO:0000255}. Note=Isoform 1 is localized mainly in late end…
P51798	211	CLCN7	CLCN7_HUMAN H(+)/Cl(-) exchange transporter 7 OS=Homo sapiens OX=9606 GN=CLCN7 PE=1 SV=2	C#FLNGVK|C#FLNGVK	2|1	0.35|0.22	0.285	0.09192	3	2	22.179		SUBCELLULAR LOCATION: Lysosome membrane {ECO:0000269|PubMed:17897319, ECO:0000269|PubMed:18449189, ECO:0000269|PubMed:21527911}; Multi-pass membrane protein {ECO:0000269|PubMed:17897319, ECO:0000269|PubMed:18449189, ECO:0000269|PubMed:21527911}.
Q2KHT3	364	CLEC16A	CL16A_HUMAN Protein CLEC16A OS=Homo sapiens OX=9606 GN=CLEC16A PE=1 SV=2	|C#FIKPTETLER	|1	|0.23	0.23	NA	1	1	18.6992		SUBCELLULAR LOCATION: Endosome membrane {ECO:0000250|UniProtKB:Q80U30}; Peripheral membrane protein {ECO:0000250|UniProtKB:Q80U30}. Lysosome membrane {ECO:0000250|UniProtKB:Q80U30}; Peripheral membrane protein {ECO:0000250|UniProtKB:Q80U30}. Note=Associates with the endolysosome membrane. {ECO:0000250|UniProtKB:Q80U30}.
O14967	355	CLGN	CLGN_HUMAN Calmegin OS=Homo sapiens OX=9606 GN=CLGN PE=1 SV=1	|IGC#GEWKPPMIDNPK	|1	|2.92	2.92	NA	1	1	74.4898	Disulfide bond	SUBCELLULAR LOCATION: Endoplasmic reticulum membrane; Single-pass type I membrane protein.	Ontology_term=ECO:0000250;evidence=ECO:0000250
O00299	59	CLIC1	CLIC1_HUMAN Chloride intracellular channel protein 1 OS=Homo sapiens OX=9606 GN=CLIC1 PE=1 SV=4	LC#PGGQLPFLLYGTEVHTDTNK|LC#PGGQLPFLLYGTEVHTDTNK	1|2	0.49|0.31549	0.40275	0.1234	3	2	28.7115	Disulfide bond$Mutagenesis	SUBCELLULAR LOCATION: Nucleus {ECO:0000269|PubMed:12681486, ECO:0000269|PubMed:9139710}. Nucleus membrane {ECO:0000269|PubMed:9139710}; Single-pass membrane protein {ECO:0000255}. Cytoplasm {ECO:0000269|PubMed:10793131, ECO:0000269|PubMed:11551966, ECO:0000269|PubMed:12681486, ECO:0000269|PubMed:9139710, ECO:0000305|PubMed:11978800, ECO:0000305|PubMed:14613939}. Cell membrane {ECO:0000269|PubMed:…	Note=Alternate;Ontology_term=ECO:0000269;evidence=ECO:0000269|PubMed:14613939;Dbxref=PMID:14613939$Note=Loss of dimerization and of ion transport activity. C->S;Ontology_term=ECO:0000269;evidence=ECO:0000269|PubMed:14613939;Dbxref=PMID:14613939
O00299	178	CLIC1	CLIC1_HUMAN Chloride intracellular channel protein 1 OS=Homo sapiens OX=9606 GN=CLIC1 PE=1 SV=4	KFLDGNELTLADC#NLLPK FLDGNELTLADC#NLLPK|KFLDGNELTLADC#NLLPK FLDGNELTLADC#NLLPK	4|6	0.48|0.105	0.2925	0.26517	10	2	22.6306		SUBCELLULAR LOCATION: Nucleus {ECO:0000269|PubMed:12681486, ECO:0000269|PubMed:9139710}. Nucleus membrane {ECO:0000269|PubMed:9139710}; Single-pass membrane protein {ECO:0000255}. Cytoplasm {ECO:0000269|PubMed:10793131, ECO:0000269|PubMed:11551966, ECO:0000269|PubMed:12681486, ECO:0000269|PubMed:9139710, ECO:0000305|PubMed:11978800, ECO:0000305|PubMed:14613939}. Cell membrane {ECO:0000269|PubMed:…
O00299	191	CLIC1	CLIC1_HUMAN Chloride intracellular channel protein 1 OS=Homo sapiens OX=9606 GN=CLIC1 PE=1 SV=4	LHIVQVVC#K|LHIVQVVC#K	6|4	0.1|0.24	0.17	0.09899	10	2	14.5299		SUBCELLULAR LOCATION: Nucleus {ECO:0000269|PubMed:12681486, ECO:0000269|PubMed:9139710}. Nucleus membrane {ECO:0000269|PubMed:9139710}; Single-pass membrane protein {ECO:0000255}. Cytoplasm {ECO:0000269|PubMed:10793131, ECO:0000269|PubMed:11551966, ECO:0000269|PubMed:12681486, ECO:0000269|PubMed:9139710, ECO:0000305|PubMed:11978800, ECO:0000305|PubMed:14613939}. Cell membrane {ECO:0000269|PubMed:…
Q9Y696	189	CLIC4	CLIC4_HUMAN Chloride intracellular channel protein 4 OS=Homo sapiens OX=9606 GN=CLIC4 PE=1 SV=4	|KFLDGNEMTLADC#NLLPK	|1	|0.11	0.11	NA	1	1	9.90991		SUBCELLULAR LOCATION: Cytoplasm, cytoskeleton, microtubule organizing center, centrosome. Cytoplasmic vesicle membrane {ECO:0000305}; Single-pass membrane protein {ECO:0000305}. Nucleus matrix. Cell membrane {ECO:0000305}; Single-pass membrane protein {ECO:0000305}. Mitochondrion. Cell junction. Note=Colocalized with AKAP9 at the centrosome and midbody. Exists both as soluble cytoplasmic protein …
P30622	111	CLIP1	CLIP1_HUMAN CAP-Gly domain-containing linker protein 1 OS=Homo sapiens OX=9606 GN=CLIP1 PE=1 SV=2	YFQC#EPLK|YFQC#EPLK	2|2	4.18|1.915	3.0475	1.6016	4	2	75.2934		SUBCELLULAR LOCATION: Cytoplasm {ECO:0000305}. Cytoplasm, cytoskeleton {ECO:0000269|PubMed:17889670, ECO:0000269|PubMed:21646404}. Cytoplasmic vesicle membrane {ECO:0000269|PubMed:12433698}; Peripheral membrane protein; Cytoplasmic side. Cell projection, ruffle {ECO:0000269|PubMed:12433698}. Note=Localizes to microtubule plus ends (PubMed:21646404, PubMed:17889670). Localizes preferentially to th…
Q9UDT6	525	CLIP2	CLIP2_HUMAN CAP-Gly domain-containing linker protein 2 OS=Homo sapiens OX=9606 GN=CLIP2 PE=1 SV=1	RGEIEELQQC#LLHSGPPPPDHPDAAEILR|RGEIEELQQC#LLHSGPPPPDHPDAAEILR	3|3	0.6|0.36	0.48	0.16971	6	2	32.4324		SUBCELLULAR LOCATION: Cytoplasm {ECO:0000250|UniProtKB:O55156}. Cytoplasm, cytoskeleton {ECO:0000250|UniProtKB:Q9Z0H8}. Note=Localizes preferentially to the ends of tyrosinated microtubules. {ECO:0000250|UniProtKB:Q9Z0H8}.
P49759	52	CLK1	CLK1_HUMAN Dual specificity protein kinase CLK1 OS=Homo sapiens OX=9606 GN=CLK1 PE=1 SV=2	|MC#DSHYLESR	|2	|0.21549	0.21549	NA	2	1	17.7287		SUBCELLULAR LOCATION: Nucleus.
Q96JQ2	438	CLMN	CLMN_HUMAN Calmin OS=Homo sapiens OX=9606 GN=CLMN PE=1 SV=1	TVHFEADTYKDPFC#SK|TVHFEADTYKDPFC#SK	2|2	0.78|0.43	0.605	0.24749	4	2	37.6947		SUBCELLULAR LOCATION: Membrane {ECO:0000305}; Single-pass type IV membrane protein {ECO:0000305}.
Q96JQ2	353	CLMN	CLMN_HUMAN Calmin OS=Homo sapiens OX=9606 GN=CLMN PE=1 SV=1	VFVC#DKPESMK|VFVC#DKPESMK	1|1	0.95|0.19	0.57	0.5374	2	2	36.3057		SUBCELLULAR LOCATION: Membrane {ECO:0000305}; Single-pass type IV membrane protein {ECO:0000305}.
Q96JQ2	445	CLMN	CLMN_HUMAN Calmin OS=Homo sapiens OX=9606 GN=CLMN PE=1 SV=1	NLSLC#FEGSPR|	1|	0.01|	0.01	NA	1	1	0.990099		SUBCELLULAR LOCATION: Membrane {ECO:0000305}; Single-pass type IV membrane protein {ECO:0000305}.
P54105	73	CLNS1A	ICLN_HUMAN Methylosome subunit pICln OS=Homo sapiens OX=9606 GN=CLNS1A PE=1 SV=1	SDC#LGEHLYVMVNAK DRSDC#LGEHLYVMVNAK|SDC#LGEHLYVMVNAK DRSDC#LGEHLYVMVNAK	5|6	0.41|0.305	0.3575	0.07425	11	2	26.3352		SUBCELLULAR LOCATION: Cytoplasm, cytosol {ECO:0000269|PubMed:18984161, ECO:0000269|PubMed:21081503}. Nucleus {ECO:0000269|PubMed:18984161, ECO:0000269|PubMed:21081503}. Cytoplasm, cytoskeleton {ECO:0000269|PubMed:18984161}. Note=A small fraction is also associated with the cytoskeleton (PubMed:18984161).
Q92989	311	CLP1	CLP1_HUMAN Polyribonucleotide 5'-hydroxyl-kinase Clp1 OS=Homo sapiens OX=9606 GN=CLP1 PE=1 SV=1	GC#FYPHAFNVK|GC#FYPHAFNVK	1|1	0.31|1.41	0.86	0.77782	2	2	46.2366		SUBCELLULAR LOCATION: Nucleus {ECO:0000255|HAMAP-Rule:MF_03035, ECO:0000269|PubMed:11060040, ECO:0000269|PubMed:24766810}.
Q9H078	267	CLPB	CLPB_HUMAN Caseinolytic peptidase B protein homolog OS=Homo sapiens OX=9606 GN=CLPB PE=1 SV=1	|GC#TALHYAVLADDYR	|2	|0.37	0.37	NA	2	1	27.0073		SUBCELLULAR LOCATION: Mitochondrion {ECO:0000269|PubMed:25597510}.
P09497	199	CLTB	CLCB_HUMAN Clathrin light chain B OS=Homo sapiens OX=9606 GN=CLTB PE=1 SV=1	VAQLC#DFNPK|VAQLC#DFNPK	3|3	0.49|0.71	0.6	0.15556	6	2	37.5	Disulfide bond	SUBCELLULAR LOCATION: Cytoplasmic vesicle membrane; Peripheral membrane protein; Cytoplasmic side. Membrane, coated pit; Peripheral membrane protein; Cytoplasmic side. Note=Cytoplasmic face of coated pits and vesicles.	Ontology_term=ECO:0000250;evidence=ECO:0000250
Q00610	1528	CLTC	CLH1_HUMAN Clathrin heavy chain 1 OS=Homo sapiens OX=9606 GN=CLTC PE=1 SV=5	|QSVELC#K	|1	|2.21	2.21	NA	1	1	68.8474		SUBCELLULAR LOCATION: Cytoplasmic vesicle membrane {ECO:0000269|PubMed:17081065}; Peripheral membrane protein {ECO:0000269|PubMed:17081065}; Cytoplasmic side {ECO:0000269|PubMed:17081065}. Membrane, coated pit {ECO:0000269|PubMed:17081065}; Peripheral membrane protein {ECO:0000269|PubMed:17081065}; Cytoplasmic side {ECO:0000269|PubMed:17081065}. Melanosome {ECO:0000269|PubMed:17081065}. Cytoplasm…
Q00610	436	CLTC	CLH1_HUMAN Clathrin heavy chain 1 OS=Homo sapiens OX=9606 GN=CLTC PE=1 SV=5	YESLELC#RPVLQQGR|YESLELC#R YESLELC#RPVLQQGR	3|5	0.17|0.19	0.18	0.01414	8	2	15.2542		SUBCELLULAR LOCATION: Cytoplasmic vesicle membrane {ECO:0000269|PubMed:17081065}; Peripheral membrane protein {ECO:0000269|PubMed:17081065}; Cytoplasmic side {ECO:0000269|PubMed:17081065}. Membrane, coated pit {ECO:0000269|PubMed:17081065}; Peripheral membrane protein {ECO:0000269|PubMed:17081065}; Cytoplasmic side {ECO:0000269|PubMed:17081065}. Melanosome {ECO:0000269|PubMed:17081065}. Cytoplasm…
Q00610	459	CLTC	CLH1_HUMAN Clathrin heavy chain 1 OS=Homo sapiens OX=9606 GN=CLTC PE=1 SV=5	EDKLEC#SEELGDLVK WLKEDKLEC#SEELGDLVK LEC#SEELGDLVK|EDKLEC#SEELGDLVK WLKEDKLEC#SEELGDLVK LEC#SEELGDLVK	5|7	0.09|0.07	0.08	0.01414	12	2	7.40741		SUBCELLULAR LOCATION: Cytoplasmic vesicle membrane {ECO:0000269|PubMed:17081065}; Peripheral membrane protein {ECO:0000269|PubMed:17081065}; Cytoplasmic side {ECO:0000269|PubMed:17081065}. Membrane, coated pit {ECO:0000269|PubMed:17081065}; Peripheral membrane protein {ECO:0000269|PubMed:17081065}; Cytoplasmic side {ECO:0000269|PubMed:17081065}. Melanosome {ECO:0000269|PubMed:17081065}. Cytoplasm…
Q00610	217	CLTC	CLH1_HUMAN Clathrin heavy chain 1 OS=Homo sapiens OX=9606 GN=CLTC PE=1 SV=5	MEGNAEESTLFC#FAVR|MEGNAEESTLFC#FAVR	11|12	0.07|0.06	0.065	0.00707	23	2	6.10329		SUBCELLULAR LOCATION: Cytoplasmic vesicle membrane {ECO:0000269|PubMed:17081065}; Peripheral membrane protein {ECO:0000269|PubMed:17081065}; Cytoplasmic side {ECO:0000269|PubMed:17081065}. Membrane, coated pit {ECO:0000269|PubMed:17081065}; Peripheral membrane protein {ECO:0000269|PubMed:17081065}; Cytoplasmic side {ECO:0000269|PubMed:17081065}. Melanosome {ECO:0000269|PubMed:17081065}. Cytoplasm…
Q00610	778	CLTC	CLH1_HUMAN Clathrin heavy chain 1 OS=Homo sapiens OX=9606 GN=CLTC PE=1 SV=5	|LTDQLPLIIVC#DR	|1	|0.06	0.06	NA	1	1	5.66038		SUBCELLULAR LOCATION: Cytoplasmic vesicle membrane {ECO:0000269|PubMed:17081065}; Peripheral membrane protein {ECO:0000269|PubMed:17081065}; Cytoplasmic side {ECO:0000269|PubMed:17081065}. Membrane, coated pit {ECO:0000269|PubMed:17081065}; Peripheral membrane protein {ECO:0000269|PubMed:17081065}; Cytoplasmic side {ECO:0000269|PubMed:17081065}. Melanosome {ECO:0000269|PubMed:17081065}. Cytoplasm…
Q00610	870	CLTC	CLH1_HUMAN Clathrin heavy chain 1 OS=Homo sapiens OX=9606 GN=CLTC PE=1 SV=5	IHEGC#EEPATHNALAK|IHEGC#EEPATHNALAK	3|7	0.04|0.05	0.045	0.00707	10	2	4.30622		SUBCELLULAR LOCATION: Cytoplasmic vesicle membrane {ECO:0000269|PubMed:17081065}; Peripheral membrane protein {ECO:0000269|PubMed:17081065}; Cytoplasmic side {ECO:0000269|PubMed:17081065}. Membrane, coated pit {ECO:0000269|PubMed:17081065}; Peripheral membrane protein {ECO:0000269|PubMed:17081065}; Cytoplasmic side {ECO:0000269|PubMed:17081065}. Melanosome {ECO:0000269|PubMed:17081065}. Cytoplasm…
Q00610	491	CLTC	CLH1_HUMAN Clathrin heavy chain 1 OS=Homo sapiens OX=9606 GN=CLTC PE=1 SV=5	VIQC#FAETGQVQK|VIQC#FAETGQVQK	3|2	0.04|0.045	0.0425	0.00354	5	2	4.07674		SUBCELLULAR LOCATION: Cytoplasmic vesicle membrane {ECO:0000269|PubMed:17081065}; Peripheral membrane protein {ECO:0000269|PubMed:17081065}; Cytoplasmic side {ECO:0000269|PubMed:17081065}. Membrane, coated pit {ECO:0000269|PubMed:17081065}; Peripheral membrane protein {ECO:0000269|PubMed:17081065}; Cytoplasmic side {ECO:0000269|PubMed:17081065}. Melanosome {ECO:0000269|PubMed:17081065}. Cytoplasm…
Q00610	736	CLTC	CLH1_HUMAN Clathrin heavy chain 1 OS=Homo sapiens OX=9606 GN=CLTC PE=1 SV=5	YIQAAC#K|YIQAAC#K	1|2	0.03|0.04837	0.03918	0.01299	3	2	3.77028		SUBCELLULAR LOCATION: Cytoplasmic vesicle membrane {ECO:0000269|PubMed:17081065}; Peripheral membrane protein {ECO:0000269|PubMed:17081065}; Cytoplasmic side {ECO:0000269|PubMed:17081065}. Membrane, coated pit {ECO:0000269|PubMed:17081065}; Peripheral membrane protein {ECO:0000269|PubMed:17081065}; Cytoplasmic side {ECO:0000269|PubMed:17081065}. Melanosome {ECO:0000269|PubMed:17081065}. Cytoplasm…
Q00610	151	CLTC	CLH1_HUMAN Clathrin heavy chain 1 OS=Homo sapiens OX=9606 GN=CLTC PE=1 SV=5	HSSLAGC#QIINYR|HSSLAGC#QIINYR	6|4	0.015|0.0118	0.0134	0.00226	10	2	1.32228		SUBCELLULAR LOCATION: Cytoplasmic vesicle membrane {ECO:0000269|PubMed:17081065}; Peripheral membrane protein {ECO:0000269|PubMed:17081065}; Cytoplasmic side {ECO:0000269|PubMed:17081065}. Membrane, coated pit {ECO:0000269|PubMed:17081065}; Peripheral membrane protein {ECO:0000269|PubMed:17081065}; Cytoplasmic side {ECO:0000269|PubMed:17081065}. Melanosome {ECO:0000269|PubMed:17081065}. Cytoplasm…
Q00610	918	CLTC	CLH1_HUMAN Clathrin heavy chain 1 OS=Homo sapiens OX=9606 GN=CLTC PE=1 SV=5	RDPHLAC#VAYER DPHLAC#VAYER|RDPHLAC#VAYER DPHLAC#VAYER	17|20	0.00978|0.015	0.01239	0.00369	37	2	1.22384		SUBCELLULAR LOCATION: Cytoplasmic vesicle membrane {ECO:0000269|PubMed:17081065}; Peripheral membrane protein {ECO:0000269|PubMed:17081065}; Cytoplasmic side {ECO:0000269|PubMed:17081065}. Membrane, coated pit {ECO:0000269|PubMed:17081065}; Peripheral membrane protein {ECO:0000269|PubMed:17081065}; Cytoplasmic side {ECO:0000269|PubMed:17081065}. Melanosome {ECO:0000269|PubMed:17081065}. Cytoplasm…
Q00610	617	CLTC	CLH1_HUMAN Clathrin heavy chain 1 OS=Homo sapiens OX=9606 GN=CLTC PE=1 SV=5	AHIAQLC#EK|AHIAQLC#EK	4|6	0.00527|0.01491	0.01009	0.00682	10	2	0.998921		SUBCELLULAR LOCATION: Cytoplasmic vesicle membrane {ECO:0000269|PubMed:17081065}; Peripheral membrane protein {ECO:0000269|PubMed:17081065}; Cytoplasmic side {ECO:0000269|PubMed:17081065}. Membrane, coated pit {ECO:0000269|PubMed:17081065}; Peripheral membrane protein {ECO:0000269|PubMed:17081065}; Cytoplasmic side {ECO:0000269|PubMed:17081065}. Melanosome {ECO:0000269|PubMed:17081065}. Cytoplasm…
Q00610	1102	CLTC	CLH1_HUMAN Clathrin heavy chain 1 OS=Homo sapiens OX=9606 GN=CLTC PE=1 SV=5	C#NEPAVWSQLAK|C#NEPAVWSQLAK	2|3	0.00648|0.00946	0.00797	0.00211	5	2	0.790698		SUBCELLULAR LOCATION: Cytoplasmic vesicle membrane {ECO:0000269|PubMed:17081065}; Peripheral membrane protein {ECO:0000269|PubMed:17081065}; Cytoplasmic side {ECO:0000269|PubMed:17081065}. Membrane, coated pit {ECO:0000269|PubMed:17081065}; Peripheral membrane protein {ECO:0000269|PubMed:17081065}; Cytoplasmic side {ECO:0000269|PubMed:17081065}. Melanosome {ECO:0000269|PubMed:17081065}. Cytoplasm…
Q00610	682	CLTC	CLH1_HUMAN Clathrin heavy chain 1 OS=Homo sapiens OX=9606 GN=CLTC PE=1 SV=5	QNLQIC#VQVASK|QNLQIC#VQVASK	1|1	0.00098|0.00098	0.00098	0	2	2	0		SUBCELLULAR LOCATION: Cytoplasmic vesicle membrane {ECO:0000269|PubMed:17081065}; Peripheral membrane protein {ECO:0000269|PubMed:17081065}; Cytoplasmic side {ECO:0000269|PubMed:17081065}. Membrane, coated pit {ECO:0000269|PubMed:17081065}; Peripheral membrane protein {ECO:0000269|PubMed:17081065}; Cytoplasmic side {ECO:0000269|PubMed:17081065}. Melanosome {ECO:0000269|PubMed:17081065}. Cytoplasm…
O75153	88	CLUH	CLU_HUMAN Clustered mitochondria protein homolog OS=Homo sapiens OX=9606 GN=CLUH PE=1 SV=2	TC#FSLHLDGNVLDHFSELR|TC#FSLHLDGNVLDHFSELR	2|2	0.655|0.94	0.7975	0.20153	4	2	44.3672		SUBCELLULAR LOCATION: Cytoplasm {ECO:0000255|HAMAP-Rule:MF_03013}. Cytoplasmic granule {ECO:0000269|PubMed:25349259}. Note=A fraction colocalizes with tyrosinated tubulin and can be detected close to mitochondria. {ECO:0000269|PubMed:25349259}.
O75153	1196	CLUH	CLU_HUMAN Clustered mitochondria protein homolog OS=Homo sapiens OX=9606 GN=CLUH PE=1 SV=2	C#LTQQAVALQR|C#LTQQAVALQR	1|2	0.34|0.315	0.3275	0.01768	3	2	24.6704		SUBCELLULAR LOCATION: Cytoplasm {ECO:0000255|HAMAP-Rule:MF_03013}. Cytoplasmic granule {ECO:0000269|PubMed:25349259}. Note=A fraction colocalizes with tyrosinated tubulin and can be detected close to mitochondria. {ECO:0000269|PubMed:25349259}.
O75153	214	CLUH	CLU_HUMAN Clustered mitochondria protein homolog OS=Homo sapiens OX=9606 GN=CLUH PE=1 SV=2	DWKPLQC#LK|DWKPLQC#LK	1|1	0.05|0.11	0.08	0.04243	2	2	7.40741		SUBCELLULAR LOCATION: Cytoplasm {ECO:0000255|HAMAP-Rule:MF_03013}. Cytoplasmic granule {ECO:0000269|PubMed:25349259}. Note=A fraction colocalizes with tyrosinated tubulin and can be detected close to mitochondria. {ECO:0000269|PubMed:25349259}.
O75153	333	CLUH	CLU_HUMAN Clustered mitochondria protein homolog OS=Homo sapiens OX=9606 GN=CLUH PE=1 SV=2	IATPFQVYSWTAPQAEHAMDC#VR|IATPFQVYSWTAPQAEHAMDC#VR	1|1	0.11|0.05	0.08	0.04243	2	2	7.40741		SUBCELLULAR LOCATION: Cytoplasm {ECO:0000255|HAMAP-Rule:MF_03013}. Cytoplasmic granule {ECO:0000269|PubMed:25349259}. Note=A fraction colocalizes with tyrosinated tubulin and can be detected close to mitochondria. {ECO:0000269|PubMed:25349259}.
O75153	200	CLUH	CLU_HUMAN Clustered mitochondria protein homolog OS=Homo sapiens OX=9606 GN=CLUH PE=1 SV=2	ERPLC#PLQPQNR|ERPLC#PLQPQNR	6|3	0.04|0.02	0.03	0.01414	9	2	2.91262		SUBCELLULAR LOCATION: Cytoplasm {ECO:0000255|HAMAP-Rule:MF_03013}. Cytoplasmic granule {ECO:0000269|PubMed:25349259}. Note=A fraction colocalizes with tyrosinated tubulin and can be detected close to mitochondria. {ECO:0000269|PubMed:25349259}.
Q8NFW8	380	CMAS	NEUA_HUMAN N-acylneuraminate cytidylyltransferase OS=Homo sapiens OX=9606 GN=CMAS PE=1 SV=2	EVAYLGNEVSDEEC#LKR|EVAYLGNEVSDEEC#LKR	1|1	0.54|0.39	0.465	0.10607	2	2	31.7406		SUBCELLULAR LOCATION: Nucleus {ECO:0000269|PubMed:11602804}.
Q8NFW8	422	CMAS	NEUA_HUMAN N-acylneuraminate cytidylyltransferase OS=Homo sapiens OX=9606 GN=CMAS PE=1 SV=2	|EFAEHIC#LLMEK	|1	|0.21	0.21	NA	1	1	17.3554		SUBCELLULAR LOCATION: Nucleus {ECO:0000269|PubMed:11602804}.
Q8NFW8	364	CMAS	NEUA_HUMAN N-acylneuraminate cytidylyltransferase OS=Homo sapiens OX=9606 GN=CMAS PE=1 SV=2	EMGLC#WK|EMGLC#WK	1|1	0.1|0.04	0.07	0.04243	2	2	6.54206		SUBCELLULAR LOCATION: Nucleus {ECO:0000269|PubMed:11602804}.
Q96DG6	222	CMBL	CMBL_HUMAN Carboxymethylenebutenolidase homolog OS=Homo sapiens OX=9606 GN=CMBL PE=1 SV=1	REDC#SPADKPYIDEAR|KREDC#SPADKPYIDEAR REDC#SPADKPYIDEAR	2|6	0.405|0.235	0.32	0.12021	8	2	24.2424		SUBCELLULAR LOCATION: Cytoplasm, cytosol {ECO:0000269|PubMed:20177059}.
Q8IY22	40	CMIP	CMIP_HUMAN C-Maf-inducing protein OS=Homo sapiens OX=9606 GN=CMIP PE=1 SV=3	MGAVPC#R|	1|	0.39|	0.39	NA	1	1	28.0576		SUBCELLULAR LOCATION: Nucleus {ECO:0000269|PubMed:12939343}. Cytoplasm {ECO:0000269|PubMed:12939343}. Note=Isoform 2 is translocated to the nucleus and is specifically recruited during minimal change nephrotic syndrome (MCNS) (PubMed:12939343) (PubMed:15616553). Detected in nuclear and cytoplasmic compartments during MCNS relapse (PubMed:12939343) (PubMed:15616553). Expressed in cytoplasm only du…
Q8IY22	47	CMIP	CMIP_HUMAN C-Maf-inducing protein OS=Homo sapiens OX=9606 GN=CMIP PE=1 SV=3	ALLLC#NGMR|ALLLC#NGMR	1|1	0.27|0.32	0.295	0.03536	2	2	22.7799		SUBCELLULAR LOCATION: Nucleus {ECO:0000269|PubMed:12939343}. Cytoplasm {ECO:0000269|PubMed:12939343}. Note=Isoform 2 is translocated to the nucleus and is specifically recruited during minimal change nephrotic syndrome (MCNS) (PubMed:12939343) (PubMed:15616553). Detected in nuclear and cytoplasmic compartments during MCNS relapse (PubMed:12939343) (PubMed:15616553). Expressed in cytoplasm only du…
Q8IY22	738	CMIP	CMIP_HUMAN C-Maf-inducing protein OS=Homo sapiens OX=9606 GN=CMIP PE=1 SV=3	SLC#SLNMNSTK|SLC#SLNMNSTK	2|2	0.27549|0.17549	0.22549	0.07071	4	2	18.4		SUBCELLULAR LOCATION: Nucleus {ECO:0000269|PubMed:12939343}. Cytoplasm {ECO:0000269|PubMed:12939343}. Note=Isoform 2 is translocated to the nucleus and is specifically recruited during minimal change nephrotic syndrome (MCNS) (PubMed:12939343) (PubMed:15616553). Detected in nuclear and cytoplasmic compartments during MCNS relapse (PubMed:12939343) (PubMed:15616553). Expressed in cytoplasm only du…
Q8IY22	514	CMIP	CMIP_HUMAN C-Maf-inducing protein OS=Homo sapiens OX=9606 GN=CMIP PE=1 SV=3	QEVHSC#LLSVR|QEVHSC#LLSVR	1|2	0.16|0.2	0.18	0.02828	3	2	15.2542		SUBCELLULAR LOCATION: Nucleus {ECO:0000269|PubMed:12939343}. Cytoplasm {ECO:0000269|PubMed:12939343}. Note=Isoform 2 is translocated to the nucleus and is specifically recruited during minimal change nephrotic syndrome (MCNS) (PubMed:12939343) (PubMed:15616553). Detected in nuclear and cytoplasmic compartments during MCNS relapse (PubMed:12939343) (PubMed:15616553). Expressed in cytoplasm only du…
Q8IY22	572	CMIP	CMIP_HUMAN C-Maf-inducing protein OS=Homo sapiens OX=9606 GN=CMIP PE=1 SV=3	|LGPC#MLLALR	|1	|0.16	0.16	NA	1	1	13.7931		SUBCELLULAR LOCATION: Nucleus {ECO:0000269|PubMed:12939343}. Cytoplasm {ECO:0000269|PubMed:12939343}. Note=Isoform 2 is translocated to the nucleus and is specifically recruited during minimal change nephrotic syndrome (MCNS) (PubMed:12939343) (PubMed:15616553). Detected in nuclear and cytoplasmic compartments during MCNS relapse (PubMed:12939343) (PubMed:15616553). Expressed in cytoplasm only du…
Q8IY22	455	CMIP	CMIP_HUMAN C-Maf-inducing protein OS=Homo sapiens OX=9606 GN=CMIP PE=1 SV=3	TLGC#YVEILK|TLGC#YVEILK	1|1	0.06|0.15	0.105	0.06364	2	2	9.50226		SUBCELLULAR LOCATION: Nucleus {ECO:0000269|PubMed:12939343}. Cytoplasm {ECO:0000269|PubMed:12939343}. Note=Isoform 2 is translocated to the nucleus and is specifically recruited during minimal change nephrotic syndrome (MCNS) (PubMed:12939343) (PubMed:15616553). Detected in nuclear and cytoplasmic compartments during MCNS relapse (PubMed:12939343) (PubMed:15616553). Expressed in cytoplasm only du…
P30085	20	CMPK1	KCY_HUMAN UMP-CMP kinase OS=Homo sapiens OX=9606 GN=CMPK1 PE=1 SV=3	|GTQC#AR	|1	|0.04	0.04	NA	1	1	3.84615		SUBCELLULAR LOCATION: Nucleus {ECO:0000255|HAMAP-Rule:MF_03172, ECO:0000269|PubMed:10462544, ECO:0000269|PubMed:11912132}. Cytoplasm {ECO:0000255|HAMAP-Rule:MF_03172, ECO:0000269|PubMed:10462544, ECO:0000269|PubMed:11912132}. Note=Predominantly cytoplasmic, less than 15% nuclear. {ECO:0000269|PubMed:11912132}.
P62633	54	CNBP	CNBP_HUMAN Cellular nucleic acid-binding protein OS=Homo sapiens OX=9606 GN=CNBP PE=1 SV=1	SSLPDIC#YR SLPDIC#YR GFQFVSSSLPDIC#YR|SLPDIC#YR SSLPDIC#YR FVSSSLPDIC#YR QFVSSSLPDIC#YR GFQFVSSSLPDIC#YR	5|5	0.12|0.34	0.23	0.15556	10	2	18.6992		SUBCELLULAR LOCATION: Cytoplasm {ECO:0000250}. Endoplasmic reticulum {ECO:0000250}.
P62633	158	CNBP	CNBP_HUMAN Cellular nucleic acid-binding protein OS=Homo sapiens OX=9606 GN=CNBP PE=1 SV=1	TSEVNC#YR|TSEVNC#YR	2|1	0.21|0.16	0.185	0.03536	3	2	15.6118		SUBCELLULAR LOCATION: Cytoplasm {ECO:0000250}. Endoplasmic reticulum {ECO:0000250}.
[truncated: 5,589 more rows]
